# Supplementary material
Source: MDPI journal article supplement (https://www.mdpi.com/2073-4352/12/10/1443)

# checkCIF/PLATON report

Structure factors have been supplied for datablock(s) shelx

THIS REPORT IS FOR GUIDANCE ONLY. IF USED AS PART OF A REVIEW PROCEDURE FOR PUBLICATION, IT SHOULD NOT REPLACE THE EXPERTISE OF AN EXPERIENCED CRYSTALLOGRAPHIC REFEREE.

No syntax errors found.      CIF dictionary      Interpreting this report

## Datablock: shelx

---

|                 |                                        |                                |
|-----------------|----------------------------------------|--------------------------------|
| Bond precision: | C-C = 0.0148 A                         | Wavelength=0.71075             |
| Cell:           | a=20.5365(14)                          | b=13.5405(9)      c=13.5727(9) |
|                 | alpha=90                               | beta=92.588(4)      gamma=90   |
| Temperature:    | 173 K                                  |                                |
|                 | Calculated                             | Reported                       |
| Volume          | 3770.4(4)                              | 3770.4(4)                      |
| Space group     | C 2/c                                  | C 2/c                          |
| Hall group      | -C 2yc                                 | -C 2yc                         |
| Moiety formula  | F13 Fe3, 1.5(C4 H12 N2),<br>C2 H6 N, O | ?                              |
| Sum formula     | C8 H24 F13 Fe3 N4 O                    | C8 H26 F13 Fe3 N4 O            |
| Mr              | 606.86                                 | 608.88                         |
| Dx,g cm-3       | 2.138                                  | 2.145                          |
| Z               | 8                                      | 8                              |
| Mu (mm-1)       | 2.410                                  | 2.410                          |
| F000            | 2424.0                                 | 2440.0                         |
| F000'           | 2434.14                                |                                |
| h,k,lmax        | 24,16,16                               | 24,16,16                       |
| Nref            | 3321                                   | 3321                           |
| Tmin,Tmax       | 0.845,0.930                            | 0.734,1.000                    |
| Tmin'           | 0.845                                  |                                |

Correction method= # Reported T Limits: Tmin=0.734 Tmax=1.000  
AbsCorr = MULTI-SCAN

Data completeness= 1.000      Theta(max)= 24.998

R(reflections)= 0.0608( 1790)      wR2(reflections)= 0.1790( 3321)

S = 1.014      Npar= 264

---

The following ALERTS were generated. Each ALERT has the format

**test-name\_ALERT\_alert-type\_alert-level.**

Click on the hyperlinks for more details of the test.

---

### Alert level B

PLAT306\_ALERT\_2\_B Isolated Oxygen Atom (H-atoms Missing ?) ..... O1S Check  
PLAT430\_ALERT\_2\_B Short Inter D...A Contact O1S ..O1S . 2.83 Ang.  
 $1-x,y,1/2-z = 2\_655$  Check

[Author respond: O1S is a non-coordinated solvent water molecule with enlarged thermal motion, which position and the corresponding hydrogen atoms' positions can not be located accurately based on the data.](#)

### Alert level C

RINTA01\_ALERT\_3\_C The value of Rint is greater than 0.12  
Rint given 0.153  
PLAT041\_ALERT\_1\_C Calc. and Reported SumFormula Strings Differ Please Check  
PLAT043\_ALERT\_1\_C Calculated and Reported Mol. Weight Differ by .. 2.02 Check  
PLAT068\_ALERT\_1\_C Reported F000 Differs from Calcd (or Missing)... Please Check  
PLAT241\_ALERT\_2\_C High 'MainMol' Ueq as Compared to Neighbors of F12 Check  
PLAT241\_ALERT\_2\_C High 'MainMol' Ueq as Compared to Neighbors of F13 Check  
PLAT243\_ALERT\_4\_C High 'Solvent' Ueq as Compared to Neighbors of N2 Check  
PLAT260\_ALERT\_2\_C Large Average Ueq of Residue Including O1S 0.187 Check  
PLAT341\_ALERT\_3\_C Low Bond Precision on C-C Bonds ..... 0.01475 Ang.  
PLAT420\_ALERT\_2\_C D-H Without Acceptor N2 --H2A . Please Check  
PLAT431\_ALERT\_2\_C Short Inter HL..A Contact F14 ..O1S . 2.77 Ang.  
 $x,1+y,z = 1\_565$  Check  
PLAT905\_ALERT\_3\_C Negative K value in the Analysis of Variance ... -3.441 Report  
PLAT975\_ALERT\_2\_C Check Calcd Resid. Dens. 0.67A From O1S 0.44 eA-3  
PLAT976\_ALERT\_2\_C Check Calcd Resid. Dens. 0.75A From O1S -0.46 eA-3

---

### Alert level G

FORMU01\_ALERT\_2\_G There is a discrepancy between the atom counts in the  
\_chemical\_formula\_sum and the formula from the \_atom\_site\* data.  
Atom count from \_chemical\_formula\_sum: C8 H26 F13 Fe3 N4 O1  
Atom count from the \_atom\_site data: C8 H24 F13 Fe3 N4 O1  
CELLZ01\_ALERT\_1\_G Difference between formula and atom\_site contents detected.  
CELLZ01\_ALERT\_1\_G WARNING: H atoms missing from atom site list. Is this intentional?  
From the CIF: \_cell\_formula\_units\_Z 8  
From the CIF: \_chemical\_formula\_sum C8 H26 F13 Fe3 N4 O  
TEST: Compare cell contents of formula and atom\_site data

| atom | Z*formula | cif sites | diff  |
|------|-----------|-----------|-------|
| C    | 64.00     | 64.00     | 0.00  |
| H    | 208.00    | 192.00    | 16.00 |
| F    | 104.00    | 104.00    | 0.00  |
| Fe   | 24.00     | 24.00     | 0.00  |
| N    | 32.00     | 32.00     | 0.00  |
| O    | 8.00      | 8.00      | 0.00  |

PLAT004\_ALERT\_5\_G Polymeric Structure Found with Maximum Dimension 2 Info  
PLAT007\_ALERT\_5\_G Number of Unrefined Donor-H Atoms ..... 8 Report  
PLAT020\_ALERT\_3\_G The Value of Rint is Greater Than 0.12 ..... 0.153 Report  
PLAT083\_ALERT\_2\_G SHELXL Second Parameter in WGHT Unusually Large 9.31 Why ?  
PLAT432\_ALERT\_2\_G Short Inter X...Y Contact F3 ..C1 2.71 Ang.  
 $x,y,z = 1\_555$  Check  
PLAT432\_ALERT\_2\_G Short Inter X...Y Contact F4 ..C1 2.79 Ang.  
 $3/2-x,1/2+y,1/2-z = 4\_655$  Check  
PLAT432\_ALERT\_2\_G Short Inter X...Y Contact F6 ..C1 2.86 Ang.  
 $3/2-x,1/2-y,1-z = 7\_656$  Check  
PLAT794\_ALERT\_5\_G Tentative Bond Valency for Fe1 (III) . 3.08 Info  
PLAT794\_ALERT\_5\_G Tentative Bond Valency for Fe2 (III) . 3.03 Info  
PLAT794\_ALERT\_5\_G Tentative Bond Valency for Fe3 (III) . 3.07 Info

|                                                                    |              |
|--------------------------------------------------------------------|--------------|
| PLAT941_ALERT_3_G Average HKL Measurement Multiplicity .....       | 4.7 Low      |
| PLAT965_ALERT_2_G The SHELXL WEIGHT Optimisation has not Converged | Please Check |
| PLAT978_ALERT_2_G Number C-C Bonds with Positive Residual Density. | 0 Info       |

---

0 **ALERT level A** = Most likely a serious problem - resolve or explain  
 2 **ALERT level B** = A potentially serious problem, consider carefully  
 14 **ALERT level C** = Check. Ensure it is not caused by an omission or oversight  
 16 **ALERT level G** = General information/check it is not something unexpected

5 ALERT type 1 CIF construction/syntax error, inconsistent or missing data  
 16 ALERT type 2 Indicator that the structure model may be wrong or deficient  
 5 ALERT type 3 Indicator that the structure quality may be low  
 1 ALERT type 4 Improvement, methodology, query or suggestion  
 5 ALERT type 5 Informative message, check

---

It is advisable to attempt to resolve as many as possible of the alerts in all categories. Often the minor alerts point to easily fixed oversights, errors and omissions in your CIF or refinement strategy, so attention to these fine details can be worthwhile. In order to resolve some of the more serious problems it may be necessary to carry out additional measurements or structure refinements. However, the purpose of your study may justify the reported deviations and the more serious of these should normally be commented upon in the discussion or experimental section of a paper or in the "special\_details" fields of the CIF. checkCIF was carefully designed to identify outliers and unusual parameters, but every test has its limitations and alerts that are not important in a particular case may appear. Conversely, the absence of alerts does not guarantee there are no aspects of the results needing attention. It is up to the individual to critically assess their own results and, if necessary, seek expert advice.

### Publication of your CIF in IUCr journals

A basic structural check has been run on your CIF. These basic checks will be run on all CIFs submitted for publication in IUCr journals (*Acta Crystallographica*, *Journal of Applied Crystallography*, *Journal of Synchrotron Radiation*); however, if you intend to submit to *Acta Crystallographica Section C* or *E* or *IUCrData*, you should make sure that full publication checks are run on the final version of your CIF prior to submission.

### Publication of your CIF in other journals

Please refer to the *Notes for Authors* of the relevant journal for any special instructions relating to CIF submission.

---

**PLATON version of 18/09/2020; check.def file version of 20/08/2020**

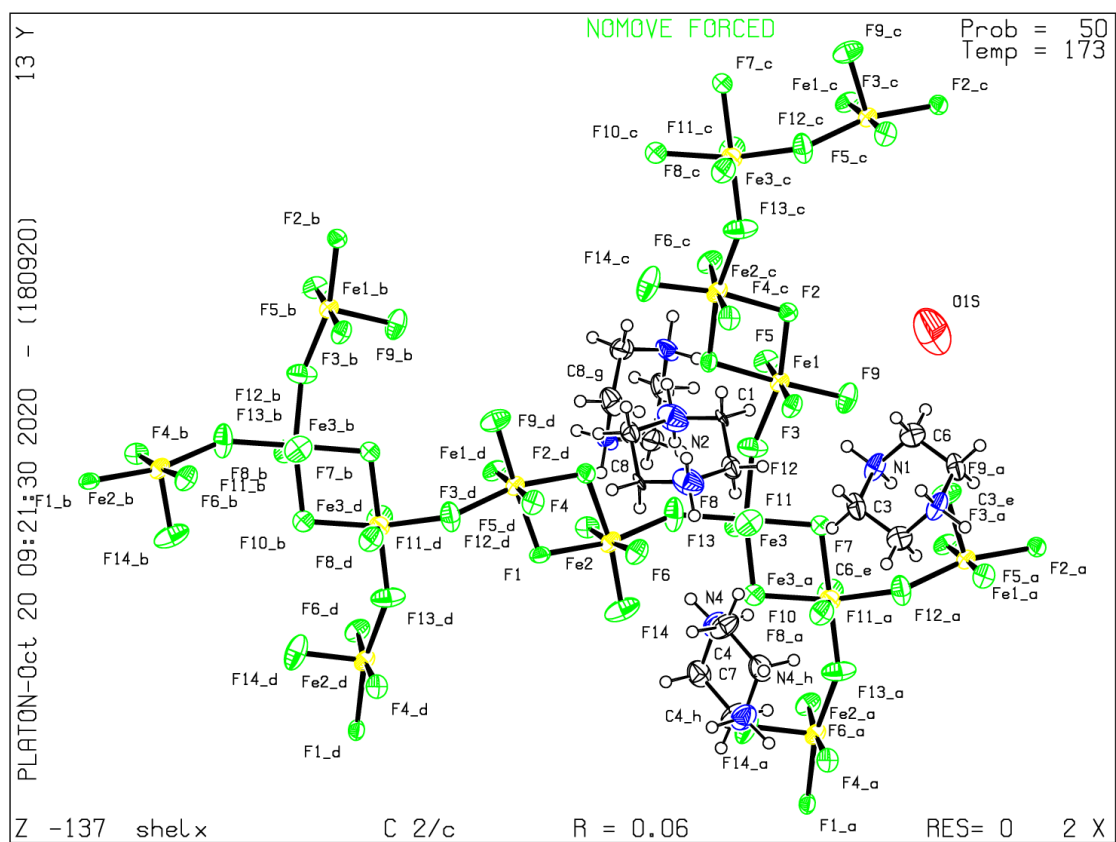

Supplement: s1 [file s1 › checkcif with respond-2.pdf]
