# Supplementary material
Source: MDPI journal article supplement (https://www.mdpi.com/2073-4352/12/10/1443)
Supplement: s1 [file s1]

Archive with 6 entries (6 files):
- 1.cif
- 2.cif
- 3.cif
- checkcif with respond-2.pdf
- checkcif-1.pdf
- checkcif-3.pdf
