# Supplementary material
Source: MDPI journal article supplement (https://www.mdpi.com/2073-4352/12/10/1443)
Supplement: s1 [file s1 › 1.cif]

 
data_shelx
 
_audit_creation_method            'SHELXL-2018/3'
_shelx_SHELXL_version_number      '2018/3'
_chemical_name_systematic         ?
_chemical_name_common             ?
_chemical_melting_point           ?
_chemical_formula_moiety          ?
_chemical_formula_sum
 'C12 H40 F18 Fe4 N6 O2' 
_chemical_formula_weight          865.90

loop_
 _atom_type_symbol
 _atom_type_description
 _atom_type_scat_dispersion_real
 _atom_type_scat_dispersion_imag
 _atom_type_scat_source
 'Fe'  'Fe'   0.3463   0.8444
 'International Tables Vol C Tables 4.2.6.8 and 6.1.1.4'
 'F'  'F'   0.0171   0.0103
 'International Tables Vol C Tables 4.2.6.8 and 6.1.1.4'
 'C'  'C'   0.0033   0.0016
 'International Tables Vol C Tables 4.2.6.8 and 6.1.1.4'
 'N'  'N'   0.0061   0.0033
 'International Tables Vol C Tables 4.2.6.8 and 6.1.1.4'
 'O'  'O'   0.0106   0.0060
 'International Tables Vol C Tables 4.2.6.8 and 6.1.1.4'
 'H'  'H'   0.0000   0.0000
 'International Tables Vol C Tables 4.2.6.8 and 6.1.1.4'
 
_space_group_crystal_system       monoclinic
_space_group_IT_number            13
_space_group_name_H-M_alt         'P 2/c'
_space_group_name_Hall            '-P 2yc'
 
_shelx_space_group_comment
;
The symmetry employed for this shelxl refinement is uniquely defined
by the following loop, which should always be used as a source of
symmetry information in preference to the above space-group names.
They are only intended as comments.
;
 
loop_
 _space_group_symop_operation_xyz
 'x, y, z'
 '-x, y, -z+1/2'
 '-x, -y, -z'
 'x, -y, z-1/2'
 
_cell_length_a                    16.9178(13)
_cell_length_b                    13.6023(10)
_cell_length_c                    12.8848(10)
_cell_angle_alpha                 90
_cell_angle_beta                  108.530(3)
_cell_angle_gamma                 90
_cell_volume                      2811.3(4)
_cell_formula_units_Z             4
_cell_measurement_temperature     173(2)
_cell_measurement_reflns_used           942
_cell_measurement_theta_min             1.3
_cell_measurement_theta_max             27.5
 
_exptl_crystal_description              'Block'
_exptl_crystal_colour                   'colourless'
_exptl_crystal_density_meas       ?
_exptl_crystal_density_method           'not measured'
_exptl_crystal_density_diffrn     2.046          
_exptl_crystal_F_000              1744
_exptl_transmission_factor_min    ?
_exptl_transmission_factor_max    ?
_exptl_crystal_size_max                 0.14
_exptl_crystal_size_mid                 0.14
_exptl_crystal_size_min                 0.09
_exptl_absorpt_coefficient_mu     2.167
_shelx_estimated_absorpt_T_min    ?
_shelx_estimated_absorpt_T_max    ?
_exptl_absorpt_correction_type          'Multi-scan'
_exptl_absorpt_correction_T_min   0.737
_exptl_absorpt_correction_T_max   1.000
_exptl_absorpt_process_details    'REQAB (Rigaku, 1998)'
_exptl_absorpt_special_details    ?
_diffrn_ambient_temperature       173(2)
_diffrn_radiation_wavelength      0.71075
_diffrn_radiation_type            MoK\a
_diffrn_source                    'Sealed Tube'
_diffrn_measurement_device
;
SCXMini: Fixed Chi 2 circle
;
_diffrn_measurement_device_type
;
Rigaku Mercury2 (2x2 bin mode)
;
_diffrn_measurement_method        'profile data from \w-scans'
_diffrn_detector_area_resol_mean  13.6612
_diffrn_reflns_number             23474
_diffrn_reflns_av_unetI/netI      0.0417
_diffrn_reflns_av_R_equivalents   0.0627
_diffrn_reflns_limit_h_min        -20
_diffrn_reflns_limit_h_max        20
_diffrn_reflns_limit_k_min        -16
_diffrn_reflns_limit_k_max        16
_diffrn_reflns_limit_l_min        -15
_diffrn_reflns_limit_l_max        15
_diffrn_reflns_theta_min          1.963
_diffrn_reflns_theta_max          25.000
_diffrn_reflns_theta_full         25.000
_diffrn_measured_fraction_theta_max   0.998
_diffrn_measured_fraction_theta_full  0.998
_diffrn_reflns_Laue_measured_fraction_max    0.998
_diffrn_reflns_Laue_measured_fraction_full   0.998
_diffrn_reflns_point_group_measured_fraction_max   0.998
_diffrn_reflns_point_group_measured_fraction_full  0.998
_reflns_number_total              4952
_reflns_number_gt                 3648
_reflns_threshold_expression      'I > 2\s(I)'
_reflns_Friedel_coverage          0.000
_reflns_Friedel_fraction_max      .
_reflns_Friedel_fraction_full     .
 
_reflns_special_details
;
 Reflections were merged by SHELXL according to the crystal
 class for the calculation of statistics and refinement.
 
 _reflns_Friedel_fraction is defined as the number of unique
 Friedel pairs measured divided by the number that would be
 possible theoretically, ignoring centric projections and
 systematic absences.
;
 
_computing_data_collection        
;
CrystalClear-SM Expert 2.1 b45 (Rigaku, 2015)
;
_computing_cell_refinement        
;
CrystalClear-SM Expert 2.1 b45 (Rigaku, 2015)
;
_computing_data_reduction         
;
CrystalClear-SM Expert 2.1 b45 (Rigaku, 2015)
;
_computing_structure_solution           'SHELXT 2018/2 (Sheldrick, 2018)'
_computing_structure_refinement 'SHELXL-2018/3 (Sheldrick, 2018)'
_computing_molecular_graphics          'Ortep for Windows (Farrugia, 2012)'
_computing_publication_material   'WinGX publication routines (Farrugia, 2012)'
_refine_special_details           ?
_refine_ls_structure_factor_coef  Fsqd
_refine_ls_matrix_type            full
_refine_ls_weighting_scheme       calc
_refine_ls_weighting_details
'w=1/[\s^2^(Fo^2^)+(0.0526P)^2^] where P=(Fo^2^+2Fc^2^)/3'
_atom_sites_solution_primary            'dual - dual-space method e.g. SHELXD'
_atom_sites_solution_secondary          'dual - dual-space method e.g. SHELXD'
_atom_sites_solution_hydrogens    geom
_refine_ls_hydrogen_treatment     constr
_refine_ls_extinction_method      none
_refine_ls_extinction_coef        .
_refine_ls_number_reflns          4952
_refine_ls_number_parameters      399
_refine_ls_number_restraints      0
_refine_ls_R_factor_all           0.0524
_refine_ls_R_factor_gt            0.0331
_refine_ls_wR_factor_ref          0.0913
_refine_ls_wR_factor_gt           0.0843
_refine_ls_goodness_of_fit_ref    1.006
_refine_ls_restrained_S_all       1.006
_refine_ls_shift/su_max           0.001
_refine_ls_shift/su_mean          0.000
 
loop_
 _atom_site_label
 _atom_site_type_symbol
 _atom_site_fract_x
 _atom_site_fract_y
 _atom_site_fract_z
 _atom_site_U_iso_or_equiv
 _atom_site_adp_type
 _atom_site_occupancy
 _atom_site_site_symmetry_order  
 _atom_site_calc_flag
 _atom_site_refinement_flags_posn
 _atom_site_refinement_flags_adp
 _atom_site_refinement_flags_occupancy
 _atom_site_disorder_assembly
 _atom_site_disorder_group
Fe1 Fe 0.90265(3) 0.27835(3) 0.69934(4) 0.01238(13) Uani 1 1 d . . . . .
Fe3 Fe 0.55765(3) 0.24434(4) 0.40508(4) 0.01354(13) Uani 1 1 d . . . . .
Fe2 Fe 0.77975(3) 0.24618(4) 0.39645(4) 0.01270(13) Uani 1 1 d . . . . .
Fe4 Fe 0.88136(3) 0.22341(4) 0.23227(4) 0.01555(14) Uani 1 1 d . . . . .
F1 F 0.99277(11) 0.27033(14) 0.84370(15) 0.0154(4) Uani 1 1 d . . . . .
F2 F 0.91150(12) 0.41481(14) 0.68770(16) 0.0186(4) Uani 1 1 d . . . . .
F3 F 0.81561(12) 0.28546(15) 0.75995(16) 0.0208(5) Uani 1 1 d . . . . .
F4 F 0.89973(11) 0.13803(14) 0.69619(15) 0.0161(4) Uani 1 1 d . . . . .
F5 F 0.81920(12) 0.27582(15) 0.55222(16) 0.0217(5) Uani 1 1 d . . . . .
F6 F 0.65897(12) 0.24411(15) 0.36083(18) 0.0244(5) Uani 1 1 d . . . . .
F7 F 0.500000 0.2796(2) 0.250000 0.0203(6) Uani 1 2 d S T P . .
F8 F 0.54222(12) 0.10748(14) 0.37027(17) 0.0197(5) Uani 1 1 d . . . . .
F9 F 0.45237(13) 0.24768(15) 0.43049(18) 0.0239(5) Uani 1 1 d . . . . .
F10 F 0.57249(13) 0.38131(14) 0.43868(17) 0.0236(5) Uani 1 1 d . . . . .
F11 F 0.62103(13) 0.21574(15) 0.55322(17) 0.0258(5) Uani 1 1 d . . . . .
F12 F 0.76821(12) 0.38190(14) 0.36650(16) 0.0203(5) Uani 1 1 d . . . . .
F13 F 0.77595(13) 0.11318(15) 0.42302(18) 0.0265(5) Uani 1 1 d . . . . .
F14 F 0.76278(12) 0.22145(14) 0.23652(15) 0.0174(4) Uani 1 1 d . . . . .
F15 F 0.89487(12) 0.24281(14) 0.39142(16) 0.0175(4) Uani 1 1 d . . . . .
F16 F 0.88211(12) 0.36106(14) 0.22051(16) 0.0208(5) Uani 1 1 d . . . . .
F17 F 1.000000 0.2232(2) 0.250000 0.0326(8) Uani 1 2 d S T P . .
F18 F 0.84423(14) 0.20704(16) 0.07990(17) 0.0279(5) Uani 1 1 d . . . . .
F19 F 0.88931(12) 0.08596(14) 0.25905(16) 0.0219(5) Uani 1 1 d . . . . .
N1 N 0.38027(19) 0.0621(2) 0.3157(3) 0.0250(7) Uani 1 1 d . . . . .
H1A H 0.342192 0.114290 0.277273 0.030 Uiso 1 1 calc R U . . .
H1B H 0.437301 0.082727 0.322999 0.030 Uiso 1 1 calc R U . . .
N2 N 0.99606(19) -0.0407(2) 0.3963(2) 0.0202(7) Uani 1 1 d . . . . .
H2A H 0.956449 0.003989 0.346093 0.024 Uiso 1 1 calc R U . . .
H2B H 1.013407 -0.089804 0.352242 0.024 Uiso 1 1 calc R U . . .
N3 N 0.26547(19) -0.0799(2) 0.3527(2) 0.0233(7) Uani 1 1 d . . . . .
H3A H 0.208430 -0.100291 0.345539 0.028 Uiso 1 1 calc R U . . .
H3B H 0.303406 -0.132324 0.390652 0.028 Uiso 1 1 calc R U . . .
N4 N 0.97451(18) 0.4761(2) 0.3852(2) 0.0200(7) Uani 1 1 d . . . . .
H4A H 0.941492 0.436323 0.323103 0.024 Uiso 1 1 calc R U . . .
H4B H 1.006290 0.524135 0.357821 0.024 Uiso 1 1 calc R U . . .
N5 N 0.6438(2) 0.6011(2) 0.6724(3) 0.0334(9) Uani 1 1 d . . . . .
H5A H 0.605648 0.657297 0.654416 0.040 Uiso 1 1 calc R U . . .
H5B H 0.691657 0.619213 0.735607 0.040 Uiso 1 1 calc R U . . .
N6 N 0.6898(2) 0.4062(2) 0.6337(3) 0.0337(9) Uani 1 1 d . . . . .
H6A H 0.729416 0.351462 0.653767 0.040 Uiso 1 1 calc R U . . .
H6B H 0.643071 0.385777 0.570229 0.040 Uiso 1 1 calc R U . . .
C1 C 0.9177(2) 0.5287(3) 0.4342(3) 0.0212(8) Uani 1 1 d . . . . .
H1C H 0.883066 0.480746 0.456699 0.025 Uiso 1 1 calc R U . . .
H1D H 0.880775 0.572181 0.379383 0.025 Uiso 1 1 calc R U . . .
C2 C 0.9544(2) -0.0907(3) 0.4672(3) 0.0218(8) Uani 1 1 d . . . . .
H2C H 0.992446 -0.139009 0.513854 0.026 Uiso 1 1 calc R U . . .
H2D H 0.904840 -0.125655 0.421737 0.026 Uiso 1 1 calc R U . . .
C3 C 1.0330(2) 0.4115(3) 0.4676(3) 0.0206(8) Uani 1 1 d . . . . .
H3C H 1.071286 0.379432 0.434890 0.025 Uiso 1 1 calc R U . . .
H3D H 1.001593 0.360209 0.490863 0.025 Uiso 1 1 calc R U . . .
C4 C 0.2733(2) -0.0651(3) 0.2416(3) 0.0285(9) Uani 1 1 d . . . . .
H4C H 0.232316 -0.016470 0.201238 0.034 Uiso 1 1 calc R U . . .
H4D H 0.261898 -0.127158 0.200812 0.034 Uiso 1 1 calc R U . . .
C5 C 0.3720(2) 0.0471(3) 0.4271(3) 0.0260(9) Uani 1 1 d . . . . .
H5C H 0.383394 0.109161 0.467888 0.031 Uiso 1 1 calc R U . . .
H5D H 0.413035 -0.001447 0.467497 0.031 Uiso 1 1 calc R U . . .
C6 C 1.0704(2) 0.0162(3) 0.4625(3) 0.0208(8) Uani 1 1 d . . . . .
H6C H 1.095728 0.049802 0.413573 0.025 Uiso 1 1 calc R U . . .
H6D H 1.111898 -0.028849 0.509030 0.025 Uiso 1 1 calc R U . . .
C7 C 0.2857(2) 0.0122(3) 0.4182(3) 0.0258(9) Uani 1 1 d . . . . .
H7A H 0.282134 0.000213 0.491599 0.031 Uiso 1 1 calc R U . . .
H7B H 0.244986 0.063177 0.383335 0.031 Uiso 1 1 calc R U . . .
C8 C 0.6730(3) 0.5793(3) 0.5782(4) 0.0356(11) Uani 1 1 d . . . . .
H8A H 0.701965 0.636787 0.561911 0.043 Uiso 1 1 calc R U . . .
H8B H 0.625085 0.565011 0.513516 0.043 Uiso 1 1 calc R U . . .
C9 C 0.3606(3) -0.0299(3) 0.2513(3) 0.0319(10) Uani 1 1 d . . . . .
H9A H 0.401207 -0.080739 0.286976 0.038 Uiso 1 1 calc R U . . .
H9B H 0.364645 -0.018562 0.178013 0.038 Uiso 1 1 calc R U . . .
C10 C 0.6007(3) 0.5157(3) 0.7014(4) 0.0377(11) Uani 1 1 d . . . . .
H10A H 0.550482 0.500117 0.640306 0.045 Uiso 1 1 calc R U . . .
H10B H 0.583676 0.531736 0.765352 0.045 Uiso 1 1 calc R U . . .
C11 C 0.6584(3) 0.4280(3) 0.7265(4) 0.0380(11) Uani 1 1 d . . . . .
H11A H 0.705666 0.441432 0.792383 0.046 Uiso 1 1 calc R U . . .
H11B H 0.628623 0.370619 0.741131 0.046 Uiso 1 1 calc R U . . .
C12 C 0.7313(2) 0.4923(3) 0.6033(4) 0.0351(10) Uani 1 1 d . . . . .
H12A H 0.747955 0.476307 0.539018 0.042 Uiso 1 1 calc R U . . .
H12B H 0.781713 0.508685 0.663733 0.042 Uiso 1 1 calc R U . . .
O1S O 0.7070(5) 0.2095(6) -0.0551(7) 0.043(2) Uani 0.503(10) 1 d . . P A 1
O1S' O 0.7308(8) 0.2685(12) -0.0814(8) 0.097(5) Uani 0.497(10) 1 d . . P A 2
O2S O 0.4785(4) 0.3228(5) 0.6450(5) 0.051(3) Uani 0.503(10) 1 d . . P A 1
O2S' O 0.4514(7) 0.2347(8) 0.6559(8) 0.097(4) Uani 0.497(10) 1 d . . P A 2
 
loop_
 _atom_site_aniso_label
 _atom_site_aniso_U_11
 _atom_site_aniso_U_22
 _atom_site_aniso_U_33
 _atom_site_aniso_U_23
 _atom_site_aniso_U_13
 _atom_site_aniso_U_12
Fe1 0.0111(3) 0.0131(3) 0.0116(3) -0.00033(19) 0.0016(2) 0.00038(19)
Fe3 0.0116(3) 0.0143(3) 0.0131(3) 0.0002(2) 0.0016(2) -0.00008(19)
Fe2 0.0104(3) 0.0142(3) 0.0119(3) 0.00021(19) 0.00124(19) -0.00036(19)
Fe4 0.0147(3) 0.0152(3) 0.0170(3) 0.0001(2) 0.0054(2) 0.0003(2)
F1 0.0135(10) 0.0202(11) 0.0121(10) 0.0002(8) 0.0035(8) 0.0008(8)
F2 0.0182(11) 0.0130(10) 0.0221(11) 0.0010(8) 0.0029(9) -0.0002(8)
F3 0.0186(11) 0.0238(11) 0.0208(11) 0.0041(9) 0.0074(9) 0.0028(9)
F4 0.0143(11) 0.0144(10) 0.0189(11) -0.0015(8) 0.0041(8) -0.0013(8)
F5 0.0191(11) 0.0286(12) 0.0136(10) -0.0012(9) -0.0001(8) -0.0001(9)
F6 0.0108(10) 0.0296(12) 0.0319(12) 0.0029(10) 0.0056(9) -0.0009(9)
F7 0.0203(16) 0.0195(16) 0.0157(15) 0.000 -0.0018(12) 0.000
F8 0.0170(11) 0.0139(10) 0.0269(11) 0.0000(9) 0.0052(9) -0.0018(8)
F9 0.0192(11) 0.0221(11) 0.0336(13) 0.0052(9) 0.0127(10) 0.0036(9)
F10 0.0263(12) 0.0152(11) 0.0234(12) -0.0023(9) -0.0002(9) -0.0010(9)
F11 0.0309(13) 0.0226(12) 0.0167(11) 0.0026(9) -0.0025(9) 0.0041(9)
F12 0.0205(11) 0.0147(11) 0.0220(11) 0.0010(8) 0.0016(9) -0.0016(8)
F13 0.0272(13) 0.0162(11) 0.0362(13) 0.0046(10) 0.0101(10) -0.0005(9)
F14 0.0134(10) 0.0227(11) 0.0145(10) -0.0021(8) 0.0020(8) 0.0014(8)
F15 0.0103(10) 0.0256(11) 0.0157(10) -0.0009(8) 0.0029(8) -0.0006(8)
F16 0.0267(12) 0.0150(11) 0.0210(11) -0.0007(8) 0.0078(9) -0.0016(8)
F17 0.0160(16) 0.037(2) 0.047(2) 0.000 0.0135(15) 0.000
F18 0.0357(13) 0.0289(12) 0.0195(11) -0.0019(10) 0.0092(10) 0.0024(10)
F19 0.0229(12) 0.0170(11) 0.0237(11) -0.0003(9) 0.0043(9) 0.0029(9)
N1 0.0176(17) 0.0269(18) 0.0285(18) 0.0094(15) 0.0043(14) -0.0025(13)
N2 0.0233(17) 0.0215(17) 0.0151(15) -0.0011(13) 0.0052(13) 0.0056(13)
N3 0.0176(17) 0.0204(17) 0.0285(18) 0.0099(14) 0.0026(14) -0.0022(13)
N4 0.0256(18) 0.0201(16) 0.0119(15) -0.0025(13) 0.0024(13) -0.0057(13)
N5 0.030(2) 0.0205(18) 0.035(2) -0.0112(15) -0.0105(16) 0.0105(15)
N6 0.0223(19) 0.0212(19) 0.046(2) -0.0154(16) -0.0062(16) 0.0050(14)
C1 0.0179(19) 0.022(2) 0.020(2) 0.0032(16) 0.0009(15) -0.0029(15)
C2 0.022(2) 0.0194(19) 0.022(2) 0.0001(16) 0.0029(16) -0.0004(15)
C3 0.026(2) 0.0173(19) 0.0192(19) -0.0005(15) 0.0082(16) 0.0005(15)
C4 0.025(2) 0.034(2) 0.023(2) 0.0014(18) 0.0013(17) -0.0080(18)
C5 0.025(2) 0.027(2) 0.024(2) 0.0013(17) 0.0049(17) -0.0044(17)
C6 0.0172(19) 0.024(2) 0.024(2) 0.0016(16) 0.0093(16) 0.0020(15)
C7 0.024(2) 0.023(2) 0.031(2) 0.0049(18) 0.0113(18) -0.0014(17)
C8 0.029(2) 0.033(2) 0.037(3) 0.004(2) -0.001(2) 0.0052(19)
C9 0.033(2) 0.039(3) 0.025(2) -0.0034(19) 0.0109(19) -0.0087(19)
C10 0.026(2) 0.044(3) 0.041(3) -0.005(2) 0.008(2) 0.009(2)
C11 0.029(3) 0.031(3) 0.046(3) 0.006(2) 0.002(2) 0.0032(19)
C12 0.022(2) 0.036(3) 0.043(3) -0.005(2) 0.0055(19) 0.0043(18)
O1S 0.046(4) 0.055(5) 0.029(4) 0.001(4) 0.012(3) -0.002(4)
O1S' 0.081(8) 0.160(13) 0.043(6) -0.015(7) 0.008(5) 0.074(8)
O2S 0.058(5) 0.050(5) 0.037(4) 0.008(3) 0.003(3) 0.013(4)
O2S' 0.140(10) 0.094(9) 0.081(7) 0.009(6) 0.072(7) -0.011(7)
 
_geom_special_details
;
 All esds (except the esd in the dihedral angle between two l.s. planes)
 are estimated using the full covariance matrix.  The cell esds are taken
 into account individually in the estimation of esds in distances, angles
 and torsion angles; correlations between esds in cell parameters are only
 used when they are defined by crystal symmetry.  An approximate (isotropic)
 treatment of cell esds is used for estimating esds involving l.s. planes.
;
 
loop_
 _geom_bond_atom_site_label_1
 _geom_bond_atom_site_label_2
 _geom_bond_distance
 _geom_bond_site_symmetry_2
 _geom_bond_publ_flag
Fe1 F2 1.8719(19) . ?
Fe1 F3 1.876(2) . ?
Fe1 F4 1.9094(19) . ?
Fe1 F5 1.971(2) . ?
Fe1 F1 1.9985(19) . ?
Fe1 F1 2.0183(19) 2_756 ?
Fe3 F11 1.909(2) . ?
Fe3 F10 1.911(2) . ?
Fe3 F9 1.911(2) . ?
Fe3 F8 1.9132(19) . ?
Fe3 F6 1.971(2) . ?
Fe3 F7 1.9838(8) . ?
Fe2 F13 1.846(2) . ?
Fe2 F12 1.883(2) . ?
Fe2 F5 1.945(2) . ?
Fe2 F6 1.947(2) . ?
Fe2 F15 1.9697(19) . ?
Fe2 F14 2.0165(19) . ?
Fe4 F18 1.875(2) . ?
Fe4 F16 1.879(2) . ?
Fe4 F19 1.898(2) . ?
Fe4 F17 1.9466(5) . ?
Fe4 F15 2.007(2) . ?
Fe4 F14 2.0244(19) . ?
N1 C9 1.480(5) . ?
N1 C5 1.500(5) . ?
N1 H1A 0.9800 . ?
N1 H1B 0.9800 . ?
N2 C2 1.485(5) . ?
N2 C6 1.492(5) . ?
N2 H2A 0.9800 . ?
N2 H2B 0.9800 . ?
N3 C7 1.488(5) . ?
N3 C4 1.492(5) . ?
N3 H3A 0.9800 . ?
N3 H3B 0.9800 . ?
N4 C3 1.488(4) . ?
N4 C1 1.490(5) . ?
N4 H4A 0.9800 . ?
N4 H4B 0.9800 . ?
N5 C8 1.478(6) . ?
N5 C10 1.482(6) . ?
N5 H5A 0.9800 . ?
N5 H5B 0.9800 . ?
N6 C12 1.480(6) . ?
N6 C11 1.485(6) . ?
N6 H6A 0.9800 . ?
N6 H6B 0.9800 . ?
C1 C3 1.512(5) 3_766 ?
C1 H1C 0.9800 . ?
C1 H1D 0.9800 . ?
C2 C6 1.505(5) 3_756 ?
C2 H2C 0.9800 . ?
C2 H2D 0.9800 . ?
C3 H3C 0.9800 . ?
C3 H3D 0.9800 . ?
C4 C9 1.520(5) . ?
C4 H4C 0.9800 . ?
C4 H4D 0.9800 . ?
C5 C7 1.505(5) . ?
C5 H5C 0.9800 . ?
C5 H5D 0.9800 . ?
C6 H6C 0.9800 . ?
C6 H6D 0.9800 . ?
C7 H7A 0.9800 . ?
C7 H7B 0.9800 . ?
C8 C12 1.509(6) . ?
C8 H8A 0.9800 . ?
C8 H8B 0.9800 . ?
C9 H9A 0.9800 . ?
C9 H9B 0.9800 . ?
C10 C11 1.510(6) . ?
C10 H10A 0.9800 . ?
C10 H10B 0.9800 . ?
C11 H11A 0.9800 . ?
C11 H11B 0.9800 . ?
C12 H12A 0.9800 . ?
C12 H12B 0.9800 . ?
 
loop_
 _geom_angle_atom_site_label_1
 _geom_angle_atom_site_label_2
 _geom_angle_atom_site_label_3
 _geom_angle
 _geom_angle_site_symmetry_1
 _geom_angle_site_symmetry_3
 _geom_angle_publ_flag
F2 Fe1 F3 94.34(9) . . ?
F2 Fe1 F4 172.58(9) . . ?
F3 Fe1 F4 92.41(9) . . ?
F2 Fe1 F5 89.50(8) . . ?
F3 Fe1 F5 89.10(9) . . ?
F4 Fe1 F5 87.50(8) . . ?
F2 Fe1 F1 94.13(8) . . ?
F3 Fe1 F1 94.76(8) . . ?
F4 Fe1 F1 88.40(8) . . ?
F5 Fe1 F1 174.49(8) . . ?
F2 Fe1 F1 86.11(8) . 2_756 ?
F3 Fe1 F1 171.85(8) . 2_756 ?
F4 Fe1 F1 87.65(8) . 2_756 ?
F5 Fe1 F1 99.05(8) . 2_756 ?
F1 Fe1 F1 77.09(8) . 2_756 ?
F11 Fe3 F10 88.89(9) . . ?
F11 Fe3 F9 95.25(9) . . ?
F10 Fe3 F9 90.03(9) . . ?
F11 Fe3 F8 91.58(9) . . ?
F10 Fe3 F8 179.53(9) . . ?
F9 Fe3 F8 89.89(9) . . ?
F11 Fe3 F6 91.45(10) . . ?
F10 Fe3 F6 90.19(9) . . ?
F9 Fe3 F6 173.31(9) . . ?
F8 Fe3 F6 89.83(9) . . ?
F11 Fe3 F7 175.30(8) . . ?
F10 Fe3 F7 88.83(10) . . ?
F9 Fe3 F7 88.86(7) . . ?
F8 Fe3 F7 90.71(10) . . ?
F6 Fe3 F7 84.46(7) . . ?
F13 Fe2 F12 172.34(9) . . ?
F13 Fe2 F5 91.87(9) . . ?
F12 Fe2 F5 89.28(9) . . ?
F13 Fe2 F6 86.21(9) . . ?
F12 Fe2 F6 86.17(9) . . ?
F5 Fe2 F6 103.68(9) . . ?
F13 Fe2 F15 94.38(9) . . ?
F12 Fe2 F15 93.17(8) . . ?
F5 Fe2 F15 91.16(8) . . ?
F6 Fe2 F15 165.14(9) . . ?
F13 Fe2 F14 91.37(9) . . ?
F12 Fe2 F14 88.98(8) . . ?
F5 Fe2 F14 168.41(8) . . ?
F6 Fe2 F14 87.64(9) . . ?
F15 Fe2 F14 77.50(8) . . ?
F18 Fe4 F16 92.44(9) . . ?
F18 Fe4 F19 93.11(9) . . ?
F16 Fe4 F19 173.88(9) . . ?
F18 Fe4 F17 96.46(7) . . ?
F16 Fe4 F17 88.74(11) . . ?
F19 Fe4 F17 88.06(11) . . ?
F18 Fe4 F15 167.67(9) . . ?
F16 Fe4 F15 87.13(8) . . ?
F19 Fe4 F15 88.01(8) . . ?
F17 Fe4 F15 95.85(6) . . ?
F18 Fe4 F14 91.24(9) . . ?
F16 Fe4 F14 92.72(8) . . ?
F19 Fe4 F14 89.75(8) . . ?
F17 Fe4 F14 172.09(6) . . ?
F15 Fe4 F14 76.48(8) . . ?
Fe1 F1 Fe1 102.56(8) . 2_756 ?
Fe2 F5 Fe1 154.37(12) . . ?
Fe2 F6 Fe3 151.15(13) . . ?
Fe3 F7 Fe3 152.02(16) . 2_655 ?
Fe2 F14 Fe4 101.83(8) . . ?
Fe2 F15 Fe4 104.12(9) . . ?
Fe4 F17 Fe4 179.80(19) 2_755 . ?
C9 N1 C5 110.4(3) . . ?
C9 N1 H1A 109.6 . . ?
C5 N1 H1A 109.6 . . ?
C9 N1 H1B 109.6 . . ?
C5 N1 H1B 109.6 . . ?
H1A N1 H1B 108.1 . . ?
C2 N2 C6 111.4(3) . . ?
C2 N2 H2A 109.4 . . ?
C6 N2 H2A 109.4 . . ?
C2 N2 H2B 109.4 . . ?
C6 N2 H2B 109.4 . . ?
H2A N2 H2B 108.0 . . ?
C7 N3 C4 110.9(3) . . ?
C7 N3 H3A 109.5 . . ?
C4 N3 H3A 109.5 . . ?
C7 N3 H3B 109.5 . . ?
C4 N3 H3B 109.5 . . ?
H3A N3 H3B 108.0 . . ?
C3 N4 C1 110.7(3) . . ?
C3 N4 H4A 109.5 . . ?
C1 N4 H4A 109.5 . . ?
C3 N4 H4B 109.5 . . ?
C1 N4 H4B 109.5 . . ?
H4A N4 H4B 108.1 . . ?
C8 N5 C10 111.7(3) . . ?
C8 N5 H5A 109.3 . . ?
C10 N5 H5A 109.3 . . ?
C8 N5 H5B 109.3 . . ?
C10 N5 H5B 109.3 . . ?
H5A N5 H5B 107.9 . . ?
C12 N6 C11 112.1(3) . . ?
C12 N6 H6A 109.2 . . ?
C11 N6 H6A 109.2 . . ?
C12 N6 H6B 109.2 . . ?
C11 N6 H6B 109.2 . . ?
H6A N6 H6B 107.9 . . ?
N4 C1 C3 110.8(3) . 3_766 ?
N4 C1 H1C 109.5 . . ?
C3 C1 H1C 109.5 3_766 . ?
N4 C1 H1D 109.5 . . ?
C3 C1 H1D 109.5 3_766 . ?
H1C C1 H1D 108.1 . . ?
N2 C2 C6 109.8(3) . 3_756 ?
N2 C2 H2C 109.7 . . ?
C6 C2 H2C 109.7 3_756 . ?
N2 C2 H2D 109.7 . . ?
C6 C2 H2D 109.7 3_756 . ?
H2C C2 H2D 108.2 . . ?
N4 C3 C1 110.1(3) . 3_766 ?
N4 C3 H3C 109.6 . . ?
C1 C3 H3C 109.6 3_766 . ?
N4 C3 H3D 109.6 . . ?
C1 C3 H3D 109.6 3_766 . ?
H3C C3 H3D 108.2 . . ?
N3 C4 C9 110.1(3) . . ?
N3 C4 H4C 109.6 . . ?
C9 C4 H4C 109.6 . . ?
N3 C4 H4D 109.6 . . ?
C9 C4 H4D 109.6 . . ?
H4C C4 H4D 108.2 . . ?
N1 C5 C7 110.7(3) . . ?
N1 C5 H5C 109.5 . . ?
C7 C5 H5C 109.5 . . ?
N1 C5 H5D 109.5 . . ?
C7 C5 H5D 109.5 . . ?
H5C C5 H5D 108.1 . . ?
N2 C6 C2 110.3(3) . 3_756 ?
N2 C6 H6C 109.6 . . ?
C2 C6 H6C 109.6 3_756 . ?
N2 C6 H6D 109.6 . . ?
C2 C6 H6D 109.6 3_756 . ?
H6C C6 H6D 108.1 . . ?
N3 C7 C5 110.6(3) . . ?
N3 C7 H7A 109.5 . . ?
C5 C7 H7A 109.5 . . ?
N3 C7 H7B 109.5 . . ?
C5 C7 H7B 109.5 . . ?
H7A C7 H7B 108.1 . . ?
N5 C8 C12 110.3(3) . . ?
N5 C8 H8A 109.6 . . ?
C12 C8 H8A 109.6 . . ?
N5 C8 H8B 109.6 . . ?
C12 C8 H8B 109.6 . . ?
H8A C8 H8B 108.1 . . ?
N1 C9 C4 110.6(3) . . ?
N1 C9 H9A 109.5 . . ?
C4 C9 H9A 109.5 . . ?
N1 C9 H9B 109.5 . . ?
C4 C9 H9B 109.5 . . ?
H9A C9 H9B 108.1 . . ?
N5 C10 C11 109.6(4) . . ?
N5 C10 H10A 109.7 . . ?
C11 C10 H10A 109.7 . . ?
N5 C10 H10B 109.7 . . ?
C11 C10 H10B 109.7 . . ?
H10A C10 H10B 108.2 . . ?
N6 C11 C10 110.9(4) . . ?
N6 C11 H11A 109.4 . . ?
C10 C11 H11A 109.4 . . ?
N6 C11 H11B 109.4 . . ?
C10 C11 H11B 109.4 . . ?
H11A C11 H11B 108.0 . . ?
N6 C12 C8 110.1(3) . . ?
N6 C12 H12A 109.6 . . ?
C8 C12 H12A 109.6 . . ?
N6 C12 H12B 109.6 . . ?
C8 C12 H12B 109.6 . . ?
H12A C12 H12B 108.1 . . ?
 
_refine_diff_density_max    0.646
_refine_diff_density_min   -0.555
_refine_diff_density_rms    0.092

_shelx_res_file
;
TITL shelxt_a.res in P2/c
    shelx.res
    created by SHELXL-2018/3 at 15:35:48 on 20-Oct-2020
CELL  0.71075  16.9178  13.6023  12.8848   90.000  108.530   90.000
ZERR     4.00   0.0013   0.0010   0.0010    0.000    0.003    0.000
LATT   1
SYMM  - X,   Y, 1/2 - Z
SFAC  FE   F    C    N    O    H
UNIT  16  72   48   24    8   160
MERG   2
OMIT    -3.00  50.00
OMIT 1 0 0
OMIT 0 1 0
FMAP   2
PLAN    8
ACTA
BOND   $H
LIST   4
L.S.  20
WGHT    0.052600
FVAR       0.21450   0.50259
FE1   1    0.902648    0.278355    0.699339    11.00000    0.01107    0.01306 =
         0.01158   -0.00033    0.00158    0.00038
FE3   1    0.557655    0.244341    0.405082    11.00000    0.01157    0.01431 =
         0.01313    0.00015    0.00164   -0.00008
FE2   1    0.779748    0.246178    0.396451    11.00000    0.01037    0.01424 =
         0.01187    0.00021    0.00124   -0.00036
FE4   1    0.881361    0.223405    0.232266    11.00000    0.01466    0.01518 =
         0.01705    0.00008    0.00539    0.00034
F1    2    0.992771    0.270326    0.843700    11.00000    0.01348    0.02017 =
         0.01213    0.00015    0.00345    0.00085
F2    2    0.911497    0.414807    0.687695    11.00000    0.01822    0.01301 =
         0.02209    0.00101    0.00291   -0.00020
F3    2    0.815612    0.285462    0.759953    11.00000    0.01856    0.02378 =
         0.02082    0.00414    0.00743    0.00283
F4    2    0.899732    0.138033    0.696191    11.00000    0.01431    0.01439 =
         0.01886   -0.00152    0.00409   -0.00134
F5    2    0.819197    0.275823    0.552219    11.00000    0.01906    0.02865 =
         0.01365   -0.00124   -0.00008   -0.00013
F6    2    0.658966    0.244112    0.360829    11.00000    0.01076    0.02963 =
         0.03188    0.00289    0.00562   -0.00094
F7    2    0.500000    0.279599    0.250000    10.50000    0.02030    0.01951 =
         0.01568    0.00000   -0.00184    0.00000
F8    2    0.542225    0.107481    0.370271    11.00000    0.01704    0.01393 =
         0.02693   -0.00004    0.00516   -0.00180
F9    2    0.452368    0.247683    0.430495    11.00000    0.01922    0.02209 =
         0.03357    0.00519    0.01274    0.00355
F10   2    0.572493    0.381307    0.438682    11.00000    0.02631    0.01523 =
         0.02338   -0.00235   -0.00024   -0.00104
F11   2    0.621026    0.215739    0.553215    11.00000    0.03087    0.02260 =
         0.01671    0.00262   -0.00254    0.00410
F12   2    0.768209    0.381901    0.366498    11.00000    0.02050    0.01474 =
         0.02197    0.00103    0.00161   -0.00158
F13   2    0.775952    0.113179    0.423015    11.00000    0.02722    0.01623 =
         0.03617    0.00460    0.01010   -0.00048
F14   2    0.762778    0.221448    0.236515    11.00000    0.01337    0.02274 =
         0.01451   -0.00206    0.00201    0.00138
F15   2    0.894868    0.242805    0.391419    11.00000    0.01034    0.02559 =
         0.01571   -0.00095    0.00291   -0.00061
F16   2    0.882114    0.361063    0.220507    11.00000    0.02670    0.01501 =
         0.02098   -0.00070    0.00777   -0.00159
F17   2    1.000000    0.223157    0.250000    10.50000    0.01597    0.03681 =
         0.04734    0.00000    0.01354    0.00000
F18   2    0.844234    0.207038    0.079902    11.00000    0.03573    0.02888 =
         0.01951   -0.00194    0.00921    0.00237
F19   2    0.889312    0.085962    0.259053    11.00000    0.02287    0.01704 =
         0.02370   -0.00032    0.00430    0.00289
N1    4    0.380268    0.062131    0.315654    11.00000    0.01756    0.02690 =
         0.02846    0.00942    0.00426   -0.00249
AFIX  23  0.9800
H1A   6    0.342192    0.114290    0.277273    11.00000   -1.20000
H1B   6    0.437301    0.082727    0.322999    11.00000   -1.20000
AFIX   0
N2    4    0.996064   -0.040657    0.396256    11.00000    0.02333    0.02148 =
         0.01507   -0.00112    0.00524    0.00562
AFIX  23  0.9800
H2A   6    0.956449    0.003989    0.346093    11.00000   -1.20000
H2B   6    1.013407   -0.089804    0.352242    11.00000   -1.20000
AFIX   0
N3    4    0.265473   -0.079893    0.352667    11.00000    0.01757    0.02037 =
         0.02852    0.00991    0.00263   -0.00224
AFIX  23  0.9800
H3A   6    0.208430   -0.100291    0.345539    11.00000   -1.20000
H3B   6    0.303406   -0.132324    0.390652    11.00000   -1.20000
AFIX   0
N4    4    0.974514    0.476102    0.385165    11.00000    0.02562    0.02007 =
         0.01188   -0.00250    0.00244   -0.00571
AFIX  23  0.9800
H4A   6    0.941492    0.436323    0.323103    11.00000   -1.20000
H4B   6    1.006290    0.524135    0.357821    11.00000   -1.20000
AFIX   0
N5    4    0.643835    0.601092    0.672357    11.00000    0.03020    0.02051 =
         0.03478   -0.01125   -0.01047    0.01045
AFIX  23  0.9800
H5A   6    0.605648    0.657297    0.654416    11.00000   -1.20000
H5B   6    0.691657    0.619213    0.735607    11.00000   -1.20000
AFIX   0
N6    4    0.689818    0.406222    0.633691    11.00000    0.02227    0.02116 =
         0.04573   -0.01539   -0.00621    0.00500
AFIX  23  0.9800
H6A   6    0.729416    0.351462    0.653767    11.00000   -1.20000
H6B   6    0.643071    0.385777    0.570229    11.00000   -1.20000
AFIX   0
C1    3    0.917743    0.528652    0.434243    11.00000    0.01791    0.02218 =
         0.02001    0.00323    0.00095   -0.00293
AFIX  23  0.9800
H1C   6    0.883066    0.480746    0.456699    11.00000   -1.20000
H1D   6    0.880775    0.572181    0.379383    11.00000   -1.20000
AFIX   0
C2    3    0.954413   -0.090725    0.467247    11.00000    0.02177    0.01939 =
         0.02151    0.00013    0.00288   -0.00039
AFIX  23  0.9800
H2C   6    0.992446   -0.139009    0.513854    11.00000   -1.20000
H2D   6    0.904840   -0.125655    0.421737    11.00000   -1.20000
AFIX   0
C3    3    1.033036    0.411492    0.467630    11.00000    0.02606    0.01734 =
         0.01923   -0.00055    0.00818    0.00049
AFIX  23  0.9800
H3C   6    1.071286    0.379432    0.434890    11.00000   -1.20000
H3D   6    1.001593    0.360209    0.490863    11.00000   -1.20000
AFIX   0
C4    3    0.273308   -0.065143    0.241585    11.00000    0.02502    0.03358 =
         0.02250    0.00144    0.00131   -0.00803
AFIX  23  0.9800
H4C   6    0.232316   -0.016470    0.201238    11.00000   -1.20000
H4D   6    0.261898   -0.127158    0.200812    11.00000   -1.20000
AFIX   0
C5    3    0.371985    0.047150    0.427107    11.00000    0.02521    0.02656 =
         0.02405    0.00128    0.00491   -0.00442
AFIX  23  0.9800
H5C   6    0.383394    0.109161    0.467888    11.00000   -1.20000
H5D   6    0.413035   -0.001447    0.467497    11.00000   -1.20000
AFIX   0
C6    3    1.070423    0.016211    0.462468    11.00000    0.01715    0.02365 =
         0.02351    0.00159    0.00935    0.00199
AFIX  23  0.9800
H6C   6    1.095728    0.049802    0.413573    11.00000   -1.20000
H6D   6    1.111898   -0.028849    0.509030    11.00000   -1.20000
AFIX   0
C7    3    0.285676    0.012178    0.418205    11.00000    0.02447    0.02311 =
         0.03143    0.00488    0.01126   -0.00142
AFIX  23  0.9800
H7A   6    0.282134    0.000213    0.491599    11.00000   -1.20000
H7B   6    0.244986    0.063177    0.383335    11.00000   -1.20000
AFIX   0
C8    3    0.673039    0.579284    0.578177    11.00000    0.02863    0.03293 =
         0.03685    0.00434   -0.00143    0.00520
AFIX  23  0.9800
H8A   6    0.701965    0.636787    0.561911    11.00000   -1.20000
H8B   6    0.625085    0.565011    0.513516    11.00000   -1.20000
AFIX   0
C9    3    0.360601   -0.029930    0.251262    11.00000    0.03315    0.03872 =
         0.02506   -0.00341    0.01089   -0.00874
AFIX  23  0.9800
H9A   6    0.401207   -0.080739    0.286976    11.00000   -1.20000
H9B   6    0.364645   -0.018562    0.178013    11.00000   -1.20000
AFIX   0
C10   3    0.600670    0.515715    0.701372    11.00000    0.02613    0.04448 =
         0.04097   -0.00520    0.00839    0.00882
AFIX  23  0.9800
H10A  6    0.550482    0.500117    0.640306    11.00000   -1.20000
H10B  6    0.583676    0.531736    0.765352    11.00000   -1.20000
AFIX   0
C11   3    0.658447    0.428043    0.726534    11.00000    0.02938    0.03145 =
         0.04588    0.00573    0.00171    0.00318
AFIX  23  0.9800
H11A  6    0.705666    0.441432    0.792383    11.00000   -1.20000
H11B  6    0.628623    0.370619    0.741131    11.00000   -1.20000
AFIX   0
C12   3    0.731344    0.492272    0.603313    11.00000    0.02241    0.03605 =
         0.04350   -0.00518    0.00554    0.00434
AFIX  23  0.9800
H12A  6    0.747955    0.476307    0.539018    11.00000   -1.20000
H12B  6    0.781713    0.508685    0.663733    11.00000   -1.20000
AFIX   0
PART    1
O1S   5    0.707003    0.209454   -0.055106    21.00000    0.04624    0.05500 =
         0.02931    0.00098    0.01232   -0.00153
PART    2
O1S'  5    0.730811    0.268526   -0.081351   -21.00000    0.08053    0.16017 =
         0.04270   -0.01508    0.00837    0.07378
PART 0
PART    1
O2S   5    0.478538    0.322841    0.644979    21.00000    0.05781    0.05018 =
         0.03689    0.00791    0.00258    0.01335
PART    2
O2S'  5    0.451419    0.234689    0.655867   -21.00000    0.13995    0.09447 =
         0.08100    0.00904    0.07163   -0.01098
PART 0
HKLF    4


REM  shelxt_a.res in P2/c
REM wR2 = 0.0913, GooF = S = 1.006, Restrained GooF = 1.006 for all data
REM R1 = 0.0331 for 3648 Fo > 4sig(Fo) and 0.0524 for all 4952 data
REM 399 parameters refined using 0 restraints

END

WGHT      0.0533      0.0000

REM Highest difference peak  0.646,  deepest hole -0.555,  1-sigma level  0.092
Q1    1   0.4761  0.2393  0.7138  11.00000  0.05    0.65
Q2    1   0.4358  0.2778  0.6365  11.00000  0.05    0.56
Q3    1   0.8814  0.2946  0.2360  11.00000  0.05    0.56
Q4    1   0.3937  0.2261  0.6474  11.00000  0.05    0.52
Q5    1   0.7768  0.2429 -0.0269  11.00000  0.05    0.51
Q6    1   0.9031  0.2069  0.7012  11.00000  0.05    0.48
Q7    1   0.4595  0.2669  0.5784  11.00000  0.05    0.48
Q8    1   0.6616  0.2767  0.6643  11.00000  0.05    0.43
;
_shelx_res_checksum   94625

_shelx_hkl_file
;
   1   0   0   -1.66    1.78
  -1   0   0    0.00    3.13
   1   0   0   -0.04    2.40
  -1   0   0   -5.11    3.70
  -2   0   0   39.57    5.09
   2   0   0   40.79    5.35
   2   0   0   36.94    8.34
  -2   0   0   37.44    8.44
   3   0   0  164.93    8.57
   3   0   0  178.47    8.62
  -3   0   0  192.05    8.67
   4   0   0  353.87   11.63
  -4   0   0  416.11   13.88
   5   0   0  269.40    9.57
   5   0   0  280.50   10.84
  -5   0   0  279.36   10.29
   6   0   0 1961.99   41.65
   6   0   0 2197.85   46.79
  -6   0   0 2245.99   47.18
   7   0   0   21.06    3.77
   7   0   0   13.56    5.24
  -7   0   0   19.10    4.89
   8   0   0  581.61   16.17
   8   0   0  663.49   20.13
  -8   0   0  658.70   18.77
   9   0   0 5606.74   83.67
  -9   0   0 5743.23   51.18
  10   0   0  298.14   10.50
  10   0   0  346.16   13.15
 -10   0   0  333.29   12.01
  11   0   0  869.74   28.06
 -11   0   0  868.94   26.02
  12   0   0  113.22    8.49
 -12   0   0  129.46    9.67
  13   0   0   -0.41    7.68
 -13   0   0   -0.01    5.50
  14   0   0   28.01    9.62
 -14   0   0   26.66    8.65
  15   0   0  579.91   32.22
 -15   0   0  466.82   25.70
  16   0   0   15.92   12.03
 -16   0   0    4.91    6.87
  17   0   0    5.05    9.05
 -17   0   0   -2.95   10.50
  18   0   0  694.88   25.71
 -18   0   0  687.59   31.76
  19   0   0   -1.31   11.19
 -19   0   0    6.41    9.11
  20   0   0    1.30   12.78
 -20   0   0   16.53   12.33
   0  -1   0   -0.65    3.41
   0   1   0    4.22    4.50
   0  -1   0    3.40    2.82
   0   1   0    0.52    2.35
   0   1   0    1.16    3.67
   0  -1   0    0.08    3.99
   1  -1   0    0.38    3.70
  -1   1   0    0.54    4.02
  -1  -1   0    3.18    4.09
   1   1   0    4.02    5.36
   1   1   0    1.81    4.71
  -1  -1   0   -4.06    4.49
   1  -1   0    2.58    5.45
  -1   1   0    1.18    5.76
   1  -1   0   -1.82    6.38
   1   1   0    4.62    4.78
  -1  -1   0    3.71    5.80
  -2   1   0   19.19    5.12
   2  -1   0   15.27    4.37
   2   1   0   19.72    6.04
  -2  -1   0   17.80    5.33
   2   1   0   25.00    8.32
   2  -1   0   18.92    5.05
  -2  -1   0   23.09    4.83
  -2   1   0   13.88    4.23
  -3   1   0   26.03    5.95
   3  -1   0   21.12    4.72
   3   1   0   26.51    6.92
   3   1   0   26.27    5.57
   3  -1   0   27.07    5.58
  -3  -1   0   27.27    5.18
  -3   1   0   26.94    5.09
  -4   1   0   10.80    6.28
   4  -1   0    6.22    4.42
   4   1   0   18.24    4.32
   4   1   0   16.38    5.90
   4  -1   0   12.99    5.21
  -4  -1   0   13.98    5.70
  -4   1   0   16.94    5.52
  -5   1   0    0.63    5.38
   5   1   0    8.41    3.51
   5   1   0    7.52    4.71
   5  -1   0    5.87    4.99
  -5  -1   0   11.28    4.98
  -5   1   0    4.68    5.77
  -6   1   0   28.16    6.11
   6   1   0   35.32    4.54
   6   1   0   35.63    5.75
   6  -1   0   33.67    6.05
  -6  -1   0   31.72    5.82
  -6   1   0   41.13    5.35
  -7   1   0   16.29    5.93
   7   1   0   12.01    3.64
   7   1   0    8.06    5.67
   7  -1   0   18.13    6.31
  -7  -1   0    9.69    5.87
  -7   1   0   11.89    5.39
   8   1   0  237.35    9.28
   8   1   0  213.79   10.52
   8  -1   0  224.13   10.04
  -8  -1   0  250.53   10.09
  -8   1   0  241.53    9.74
   9   1   0   22.98    5.13
   9   1   0   21.20    6.54
   9  -1   0   15.49    7.32
  -9  -1   0   24.32    6.03
  -9   1   0   33.06    6.92
  10   1   0   12.68    4.14
  10   1   0   13.53    5.82
  10  -1   0   13.47    6.78
 -10  -1   0   12.02    4.73
 -10   1   0    7.91    5.47
  11   1   0   63.27    6.05
  11   1   0   51.44    8.35
  11  -1   0   62.17    8.62
 -11  -1   0   63.37    7.30
 -11   1   0   70.45    7.49
  12   1   0  209.28   11.21
  12  -1   0  203.94   10.16
 -12  -1   0  210.83   10.84
 -12   1   0  190.66    9.07
  13   1   0   17.78   10.02
  13  -1   0   17.76    9.35
 -13  -1   0   17.95    8.05
 -13   1   0    7.14    7.68
  14   1   0   -1.27   10.58
  14  -1   0    5.66    7.85
 -14  -1   0   11.35    8.78
 -14   1   0    1.78    7.24
  15   1   0   11.44    7.92
  15  -1   0   11.21   11.72
 -15  -1   0   -3.17    8.77
 -15   1   0    8.88    6.55
  16   1   0   14.29   10.56
  16  -1   0   21.68    8.54
 -16  -1   0    8.14    7.56
 -16   1   0    6.95    9.16
  17   1   0   20.37   11.15
  17  -1   0    0.32   11.07
 -17  -1   0   10.81    9.23
 -17   1   0   15.82    8.79
  18   1   0   56.56   13.18
  18  -1   0   61.62   13.59
 -18  -1   0   53.34    8.59
 -18   1   0   34.07    9.00
  19   1   0   24.51   10.61
  19  -1   0   27.85   14.00
 -19  -1   0   19.71    9.68
 -19   1   0   22.08    9.33
  20   1   0   -3.01   12.66
  20  -1   0   -0.97   15.32
 -20  -1   0  -12.56   11.34
 -20   1   0    9.58    9.57
  -1   2   0   72.53    6.25
   1   2   0   69.07    6.22
   1   2   0   70.41    7.79
  -1  -2   0   59.59    7.42
   1  -2   0   76.70    8.38
   1  -2   0   71.21    7.30
  -1  -2   0   69.44    6.28
  -2   2   0   13.12    8.57
   2   2   0   10.41    4.86
   2   2   0   14.10    8.83
   2  -2   0   14.27    4.86
   2  -2   0    9.38    5.44
  -2  -2   0   13.89    4.71
  -3  -2   0 5936.49   69.44
  -4   2   0   72.97    8.83
   4   2   0   80.91    6.09
   4   2   0   94.09    8.54
   4  -2   0   80.40    7.37
  -4  -2   0   79.92    6.64
  -4   2   0   89.71    6.77
  -5   2   0    0.02    6.39
   5   2   0    1.67    4.00
   5   2   0   -3.32    5.10
   5  -2   0   -0.04    4.62
  -5  -2   0    0.11    5.40
  -5   2   0    1.00    5.28
  -6   2   0   56.80    7.73
   6   2   0   56.46    5.23
   6   2   0   56.63    7.30
   6  -2   0   49.97    5.72
  -6  -2   0   69.43    6.85
  -6   2   0   56.17    5.95
  -7   2   0   -1.22    6.80
   7   2   0    5.02    3.95
   7   2   0   10.01    5.14
   7  -2   0   11.46    6.87
  -7  -2   0    5.52    5.97
  -7   2   0    6.55    4.93
  -8   2   0    0.30    3.78
   8   2   0    1.25    4.08
   8   2   0    0.65    5.59
   8  -2   0    2.40    5.93
  -8  -2   0    8.61    5.20
  -8   2   0   -3.19    4.81
   9   2   0 3379.57   54.87
   9   2   0 3372.48   63.39
   9  -2   0 3473.18   52.19
  -9   2   0 3384.52   48.43
  10   2   0  112.57    7.16
  10   2   0  117.03   10.04
  10  -2   0  107.06    7.61
 -10  -2   0  101.65    7.35
 -10   2   0   98.69    6.98
  11   2   0   62.73    5.95
  11   2   0   63.34    9.10
  11  -2   0   68.01    9.04
 -11  -2   0   59.66    6.87
 -11   2   0   70.29    7.75
  12   2   0   65.18    6.24
  12   2   0   73.71    8.25
  12  -2   0   60.81    9.74
 -12  -2   0   71.28    8.30
 -12   2   0   62.41    9.11
  13   2   0    7.54    6.30
  13  -2   0    2.67    8.44
 -13  -2   0    3.83    6.66
 -13   2   0    8.81    8.20
  14   2   0   15.68    6.98
  14  -2   0   14.77    7.26
 -14  -2   0   13.01    5.56
 -14   2   0    9.50    9.16
  15   2   0  347.87   14.77
  15  -2   0  320.48   16.11
 -15  -2   0  355.23   14.65
 -15   2   0  348.34   14.86
  16   2   0    9.74    7.58
  16  -2   0   12.46    7.61
 -16  -2   0    0.54    7.97
 -16   2   0   12.41    8.80
  17   2   0    2.41   10.55
  17  -2   0  -13.31   12.22
 -17  -2   0    4.33    9.74
 -17   2   0   -3.23    7.72
  18   2   0  523.85   29.68
  18  -2   0  547.43   29.99
 -18  -2   0  532.16   25.65
 -18   2   0  435.21   27.26
  19   2   0   -4.14   14.93
  19  -2   0   -0.44   10.10
 -19  -2   0    9.32   10.41
 -19   2   0   14.51   13.27
  20   2   0   25.68   10.92
  20  -2   0   29.16   14.48
 -20  -2   0   34.43   11.28
 -20   2   0   22.36   10.76
   0   3   0    9.74    5.08
   0  -3   0   16.24    7.44
   0  -3   0   15.97    5.44
  -1   3   0    7.84    5.09
   1   3   0   12.99    5.44
   1  -3   0    8.02    4.25
  -1  -3   0   12.78    6.22
   1  -3   0   11.63    6.03
  -1  -3   0    6.83    5.06
  -2   3   0    5.38    4.75
   2   3   0    3.82    4.73
   2   3   0    7.45    8.97
   2  -3   0    4.39    4.79
   2  -3   0    1.73    5.90
  -2  -3   0    6.88    5.28
  -3   3   0   36.35    5.20
   3   3   0   34.76    5.67
   3   3   0   27.02    6.21
   3  -3   0   30.67    5.59
   3  -3   0   33.23    7.28
  -3  -3   0   32.89    6.21
  -4   3   0    1.15    3.93
   4   3   0    8.31    4.19
   4   3   0   -1.99    5.31
   4  -3   0    2.85    5.53
  -4  -3   0    5.50    4.42
  -5   3   0    1.32    3.71
   5   3   0   -3.71    4.21
   5   3   0   -2.62    5.67
   5  -3   0   -3.83    5.21
  -5  -3   0   -0.14    4.74
  -5   3   0   -5.43    4.68
  -6   3   0   41.48    5.62
   6   3   0   50.60    5.64
   6   3   0   59.40    6.64
   6  -3   0   42.75    6.59
  -6  -3   0   64.84    6.55
  -6   3   0   48.74    5.99
  -7   3   0   58.80    5.66
   7   3   0   64.45    5.66
   7   3   0   72.92    7.43
   7  -3   0   75.10    7.62
  -7  -3   0   70.81    6.77
  -7   3   0   63.90    6.38
  -8   3   0   23.69    4.87
   8   3   0   19.69    4.47
   8   3   0   28.71    7.05
   8  -3   0   22.41    6.32
  -8  -3   0   24.39    5.36
  -8   3   0   25.02    5.71
  -9   3   0   33.69    5.32
   9   3   0   35.92    5.00
   9   3   0   40.61    6.32
   9  -3   0   36.20    6.58
  -9  -3   0   39.34    6.08
  -9   3   0   38.65    7.58
  10   3   0   61.66    6.15
  10   3   0   75.38    8.02
  10  -3   0   67.12    8.65
 -10  -3   0   57.87    8.32
 -10   3   0   49.03    6.10
  11   3   0   83.23    7.00
  11   3   0   87.60    7.46
  11  -3   0   96.58    9.64
 -11  -3   0   89.22    8.58
 -11   3   0   78.09    8.41
  12   3   0   35.81    5.31
  12   3   0   70.96    9.52
  12  -3   0   65.92    9.02
 -12  -3   0   68.42    7.87
 -12   3   0   77.81    8.22
  13   3   0    4.80    5.06
  13   3   0    3.38    7.19
  13  -3   0    4.25    8.27
 -13  -3   0   -0.94    8.00
 -13   3   0    7.53    7.42
  14   3   0   19.07   10.01
  14  -3   0   11.32    6.95
 -14  -3   0   18.14    6.74
 -14   3   0   12.22    6.37
  15   3   0   10.72   11.57
  15  -3   0    6.38   10.32
 -15  -3   0    1.58    8.74
 -15   3   0    9.51    6.69
  16   3   0    8.80   10.87
  16  -3   0   15.30   11.66
 -16  -3   0    0.80    8.90
 -16   3   0    1.90    6.36
  17   3   0   12.76   11.57
  17  -3   0   -2.14    9.79
 -17  -3   0   -1.39    7.69
 -17   3   0   -1.83    7.35
  18   3   0    3.75   11.63
  18  -3   0   18.06   12.36
 -18  -3   0    9.82    7.15
 -18   3   0    4.19    8.97
  19   3   0   -4.87   14.66
  19  -3   0   -6.66   13.02
 -19  -3   0   -5.25    9.74
 -19   3   0   -5.38   10.45
  20   3   0   -7.65   15.66
  20  -3   0   -2.58   10.76
 -20  -3   0    1.73    9.30
 -20   3   0   -2.03   11.97
  -1   4   0  101.46    7.96
   1   4   0   84.93    7.69
   1  -4   0   85.37    6.17
  -1  -4   0   88.18    6.10
   1  -4   0  101.50    8.11
  -1  -4   0   85.40    6.94
  -2   4   0   76.89    7.40
   2   4   0   67.88    6.59
   2  -4   0   71.05    6.40
  -2  -4   0   71.01    5.65
   2  -4   0   65.47    7.93
  -2  -4   0   60.55    7.15
  -3   4   0  318.47   11.91
   3   4   0  335.24   11.49
   3   4   0  338.50   12.22
   3  -4   0  318.90   10.94
   3  -4   0  344.57   12.93
  -3  -4   0  337.04   11.58
  -4   4   0    2.83    4.40
   4   4   0   -0.04    4.53
   4   4   0    2.25    4.91
   4  -4   0    1.97    4.59
   4  -4   0    0.12    5.66
  -4  -4   0   -1.10    3.97
  -5   4   0  119.43    7.31
   5   4   0  115.59    6.64
   5   4   0  107.32    8.57
   5  -4   0  127.89    7.93
  -5  -4   0  109.48    7.01
  -6   4   0   49.13    5.30
   6   4   0   53.65    5.50
   6   4   0   49.62    6.91
   6  -4   0   49.38    6.10
  -6  -4   0   50.66    6.29
  -6   4   0   50.24    6.19
  -7   4   0   30.46    4.98
   7   4   0   32.18    5.70
   7   4   0   27.95    6.96
   7  -4   0   25.47    5.45
  -7  -4   0   26.64    6.29
  -7   4   0   28.45    5.38
  -8   4   0   10.37    4.70
   8   4   0    9.23    4.13
   8   4   0    9.23    5.79
   8  -4   0   11.83    6.78
  -8  -4   0   13.54    6.83
  -8   4   0   13.79    5.75
   9   4   0  717.48   18.59
   9   4   0  723.50   22.81
   9  -4   0  758.51   19.99
  -9  -4   0  752.18   17.69
  -9   4   0  752.55   18.65
 -10   4   0   48.37    6.35
  10   4   0   70.53    6.68
  10   4   0   67.44    8.71
  10  -4   0   66.04    8.54
 -10  -4   0   75.14    7.39
 -10   4   0   61.89    6.93
  11   4   0  306.79   13.77
  11   4   0  288.64   12.99
  11  -4   0  282.91   13.53
 -11  -4   0  325.89   13.58
 -11   4   0  301.15   13.07
  12   4   0   36.94    5.84
  12   4   0   23.54    8.61
  12  -4   0   42.96    8.74
 -12  -4   0   36.88    6.93
 -12   4   0   43.37    7.34
  13   4   0    5.56    5.52
  13   4   0   -0.32    8.59
  13  -4   0   -3.17    9.05
 -13  -4   0    5.28    7.03
 -13   4   0    3.29    6.08
  14   4   0   33.95    7.16
  14  -4   0   30.33   11.00
 -14  -4   0   30.10    8.85
 -14   4   0   31.74    8.22
  15   4   0   20.82   10.20
  15  -4   0   31.78    8.31
 -15  -4   0   29.54    8.83
 -15   4   0   40.15    9.65
  16   4   0    1.06    8.97
  16  -4   0    1.46    9.11
 -16  -4   0    1.18    8.23
 -16   4   0   13.38    7.28
  17   4   0    5.85   10.55
  17  -4   0   16.05   11.38
 -17  -4   0   18.34    9.94
 -17   4   0   15.00    6.98
  18   4   0  362.42   21.47
  18  -4   0  374.06   20.06
 -18  -4   0  369.73   17.51
 -18   4   0  403.07   18.77
  19   4   0   11.34   13.45
  19  -4   0   23.49   10.17
 -19  -4   0   19.45    9.05
 -19   4   0   19.52    9.42
  20   4   0   22.48   15.38
  20  -4   0    8.23   11.42
 -20  -4   0    3.32   13.15
 -20   4   0    3.47   11.84
   0   5   0  140.69    7.95
   0  -5   0  140.41    7.83
   0  -5   0  140.82    8.61
  -1   5   0  126.97    8.27
   1   5   0  115.93    7.48
   1  -5   0  112.81    6.82
  -1  -5   0  118.20    6.68
   1  -5   0  128.94    8.75
  -1  -5   0  121.12    7.82
  -2   5   0  178.62    8.92
   2   5   0  155.94    7.56
   2  -5   0  150.44    7.80
  -2  -5   0  153.56    7.28
   2  -5   0  173.92   10.18
  -2  -5   0  142.98    7.73
  -3   5   0  320.42   12.13
   3   5   0  332.15   10.94
   3   5   0  293.46   12.24
   3  -5   0  318.62   11.22
   3  -5   0  373.02   14.53
  -3  -5   0  298.75   10.37
  -4   5   0  327.21   14.26
   4   5   0  372.38   11.50
   4   5   0  406.79   15.29
   4  -5   0  377.16   13.77
   4  -5   0  366.05   14.07
  -4  -5   0  383.77   13.46
  -5   5   0   -2.26    3.75
   5   5   0    4.42    4.42
   5   5   0   -2.98    5.10
   5  -5   0    0.57    5.78
   5  -5   0    0.76    7.05
  -5  -5   0    2.35    4.57
  -6   5   0   25.46    6.11
   6   5   0   15.41    6.12
   6   5   0   23.68    7.22
   6  -5   0   25.54    5.78
  -6  -5   0   20.79    5.01
  -6   5   0   24.70    5.59
  -7   5   0   45.36    5.56
   7   5   0   60.58    5.97
   7   5   0   57.48    7.49
   7  -5   0   55.49    7.56
  -7  -5   0   64.83    6.56
  -7   5   0   58.02    6.24
  -8   5   0   16.17    5.26
   8   5   0   19.31    5.33
   8   5   0   16.99    5.50
   8  -5   0   16.25    6.41
  -8  -5   0   17.91    5.74
  -8   5   0   18.56    5.57
  -9   5   0   89.03    7.33
   9   5   0   95.72    8.09
   9   5   0   99.52    8.68
   9  -5   0  118.00   10.03
  -9  -5   0   93.34    7.29
  -9   5   0   98.57    7.94
  10   5   0  202.42   10.75
  10   5   0  202.07   11.68
  10  -5   0  172.90    9.09
 -10  -5   0  185.52   10.37
 -10   5   0  188.81    9.77
  11   5   0  293.01   15.32
  11   5   0  325.24   14.85
  11  -5   0  323.87   15.29
 -11  -5   0  342.58   14.66
 -11   5   0  344.68   16.09
  12   5   0   48.28    6.90
  12   5   0   56.50    9.82
  12  -5   0   57.48    9.12
 -12  -5   0   55.93    9.00
 -12   5   0   64.04    9.11
  13   5   0    7.82    6.41
  13   5   0   12.54    7.17
  13  -5   0   15.46    7.47
 -13  -5   0   13.58    6.23
 -13   5   0   12.27    9.58
  14   5   0   95.49    8.57
  14   5   0  112.54   11.98
  14  -5   0  133.39   11.21
 -14  -5   0  133.82   11.39
 -14   5   0  129.73   10.22
  15   5   0  -10.88   11.40
  15  -5   0    0.87    7.32
 -15  -5   0   -9.81    8.00
 -15   5   0   10.21   10.61
  16   5   0   81.32    9.74
  16  -5   0  105.96   12.88
 -16  -5   0   91.83    9.28
 -16   5   0  109.17   11.23
  17   5   0   67.71   13.59
  17  -5   0   48.44   11.76
 -17  -5   0   55.74    9.20
 -17   5   0   53.60   11.19
  18   5   0    2.71   11.67
  18  -5   0   -2.38   12.86
 -18  -5   0    5.31   10.05
 -18   5   0   -3.36    9.61
  19   5   0   15.83   13.02
  19  -5   0   19.18   10.04
 -19  -5   0    5.70    8.91
 -19   5   0   17.95    8.86
   0  -6   0 9999.00  114.78
  -1   6   0    6.48    5.95
   1   6   0    6.88    5.07
   1  -6   0    6.76    4.19
  -1  -6   0    9.36    3.84
   1  -6   0    3.95    6.21
  -1  -6   0   -0.30    4.61
  -2   6   0   -1.90    6.27
   2   6   0   -0.10    4.41
   2  -6   0   -3.53    3.28
  -2  -6   0    1.44    3.11
   2  -6   0    0.83    6.94
  -2  -6   0    0.60    6.03
  -3   6   0  214.05    9.70
   3   6   0  209.45    9.18
   3  -6   0  198.63    8.76
  -3  -6   0  206.32    8.62
   3  -6   0  215.24   11.19
  -3  -6   0  219.41   10.20
  -4   6   0   10.50    6.01
   4   6   0    8.63    4.69
   4   6   0    9.07    5.06
   4  -6   0    1.28    6.21
   4  -6   0    0.45    6.88
  -4  -6   0    4.37    6.00
  -5   6   0    3.35    5.54
   5   6   0    0.06    5.02
   5   6   0   -0.99    4.19
   5  -6   0   -2.28    5.61
   5  -6   0   -7.30    6.24
  -5  -6   0    2.90    5.82
  -6   6   0  244.78   12.19
   6   6   0  261.43   10.54
   6   6   0  238.77   12.15
   6  -6   0  260.15   11.02
   6  -6   0  228.43   11.00
  -6  -6   0  272.83   11.18
  -7   6   0   38.59    5.91
   7   6   0   40.38    6.39
   7   6   0   25.78    6.35
   7  -6   0   46.23    6.87
  -7  -6   0   34.30    5.91
  -7   6   0   39.15    6.66
  -8   6   0    5.56    5.07
   8   6   0   10.30    4.66
   8   6   0   13.46    6.67
   8  -6   0    6.14    5.01
  -8  -6   0   23.72    7.03
  -8   6   0   14.73    5.70
  -9   6   0 2089.11   60.40
   9   6   0 2432.18   43.97
   9   6   0 2427.55   47.67
   9  -6   0 2229.67   60.37
  -9  -6   0 2362.57   61.35
  -9   6   0 2401.12   37.08
 -10   6   0    3.80    5.34
  10   6   0    8.86    5.89
  10   6   0   -2.26    6.85
  10  -6   0    9.04    5.88
 -10  -6   0    4.52    5.09
 -10   6   0    4.48    6.78
  11   6   0   27.21    5.20
  11   6   0   57.95    8.72
  11  -6   0   61.74    7.54
 -11  -6   0   64.76    8.61
 -11   6   0   52.46    6.77
  12   6   0  104.05    8.71
  12   6   0   91.77    9.68
  12  -6   0  102.32    9.44
 -12  -6   0  102.53    8.19
 -12   6   0  111.23    9.70
  13   6   0    1.67    6.48
  13   6   0    3.36    8.67
  13  -6   0   -1.91    6.63
 -13  -6   0    1.44    7.95
 -13   6   0    1.00    7.97
  14   6   0    3.57    8.47
  14  -6   0    4.50    7.13
 -14  -6   0    1.42    6.27
 -14   6   0    6.24    7.95
  15   6   0  148.34   12.92
  15  -6   0  165.75   12.69
 -15  -6   0  173.22   13.56
 -15   6   0  160.44   11.36
  16   6   0    6.93   10.22
  16  -6   0   -2.65    9.80
 -16  -6   0   -4.95    9.81
 -16   6   0    9.14   10.07
  17   6   0   39.70   11.96
  17  -6   0   28.29   12.90
 -17  -6   0   33.14    8.09
 -17   6   0   33.05    8.64
  18   6   0  292.76   21.32
  18  -6   0  360.41   20.86
 -18  -6   0  380.07   20.90
 -18   6   0  340.75   20.77
  19   6   0    2.82   10.84
  19  -6   0    3.21    9.57
 -19  -6   0   -0.21   11.86
 -19   6   0   -5.38   11.87
   0   7   0  351.88   12.31
   0  -7   0  340.17   11.22
   0  -7   0  326.93   11.86
  -1   7   0  149.78    8.19
   1   7   0  151.36    8.46
   1  -7   0  154.59    8.36
  -1  -7   0  138.41    7.13
   1  -7   0  161.16   10.08
  -1  -7   0  149.01    8.66
  -2   7   0   59.78    6.97
   2   7   0   51.15    6.22
   2  -7   0   57.06    6.90
  -2  -7   0   50.45    5.06
   2  -7   0   54.22    7.05
  -2  -7   0   56.33    6.61
  -3   7   0   22.52    5.78
   3   7   0   32.26    6.44
   3  -7   0   25.77    5.01
  -3  -7   0   30.74    4.29
   3  -7   0   33.16    7.42
  -3  -7   0   32.22    5.98
  -4   7   0   11.91    5.40
   4   7   0   10.28    5.61
   4  -7   0   10.74    5.19
  -4  -7   0   10.58    4.03
   4  -7   0   15.64    6.11
  -4  -7   0   16.95    6.61
  -5   7   0  126.98    8.15
   5   7   0  134.56    8.90
   5   7   0  129.00    8.81
   5  -7   0  127.22    7.72
   5  -7   0  133.14   10.83
  -5  -7   0  120.51    7.55
  -6   7   0  108.19    7.85
   6   7   0  114.14    8.31
   6   7   0  115.69    9.19
   6  -7   0  120.52    8.75
   6  -7   0  116.27   10.94
  -6  -7   0  109.14    7.26
  -7   7   0  482.17   18.40
   7   7   0  465.66   17.52
   7   7   0  440.69   18.93
   7  -7   0  482.36   18.38
   7  -7   0  450.15   21.18
  -7  -7   0  496.34   17.58
  -8   7   0  541.76   20.24
   8   7   0  584.83   19.89
   8   7   0  578.12   22.55
   8  -7   0  616.79   21.48
  -8  -7   0  586.19   19.29
  -8   7   0  599.86   19.93
  -9   7   0   24.15    5.98
   9   7   0   27.77    7.34
   9   7   0   25.42    7.03
   9  -7   0   33.22    8.49
  -9  -7   0   38.00    9.24
  -9   7   0   24.94    6.42
 -10   7   0  198.29   11.10
  10   7   0  249.55   12.82
  10   7   0  254.99   14.51
  10  -7   0  250.76   12.95
 -10  -7   0  236.67   11.54
 -10   7   0  278.44   13.10
  11   7   0  283.84   12.96
  11   7   0  274.85   15.46
  11  -7   0  277.96   13.81
 -11  -7   0  272.82   12.61
 -11   7   0  261.15   11.09
  12   7   0  425.39   25.23
  12   7   0  361.96   23.51
  12  -7   0  452.23   27.15
 -12  -7   0  440.09   24.86
 -12   7   0  428.92   25.43
  13   7   0    5.82    8.01
  13   7   0    9.74    7.15
  13  -7   0   13.88   10.07
 -13  -7   0    7.92    9.40
 -13   7   0   12.78    8.22
  14   7   0    3.13    7.86
  14   7   0    6.41    9.64
  14  -7   0    5.53    9.82
 -14  -7   0    6.09    6.55
 -14   7   0   12.58    8.07
  15   7   0   18.95    9.22
  15  -7   0   39.62    9.65
 -15  -7   0   48.50   10.93
 -15   7   0   49.50   11.52
  16   7   0  116.78   10.69
  16  -7   0  148.25   12.96
 -16  -7   0  141.87   13.14
 -16   7   0  170.38   14.46
  17   7   0   30.92   10.70
  17  -7   0   30.15   10.07
 -17  -7   0   39.53   11.53
 -17   7   0   36.79   10.92
  18   7   0   69.74   14.02
  18  -7   0   77.34   14.88
 -18  -7   0   85.54   12.26
 -18   7   0   75.41   13.02
  19  -7   0    5.59   16.05
 -19  -7   0   -1.93   10.03
 -19   7   0    1.31   12.70
   0   8   0 3319.05   60.71
   0  -8   0 3276.14   59.37
   0  -8   0 3474.55   55.91
  -1   8   0   35.40    6.80
   1   8   0   42.92    7.29
   1  -8   0   31.55    4.86
  -1  -8   0   41.51    5.48
   1  -8   0   35.81    7.88
  -1  -8   0   45.31    8.87
  -2   8   0    3.09    6.35
   2   8   0    3.45    5.36
   2  -8   0   10.00    4.95
  -2  -8   0    1.77    3.96
   2  -8   0    5.87    7.53
  -2  -8   0    2.92    7.15
  -3   8   0  485.14   15.51
   3   8   0  489.60   15.10
   3  -8   0  455.33   14.42
  -3  -8   0  428.77   13.16
   3  -8   0  490.71   17.72
  -3  -8   0  515.44   15.60
  -4   8   0  134.61    9.07
   4   8   0  125.07    8.13
   4  -8   0  132.97    8.85
  -4  -8   0  120.14    7.27
   4  -8   0  145.81   11.20
  -4  -8   0  132.39    8.87
  -5   8   0   50.36    7.00
   5   8   0   48.46    6.09
   5  -8   0   53.82    7.28
  -5  -8   0   58.03    5.88
   5  -8   0   58.27    9.07
  -5  -8   0   59.50    7.41
  -6   8   0  536.48   21.42
   6   8   0  583.55   20.72
   6   8   0  553.92   26.73
   6  -8   0  579.61   21.34
   6  -8   0  509.54   24.02
  -6  -8   0  617.57   20.82
  -7   8   0   -4.94    5.74
   7   8   0    3.82    6.44
   7   8   0   -2.08    6.03
   7  -8   0   -1.48    7.10
   7  -8   0    0.67    8.51
  -7  -8   0   -3.00    6.24
  -8   8   0   71.03    7.42
   8   8   0   78.18    6.89
   8   8   0   62.71    7.26
   8  -8   0   76.83    7.66
  -8  -8   0   90.22    8.76
  -8   8   0   71.19    8.19
   9   8   0 1673.38   36.18
   9   8   0 1428.07   66.38
   9  -8   0 1708.38   34.90
  -9  -8   0 1508.75   44.01
 -10   8   0    5.77    6.75
  10   8   0   11.45    6.40
  10   8   0    8.11    6.77
  10  -8   0    7.19    8.34
 -10  -8   0   17.01    8.58
 -10   8   0   19.33    8.49
 -11   8   0   -2.21    4.62
  11   8   0    9.82    6.28
  11   8   0   -4.25    8.24
  11  -8   0   -4.85    6.45
 -11  -8   0    1.06    6.18
 -11   8   0    3.75    8.61
  12   8   0   94.07    9.38
  12   8   0   95.71   11.16
  12  -8   0   86.11    8.90
 -12  -8   0   79.25   10.50
 -12   8   0   99.14    9.30
  13   8   0   -0.62    6.93
  13   8   0    1.72    7.95
  13  -8   0    1.12    8.99
 -13  -8   0    5.75    8.71
 -13   8   0    5.86    8.88
  14   8   0   57.12    9.72
  14   8   0   30.85    8.98
  14  -8   0   54.06    8.59
 -14  -8   0   51.65    9.01
 -14   8   0   53.27    9.97
  15   8   0   90.36    9.63
  15   8   0   76.41   12.40
  15  -8   0   93.02   12.66
 -15  -8   0   99.35   10.67
 -15   8   0   99.38   12.00
  16   8   0   10.84   11.32
  16  -8   0   17.54   15.58
 -16  -8   0   20.02    9.25
 -16   8   0   18.85   11.29
  17  -8   0   -8.04   13.04
 -17  -8   0    0.91    7.52
 -17   8   0   -1.79   10.01
  18  -8   0  208.50   16.87
 -18  -8   0  221.61   11.81
 -18   8   0  237.07   14.85
   0   9   0    2.26    7.19
   0  -9   0    8.97    4.87
   0  -9   0    8.55    7.23
  -1   9   0   44.00    7.94
   1   9   0   28.03    6.75
   1  -9   0   36.21    5.48
  -1  -9   0   35.67    5.11
   1  -9   0   47.72    7.87
  -1  -9   0   33.69    7.49
  -2   9   0   12.56    6.61
   2   9   0    0.47    6.34
   2  -9   0    8.53    4.37
  -2  -9   0    9.28    4.08
   2  -9   0    9.07    6.51
  -2  -9   0    3.19    6.62
  -3   9   0   90.16    8.49
   3   9   0   86.23    7.20
   3  -9   0  106.28    8.43
  -3  -9   0   92.79    6.39
   3  -9   0   86.64    9.00
  -3  -9   0  112.89    9.23
  -4   9   0    1.14    5.14
   4   9   0    8.20    6.21
   4  -9   0    5.66    6.48
  -4  -9   0    2.80    3.52
   4  -9   0    0.00    7.15
  -4  -9   0    5.32    7.93
  -5   9   0   12.31    6.44
   5   9   0   18.26    5.47
   5  -9   0   21.26    6.79
  -5  -9   0   12.84    3.74
   5  -9   0   21.99    7.91
  -5  -9   0   20.52    7.54
  -6   9   0    3.52    7.27
   6   9   0    3.56    6.64
   6  -9   0    4.21    6.43
  -6  -9   0    7.04    4.44
   6  -9   0    1.34    8.94
  -6  -9   0   -3.51    7.19
  -7   9   0   34.37    6.03
   7   9   0   33.15    8.15
   7  -9   0   34.13    7.39
  -7  -9   0   30.59    5.06
   7  -9   0   37.31    9.10
  -7  -9   0   33.14    6.97
  -8   9   0   10.27    7.09
   8   9   0    8.98    5.77
   8   9   0    9.90    6.38
   8  -9   0   15.07    6.00
   8  -9   0   27.34   10.35
  -8  -9   0    9.35    7.11
  -9   9   0  132.61   10.42
   9   9   0  143.76   10.75
   9   9   0  111.31   10.23
   9  -9   0  145.16   11.94
  -9  -9   0  130.67    9.06
  -9   9   0  172.33   13.21
 -10   9   0  160.49   11.68
  10   9   0  167.99    9.84
  10   9   0  156.73   11.21
  10  -9   0  197.60   15.81
 -10  -9   0  160.63    8.76
 -10   9   0  203.99   16.19
 -11   9   0  157.17   11.75
  11   9   0  136.26   11.70
  11   9   0  165.25   12.31
  11  -9   0  221.02   14.07
 -11  -9   0  203.64   11.38
 -11   9   0  245.73   14.13
  12   9   0  273.93   15.43
  12  -9   0  353.07   16.28
 -12  -9   0  339.03   13.31
 -12   9   0  305.17   15.40
  13   9   0    2.61    6.68
  13   9   0   -2.71    9.63
  13  -9   0    6.90   10.63
 -13  -9   0    1.47    7.39
 -13   9   0   -7.66    8.87
  14   9   0   16.10   10.07
  14   9   0   -2.28    9.74
  14  -9   0  -18.69   11.44
 -14  -9   0    8.97    9.09
 -14   9   0   11.41    9.88
  15   9   0   25.52    9.39
  15  -9   0   39.59   11.99
 -15  -9   0   17.29    9.94
 -15   9   0   33.80   10.22
  16  -9   0   31.39   10.75
 -16  -9   0   20.09    7.72
 -16   9   0   25.04   12.57
  17  -9   0   50.95   12.54
 -17  -9   0   52.47   10.15
 -17   9   0   68.06    9.76
   0  10   0   69.17    8.64
   0 -10   0   69.77    6.98
   0 -10   0   65.12    8.55
  -1  10   0   92.17    8.11
   1  10   0   88.47    8.04
   1 -10   0   83.71    7.80
  -1 -10   0   77.48    6.61
   1 -10   0   86.54    8.11
  -1 -10   0   89.65    9.12
  -2  10   0   15.83    5.39
   2  10   0   14.86    6.79
   2 -10   0   24.80    6.68
  -2 -10   0   16.75    4.68
   2 -10   0   19.21    9.05
  -2 -10   0   26.59    8.23
  -3  10   0   34.74    7.18
   3  10   0   46.86    6.37
   3 -10   0   40.62    7.15
  -3 -10   0   30.73    5.27
   3 -10   0   31.70    8.98
  -3 -10   0   26.49    8.20
  -4  10   0   16.36    6.82
   4  10   0   30.47    7.22
   4 -10   0   23.57    6.37
  -4 -10   0   21.93    4.60
   4 -10   0   16.20    6.92
  -4 -10   0   24.86    6.54
  -5  10   0  110.89   10.61
   5  10   0  103.47    7.81
   5 -10   0  111.76    8.64
   5 -10   0  107.81   10.81
  -5 -10   0  104.64    8.63
  -6  10   0   37.79    6.51
   6  10   0   48.18    7.74
   6 -10   0   36.16    7.11
   6 -10   0   30.46   11.40
  -6 -10   0   31.03    8.74
  -7  10   0   -2.53    7.96
   7  10   0   -4.32    7.85
   7 -10   0    1.07    6.53
   7 -10   0   -4.95   10.05
  -7 -10   0    2.43    7.09
  -8  10   0    9.00    8.36
   8  10   0    3.21    5.32
   8 -10   0    4.60    7.37
   8 -10   0    5.12    8.21
  -8 -10   0    2.18   10.47
  -9  10   0  455.16   26.90
   9  10   0  494.03   28.24
   9  10   0  319.08   23.88
   9 -10   0  489.04   29.10
  -9 -10   0  444.12   25.61
  -9  10   0  299.33   35.02
 -10  10   0    5.82    8.76
  10  10   0    2.51    7.79
  10 -10   0    9.74   10.10
 -10 -10   0   10.48    7.05
 -10  10   0   -0.24    7.42
 -11  10   0   -0.27    7.28
  11  10   0   -0.55    8.45
  11 -10   0    9.42   12.16
 -11 -10   0   -0.96    9.04
 -11  10   0    2.39   10.71
  12  10   0   38.82    9.95
  12 -10   0   42.61   10.60
 -12 -10   0   38.36    7.06
 -12  10   0   37.58   10.15
  13  10   0   16.49   10.62
  13 -10   0   12.56   11.91
 -13 -10   0    6.15    9.14
 -13  10   0    5.19   11.02
  14  10   0   60.77    8.30
  14 -10   0   69.15   14.38
 -14 -10   0   59.83    8.99
 -14  10   0   47.16    7.98
  15 -10   0    3.40   14.08
 -15 -10   0   15.20    8.71
 -15  10   0   -4.01    8.83
  16 -10   0   -9.43   10.73
 -16 -10   0    1.87   12.02
 -16  10   0    2.89   12.51
  17 -10   0   34.47   14.19
 -17 -10   0   31.31    9.77
 -17  10   0   14.70   13.47
   0  11   0  120.30    8.05
   0 -11   0  123.52    8.62
   0 -11   0   95.52    8.54
  -1  11   0   73.70    8.98
   1  11   0   51.67    8.67
   1 -11   0   72.36    6.83
  -1 -11   0   60.84    6.81
   1 -11   0   69.21    9.53
  -1 -11   0   67.50    8.39
  -2  11   0    1.64    7.61
   2  11   0    9.54    7.67
   2 -11   0    9.62    5.54
   2 -11   0   13.90    9.69
  -2 -11   0    3.95    7.61
  -3  11   0   12.79    7.48
   3  11   0   27.41    8.24
   3 -11   0   10.02    6.04
   3 -11   0   29.52   10.05
  -3 -11   0   18.55    8.31
  -4  11   0   10.26    8.24
   4  11   0   19.11    6.82
   4 -11   0   27.70    7.21
   4 -11   0   22.56    8.52
  -4 -11   0   33.68    9.43
  -5  11   0    3.39    8.76
   5  11   0    3.76    7.52
   5 -11   0    5.24    8.05
   5 -11   0   16.08    8.70
  -5 -11   0   14.38    7.89
  -6  11   0   -6.14    8.33
   6  11   0   -1.15    8.83
   6 -11   0    5.49    6.97
   6 -11   0   -4.09   10.17
  -6 -11   0   -9.84    8.30
  -7  11   0   -3.42    8.87
   7  11   0   -2.08    8.19
   7 -11   0    8.90    7.57
   7 -11   0   -3.03    9.54
  -7 -11   0    5.18    8.09
  -8  11   0   50.64    8.71
   8  11   0   61.37    8.51
   8 -11   0   55.10    9.59
   8 -11   0   66.82   12.59
  -8 -11   0   44.51    9.32
  -9  11   0   89.44    9.53
   9  11   0   94.68    8.67
   9 -11   0   87.44    8.85
  -9 -11   0   87.83    9.18
  -9  11   0   93.57   11.23
 -10  11   0   34.44    9.78
  10  11   0   53.55   11.13
  10 -11   0   39.39    7.66
 -10 -11   0   52.12    9.07
 -10  11   0   41.51   12.58
 -11  11   0   21.69    9.15
  11  11   0   41.22   10.34
  11 -11   0   60.58   10.40
 -11 -11   0   52.87   10.42
 -11  11   0   53.04   11.23
  12  11   0   95.16    8.83
  12 -11   0   82.77   10.86
 -12 -11   0   70.55   11.27
 -12  11   0   45.98    9.77
  13  11   0    8.04    8.19
  13 -11   0   -4.02    7.92
 -13 -11   0   -3.81   11.00
 -13  11   0    9.45    8.63
  14  11   0    0.55    9.46
  14 -11   0    7.47   12.98
 -14 -11   0   -2.54    9.87
 -14  11   0   15.24   12.86
  15 -11   0   11.87   14.13
 -15 -11   0    6.24   13.34
 -15  11   0    3.44   12.42
  16 -11   0   32.81   14.45
 -16 -11   0   47.89   11.75
 -16  11   0   47.58   14.79
   0  12   0   56.76    9.49
   0 -12   0   32.96    5.79
   0 -12   0   37.60    8.43
  -1  12   0  169.09   10.52
   1  12   0  156.06   10.83
   1 -12   0  138.08    8.80
   1 -12   0  193.04   15.23
  -1 -12   0  164.45   13.16
  -2  12   0   13.12   10.30
   2  12   0    5.75    7.27
   2 -12   0    7.04    5.84
   2 -12   0   10.44   10.34
  -2 -12   0   -3.50    6.85
  -3  12   0   17.62    9.11
   3  12   0   12.69    9.20
   3 -12   0    2.86    6.09
   3 -12   0    9.37    9.18
  -3 -12   0    1.56    8.98
  -4  12   0  187.06   14.95
   4  12   0  191.27   13.69
   4 -12   0  167.86   10.49
   4 -12   0  153.48   11.94
  -4 -12   0  179.32   15.79
  -5  12   0    4.35    7.97
   5  12   0   12.46    9.69
   5 -12   0   18.67    8.47
   5 -12   0   12.32    9.63
  -5 -12   0   16.81    9.11
  -6  12   0   20.48    6.79
   6  12   0   27.28    9.53
   6 -12   0   17.63    7.35
   6 -12   0   14.79   10.81
  -6 -12   0   28.84    7.78
  -7  12   0    4.23    7.53
   7  12   0   -2.93    8.00
   7 -12   0    4.63    8.88
   7 -12   0  -11.18   12.05
  -7 -12   0   -0.88    6.00
  -8  12   0  202.66   13.53
   8  12   0  203.45   14.15
   8 -12   0  233.35   15.70
   8 -12   0  207.77   16.09
  -8 -12   0  197.05   13.07
  -9  12   0   83.26   10.69
   9  12   0   76.18    9.81
   9 -12   0  114.28   12.97
   9 -12   0   70.83   11.65
  -9 -12   0   81.75    9.30
 -10  12   0   92.42   11.65
  10  12   0  125.30   10.33
  10 -12   0  105.56   11.32
 -10 -12   0   97.77    9.03
 -10  12   0  118.24   14.94
  11  12   0    0.87    7.42
  11 -12   0    8.75   10.42
 -11 -12   0    6.38    8.93
 -11  12   0    2.27   10.34
  12  12   0   49.35   10.86
  12 -12   0   37.40   13.61
 -12 -12   0   47.34   12.04
 -12  12   0   45.44   12.09
  13  12   0    6.93   11.11
  13 -12   0    5.37   14.48
 -13 -12   0    4.68    9.64
 -13  12   0    0.62   10.99
  14  12   0   30.02   11.72
  14 -12   0   37.38   12.83
 -14 -12   0   24.91    9.68
 -14  12   0   35.82   10.58
  15 -12   0    1.31   10.69
 -15 -12   0   -5.45   11.80
 -15  12   0   -9.16   13.62
   0  13   0   36.00    9.53
   0 -13   0   29.50   11.07
  -1  13   0   19.71    9.75
   1  13   0   30.58    8.23
   1 -13   0   14.75   10.10
  -1 -13   0   30.44   12.50
  -2  13   0   11.64    7.24
   2  13   0   12.56    6.34
   2 -13   0    9.23   10.69
  -2 -13   0   23.47   12.48
  -3  13   0   38.11    7.17
   3  13   0   22.42    9.04
   3 -13   0   28.78    8.12
   3 -13   0   23.55   11.39
  -3 -13   0   32.02   13.29
  -4  13   0    1.41    6.30
   4  13   0    5.32    6.34
   4 -13   0    3.03    7.05
   4 -13   0    9.44   12.83
  -4 -13   0   12.26    8.49
  -5  13   0   -4.18    9.95
   5  13   0    7.09    8.65
   5 -13   0   -7.03    8.88
   5 -13   0   -7.63    9.74
  -5 -13   0  -13.68    9.75
  -6  13   0   82.29   12.62
   6  13   0   82.34    8.94
   6 -13   0   82.67   10.80
   6 -13   0   73.09   13.59
  -6 -13   0   75.44   10.84
  -7  13   0   32.03   10.30
   7  13   0   42.32    7.55
   7 -13   0   49.58   10.31
   7 -13   0   22.87   14.14
  -7 -13   0   34.41   11.22
  -8  13   0   10.80   11.13
   8  13   0    8.70    8.72
   8 -13   0   10.02    9.44
   8 -13   0    6.59   13.03
  -8 -13   0    2.61    8.26
  -9  13   0   32.99    8.64
   9  13   0   55.26   11.78
   9 -13   0   37.22   10.09
   9 -13   0   28.33   12.11
  -9 -13   0   59.86   11.01
 -10  13   0   59.45   13.15
  10  13   0   46.16    9.03
  10 -13   0   38.12   12.84
 -10 -13   0   49.60   10.87
 -10  13   0   20.07    9.03
  11  13   0   69.06   10.72
  11 -13   0   84.07   13.31
 -11 -13   0   85.17   12.80
 -11  13   0   85.87   13.85
  12  13   0   68.30   12.55
  12 -13   0   80.81   14.38
 -12 -13   0   71.48   10.07
 -12  13   0   59.72   11.59
  13  13   0   35.62   11.49
  13 -13   0   13.61   12.00
 -13 -13   0   23.17   11.12
 -13  13   0   34.53   13.05
  14  13   0    0.43   11.19
  14 -13   0    6.68   10.82
 -14 -13   0    4.10   13.10
 -14  13   0   -0.54   13.36
   0  14   0    1.38    7.52
   0 -14   0   -7.60   13.69
  -1  14   0  377.64   17.45
   1  14   0  364.31   17.07
   1 -14   0  404.11   21.99
  -1 -14   0  431.58   23.14
  -2  14   0   -6.17   11.37
   2  14   0   -3.48    8.10
   2 -14   0   -4.52    9.63
  -2 -14   0   12.56    9.05
  -3  14   0   -4.76    8.85
   3  14   0    5.65    8.40
   3 -14   0   -3.02   10.23
  -3 -14   0   -5.71    9.91
  -4  14   0  320.88   17.03
   4  14   0  388.40   20.11
   4 -14   0  358.52   21.54
  -4 -14   0  452.30   23.02
  -5  14   0  335.39   22.24
   5  14   0  385.67   20.52
   5 -14   0  296.92   20.26
  -5 -14   0  415.76   24.06
  -6  14   0   -8.51   10.20
   6  14   0    3.83    8.17
   6 -14   0    4.56   10.45
   6 -14   0   -6.52   11.74
  -6 -14   0   -8.83   12.06
  -7  14   0    7.74    9.66
   7  14   0    5.33    9.61
   7 -14   0   13.60   11.19
   7 -14   0    9.29   12.16
  -7 -14   0    7.78   10.84
  -8  14   0  158.84   14.11
   8  14   0  183.28   12.68
   8 -14   0  185.11   15.75
   8 -14   0  171.74   18.15
  -8 -14   0  162.27   13.83
  -9  14   0   84.68   10.96
   9  14   0  124.05   10.28
   9 -14   0  105.72   13.51
   9 -14   0   77.98   14.37
  -9 -14   0  119.30   10.94
  10  14   0  174.66   16.63
  10 -14   0  135.32   13.84
 -10 -14   0  207.18   15.59
 -10  14   0  228.84   17.13
  11  14   0   25.84    9.81
  11 -14   0   19.90   14.99
 -11 -14   0   19.78   10.66
 -11  14   0   26.91   11.76
  12  14   0   30.62    9.90
  12 -14   0   26.90   13.61
 -12 -14   0   18.31   12.68
 -12  14   0   25.99   14.01
   0  15   0   19.61   12.63
   0 -15   0   21.41   10.81
  -1  15   0   32.31   10.56
   1  15   0    9.32    9.25
   1 -15   0   10.99   11.15
  -1 -15   0   14.29   11.35
  -2  15   0   -2.83    8.66
   2  15   0   -6.76   10.18
   2 -15   0    1.45   10.48
  -2 -15   0   -8.24    9.03
  -3  15   0   45.81   10.47
   3  15   0   36.48    7.82
   3 -15   0   24.96   10.26
  -3 -15   0   37.89   11.32
  -4  15   0    2.48    9.92
   4  15   0    1.09    9.56
   4 -15   0   -0.55   10.20
  -4 -15   0    3.09   11.00
  -5  15   0    5.46   11.66
   5  15   0    3.93    7.46
   5 -15   0    6.64   10.47
  -5 -15   0    3.48   11.28
  -6  15   0   -3.50   13.61
   6  15   0    9.31    7.70
   6 -15   0   -3.29   11.07
  -6 -15   0  -12.33   14.14
  -7  15   0   -0.12   10.07
   7  15   0   12.26   11.61
   7 -15   0   14.85   15.05
  -7 -15   0   13.15   10.96
  -8  15   0   -0.60    9.22
   8  15   0    1.84    9.28
   8 -15   0   -9.98   13.08
  -8 -15   0    7.43   16.17
  -9  15   0   97.15   11.64
   9  15   0  116.42    9.98
   9 -15   0   66.28   14.68
  -9 -15   0   94.19   16.35
  10  15   0   29.00   12.80
 -10 -15   0   32.47   14.75
 -10  15   0   46.98   10.89
  11  15   0    8.54   11.11
 -11 -15   0    9.50   14.92
 -11  15   0   11.60   14.09
   0  16   0   29.33    9.24
   0 -16   0   50.82   14.66
  -1  16   0  338.27   17.19
   1  16   0  315.51   15.38
   1 -16   0  297.99   18.78
  -1 -16   0  353.45   19.47
  -2  16   0   34.36   12.50
   2  16   0   44.83   11.60
   2 -16   0   42.07   14.25
  -2 -16   0   39.40   15.26
  -3  16   0   13.01   10.02
   3  16   0   17.45    9.90
   3 -16   0   24.95   14.80
  -3 -16   0    0.42   13.48
  -4  16   0  189.74   15.37
   4  16   0  177.14   13.63
   4 -16   0  139.83   15.57
  -4 -16   0  164.13   16.71
  -5  16   0  193.26   14.57
   5  16   0  193.03   12.59
   5 -16   0  168.99   14.07
  -5 -16   0  177.86   17.49
  -6  16   0    5.15    9.10
   6  16   0    4.88   13.19
   6 -16   0    6.97   14.57
  -6 -16   0   13.60   14.78
  -7  16   0   -0.09   11.73
   7  16   0    7.35   11.94
   7 -16   0    0.97   13.30
  -7 -16   0    6.10   11.24
  -8  16   0  105.14   12.50
   8  16   0   81.72   12.22
   8 -16   0   92.23   16.14
  -8 -16   0  117.64   18.44
   0  17   0   53.78   10.88
   0 -17   0   44.80   15.12
  -1  17   0   -2.17   12.19
   1  17   0   13.25    8.19
   1 -17   0    4.45   11.07
  -1 -17   0   -1.95   13.16
  -2  17   0   -0.84    9.58
   2  17   0    0.86    9.00
   2 -17   0   -2.78   13.60
  -2 -17   0    0.96   11.11
  -3  17   0    8.78   12.06
   3  17   0   11.72    9.61
   3 -17   0    4.75    9.96
  -3 -17   0   25.15   14.92
  -4  17   0    0.94   12.20
   4  17   0    2.98    9.43
   4 -17   0    4.56   13.53
  -4 -17   0   -4.36   11.64
  -5  17   0   -1.16   12.96
   5  17   0   -3.61   11.19
   5 -17   0   17.92   10.52
  -5 -17   0   -2.12   13.49
  21   0  -1    1.20   12.97
 -21   0   1   -4.39   12.23
  20   0  -1    5.90   11.39
 -20   0   1    4.67    8.34
  19   0  -1   -3.60   13.35
 -19   0   1    2.54    7.47
  18   0  -1   -7.15   10.99
 -18   0   1    0.54    8.58
  17   0  -1    4.82    8.18
 -17   0   1    2.37    7.83
  16   0  -1   -4.31    8.09
 -16   0   1   12.32    8.12
  15   0  -1   -1.70    7.39
 -15   0   1    1.18    6.06
  14   0  -1   -1.71   10.04
 -14   0   1    3.88    7.14
  13   0  -1    7.70    8.92
 -13   0   1   -7.13    6.42
  12   0  -1    2.56    7.92
 -12   0   1   -0.77    6.31
 -11   0   1    1.81    7.73
  10   0  -1   -2.05    5.66
   9   0  -1   -9.24    6.98
  -9   0   1    0.01    5.70
   8   0  -1    0.94    6.18
  -8   0   1   -0.35    5.59
   7   0  -1    3.93    5.04
  -7   0   1   10.01    5.59
   6   0  -1    4.39    5.72
  -6   0   1    3.05    4.62
  -5   0   1   -0.18    2.71
   5   0  -1   -1.99    5.17
  -5   0   1    0.26    5.47
  -4   0   1    2.75    3.34
   4   0  -1    7.26    6.09
  -4   0   1   11.28    5.05
  -3   0   1    0.13    3.05
   3   0  -1    0.91    5.24
  -3   0   1    2.15    4.18
   2   0  -1    0.70    4.14
  -2   0   1   -0.24    4.13
   2   0  -1   -1.36    9.41
   2   0  -1    4.20    6.39
  -2   0   1   -6.53    6.56
  -1   0   1    4.14    5.12
   1   0  -1   -2.22    4.97
  -1   0   1    0.54    5.61
   1   0  -1    5.25    5.89
   1   0  -1   -2.58    4.57
  -1   0   1    1.08    4.58
   0   0   1    1.48    5.70
   0   0  -1    0.30    5.97
   0   0  -1   -1.06    3.41
   0   0   1    1.81    3.83
   0   0  -1    0.29    2.74
   0   0   1    0.18    2.50
   1   0   1    2.66    6.35
  -1   0  -1   -1.58    7.58
  -1   0  -1    3.91    5.46
   1   0   1    2.75    5.83
   1   0   1   -0.75    4.20
  -1   0  -1    2.82    5.52
  -2   0  -1    1.72    9.03
   2   0   1    6.22    4.81
  -2   0  -1    4.18    4.52
  -3   0  -1   -1.52    4.44
   3   0   1    1.62    4.57
  -3   0  -1    0.66    4.63
  -4   0  -1   -1.04    3.87
   4   0   1   -0.77    5.76
  -4   0  -1    3.68    5.56
  -5   0  -1    6.92    4.21
   5   0   1   10.01    5.01
  -5   0  -1    9.77    4.92
  -6   0  -1   -2.08    3.87
   6   0   1    1.98    4.69
  -6   0  -1   -0.16    4.71
  -7   0  -1    0.27    3.92
   7   0   1   -1.74    4.57
  -7   0  -1    1.72    5.37
   8   0   1    3.47    3.22
   8   0   1    8.87    6.66
  -8   0  -1    0.35    5.09
   9   0   1   -0.82    3.35
   9   0   1   -9.24    7.36
  -9   0  -1   -0.43    5.64
  10   0   1    4.09    3.42
  10   0   1    7.29    6.81
 -10   0  -1    1.97    6.58
  11   0   1   -1.40    3.28
  11   0   1   -5.10    7.23
 -11   0  -1    4.40    7.05
  12   0   1    6.54    8.76
 -12   0  -1   -1.42    8.07
  13   0   1   -0.76    8.11
 -13   0  -1   -1.90    8.81
  14   0   1    2.22    9.05
 -14   0  -1   -6.97    6.32
  15   0   1    3.67   10.28
 -15   0  -1   -2.83    6.84
  16   0   1    6.75   12.17
 -16   0  -1    9.55    7.96
  17   0   1   -3.80    9.90
 -17   0  -1   -5.05   11.81
  18   0   1    3.66   15.26
 -18   0  -1    7.45   12.45
  19   0   1    0.38   12.25
 -19   0  -1   -3.30   10.49
  20   0   1   14.27   11.45
 -20   0  -1   -5.62    9.68
  21   1  -1  246.47   18.45
  21  -1  -1  250.10   19.26
 -21  -1   1  243.71   14.87
 -21   1   1  257.04   14.78
  20   1  -1   12.89   10.46
  20  -1  -1   36.15   12.27
 -20  -1   1   26.02    9.22
 -20   1   1    2.69   10.53
  19   1  -1  222.09   15.90
  19  -1  -1  235.54   18.20
 -19  -1   1  213.59   12.26
 -19   1   1  214.22   14.92
  18   1  -1  599.55   25.75
  18  -1  -1  620.14   26.12
 -18  -1   1  551.62   20.79
 -18   1   1  558.23   20.76
  17   1  -1  434.21   23.42
  17  -1  -1  414.82   20.79
 -17  -1   1  417.57   18.55
 -17   1   1  411.04   20.65
  16   1  -1  202.21   16.33
  16  -1  -1  209.49   15.86
 -16  -1   1  168.72    9.89
 -16   1   1  190.10   13.04
  15   1  -1  -19.83   11.20
  15  -1  -1   -1.00    8.78
 -15  -1   1   -0.78    6.77
 -15   1   1   -4.63    6.90
  14   1  -1   29.84    9.65
  14  -1  -1   31.17    7.09
 -14  -1   1   13.70    8.87
 -14   1   1   26.08    7.06
  13   1  -1   24.16    7.42
  13  -1  -1   15.03    6.43
 -13  -1   1   16.98    7.07
 -13   1   1   14.92    7.19
  12   1  -1 1057.58   31.50
  12  -1  -1 1052.67   30.84
 -12  -1   1 1115.70   30.66
 -12   1   1 1070.48   30.53
  11   1  -1  873.95   29.07
  11  -1  -1  898.22   29.52
 -11  -1   1  870.58   26.86
 -11   1   1  870.56   26.50
  10   1  -1 1456.42   32.57
  10   1  -1 1600.52   32.37
  10  -1  -1 1633.03   32.62
 -10  -1   1 1642.36   32.52
 -10   1   1 1556.81   29.67
   9   1  -1 2565.74   59.82
   9   1  -1 2835.11   62.03
   9  -1  -1 2986.60   68.31
  -9  -1   1 2761.14   61.30
  -9   1   1 2881.68   58.36
   8   1  -1 2667.97   60.22
   8   1  -1 2434.78   63.82
   8  -1  -1 2533.69   55.04
  -8  -1   1 2547.83   54.02
  -8   1   1 2281.69   47.62
   7   1  -1  316.25   10.57
   7   1  -1  294.71   12.33
   7  -1  -1  314.01   11.62
  -7  -1   1  317.67   11.12
  -7   1   1  283.53   10.66
   6   1  -1  276.93    9.90
   6   1  -1  257.19   10.75
   6  -1  -1  260.93   10.79
  -6  -1   1  285.36   10.36
  -6   1   1  266.04   10.07
   5   1  -1   81.55    7.98
   5   1  -1   72.70    7.72
   5  -1  -1   63.90    7.23
  -5  -1   1   75.26    6.85
  -5   1   1   73.01    7.53
  -4   1   1  618.55   18.49
   4   1  -1  763.38   21.70
   4  -1  -1  757.12   21.30
  -3   1   1  868.24   25.30
   3   1  -1  924.89   24.53
  -3   1   1  872.77   22.38
   3   1  -1  983.07   25.91
   3  -1  -1  909.21   23.92
  -3  -1   1  980.57   23.65
  -3   1   1  910.24   22.49
   2   1  -1   56.83    8.11
  -2  -1   1   44.77    6.74
  -2   1   1   47.42    5.41
   2   1  -1   53.58    7.02
   2  -1  -1   53.44   10.16
   2  -1  -1   56.12    6.71
  -2  -1   1   58.21    7.78
  -1  -1   1 2798.63   64.96
  -1   1   1 2770.00   65.13
   0  -1   1 1325.70   33.19
   0   1  -1 1465.36   35.53
   0   1  -1 1267.20   31.16
   0   1   1 1248.14   34.38
   0  -1  -1 1398.17   31.78
  -1   1  -1  296.83   12.77
   1   1   1  318.51   11.51
  -1  -1  -1  290.56   10.32
  -1  -1  -1  318.44   12.72
  -1   1  -1  333.51   11.05
   1  -1   1  271.73    9.84
  -2   1  -1   87.75   10.93
   2   1   1   83.16    9.13
   2  -1   1   89.89    7.17
  -2  -1  -1   84.54    6.32
  -2   1  -1   96.79    6.83
  -3   1  -1  494.84   16.38
   3   1   1  487.56   14.74
   3   1   1  489.32   15.42
   3  -1   1  475.32   15.14
  -3  -1  -1  473.38   14.28
  -3   1  -1  508.26   15.28
  -4   1  -1  761.57   21.34
   4   1   1  720.32   18.96
   4   1   1  704.71   19.98
   4  -1   1  755.26   20.69
  -4  -1  -1  746.18   20.08
  -4   1  -1  739.59   19.61
  -5   1  -1  744.34   21.27
   5   1   1  671.58   18.33
   5   1   1  715.09   20.55
   5  -1   1  695.51   19.61
  -5  -1  -1  728.95   19.48
  -5   1  -1  732.73   19.45
  -6   1  -1    4.84    4.71
   6   1   1    4.22    3.04
   6   1   1    9.03    4.49
   6  -1   1    2.75    5.73
  -6  -1  -1    5.28    5.01
  -6   1  -1    2.53    4.58
  -7   1  -1   28.71    5.57
   7   1   1   23.56    3.89
   7   1   1   28.95    5.80
   7  -1   1   32.58    6.11
  -7  -1  -1   29.47    6.53
  -7   1  -1   31.13    5.67
  -8   1  -1  199.05    9.27
   8   1   1  183.30    7.83
   8   1   1  194.82    9.28
   8  -1   1  210.86   10.00
  -8  -1  -1  202.70    9.58
  -8   1  -1  181.04    8.24
  -9   1  -1  381.88   12.68
   9   1   1  375.91   11.59
   9   1   1  404.26   12.80
   9  -1   1  393.56   13.61
  -9  -1  -1  435.31   13.30
  -9   1  -1  402.52   13.08
  10   1   1   47.94    5.36
  10  -1   1   39.66    4.57
  10   1   1   53.26    7.86
  10  -1   1   55.77    8.05
 -10  -1  -1   54.29    6.40
 -10   1  -1   59.96    6.27
  11   1   1  792.09   24.07
  11   1   1  909.42   28.14
  11  -1   1  939.66   28.56
 -11  -1  -1  873.92   25.23
 -11   1  -1  928.69   27.45
  12   1   1  189.54    8.54
  12   1   1  222.75   12.06
  12  -1   1  233.97   14.09
 -12  -1  -1  213.37   10.95
 -12   1  -1  242.14   11.67
  13   1   1  115.38    9.88
  13  -1   1  130.79   12.58
 -13  -1  -1  102.15    7.79
 -13   1  -1  105.64    9.25
  14   1   1  504.14   28.51
  14  -1   1  476.60   28.86
 -14  -1  -1  377.53   21.24
 -14   1  -1  470.05   26.48
  15   1   1   -4.99    9.10
  15  -1   1    8.43   10.14
 -15  -1  -1   -6.83    8.53
 -15   1  -1    0.28    8.02
  16   1   1   67.82    9.75
  16  -1   1   78.12    9.28
 -16  -1  -1   74.90   10.18
 -16   1  -1   52.75    7.44
  17   1   1   -3.12   11.75
  17  -1   1   -7.02    9.05
 -17  -1  -1    0.03   10.45
 -17   1  -1   -0.08    9.33
  18   1   1  114.98   11.06
  18  -1   1   96.63   16.21
 -18  -1  -1  107.91    9.51
 -18   1  -1  122.31   12.61
  19   1   1    6.98   16.23
  19  -1   1   -0.04   13.42
 -19  -1  -1   -0.28    7.78
 -19   1  -1   -4.58   10.42
  20   1   1  139.36   16.12
  20  -1   1  167.00   15.32
 -20  -1  -1  157.99   11.34
 -20   1  -1  150.73   13.17
  21   2  -1   -4.03   16.62
  21  -2  -1  -10.85   14.07
 -21  -2   1   11.78   14.03
 -21   2   1    1.31   14.07
  20   2  -1    9.96   15.54
  20  -2  -1    4.52    9.46
 -20  -2   1    2.82   10.44
 -20   2   1   -7.10   11.76
  19   2  -1   -7.01   10.74
  19  -2  -1    6.83   11.16
 -19  -2   1    1.28    8.46
 -19   2   1   -9.63    7.16
  18   2  -1    7.79   11.53
  18  -2  -1   -2.40   10.85
 -18  -2   1    3.12    8.15
 -18   2   1   -0.65    7.67
  17   2  -1   11.37   10.96
  17  -2  -1   24.40   11.41
 -17  -2   1    5.19    8.71
 -17   2   1   25.71    7.39
  16   2  -1   21.81   11.08
  16  -2  -1   31.39   12.20
 -16  -2   1   11.51    6.94
 -16   2   1    8.09    7.02
  15   2  -1   -0.13    9.50
  15  -2  -1   -6.66    8.18
 -15  -2   1    0.08    6.42
 -15   2   1   -1.26    6.23
  14   2  -1   16.33    6.68
  14  -2  -1    9.46    9.39
 -14  -2   1   15.79    5.71
 -14   2   1   11.51    6.69
  13   2  -1   33.12    9.35
  13  -2  -1   40.20    8.33
 -13  -2   1   33.88    6.66
 -13   2   1   43.81    6.54
  12   2  -1   -0.41    7.27
  12  -2  -1    6.25    6.45
 -12  -2   1    3.55    6.53
 -12   2   1  -10.45    8.78
  11   2  -1    0.92    4.45
  11   2  -1    1.86    5.52
  11  -2  -1    2.10    6.11
 -11  -2   1    4.56    4.44
 -11   2   1    4.09    6.38
  10   2  -1   46.32    6.24
  10   2  -1   42.98    6.35
  10  -2  -1   34.44    8.70
 -10  -2   1   39.66    6.24
 -10   2   1   45.43    8.54
   9   2  -1    7.40    4.30
   9   2  -1    6.56    5.24
   9  -2  -1    7.33    6.36
  -9  -2   1    7.78    5.50
  -9   2   1    5.53    6.67
   8   2  -1   49.03    5.50
   8   2  -1   49.81    7.02
   8  -2  -1   51.44    6.46
  -8  -2   1   38.52    5.75
  -8   2   1   44.00    5.79
  -7   2   1   22.33    4.03
   7   2  -1   29.08    4.83
   7   2  -1   26.75    7.08
   7  -2  -1   31.73    6.89
  -7  -2   1   30.74    5.75
  -7   2   1   25.30    5.26
  -6   2   1    2.03    3.92
   6   2  -1    6.34    4.09
   6   2  -1   -3.51    6.16
   6  -2  -1    3.55    4.93
  -6  -2   1    4.95    4.04
  -6   2   1    2.61    4.68
  -5   2   1   86.70    7.72
   5   2  -1  120.92    7.30
   5   2  -1  117.87    8.64
   5  -2  -1  119.27    8.23
  -5  -2   1  120.21    8.10
  -5   2   1  110.25    7.39
   4   2  -1  150.98    8.04
  -4   2   1  115.07    8.10
   4   2  -1  146.67    9.64
   4  -2  -1  129.71    8.39
  -4  -2   1  144.98    8.10
   3   2  -1  101.51    7.71
  -3   2   1   84.59    8.25
   3   2  -1   88.40    8.75
   3  -2  -1   84.46    6.98
   3  -2  -1   89.97    7.84
  -3  -2   1   82.92    6.66
   2   2  -1   97.99    6.59
  -2   2   1   86.58    8.92
   2   2  -1  101.17    7.66
   2  -2  -1  100.80    7.08
   2  -2  -1  100.70    8.22
  -2  -2   1   99.90    6.97
   1   2  -1   94.86    7.18
  -1   2   1  102.11    6.14
   1  -2  -1  100.13    7.81
  -1   2   1   80.24    6.63
  -1  -2   1  105.18    6.45
   1  -2  -1  109.92    8.31
  -1  -2   1   99.47    8.67
   0   2  -1  272.99   10.01
   0   2   1  270.58    9.07
   0  -2   1  280.87    9.22
   0  -2   1  227.25   14.31
   0   2  -1  235.79   11.16
   0  -2  -1  275.24   10.42
  -1   2  -1   27.80    5.27
   1   2   1   32.10    4.78
   1   2   1   21.86    4.56
  -1  -2  -1   27.25    3.77
   1  -2   1   31.60    5.77
   1  -2   1   40.86    9.23
  -1  -2  -1   31.37    5.48
  -2   2  -1   11.37    5.75
   2   2   1    5.35    4.19
   2   2   1    8.66    6.58
   2  -2   1   16.49    5.04
  -2  -2  -1    8.97    5.02
  -2   2  -1    5.64    4.55
  -3   2  -1  314.77   11.51
   3   2   1  321.65   10.11
   3   2   1  313.19   10.81
   3  -2   1  337.35   10.99
  -3  -2  -1  326.57   10.89
  -3   2  -1  328.88   10.75
  -4   2  -1  114.10    7.63
   4   2   1  112.85    6.68
   4   2   1  119.60    7.80
   4  -2   1  131.09    8.76
  -4  -2  -1  119.17    7.89
  -4   2  -1  115.56    7.55
  -5   2  -1   45.42    6.40
   5   2   1   39.72    4.87
   5   2   1   38.88    5.71
   5  -2   1   59.22    7.21
  -5  -2  -1   39.19    5.38
  -5   2  -1   41.37    4.92
  -6   2  -1   -3.00    4.31
   6   2   1    1.15    3.30
   6   2   1    0.92    4.50
   6  -2   1    3.89    4.96
  -6  -2  -1    3.99    5.13
  -6   2  -1    3.94    5.74
  -7   2  -1   11.60    4.72
   7   2   1   14.46    3.91
   7   2   1   16.24    5.57
   7  -2   1   10.14    5.85
  -7  -2  -1   13.27    4.89
  -7   2  -1    8.61    5.87
  -8   2  -1  172.12    9.28
   8   2   1  159.97    7.74
   8   2   1  171.59    9.97
   8  -2   1  151.83    9.52
  -8  -2  -1  186.60    9.11
  -8   2  -1  176.36    8.57
  -9   2  -1  295.26   11.87
   9   2   1  275.17   10.30
   9   2   1  304.31   12.54
   9  -2   1  272.77   11.54
  -9  -2  -1  291.36   11.26
  -9   2  -1  287.09   11.33
 -10   2  -1   28.69    5.18
  10   2   1   34.64    5.48
  10   2   1   43.93    5.89
  10  -2   1   34.06    8.06
 -10  -2  -1   30.54    7.57
 -10   2  -1   34.99    6.90
  11   2   1  114.47    7.40
  11   2   1  106.94    9.29
  11  -2   1  124.37    9.31
 -11  -2  -1  107.74    9.41
 -11   2  -1  127.36    8.78
  12   2   1   -2.40    3.62
  12   2   1    0.14    8.50
  12  -2   1   -3.24    7.14
 -12  -2  -1   -0.02    5.43
 -12   2  -1    3.65    7.76
  13   2   1   22.20    7.34
  13  -2   1    9.20    8.26
 -13  -2  -1   11.61    8.79
 -13   2  -1   12.16    7.33
  14   2   1   41.13    9.63
  14  -2   1   52.82    9.19
 -14  -2  -1   42.92    7.34
 -14   2  -1   47.28    8.35
  15   2   1    4.48   12.40
  15  -2   1    1.49    9.57
 -15  -2  -1   10.11    8.63
 -15   2  -1    4.45    6.59
  16   2   1   16.14    8.26
  16  -2   1   17.17    9.27
 -16  -2  -1   22.05    8.99
 -16   2  -1   29.65    9.77
  17   2   1    3.04   10.72
  17  -2   1    8.45   11.35
 -17  -2  -1    6.66    8.10
 -17   2  -1   14.39    7.07
  18   2   1   -2.87   13.06
  18  -2   1    0.90   10.27
 -18  -2  -1    9.94    7.85
 -18   2  -1   14.38    8.05
  19   2   1    1.65   13.04
  19  -2   1    1.42   15.54
 -19  -2  -1   -0.56    8.62
 -19   2  -1   11.36   10.57
  20   2   1    0.66   16.94
  20  -2   1    9.19   15.56
 -20  -2  -1    6.70   10.80
 -20   2  -1   -1.56   10.45
  20   3  -1   -4.19   12.63
  20  -3  -1   -4.31   13.82
 -20  -3   1   -5.04   10.10
 -20   3   1   -2.01    9.00
  19   3  -1  125.70   14.57
  19  -3  -1   97.92   12.89
 -19  -3   1  124.21   12.83
 -19   3   1  132.66   11.99
  18   3  -1  353.13   21.45
  18  -3  -1  378.30   23.75
 -18  -3   1  380.18   20.72
 -18   3   1  352.04   19.14
  17   3  -1   90.09   13.08
  17  -3  -1   81.43   11.03
 -17  -3   1   80.90   10.55
 -17   3   1   79.02    9.39
  16   3  -1   24.70    8.25
  16  -3  -1   25.37   10.83
 -16  -3   1   32.92    6.91
 -16   3   1   25.72    7.21
  15   3  -1   16.19    9.84
  15  -3  -1   34.50   10.33
 -15  -3   1   21.56    7.05
 -15   3   1   26.04   10.01
  14   3  -1   19.90    8.68
  14  -3  -1   22.88   10.07
 -14  -3   1   12.55    7.67
 -14   3   1   14.71    8.00
  13   3  -1   14.79    8.04
  13  -3  -1   16.86    8.61
 -13  -3   1    7.40    6.23
 -13   3   1   15.26    6.05
  12   3  -1  174.00   10.15
  12   3  -1  211.95   11.79
  12  -3  -1  221.77   11.14
 -12  -3   1  210.99   11.13
 -12   3   1  210.60   10.40
  11   3  -1  176.61    9.04
  11   3  -1  246.02   11.78
  11  -3  -1  229.76   11.50
 -11  -3   1  227.66   10.62
 -11   3   1  229.87   10.22
  10   3  -1  326.52   12.23
  10   3  -1  347.71   13.06
  10  -3  -1  326.17   12.33
 -10  -3   1  353.44   12.95
 -10   3   1  307.43   11.12
   9   3  -1  557.04   16.14
   9   3  -1  644.34   18.55
   9  -3  -1  632.09   17.90
  -9  -3   1  659.04   16.32
  -9   3   1  645.97   16.09
   8   3  -1  408.22   14.60
   8   3  -1  368.25   14.28
   8  -3  -1  358.75   11.77
  -8  -3   1  409.74   14.29
  -8   3   1  365.19   10.84
  -7   3   1   51.77    5.50
   7   3  -1   63.16    6.43
   7   3  -1   70.63    7.46
   7  -3  -1   57.32    7.28
  -7  -3   1   70.06    6.87
  -7   3   1   61.66    6.68
   6   3  -1  896.74   23.99
   6   3  -1  925.75   27.00
   6  -3  -1  867.74   23.06
  -6  -3   1  899.30   22.33
  -6   3   1  901.06   22.78
  -5   3   1   48.79    5.44
   5   3  -1   49.48    6.03
   5   3  -1   46.54    7.83
   5  -3  -1   52.26    6.81
  -5  -3   1   51.94    6.48
   4   3  -1  108.65    7.60
  -4   3   1   94.41    6.58
   4   3  -1  101.44    8.73
   4  -3  -1   97.52    7.43
   4  -3  -1   92.34    8.98
  -4  -3   1   93.21    6.89
   3   3  -1  685.42   19.64
  -3   3   1  675.31   18.46
   3   3  -1  674.35   20.03
   3  -3  -1  640.58   18.46
   3  -3  -1  665.10   20.01
  -3  -3   1  641.95   18.44
   2   3  -1  207.68    9.32
  -2   3   1  210.62    9.48
   2   3  -1  183.27    9.95
   2  -3  -1  190.19    8.71
   2  -3  -1  184.55    9.84
  -2  -3   1  185.87    8.62
   1   3  -1  493.89   15.52
  -1   3   1  493.61   14.94
   1  -3  -1  478.15   15.73
  -1  -3   1  522.35   15.37
   1  -3  -1  491.85   16.22
  -1  -3   1  457.43   14.94
   0   3  -1  476.96   14.77
   0   3   1  488.02   14.84
   0  -3   1  502.64   14.76
   0  -3   1  511.61   16.27
   0  -3  -1  463.26   15.32
  -1   3  -1  267.18   10.58
   1   3   1  281.01    9.62
  -1  -3  -1  296.76   11.47
   1  -3   1  310.34   10.60
   1  -3   1  249.06   12.17
  -1  -3  -1  282.18   10.81
  -2   3  -1  217.59    9.63
   2   3   1  203.28    8.33
   2   3   1  175.42   11.21
   2  -3   1  213.37    9.05
   2  -3   1  199.02   10.45
  -2  -3  -1  214.76    9.63
  -3   3  -1  221.43    9.83
   3   3   1  213.84    8.64
   3   3   1  188.60    9.82
   3  -3   1  221.14    9.61
  -3  -3  -1  230.36    9.36
  -3   3  -1  226.82    9.26
  -4   3  -1  158.33    8.60
   4   3   1  158.95    7.55
   4   3   1  175.38    9.20
   4  -3   1  163.80    8.11
  -4  -3  -1  171.57    8.24
  -4   3  -1  167.69    8.40
  -5   3  -1  294.25   11.15
   5   3   1  309.90   10.27
   5   3   1  334.46   11.94
   5  -3   1  313.08   10.77
  -5  -3  -1  327.96   11.07
  -5   3  -1  311.82   10.33
  -6   3  -1  291.69   10.92
   6   3   1  288.61    9.89
   6   3   1  307.64   11.74
   6  -3   1  315.42   11.32
  -6  -3  -1  329.38   11.41
  -6   3  -1  303.43   10.88
  -7   3  -1   30.97    5.31
   7   3   1   25.88    5.60
   7   3   1   34.63    6.66
   7  -3   1   26.11    5.27
  -7  -3  -1   35.28    5.62
  -7   3  -1   30.23    6.03
  -8   3  -1  170.57    9.57
   8   3   1  178.13    8.23
   8   3   1  190.75    9.82
   8  -3   1  179.93    9.91
  -8  -3  -1  168.78    9.01
  -8   3  -1  167.28    8.58
  -9   3  -1  149.85    8.97
   9   3   1  131.23    7.04
   9   3   1  144.73    9.31
   9  -3   1  164.19    8.99
  -9  -3  -1  158.56    9.37
  -9   3  -1  149.34    8.51
 -10   3  -1   25.25    5.41
  10   3   1   32.43    5.05
  10   3   1   36.74    6.51
  10  -3   1   27.46    7.89
 -10  -3  -1   31.73    5.48
 -10   3  -1   30.70    7.31
  11   3   1  122.25    7.99
  11   3   1  148.59    9.56
  11  -3   1  135.55    8.80
 -11  -3  -1  132.32    9.37
 -11   3  -1  116.32    8.30
  12   3   1    3.56    4.71
  12   3   1   -0.30    8.73
  12  -3   1    0.38    7.15
 -12  -3  -1    0.67    6.81
 -12   3  -1   -1.31    7.59
  13   3   1  123.52    8.81
  13   3   1  143.06   10.85
  13  -3   1  137.35   11.80
 -13  -3  -1  154.78   11.02
 -13   3  -1  167.42   12.20
  14   3   1  336.45   20.49
  14  -3   1  355.32   23.39
 -14  -3  -1  326.45   19.67
 -14   3  -1  307.78   20.07
  15   3   1    1.41    8.62
  15  -3   1    2.44    9.90
 -15  -3  -1    4.22    8.62
 -15   3  -1    6.38    9.90
  16   3   1    5.90   11.57
  16  -3   1    6.23   12.94
 -16  -3  -1   19.30    8.83
 -16   3  -1   28.71   10.80
  17   3   1   37.36   11.84
  17  -3   1   28.62   11.36
 -17  -3  -1   56.02   11.15
 -17   3  -1   49.61    9.80
  18   3   1   29.52   12.25
  18  -3   1   25.94    9.46
 -18  -3  -1    9.63   10.55
 -18   3  -1   20.20    7.37
  19   3   1    8.17   10.77
  19  -3   1   -2.76    8.92
 -19  -3  -1    0.97    8.38
 -19   3  -1    4.79    7.74
  20   3   1   65.45   17.03
  20  -3   1   64.62   11.93
 -20  -3  -1   95.72   11.46
 -20   3  -1  107.36   15.56
  20   4  -1   14.77   14.13
  20  -4  -1    5.82   11.35
 -20  -4   1    7.28    9.61
 -20   4   1    8.22   12.06
  19   4  -1    2.72   12.46
  19  -4  -1   16.84   12.70
 -19  -4   1    0.39    7.07
 -19   4   1   -3.70   13.35
  18   4  -1   18.68   11.66
  18  -4  -1    5.93    9.38
 -18  -4   1   12.58    7.75
 -18   4   1    7.98   12.14
  17   4  -1    0.63    8.60
  17  -4  -1    1.62   12.85
 -17  -4   1   -4.99    9.92
 -17   4   1   -2.51    8.51
  16   4  -1   11.71   12.33
  16  -4  -1   -2.31    9.13
 -16  -4   1    1.93    6.88
 -16   4   1    1.60    8.00
  15   4  -1   -1.97    8.32
  15  -4  -1    7.49   10.07
 -15  -4   1   -1.47    9.25
 -15   4   1   -1.23    9.48
  14   4  -1   30.70    7.65
  14  -4  -1   38.83    8.08
 -14  -4   1   38.02    6.85
 -14   4   1   25.61    6.63
  13   4  -1   -1.30    5.92
  13   4  -1   -1.46    9.13
  13  -4  -1   -6.91   10.36
 -13  -4   1    0.08    6.29
 -13   4   1   -3.24    7.65
  12   4  -1   18.76    5.86
  12   4  -1   24.89    7.50
  12  -4  -1   20.88    7.20
 -12  -4   1   24.18    5.78
 -12   4   1   18.36    7.40
  11   4  -1   12.50    6.08
  11   4  -1   10.19    7.62
  11  -4  -1    0.58    7.54
 -11  -4   1    7.50    4.91
 -11   4   1    7.18    6.22
  10   4  -1    8.25    4.63
  10   4  -1    7.96    7.08
  10  -4  -1    1.46    7.06
 -10  -4   1    9.90    6.83
 -10   4   1   -3.27    6.94
  -9   4   1   39.03    5.40
   9   4  -1   54.43    5.99
   9   4  -1   66.14    7.59
   9  -4  -1   46.55    7.01
  -9  -4   1   61.22    6.59
  -9   4   1   43.01    5.44
  -8   4   1   68.26    6.02
   8   4  -1   98.49    7.31
   8   4  -1   92.19    8.46
   8  -4  -1   97.95    8.38
  -8  -4   1   94.22    7.66
  -8   4   1   98.45    7.87
  -7   4   1  214.73    9.68
   7   4  -1  233.44   10.04
   7   4  -1  225.49   11.29
   7  -4  -1  216.47   10.55
  -7  -4   1  219.21    9.38
  -7   4   1  216.00    9.46
  -6   4   1   74.06    6.58
   6   4  -1  102.18    7.21
   6   4  -1   97.61    8.10
   6  -4  -1  107.54    8.50
  -6  -4   1  104.72    7.37
  -5   4   1    3.79    4.01
   5   4  -1    4.06    3.92
   5   4  -1    1.84    5.45
   5  -4  -1    3.67    5.23
   5  -4  -1    1.99    6.19
  -5  -4   1   11.44    4.76
   4   4  -1   16.06    5.22
  -4   4   1   13.18    4.96
   4   4  -1   11.98    5.62
   4  -4  -1   11.73    5.50
   4  -4  -1   12.32    6.58
  -4  -4   1    9.63    5.37
   3   4  -1  196.05    9.04
  -3   4   1  186.86    9.11
   3   4  -1  184.86    9.84
   3  -4  -1  181.60    8.94
   3  -4  -1  186.12   10.11
  -3  -4   1  177.78    8.93
   2   4  -1  119.72    7.95
  -2   4   1  103.11    6.68
   2  -4  -1  108.36    6.93
  -2  -4   1  111.73    6.68
   2  -4  -1  121.39    9.10
  -2  -4   1  107.75    7.14
   1   4  -1  705.80   19.24
  -1   4   1  687.44   18.24
   1  -4  -1  677.58   18.50
  -1  -4   1  626.34   17.25
   1  -4  -1  675.15   19.39
  -1  -4   1  631.63   19.91
   0   4  -1  982.33   25.33
   0   4   1  980.26   23.33
   0  -4  -1 1015.96   25.02
   0  -4   1  985.30   24.97
   0  -4   1  898.55   25.68
   0  -4  -1  951.20   23.77
  -1   4  -1  396.13   13.68
   1   4   1  390.76   13.09
   1  -4   1  413.75   13.71
   1  -4   1  373.04   16.33
  -1  -4  -1  358.70   11.46
  -2   4  -1  436.25   14.25
   2   4   1  437.78   14.64
   2   4   1  353.31   15.62
   2  -4   1  455.27   14.70
   2  -4   1  372.60   15.78
  -2  -4  -1  455.29   14.66
  -3   4  -1   -4.72    5.49
   3   4   1   -2.10    4.83
   3   4   1   -0.63    5.45
   3  -4   1    2.08    4.13
   3  -4   1   -2.04    6.41
  -3  -4  -1   -0.24    4.56
  -4   4  -1  102.15    6.71
   4   4   1  103.87    6.72
   4   4   1  112.74    8.40
   4  -4   1  102.87    6.63
  -4  -4  -1  100.53    6.81
  -4   4  -1  112.46    7.09
  -5   4  -1  116.53    7.16
   5   4   1  130.52    7.23
   5   4   1  141.82    8.68
   5  -4   1  123.03    7.78
  -5  -4  -1  128.15    7.95
  -5   4  -1  132.09    7.35
  -6   4  -1   84.62    7.21
   6   4   1   81.93    6.34
   6   4   1   91.69    7.62
   6  -4   1   83.86    7.67
  -6  -4  -1   75.22    6.04
  -6   4  -1   75.55    6.49
  -7   4  -1   26.15    4.56
   7   4   1   24.91    5.33
   7   4   1   27.04    7.00
   7  -4   1   29.74    6.28
  -7  -4  -1   27.31    6.50
  -7   4  -1   16.56    5.33
  -8   4  -1   70.52    6.96
   8   4   1   84.64    6.18
   8   4   1   83.12    7.96
   8  -4   1   75.13    7.35
  -8  -4  -1   91.95    7.82
  -8   4  -1   89.75    8.19
  -9   4  -1  172.94    9.19
   9   4   1  173.08    8.80
   9   4   1  170.97   10.18
   9  -4   1  169.83    9.51
  -9  -4  -1  194.05    9.80
  -9   4  -1  181.67    8.49
 -10   4  -1    4.30    5.20
  10   4   1    7.50    5.41
  10   4   1   12.09    7.31
  10  -4   1    5.23    5.89
 -10  -4  -1   13.33    6.31
 -10   4  -1    9.92    6.41
  11   4   1   88.93    6.85
  11   4   1   70.49    7.69
  11  -4   1   85.61    8.99
 -11  -4  -1   95.25    8.99
 -11   4  -1   68.73    6.93
  12   4   1    3.23    5.23
  12   4   1   -0.80    7.43
  12  -4   1    0.03   10.48
 -12  -4  -1   -2.32    5.87
 -12   4  -1    4.82    7.02
  13   4   1  103.02    8.88
  13   4   1  127.55   10.94
  13  -4   1  140.76    9.83
 -13  -4  -1  141.16    9.39
 -13   4  -1  112.23    8.79
  14   4   1   -0.96    6.77
  14  -4   1    2.64    8.28
 -14  -4  -1    4.39    6.58
 -14   4  -1    1.02    6.67
  15   4   1   10.75    7.72
  15  -4   1   -3.13    7.05
 -15  -4  -1    0.78    6.90
 -15   4  -1   10.16    9.04
  16   4   1   -1.52    9.22
  16  -4   1   -2.48    8.48
 -16  -4  -1    4.67   10.26
 -16   4  -1    4.57   10.05
  17   4   1   40.08    9.95
  17  -4   1   61.07   10.08
 -17  -4  -1   56.71    7.68
 -17   4  -1   46.29   11.63
  18   4   1   -2.14    9.76
  18  -4   1   -9.25    9.88
 -18  -4  -1   11.49    9.69
 -18   4  -1    5.22   11.16
  19   4   1   23.67   12.90
  19  -4   1   26.39   13.70
 -19  -4  -1   20.81    9.46
 -19   4  -1   34.31   11.11
  20   5  -1   11.46   14.73
  20  -5  -1    0.18   12.91
 -20  -5   1    9.32    9.17
 -20   5   1   -4.45   10.56
  19   5  -1   73.78   13.71
  19  -5  -1   75.58   16.11
 -19  -5   1   83.05   10.55
 -19   5   1  100.31   12.66
  18   5  -1  256.47   17.92
  18  -5  -1  296.67   16.09
 -18  -5   1  305.22   16.43
 -18   5   1  333.17   17.93
  17   5  -1   88.94   12.79
  17  -5  -1   82.54   12.81
 -17  -5   1   81.35   10.48
 -17   5   1   91.40   11.68
  16   5  -1   26.93   12.55
  16  -5  -1   26.47   10.18
 -16  -5   1   25.55    8.43
 -16   5   1   36.19    7.18
  15   5  -1   12.72    8.78
  15  -5  -1   22.71   11.02
 -15  -5   1   20.62    8.60
 -15   5   1   18.70    9.23
  14   5  -1   11.47    6.29
  14   5  -1    7.30    9.36
  14  -5  -1    7.08    9.66
 -14  -5   1    8.75    8.73
 -14   5   1   18.44    7.95
  13   5  -1   21.50    6.28
  13   5  -1   33.92    9.62
  13  -5  -1   35.01    7.57
 -13  -5   1   27.78    8.74
 -13   5   1   29.30    8.80
  12   5  -1  532.49   20.10
  12   5  -1  502.62   20.79
  12  -5  -1  501.87   20.00
 -12  -5   1  514.74   18.97
 -12   5   1  481.21   18.08
  11   5  -1  184.44   11.50
  11  -5  -1  226.47   13.25
 -11  -5   1  204.06   10.98
 -11   5   1  197.00   10.33
  10   5  -1  364.32   13.30
  10   5  -1  355.62   14.60
  10  -5  -1  326.16   12.75
 -10  -5   1  331.05   11.68
 -10   5   1  340.01   12.48
   9   5  -1  585.64   21.29
   9   5  -1  620.12   22.69
   9  -5  -1  593.55   21.24
  -9  -5   1  613.94   20.19
  -9   5   1  587.05   20.13
  -8   5   1  283.98   14.06
   8   5  -1  366.36   13.02
   8   5  -1  304.55   13.98
   8  -5  -1  338.85   13.93
  -8  -5   1  369.40   12.51
  -8   5   1  341.63   12.00
  -7   5   1    5.50    4.06
   7   5  -1    9.68    4.96
   7   5  -1    3.94    5.78
   7  -5  -1    3.44    5.87
  -7  -5   1    4.29    4.91
  -7   5   1    0.25    4.20
  -6   5   1   50.25    5.75
   6   5  -1   51.81    6.56
   6   5  -1   57.02    7.49
   6  -5  -1   51.21    6.44
   6  -5  -1   54.51    7.86
  -6  -5   1   44.44    6.06
  -5   5   1    0.83    4.76
   5   5  -1    2.26    5.62
   5   5  -1    2.84    5.26
   5  -5  -1   -3.22    5.61
   5  -5  -1    1.55    5.79
  -5  -5   1    3.51    5.58
   4   5  -1   81.23    7.35
  -4   5   1   79.79    6.62
   4   5  -1   77.19    7.26
   4  -5  -1   69.43    5.96
   4  -5  -1   80.70    8.34
  -4  -5   1   82.01    6.87
   3   5  -1  180.34    8.65
  -3   5   1  202.31    9.31
   3  -5  -1  171.11    8.78
  -3  -5   1  175.30    8.31
   3  -5  -1  195.77   10.77
  -3  -5   1  177.35    9.13
   2   5  -1    8.47    4.32
  -2   5   1   11.48    5.34
   2  -5  -1   11.33    4.29
  -2  -5   1   14.85    3.99
   2  -5  -1   12.23    6.29
  -2  -5   1   10.21    4.27
   1   5  -1  801.34   21.64
  -1   5   1  776.76   20.55
   1  -5  -1  766.23   20.80
  -1  -5   1  743.16   19.70
   1  -5  -1  771.00   21.55
  -1  -5   1  786.56   21.03
   0   5  -1  373.90   13.08
   0   5   1  362.08   10.97
   0  -5  -1  371.74   13.49
   0  -5   1  367.85   12.57
   0  -5   1  374.26   14.18
   0  -5  -1  376.57   13.88
  -1   5  -1    2.71    5.35
   1   5   1    2.46    4.23
   1  -5   1    4.43    4.20
  -1  -5  -1    6.03    4.91
   1  -5   1   -0.86    5.24
  -1  -5  -1    4.00    4.67
  -2   5  -1   67.67    6.90
   2   5   1   77.88    6.42
   2  -5   1   66.91    6.44
  -2  -5  -1   77.58    6.58
   2  -5   1   72.08    7.31
  -2  -5  -1   76.02    7.18
  -3   5  -1  284.32   10.54
   3   5   1  276.35   10.19
   3   5   1  251.68   10.95
   3  -5   1  288.08   10.57
   3  -5   1  269.92   11.42
  -3  -5  -1  295.84   11.32
  -4   5  -1  268.96   10.63
   4   5   1  265.58    9.97
   4  -5   1  267.28   10.16
   4  -5   1  242.65   12.76
  -4  -5  -1  257.16    9.97
  -5   5  -1   64.77    6.79
   5   5   1   65.12    5.96
   5   5   1   61.90    6.80
   5  -5   1   56.91    6.26
  -5  -5  -1   65.28    6.13
  -5   5  -1   62.82    6.22
  -6   5  -1   20.69    6.37
   6   5   1   24.29    5.74
   6   5   1   24.93    6.02
   6  -5   1   25.76    5.78
  -6  -5  -1   23.13    6.49
  -6   5  -1   22.70    5.46
  -7   5  -1    5.14    4.87
   7   5   1    1.82    4.26
   7   5   1    0.38    4.78
   7  -5   1    4.04    6.05
  -7  -5  -1    9.92    5.73
  -7   5  -1    6.30    4.93
  -8   5  -1  105.27    7.68
   8   5   1  118.24    6.89
   8   5   1  124.98    9.09
   8  -5   1  110.71    7.19
  -8  -5  -1  119.48    7.97
  -8   5  -1  129.27    8.75
  -9   5  -1  126.86    8.25
   9   5   1  151.03    8.63
   9   5   1  149.21    9.96
   9  -5   1  157.09    9.66
  -9  -5  -1  138.16    8.74
  -9   5  -1  146.92    8.64
 -10   5  -1   11.31    6.14
  10   5   1   15.38    5.82
  10   5   1   15.45    6.96
  10  -5   1   15.04    7.75
 -10  -5  -1   13.22    6.91
 -10   5  -1    5.09    4.85
 -11   5  -1  136.74    9.42
  11   5   1  174.97    9.36
  11   5   1  171.67   11.71
  11  -5   1  186.15    9.82
 -11  -5  -1  149.53    9.29
 -11   5  -1  175.90    9.05
  12   5   1   54.37    6.12
  12   5   1   60.44    9.62
  12  -5   1   56.37    9.51
 -12  -5  -1   64.79    9.77
 -12   5  -1   48.57    6.84
  13   5   1   34.39    6.59
  13   5   1   48.71    8.74
  13  -5   1   50.30    9.85
 -13  -5  -1   40.08    9.32
 -13   5  -1   45.74    9.61
  14   5   1   39.31    6.92
  14   5   1   57.00   11.85
  14  -5   1   54.20    8.40
 -14  -5  -1   64.30    8.08
 -14   5  -1   61.55    7.43
  15   5   1    6.63    8.09
  15  -5   1    6.12    8.86
 -15  -5  -1    7.75    8.22
 -15   5  -1   -2.98    8.07
  16   5   1    9.67    7.89
  16  -5   1   16.35    8.97
 -16  -5  -1   28.73    8.48
 -16   5  -1   24.07   10.64
  17   5   1   45.94   11.84
  17  -5   1   41.24    9.48
 -17  -5  -1   43.76   10.87
 -17   5  -1   31.78    9.59
  18   5   1   42.23   14.73
  18  -5   1   30.90   12.31
 -18  -5  -1   45.98    9.66
 -18   5  -1   56.45   10.52
  19   5   1    5.70   13.95
  19  -5   1    9.38   12.00
 -19  -5  -1   -6.37   10.22
 -19   5  -1    1.65    8.23
  19   6  -1   -2.14   13.93
  19  -6  -1  -12.95   11.66
 -19  -6   1    5.35   10.47
 -19   6   1    2.91    9.50
  18   6  -1   42.72   10.21
  18  -6  -1   46.08   11.34
 -18  -6   1   47.20    9.02
 -18   6   1   58.31   11.24
  17   6  -1   16.32   11.64
  17  -6  -1   16.46   12.03
 -17  -6   1    9.57    6.56
 -17   6   1   13.63    7.36
  16   6  -1   -5.62   10.72
  16  -6  -1   11.11    9.35
 -16  -6   1   -4.20    7.47
 -16   6   1    4.16    9.33
  15   6  -1   75.25   12.61
  15  -6  -1   68.72   10.36
 -15  -6   1   74.28    8.18
 -15   6   1   83.63   10.61
  14   6  -1   61.68    9.37
  14  -6  -1   65.56   12.99
 -14  -6   1   74.48    8.55
 -14   6   1   56.92    7.48
  13   6  -1   13.50    7.14
  13   6  -1   19.48    9.32
  13  -6  -1   23.72    7.68
 -13  -6   1   25.60    8.19
 -13   6   1   18.75    8.65
  12   6  -1   18.33    6.53
  12   6  -1   11.53    9.83
  12  -6  -1    6.48    8.33
 -12  -6   1   12.58    6.43
 -12   6   1    7.56    7.86
  11   6  -1  209.92   11.77
  11   6  -1  188.70   11.23
  11  -6  -1  212.58   13.55
 -11  -6   1  193.68   10.43
 -11   6   1  178.32    9.31
 -10   6   1   49.16    6.39
  10   6  -1   60.13    7.59
  10   6  -1   64.03    9.28
  10  -6  -1   60.64    8.54
 -10  -6   1   57.19    6.45
 -10   6   1   62.82    7.00
  -9   6   1  726.24   27.18
   9   6  -1  828.74   28.36
   9   6  -1  834.64   29.53
   9  -6  -1  791.54   26.18
  -9  -6   1  830.84   25.29
  -9   6   1  770.81   24.69
  -8   6   1  150.17    9.07
   8   6  -1  169.89    9.27
   8   6  -1  149.65    9.52
   8  -6  -1  149.38    9.16
  -8  -6   1  169.15    9.32
  -8   6   1  172.92    8.88
  -7   6   1   22.73    5.38
   7   6  -1   21.68    5.46
   7   6  -1   21.06    6.16
   7  -6  -1   24.39    5.56
   7  -6  -1   34.67    8.58
  -7  -6   1   23.69    6.26
  -6   6   1  436.56   16.74
   6   6  -1  481.98   14.47
   6   6  -1  445.83   16.48
   6  -6  -1  464.34   15.20
   6  -6  -1  444.50   14.92
  -6  -6   1  430.71   12.97
  -5   6   1  562.11   20.91
   5   6  -1  604.80   18.38
   5   6  -1  656.17   20.93
   5  -6  -1  573.97   18.99
   5  -6  -1  605.42   20.11
  -5  -6   1  577.66   17.49
   4   6  -1  574.00   18.00
  -4   6   1  592.17   18.78
   4  -6  -1  545.05   17.69
  -4  -6   1  554.96   18.78
   4  -6  -1  609.11   20.22
  -4  -6   1  518.25   17.68
   3   6  -1  444.27   15.19
  -3   6   1  464.61   15.84
   3  -6  -1  441.96   15.75
  -3  -6   1  433.75   14.83
   3  -6  -1  462.32   17.09
  -3  -6   1  391.63   14.22
   2   6  -1  160.75    8.86
  -2   6   1  171.24    8.86
   2  -6  -1  154.35    8.11
  -2  -6   1  143.51    7.35
   2  -6  -1  164.66    9.97
  -2  -6   1  153.18    8.71
   1   6  -1 2181.09   47.39
  -1   6   1 2228.92   49.62
   1  -6  -1 2099.39   50.18
  -1  -6   1 2088.31   46.05
   1  -6  -1 2102.66   48.11
  -1  -6   1 2115.56   46.94
   0   6  -1 2855.17   61.33
   0   6   1 2888.00   59.82
   0  -6  -1 2881.71   65.48
   0  -6   1 2735.85   62.43
   0  -6   1 2601.20   60.12
   0  -6  -1 2934.58   61.33
  -1   6  -1  773.38   21.73
   1   6   1  762.69   20.14
   1  -6   1  739.52   20.40
  -1  -6  -1  793.97   20.59
   1  -6   1  849.75   24.68
  -1  -6  -1  803.66   22.11
  -2   6  -1  469.28   17.62
   2   6   1  519.17   15.68
   2  -6   1  498.59   16.36
  -2  -6  -1  517.53   15.03
   2  -6   1  585.01   18.95
  -2  -6  -1  482.69   18.31
  -3   6  -1  323.39   11.80
   3   6   1  332.37   10.95
   3  -6   1  339.12   11.57
  -3  -6  -1  342.45   10.87
   3  -6   1  342.11   13.76
  -3  -6  -1  353.30   12.27
  -4   6  -1  994.48   25.81
   4   6   1  976.21   24.99
   4   6   1  812.81   33.00
   4  -6   1  957.14   25.44
   4  -6   1  901.47   30.33
  -4  -6  -1  972.31   25.71
  -5   6  -1   97.16    7.61
   5   6   1  107.03    7.03
   5   6   1   81.98    8.06
   5  -6   1  101.11    7.16
   5  -6   1   98.59    9.10
  -5  -6  -1  105.56    8.20
  -6   6  -1  156.45    8.83
   6   6   1  153.59    8.34
   6   6   1  112.57    9.50
   6  -6   1  147.52    8.57
  -6  -6  -1  141.40    8.28
  -6   6  -1  150.89    8.57
  -7   6  -1    7.97    4.86
   7   6   1    7.11    5.53
   7   6   1    9.45    5.45
   7  -6   1    5.43    5.99
  -7  -6  -1   10.22    5.21
  -7   6  -1    2.08    5.69
  -8   6  -1  147.84    9.81
   8   6   1  183.74    9.06
   8   6   1  143.04   10.04
   8  -6   1  161.83    8.59
  -8  -6  -1  189.17   10.30
  -8   6  -1  166.67    8.84
  -9   6  -1  459.26   18.12
   9   6   1  533.07   18.27
   9   6   1  559.39   21.81
   9  -6   1  504.74   17.71
  -9  -6  -1  576.04   19.31
  -9   6  -1  566.35   19.24
 -10   6  -1  302.34   14.55
  10   6   1  330.43   14.38
  10   6   1  329.46   15.15
  10  -6   1  362.97   16.03
 -10  -6  -1  316.63   13.57
 -10   6  -1  345.06   14.88
 -11   6  -1    5.25    5.69
  11   6   1    9.04    4.57
  11   6   1    7.14    6.87
  11  -6   1   12.24    6.68
 -11  -6  -1   20.16    7.53
 -11   6  -1   13.55    8.55
  12   6   1    6.67    7.60
  12   6   1  -11.92    8.61
  12  -6   1    0.15    7.84
 -12  -6  -1    1.85    5.60
 -12   6  -1    6.67    8.49
  13   6   1  108.84    9.14
  13   6   1  106.64   10.19
  13  -6   1   97.35   11.50
 -13  -6  -1  133.62   10.67
 -13   6  -1  117.26   11.79
  14   6   1   72.75    9.25
  14   6   1   79.95   10.09
  14  -6   1   86.76   10.28
 -14  -6  -1   88.53    8.00
 -14   6  -1  103.46    8.60
  15   6   1   65.74   11.68
  15  -6   1   80.41   10.27
 -15  -6  -1   76.79    8.70
 -15   6  -1   99.43   10.49
  16   6   1   14.68   10.55
  16  -6   1   -0.70    7.96
 -16  -6  -1   -1.21    7.29
 -16   6  -1   14.36    7.65
  17   6   1   57.94    9.41
  17  -6   1   55.99    9.97
 -17  -6  -1   60.42    9.26
 -17   6  -1   76.84   14.02
  18   6   1   20.19   12.54
  18  -6   1   19.61   11.81
 -18  -6  -1   19.21    9.82
 -18   6  -1    3.55   11.53
  19  -6   1    3.19   11.42
 -19  -6  -1   -4.43   13.62
 -19   6  -1    7.98   10.88
  19   7  -1   94.94   16.31
  19  -7  -1  103.54   15.72
 -19  -7   1  122.98   11.41
 -19   7   1  103.31   12.32
  18   7  -1  163.87   14.03
  18  -7  -1  192.04   16.20
 -18  -7   1  199.11   13.17
 -18   7   1  186.93   13.33
  17   7  -1   93.68   11.71
  17  -7  -1   98.87   14.28
 -17  -7   1  129.70    9.92
 -17   7   1  100.01   12.02
  16   7  -1    6.57    9.92
  16  -7  -1    6.65   10.89
 -16  -7   1    4.74    8.62
 -16   7   1   -1.64    7.29
  15   7  -1   37.23   11.31
  15  -7  -1   55.66   11.09
 -15  -7   1   37.88    8.81
 -15   7   1   54.31   10.69
  14   7  -1   50.11    8.96
  14   7  -1   41.82    8.61
  14  -7  -1   38.81    9.35
 -14  -7   1   43.83    8.85
 -14   7   1   46.11   10.16
  13   7  -1   62.75    9.67
  13   7  -1   64.62    8.85
  13  -7  -1   88.35    9.40
 -13  -7   1   63.68    8.12
 -13   7   1   59.67    7.63
  12   7  -1  104.53   10.62
  12   7  -1   89.06   11.70
  12  -7  -1  102.54   12.03
 -12  -7   1   90.01    9.88
 -12   7   1   94.02   10.56
 -11   7   1   -2.84    5.32
  11   7  -1   -1.87    6.80
  11   7  -1   -0.16    8.14
  11  -7  -1   -3.34    8.12
 -11  -7   1    0.36    6.77
 -11   7   1    3.58    6.79
 -10   7   1  398.43   20.86
  10   7  -1  566.06   21.33
  10   7  -1  457.27   19.98
  10  -7  -1  466.37   21.01
 -10  -7   1  490.01   18.53
 -10   7   1  532.78   20.29
  -9   7   1 1184.45   49.25
   9   7  -1 1417.41   42.00
   9   7  -1 1366.33   45.18
   9  -7  -1 1348.04   41.31
  -9  -7   1 1287.88   36.88
  -9   7   1 1274.94   38.49
  -8   7   1  608.66   23.02
   8   7  -1  636.61   22.06
   8   7  -1  598.42   24.09
   8  -7  -1  584.90   22.16
   8  -7  -1  611.88   23.81
  -8  -7   1  652.21   21.18
  -7   7   1    2.67    4.97
   7   7  -1   -2.56    5.34
   7   7  -1    6.03    5.62
   7  -7  -1   -1.65    6.19
   7  -7  -1    1.08    7.59
  -7  -7   1   -1.73    5.86
  -6   7   1   34.64    5.82
   6   7  -1   29.59    6.79
   6   7  -1   31.19    6.94
   6  -7  -1   22.74    6.19
   6  -7  -1   22.75    7.11
  -6  -7   1   29.53    6.26
  -5   7   1  151.44    8.68
   5   7  -1  157.23    8.67
   5  -7  -1  132.08    8.05
  -5  -7   1  133.00    8.06
   5  -7  -1  146.43   10.14
  -5  -7   1  147.88    9.11
  -4   7   1  741.19   20.97
   4   7  -1  812.11   19.80
   4  -7  -1  745.71   20.14
  -4  -7   1  787.69   20.11
   4  -7  -1  840.07   22.42
  -4  -7   1  766.30   18.73
   3   7  -1  343.75   12.39
  -3   7   1  337.94   11.32
   3  -7  -1  332.12   12.31
  -3  -7   1  321.29   11.11
   3  -7  -1  358.23   13.83
  -3  -7   1  292.62   12.05
   2   7  -1   15.49    5.69
  -2   7   1    9.52    5.27
   2  -7  -1   13.31    5.22
  -2  -7   1   16.15    4.57
   2  -7  -1   16.30    6.12
  -2  -7   1   14.55    6.24
   1   7  -1 2313.73   49.30
  -1   7   1 2314.40   50.12
   1  -7  -1 2312.59   53.55
  -1  -7   1 2356.94   56.44
   1  -7  -1 2345.57   51.90
  -1  -7   1 2340.52   52.42
   0   7  -1 1207.88   30.06
   0   7   1 1166.49   28.03
   0  -7  -1 1173.58   29.66
   0  -7   1 1166.64   30.79
   0  -7   1 1239.83   31.37
   0  -7  -1 1197.51   30.13
  -1   7  -1  399.80   14.46
   1   7   1  417.68   14.00
  -1  -7  -1  407.50   13.95
   1  -7   1  391.36   13.67
   1  -7   1  406.49   16.41
  -1  -7  -1  424.14   15.26
  -2   7  -1   39.19    6.35
   2   7   1   40.76    5.80
   2  -7   1   38.57    6.09
  -2  -7  -1   30.34    4.31
   2  -7   1   34.99    8.63
  -2  -7  -1   38.16    6.38
  -3   7  -1  184.44    9.31
   3   7   1  173.56    9.19
   3  -7   1  164.18    8.64
  -3  -7  -1  164.17    7.59
   3  -7   1  164.31   10.26
  -3  -7  -1  160.79    9.19
  -4   7  -1  224.35   10.36
   4   7   1  225.18    9.97
   4  -7   1  207.55    9.14
  -4  -7  -1  189.53    8.39
   4  -7   1  214.62   11.66
  -4  -7  -1  235.85   10.59
  -5   7  -1  484.58   14.71
   5   7   1  456.71   14.02
   5   7   1  408.14   16.20
   5  -7   1  431.95   14.16
   5  -7   1  408.31   15.39
  -5  -7  -1  462.71   14.37
  -6   7  -1   36.72    6.05
   6   7   1   38.05    5.86
   6   7   1   29.99    6.21
   6  -7   1   31.75    5.36
   6  -7   1   28.24    6.85
  -6  -7  -1   23.83    5.93
  -7   7  -1   69.96    7.18
   7   7   1   69.82    7.35
   7   7   1   52.90    7.84
   7  -7   1   67.53    8.38
  -7  -7  -1   64.17    6.34
  -7   7  -1   64.31    7.08
  -8   7  -1  331.34   14.03
   8   7   1  356.40   14.53
   8   7   1  263.10   16.60
   8  -7   1  363.24   15.57
  -8  -7  -1  358.00   14.24
  -9   7  -1  261.08   13.54
   9   7   1  265.91   12.56
   9   7   1  255.18   15.08
   9  -7   1  272.06   14.09
  -9  -7  -1  271.93   12.95
  -9   7  -1  265.39   13.17
 -10   7  -1    2.49    5.64
  10   7   1    3.03    5.26
  10   7   1   -2.00    7.66
  10  -7   1    7.76    5.57
 -10  -7  -1  -11.96    8.78
 -10   7  -1    9.38    5.84
 -11   7  -1   53.24    6.37
  11   7   1   72.48    7.48
  11   7   1   74.17    9.17
  11  -7   1   79.83    9.54
 -11  -7  -1   75.22    8.71
 -11   7  -1   74.05   10.04
  12   7   1  103.29    9.46
  12   7   1   97.85    9.78
  12  -7   1   95.64   11.25
 -12  -7  -1  111.11   10.05
 -12   7  -1   90.57    9.69
  13   7   1  105.64    9.55
  13   7   1   99.64   10.47
  13  -7   1  112.43   10.00
 -13  -7  -1  121.10   10.90
 -13   7  -1  115.57   12.09
  14   7   1  324.96   17.33
  14   7   1  285.84   15.89
  14  -7   1  358.91   17.32
 -14  -7  -1  339.00   16.31
 -14   7  -1  370.29   19.36
  15   7   1   -0.13    7.18
  15  -7   1    0.75   11.19
 -15  -7  -1   -4.87    9.62
 -15   7  -1  -10.26    8.25
  16   7   1   -2.23   10.48
  16  -7   1    0.21   10.83
 -16  -7  -1    4.61    9.12
 -16   7  -1   -2.93    8.85
  17   7   1   -0.68   12.78
  17  -7   1    2.22   10.39
 -17  -7  -1   -1.19    9.29
 -17   7  -1    8.40   10.74
  18  -7   1   67.56   11.55
 -18  -7  -1   47.96   10.62
 -18   7  -1   40.54   12.84
  18  -8  -1   10.19   11.98
 -18  -8   1   27.26   11.51
 -18   8   1   24.93   12.00
  17   8  -1   18.21   14.38
  17  -8  -1   45.63   14.37
 -17  -8   1   40.59   13.33
 -17   8   1   43.97   11.76
  16   8  -1   29.36    9.25
  16  -8  -1   42.76   12.64
 -16  -8   1   42.49   10.53
 -16   8   1   35.81    9.28
  15   8  -1   68.68    9.94
  15   8  -1   66.18   11.66
  15  -8  -1   53.98    9.54
 -15  -8   1   68.71    9.38
 -15   8   1   61.12    9.40
  14   8  -1  195.44   13.89
  14   8  -1  175.13   14.27
  14  -8  -1  249.46   17.00
 -14  -8   1  236.42   14.31
 -14   8   1  229.28   13.53
  13   8  -1    7.69    8.36
  13   8  -1    9.70   10.27
  13  -8  -1    9.83   10.60
 -13  -8   1    7.94    8.19
 -13   8   1    0.83    6.21
  12   8  -1    7.03    7.68
  12   8  -1   -2.99    7.69
  12  -8  -1    1.12    7.06
 -12  -8   1   -1.02    7.68
 -12   8   1    3.60    7.76
 -11   8   1   64.62    7.43
  11   8  -1   88.76    8.65
  11   8  -1   95.63   11.18
  11  -8  -1  105.59    9.67
 -11  -8   1   99.66   10.49
 -11   8   1  101.63    9.83
 -10   8   1  217.89   11.77
  10   8  -1  237.63   11.91
  10   8  -1  218.82   12.83
  10  -8  -1  247.81   14.05
 -10  -8   1  215.57   11.24
 -10   8   1  258.90   12.09
  -9   8   1  453.50   19.58
   9   8  -1  457.05   18.63
   9   8  -1  499.78   19.65
   9  -8  -1  559.19   22.83
  -9  -8   1  524.99   19.58
  -9   8   1  569.62   22.09
  -8   8   1  159.88    9.40
   8   8  -1  159.76   10.80
   8   8  -1  162.23   10.48
   8  -8  -1  171.99   11.60
   8  -8  -1  153.98   11.91
  -8  -8   1  170.38    9.78
  -7   8   1    2.64    5.77
   7   8  -1   13.66    7.59
   7   8  -1    4.28    6.80
   7  -8  -1    2.63    6.48
   7  -8  -1   -0.03    8.92
  -7  -8   1    5.43    6.85
  -6   8   1  356.29   12.27
   6  -8  -1  471.67   19.11
   6  -8  -1  468.57   19.24
  -6  -8   1  469.76   17.62
  -5   8   1  633.47   22.57
   5   8  -1  645.06   21.84
   5  -8  -1  641.44   22.55
  -5  -8   1  605.30   20.60
   5  -8  -1  649.53   23.16
  -5  -8   1  659.09   21.84
   4   8  -1  521.71   16.58
  -4   8   1  579.31   17.22
   4  -8  -1  506.53   15.70
  -4  -8   1  490.17   14.18
   4  -8  -1  556.11   17.73
  -4  -8   1  556.85   16.40
   3   8  -1  174.31   10.19
  -3   8   1  184.26    9.04
   3  -8  -1  175.45    9.16
  -3  -8   1  160.89    7.83
   3  -8  -1  161.99   10.18
  -3  -8   1  172.64   10.03
   2   8  -1  597.82   15.63
  -2   8   1  563.62   17.19
   2  -8  -1  618.56   17.97
  -2  -8   1  598.39   16.85
   2  -8  -1  616.87   18.26
  -2  -8   1  595.63   17.36
   1   8  -1 1450.70   30.08
  -1   8   1 1385.80   28.63
   1  -8  -1 1385.29   28.70
  -1  -8   1 1273.31   30.04
   1  -8  -1 1386.84   28.49
   0   8  -1 3039.73   56.37
   0   8   1 3217.78   57.46
   0  -8  -1 3240.47   52.28
   0  -8   1 3199.95   58.80
   0  -8   1 3025.13   51.71
   0  -8  -1 3156.51   50.28
  -1   8  -1 1410.93   30.19
   1   8   1 1325.57   23.74
  -1  -8  -1 1415.58   28.71
   1  -8   1 1334.21   29.14
   1  -8   1 1382.77   35.51
  -1  -8  -1 1335.78   28.78
  -2   8  -1   89.12    7.42
   2   8   1   82.57    6.46
   2  -8   1   87.51    6.72
  -2  -8  -1   91.48    6.51
   2  -8   1   85.85    7.86
  -2  -8  -1   89.98    9.22
  -3   8  -1  386.06   13.51
   3   8   1  400.81   12.83
   3  -8   1  379.82   13.16
  -3  -8  -1  363.63   11.62
   3  -8   1  403.03   15.46
  -3  -8  -1  433.98   13.80
  -4   8  -1  724.35   23.73
   4   8   1  730.63   23.29
   4  -8   1  714.41   23.98
  -4  -8  -1  652.14   21.12
   4  -8   1  683.68   26.94
  -4  -8  -1  738.89   24.80
  -5   8  -1   83.97    7.70
   5   8   1   85.07    7.93
   5  -8   1   77.06    7.63
  -5  -8  -1   79.96    6.19
   5  -8   1   90.94    9.77
  -5  -8  -1   95.19    8.75
  -6   8  -1   20.21    6.64
   6   8   1   19.32    5.99
   6   8   1   13.77    5.22
   6  -8   1   11.19    5.57
   6  -8   1   23.00    7.36
  -6  -8  -1   22.75    7.78
  -7   8  -1   49.11    8.33
   7   8   1   47.31    6.97
   7   8   1   37.23    7.15
   7  -8   1   44.23    6.93
  -7  -8  -1   44.27    8.53
  -7   8  -1   54.32    8.32
  -8   8  -1  166.50    9.98
   8   8   1  139.18    8.74
   8   8   1  123.81   10.40
   8  -8   1  161.31    9.82
  -8  -8  -1  139.92    8.34
  -8   8  -1  119.20    9.33
  -9   8  -1 1694.90   48.37
   9   8   1 1729.37   40.68
   9  -8   1 1713.70   40.21
  -9  -8  -1 1695.78   34.26
  -9   8  -1 1813.17   33.18
 -10   8  -1  351.59   18.82
  10   8   1  401.34   18.26
  10   8   1  302.94   18.00
  10  -8   1  427.68   20.50
 -10  -8  -1  354.21   15.31
 -10   8  -1  433.34   19.16
 -11   8  -1  110.14    9.23
  11   8   1  156.84   10.20
  11   8   1  113.16   11.33
  11  -8   1  155.01   10.13
 -11  -8  -1  154.46   10.52
  12   8   1   -0.69    6.01
  12   8   1   -0.09    8.77
  12  -8   1   -7.60    9.20
 -12  -8  -1    5.48    7.83
 -12   8  -1    7.46    8.15
  13   8   1  112.19    9.59
  13   8   1   91.29   11.55
  13  -8   1  105.31   11.02
 -13  -8  -1  124.72   12.29
 -13   8  -1  134.43   12.52
  14   8   1  110.54   10.08
  14   8   1   84.60   13.53
  14  -8   1   68.20    9.56
 -14  -8  -1  121.98   11.70
 -14   8  -1  143.41   11.60
  15  -8   1   33.98   11.41
 -15  -8  -1   40.55   10.08
 -15   8  -1   35.55    7.99
  16  -8   1   25.25    9.58
 -16  -8  -1   24.85    9.06
 -16   8  -1   29.31   10.36
  17  -8   1   26.21   11.35
 -17  -8  -1   26.70    8.53
 -17   8  -1   36.41   12.23
  18  -8   1   40.48   13.84
 -18  -8  -1   33.85    8.92
 -18   8  -1   38.31   13.41
  18  -9  -1  136.10   17.39
 -18  -9   1  114.29   12.91
 -18   9   1  117.93   14.40
  17  -9  -1   17.45    9.96
 -17  -9   1   18.90   11.63
 -17   9   1   24.41   10.23
  16  -9  -1    0.21    9.53
 -16  -9   1   -7.00   11.76
 -16   9   1   -8.00   10.81
  15   9  -1   10.83   10.17
  15   9  -1   15.65    8.96
  15  -9  -1    3.31   12.38
 -15  -9   1   12.57    8.38
 -15   9   1    4.50    9.78
  14   9  -1   19.36    8.51
  14   9  -1   -4.04    8.93
  14  -9  -1    7.37    8.49
 -14  -9   1   10.90    9.37
 -14   9   1   15.47    8.59
  13   9  -1   68.55    8.80
  13   9  -1   52.39    9.93
  13  -9  -1   67.83   10.49
 -13  -9   1   74.24   11.24
 -13   9   1   49.79    8.97
  12   9  -1   70.00   10.10
  12   9  -1   38.14    9.31
  12  -9  -1   78.26   13.92
 -12  -9   1   77.94   10.73
 -12   9   1   64.60    8.76
 -11   9   1   -0.14    5.57
  11   9  -1    8.40    8.05
  11   9  -1   -5.52    8.06
  11  -9  -1   -4.63    7.56
 -11  -9   1   -0.88    6.12
 -11   9   1    7.16    8.38
 -10   9   1  389.92   19.14
  10   9  -1  409.68   21.68
  10  -9  -1  421.41   19.33
 -10  -9   1  411.29   18.10
  -9   9   1   83.81    9.22
   9   9  -1   79.06    9.25
   9   9  -1   72.23    9.95
   9  -9  -1   71.16    8.88
   9  -9  -1   68.95    8.44
  -9  -9   1   71.42    7.01
  -8   9   1    1.71    6.05
   8   9  -1   -4.71    5.54
   8   9  -1   -0.89    5.95
   8  -9  -1   -0.52    6.82
   8  -9  -1   -1.57   10.00
  -8  -9   1   -2.84    7.19
  -7   9   1   52.09    8.49
   7   9  -1   56.42    9.00
   7  -9  -1   41.46    7.04
  -7  -9   1   44.06    6.00
   7  -9  -1   58.22    7.97
  -7  -9   1   56.28    8.49
  -6   9   1  229.17   11.77
   6   9  -1  221.87    9.69
   6  -9  -1  208.40   10.49
  -6  -9   1  222.71   10.04
   6  -9  -1  225.17   13.02
  -6  -9   1  212.11   10.88
  -5   9   1   37.89    6.72
   5   9  -1   38.82    7.13
   5  -9  -1   35.71    8.32
  -5  -9   1   37.74    5.84
   5  -9  -1   33.72   10.44
  -5  -9   1   41.15    7.53
  -4   9   1  413.77   17.28
   4   9  -1  411.39   15.44
   4  -9  -1  377.29   14.19
  -4  -9   1  391.24   14.90
   4  -9  -1  407.73   16.92
  -4  -9   1  394.73   16.38
   3   9  -1   34.46    5.46
  -3   9   1   52.42    8.44
   3  -9  -1   38.14    5.51
  -3  -9   1   38.64    5.46
   3  -9  -1   35.43    7.78
  -3  -9   1   36.73    7.50
   2   9  -1   39.62    6.18
  -2   9   1   43.66    7.15
   2  -9  -1   44.61    6.51
  -2  -9   1   38.77    5.20
   2  -9  -1   40.73    7.74
  -2  -9   1   46.84    7.23
   1   9  -1  450.89   17.59
  -1   9   1  446.60   16.81
   1  -9  -1  491.16   18.50
  -1  -9   1  467.23   17.36
   1  -9  -1  449.96   17.61
  -1  -9   1  495.88   18.60
   0   9  -1  554.35   19.18
   0   9   1  565.06   18.82
   0  -9  -1  557.24   18.94
   0  -9   1  578.02   19.94
   0  -9   1  543.57   20.87
   0  -9  -1  566.84   20.26
  -1   9  -1   85.78    8.09
   1   9   1  100.45    8.61
  -1  -9  -1   87.66    6.64
   1  -9   1   95.33    7.63
   1  -9   1   94.43    8.71
  -1  -9  -1   98.45    8.61
  -2   9  -1   20.89    6.95
   2   9   1   21.89    6.94
   2  -9   1   20.03    6.66
   2  -9   1   22.64    5.95
  -2  -9  -1   20.34    7.60
  -3   9  -1   35.56    6.32
   3   9   1   42.62    6.88
   3  -9   1   45.99    6.81
   3  -9   1   52.09    8.66
  -3  -9  -1   40.38    8.71
  -4   9  -1   57.30    7.13
   4   9   1   49.41    6.85
   4  -9   1   63.89    7.81
   4  -9   1   59.74    9.69
  -4  -9  -1   61.23    7.75
  -5   9  -1  151.76   10.14
   5   9   1  141.28    8.04
   5  -9   1  148.00    8.67
   5  -9   1  163.27   12.42
  -5  -9  -1  160.17    9.58
  -6   9  -1   23.30    7.10
   6   9   1   15.89    5.56
   6  -9   1   17.01    7.92
   6  -9   1   15.52    9.39
  -6  -9  -1   23.23    8.25
  -7   9  -1   12.74    8.10
   7   9   1    9.20    5.47
   7   9   1   11.39    6.49
   7  -9   1   20.86    7.82
   7  -9   1   10.10    8.71
  -7  -9  -1   15.89    7.93
  -8   9  -1  232.94   12.75
   8   9   1  228.95   10.94
   8   9   1  164.10   13.42
   8  -9   1  239.55   13.33
  -8  -9  -1  211.24   10.80
  -8   9  -1  249.81   11.86
  -9   9  -1  151.48   11.97
   9   9   1  150.95    9.66
   9   9   1  115.25   10.98
   9  -9   1  166.07   10.67
  -9  -9  -1  152.16    9.68
  -9   9  -1  115.97   12.46
 -10   9  -1  185.40   14.26
  10   9   1  207.06   14.59
  10   9   1  127.78   11.61
  10  -9   1  218.13   16.71
 -10  -9  -1  178.80   13.36
 -10   9  -1  127.34   13.24
 -11   9  -1   22.20    7.86
  11   9   1   23.64    7.92
  11   9   1   12.29    7.55
  11  -9   1   22.34    6.51
 -11  -9  -1   27.35    9.55
 -11   9  -1   21.64    8.60
  12   9   1   -0.78    7.03
  12  -9   1   -4.87   10.53
 -12  -9  -1   -0.87    7.79
 -12   9  -1    3.17    7.67
  13   9   1   54.22    8.93
  13  -9   1   51.81   11.97
 -13  -9  -1   33.74    7.99
 -13   9  -1   49.74   10.73
  14   9   1   70.69    9.32
  14  -9   1   57.50   11.86
 -14  -9  -1   74.58    9.77
 -14   9  -1   72.37   10.35
  15  -9   1    5.84   13.90
 -15  -9  -1   -3.95    6.93
 -15   9  -1    3.01    8.38
  16  -9   1   36.80   16.55
 -16  -9  -1   19.45   10.35
 -16   9  -1   25.58   10.17
  17  -9   1  131.81   15.62
 -17  -9  -1  135.61   11.39
 -17   9  -1  142.73   14.66
  17 -10  -1   22.00   11.93
 -17 -10   1    2.67   11.94
 -17  10   1   18.55   12.12
  16 -10  -1    5.05   13.63
 -16 -10   1   11.64   11.18
 -16  10   1    2.85   13.63
  15  10  -1   -4.94    9.42
  15 -10  -1    3.14   16.01
 -15 -10   1   -7.11    8.52
 -15  10   1   -1.31   13.67
  14  10  -1   70.76    9.93
  14 -10  -1   82.77   10.06
 -14 -10   1   85.12   12.17
 -14  10   1   75.27   11.64
  13  10  -1   -0.25    9.50
  13 -10  -1    6.68    9.96
 -13 -10   1  -14.39    9.59
 -13  10   1    7.65    9.68
  12  10  -1   -3.25    8.99
  12  10  -1    6.11    9.11
  12 -10  -1   -6.89   12.44
 -12 -10   1    4.49    7.66
 -12  10   1    0.19    9.01
 -11  10   1   35.14    8.35
  11  10  -1   49.54    9.15
  11  10  -1   32.13    9.52
  11 -10  -1   50.36    8.41
 -11 -10   1   48.62    9.18
 -11  10   1   60.64    7.93
 -10  10   1    9.89    7.19
  10  10  -1   28.00    6.53
  10  10  -1   14.41    7.97
  10 -10  -1   33.78    8.48
 -10 -10   1   18.94    8.24
 -10  10   1   21.10    9.28
  -9  10   1  151.94   12.30
   9  10  -1  179.88   14.27
   9 -10  -1  182.84   14.77
   9 -10  -1  189.79   16.83
  -9 -10   1  172.55   11.47
  -8  10   1   98.87    9.31
   8  10  -1  112.73    8.79
   8 -10  -1  130.38   10.20
  -8 -10   1   95.96    8.05
   8 -10  -1  117.97   11.57
  -8 -10   1  101.02    9.01
  -7  10   1   37.24    7.89
   7  10  -1   39.78    7.74
   7 -10  -1   48.22    8.23
  -7 -10   1   42.35    6.02
   7 -10  -1   47.29   10.02
  -7 -10   1   37.85    7.89
  -6  10   1  138.96   10.52
   6  10  -1  127.89    9.29
   6 -10  -1  138.02    9.79
  -6 -10   1  129.35    7.74
   6 -10  -1  127.04    9.61
  -6 -10   1  136.97   10.74
  -5  10   1  101.45   10.63
   5  10  -1   86.17    9.28
   5 -10  -1   90.07    8.18
  -5 -10   1   77.53    6.18
   5 -10  -1   80.81    8.58
  -5 -10   1   94.05    9.71
  -4  10   1   -2.60    6.89
   4  10  -1    2.17    7.27
   4 -10  -1    5.36    6.42
  -4 -10   1   -0.54    3.43
   4 -10  -1   -1.49    7.85
  -4 -10   1    3.21    7.30
   3  10  -1  124.53    8.23
  -3  10   1  123.79    9.32
   3 -10  -1  116.77    7.93
  -3 -10   1  108.22    6.90
   3 -10  -1  132.84   10.47
  -3 -10   1  110.32    8.93
   2  10  -1   24.13    7.49
  -2  10   1    3.80    6.72
   2 -10  -1    8.00    5.23
  -2 -10   1    5.44    5.22
   2 -10  -1    6.62    6.08
  -2 -10   1    8.57    7.11
   1  10  -1  446.59   17.60
  -1  10   1  451.27   17.82
   1 -10  -1  439.55   16.80
  -1 -10   1  417.68   16.17
   1 -10  -1  452.74   18.39
  -1 -10   1  433.22   17.34
   0  10  -1  501.47   17.48
   0  10   1  476.34   17.45
   0 -10  -1  458.20   16.48
   0 -10   1  515.96   18.13
   0 -10   1  409.57   18.60
   0 -10  -1  508.75   18.91
  -1  10  -1  250.74   12.09
   1  10   1  248.79   10.60
   1 -10   1  229.14   11.07
   1 -10   1  224.28   12.03
  -1 -10  -1  219.48   11.50
  -2  10  -1   78.90    7.19
   2  10   1   79.08    7.46
   2 -10   1   68.43    7.97
   2 -10   1   80.32    9.79
  -2 -10  -1   77.10    9.17
  -3  10  -1   77.18    8.13
   3  10   1   63.68    7.26
   3 -10   1   78.84    7.17
   3 -10   1   74.73   10.40
  -3 -10  -1   81.53    8.35
  -4  10  -1   35.43    6.34
   4  10   1   40.33    7.82
   4 -10   1   42.63    7.03
   4 -10   1   35.70    8.34
  -4 -10  -1   44.41    9.75
  -5  10  -1   48.82    7.16
   5  10   1   45.70    7.40
   5 -10   1   47.65    6.29
   5 -10   1   54.61    9.98
  -5 -10  -1   46.16    7.21
  -6  10  -1   21.29    6.90
   6  10   1   24.89    7.01
   6 -10   1   19.08    6.08
   6 -10   1   18.85    9.26
  -6 -10  -1   19.73    8.44
  -7  10  -1   25.85    8.18
   7  10   1   22.49    8.48
   7 -10   1   29.43    6.95
   7 -10   1   23.68   10.29
  -7 -10  -1   27.88    9.26
  -8  10  -1   -3.28    8.54
   8  10   1   -2.09    6.96
   8 -10   1   -3.25    6.22
  -8 -10  -1    0.71    5.80
  -8  10  -1    6.89    6.34
  -9  10  -1  213.97   12.14
   9  10   1  199.95   12.49
   9 -10   1  189.87   12.46
  -9 -10  -1  193.49   10.66
  -9  10  -1  211.10   11.73
 -10  10  -1   34.44    8.98
  10  10   1   36.68    7.11
  10 -10   1   30.49    9.31
 -10 -10  -1   37.13    7.43
 -10  10  -1   39.43    6.82
 -11  10  -1   49.76   10.42
  11  10   1   33.92    6.94
  11 -10   1   78.76    8.81
 -11 -10  -1   74.88   10.37
 -11  10  -1   69.47    9.62
  12  10   1   19.14    6.97
  12 -10   1   22.47   10.66
 -12 -10  -1   13.32    8.94
 -12  10  -1   18.54    9.70
  13  10   1   82.72   10.35
  13 -10   1  102.50   13.56
 -13 -10  -1  100.41    9.22
 -13  10  -1  123.28   13.06
  14  10   1   -6.77    8.64
  14 -10   1   -6.83   12.10
 -14 -10  -1   -3.11    7.15
 -14  10  -1   10.64   12.06
  15 -10   1   -5.65   10.73
 -15 -10  -1  -11.32    8.65
 -15  10  -1    8.39   13.40
  16 -10   1    0.34   12.85
 -16 -10  -1   10.73    8.40
 -16  10  -1    5.45   11.68
  16 -11  -1    3.90   12.37
 -16 -11   1   -7.74    9.50
 -16  11   1    6.54   11.27
  15 -11  -1   64.09   15.65
 -15 -11   1   98.04   12.56
 -15  11   1  103.63   13.62
  14  11  -1    8.02    9.63
  14 -11  -1    5.10    8.67
 -14 -11   1    4.65   12.10
 -14  11   1   -1.99   10.06
  13  11  -1   97.14   12.68
  13 -11  -1   98.11   13.64
 -13 -11   1   81.13   11.44
 -13  11   1   60.26    9.45
  12  11  -1    5.54   11.13
  12 -11  -1   12.26   10.45
 -12 -11   1    9.20    7.03
 -12  11   1    6.46    9.62
 -11  11   1   80.43   11.42
  11  11  -1   57.84    9.63
  11 -11  -1  101.64   10.43
 -11 -11   1  100.80   11.26
 -11  11   1   56.45    9.65
 -10  11   1    4.60    8.81
  10  11  -1   -0.65    9.28
  10 -11  -1    1.09    9.75
 -10 -11   1   -4.20    8.57
 -10  11   1    6.44    7.33
  -9  11   1  168.04   12.04
   9  11  -1  149.19    9.91
   9 -11  -1  173.94   12.89
   9 -11  -1  209.95   15.05
  -9 -11   1  190.90   11.70
  -8  11   1   -4.31    7.46
   8  11  -1    4.34    9.06
   8 -11  -1   -1.33    5.91
   8 -11  -1   14.25   10.08
  -8 -11   1    0.24    9.42
  -7  11   1   28.73    8.46
   7  11  -1   37.76   10.27
   7 -11  -1   27.67    7.58
   7 -11  -1   28.68    8.61
  -7 -11   1   42.15    9.89
  -6  11   1    1.19    8.59
   6  11  -1    3.88    8.25
   6 -11  -1    3.78    7.19
  -6 -11   1    5.22    4.50
   6 -11  -1    6.42    8.48
  -6 -11   1    1.25    9.82
  -5  11   1    3.30    7.00
   5  11  -1   -2.79    5.70
   5 -11  -1   -1.19    5.10
  -5 -11   1    0.21    3.96
   5 -11  -1   -2.19    8.58
  -5 -11   1    7.35   10.67
  -4  11   1   -0.41    7.41
   4  11  -1    7.11    9.81
   4 -11  -1    2.36    6.49
  -4 -11   1   -4.61    4.01
   4 -11  -1    2.72    6.48
  -4 -11   1   -4.50    9.44
   3  11  -1    4.12    7.85
  -3  11   1   20.88    6.90
   3 -11  -1   -0.36    5.39
  -3 -11   1    7.92    4.76
   3 -11  -1    3.88    6.41
  -3 -11   1   13.69    7.71
   2  11  -1   22.77    7.46
  -2  11   1   12.69    7.72
   2 -11  -1   16.68    5.87
  -2 -11   1   20.77    5.45
   2 -11  -1   14.45    6.36
  -2 -11   1   11.52    7.29
   1  11  -1   90.22   10.09
  -1  11   1   89.39    8.99
   1 -11  -1   89.85    7.84
  -1 -11   1   96.41    7.23
   1 -11  -1   84.14    8.43
  -1 -11   1   94.74    9.29
   0  11  -1   55.80    6.87
   0  11   1   49.34    7.55
   0 -11   1   46.39    6.15
   0 -11   1   55.35    9.25
   0 -11  -1   42.53    8.11
  -1  11  -1   22.36    8.46
   1  11   1   44.90    7.76
   1 -11   1   32.87    6.53
   1 -11   1   40.90    8.27
  -1 -11  -1   33.68    9.38
  -2  11  -1   17.72    8.90
   2  11   1   20.16    7.11
   2 -11   1   11.47    6.14
   2 -11   1   23.70    8.05
  -2 -11  -1   18.68    7.19
  -3  11  -1   26.61    7.66
   3  11   1   19.70    8.08
   3 -11   1   20.03    7.75
   3 -11   1   21.52    8.01
  -3 -11  -1   20.43    6.59
  -4  11  -1   56.05    9.27
   4  11   1   59.83    7.89
   4 -11   1   70.29    7.92
   4 -11   1   72.94   10.21
  -4 -11  -1   63.17    7.92
  -5  11  -1   48.44    7.72
   5  11   1   44.25    8.27
   5 -11   1   40.36    7.45
   5 -11   1   49.29   10.31
  -5 -11  -1   43.90   11.35
  -6  11  -1   31.35    7.53
   6  11   1   33.15    8.58
   6 -11   1   25.66    6.91
   6 -11   1   34.70   12.24
  -6 -11  -1   25.34    9.33
  -7  11  -1   31.14    9.11
   7  11   1   27.02    8.46
   7 -11   1   28.64    6.61
   7 -11   1   20.30    9.51
  -7 -11  -1   21.86    8.60
  -8  11  -1  171.20   12.04
   8  11   1  145.87    8.75
   8 -11   1  149.98   10.66
  -8 -11  -1  136.22    9.94
  -8  11  -1  172.15   12.03
  -9  11  -1    7.70    8.40
   9  11   1   19.80    9.12
   9 -11   1   19.22    7.31
  -9 -11  -1   16.83    8.71
  -9  11  -1   30.62    9.46
 -10  11  -1   30.70    7.57
  10  11   1   38.29    8.19
  10 -11   1   39.63   10.97
 -10 -11  -1   41.39    9.72
 -10  11  -1   44.38   10.45
  11  11   1    2.45    7.78
  11 -11   1   -0.19   10.87
 -11 -11  -1    2.62    7.39
 -11  11  -1   -0.89    8.46
  12  11   1   -8.22    8.68
  12 -11   1    2.37    9.42
 -12 -11  -1   -6.61   10.96
 -12  11  -1   -2.73   11.00
  13  11   1   34.17    8.41
  13 -11   1   28.73   10.39
 -13 -11  -1   35.37   11.44
 -13  11  -1   24.47    8.83
  14  11   1    3.81   10.31
  14 -11   1    4.42   12.23
 -14 -11  -1    4.60   11.57
 -14  11  -1   10.06    8.31
  15 -11   1   21.03   10.53
 -15 -11  -1    2.78    8.11
 -15  11  -1    5.27   10.96
  15 -12  -1   29.53   11.91
 -15 -12   1   25.63   11.52
 -15  12   1   45.55   12.56
  14  12  -1   11.32    8.57
  14 -12  -1   20.14   13.10
 -14 -12   1   24.59    9.65
 -14  12   1    2.24   10.34
  13  12  -1   -0.40    9.64
  13 -12  -1   -7.42    9.94
 -13 -12   1   -0.04   10.99
 -13  12   1   -3.52    8.48
  12  12  -1    6.76    7.91
  12 -12  -1   -0.81    9.19
 -12 -12   1   -6.62    6.94
 -12  12   1   -4.50    9.52
  11  12  -1   32.15    8.88
  11 -12  -1    1.59   10.04
 -11 -12   1   35.60   10.60
 -11  12   1   17.37    8.31
 -10  12   1   -2.04   10.40
  10  12  -1    4.81    9.84
  10 -12  -1    3.41    9.94
 -10 -12   1   -0.52   10.48
 -10  12   1    1.19    9.16
  -9  12   1  235.86   15.79
   9  12  -1  205.63   12.96
   9 -12  -1  228.80   15.51
   9 -12  -1  242.99   16.88
  -9 -12   1  230.76   14.78
  -8  12   1   27.14    8.48
   8  12  -1   34.01    8.33
   8 -12  -1   29.39    8.53
   8 -12  -1   33.71   10.89
  -8 -12   1   27.77    9.30
  -7  12   1   -1.59    9.72
   7  12  -1    5.26    6.52
   7 -12  -1    6.16    8.19
   7 -12  -1   -1.06   10.11
  -7 -12   1   11.63   10.85
  -6  12   1   16.32    6.72
   6  12  -1   30.07    7.68
   6 -12  -1   27.51    8.68
   6 -12  -1   19.50   10.35
  -6 -12   1   27.08   11.49
  -5  12   1   22.73    8.33
   5  12  -1   13.99    8.78
   5 -12  -1    8.34    7.08
   5 -12  -1   16.53    8.52
  -5 -12   1   19.34    7.32
   4  12  -1  124.83    8.86
  -4  12   1  105.33    8.68
   4 -12  -1  116.78    9.19
   4 -12  -1  134.51   11.57
  -4 -12   1  125.87    9.61
   3  12  -1    3.43    8.62
  -3  12   1    6.71    6.45
   3 -12  -1    1.29    5.62
   3 -12  -1    0.78    8.98
  -3 -12   1    0.67    7.87
   2  12  -1   36.79    8.07
  -2  12   1   43.46    8.88
  -2 -12   1   38.61    6.25
   2 -12  -1   39.31    7.53
  -2 -12   1   34.00    9.94
   1  12  -1   72.27    8.86
  -1  12   1   84.77   10.62
  -1 -12   1   60.59    6.42
   1 -12  -1   69.02    9.94
  -1 -12   1   76.71   10.58
   0  12  -1  471.09   19.20
   0  12   1  454.26   20.17
   0 -12   1  490.24   20.35
   0 -12   1  448.49   20.98
   0 -12  -1  429.45   19.90
  -1  12  -1  171.39   12.46
   1  12   1  186.12   12.00
   1 -12   1  173.98   10.76
   1 -12   1  152.54   12.75
  -1 -12  -1  154.14   11.10
  -2  12  -1   12.15   10.47
   2  12   1    6.01    7.08
   2 -12   1   -3.15    5.97
   2 -12   1   13.16   10.42
  -2 -12  -1   21.39    9.63
  -3  12  -1   -3.28    8.32
   3  12   1   11.61    8.43
   3 -12   1    6.51    7.29
   3 -12   1   -5.53   10.92
  -3 -12  -1    5.70    9.29
  -4  12  -1  103.74   11.28
   4  12   1   99.69    9.80
   4 -12   1  105.91    9.96
   4 -12   1   98.88   12.69
  -4 -12  -1  118.84    9.68
  -5  12  -1   15.99    9.64
   5  12   1   40.25    7.36
   5 -12   1   19.33    8.66
   5 -12   1   22.34   10.00
  -5 -12  -1   38.04    9.90
  -6  12  -1   21.15    6.75
   6  12   1   22.67    7.31
   6 -12   1   16.54    8.63
   6 -12   1   11.73    7.62
  -6 -12  -1   14.09   10.15
  -7  12  -1    4.97    7.98
   7  12   1   -1.39    6.46
   7 -12   1    5.38    7.71
   7 -12   1    6.29   11.18
  -7 -12  -1    9.00    9.26
  -8  12  -1  114.67   11.35
   8  12   1  112.91    9.74
   8 -12   1  110.01   11.73
   8 -12   1  144.50   14.35
  -8 -12  -1  133.19   13.10
  -9  12  -1  189.17   12.76
   9  12   1  233.12   15.02
   9 -12   1  192.42   14.62
  -9 -12  -1  190.67   14.35
  -9  12  -1  230.49   15.54
 -10  12  -1   74.21    9.12
  10  12   1   99.63    8.58
  10 -12   1   99.27   10.94
 -10 -12  -1   81.32   10.83
 -10  12  -1  111.55   10.22
  11  12   1    6.37    9.00
  11 -12   1    0.80    9.71
 -11 -12  -1    0.52   11.34
 -11  12  -1   -3.92    6.74
  12  12   1   11.26   11.28
  12 -12   1   -8.01   11.14
 -12 -12  -1    1.44    8.96
 -12  12  -1    0.55   10.87
  13  12   1   28.71   11.66
  13 -12   1   43.02   13.23
 -13 -12  -1   60.56   10.23
 -13  12  -1   46.22   12.32
  14  12   1   -0.05    9.95
  14 -12   1    4.56   11.25
 -14 -12  -1   14.68   10.14
 -14  12  -1   -1.17    9.89
  14  13  -1    7.56   10.66
  14 -13  -1   23.91   11.19
 -14 -13   1   29.66   10.81
 -14  13   1   44.03   12.57
  13  13  -1   57.70   10.67
  13 -13  -1   50.23   16.47
 -13 -13   1   70.58   11.40
 -13  13   1   73.62   11.28
  12  13  -1   14.85   11.42
  12 -13  -1    5.00   10.59
 -12 -13   1    8.60   12.99
 -12  13   1   -9.79   11.41
  11  13  -1   94.66   11.51
  11 -13  -1  103.82   13.85
 -11 -13   1  106.26   12.91
 -11  13   1  113.26   10.95
 -10  13   1   44.36   12.59
  10  13  -1   80.33    9.12
  10 -13  -1   56.27    9.00
  10 -13  -1   36.63   10.56
 -10 -13   1   65.18   11.02
  -9  13   1   52.49    9.83
   9  13  -1   66.43   10.45
   9 -13  -1   66.63   12.17
   9 -13  -1   48.46   13.69
  -9 -13   1   61.25   11.88
  -8  13   1   -2.10    7.62
   8  13  -1    2.24    9.84
   8 -13  -1   12.04    9.56
   8 -13  -1   10.87   12.28
  -8 -13   1   13.21    8.63
  -7  13   1   46.47    9.82
   7  13  -1   38.43    9.43
   7 -13  -1   35.50    9.91
   7 -13  -1   44.26   11.97
  -7 -13   1   45.45    9.66
  -6  13   1   26.95    8.81
   6  13  -1   26.08    9.45
   6 -13  -1   19.59    9.56
   6 -13  -1   20.55   10.09
  -6 -13   1   29.33   10.47
  -5  13   1   -8.98   10.20
   5  13  -1   -6.34    6.85
   5 -13  -1    2.05    7.97
   5 -13  -1    2.83   10.15
  -5 -13   1    0.30   12.48
  -4  13   1  158.13   11.91
   4  13  -1  171.93   11.61
   4 -13  -1  151.50   11.32
  -4 -13   1  161.33   11.92
   3  13  -1   -1.38    6.55
  -3  13   1    7.72    7.63
   3 -13  -1   -5.46   10.37
  -3 -13   1   -5.56    7.01
   2  13  -1    1.35    6.70
  -2  13   1    8.18    7.39
   2 -13  -1    5.04    9.94
  -2 -13   1    1.77    8.00
   1  13  -1   99.67    9.01
  -1  13   1  109.06   11.34
   1 -13  -1   80.98    9.69
  -1 -13   1  102.17   11.35
   0  13  -1  179.63   13.11
   0  13   1  179.59   12.83
   0 -13   1  184.61   10.46
   0 -13   1  128.39   10.28
   0 -13  -1  150.98   10.93
  -1  13  -1   53.54   10.40
   1  13   1   44.77    9.63
   1 -13   1   33.45    7.75
  -1 -13  -1   42.72    7.92
  -2  13  -1   -1.45   10.16
   2  13   1    4.43    8.74
   2 -13   1   -9.50    9.97
  -2 -13  -1    1.34    6.55
  -3  13  -1   47.85    8.63
   3  13   1   44.67    7.89
   3 -13   1   46.73    8.98
   3 -13   1   30.80    9.52
  -3 -13  -1   37.04   10.23
  -4  13  -1   78.80   10.95
   4  13   1   77.37    9.62
   4 -13   1   81.88   10.01
   4 -13   1   55.94    9.16
  -4 -13  -1   67.90    8.94
  -5  13  -1   63.73   12.24
   5  13   1   67.50    8.41
   5 -13   1   68.30    9.39
   5 -13   1   62.80   11.85
  -5 -13  -1   78.95    9.55
  -6  13  -1   77.34   13.34
   6  13   1   62.72    8.41
   6 -13   1   74.08    8.12
   6 -13   1   71.28   11.75
  -6 -13  -1   72.08    9.55
  -7  13  -1   16.10    8.50
   7  13   1   15.55    6.32
   7 -13   1   18.24    9.19
   7 -13   1    1.98    8.71
  -7 -13  -1   16.27   10.02
  -8  13  -1  216.22   14.81
   8  13   1  225.57   13.63
   8 -13   1  184.38   14.33
   8 -13   1  139.59   16.71
  -8 -13  -1  251.23   14.22
  -9  13  -1  111.57   12.84
   9  13   1  128.78   12.76
   9 -13   1   87.19   10.07
  -9 -13  -1  140.76   14.77
  -9  13  -1  110.09   12.35
 -10  13  -1  105.83   12.62
  10  13   1  138.41   11.05
  10 -13   1  127.12   11.18
 -10 -13  -1  138.70   12.05
 -10  13  -1  160.52   15.16
  11  13   1   43.45   11.12
  11 -13   1   57.20   10.55
 -11 -13  -1   44.13    9.70
 -11  13  -1   36.48    9.62
  12  13   1   -0.60   10.45
  12 -13   1   -1.42    9.33
 -12 -13  -1    3.81   14.02
 -12  13  -1   -2.48   12.83
  13  13   1   31.52   12.67
  13 -13   1   34.11   10.96
 -13 -13  -1   15.45   15.77
 -13  13  -1   31.01   13.69
  13  14  -1    3.40   12.81
 -13 -14   1   -0.91   10.90
 -13  14   1    2.67   13.93
  12  14  -1   -4.15   10.72
 -12 -14   1  -14.71   11.07
 -12  14   1  -12.06   10.28
  11  14  -1   45.17   10.07
 -11 -14   1   32.88   10.89
 -11  14   1   31.82   11.66
  10  14  -1   -0.47   13.23
  10 -14  -1   23.54   12.24
  10 -14  -1   18.06   15.16
 -10 -14   1    9.46   10.50
  -9  14   1  182.87   12.78
   9  14  -1  187.09   12.84
   9 -14  -1  139.21   13.87
  -9 -14   1  161.81   14.46
  -8  14   1   11.75    9.40
   8  14  -1   18.15    7.61
   8 -14  -1    7.26   10.89
  -8 -14   1   44.41   12.56
  -7  14   1    4.75    7.31
   7  14  -1    6.40    9.46
   7 -14  -1   -0.64   11.84
  -7 -14   1   -2.33    9.57
  -6  14   1  121.46   12.58
   6  14  -1  125.82   10.34
   6 -14  -1  143.65   13.96
  -6 -14   1   93.53   12.28
  -5  14   1  170.46   13.40
   5  14  -1  166.31   15.41
   5 -14  -1  194.22   15.68
  -5 -14   1  157.47   15.90
  -4  14   1   -2.86    9.28
   4  14  -1    7.23    7.58
   4 -14  -1   -4.49   10.67
  -4 -14   1   -2.38    9.25
   3  14  -1   79.21   12.55
  -3  14   1   50.49   10.45
   3 -14  -1   69.05   11.91
  -3 -14   1   68.75   13.14
   2  14  -1   68.88   12.22
  -2  14   1   69.91    9.30
   2 -14  -1   72.33   11.22
  -2 -14   1   63.86   13.59
   1  14  -1   91.79   11.16
  -1  14   1   81.45   10.49
   1 -14  -1  113.51   12.49
  -1 -14   1  113.82   14.21
   0  14  -1  434.57   22.00
   0  14   1  393.23   19.26
   0 -14   1  416.48   20.35
   0 -14  -1  441.90   20.56
  -1  14  -1  239.95   13.10
   1  14   1  188.01   13.09
   1 -14   1  179.67   13.89
  -1 -14  -1  183.88   13.20
  -2  14  -1   11.97   10.84
   2  14   1   16.96   11.74
   2 -14   1    1.38   10.80
  -2 -14  -1   21.42   11.31
  -3  14  -1   24.54   10.42
   3  14   1   34.62    8.43
   3 -14   1   30.04    8.80
   3 -14   1   20.56    9.00
  -3 -14  -1   35.83    9.81
  -4  14  -1  191.67   14.61
   4  14   1  180.85   13.61
   4 -14   1  180.95   13.84
   4 -14   1  153.50   14.47
  -4 -14  -1  191.33   13.61
  -5  14  -1   60.51   12.39
   5  14   1   86.10    9.81
   5 -14   1   62.48   11.47
   5 -14   1   75.84   12.48
  -5 -14  -1   83.31    9.67
  -6  14  -1   76.30    9.37
   6  14   1   82.06    9.70
   6 -14   1   56.55   12.46
   6 -14   1   63.72   11.37
  -6 -14  -1   76.53    9.44
  -7  14  -1    5.46   11.19
   7  14   1   20.04    9.89
   7 -14   1    3.12    7.49
   7 -14   1   14.00    9.68
  -7 -14  -1    7.98   11.29
  -8  14  -1    6.64   12.30
   8  14   1   15.64    8.19
   8 -14   1    5.24    8.23
   8 -14   1    8.10   12.52
  -8 -14  -1   15.42   11.83
  -9  14  -1  320.57   23.27
   9  14   1  329.89   20.45
   9 -14   1  321.14   20.26
  -9 -14  -1  350.72   21.03
  -9  14  -1  386.46   23.29
  10  14   1  166.79   14.53
  10 -14   1  141.03   14.25
 -10 -14  -1  144.40   14.02
 -10  14  -1  135.65   12.70
  11  14   1   20.38   11.18
  11 -14   1  -16.83   11.02
 -11 -14  -1   -6.19   12.14
 -11  14  -1    6.84   14.39
  12  14   1    8.92   12.83
  12 -14   1    5.41   10.69
 -12 -14  -1   16.32   10.53
  11  15  -1  148.89   16.20
 -11 -15   1  167.97   17.87
 -11  15   1  157.55   14.75
  10  15  -1  127.14   11.65
  10 -15  -1  102.65   18.56
 -10 -15   1  137.88   18.07
  -9  15   1   46.29   10.95
   9  15  -1   51.07   11.15
   9 -15  -1   27.86   12.85
  -9 -15   1   63.56   13.55
  -8  15   1   15.19   10.11
   8  15  -1   23.94   13.85
   8 -15  -1   24.22   14.88
  -8 -15   1   17.66   10.52
  -7  15   1  111.36   12.90
   7  15  -1  133.99   15.17
   7 -15  -1  137.00   12.96
  -7 -15   1  142.81   18.98
  -6  15   1   81.12   10.41
   6  15  -1   88.86   11.08
   6 -15  -1   61.57   11.13
  -6 -15   1   71.27   15.21
  -5  15   1   35.71   10.32
   5  15  -1   51.88    8.50
   5 -15  -1   19.50   11.26
  -5 -15   1   36.33   14.40
  -4  15   1  119.42    9.43
   4  15  -1  119.57   11.73
   4 -15  -1  148.02   14.36
  -4 -15   1  134.00   11.66
   3  15  -1   -0.61    6.76
  -3  15   1   -1.54    7.01
   3 -15  -1    1.83    8.11
  -3 -15   1    1.05   10.54
   2  15  -1    1.68    8.33
  -2  15   1   -4.33   10.77
   2 -15  -1   -8.25    9.55
  -2 -15   1   -7.04    8.13
   1  15  -1  125.20    9.66
  -1  15   1  137.85   12.54
   1 -15  -1  114.58   13.84
  -1 -15   1  133.09   12.18
   0  15  -1  152.31   11.88
   0  15   1  157.44   13.48
   0 -15   1  156.86   12.70
   0 -15  -1  193.30   16.20
  -1  15  -1   30.35    9.81
   1  15   1   24.14    8.75
   1 -15   1   13.67    8.32
  -1 -15  -1   26.38   10.74
  -2  15  -1    9.44   11.64
   2  15   1   16.18   10.26
   2 -15   1    5.98    8.33
  -2 -15  -1    4.54    8.90
  -3  15  -1   13.28   10.16
   3  15   1   13.11    7.28
   3 -15   1   10.58    8.67
  -3 -15  -1   25.29   11.03
  -4  15  -1   47.83    9.72
   4  15   1   37.97   10.41
   4 -15   1    5.97    9.16
  -4 -15  -1   23.78   13.32
  -5  15  -1  164.49   13.31
   5  15   1  180.50   12.35
   5 -15   1  133.52   14.87
  -5 -15  -1  201.42   15.93
  -6  15  -1   36.34   14.70
   6  15   1   38.11    8.88
   6 -15   1   23.79   11.21
  -6 -15  -1   47.57   10.55
  -7  15  -1   10.26    8.87
   7  15   1   29.76   10.24
   7 -15   1    6.64   11.57
  -7 -15  -1   25.85   16.04
  -8  15  -1  186.56   16.11
   8  15   1  212.83   15.82
   8 -15   1  182.42   19.04
  -8 -15  -1  211.77   17.65
   9  15   1   21.23   12.37
  -9 -15  -1   37.13   11.54
  -9  15  -1   38.81   13.64
  10  15   1  113.22   11.26
 -10 -15  -1  143.63   16.62
   9  16  -1   58.33   13.84
   9 -16  -1   45.45   15.62
  -9 -16   1   67.35   12.91
  -8  16   1   23.92   12.83
   8  16  -1   21.97    9.32
   8 -16  -1   40.10   13.67
  -8 -16   1   21.04   13.20
  -7  16   1   11.80   12.74
   7  16  -1   -8.21    9.05
   7 -16  -1   -1.02   14.31
  -7 -16   1    7.42   11.40
  -6  16   1    4.76   11.67
   6  16  -1    6.93   10.49
   6 -16  -1    8.92   10.47
  -6 -16   1    4.81   13.57
  -5  16   1   21.45   12.35
   5  16  -1   46.83   10.82
   5 -16  -1   55.34   13.17
  -5 -16   1   26.63   13.16
  -4  16   1  -14.76   13.14
   4  16  -1   -2.37    8.48
   4 -16  -1    5.24    9.79
  -4 -16   1   -8.65   12.37
   3  16  -1   17.51   10.89
  -3  16   1   17.52    8.71
   3 -16  -1   10.16   10.48
  -3 -16   1    5.06    9.06
   2  16  -1   -2.44   10.79
  -2  16   1   13.43   11.48
   2 -16  -1   -6.09   12.05
  -2 -16   1   -8.17   11.03
   1  16  -1   -3.95    8.65
  -1  16   1   -0.31    8.63
   1 -16  -1  -19.89   10.64
  -1 -16   1   -3.23    8.21
   0  16  -1   99.79   11.86
   0  16   1  124.68   12.44
   0 -16   1   99.53   13.10
   0 -16  -1  111.86   14.12
  -1  16  -1   18.41   10.80
   1  16   1    5.59    8.81
   1 -16   1   18.73   12.98
  -1 -16  -1   32.56   12.91
  -2  16  -1   -5.07    9.84
   2  16   1   -0.96   12.07
   2 -16   1    1.57   13.17
  -2 -16  -1    7.66   13.95
  -3  16  -1    7.40   11.42
   3  16   1   15.71    7.62
   3 -16   1   11.27   12.58
  -3 -16  -1    6.66   14.06
  -4  16  -1   31.62   14.76
   4  16   1   16.72   11.29
   4 -16   1   14.91   10.33
  -4 -16  -1   14.03   15.46
  -5  16  -1    1.35   11.83
   5  16   1   12.03    8.15
   5 -16   1   -0.54    9.13
  -5 -16  -1   -6.70   15.91
  -6  16  -1   -0.76   13.07
   6  16   1   19.96   10.47
   6 -16   1   14.58   13.28
  -6 -16  -1    7.06   12.06
  -7  16  -1   15.23   11.31
   7  16   1   11.87    9.43
   7 -16   1   13.21   13.34
  -7 -16  -1   19.88   16.64
  -8  16  -1    6.50   15.88
   8  16   1    0.92   10.49
  -8 -16  -1  -24.79   17.27
  -5  17   1   -4.58   11.68
   5  17  -1   -0.08   10.03
   5 -17  -1   -2.37   14.48
  -5 -17   1   15.64   15.16
  -4  17   1   24.80   10.46
   4  17  -1   32.94   12.29
   4 -17  -1   23.83   12.40
  -4 -17   1    8.37   14.41
   3  17  -1    4.68    8.78
  -3  17   1    9.79   11.86
   3 -17  -1   13.14   15.42
  -3 -17   1   17.50   15.18
   2  17  -1   -0.41    9.38
  -2  17   1    2.07   11.00
   2 -17  -1   16.04   12.92
  -2 -17   1    3.76   13.74
   1  17  -1   11.23   10.41
  -1  17   1    3.63   11.78
   1 -17  -1    9.83   12.24
  -1 -17   1    8.07   10.68
   0  17  -1   49.47   13.15
   0  17   1   28.44    9.44
   0 -17   1   27.73   13.47
   0 -17  -1   33.05   15.26
  -1  17  -1   20.80   12.63
   1  17   1   21.04    9.37
   1 -17   1   -1.71   12.18
  -1 -17  -1   10.60   16.45
  -2  17  -1  -11.96   11.35
   2  17   1  -16.51   12.25
   2 -17   1   -0.78   10.42
  -2 -17  -1   11.72   16.92
  -3  17  -1    6.70    9.30
   3  17   1    5.08    7.55
   3 -17   1    9.67   13.94
  -3 -17  -1   16.45   19.56
  -4  17  -1   -1.91   14.59
   4  17   1   -5.57   12.77
   4 -17   1    5.37   10.96
  -4 -17  -1    3.27   13.98
  -5  17  -1   70.77   16.59
   5  17   1   53.58   11.11
  -5 -17  -1   36.83   16.28
  21   0  -2    5.96   18.95
 -21   0   2   -4.45   11.47
  20   0  -2   19.49   14.44
 -20   0   2   38.61    9.30
  19   0  -2   68.26   14.05
 -19   0   2   80.22   10.77
  18   0  -2   20.84   13.75
 -18   0   2   11.07    8.00
  17   0  -2  419.81   21.93
 -17   0   2  385.15   18.57
  16   0  -2   -1.49   11.33
 -16   0   2   -6.94    9.39
  15   0  -2  154.40   12.49
 -15   0   2  130.04    9.11
  14   0  -2  765.50   21.44
 -14   0   2  843.22   22.45
  13   0  -2   -2.49    7.68
 -13   0   2    8.10    6.95
  12   0  -2  129.14    8.64
 -12   0   2  128.73    8.63
  11   0  -2  337.46   14.48
 -11   0   2  319.61   11.02
  10   0  -2   70.71    8.64
 -10   0   2   62.74    5.80
   9   0  -2  378.70   14.98
  -9   0   2  370.00   11.91
   8   0  -2 5358.35  120.17
  -8   0   2 5506.93  103.53
   7   0  -2 1210.91   29.65
  -7   0   2 1273.79   29.41
   6   0  -2  416.44   15.02
   6   0  -2  509.35   17.08
  -6   0   2  508.03   15.93
   4   0  -2   18.70    8.25
   4   0  -2   20.69    6.97
  -4   0   2   18.82    5.32
   3   0  -2   -1.18    8.86
   3   0  -2  -10.47    6.76
  -3   0   2    1.84    4.32
   2   0  -2   59.03   11.33
   2   0  -2   59.87    6.92
   2   0  -2   67.47   10.37
   1   0  -2 1602.25   35.94
   1   0  -2 1533.32   34.65
   1   0  -2 1470.96   34.84
  -1   0   2 1379.56   35.76
   0   0  -2 1847.79   41.11
   0   0   2 1748.36   35.62
   0   0  -2 1683.46   38.01
  -1   0  -2  988.40   26.13
   1   0   2 1118.89   26.34
  -1   0  -2 1020.59   25.69
  -2   0  -2  112.25    8.36
   2   0   2  106.29    7.21
  -2   0  -2  113.93    7.57
  -3   0  -2  911.42   24.50
   3   0   2  908.80   23.28
  -3   0  -2  945.44   23.27
  -5   0  -2   41.67    6.09
   5   0   2   40.39    5.06
  -5   0  -2   34.84    6.13
  -6   0  -2    4.80    4.48
   6   0   2    5.50    5.53
  -6   0  -2    8.89    4.72
  -7   0  -2  236.17   10.31
   7   0   2  221.96   10.02
  -7   0  -2  233.06    9.95
  -8   0  -2  499.13   15.07
   8   0   2  510.80   15.59
  -8   0  -2  483.57   13.79
  -9   0  -2  898.58   20.75
   9   0   2  936.82   22.91
  -9   0  -2  961.21   20.49
  10   0   2 3858.87  103.06
  10   0   2 4006.43   98.63
 -10   0  -2 3809.48   95.17
  11   0   2    1.14    3.53
  11   0   2   -6.29    7.17
 -11   0  -2   -0.38    7.14
  12   0   2   -1.08    3.70
  12   0   2    6.15    9.82
 -12   0  -2   -1.21    7.06
  13   0   2 1366.34   48.38
 -13   0  -2 1381.75   24.56
  14   0   2   43.86   10.40
 -14   0  -2   36.55    8.18
  15   0   2   32.67   10.97
 -15   0  -2   38.72    9.54
  16   0   2    2.49   11.83
 -16   0  -2   -0.41    8.47
  17   0   2   14.92   11.65
 -17   0  -2   15.25    9.84
  18   0   2   51.41   13.11
 -18   0  -2   62.86   10.83
  19   0   2  257.57   16.38
 -19   0  -2  257.78   12.53
  21   1  -2   -0.96   13.82
  21  -1  -2    2.08   12.79
 -21  -1   2   -9.64   11.60
 -21   1   2    2.99    9.53
  20   1  -2   24.93   13.95
  20  -1  -2   19.76   12.46
 -20  -1   2   16.77    8.94
 -20   1   2   26.38    8.62
  19   1  -2   37.35   14.25
  19  -1  -2   43.93   12.04
 -19  -1   2   39.71   10.00
 -19   1   2   21.76    9.09
  18   1  -2   -6.78    9.16
  18  -1  -2  -22.38   10.69
 -18  -1   2   -4.53    8.15
 -18   1   2    1.88   10.15
  17   1  -2    6.88    8.06
  17  -1  -2   17.25   10.08
 -17  -1   2   14.20    7.30
 -17   1   2   16.27    9.84
  16   1  -2    3.05    9.39
  16  -1  -2   -0.15   10.00
 -16  -1   2   -8.64    8.84
 -16   1   2    4.96    6.29
  15   1  -2    2.35    8.93
  15  -1  -2   -5.56    8.06
 -15  -1   2    0.68    5.36
 -15   1   2   -1.80    6.31
  14   1  -2   -0.47    6.77
  14  -1  -2   17.59   10.08
 -14  -1   2    4.68    8.28
 -14   1   2   10.17    7.13
  13   1  -2   59.95   10.95
  13  -1  -2   69.28   10.05
 -13  -1   2   76.23    8.53
 -13   1   2   55.59    7.36
  12   1  -2    8.36    7.84
  12  -1  -2   -2.22    5.20
 -12  -1   2    5.05    5.25
 -12   1   2    6.68    7.92
  11   1  -2    1.95    7.73
  11  -1  -2   -0.10    7.18
 -11  -1   2    8.78    7.31
 -11   1   2    5.79    6.43
  10   1  -2   24.19    4.61
  10   1  -2   29.67    7.09
  10  -1  -2   29.91    6.00
 -10  -1   2   24.32    6.03
 -10   1   2   21.76    4.97
   9   1  -2   55.21    5.50
   9   1  -2   57.84    7.81
   9  -1  -2   54.86    7.83
  -9  -1   2   45.02    6.25
  -9   1   2   50.16    6.31
   8   1  -2  339.51   12.22
   8   1  -2  369.32   14.27
   8  -1  -2  396.18   16.03
  -8  -1   2  392.88   14.49
  -8   1   2  378.99   14.25
   7   1  -2    2.76    3.77
   7   1  -2    1.09    6.16
   7  -1  -2   -3.03    6.16
  -7  -1   2   -2.10    4.81
  -7   1   2   -1.33    3.93
   6   1  -2   17.50    4.19
  -6   1   2    9.84    3.36
   6   1  -2   21.14    6.17
   6  -1  -2   18.99    6.23
  -6  -1   2   24.92    6.10
  -6   1   2   16.21    5.34
   5  -1  -2   -0.28    4.65
   5   1  -2    4.82    3.76
   5   1  -2    5.56    6.40
   5  -1  -2    9.68    7.06
  -5  -1   2    4.95    4.83
  -5   1   2    3.34    4.60
   4  -1  -2    8.14    7.23
   4   1  -2    6.50    4.61
   4   1  -2    1.20    6.64
   4  -1  -2    7.96    6.08
  -4  -1   2    6.30    4.85
  -4   1   2    5.01    5.17
   3  -1  -2    2.09    8.67
   3   1  -2    0.56    5.02
   3   1  -2    3.31    6.05
   3  -1  -2    2.36    5.84
   3  -1  -2    0.51    5.36
  -3  -1   2    0.09    4.73
   2  -1  -2    5.49    5.18
   2   1  -2    7.28    4.68
   2   1  -2    9.14    5.61
   2  -1  -2    6.63    5.44
   2  -1  -2   10.32    5.77
  -2  -1   2    4.16    5.86
   2   1  -2    3.06    5.38
   1  -1  -2   16.04    5.17
   1   1  -2   15.45    6.18
   1  -1  -2   10.94    8.55
  -1  -1   2   22.93    4.99
   1  -1  -2   25.39    5.60
  -1  -1   2   17.93    3.76
   0  -1  -2    6.62    5.40
   0   1  -2    5.38    5.76
   0  -1   2    3.42    3.93
   0   1   2    4.68    5.80
   0  -1  -2    2.32    4.55
   0  -1  -2    5.99    4.34
   0  -1   2    3.11    2.36
  -1  -1  -2    1.57    5.21
  -1   1  -2    0.92    5.37
   1   1   2    6.51    7.58
   1  -1   2    4.03    4.50
  -1  -1  -2    1.94    4.99
  -1   1  -2    5.04    6.00
   1  -1   2    0.74    5.18
  -2  -1  -2   41.14    6.74
  -2   1  -2   38.82    7.81
   2   1   2   37.31    5.47
   2  -1   2   43.92    5.84
  -2  -1  -2   41.77    5.83
  -2   1  -2   42.93    5.00
  -3  -1  -2    7.34    5.80
  -3   1  -2    0.96    6.21
   3   1   2    6.80    4.97
   3  -1   2    1.73    5.63
  -3  -1  -2    0.88    5.15
  -3   1  -2    4.60    4.58
  -4  -1  -2   25.92    6.64
  -4   1  -2   26.50    6.77
   4   1   2   30.44    6.09
   4  -1   2   27.91    5.51
  -4  -1  -2   25.72    6.00
  -4   1  -2   31.36    5.72
  -5  -1  -2   35.91    5.79
  -5   1  -2   30.32    5.95
   5   1   2   27.55    5.64
   5  -1   2   32.68    5.31
  -5  -1  -2   28.71    5.44
  -5   1  -2   38.38    5.18
  -6  -1  -2   95.12    6.90
  -6   1  -2  102.11    7.66
   6   1   2   94.20    7.18
   6  -1   2   97.40    7.99
  -6  -1  -2   91.20    6.83
  -6   1  -2  105.26    7.89
  -7   1  -2  312.57   11.61
   7   1   2  280.78    9.57
   7   1   2  298.25   11.65
   7  -1   2  306.97   11.42
  -7  -1  -2  305.72   10.56
  -7   1  -2  325.97   11.10
  -8   1  -2   25.23    5.38
   8   1   2   23.47    4.25
   8   1   2   30.13    6.42
   8  -1   2   28.49    6.21
  -8  -1  -2   28.03    6.12
  -8   1  -2   22.17    6.31
  -9   1  -2    1.61    4.56
   9   1   2   -2.30    3.38
   9   1   2   -1.55    6.13
   9  -1   2   -3.67    5.77
  -9  -1  -2   -2.30    5.30
  -9   1  -2   -1.31    6.05
 -10   1  -2    2.78    5.08
  10   1   2   -1.08    4.67
  10   1   2    5.30    7.20
  10  -1   2    4.37    5.74
 -10  -1  -2    3.52    6.14
 -10   1  -2    4.45    6.49
  11   1   2    0.86    4.09
  11   1   2    2.57    6.96
  11  -1   2    6.05    8.22
 -11  -1  -2    8.10    6.94
 -11   1  -2    4.97    4.99
  12   1   2    4.84    4.31
  12   1   2    3.21    7.35
  12  -1   2    8.17    5.86
 -12  -1  -2    6.53    5.24
 -12   1  -2   -0.02    7.13
  13   1   2   26.38    8.54
  13  -1   2   24.66    9.18
 -13  -1  -2   22.11    7.87
 -13   1  -2   11.74    8.81
  14   1   2   28.06   10.77
  14  -1   2    9.63    9.12
 -14  -1  -2   14.46    6.06
 -14   1  -2   14.53    8.58
  15   1   2    4.95    9.02
  15  -1   2   15.95   11.44
 -15  -1  -2   -0.71    6.43
 -15   1  -2    5.97    7.70
  16   1   2   12.14    9.22
  16  -1   2   -5.85   13.07
 -16  -1  -2   -0.19    9.25
 -16   1  -2    5.37    7.59
  17   1   2   26.33    9.16
  17  -1   2   40.80   13.46
 -17  -1  -2   23.42   11.67
 -17   1  -2   19.04    9.89
  18   1   2   -4.49   14.51
  18  -1   2   -1.72   11.72
 -18  -1  -2   14.01   12.09
 -18   1  -2   -5.95    7.19
  19   1   2   10.26   14.21
  19  -1   2    6.37   10.98
 -19  -1  -2    2.01   12.61
 -19   1  -2   -3.38    8.17
  21   2  -2   -2.87   12.51
  21  -2  -2    7.15   11.66
 -21  -2   2  -15.38   10.24
 -21   2   2   -1.39    8.57
  20   2  -2    6.23   11.00
  20  -2  -2   -7.54   10.82
 -20  -2   2   -5.21    9.36
 -20   2   2  -10.29    7.67
  19   2  -2  140.39   15.36
  19  -2  -2  147.89   15.71
 -19  -2   2  121.91    9.87
 -19   2   2  133.45   10.70
  18   2  -2   -1.21   12.31
  18  -2  -2    4.32   12.70
 -18  -2   2   -5.21    6.79
 -18   2   2    2.34    9.19
  17   2  -2  273.76   16.01
  17  -2  -2  306.44   17.56
 -17  -2   2  259.14   15.57
 -17   2   2  290.61   15.64
  16   2  -2   11.02    9.51
  16  -2  -2   -0.64    8.64
 -16  -2   2    6.62    8.90
 -16   2   2    3.01    7.72
  15   2  -2   58.95   11.75
  15  -2  -2   61.11    8.44
 -15  -2   2   60.82    9.31
 -15   2   2   51.33    7.32
  14   2  -2  171.23   12.15
  14  -2  -2  193.47   10.87
 -14  -2   2  167.75   10.33
 -14   2   2  154.37    9.33
  13   2  -2   63.23    9.63
  13  -2  -2   84.42    8.35
 -13  -2   2   68.53    7.76
 -13   2   2   73.01    7.96
  12   2  -2   39.14    7.85
  12  -2  -2   52.75    8.99
 -12  -2   2   47.08    7.70
 -12   2   2   39.24    6.29
  11   2  -2   19.51    4.72
  11   2  -2   21.77    7.89
  11  -2  -2   19.11    8.27
 -11  -2   2   27.84    7.13
 -11   2   2   30.34    6.89
  10   2  -2   38.71    5.48
  10   2  -2   38.28    7.31
  10  -2  -2   40.98    7.44
 -10  -2   2   38.12    5.24
 -10   2   2   31.22    6.28
   9   2  -2  293.84   10.95
   9   2  -2  318.98   12.96
   9  -2  -2  293.66   11.79
  -9  -2   2  303.76   11.10
  -9   2   2  309.20   11.10
   8   2  -2 1216.96   32.28
   8   2  -2 1306.05   32.90
   8  -2  -2 1339.33   34.27
  -8  -2   2 1238.24   32.22
  -8   2   2 1208.47   30.57
   7   2  -2   47.76    5.48
   7   2  -2   49.82    7.48
   7  -2  -2   46.57    6.80
  -7  -2   2   49.50    6.17
  -7   2   2   47.14    6.75
   6   2  -2   68.47    5.92
  -6   2   2   51.42    6.19
   6   2  -2   63.79    6.72
   6  -2  -2   60.91    7.19
  -6  -2   2   55.96    5.66
  -6   2   2   66.28    5.83
   5   2  -2 3249.44   67.18
   5  -2  -2 3298.87   40.62
  -5  -2   2 3160.17   63.71
  -5   2   2 3302.69   35.81
   4   2  -2   62.31    6.32
  -4   2   2   56.80    5.44
   4   2  -2   63.36    8.50
   4  -2  -2   62.48    7.54
   4  -2  -2   65.85    7.95
  -4  -2   2   66.58    6.40
   3   2  -2   90.44    7.33
  -3   2   2   87.27    6.03
   3   2  -2   86.59    8.06
   3  -2  -2   91.37    8.38
   3  -2  -2   89.09    7.99
  -3  -2   2   95.08    6.81
   2   2  -2 3093.95   63.32
  -2   2   2 2967.56   59.54
   2   2  -2 3276.66   40.58
   2  -2  -2 3320.22   37.26
   2  -2  -2 3211.47   66.22
  -2  -2   2 3151.13   68.16
   1   2  -2  268.53   10.74
  -1   2   2  248.47    9.07
   1  -2  -2  268.26   12.68
  -1   2   2  227.22   11.61
  -1  -2   2  262.09    9.27
   1  -2  -2  259.55   10.41
  -1  -2   2  226.21    9.72
   1   2  -2  203.99   10.31
   0   2  -2  433.89   14.98
   0   2   2  425.64   13.61
   0   2   2  379.00   14.61
   0  -2   2  432.43   13.49
   0   2   2  428.15   13.57
   0   2  -2  390.70   14.45
   0  -2  -2  436.61   14.39
  -2   2  -2  505.27   16.87
   2   2   2  536.40   15.89
   2   2   2  473.95   19.09
   2  -2   2  567.76   16.40
  -2  -2  -2  532.50   16.29
  -2   2  -2  535.55   15.52
  -3   2  -2  585.81   18.32
   3   2   2  589.68   16.76
   3   2   2  582.05   16.98
   3  -2   2  564.90   16.34
  -3  -2  -2  604.36   17.81
  -3   2  -2  596.42   17.49
  -4   2  -2  231.37   10.89
   4   2   2  244.78    8.79
   4   2   2  238.56   10.20
   4  -2   2  254.29    9.54
  -4  -2  -2  237.31    9.30
  -4   2  -2  264.79   10.05
  -5   2  -2   40.27    6.22
   5   2   2   34.38    5.13
   5   2   2   32.39    5.37
   5  -2   2   37.70    5.91
  -5  -2  -2   37.12    5.19
  -5   2  -2   38.62    4.81
  -6   2  -2    8.06    5.14
   6   2   2    6.85    4.47
   6   2   2    0.57    5.01
   6  -2   2    7.89    6.16
  -6  -2  -2    5.08    6.10
  -6   2  -2   10.99    5.28
  -7   2  -2   11.11    5.64
   7   2   2    5.18    3.83
   7   2   2    3.50    6.16
   7  -2   2    2.74    6.13
  -7  -2  -2    5.12    5.36
  -7   2  -2   -1.17    5.06
  -8   2  -2   43.85    6.26
   8   2   2   35.36    5.22
   8   2   2   42.04    6.37
   8  -2   2   43.39    7.26
  -8  -2  -2   51.26    6.91
  -8   2  -2   48.73    6.29
  -9   2  -2  150.58    9.10
   9   2   2  144.37    7.42
   9   2   2  151.77    9.27
   9  -2   2  152.06   10.32
  -9  -2  -2  160.29    9.42
  -9   2  -2  144.35    8.30
 -10   2  -2 1135.76   33.17
  10   2   2 1101.75   31.24
  10   2   2 1167.25   33.46
  10  -2   2 1102.85   31.48
 -10  -2  -2 1157.66   31.43
 -10   2  -2 1174.17   32.28
 -11   2  -2   44.89    6.65
  11   2   2   47.88    6.01
  11   2   2   41.26    9.97
  11  -2   2   44.19    7.74
 -11  -2  -2   42.96    7.47
 -11   2  -2   43.35    6.88
  12   2   2   36.14    5.85
  12   2   2   32.74    9.33
  12  -2   2   36.97    9.72
 -12  -2  -2   33.68    7.48
 -12   2  -2   28.64    6.25
  13   2   2  771.89   29.64
  13   2   2  834.97   30.96
  13  -2   2  864.53   31.99
 -13  -2  -2  832.55   30.02
 -13   2  -2  848.11   30.46
  14   2   2   32.25   11.91
  14  -2   2   18.99   10.19
 -14  -2  -2   13.37    7.70
 -14   2  -2   22.76    6.40
  15   2   2   10.74   12.67
  15  -2   2   29.91   10.17
 -15  -2  -2   14.06    9.69
 -15   2  -2   12.93    8.96
  16   2   2   45.42    9.30
  16  -2   2   30.97   12.94
 -16  -2  -2   55.50    8.97
 -16   2  -2   60.29    8.46
  17   2   2   13.62   10.60
  17  -2   2    0.90   12.90
 -17  -2  -2    0.37    9.33
 -17   2  -2    3.35   10.75
  18   2   2   -6.82   11.36
  18  -2   2    2.79   12.00
 -18  -2  -2   -6.62   11.85
 -18   2  -2    2.70    7.99
  19   2   2  184.54   15.43
  19  -2   2  159.57   20.49
 -19  -2  -2  207.49   14.24
 -19   2  -2  171.16   13.73
  21   3  -2    6.25   14.68
  21  -3  -2   -3.47   14.89
 -21  -3   2   -0.54   11.89
 -21   3   2   13.93   15.52
  20   3  -2   -7.66   12.24
  20  -3  -2   -4.53   11.27
 -20  -3   2  -15.58   11.05
 -20   3   2   -9.93   11.31
  19   3  -2   -4.95    9.19
  19  -3  -2    1.56    9.44
 -19  -3   2  -11.10   10.44
 -19   3   2    4.56   10.87
  18   3  -2   -1.66    9.87
  18  -3  -2   -7.56   10.81
 -18  -3   2   15.14   10.84
 -18   3   2    9.05   10.01
  17   3  -2   86.60   10.35
  17  -3  -2   96.40   13.87
 -17  -3   2   88.31   11.97
 -17   3   2   90.16    9.92
  16   3  -2   14.55    8.98
  16  -3  -2   18.11   10.21
 -16  -3   2   10.21    8.99
 -16   3   2   24.48    7.71
  15   3  -2   32.00    8.85
  15  -3  -2   19.60    8.18
 -15  -3   2   19.24    6.31
 -15   3   2   16.73   10.17
  14   3  -2   20.20    6.35
  14  -3  -2   16.88    7.17
 -14  -3   2   18.79    5.70
 -14   3   2   31.96    7.16
  13   3  -2   -4.79    6.87
  13  -3  -2   -1.85    5.75
 -13  -3   2   -2.15    6.65
 -13   3   2    1.84    7.78
  12   3  -2   26.81    5.61
  12   3  -2   26.05    8.14
  12  -3  -2   33.35    7.73
 -12  -3   2   28.94    5.59
 -12   3   2   36.82    8.80
  11   3  -2  126.72    8.77
  11   3  -2  137.16   10.07
  11  -3  -2  129.53    8.83
 -11  -3   2  140.19    9.41
 -11   3   2  119.27    8.64
  10   3  -2   -1.48    4.41
  10   3  -2    3.49    6.92
  10  -3  -2    1.86    5.19
 -10  -3   2    4.29    6.30
 -10   3   2    2.93    4.96
   9   3  -2  117.59    7.97
   9   3  -2  138.60    9.79
   9  -3  -2  128.00    9.17
  -9  -3   2  134.13    8.80
  -9   3   2  122.60    7.67
  -8   3   2   28.31    6.14
   8   3  -2   48.19    6.50
   8   3  -2   58.74    7.61
   8  -3  -2   60.59    8.06
  -8  -3   2   51.02    6.24
  -8   3   2   43.51    6.55
   7   3  -2   35.92    5.66
  -7   3   2   32.28    4.80
   7   3  -2   40.40    7.15
   7  -3  -2   36.85    6.48
  -7  -3   2   45.20    6.15
  -7   3   2   48.37    6.16
   6   3  -2   36.99    5.21
  -6   3   2   31.43    4.43
   6   3  -2   36.37    7.05
   6  -3  -2   31.32    5.40
  -6  -3   2   31.34    4.87
  -6   3   2   35.40    5.54
   5   3  -2    5.15    4.69
  -5   3   2    1.55    3.39
   5   3  -2   -4.62    5.85
   5  -3  -2    5.08    5.32
   5  -3  -2   -0.66    7.06
  -5  -3   2    3.91    5.45
   4   3  -2  104.88    7.67
  -4   3   2   95.70    6.27
   4   3  -2   94.73    7.99
   4  -3  -2   94.42    7.32
   4  -3  -2  108.82    8.77
  -4  -3   2  109.50    7.40
   3   3  -2   46.54    6.12
  -3   3   2   43.93    4.99
   3   3  -2   54.13    7.62
   3  -3  -2   45.14    5.95
   3  -3  -2   47.54    7.10
  -3  -3   2   45.08    5.49
   2   3  -2    2.67    5.44
  -2   3   2   -1.49    4.41
   2  -3  -2   -0.09    4.62
  -2  -3   2    0.55    4.65
   2  -3  -2   -0.40    5.26
  -2  -3   2    2.17    4.12
   1   3  -2    7.00    5.44
  -1   3   2    5.15    4.45
   1  -3  -2   13.46    7.03
  -1  -3   2    6.13    4.84
   1  -3  -2    2.85    5.25
  -1  -3   2    6.61    7.26
   0   3  -2   32.93    6.17
   0   3   2   34.57    6.00
   0   3   2    9.29    3.89
   0  -3   2   37.07    5.84
   0   3   2   24.20    3.53
   0  -3   2   27.69    8.68
   0  -3  -2   34.38    6.21
  -1   3  -2   41.91    7.16
   1   3   2   42.11    5.90
   1   3   2   20.46    3.92
   1  -3   2   43.78    6.40
  -1  -3  -2   25.60    3.48
   1  -3   2   27.57    5.60
  -1  -3  -2   35.90    6.44
  -2   3  -2   50.60    5.93
   2   3   2   56.00    6.01
   2   3   2   38.90    6.31
   2  -3   2   51.56    5.98
  -2  -3  -2   43.77    5.66
  -2   3  -2   49.97    5.57
  -3   3  -2   98.44    8.39
   3   3   2   89.99    6.80
   3   3   2   81.24    6.32
   3  -3   2  102.39    7.06
  -3  -3  -2   94.84    7.13
  -3   3  -2   93.02    6.18
  -4   3  -2  194.47   10.04
   4   3   2  234.12    9.09
   4   3   2  222.92    9.36
   4  -3   2  209.58    8.85
  -4  -3  -2  216.43    9.23
  -4   3  -2  220.30    8.78
  -5   3  -2   21.96    5.13
   5   3   2   22.23    4.45
   5   3   2   18.43    4.05
   5  -3   2   23.54    5.95
  -5  -3  -2   25.96    6.27
  -5   3  -2   22.71    4.44
  -6   3  -2   36.58    6.67
   6   3   2   32.95    6.14
   6   3   2   31.87    6.06
   6  -3   2   34.83    6.62
  -6  -3  -2   29.13    5.40
  -6   3  -2   33.59    6.23
  -7   3  -2  169.95    9.71
   7   3   2  174.86    8.36
   7   3   2  156.44    9.00
   7  -3   2  152.57    8.97
  -7  -3  -2  155.83    8.08
  -7   3  -2  175.60    9.07
  -8   3  -2   58.70    6.82
   8   3   2   55.46    5.34
   8   3   2   58.93    6.52
   8  -3   2   48.40    6.48
  -8  -3  -2   55.61    6.54
  -8   3  -2   58.56    6.66
  -9   3  -2    0.08    5.21
   9   3   2    3.23    4.79
   9   3   2   -0.76    5.85
   9  -3   2   -3.87    7.09
  -9  -3  -2    3.43    5.10
  -9   3  -2    6.38    5.66
 -10   3  -2   12.35    5.52
  10   3   2   13.44    5.48
  10   3   2   11.79    7.08
  10  -3   2   23.00    7.31
 -10  -3  -2    4.94    6.36
 -10   3  -2    8.04    5.07
 -11   3  -2    8.77    6.00
  11   3   2    9.22    5.04
  11   3   2    3.73    6.21
  11  -3   2    3.60    6.92
 -11  -3  -2    5.72    5.41
 -11   3  -2    7.83    4.69
  12   3   2    5.74    4.86
  12   3   2    5.15    7.08
  12  -3   2    6.95    8.84
 -12  -3  -2    9.31    8.78
 -12   3  -2    6.11    5.53
  13   3   2    6.15    5.17
  13   3   2   11.64    7.30
  13  -3   2   10.22    7.71
 -13  -3  -2   19.51    8.25
 -13   3  -2   13.02    8.13
  14   3   2   17.87    9.01
  14  -3   2    8.53   10.01
 -14  -3  -2    4.15    6.40
 -14   3  -2    5.17    8.47
  15   3   2   27.57    9.91
  15  -3   2   24.25   10.44
 -15  -3  -2   21.04    6.48
 -15   3  -2   33.75    7.92
  16   3   2   10.04   10.21
  16  -3   2   20.35    9.48
 -16  -3  -2   13.12   11.62
 -16   3  -2   11.32    7.33
  17   3   2   34.67   12.72
  17  -3   2   19.64    9.42
 -17  -3  -2   17.49    8.01
 -17   3  -2   -3.88   11.33
  18   3   2    0.75   12.45
  18  -3   2   -4.17   10.07
 -18  -3  -2    3.44    7.52
 -18   3  -2   11.29   12.78
  19   3   2    0.51   11.29
  19  -3   2   13.64   10.92
 -19  -3  -2   13.40   13.21
 -19   3  -2    6.58    8.19
  20   4  -2    4.07   13.95
  20  -4  -2    6.12   10.57
 -20  -4   2   -2.97    9.07
 -20   4   2    3.55   10.06
  19   4  -2   38.56   12.04
  19  -4  -2   49.02   15.58
 -19  -4   2   38.75    7.92
 -19   4   2   22.82    8.25
  18   4  -2   -6.91   10.88
  18  -4  -2  -11.39   10.39
 -18  -4   2    4.01    6.40
 -18   4   2    1.99   10.16
  17   4  -2  107.31   12.25
  17  -4  -2  125.33   11.85
 -17  -4   2  117.80   11.68
 -17   4   2  122.65   11.19
  16   4  -2   14.45    8.37
  16  -4  -2   12.49   10.75
 -16  -4   2   10.37    8.27
 -16   4   2    4.78    6.43
  15   4  -2   53.33    9.35
  15  -4  -2   66.56   12.98
 -15  -4   2   59.09    9.48
 -15   4   2   52.14    8.96
  14   4  -2  178.67   11.85
  14  -4  -2  175.54   13.29
 -14  -4   2  172.73   10.80
 -14   4   2  174.40   12.13
  13   4  -2    2.85    5.34
  13   4  -2    4.94    9.32
  13  -4  -2    6.74    6.94
 -13  -4   2   -5.62    8.19
 -13   4   2   -1.34    8.30
  12   4  -2    7.70    5.04
  12   4  -2    1.45    6.27
  12  -4  -2   10.83    6.59
 -12  -4   2    3.71    7.63
 -12   4   2   10.59    8.14
  11   4  -2   55.72    7.43
  11   4  -2   59.60    7.73
  11  -4  -2   66.22    8.66
 -11  -4   2   58.13    7.66
 -11   4   2   48.08    7.05
  10   4  -2  111.95    7.98
  10   4  -2  118.83   10.00
  10  -4  -2  106.20    9.66
 -10  -4   2   98.54    7.03
 -10   4   2  109.66    8.59
  -9   4   2   53.57    6.36
   9   4  -2   74.93    6.76
   9   4  -2  111.69    9.70
   9  -4  -2   72.13    9.61
  -9  -4   2   88.55    7.46
  -9   4   2   95.10    8.40
   8   4  -2  884.11   25.55
   8   4  -2  904.79   26.38
   8  -4  -2  928.16   25.32
  -8  -4   2  851.63   23.42
  -8   4   2  869.21   22.67
   7   4  -2  142.66    9.12
  -7   4   2  117.95    7.91
   7   4  -2  145.55    9.44
   7  -4  -2  139.60    8.62
  -7  -4   2  133.47    7.75
  -7   4   2  150.37    8.67
   6   4  -2    2.50    4.71
  -6   4   2    3.26    3.80
   6   4  -2    1.87    4.97
   6  -4  -2    2.12    5.43
   6  -4  -2    4.20    5.63
  -6  -4   2    9.68    5.86
   5   4  -2    9.49    5.00
  -5   4   2    6.06    3.83
   5   4  -2    8.62    5.78
   5  -4  -2    9.70    4.30
   5  -4  -2    7.35    4.89
  -5  -4   2    9.77    4.85
   4   4  -2   52.35    5.46
  -4   4   2   53.31    5.56
   4   4  -2   62.87    7.83
   4  -4  -2   56.03    5.45
   4  -4  -2   47.52    6.13
  -4  -4   2   46.83    5.13
   3   4  -2    2.09    4.76
  -3   4   2    0.84    4.37
   3  -4  -2    2.17    4.27
  -3  -4   2    2.34    4.33
   3  -4  -2    6.08    5.50
  -3  -4   2    0.89    4.84
   2   4  -2  203.51    9.68
  -2   4   2  215.04    9.00
   2  -4  -2  198.51    8.86
  -2  -4   2  202.19    8.74
   2  -4  -2  207.28   11.03
  -2  -4   2  178.55    9.14
   1   4  -2   -2.35    5.89
  -1   4   2    0.12    4.48
   1  -4  -2    4.88    5.87
  -1  -4   2   -0.27    3.92
   1  -4  -2   -4.39    6.17
  -1  -4   2   -0.35    4.67
   0   4  -2    3.22    5.34
   0   4   2    2.77    4.52
   0  -4  -2    0.54    1.51
   0  -4   2   -0.44    4.81
   0   4   2    0.05    0.73
   0  -4   2    1.20    5.07
   0  -4  -2    7.57    6.79
  -1   4  -2  681.55   19.46
   1   4   2  665.16   18.14
   1  -4   2  721.55   19.42
   1  -4   2  702.70   22.96
  -1  -4  -2  710.61   19.91
  -2   4  -2   -0.58    4.65
   2   4   2   -1.34    4.45
   2   4   2    0.49    4.53
   2  -4   2    0.68    4.93
   2  -4   2   -1.90    5.08
  -2  -4  -2   -1.55    5.31
  -3   4  -2   25.41    5.48
   3   4   2   29.36    4.96
   3   4   2   24.48    4.92
   3  -4   2   29.43    5.14
  -3  -4  -2   30.06    6.29
  -3   4  -2   38.17    5.17
  -4   4  -2   44.98    6.31
   4   4   2   51.56    6.09
   4   4   2   46.05    6.25
   4  -4   2   49.53    6.18
  -4  -4  -2   45.37    6.00
  -4   4  -2   45.42    4.96
  -5   4  -2   46.22    6.35
   5   4   2   38.25    5.25
   5   4   2   31.98    5.62
   5  -4   2   34.07    6.21
  -5  -4  -2   30.99    5.65
  -5   4  -2   31.47    6.45
  -6   4  -2   72.84    7.44
   6   4   2   66.63    5.85
   6   4   2   75.87    6.88
   6  -4   2   68.67    6.59
  -6  -4  -2   72.87    6.41
  -6   4  -2   69.00    7.07
  -7   4  -2   96.32    8.31
   7   4   2   94.21    6.46
   7   4   2   90.38    7.29
   7  -4   2   90.21    7.00
  -7  -4  -2   94.30    7.40
  -7   4  -2   98.20    7.22
  -8   4  -2    4.54    5.78
   8   4   2    4.22    4.26
   8   4   2    5.85    5.23
   8  -4   2    4.27    7.23
  -8  -4  -2    7.69    7.17
  -8   4  -2    1.93    5.67
  -9   4  -2    3.37    5.31
   9   4   2    8.53    5.91
   9   4   2   11.06    6.77
   9  -4   2    5.06    5.06
  -9  -4  -2    6.79    6.05
  -9   4  -2   16.42    5.97
 -10   4  -2  810.30   25.99
  10   4   2  836.49   25.74
  10   4   2  818.20   27.20
  10  -4   2  801.06   25.05
 -10  -4  -2  855.29   25.34
 -10   4  -2  813.26   24.59
 -11   4  -2   79.25    7.53
  11   4   2   83.07    7.13
  11   4   2   84.39    9.41
  11  -4   2   82.55    9.59
 -11  -4  -2   91.22    9.15
 -11   4  -2   79.02    8.39
  12   4   2  115.56    8.05
  12   4   2  122.69   10.69
  12  -4   2  127.51   10.33
 -12  -4  -2  116.67    9.37
 -12   4  -2  126.26    8.90
  13   4   2  318.60   18.90
  13   4   2  319.79   20.73
  13  -4   2  336.30   21.11
 -13  -4  -2  382.81   22.85
 -13   4  -2  347.20   21.08
  14   4   2   -0.06   10.72
  14  -4   2   -4.56    7.53
 -14  -4  -2    5.73    9.62
 -14   4  -2   -0.76    9.06
  15   4   2    3.11   10.60
  15  -4   2   27.29   11.36
 -15  -4  -2   24.80    7.93
 -15   4  -2   27.61    8.12
  16   4   2   22.00    7.65
  16  -4   2   31.13   12.64
 -16  -4  -2   28.71    8.64
 -16   4  -2   25.56    7.34
  17   4   2    7.17   10.09
  17  -4   2    2.62   12.66
 -17  -4  -2    1.07   11.13
 -17   4  -2    6.63    9.07
  18   4   2   27.80   15.86
  18  -4   2   25.64   11.58
 -18  -4  -2   21.14    9.44
 -18   4  -2   14.07   12.77
  19   4   2   74.19   12.29
  19  -4   2  102.49   15.67
 -19  -4  -2   95.76   17.56
 -19   4  -2   92.03   13.42
  20   5  -2    0.49   12.27
  20  -5  -2   10.74    9.59
 -20  -5   2    0.31    9.05
 -20   5   2   15.04   11.16
  19   5  -2   12.38   14.31
  19  -5  -2   -6.31   11.51
 -19  -5   2  -11.94    9.31
 -19   5   2   -4.61    9.63
  18   5  -2   22.42    8.71
  18  -5  -2   43.25   10.11
 -18  -5   2   41.48    7.69
 -18   5   2   36.48    8.70
  17   5  -2  234.37   14.49
  17  -5  -2  201.42   18.40
 -17  -5   2  197.11   13.70
 -17   5   2  237.01   16.05
  16   5  -2  111.53   11.78
  16  -5  -2   85.99   12.49
 -16  -5   2  111.40    9.12
 -16   5   2   88.16    8.80
  15   5  -2   23.74    8.74
  15  -5  -2   36.35    8.36
 -15  -5   2   38.85   10.86
 -15   5   2   30.28    9.13
  14   5  -2    7.45    6.57
  14   5  -2   -6.54    9.19
  14  -5  -2    9.25    9.02
 -14  -5   2    8.01    8.27
 -14   5   2    1.96    7.24
  13   5  -2   20.54    6.57
  13   5  -2   27.57    8.41
  13  -5  -2   22.91   10.95
 -13  -5   2   26.51    8.51
 -13   5   2   14.35    7.67
  12   5  -2  222.68   12.25
  12   5  -2  236.97   13.05
  12  -5  -2  219.61   13.47
 -12  -5   2  212.52   10.81
 -12   5   2  188.87    8.98
  11   5  -2   61.20    7.69
  11   5  -2   60.25    9.85
  11  -5  -2   54.87    7.04
 -11  -5   2   63.93    7.43
 -11   5   2   52.42    8.12
  10   5  -2  180.66   10.15
  10   5  -2  184.53   10.97
  10  -5  -2  155.51    8.90
 -10  -5   2  177.94    9.54
 -10   5   2  167.24    9.35
   9   5  -2  486.17   18.19
   9   5  -2  443.94   18.36
   9  -5  -2  437.19   17.45
  -9  -5   2  450.27   16.36
  -9   5   2  412.26   15.30
  -8   5   2  148.59    8.80
   8   5  -2  178.99    9.83
   8   5  -2  164.54    9.65
   8  -5  -2  158.58   10.48
  -8  -5   2  179.65    9.51
  -8   5   2  173.20    9.58
   7   5  -2  170.09    9.24
  -7   5   2  113.52    8.70
   7   5  -2  142.74    9.43
   7  -5  -2  156.97    9.25
   7  -5  -2  142.19    9.00
  -7  -5   2  136.91    7.58
   6   5  -2   36.26    5.82
  -6   5   2   33.92    5.51
   6   5  -2   36.83    7.48
   6  -5  -2   36.99    6.96
   6  -5  -2   42.81    6.74
  -6  -5   2   35.22    6.34
   5   5  -2   44.76    6.02
  -5   5   2   45.85    5.85
   5   5  -2   45.10    6.58
   5  -5  -2   41.79    6.84
   5  -5  -2   38.19    6.90
  -5  -5   2   41.58    5.66
   4   5  -2  171.97    8.68
  -4   5   2  171.02    8.07
   4   5  -2  194.02   10.04
   4  -5  -2  166.46    8.53
   4  -5  -2  178.68   10.86
  -4  -5   2  173.48    8.67
   3   5  -2   59.02    5.92
  -3   5   2   50.32    5.20
   3  -5  -2   58.26    5.74
  -3  -5   2   57.42    5.50
   3  -5  -2   59.91    7.53
  -3  -5   2   59.01    5.82
   2   5  -2  142.76    7.82
  -2   5   2  134.41    7.16
   2  -5  -2  139.87    7.59
  -2  -5   2  135.98    7.60
   2  -5  -2  149.03    9.52
  -2  -5   2  150.68    8.09
   1   5  -2  124.01    8.06
  -1   5   2  128.39    7.68
   1  -5  -2  121.89    8.21
  -1  -5   2  131.60    7.31
   1  -5  -2  131.91    8.65
  -1  -5   2   96.43    7.22
   0   5  -2  147.32    8.46
   0   5   2  147.19    7.35
   0  -5   2  149.67    7.97
   0  -5   2  145.20    9.41
   0  -5  -2  143.34    8.08
  -1   5  -2   21.12    4.99
   1   5   2   26.92    5.65
   1  -5   2   34.75    5.46
   1  -5   2   27.35    6.18
  -1  -5  -2   37.69    6.63
  -2   5  -2  106.20    7.27
   2   5   2  110.82    6.81
   2  -5   2  105.22    7.05
   2  -5   2   88.66    7.31
  -2  -5  -2  100.44    7.96
  -3   5  -2   38.72    6.28
   3   5   2   34.77    6.24
   3   5   2   15.64    7.26
   3  -5   2   28.85    5.58
   3  -5   2   28.11    5.84
  -3  -5  -2   31.48    5.66
  -4   5  -2   18.45    5.18
   4   5   2   23.44    5.75
   4   5   2   21.40    4.75
   4  -5   2   21.11    5.91
  -4  -5  -2   17.58    5.87
  -4   5  -2   16.48    5.72
  -5   5  -2   81.84    7.80
   5   5   2   93.70    6.92
   5   5   2   88.06    7.54
   5  -5   2   81.64    7.01
  -5  -5  -2   79.41    7.18
  -5   5  -2   75.53    6.31
  -6   5  -2    8.98    6.11
   6   5   2   14.53    5.63
   6   5   2   13.62    4.28
   6  -5   2    6.68    5.22
  -6  -5  -2    7.08    4.28
  -6   5  -2   10.87    4.56
  -7   5  -2  270.79   11.53
   7   5   2  298.76   10.85
   7   5   2  284.20   12.30
   7  -5   2  270.79   10.56
  -7  -5  -2  274.84   10.98
  -7   5  -2  281.13   10.88
  -8   5  -2   43.92    7.69
   8   5   2   40.57    7.22
   8   5   2   39.46    6.71
   8  -5   2   52.90    7.91
  -8  -5  -2   32.26    5.64
  -8   5  -2   47.73    6.93
  -9   5  -2   -2.89    4.00
   9   5   2   -0.89    3.49
   9   5   2   -4.35    6.09
   9  -5   2    5.19    7.80
  -9  -5  -2   -4.50    5.27
  -9   5  -2    1.35    5.97
 -10   5  -2   89.23    7.52
  10   5   2   91.12    7.34
  10   5   2   90.68    8.46
  10  -5   2   95.68    8.91
 -10  -5  -2   97.58    8.62
 -10   5  -2   92.96    8.44
 -11   5  -2  134.38    8.71
  11   5   2  155.08    9.10
  11   5   2  158.56   11.75
  11  -5   2  160.25   10.67
 -11  -5  -2  165.64   10.31
 -11   5  -2  122.79    8.38
  12   5   2    6.04    5.60
  12   5   2    1.17    8.83
  12  -5   2    0.32    6.75
 -12  -5  -2   -2.39    5.83
 -12   5  -2   -5.78    7.87
  13   5   2    3.18    6.14
  13   5   2   -2.30    7.15
  13  -5   2   -3.26   10.39
 -13  -5  -2    2.84    9.11
 -13   5  -2   -4.44    6.42
  14   5   2   -9.68    6.62
  14   5   2   -5.49    6.95
  14  -5   2   -7.99    7.69
 -14  -5  -2  -13.37    8.64
 -14   5  -2    0.54    7.17
  15   5   2   25.06    8.59
  15  -5   2   35.93   10.86
 -15  -5  -2   33.43   11.24
 -15   5  -2   40.44    8.68
  16   5   2   19.74    8.92
  16  -5   2   12.36   10.42
 -16  -5  -2   17.10   10.72
 -16   5  -2    5.38    8.53
  17   5   2   31.93   11.90
  17  -5   2   31.11   12.20
 -17  -5  -2   36.94   10.97
 -17   5  -2   16.03   10.93
  18   5   2   14.68   12.11
  18  -5   2   39.85   13.27
 -18  -5  -2   24.14    8.45
 -18   5  -2   42.75   12.03
  20   6  -2    0.23   15.14
  20  -6  -2    6.91   13.23
 -20  -6   2    0.76   10.54
 -20   6   2   -4.92   11.98
  19   6  -2   59.75   11.01
  19  -6  -2   84.71   16.03
 -19  -6   2   75.00    8.98
 -19   6   2   99.41   11.88
  18   6  -2   12.62   11.14
  18  -6  -2    7.65    9.62
 -18  -6   2    7.48   10.49
 -18   6   2  -11.02   14.63
  17   6  -2  319.74   18.37
  17  -6  -2  298.31   18.20
 -17  -6   2  290.61   16.48
 -17   6   2  306.82   15.39
  16   6  -2   -0.65    9.71
  16  -6  -2    3.35   11.22
 -16  -6   2    0.97    7.32
 -16   6   2    4.29    9.83
  15   6  -2   -0.53    9.29
  15  -6  -2    4.65    9.01
 -15  -6   2   11.27    6.44
 -15   6   2    5.05   10.00
  14   6  -2   39.72    7.60
  14   6  -2   73.71    9.27
  14  -6  -2  105.36   11.92
 -14  -6   2   72.70    8.71
 -14   6   2   95.11   11.60
  13   6  -2  140.65   10.68
  13   6  -2  168.55   14.12
  13  -6  -2  161.55   12.32
 -13  -6   2  161.73   10.86
 -13   6   2  150.10   10.80
  12   6  -2   40.94    7.26
  12   6  -2   43.44    7.10
  12  -6  -2   52.51    8.04
 -12  -6   2   39.74    6.66
 -12   6   2   39.80    6.75
  11   6  -2   96.14    8.64
  11   6  -2  109.77   11.78
  11  -6  -2  120.41   11.91
 -11  -6   2  115.37    8.48
 -11   6   2  112.22    8.94
 -10   6   2   17.27    5.02
  10   6  -2   43.58    7.01
  10   6  -2   29.26    7.82
  10  -6  -2   45.69    8.57
 -10  -6   2   26.64    6.92
 -10   6   2   39.36    7.73
  -9   6   2    8.52    5.07
   9   6  -2   10.26    6.38
   9   6  -2    9.42    6.84
   9  -6  -2   12.66    6.66
  -9  -6   2   12.39    5.48
  -9   6   2   16.27    5.27
   8   6  -2  892.05   27.82
  -8   6   2  800.95   32.14
   8   6  -2  921.95   29.93
   8  -6  -2  836.03   26.11
   8  -6  -2  956.75   30.56
  -8  -6   2  881.14   27.73
   7   6  -2    4.73    5.24
  -7   6   2    2.85    4.14
   7   6  -2    3.53    5.10
   7  -6  -2    5.73    5.88
   7  -6  -2    4.46    6.70
  -7  -6   2    5.96    5.36
   6   6  -2   17.24    6.12
  -6   6   2   13.14    5.87
   6   6  -2   13.31    6.28
   6  -6  -2   16.68    5.73
   6  -6  -2   16.62    7.80
  -6  -6   2   12.39    4.92
   5   6  -2 2278.71   54.15
  -5   6   2 2408.18   55.06
   5   6  -2 2611.50   58.94
   5  -6  -2 2281.79   55.25
   5  -6  -2 2441.58   54.68
  -5  -6   2 2257.66   54.18
   4   6  -2  178.43    9.12
  -4   6   2  186.51    8.67
   4  -6  -2  178.32    9.46
  -4  -6   2  183.57    8.80
   4  -6  -2  192.08   10.87
  -4  -6   2  193.81    9.78
   3   6  -2   77.50    7.40
  -3   6   2   83.89    6.95
   3  -6  -2   72.36    6.80
  -3  -6   2   70.98    5.92
   3  -6  -2   82.79    8.23
  -3  -6   2   79.57    6.71
   2   6  -2    4.75    5.65
  -2   6   2    2.25    4.56
   2  -6  -2    3.67    4.21
  -2  -6   2   -1.27    3.61
   2  -6  -2    5.23    7.31
  -2  -6   2    2.97    4.80
   1   6  -2    7.24    6.42
  -1   6   2    6.87    5.27
   1  -6  -2    3.76    3.55
  -1  -6   2    5.17    3.69
   1  -6  -2    5.82    6.53
  -1  -6   2    5.92    4.98
   0   6  -2  145.04    9.07
   0   6   2  150.74    7.98
   0  -6   2  147.05    8.10
   0  -6   2  153.49    9.10
   0  -6  -2  133.92    8.55
  -1   6  -2 1456.34   34.97
   1   6   2 1386.39   32.08
   1  -6   2 1412.44   35.03
   1  -6   2 1245.53   53.60
  -1  -6  -2 1296.34   32.78
  -2   6  -2   39.34    7.53
   2   6   2   41.45    5.40
   2  -6   2   47.96    6.28
   2  -6   2   34.99    7.46
  -2  -6  -2   41.76    6.41
  -3   6  -2    2.56    5.89
   3   6   2    6.11    5.12
   3  -6   2    3.41    4.95
   3  -6   2    3.54    5.32
  -3  -6  -2   14.85    5.93
  -4   6  -2 1549.38   37.56
   4   6   2 1481.25   34.86
   4  -6   2 1572.33   36.82
   4  -6   2 1394.17   50.04
  -4  -6  -2 1551.20   35.83
  -5   6  -2   -4.49    4.70
   5   6   2   -0.25    5.72
   5   6   2   -0.81    4.78
   5  -6   2    2.62    5.92
  -5  -6  -2    4.99    5.49
  -5   6  -2   -4.04    4.43
  -6   6  -2   11.66    5.01
   6   6   2   17.89    4.56
   6   6   2   14.99    5.78
   6  -6   2   21.31    6.72
  -6  -6  -2   16.49    5.19
  -6   6  -2   11.27    4.89
  -7   6  -2   -4.18    4.94
   7   6   2    5.36    5.11
   7   6   2   -2.84    5.32
   7  -6   2    5.32    6.74
  -7  -6  -2    2.49    4.86
  -7   6  -2   -2.39    6.03
  -8   6  -2   12.49    5.71
   8   6   2   13.99    6.24
   8   6   2   12.49    6.23
   8  -6   2   11.65    5.08
  -8  -6  -2   19.97    7.83
  -8   6  -2    7.72    5.56
  -9   6  -2    8.91    6.21
   9   6   2    1.97    5.26
   9   6   2    2.11    5.98
   9  -6   2    4.35    5.36
  -9  -6  -2    3.45    6.91
  -9   6  -2    4.26    4.92
  10   6   2  850.13   22.34
  10   6   2  936.90   28.89
  10  -6   2  823.68   22.94
 -10  -6  -2  925.69   23.20
 -10   6  -2  894.47   23.86
 -11   6  -2    1.79    5.90
  11   6   2    7.87    6.85
  11   6   2    4.34    7.42
  11  -6   2   11.22    9.77
 -11  -6  -2   13.35    6.34
 -11   6  -2    5.26    7.43
  12   6   2   44.04    7.97
  12   6   2   24.60    7.73
  12  -6   2   36.50    9.61
 -12  -6  -2   36.93    8.40
 -12   6  -2   51.51    7.75
  13   6   2  405.95   17.24
  13   6   2  429.32   18.66
  13  -6   2  381.03   16.03
 -13  -6  -2  468.11   16.88
 -13   6  -2  445.71   16.95
  14   6   2    1.40    7.17
  14   6   2    7.97    7.61
  14  -6   2    7.39    8.50
 -14  -6  -2   10.31    7.61
 -14   6  -2   13.03    9.19
  15   6   2   41.77   10.37
  15  -6   2   42.58    9.78
 -15  -6  -2   44.89    7.92
 -15   6  -2   44.27   11.36
  16   6   2    0.63   10.63
  16  -6   2  -15.50   12.83
 -16  -6  -2   -1.46    7.49
 -16   6  -2   -7.72    6.72
  17   6   2   -0.82   12.72
  17  -6   2   18.58   13.37
 -17  -6  -2   42.60    8.35
 -17   6  -2   19.77    8.83
  18  -6   2    4.67   11.23
 -18  -6  -2   -5.46    8.50
 -18   6  -2   10.79    9.65
  19   7  -2    6.76   10.66
  19  -7  -2    6.71   15.26
 -19  -7   2   10.73   12.79
 -19   7   2   -4.85   10.20
  18   7  -2   73.20   15.42
  18  -7  -2   54.36   14.98
 -18  -7   2   61.42   12.57
 -18   7   2   67.00   15.32
  17   7  -2  344.99   20.32
  17  -7  -2  369.87   23.15
 -17  -7   2  377.31   21.03
 -17   7   2  325.00   20.26
  16   7  -2  182.81   13.22
  16  -7  -2  259.49   17.12
 -16  -7   2  235.54   14.10
 -16   7   2  241.49   13.38
  15   7  -2   29.42   10.82
  15  -7  -2   16.82    8.96
 -15  -7   2   35.49    9.04
 -15   7   2   39.54    7.39
  14   7  -2  132.20   10.84
  14   7  -2  115.50   15.14
  14  -7  -2  148.75   14.09
 -14  -7   2  125.61   12.12
 -14   7   2  133.58    9.54
  13   7  -2  131.78   10.52
  13   7  -2  150.74   10.62
  13  -7  -2  172.69   13.19
 -13  -7   2  137.33   10.46
  12   7  -2  443.25   20.32
  12   7  -2  396.91   20.37
  12  -7  -2  396.50   18.04
 -12  -7   2  386.82   18.46
 -12   7   2  425.80   19.32
  11   7  -2  223.96   11.74
  11   7  -2  242.27   14.95
  11  -7  -2  223.65   12.61
 -11  -7   2  203.81   11.05
 -11   7   2  237.35   12.37
 -10   7   2   66.47    7.78
  10   7  -2  101.41    8.41
  10   7  -2   75.91    9.02
  10  -7  -2   81.99    8.85
 -10  -7   2   95.49    7.41
 -10   7   2   78.62   10.13
   9   7  -2  543.38   19.91
   9   7  -2  498.25   19.82
   9  -7  -2  527.49   19.56
  -9  -7   2  504.99   17.64
  -9   7   2  507.03   17.95
   8   7  -2 1049.35   32.29
  -8   7   2 1003.29   35.25
   8   7  -2 1206.32   38.25
   8  -7  -2 1133.61   35.43
   8  -7  -2  991.12   32.38
  -8  -7   2 1034.47   33.56
   7   7  -2  125.64    8.61
  -7   7   2  139.39    8.75
   7   7  -2  118.68    9.13
   7  -7  -2  112.36    9.18
   7  -7  -2  123.28    8.88
  -7  -7   2  150.58    9.07
   6   7  -2   23.50    6.82
  -6   7   2   25.74    5.90
   6   7  -2   27.96    6.02
   6  -7  -2   24.24    5.91
   6  -7  -2   25.30    7.40
  -6  -7   2   26.63    6.58
   5   7  -2   82.25    7.96
  -5   7   2   67.90    6.53
   5  -7  -2   62.26    6.75
  -5  -7   2   65.34    6.22
   5  -7  -2   70.91    9.06
  -5  -7   2   81.86    7.23
   4   7  -2   56.69    6.66
  -4   7   2   77.01    7.06
   4  -7  -2   75.72    6.81
  -4  -7   2   64.13    5.72
   4  -7  -2   77.06    7.97
  -4  -7   2   71.30    7.24
   3   7  -2  222.27   10.47
  -3   7   2  230.28    9.77
   3  -7  -2  211.47    9.51
  -3  -7   2  179.39    8.17
   3  -7  -2  226.76   11.53
  -3  -7   2  210.77   10.46
   2   7  -2  346.44   11.53
  -2   7   2  334.53   11.14
   2  -7  -2  288.50   10.97
  -2  -7   2  345.53   11.19
   2  -7  -2  379.02   15.07
  -2  -7   2  309.26   11.92
   1   7  -2    3.71    4.15
  -1   7   2   -2.67    4.15
   1  -7  -2    0.94    3.29
  -1  -7   2    1.82    4.13
   1  -7  -2   -5.23    5.93
  -1  -7   2    0.12    5.41
   0   7  -2   -1.22    5.14
   0   7   2    2.40    5.43
   0  -7   2   -2.31    4.86
   0  -7   2    3.99    5.76
   0  -7  -2   -6.42    5.48
  -1   7  -2  137.28    7.68
   1   7   2  148.26    8.31
   1  -7   2  138.32    8.21
   1  -7   2  149.56   10.53
  -1  -7  -2  141.28   10.18
  -2   7  -2    6.00    5.63
   2   7   2    2.03    5.19
   2  -7   2    4.28    5.49
   2  -7   2    1.80    5.66
  -2  -7  -2    2.48    5.49
  -3   7  -2   49.45    6.68
   3   7   2   48.49    7.23
   3  -7   2   53.01    6.30
   3  -7   2   49.12    7.20
  -3  -7  -2   54.55    8.19
  -4   7  -2  122.01    8.52
   4   7   2  121.31    7.76
   4  -7   2  112.80    8.22
   4  -7   2  103.83    8.92
  -4  -7  -2  104.06    7.21
  -5   7  -2   63.12    7.09
   5   7   2   56.43    6.80
   5   7   2   36.27    6.35
   5  -7   2   58.85    7.40
   5  -7   2   56.77    8.02
  -5  -7  -2   62.80    6.40
  -6   7  -2   24.06    6.45
   6   7   2   19.46    6.22
   6   7   2   15.18    6.01
   6  -7   2   20.17    7.11
  -6  -7  -2   19.46    6.64
  -6   7  -2   26.09    6.56
  -7   7  -2  258.57   11.97
   7   7   2  275.98   10.73
   7   7   2  229.77   14.57
   7  -7   2  272.42   11.26
  -7  -7  -2  281.07   11.39
  -7   7  -2  268.76   11.99
  -8   7  -2   -2.93    4.91
   8   7   2    8.20    6.56
   8   7   2    5.67    6.27
   8  -7   2    1.35    6.62
  -8  -7  -2    4.07    5.67
  -8   7  -2    0.60    5.97
  -9   7  -2   82.81    8.41
   9   7   2   98.34    7.61
   9   7   2   83.54    8.67
   9  -7   2   96.78    9.61
  -9  -7  -2   86.16    7.08
  -9   7  -2   95.19    8.35
 -10   7  -2    0.89    6.67
  10   7   2    5.43    5.47
  10   7   2    2.22    7.32
  10  -7   2    3.10    9.29
 -10  -7  -2   -3.03    6.85
 -10   7  -2    4.61    4.67
 -11   7  -2  142.14    9.74
  11   7   2  164.62    9.44
  11   7   2  172.89   12.61
  11  -7   2  183.37   13.22
 -11  -7  -2  158.74   10.16
 -11   7  -2  214.58   15.03
  12   7   2   36.39    7.01
  12   7   2   21.33    8.37
  12  -7   2   26.63   10.13
 -12  -7  -2   22.06    7.93
 -12   7  -2   23.10    7.22
  13   7   2    5.78    6.42
  13   7   2    7.62    9.48
  13  -7   2    4.55    7.00
 -13  -7  -2   -8.39    9.79
 -13   7  -2   -4.67    6.63
  14   7   2   16.85    8.17
  14   7   2   21.95    9.96
  14  -7   2   21.58   12.51
 -14  -7  -2   14.38    8.13
 -14   7  -2   14.61   10.97
  15   7   2  145.77   12.84
  15  -7   2  188.27   16.19
 -15  -7  -2  197.80   15.29
 -15   7  -2  202.48   14.28
  16  -7   2   29.00    8.31
 -16  -7  -2   33.16   11.25
 -16   7  -2   27.32   12.43
  17  -7   2   31.38    9.72
 -17  -7  -2   43.07   10.81
 -17   7  -2   24.54    9.30
  18  -7   2   -0.77   11.02
 -18  -7  -2    8.57   13.87
 -18   7  -2   -1.39    9.89
  19  -8  -2   57.78   12.95
 -19  -8   2   33.32   12.79
 -19   8   2   48.76   12.97
  18   8  -2   -0.15   10.36
  18  -8  -2   -1.64   12.03
 -18  -8   2   -0.06   10.98
 -18   8   2  -14.86   12.46
  17   8  -2  131.48   13.28
  17  -8  -2  155.32   14.78
 -17  -8   2  154.56   12.27
 -17   8   2  156.56   12.50
  16   8  -2    2.98    9.24
  16  -8  -2   -3.70    9.68
 -16  -8   2    4.25    9.71
 -16   8   2    3.50    6.85
  15   8  -2    1.92    9.12
  15   8  -2   -1.51   11.57
  15  -8  -2   -9.15   12.97
 -15  -8   2   -1.22    9.85
 -15   8   2    1.72    6.41
  14   8  -2  350.10   19.42
  14   8  -2  379.48   20.07
  14  -8  -2  440.18   20.26
 -14  -8   2  394.72   19.84
 -14   8   2  327.68   18.17
  13   8  -2   90.81    9.31
  13   8  -2   59.24    8.92
  13  -8  -2   91.74   11.12
 -13  -8   2   68.06    7.75
 -13   8   2   87.81   11.10
  12   8  -2   17.07    8.14
  12   8  -2    5.22    7.59
  12  -8  -2   -0.52    9.95
 -12  -8   2   11.08    6.85
 -12   8   2   -4.39    5.75
 -11   8   2    2.58    5.78
  11   8  -2    2.30    6.46
  11   8  -2    3.34   10.43
  11  -8  -2    0.99    7.06
 -11  -8   2    6.11    7.20
 -11   8   2   12.23    7.84
 -10   8   2  141.86    9.42
  10   8  -2  165.01    9.43
  10   8  -2  164.26   11.96
  10  -8  -2  184.98   12.97
 -10  -8   2  165.41    9.80
 -10   8   2  156.64    9.55
  -9   8   2    6.39    6.84
   9   8  -2   22.97    8.18
   9   8  -2    8.12    6.80
   9  -8  -2    4.09    7.80
   9  -8  -2    9.94    9.90
  -9  -8   2    8.86    6.32
  -8   8   2  817.94   30.40
   8   8  -2  924.74   29.27
   8   8  -2  939.63   30.94
   8  -8  -2  762.86   28.63
   8  -8  -2  887.53   28.77
  -8  -8   2  798.01   25.96
   7   8  -2    9.80    7.94
  -7   8   2    1.85    6.13
   7   8  -2    9.95    7.01
   7  -8  -2    5.46    6.75
   7  -8  -2    7.34    6.50
  -7  -8   2    0.27    6.30
   6   8  -2    3.65    4.86
  -6   8   2    5.47    6.17
   6  -8  -2    2.35    6.17
  -6  -8   2    8.45    5.25
   6  -8  -2   -4.13    8.78
  -6  -8   2    3.11    5.38
   5   8  -2  689.54   23.92
  -5   8   2  611.14   22.04
  -5  -8   2  644.92   22.50
   5  -8  -2  709.63   24.95
  -5  -8   2  657.01   24.55
   4   8  -2  117.06    8.31
  -4   8   2  116.10    7.82
   4  -8  -2  120.29    7.86
  -4  -8   2  114.21    7.17
   4  -8  -2  128.26   10.35
  -4  -8   2  124.70    8.15
   3   8  -2    8.49    6.28
  -3   8   2   16.28    6.67
   3  -8  -2    9.52    4.53
  -3  -8   2   14.13    4.65
   3  -8  -2   12.09    6.49
  -3  -8   2    7.55    5.49
   2   8  -2   99.17    7.19
  -2   8   2   85.87    7.06
   2  -8  -2   88.22    7.03
  -2  -8   2   84.62    6.64
   2  -8  -2   98.45    8.71
  -2  -8   2   72.06    7.15
   1   8  -2  195.53   10.28
  -1   8   2  215.52   10.07
   1  -8  -2  178.24    8.80
  -1  -8   2  176.84    8.51
   1  -8  -2  202.72   10.42
  -1  -8   2  198.53    9.89
   0   8  -2   89.48    7.97
   0   8   2   88.19    7.36
   0  -8   2   91.27    7.23
   0  -8   2   81.84    7.41
   0  -8  -2   80.94    7.72
  -1   8  -2 1552.58   28.56
   1   8   2 1509.71   26.70
   1  -8   2 1600.75   31.59
   1  -8   2 1649.40   36.41
  -1  -8  -2 1568.06   30.83
  -2   8  -2   33.72    6.63
   2   8   2   25.08    5.39
   2  -8   2   29.41    5.92
   2  -8   2   26.40    6.76
  -2  -8  -2   24.83    6.72
  -3   8  -2   10.80    6.89
   3   8   2    8.87    6.24
   3  -8   2    7.35    5.59
   3  -8   2    7.21    6.14
  -3  -8  -2   10.72    6.87
  -4   8  -2 1037.41   31.35
   4   8   2  959.47   28.21
   4  -8   2  930.93   27.22
   4  -8   2  833.61   29.61
  -4  -8  -2  973.09   28.32
  -5   8  -2  100.21    8.48
   5   8   2   89.36    6.85
   5  -8   2   89.28    6.91
   5  -8   2   87.68    9.06
  -5  -8  -2   88.32    8.08
  -6   8  -2  234.70   11.59
   6  -8   2  235.07   10.66
  -6  -8  -2  231.68   11.73
  -7   8  -2   -0.38    6.89
   7   8   2    3.99    6.32
   7   8   2   -3.19    5.90
   7  -8   2    5.40    6.96
  -7  -8  -2    4.97    6.90
  -7   8  -2    2.78    5.70
  -8   8  -2   22.09    7.19
   8   8   2   21.12    7.65
   8   8   2   10.00    6.22
   8  -8   2   19.30    8.54
  -8  -8  -2   17.90    7.67
  -8   8  -2   21.70    6.45
  -9   8  -2    0.74    7.27
   9   8   2    3.18    7.52
   9   8   2   -8.44    5.82
   9  -8   2   11.88    8.79
  -9  -8  -2    3.61    7.29
  -9   8  -2    2.33    5.65
 -10   8  -2  474.97   28.01
  10   8   2  522.58   29.46
  10  -8   2  539.19   30.74
 -10  -8  -2  505.86   27.98
 -10   8  -2  464.51   27.08
 -11   8  -2   47.04    7.31
  11   8   2   51.94    8.54
  11   8   2   46.97    8.24
  11  -8   2   63.81    8.19
 -11  -8  -2   48.49    7.27
 -11   8  -2   65.12    8.94
  12   8   2    2.05    6.70
  12   8   2   -0.22    6.54
  12  -8   2   -0.89    9.75
 -12  -8  -2   -2.93    6.05
 -12   8  -2    0.50    8.26
  13   8   2  180.53   12.28
  13  -8   2  185.72   14.24
 -13  -8  -2  172.59   11.60
 -13   8  -2  174.85   14.67
  14   8   2   38.09    9.40
  14  -8   2   27.83    9.66
 -14  -8  -2   34.11    9.91
 -14   8  -2   40.93   10.52
  15  -8   2   20.34   10.43
 -15  -8  -2    6.71    7.28
 -15   8  -2    1.29    8.35
  16  -8   2    0.49   12.33
 -16  -8  -2   -7.14   10.70
 -16   8  -2    4.40   11.12
  17  -8   2   -7.74   13.84
 -17  -8  -2    4.55   11.26
 -17   8  -2   -4.87    9.76
  18  -9  -2   65.17   16.80
 -18  -9   2   32.09   10.21
 -18   9   2   51.33   11.79
  17  -9  -2  388.63   22.17
 -17  -9   2  343.62   19.06
 -17   9   2  395.46   21.40
  16   9  -2   59.99   13.56
  16  -9  -2   82.01   16.38
 -16  -9   2   85.98   11.98
 -16   9   2   96.94   10.44
  15   9  -2   43.34   10.44
  15   9  -2   44.64   11.34
  15  -9  -2   63.45   12.84
 -15  -9   2   43.27    8.73
 -15   9   2   62.20    9.98
  14   9  -2   49.82    9.49
  14   9  -2   41.23    9.23
  14  -9  -2   40.79    8.92
 -14  -9   2   56.84   10.46
 -14   9   2   53.93    8.50
  13   9  -2   71.03    7.94
  13   9  -2   68.97    8.37
  13  -9  -2   69.99   13.27
 -13  -9   2   78.09   10.54
 -13   9   2   91.69   12.11
  12   9  -2  122.41    9.28
  12   9  -2  113.72   10.14
  12  -9  -2  137.82   10.89
 -12  -9   2  127.97    8.22
 -12   9   2  148.53   10.20
 -11   9   2  103.87    9.69
  11   9  -2  135.60   10.10
  11   9  -2  135.48   12.18
  11  -9  -2  136.61   11.28
 -11  -9   2  136.73   10.46
 -11   9   2  157.31   11.32
 -10   9   2   -1.15    7.84
  10   9  -2    1.16    8.62
  10   9  -2   16.01    8.67
  10  -9  -2    3.82    8.14
 -10  -9   2    8.25    7.08
 -10   9   2   10.15    9.74
  -9   9   2  139.34   11.72
   9   9  -2  185.02   11.62
   9   9  -2  186.79   12.36
   9  -9  -2  161.44    9.78
   9  -9  -2  177.06   12.52
  -9  -9   2  191.39   11.47
   8   9  -2  520.22   19.02
  -8   9   2  492.41   21.60
   8  -9  -2  552.27   22.52
  -8  -9   2  552.21   19.48
   8  -9  -2  550.55   22.54
  -8  -9   2  517.26   20.02
   7   9  -2  137.43    9.57
  -7   9   2  132.66    9.45
   7  -9  -2  125.16    9.15
  -7  -9   2  143.46    8.67
   7  -9  -2  148.76   11.86
  -7  -9   2  165.31   10.59
   6   9  -2   56.79    7.69
  -6   9   2   69.22    8.53
   6  -9  -2   46.91    6.42
  -6  -9   2   64.75    7.11
   6  -9  -2   69.47    9.69
  -6  -9   2   63.16    9.12
   5   9  -2   28.16    5.89
  -5   9   2   27.40    7.33
   5  -9  -2   31.46    6.94
  -5  -9   2   32.01    6.26
   5  -9  -2   31.00    8.37
  -5  -9   2   29.51    6.95
   4   9  -2    2.22    6.63
  -4   9   2   -1.21    5.75
   4  -9  -2    1.83    5.08
  -4  -9   2   -0.62    4.40
   4  -9  -2   -3.70    6.54
  -4  -9   2   -2.70    6.74
   3   9  -2  156.37    9.16
  -3   9   2  142.25    9.27
   3  -9  -2  141.94    8.73
  -3  -9   2  151.48    8.12
   3  -9  -2  151.36   11.54
  -3  -9   2  154.80    9.77
   2   9  -2    4.09    5.15
  -2   9   2    0.01    5.84
   2  -9  -2    1.09    4.20
  -2  -9   2    5.62    4.89
   2  -9  -2   -0.23    6.24
  -2  -9   2    0.44    5.63
   1   9  -2   40.09    8.19
  -1   9   2   44.14    8.14
   1  -9  -2   34.36    5.26
  -1  -9   2   48.67    6.62
   1  -9  -2   42.73    8.59
  -1  -9   2   42.93    6.77
   0   9  -2   33.31    7.08
   0   9   2   31.13    6.70
   0  -9   2   27.64    7.02
   0  -9   2   32.31    7.30
   0  -9  -2   35.39    6.85
  -1   9  -2  201.61   11.13
   1   9   2  185.29    9.20
   1  -9   2  183.76    9.68
   1  -9   2  194.76   12.01
  -1  -9  -2  202.17   10.34
  -2   9  -2    6.79    5.47
   2   9   2   -5.90    5.95
   2  -9   2    4.81    5.79
   2  -9   2    1.81    7.43
  -2  -9  -2    6.04    5.97
  -3   9  -2   10.66    7.59
   3   9   2   18.25    6.28
   3  -9   2   12.18    6.11
   3  -9   2   19.24    9.07
  -3  -9  -2   11.98    7.72
  -4   9  -2    6.59    7.63
   4   9   2    2.32    6.19
   4  -9   2   -0.05    5.01
   4  -9   2    7.02    7.05
  -4  -9  -2   14.83    7.17
  -5   9  -2   25.47    8.51
   5   9   2   29.92    7.62
   5  -9   2   36.15    7.95
   5  -9   2   10.94    6.29
  -5  -9  -2   36.76    8.28
  -6   9  -2    4.27    7.98
   6   9   2   -1.34    6.95
   6  -9   2    4.56    6.83
   6  -9   2    4.08    9.24
  -6  -9  -2    2.66    7.36
  -7   9  -2  106.49   10.31
   7   9   2  105.65    8.76
   7  -9   2   95.51   10.18
  -7  -9  -2  112.85    9.29
  -7   9  -2  113.01    8.85
  -8   9  -2   62.95    9.81
   8   9   2   41.10    7.35
   8  -9   2   49.94    7.88
  -8  -9  -2   36.09    7.53
  -8   9  -2   51.63    7.28
  -9   9  -2    8.25    8.38
   9   9   2    8.70    5.93
   9  -9   2   15.04    9.37
  -9  -9  -2    5.26    6.40
  -9   9  -2    3.45    5.27
 -10   9  -2  101.35    9.76
  10   9   2   96.08    7.73
  10  -9   2  102.32    9.41
 -10  -9  -2   97.57   10.99
 -10   9  -2  116.86   10.88
 -11   9  -2   44.41    8.78
  11   9   2   58.85    6.80
  11  -9   2   47.99    9.36
 -11  -9  -2   49.08    8.02
 -11   9  -2   50.90    7.42
  12   9   2    6.40    8.51
  12  -9   2    0.36    8.76
 -12  -9  -2   -5.98   10.94
 -12   9  -2   -5.83    8.04
  13   9   2   30.35   10.61
  13  -9   2   15.70   10.01
 -13  -9  -2   22.26    7.19
 -13   9  -2   23.77    9.43
  14   9   2   11.87    9.22
  14  -9   2    9.89   10.88
 -14  -9  -2    6.10    7.43
 -14   9  -2    7.61    7.87
  15  -9   2    7.62   11.67
 -15  -9  -2    6.61   10.24
 -15   9  -2   37.32    8.85
  16  -9   2   72.36   13.08
 -16  -9  -2   75.51    8.90
 -16   9  -2   48.82   13.92
  17 -10  -2   25.70   10.55
 -17 -10   2   43.45    8.96
 -17  10   2   40.24   13.44
  16 -10  -2    4.69   16.59
 -16 -10   2    2.23   10.33
 -16  10   2    4.10    9.69
  15  10  -2    8.09    9.40
  15 -10  -2   16.38    8.89
 -15 -10   2    4.31    8.24
 -15  10   2   21.72   10.75
  14  10  -2   51.33    9.77
  14  10  -2   38.44   12.14
  14 -10  -2   73.13   12.29
 -14 -10   2   63.66    7.87
 -14  10   2   37.77   11.39
  13  10  -2   27.74   11.22
  13  10  -2   11.93   10.22
  13 -10  -2    9.64   13.48
 -13 -10   2   11.33    6.84
 -13  10   2   27.07    9.11
  12  10  -2   11.61    9.35
  12  10  -2    6.88    8.32
  12 -10  -2   18.38    8.94
 -12 -10   2   19.37    7.93
 -12  10   2    9.06   11.90
 -11  10   2   -3.18    7.05
  11  10  -2   -3.96    5.73
  11  10  -2    0.52    7.50
  11 -10  -2   -2.25    9.69
 -11 -10   2    7.46    5.99
 -11  10   2   -1.91    7.44
 -10  10   2   98.95    9.58
  10  10  -2  129.82   10.10
  10  10  -2  120.97   11.02
  10 -10  -2  129.66   11.13
  10 -10  -2  124.40   14.12
 -10 -10   2  123.55    9.41
  -9  10   2   24.95    8.28
   9  10  -2   33.04    7.11
   9 -10  -2   24.97    6.38
  -9 -10   2   23.94    5.58
   9 -10  -2   39.30   13.04
  -9 -10   2   35.96    8.47
  -8  10   2  126.39   10.68
   8  10  -2  118.16    8.19
   8 -10  -2  150.44   11.83
  -8 -10   2  125.77    8.62
   8 -10  -2  134.76   12.61
  -8 -10   2  114.37   10.86
   7  10  -2    5.09    5.89
  -7  10   2    4.47    8.36
   7 -10  -2    2.95    7.56
  -7 -10   2   -1.80    5.19
   7 -10  -2    5.88   10.05
  -7 -10   2   -0.84    8.62
   6  10  -2    3.04    6.29
  -6  10   2    8.73    7.30
   6 -10  -2    1.58    5.73
  -6 -10   2   10.87    5.51
   6 -10  -2    6.29    7.17
  -6 -10   2    8.26    7.42
   5  10  -2   35.44    7.97
  -5  10   2   46.01    8.81
   5 -10  -2   41.80    7.14
  -5 -10   2   31.93    6.17
   5 -10  -2   39.70    9.40
  -5 -10   2   47.10   10.02
   4  10  -2    6.15    7.89
  -4  10   2    4.05    5.73
   4 -10  -2    6.78    5.46
  -4 -10   2    5.19    5.07
   4 -10  -2   10.81    7.67
  -4 -10   2   -2.23    8.71
   3  10  -2   49.36    7.80
  -3  10   2   58.00    6.15
   3 -10  -2   43.79    6.00
  -3 -10   2   65.02    6.48
   3 -10  -2   54.95    7.29
  -3 -10   2   35.82    6.84
   2  10  -2    3.56    8.39
  -2  10   2    5.07    5.00
   2 -10  -2    4.10    3.95
  -2 -10   2    2.46    5.71
   2 -10  -2    5.11    5.50
  -2 -10   2    5.12    7.14
   1  10  -2  224.04   10.58
  -1  10   2  262.49   12.45
  -1 -10   2  223.13   10.54
   1 -10  -2  226.75   10.61
  -1 -10   2  234.29   11.46
   0  10  -2   35.05    8.34
   0  10   2   30.61    6.64
   0 -10   2   36.29    7.06
   0 -10   2   47.03    8.51
   0 -10  -2   35.67    6.50
  -1  10  -2  467.90   18.67
   1  10   2  463.27   16.41
   1 -10   2  505.20   18.80
   1 -10   2  508.53   20.37
  -1 -10  -2  464.96   17.94
  -2  10  -2    0.99    7.98
   2  10   2    4.62    7.13
   2 -10   2    2.57    5.06
   2 -10   2   -0.55    7.98
  -2 -10  -2    9.54    9.25
  -3  10  -2   60.94    7.65
   3  10   2   67.23    7.41
   3 -10   2   57.74    6.77
   3 -10   2   46.68    9.28
  -3 -10  -2   77.55   10.28
  -4  10  -2   28.87    6.39
   4  10   2   20.34    6.90
   4 -10   2   23.39    6.79
   4 -10   2   19.18    9.50
  -4 -10  -2   23.42    8.63
  -5  10  -2   27.57    8.46
   5  10   2   19.60    7.72
   5 -10   2   20.51    5.56
   5 -10   2   18.11    9.44
  -5 -10  -2   23.81    8.88
  -6  10  -2   19.56    5.96
   6  10   2   18.50    7.54
   6 -10   2   10.89    7.39
   6 -10   2   13.79    9.23
  -6 -10  -2    8.99    8.62
  -7  10  -2    4.13    8.26
   7  10   2   12.75    8.99
   7 -10   2    3.73    7.96
  -7 -10  -2    1.07    7.69
  -7  10  -2    7.09    6.57
  -8  10  -2   26.33    9.42
   8  10   2   18.32    6.48
   8 -10   2   23.16    9.18
  -8 -10  -2   19.41    7.21
  -8  10  -2   20.23    7.17
  -9  10  -2  217.77   12.97
   9  10   2  198.26   12.95
   9 -10   2  178.55   11.29
  -9 -10  -2  192.51   10.59
  -9  10  -2  196.58   12.32
 -10  10  -2   52.15    8.71
  10  10   2   58.90   10.35
  10 -10   2   74.74   10.10
 -10 -10  -2   64.38    7.23
 -10  10  -2   74.19   11.40
 -11  10  -2   35.03    9.72
  11  10   2   47.07   10.57
  11 -10   2   51.67    8.75
 -11 -10  -2   47.17   10.66
 -11  10  -2   43.61    9.67
  12  10   2   24.54    9.22
  12 -10   2    8.04   10.92
 -12 -10  -2    4.03    9.71
 -12  10  -2    1.38    8.47
  13  10   2   48.50    8.63
  13 -10   2   57.97   11.71
 -13 -10  -2   43.70    9.57
 -13  10  -2   46.89   10.47
  14  10   2   23.12   10.56
  14 -10   2   19.50    8.89
 -14 -10  -2   17.95   11.67
 -14  10  -2   32.49   11.09
  15 -10   2   42.55   11.53
 -15 -10  -2   63.09    9.83
 -15  10  -2   70.82   12.29
  16 -10   2    2.14   11.06
 -16 -10  -2   -0.67   11.39
 -16  10  -2    6.65   10.06
  16 -11  -2   34.93   14.92
 -16 -11   2   22.45    9.90
 -16  11   2   34.18   13.16
  15  11  -2    7.49   12.99
  15 -11  -2   18.73   14.15
 -15 -11   2   13.98    8.32
 -15  11   2    2.89   12.69
  14  11  -2   -0.08    9.59
  14 -11  -2    8.34   10.68
 -14 -11   2    7.71    7.01
 -14  11   2    2.66   10.02
  13  11  -2   -6.64    8.70
  13 -11  -2    4.31   12.49
 -13 -11   2    0.25    6.51
 -13  11   2    5.25    9.14
  12  11  -2   52.24   10.66
  12 -11  -2   58.34   10.80
 -12 -11   2   62.68   11.06
 -12  11   2   61.82   11.72
 -11  11   2   15.49    8.99
  11  11  -2   23.03   11.34
  11 -11  -2   25.96   12.26
 -11 -11   2    8.19    8.24
 -11  11   2   19.23    8.33
 -10  11   2   13.63    8.97
  10  11  -2   27.08    9.85
  10 -11  -2   14.51   11.13
 -10 -11   2   14.71    6.67
  10 -11  -2    8.59   13.50
 -10 -11   2   22.65    9.78
  -9  11   2   23.35    7.86
   9  11  -2   25.11    7.71
   9 -11  -2   15.88    8.35
  -9 -11   2   16.36    7.44
   9 -11  -2    5.76   10.55
  -9 -11   2   20.58   10.89
   8  11  -2   44.37    7.08
  -8  11   2   53.76    8.88
   8 -11  -2   43.25    7.68
  -8 -11   2   36.40    6.74
   8 -11  -2   43.11   11.44
  -8 -11   2   66.37   10.17
   7  11  -2    6.22    6.61
  -7  11   2    3.93    6.77
   7 -11  -2   16.43    8.52
  -7 -11   2    6.83    5.26
   7 -11  -2   15.77    9.48
  -7 -11   2   14.11    8.62
   6  11  -2   15.33    6.50
  -6  11   2   22.69    7.36
   6 -11  -2    9.94    7.52
  -6 -11   2   15.70    4.74
   6 -11  -2   16.74   13.27
  -6 -11   2   22.21    9.78
   5  11  -2    5.60    8.98
  -5  11   2   22.46   10.86
   5 -11  -2   13.48    6.28
  -5 -11   2   11.51    4.84
   5 -11  -2   11.46    9.00
  -5 -11   2   20.45    8.19
   4  11  -2    9.44    8.44
  -4  11   2   14.87    7.69
   4 -11  -2   11.28    5.48
  -4 -11   2    3.81    4.20
   4 -11  -2   -1.97    8.32
  -4 -11   2   -1.27    6.37
   3  11  -2    1.97    6.58
  -3  11   2    4.25    6.90
   3 -11  -2    7.27    4.74
  -3 -11   2    2.69    5.04
   3 -11  -2    1.77    8.51
  -3 -11   2   -1.52    6.83
   2  11  -2   65.62    8.02
  -2  11   2   70.59    8.88
  -2 -11   2   63.60    6.37
   2 -11  -2   73.31    8.65
  -2 -11   2   73.57    9.83
   1  11  -2   -4.14    8.41
  -1  11   2    2.67    5.62
  -1 -11   2    5.45    5.49
   1 -11  -2    8.21    8.70
  -1 -11   2    7.66    7.86
   0  11  -2    6.93    6.11
   0  11   2   -1.97    6.84
   0 -11   2    3.94    5.91
   0 -11   2   -0.90    6.81
   0 -11  -2    0.83    6.21
  -1  11  -2   10.30    6.01
   1  11   2    5.00    6.30
   1 -11   2   -1.34    5.93
   1 -11   2    2.34    6.81
  -1 -11  -2    4.87    8.41
  -2  11  -2    2.30    6.09
   2  11   2   -0.79    5.61
   2 -11   2   -5.87    6.21
   2 -11   2   -4.33    8.91
  -2 -11  -2   -1.48    8.05
  -3  11  -2    2.95    5.34
   3  11   2    1.78    7.31
   3 -11   2   -0.89    6.44
   3 -11   2    2.61    9.13
  -3 -11  -2    5.93    8.73
  -4  11  -2   37.09    9.44
   4  11   2   56.60    7.37
   4 -11   2   47.70    7.11
   4 -11   2   26.23    7.49
  -4 -11  -2   41.45    7.99
  -5  11  -2   28.10    9.35
   5  11   2   18.99    6.27
   5 -11   2   14.95    6.65
   5 -11   2   22.76    9.45
  -5 -11  -2   25.19    9.51
  -6  11  -2    9.42    8.57
   6  11   2    3.31    5.56
   6 -11   2    9.02    7.69
   6 -11   2   -4.53    8.61
  -6 -11  -2   21.03   10.15
  -7  11  -2    3.00    9.57
   7  11   2    3.93    7.98
   7 -11   2    2.46    6.95
  -7 -11  -2    1.70    7.46
  -7  11  -2   -2.17    7.85
  -8  11  -2   -0.19    7.78
   8  11   2    1.51    8.35
   8 -11   2    9.10    7.09
  -8 -11  -2   -0.47   10.30
  -8  11  -2   -0.99    8.24
  -9  11  -2   25.65    9.36
   9  11   2   22.02    7.48
   9 -11   2   11.23   11.27
  -9 -11  -2   21.94   10.55
  -9  11  -2   10.74    8.96
 -10  11  -2   17.13    8.87
  10  11   2   19.08    7.16
  10 -11   2   12.03    7.33
 -10 -11  -2    3.41   10.70
 -10  11  -2   16.14    8.05
  11  11   2   46.08   11.37
  11 -11   2   39.74   10.33
 -11 -11  -2   60.57    8.09
 -11  11  -2   56.99   11.37
  12  11   2   -3.36    6.75
  12 -11   2   -4.04    9.63
 -12 -11  -2   -6.09    7.00
 -12  11  -2    2.77   10.50
  13  11   2    0.47    8.32
  13 -11   2    7.20   11.86
 -13 -11  -2  -10.00    9.22
 -13  11  -2    6.51    9.20
  14  11   2   -5.15   12.14
  14 -11   2    3.28   10.86
 -14 -11  -2   -3.57    8.52
 -14  11  -2   13.09    8.89
  15 -11   2   33.00   16.67
 -15 -11  -2   30.79   10.20
 -15  11  -2   12.00   11.26
  15 -12  -2    2.23   16.70
 -15 -12   2    3.35    9.37
 -15  12   2   -0.77   11.81
  14  12  -2   13.69   10.44
  14 -12  -2   -1.47   12.32
 -14 -12   2    1.98   10.31
 -14  12   2    6.44   12.72
  13  12  -2  113.06   10.69
  13 -12  -2  102.26   12.11
 -13 -12   2   99.47   10.27
 -13  12   2   89.60   12.64
  12  12  -2   11.01    9.68
  12 -12  -2   -4.91   13.48
 -12 -12   2    4.86   10.42
 -12  12   2   -2.58   11.49
  11  12  -2    4.83   10.27
  11 -12  -2   -6.19   11.57
 -11 -12   2  -10.21    9.41
 -11  12   2   -3.26    8.13
 -10  12   2   52.81    9.16
  10  12  -2   72.60    9.83
  10 -12  -2   60.24    9.42
  10 -12  -2   80.38   12.95
 -10 -12   2   72.90   11.44
  -9  12   2   46.20    8.34
   9  12  -2   57.58    7.76
   9 -12  -2   57.89   10.31
   9 -12  -2   64.83   10.24
  -9 -12   2   46.66    9.76
  -8  12   2  139.67   12.09
   8  12  -2  126.85   10.71
   8 -12  -2  131.52   12.79
   8 -12  -2  157.92   11.92
  -8 -12   2  143.68   12.84
   7  12  -2    1.58    7.00
  -7  12   2   -1.34    8.79
   7 -12  -2   -0.12    8.57
   7 -12  -2    1.65    8.08
  -7 -12   2    6.49    7.28
   6  12  -2    6.62    8.86
  -6  12   2    7.58    6.06
  -6 -12   2    5.56    4.85
   6 -12  -2   19.47   10.71
  -6 -12   2   14.18    8.70
   5  12  -2    9.79    9.58
  -5  12   2   17.17    8.75
   5 -12  -2    6.35    6.51
  -5 -12   2    7.93    5.13
   5 -12  -2   18.80   11.10
  -5 -12   2   20.89    9.48
   4  12  -2   60.96    9.16
  -4  12   2   67.71    9.46
  -4 -12   2   56.18    6.29
   4 -12  -2   60.08    9.98
  -4 -12   2   75.64   10.74
   3  12  -2    0.61    6.58
  -3  12   2   -0.34    9.30
  -3 -12   2   -1.88    4.63
   3 -12  -2   16.10   12.30
  -3 -12   2   -2.74    7.11
   2  12  -2   55.75    7.09
  -2  12   2   45.12    7.67
  -2 -12   2   45.22    5.82
   2 -12  -2   56.54   11.07
  -2 -12   2   37.71    8.08
   1  12  -2  189.38   12.53
  -1  12   2  226.32   13.99
  -1 -12   2  199.08   11.41
  -1 -12   2  177.42   12.64
   1 -12  -2  249.96   14.76
   0  12  -2  137.45   11.71
   0  12   2  131.61    9.93
   0 -12   2  146.94    9.64
   0 -12   2  133.19   11.71
   0 -12  -2  140.23   13.86
  -1  12  -2    9.02    8.19
   1  12   2   16.19    7.87
   1 -12   2   15.17    5.23
   1 -12   2   19.82    7.23
  -1 -12  -2   20.52   10.81
  -2  12  -2   -0.56    9.50
   2  12   2   -2.23    9.30
   2 -12   2    3.90    8.53
   2 -12   2    0.12    8.65
  -2 -12  -2   -4.76    7.50
  -3  12  -2  224.41   16.57
   3  12   2  209.99   14.20
   3 -12   2  211.18   15.44
   3 -12   2  215.59   17.46
  -3 -12  -2  241.32   17.37
  -4  12  -2  142.52   13.18
   4  12   2  134.58   11.22
   4 -12   2  143.63   10.85
   4 -12   2  133.61   13.37
  -4 -12  -2  131.80    9.94
  -5  12  -2   22.95    9.06
   5  12   2   16.28    8.67
   5 -12   2   14.10    8.96
   5 -12   2   40.51   12.16
  -5 -12  -2   14.85   10.43
  -6  12  -2   21.87    7.74
   6  12   2   12.27   10.08
   6 -12   2    1.39    9.83
   6 -12   2   -0.66   10.53
  -6 -12  -2   12.77    7.61
  -7  12  -2    3.63    7.54
   7  12   2    1.10    8.19
   7 -12   2   -1.99    8.00
   7 -12   2   -2.92   11.40
  -7 -12  -2    3.81    8.01
  -8  12  -2   99.48   10.58
   8  12   2  124.33    9.75
   8 -12   2  100.23    9.70
  -8 -12  -2  104.94   10.16
  -8  12  -2   58.17    8.58
  -9  12  -2   84.43   11.64
   9  12   2   80.40   11.51
   9 -12   2   87.31   14.06
  -9 -12  -2   78.81    9.98
  -9  12  -2   52.65    8.94
 -10  12  -2   23.27   13.28
  10  12   2   42.82    8.08
  10 -12   2   36.18    8.60
 -10 -12  -2   39.62    9.22
 -10  12  -2   52.26   12.44
  11  12   2    1.02    7.04
  11 -12   2   11.90    8.61
 -11 -12  -2   -6.77   10.85
 -11  12  -2    0.10    8.84
  12  12   2   44.88    9.69
  12 -12   2   54.04   14.16
 -12 -12  -2   49.67    9.56
 -12  12  -2   40.23   11.26
  13  12   2   -1.31   11.59
  13 -12   2   -3.94   11.53
 -13 -12  -2    2.38    7.44
 -13  12  -2   25.82   13.05
  14 -12   2   66.38   12.49
 -14 -12  -2   83.42   10.47
  14  13  -2   70.62   11.20
  14 -13  -2   54.77   13.01
 -14 -13   2   71.67   13.34
 -14  13   2   91.72   13.73
  13  13  -2   19.64    9.53
  13 -13  -2   14.36   14.98
 -13 -13   2   13.60    9.15
 -13  13   2   32.27   11.55
  12  13  -2   91.48   13.42
  12 -13  -2  106.28   12.78
 -12 -13   2  108.13   14.48
 -12  13   2   82.53   12.45
  11  13  -2    8.73    9.25
  11 -13  -2    1.79   10.55
 -11 -13   2    6.57    9.83
 -11  13   2    8.12   12.93
 -10  13   2   17.19    8.50
  10  13  -2   13.19   10.15
  10 -13  -2   19.04    9.24
  10 -13  -2   -1.91   10.30
 -10 -13   2   23.75    9.52
  -9  13   2   56.16   10.23
   9  13  -2   76.56    9.10
   9 -13  -2   48.42   11.66
   9 -13  -2   62.36   12.82
  -9 -13   2   62.47    9.79
  -8  13   2  181.05   14.93
   8  13  -2  230.66   13.66
   8 -13  -2  231.36   16.02
   8 -13  -2  236.20   17.67
  -8 -13   2  264.76   19.09
   7  13  -2   24.60    7.49
  -7  13   2   28.81    8.24
   7 -13  -2   35.94    9.43
   7 -13  -2   53.31    9.48
  -7 -13   2   44.35   12.36
   6  13  -2   19.03    8.98
  -6  13   2   14.05   10.82
   6 -13  -2   18.42    8.63
  -6 -13   2   31.27    8.66
   5  13  -2    5.07    8.85
  -5  13   2   10.94    9.78
   5 -13  -2   12.09    8.06
  -5 -13   2    4.66    9.74
   4  13  -2    0.03    7.98
  -4  13   2   11.29    8.30
   4 -13  -2   11.10    9.41
  -4 -13   2    8.53   10.29
   3  13  -2   67.15    8.36
  -3  13   2   83.76    9.90
   3 -13  -2   57.66   10.41
  -3 -13   2   72.11    9.80
   2  13  -2  104.06    8.33
  -2  13   2   86.74    9.44
  -2 -13   2   70.91    7.35
   2 -13  -2  102.08   11.96
  -2 -13   2   89.60   13.42
   1  13  -2   15.15    7.08
  -1  13   2   20.71    7.47
  -1 -13   2  139.50   46.53
  -1 -13   2    2.19    9.89
   1 -13  -2   13.50    9.95
   0  13  -2    0.45   10.60
   0  13   2    1.49    8.94
   0 -13   2   -2.80    9.09
   0 -13  -2   -8.04   10.23
  -1  13  -2  149.34   10.36
   1  13   2  146.04    9.38
   1 -13   2  149.89   10.61
   1 -13   2   97.05   11.32
  -1 -13  -2  159.73   11.36
  -2  13  -2   20.39    8.52
   2  13   2   17.47    6.27
   2 -13   2   16.87    8.43
   2 -13   2   16.95    9.17
  -2 -13  -2    9.62   11.18
  -3  13  -2   14.10    9.06
   3  13   2   25.89   10.03
   3 -13   2   15.31    7.85
   3 -13   2   12.99    7.88
  -3 -13  -2   21.96    9.45
  -4  13  -2    1.13    7.09
   4  13   2    2.96    6.39
   4 -13   2   -2.49    7.61
   4 -13   2    8.49   10.58
  -4 -13  -2   -4.94   13.31
  -5  13  -2   16.02   10.68
   5  13   2   13.14    7.17
   5 -13   2   16.16    7.81
   5 -13   2    6.11    9.90
  -5 -13  -2   25.99   10.42
  -6  13  -2   14.33   12.32
   6  13   2   12.65    7.85
   6 -13   2   18.77    9.32
   6 -13   2   15.59   11.42
  -6 -13  -2   17.08    8.05
  -7  13  -2    0.53    9.89
   7  13   2    7.96    7.11
   7 -13   2    1.74    9.25
   7 -13   2    1.75   10.94
  -7 -13  -2  -11.89   10.84
  -8  13  -2   15.96   12.17
   8  13   2   -7.03    9.11
   8 -13   2   14.85    7.66
  -8 -13  -2    4.55   10.77
  -8  13  -2  -11.15    7.83
  -9  13  -2    9.71    7.96
   9  13   2   24.26    8.62
   9 -13   2   26.78   11.22
  -9 -13  -2    5.85    9.16
  -9  13  -2    8.47    7.93
 -10  13  -2   -8.26   12.62
  10  13   2    9.75   12.62
  10 -13   2   -1.16    9.55
 -10 -13  -2    9.30   11.42
 -10  13  -2   -2.57   10.03
  11  13   2   76.54   11.05
  11 -13   2   74.28   12.13
 -11 -13  -2   82.15   10.87
 -11  13  -2   63.85   12.12
  12  13   2   12.39    7.82
  12 -13   2   -6.44   10.33
 -12 -13  -2   -1.99   11.78
  13  13   2    6.32   10.85
  13 -13   2    2.04   14.53
 -13 -13  -2   -4.65   10.66
  13  14  -2   41.62   11.44
 -13 -14   2   46.80   11.91
 -13  14   2   63.13   15.50
  12  14  -2  -11.14   11.26
 -12 -14   2   12.26   13.86
 -12  14   2   12.97   11.72
  11  14  -2   26.34    9.68
 -11 -14   2   16.02   11.08
 -11  14   2   21.84    9.97
 -10  14   2  251.74   17.33
  10  14  -2  267.31   20.03
  10 -14  -2  221.13   19.21
 -10 -14   2  233.49   20.45
  -9  14   2  158.12   12.92
   9  14  -2  192.65   12.92
   9 -14  -2  157.73   17.42
  -9 -14   2  172.31   16.69
  -8  14   2   69.69   12.02
   8  14  -2   59.70    9.58
   8 -14  -2   96.61   10.48
  -8 -14   2   60.20   12.74
   7  14  -2   21.63   12.12
  -7  14   2   19.60    6.98
   7 -14  -2   26.29    8.53
  -7 -14   2   31.20    9.98
   6  14  -2  164.11   14.52
  -6  14   2  139.35   12.72
   6 -14  -2  162.14   12.71
  -6 -14   2  177.67   15.78
   5  14  -2    1.27    9.02
  -5  14   2   13.17    9.53
   5 -14  -2    4.15   11.94
  -5 -14   2    8.63    7.39
   4  14  -2  170.27   14.40
  -4  14   2  171.00   13.70
   4 -14  -2  189.24   15.77
  -4 -14   2  196.29   14.21
   3  14  -2   15.10    8.23
  -3  14   2   14.32    9.53
   3 -14  -2   25.60    8.43
  -3 -14   2   11.52    9.44
   2  14  -2   68.59   10.17
  -2  14   2   88.37   10.34
   2 -14  -2   89.06   10.00
  -2 -14   2   74.71    9.13
   1  14  -2  909.67   20.60
  -1  14   2  934.40   20.20
  -1 -14   2  726.89   39.33
   1 -14  -2  771.79   34.14
   0  14  -2  518.44   24.53
   0  14   2  541.60   22.52
   0 -14   2  461.99   23.35
   0 -14  -2  562.05   27.64
  -1  14  -2  115.26    9.42
   1  14   2  120.01   10.73
   1 -14   2  126.98   10.98
   1 -14   2   98.85   12.28
  -1 -14  -2  131.67   12.32
  -2  14  -2   18.55   10.67
   2  14   2    4.46    9.79
   2 -14   2    4.35    8.62
   2 -14   2    9.40    9.29
  -2 -14  -2   -0.88   12.52
  -3  14  -2  264.63   16.76
   3  14   2  250.27   14.60
   3 -14   2  261.72   16.15
   3 -14   2  209.78   19.28
  -3 -14  -2  313.83   19.29
  -4  14  -2    2.54   11.42
   4  14   2   -2.56   10.01
   4 -14   2    0.24   10.11
   4 -14   2    7.26    9.54
  -4 -14  -2   -3.45   12.36
  -5  14  -2  431.14   21.10
   5  14   2  403.25   18.83
   5 -14   2  389.31   18.46
   5 -14   2  320.17   24.87
  -5 -14  -2  420.48   23.07
  -6  14  -2   57.03    9.85
   6  14   2   60.76   10.30
   6 -14   2   65.17   10.22
   6 -14   2   48.32   13.22
  -6 -14  -2   88.87   11.62
  -7  14  -2   17.01   11.58
   7  14   2   29.69   14.09
   7 -14   2   38.97    9.68
   7 -14   2    1.44   12.81
  -7 -14  -2   46.36   14.80
  -8  14  -2  321.26   21.14
   8  14   2  351.88   17.94
   8 -14   2  342.81   19.78
  -8 -14  -2  288.89   17.00
  -8  14  -2  292.86   17.76
  -9  14  -2  255.86   20.03
   9  14   2  248.65   15.26
   9 -14   2  224.35   17.07
  -9 -14  -2  290.14   20.03
  -9  14  -2  245.87   18.49
  10  14   2   -6.40   11.79
  10 -14   2    1.35   10.33
 -10 -14  -2   -1.35   15.03
  11  14   2   -4.26   11.83
  11 -14   2   -5.62   11.20
 -11 -14  -2   -8.78   11.85
  11  15  -2   -3.02   10.76
 -11 -15   2   24.61   11.76
 -11  15   2   -3.31    9.72
  10  15  -2    1.68    9.84
  10 -15  -2    0.43   11.93
 -10 -15   2   -1.09   10.92
  -9  15   2    3.70    9.53
   9  15  -2   11.96   11.16
   9 -15  -2    9.16   17.38
  -9 -15   2   -0.44   12.69
  -8  15   2   73.37   11.21
   8  15  -2   85.07   13.92
   8 -15  -2   52.65   13.25
  -8 -15   2   98.95   11.00
  -7  15   2   -1.14   11.11
   7  15  -2   -9.02   12.81
   7 -15  -2   12.90   14.74
  -7 -15   2   -5.34   11.00
   6  15  -2   17.35    8.71
  -6  15   2   12.04    9.52
   6 -15  -2   22.37    9.46
  -6 -15   2   19.08   11.62
   5  15  -2   22.68    8.28
  -5  15   2   17.13    8.24
   5 -15  -2    2.14   11.07
  -5 -15   2    4.92    8.79
   4  15  -2    2.77    9.67
  -4  15   2   -1.64    9.46
   4 -15  -2   -4.73   11.01
  -4 -15   2   -2.07   11.87
   3  15  -2   25.50    9.52
  -3  15   2   22.04    7.85
   3 -15  -2   31.87    8.61
  -3 -15   2   18.12   11.47
   2  15  -2    7.82   10.02
  -2  15   2   19.70   12.69
   2 -15  -2    3.04   11.21
  -2 -15   2   -0.02   10.68
   1  15  -2   15.31    9.04
  -1  15   2   31.56   10.13
   1 -15  -2   17.22    7.98
  -1 -15   2   31.87   12.31
   0  15  -2   12.03   13.51
   0  15   2    5.00    8.51
   0 -15   2   -3.94   12.11
   0 -15  -2   -7.31   10.82
  -1  15  -2  120.13   10.77
   1  15   2  105.81   10.23
   1 -15   2   88.24   10.95
  -1 -15  -2  105.71   10.28
  -2  15  -2   19.29   12.80
   2  15   2   10.27   10.24
   2 -15   2    7.89   10.01
  -2 -15  -2   12.15    9.51
  -3  15  -2   -1.93    7.40
   3  15   2   -1.57    7.05
   3 -15   2    1.01   10.99
  -3 -15  -2    1.87    9.17
  -4  15  -2   68.92   10.13
   4  15   2   61.87    8.52
   4 -15   2   51.65   13.02
  -4 -15  -2   66.95   11.93
  -5  15  -2   -6.63    8.35
   5  15   2    3.16   10.74
   5 -15   2   -4.74   10.24
  -5 -15  -2   11.00   13.04
  -6  15  -2    5.41   13.74
   6  15   2   10.20   10.60
   6 -15   2  -17.56   12.00
  -6 -15  -2    5.06   10.02
  -7  15  -2    4.34    9.38
   7  15   2   -1.54   13.41
   7 -15   2    4.81    9.11
   7 -15   2    3.14   14.62
  -7 -15  -2   14.99   14.27
  -8  15  -2    3.01   12.70
   8  15   2    9.35    9.77
   8 -15   2    7.88   11.27
  -8 -15  -2  -11.34   13.84
   9  15   2    0.14   12.11
  -9 -15  -2  -21.56   15.14
   9  16  -2   85.70   12.00
   9 -16  -2   60.78   14.65
  -9 -16   2  104.28   12.69
  -8  16   2   53.13   12.78
   8  16  -2   38.11    9.24
   8 -16  -2   32.39   14.89
  -8 -16   2   31.56   14.14
  -7  16   2    5.86   11.31
   7  16  -2   17.14    9.63
   7 -16  -2   16.23   12.39
  -7 -16   2    0.42   10.90
   6  16  -2   69.12   10.15
  -6  16   2   57.16    9.66
   6 -16  -2   47.15   15.65
  -6 -16   2   52.73   11.93
   5  16  -2    6.58    9.70
  -5  16   2    0.01    8.89
   5 -16  -2    7.92   15.68
  -5 -16   2    5.54   10.54
   4  16  -2  134.62   12.27
  -4  16   2  127.62   15.68
   4 -16  -2  169.19   16.19
  -4 -16   2  138.50   16.73
   3  16  -2   56.97   10.44
  -3  16   2   32.77    9.36
   3 -16  -2    0.90   14.91
  -3 -16   2   22.87   10.28
   2  16  -2   28.63   12.35
  -2  16   2   10.36   11.55
   2 -16  -2   16.28   11.27
  -2 -16   2   20.75   12.66
   1  16  -2  333.25   20.09
  -1  16   2  311.44   19.02
  -1 -16   2  277.08   22.74
   1 -16  -2  383.76   24.18
   0  16  -2  233.25   17.61
   0  16   2  182.45   14.88
   0 -16   2  199.27   18.32
   0 -16  -2  210.65   19.18
  -1  16  -2   65.96   10.05
   1  16   2   49.30   10.64
   1 -16   2   48.57   12.51
  -1 -16  -2   67.55   13.30
  -2  16  -2   -8.64   12.51
   2  16   2    3.31    9.18
   2 -16   2    8.09   12.50
  -2 -16  -2    7.83   13.11
  -3  16  -2  153.15   13.25
   3  16   2  131.74   12.51
   3 -16   2  105.39   15.67
  -3 -16  -2  128.52   16.03
  -4  16  -2    4.60   11.58
   4  16   2   -1.32    8.32
   4 -16   2   10.11   14.10
  -4 -16  -2    9.33   13.27
  -5  16  -2  174.76   12.95
   5  16   2  165.39   10.53
  -5 -16  -2  182.71   12.72
  -6  16  -2   42.47   11.24
   6  16   2   54.12   14.93
  -6 -16  -2   30.85   13.31
  -7  16  -2   22.52   13.90
   7  16   2   11.68   10.15
  -7 -16  -2   22.69   16.68
   5  17  -2   18.21   10.30
  -5  17   2    6.84   11.44
   5 -17  -2   -1.21   17.66
   4  17  -2   13.51   12.41
  -4  17   2   -8.27    9.94
   4 -17  -2    3.23   13.31
   3  17  -2    3.19    8.71
  -3  17   2    5.47    9.14
   3 -17  -2   -5.48   10.87
   2  17  -2   -0.01   10.09
  -2  17   2   19.64   13.04
   2 -17  -2  -15.03   12.25
   1  17  -2   21.57    8.58
  -1  17   2   12.68   15.49
   1 -17  -2    1.81   13.77
   0  17  -2   12.42   10.48
   0  17   2   -9.17   11.54
   0 -17  -2   18.79   14.58
  -1  17  -2    3.11   12.58
   1  17   2   -6.64   10.59
  -1 -17  -2   17.55   15.12
  -2  17  -2    1.46   13.15
   2  17   2   -2.57    9.64
  -2 -17  -2  -14.77   15.36
  -3  17  -2    6.12   11.75
   3  17   2  -13.96   10.56
  -3 -17  -2   15.27   12.90
  -4  17  -2   60.07   14.85
   4  17   2   54.51   13.56
  -4 -17  -2   35.47   16.55
  21   0  -3    3.68   14.14
 -21   0   3    1.64   10.21
  20   0  -3    2.62   12.85
 -20   0   3    4.66   10.01
  19   0  -3  -13.34   13.70
 -19   0   3    1.88    7.26
  18   0  -3   -6.54   13.54
 -18   0   3   -2.61   10.70
  17   0  -3   -7.22    8.51
 -17   0   3    3.62    7.19
  16   0  -3   -3.19   10.37
 -16   0   3    6.82    7.26
  15   0  -3   -1.57    6.04
 -15   0   3   -1.25    7.69
  14   0  -3    0.58    9.55
 -14   0   3   -5.76    7.82
  13   0  -3    0.32    8.93
 -13   0   3   -3.78    7.52
  12   0  -3    6.65    7.48
 -12   0   3   -8.72    6.87
  11   0  -3   -5.43    7.17
 -11   0   3    1.08    6.59
  10   0  -3   -0.22    6.59
 -10   0   3    1.20    5.15
   9   0  -3    2.20    6.45
  -9   0   3   -0.51    6.04
   7   0  -3    0.25    4.34
   7   0  -3   -5.64    5.56
  -7   0   3    0.82    4.81
   6   0  -3   -2.86    4.43
   6   0  -3    2.53    6.56
  -6   0   3   -0.50    5.11
   5   0  -3   -2.41    4.20
   5   0  -3    2.60    6.90
  -5   0   3   -1.61    4.92
   4   0  -3    5.84    4.82
   4   0  -3   -0.67    5.48
  -4   0   3    0.10    4.07
   3   0  -3   -1.61    5.57
   3   0  -3    0.56    5.97
   2   0  -3    6.51    6.24
   2   0  -3    1.22    5.60
   2   0  -3    0.90    4.71
   1   0  -3    4.36    6.25
  -1   0   3   -0.80    4.37
   1   0  -3    5.38    7.74
   0   0  -3    8.75    6.85
   0   0   3    9.38    4.53
   0   0  -3   -2.61    7.15
  -1   0  -3   -0.42    6.41
   1   0   3    1.09    4.65
  -1   0  -3   -0.42    3.54
  -2   0  -3   -0.84    6.80
   2   0   3   -1.12    4.92
  -2   0  -3    1.88    4.12
  -3   0  -3   11.92    6.22
   3   0   3    4.70    4.72
  -3   0  -3   16.31    5.31
  -4   0  -3   -0.57    5.92
   4   0   3    1.40    3.93
  -4   0  -3    4.53    4.34
  -5   0  -3   -3.44    5.23
   5   0   3    2.66    5.63
  -5   0  -3    1.44    4.60
  -6   0  -3    1.93    5.61
   6   0   3    8.25    5.97
  -6   0  -3    3.27    5.27
  -7   0  -3   -1.14    5.35
   7   0   3    3.43    5.08
  -7   0  -3    1.55    5.02
  -8   0  -3   -1.36    4.35
   8   0   3    3.28    6.65
  -8   0  -3   -1.48    6.12
  -9   0  -3    3.96    5.13
   9   0   3    4.95    5.44
  -9   0  -3    7.50    6.31
 -10   0  -3    1.19    5.57
  10   0   3   -3.25    5.33
 -10   0  -3    0.82    7.17
  11   0   3    1.55    4.05
  11   0   3   -0.45    8.30
 -11   0  -3    0.22    5.38
  12   0   3    5.32    4.68
  12   0   3   -2.39    6.53
 -12   0  -3    1.53    6.70
  13   0   3   -2.62    9.17
 -13   0  -3   -4.31    7.16
  14   0   3   -4.88    6.70
 -14   0  -3   -1.17    5.85
  15   0   3   -1.67    9.12
 -15   0  -3   -1.75    7.15
  16   0   3    3.19   10.13
 -16   0  -3   -3.09    9.55
  17   0   3    7.31   10.08
 -17   0  -3    5.46   10.59
  18   0   3    2.18   14.28
 -18   0  -3    5.02   10.22
  19   0   3   11.44   13.05
 -19   0  -3    1.94    9.44
  21   1  -3  -12.15   17.97
  21  -1  -3   21.03   13.10
 -21  -1   3   19.43   11.07
 -21   1   3    7.66   11.18
  20   1  -3    3.78   12.41
  20  -1  -3    0.93   11.49
 -20  -1   3    3.63    8.60
 -20   1   3   19.75   10.93
  19   1  -3   62.49   11.14
  19  -1  -3   51.64   12.92
 -19  -1   3  100.69   11.57
 -19   1   3   71.05    8.83
  18   1  -3    0.83    9.23
  18  -1  -3   13.60   13.53
 -18  -1   3   -7.18    8.02
 -18   1   3    5.53    7.42
  17   1  -3 1510.43   35.77
  17  -1  -3 1414.53   39.54
 -17  -1   3 1522.60   29.16
 -17   1   3 1444.08   35.26
  16   1  -3  436.44   16.95
  16  -1  -3  461.70   18.54
 -16  -1   3  453.74   15.71
 -16   1   3  446.03   15.95
  15   1  -3   79.98   11.36
  15  -1  -3   68.24   10.63
 -15  -1   3   91.88    9.35
 -15   1   3   85.28    8.59
  14   1  -3  562.77   20.04
  14  -1  -3  586.85   18.60
 -14  -1   3  578.97   17.39
 -14   1   3  543.71   16.99
  13   1  -3  458.94   20.37
  13  -1  -3  435.28   18.94
 -13  -1   3  465.07   17.89
 -13   1   3  457.71   17.58
  12   1  -3   64.94    6.92
  12  -1  -3   63.52    8.90
 -12  -1   3   51.69    6.19
 -12   1   3   59.16    7.88
  11   1  -3   95.20    9.53
  11  -1  -3   88.51    9.64
 -11  -1   3  107.36    8.72
 -11   1   3   94.48    7.20
  10   1  -3  123.65    7.44
  10   1  -3  147.86   10.18
  10  -1  -3  162.63   10.28
 -10  -1   3  154.81    8.10
 -10   1   3  146.57    8.45
   9   1  -3  286.86   10.86
   9   1  -3  350.67   14.37
   9  -1  -3  310.26   12.37
  -9  -1   3  311.64   11.55
  -9   1   3  314.28   10.41
   8   1  -3 5895.40   77.71
   8  -1  -3 5828.01   88.22
  -8  -1   3 5739.42   53.77
  -8   1   3 5325.79  104.25
   7  -1  -3  414.30   15.77
   7   1  -3  448.65   15.32
   7   1  -3  494.43   17.29
   7  -1  -3  442.77   15.55
  -7  -1   3  474.94   15.08
  -7   1   3  455.04   14.20
   6  -1  -3  951.38   25.11
   6   1  -3 1017.48   26.36
   6   1  -3 1149.97   29.99
   6  -1  -3 1073.34   28.78
  -6  -1   3 1074.90   25.69
  -6   1   3 1062.84   25.89
   5  -1  -3 1542.47   34.46
   5   1  -3 1593.89   36.30
   5   1  -3 1761.80   41.40
   5  -1  -3 1767.84   42.40
  -5  -1   3 1703.06   36.70
  -5   1   3 1703.48   35.82
   4  -1  -3 1012.40   26.96
   4   1  -3 1015.53   25.77
   4   1  -3 1049.70   27.31
   4  -1  -3 1157.85   30.55
   4  -1  -3 1091.71   28.22
  -4  -1   3 1078.38   25.87
   3  -1  -3  256.08   10.90
   3   1  -3  278.77   11.51
   3   1  -3  271.50   12.05
   3  -1  -3  299.21   12.75
   3  -1  -3  280.58   11.32
  -3  -1   3  267.08    9.43
   2  -1  -3  266.64   11.37
   2   1  -3  254.79   11.06
   2   1  -3  253.71   11.31
   2  -1  -3  254.59   11.20
   2  -1  -3  251.12   10.53
  -2  -1   3  231.45   10.89
   1  -1  -3    7.87    5.82
   1   1  -3    4.32    5.56
  -1  -1   3    6.49    4.05
  -1   1   3    4.78    4.18
   1  -1  -3    8.72    5.09
  -1  -1   3    2.86    3.61
   0  -1  -3 1632.90   37.40
   0   1  -3 1617.21   36.52
   0  -1   3 1524.24   33.49
   0   1   3 1483.41   34.54
   0  -1  -3 1600.10   35.67
   0   1  -3 1472.57   34.27
  -1  -1  -3 1874.13   42.14
  -1   1  -3 1878.54   41.15
   1   1   3 1898.91   40.24
   1  -1   3 1949.91   41.29
  -1  -1  -3 1751.26   38.49
  -1   1  -3 1873.03   41.57
  -2  -1  -3  221.23   10.20
  -2   1  -3  222.61   10.72
   2   1   3  222.80    9.26
   2  -1   3  222.94    9.87
  -2  -1  -3  224.66    9.45
  -2   1  -3  222.13    9.09
  -3  -1  -3  902.33   24.02
  -3   1  -3  941.93   25.91
   3   1   3  945.08   24.03
   3  -1   3  960.50   24.09
  -3  -1  -3  918.92   22.96
  -3   1  -3  941.89   23.60
  -4  -1  -3   56.04    6.31
  -4   1  -3   58.09    6.88
   4   1   3   60.25    6.30
   4  -1   3   59.69    5.61
  -4  -1  -3   56.00    6.01
  -4   1  -3   57.16    5.44
  -5  -1  -3    2.26    5.20
  -5   1  -3    3.81    5.69
   5   1   3    6.34    5.09
   5  -1   3    1.60    4.48
  -5  -1  -3   -4.58    5.90
  -5   1  -3    2.36    4.17
  -6  -1  -3  187.05   10.26
  -6   1  -3  194.83   10.18
   6   1   3  191.24    9.77
   6  -1   3  166.13    8.62
  -6  -1  -3  166.01    8.90
  -6   1  -3  174.16    8.70
  -7  -1  -3   20.61    6.75
  -7   1  -3   15.27    6.90
   7   1   3   22.68    6.14
   7  -1   3   18.40    7.19
  -7  -1  -3   18.43    5.17
  -7   1  -3   23.99    5.56
  -8  -1  -3  154.65    8.55
  -8   1  -3  164.67    9.40
   8   1   3  156.94    9.58
   8  -1   3  153.95    9.71
  -8  -1  -3  159.98    8.57
  -8   1  -3  161.13    9.17
  -9   1  -3 1630.73   45.92
   9   1   3 1602.65   43.05
   9   1   3 1546.80   43.16
   9  -1   3 1614.85   43.76
  -9  -1  -3 1619.46   42.98
  -9   1  -3 1423.64   39.55
 -10   1  -3  280.37   11.75
  10   1   3  266.85   10.39
  10   1   3  266.32   12.28
  10  -1   3  267.59   11.06
 -10  -1  -3  288.48   11.48
 -10   1  -3  291.94   11.49
 -11   1  -3  167.14    9.82
  11   1   3  123.61    7.27
  11   1   3  170.20   10.33
  11  -1   3  156.05    9.30
 -11  -1  -3  147.60   10.45
 -11   1  -3  153.76    9.35
  12   1   3   22.04    5.35
  12   1   3   15.62    8.34
  12  -1   3   21.19    9.96
 -12  -1  -3    9.30    8.44
 -12   1  -3   20.50    7.16
  13   1   3   49.80   11.23
  13  -1   3   42.72    8.85
 -13  -1  -3   33.83    7.11
 -13   1  -3   37.04    8.40
  14   1   3    4.43   10.83
  14  -1   3    1.96   12.15
 -14  -1  -3    9.87   10.03
 -14   1  -3    4.42    7.88
  15   1   3  426.17   21.28
  15  -1   3  393.91   19.23
 -15  -1  -3  417.49   19.45
 -15   1  -3  426.94   19.55
  16   1   3  278.20   18.03
  16  -1   3  295.60   16.22
 -16  -1  -3  284.26   13.85
 -16   1  -3  294.31   15.29
  17   1   3  -14.16   14.90
  17  -1   3   -0.68   12.26
 -17  -1  -3   12.33    9.72
 -17   1  -3    5.41   11.05
  18   1   3  311.69   24.44
  18  -1   3  343.47   21.65
 -18  -1  -3  322.37   18.36
 -18   1  -3  323.12   18.66
  19   1   3   36.26   20.32
  19  -1   3   30.59   15.88
 -19  -1  -3   40.93   13.87
 -19   1  -3   28.00   10.77
  21   2  -3    8.50   10.34
  21  -2  -3   10.76   11.47
 -21  -2   3   -7.68   11.94
 -21   2   3    4.04    9.19
  20   2  -3   14.07   10.86
  20  -2  -3   16.19   13.99
 -20  -2   3   11.59    9.45
 -20   2   3   12.74    9.38
  19   2  -3    5.32   13.74
  19  -2  -3    4.27   11.91
 -19  -2   3   -6.83    6.92
 -19   2   3   -0.94    7.76
  18   2  -3    3.30    9.40
  18  -2  -3   10.49   10.61
 -18  -2   3   -3.06    9.66
 -18   2   3    4.20    8.39
  17   2  -3    9.54   12.12
  17  -2  -3   15.68    8.65
 -17  -2   3   10.60    8.58
 -17   2   3   27.01   11.80
  16   2  -3    2.00    7.78
  16  -2  -3    9.24    8.50
 -16  -2   3   13.98    8.73
 -16   2   3    2.25   10.04
  15   2  -3    0.16    6.91
  15  -2  -3   -0.55    8.77
 -15  -2   3   -1.81    5.89
 -15   2   3    8.81    7.95
  14   2  -3    9.93    6.39
  14  -2  -3   25.36   10.84
 -14  -2   3    9.69    6.41
 -14   2   3   16.46    6.57
  13   2  -3   14.10    7.76
  13  -2  -3   12.19    5.93
 -13  -2   3   15.63    6.31
 -13   2   3   20.25    6.81
  12   2  -3   -6.66    7.91
  12  -2  -3   -2.38    8.91
 -12  -2   3    2.63    6.78
 -12   2   3    3.82    7.17
  11   2  -3   -0.47    4.04
  11   2  -3   -2.21    8.60
  11  -2  -3    0.18    7.86
 -11  -2   3   -4.36    6.81
 -11   2   3   -2.01    6.32
  10   2  -3   55.09    6.14
  10   2  -3   65.98    9.07
  10  -2  -3   64.47    8.81
 -10  -2   3   76.26    7.31
 -10   2   3   65.51    6.70
   9   2  -3    2.03    4.25
   9   2  -3    0.70    7.65
   9  -2  -3    3.78    7.52
  -9  -2   3    7.58    4.83
  -9   2   3   -0.02    6.85
   8   2  -3    3.13    4.26
   8   2  -3    3.55    6.09
  -8  -2   3    5.26    5.21
   7   2  -3   18.28    5.00
  -7   2   3   21.40    3.84
   7   2  -3   37.99    6.98
   7  -2  -3   28.51    6.82
  -7  -2   3   26.96    5.72
  -7   2   3   30.46    6.02
   6   2  -3   26.01    5.06
  -6   2   3   24.31    4.25
   6   2  -3   29.83    7.99
   6  -2  -3   28.91    6.58
  -6  -2   3   26.68    5.22
  -6   2   3   31.64    5.67
   5   2  -3    0.69    4.96
   5   2  -3   -2.41    6.41
   5  -2  -3    3.56    4.88
   5  -2  -3    8.84    6.50
  -5  -2   3    6.34    5.08
   4  -2  -3   11.81    5.69
   4   2  -3   13.92    5.52
   4   2  -3   11.15    5.86
   4  -2  -3   11.42    5.48
   4  -2  -3   12.44    7.20
  -4  -2   3   10.06    4.30
   3  -2  -3   55.08    6.76
   3   2  -3   46.90    6.82
   3   2  -3   52.38    7.81
   3  -2  -3   58.40    7.42
   3  -2  -3   60.87    7.82
  -3  -2   3   57.09    5.41
   2  -2  -3  174.65    9.72
   2   2  -3  172.17    9.53
   2  -2  -3  175.93    9.45
  -2  -2   3  175.63    8.12
   2  -2  -3  181.97   10.06
  -2  -2   3  160.78    8.28
   1  -2  -3  195.21    9.55
   1   2  -3  209.71   10.31
   1  -2  -3  196.31    9.48
  -1  -2   3  207.36    8.70
   1  -2  -3  208.73    9.95
   0  -2  -3  108.70    8.81
   0   2  -3  100.73    8.55
   0  -2   3  113.13    7.48
   0   2   3  102.09    6.13
   0  -2  -3  102.83    7.71
  -1  -2  -3   84.14    7.75
  -1   2  -3   78.05    8.31
   1   2   3   86.63    6.11
   1  -2   3   84.38    6.48
  -1  -2  -3   76.72    6.66
  -1   2  -3   87.56    7.61
  -2  -2  -3   10.40    6.17
  -2   2  -3   11.64    5.84
   2   2   3    9.63    4.10
   2  -2   3    9.95    5.85
  -2  -2  -3    5.82    5.38
  -2   2  -3   10.83    4.23
  -3  -2  -3  330.87   12.12
  -3   2  -3  315.73   12.04
   3   2   3  357.48   11.42
   3  -2   3  326.05   10.31
  -3  -2  -3  297.39   10.23
  -3   2  -3  341.38   10.82
  -4  -2  -3  264.08   11.00
  -4   2  -3  238.91   10.41
   4   2   3  256.09    9.61
   4  -2   3  265.57   10.50
  -4  -2  -3  253.64   10.34
  -4   2  -3  261.44    9.88
  -5  -2  -3    2.01    4.99
  -5   2  -3    2.99    4.46
   5   2   3    3.40    4.86
   5  -2   3    3.47    5.91
  -5  -2  -3    4.47    4.85
  -5   2  -3    4.06    4.60
  -6   2  -3  153.35    9.19
   6   2   3  145.22    7.65
   6   2   3  151.53    8.73
   6  -2   3  149.46    8.72
  -6  -2  -3  154.98    7.98
  -6   2  -3  160.94    8.74
  -7   2  -3  100.07    7.78
   7   2   3   83.63    6.36
   7   2   3   95.43    7.58
   7  -2   3   86.07    7.59
  -7  -2  -3  110.37    8.25
  -7   2  -3   98.47    7.08
  -8   2  -3   28.36    6.02
   8   2   3   25.51    4.83
   8   2   3   28.18    6.28
   8  -2   3   24.67    6.22
  -8  -2  -3   23.93    6.59
  -8   2  -3   28.06    6.34
  -9   2  -3  111.14    9.28
   9   2   3   96.27    6.88
   9   2   3  117.95    9.19
   9  -2   3  118.28    9.82
  -9  -2  -3  118.76    8.99
  -9   2  -3  122.50    8.38
 -10   2  -3    3.67    5.82
  10   2   3    3.73    5.13
  10   2   3    0.41    7.31
  10  -2   3    7.55    6.23
 -10  -2  -3    9.84    5.77
 -10   2  -3   -2.37    5.11
 -11   2  -3    6.62    5.85
  11   2   3    6.62    4.97
  11   2   3    8.54    7.55
  11  -2   3   -0.13    8.30
 -11  -2  -3    5.95    5.08
 -11   2  -3    3.61    6.56
 -12   2  -3   64.84    7.82
  12   2   3   60.68    6.16
  12   2   3   59.18   10.57
  12  -2   3   61.57   10.33
 -12  -2  -3   66.11    9.11
 -12   2  -3   63.09    8.53
  13   2   3   85.63    7.16
  13   2   3  102.56   10.48
  13  -2   3  107.01    8.77
 -13  -2  -3   85.48    7.69
 -13   2  -3   86.22   10.80
  14   2   3  120.80   13.36
  14  -2   3   97.79   11.86
 -14  -2  -3  106.74    9.62
 -14   2  -3  107.67    8.85
  15   2   3   -5.28   12.51
  15  -2   3   -0.12    7.98
 -15  -2  -3    8.63    9.74
 -15   2  -3   15.31    7.84
  16   2   3    0.81   10.64
  16  -2   3    4.18    9.25
 -16  -2  -3    1.05    6.59
 -16   2  -3  -12.83   10.19
  17   2   3   -1.84   11.41
  17  -2   3    9.85   11.39
 -17  -2  -3    4.29    8.38
 -17   2  -3    1.39    8.85
  18   2   3    0.30   13.10
  18  -2   3   -0.97   15.89
 -18  -2  -3    7.45   12.45
 -18   2  -3    8.89   10.44
  19   2   3    5.22   11.86
  19  -2   3   -5.95   16.73
 -19  -2  -3   -9.11   12.31
 -19   2  -3   14.81   13.75
  21   3  -3    9.83   14.41
  21  -3  -3    3.80   10.98
 -21  -3   3    4.15   11.39
 -21   3   3    4.08    9.89
  20   3  -3   61.16   13.43
  20  -3  -3   42.97   11.70
 -20  -3   3   39.15   10.88
 -20   3   3   46.72    8.14
  19   3  -3    0.53   10.02
  19  -3  -3    2.82    9.48
 -19  -3   3    6.42    9.36
 -19   3   3   10.45    7.30
  18   3  -3   19.08   10.83
  18  -3  -3   14.27   11.50
 -18  -3   3   15.20   10.79
 -18   3   3    9.44    7.96
  17   3  -3  635.20   29.38
  17  -3  -3  617.90   26.42
 -17  -3   3  665.09   26.98
 -17   3   3  722.32   30.03
  16   3  -3  143.20   12.10
  16  -3  -3  161.59   11.25
 -16  -3   3  154.55   11.72
 -16   3   3  157.20    9.82
  15   3  -3    2.65   10.00
  15  -3  -3   16.33    9.19
 -15  -3   3   17.01    9.05
 -15   3   3    8.61    9.12
  14   3  -3   92.31   10.97
  14  -3  -3   86.23   11.72
 -14  -3   3   96.56    8.14
 -14   3   3   93.22    8.45
  13   3  -3   21.85    8.15
  13  -3  -3   22.03    7.20
 -13  -3   3   18.92    5.76
 -13   3   3   12.07    7.44
  12   3  -3    3.62    4.88
  12   3  -3    1.90    8.68
  12  -3  -3    7.52    7.45
 -12  -3   3    1.85    6.35
 -12   3   3    2.36    7.18
  11   3  -3   55.81    6.53
  11   3  -3   59.24    7.36
  11  -3  -3   62.41    7.03
 -11  -3   3   47.43    6.80
 -11   3   3   63.63    6.50
  10   3  -3    1.10    5.13
  10   3  -3    5.40    7.09
  10  -3  -3   -6.62    6.40
 -10  -3   3    4.79    5.48
 -10   3   3   -1.10    5.79
   9   3  -3  223.83   10.16
   9   3  -3  248.59   12.56
   9  -3  -3  253.35   12.31
  -9   3   3  239.39   10.08
   8   3  -3 1926.06   45.43
   8  -3  -3 2089.97   50.26
  -8  -3   3 1933.51   46.10
  -8   3   3 2076.09   45.27
   7   3  -3  121.49    8.27
  -7   3   3  104.91    6.55
   7   3  -3  120.03    9.39
   7  -3  -3  133.47    9.88
  -7  -3   3  119.07    7.74
  -7   3   3  128.02    7.70
   6   3  -3  189.57    9.36
  -6   3   3  172.37    7.85
   6   3  -3  192.10    9.97
   6  -3  -3  186.68    9.94
   6  -3  -3  184.69    9.71
  -6  -3   3  187.18    8.55
   5   3  -3  111.19    7.06
  -5   3   3   96.75    6.32
   5   3  -3   98.64    7.61
   5  -3  -3  114.70    8.45
   5  -3  -3  103.26    8.52
  -5  -3   3   84.61    5.93
   4   3  -3   56.89    5.88
  -4   3   3   60.19    5.53
   4   3  -3   62.09    8.11
   4  -3  -3   57.46    7.32
   4  -3  -3   63.64    7.05
  -4  -3   3   60.97    6.03
   3   3  -3  428.66   15.10
  -3   3   3  405.94   13.47
   3  -3  -3  441.84   15.90
   3  -3  -3  427.08   15.68
  -3  -3   3  423.42   14.15
   2   3  -3    3.39    5.40
  -2   3   3   -0.24    4.84
   2  -3  -3   -0.41    4.99
  -2  -3   3    2.19    5.28
   2  -3  -3    1.59    6.90
  -2  -3   3   -0.73    5.60
   1   3  -3    1.94    6.78
  -1   3   3    1.27    5.59
   1  -3  -3    2.39    6.92
  -1  -3   3   -4.94    4.44
   1  -3  -3    4.85    5.79
  -1  -3   3   -0.99    5.00
   0   3  -3   81.56    7.35
   0   3   3   85.31    6.77
   0  -3   3   85.42    6.29
   0   3   3   62.72    6.30
   0  -3   3   47.12    7.91
   0  -3  -3   74.30    6.72
  -1   3  -3    6.29    6.22
   1   3   3    2.28    4.69
   1   3   3   -0.79    5.44
   1  -3   3    2.33    4.29
  -1  -3  -3    3.19    4.75
  -1   3  -3    1.31    5.52
  -2   3  -3  358.94   12.13
   2   3   3  362.77   11.28
   2  -3   3  372.35   12.94
  -2  -3  -3  351.84   11.44
  -2   3  -3  382.81   12.84
  -3   3  -3  695.46   20.61
   3   3   3  703.74   18.92
   3   3   3  589.60   22.96
   3  -3   3  723.34   19.47
  -3  -3  -3  634.16   18.23
  -3   3  -3  678.24   18.57
  -4   3  -3    8.78    5.31
   4   3   3    6.09    5.47
   4   3   3    7.60    3.67
   4  -3   3    5.24    6.35
  -4  -3  -3    9.87    5.27
  -4   3  -3   11.76    4.76
  -5   3  -3  147.13    9.07
   5   3   3  152.99    7.75
   5   3   3  152.17    8.51
   5  -3   3  137.98    7.80
  -5  -3  -3  144.58    7.94
  -5   3  -3  153.92    8.20
  -6   3  -3  135.87    9.66
   6   3   3  135.09    7.84
   6   3   3  142.44    8.14
   6  -3   3  151.23    8.28
  -6  -3  -3  144.47    8.20
  -6   3  -3  140.88    8.04
  -7   3  -3   76.28    7.11
   7   3   3   62.19    5.92
   7   3   3   69.61    6.85
   7  -3   3   74.62    7.00
  -7  -3  -3   78.62    7.63
  -7   3  -3   80.15    6.39
  -8   3  -3   82.39    7.66
   8   3   3   76.15    6.85
   8   3   3   99.16    7.97
   8  -3   3   74.68    7.71
  -8  -3  -3   78.73    6.84
  -8   3  -3   85.86    7.79
  -9   3  -3  802.00   25.50
   9   3   3  766.27   23.08
   9   3   3  835.26   26.34
   9  -3   3  851.25   26.48
  -9  -3  -3  841.47   24.89
  -9   3  -3  869.58   25.65
 -10   3  -3   28.33    6.71
  10   3   3   21.05    5.91
  10   3   3   34.05    7.87
  10  -3   3   31.97    6.48
 -10  -3  -3   38.56    8.58
 -10   3  -3   29.16    7.73
 -11   3  -3  121.42    9.67
  11   3   3  124.82    7.50
  11   3   3  119.75    9.90
  11  -3   3  128.71    8.61
 -11  -3  -3  129.03    9.17
 -11   3  -3  106.30    7.98
 -12   3  -3   39.57    7.70
  12   3   3   57.99    6.27
  12   3   3   54.09    9.45
  12  -3   3   61.00    9.25
 -12  -3  -3   60.34    7.58
 -12   3  -3   67.60    9.10
  13   3   3   82.76    7.32
  13   3   3   84.32   10.76
  13  -3   3   96.96   11.11
 -13  -3  -3  104.72   10.09
 -13   3  -3   86.86    8.15
  14   3   3    4.23    9.14
  14  -3   3   11.64    7.49
 -14  -3  -3    2.86    7.00
 -14   3  -3   -5.41   10.00
  15   3   3  246.95   15.18
  15  -3   3  224.84   16.92
 -15  -3  -3  247.26   13.77
 -15   3  -3  243.26   13.47
  16   3   3   36.29   11.92
  16  -3   3   46.42   13.92
 -16  -3  -3   49.20   12.83
 -16   3  -3   40.25    9.49
  17   3   3   24.14   13.72
  17  -3   3    6.89   13.04
 -17  -3  -3   18.82   10.76
 -17   3  -3   15.77    9.01
  18   3   3  232.03   16.23
  18  -3   3  242.07   15.93
 -18  -3  -3  231.42   16.15
 -18   3  -3  229.78   13.58
  21   4  -3   11.34   12.04
  21  -4  -3   -1.96   12.33
 -21  -4   3   -5.77    8.55
 -21   4   3    0.66    9.74
  20   4  -3   -0.19   18.75
  20  -4  -3   -4.83   10.35
 -20  -4   3   -0.76    7.69
 -20   4   3  -10.58   10.29
  19   4  -3   -5.73   11.23
  19  -4  -3    6.91   11.74
 -19  -4   3    1.34    8.66
 -19   4   3   -9.96    9.24
  18   4  -3   19.49    8.78
  18  -4  -3   26.35   12.75
 -18  -4   3   17.08   10.77
 -18   4   3   21.03    7.76
  17   4  -3   11.77   10.97
  17  -4  -3   10.48   13.80
 -17  -4   3    5.37    9.41
 -17   4   3   -0.88   11.34
  16   4  -3    7.58    9.30
  16  -4  -3    9.91   11.35
 -16  -4   3   -0.39    6.16
 -16   4   3   -1.36    6.43
  15   4  -3   13.36    8.14
  15  -4  -3    9.36   11.16
 -15  -4   3   11.31    6.95
 -15   4   3   19.15    8.76
  14   4  -3   29.76    8.77
  14  -4  -3   30.99    9.91
 -14  -4   3   44.25    8.73
 -14   4   3   44.93    8.71
  13   4  -3    1.80    5.48
  13   4  -3   -0.69    6.35
  13  -4  -3    7.96    6.56
 -13  -4   3   -6.30    7.01
 -13   4   3   -4.82    8.24
  12   4  -3   16.79    5.13
  12   4  -3   19.50    7.21
  12  -4  -3   13.89    8.92
 -12  -4   3   24.22    7.43
 -12   4   3   14.92    6.88
  11   4  -3   43.01    7.69
  11   4  -3   33.22   10.14
  11  -4  -3   39.14    9.18
 -11  -4   3   39.73    7.47
 -11   4   3   41.37    6.95
  10   4  -3   33.25    5.53
  10   4  -3   53.84    8.68
  10  -4  -3   63.95    8.15
 -10  -4   3   48.14    7.04
 -10   4   3   53.00    6.16
   9   4  -3    0.16    4.58
  -9   4   3   -1.05    3.68
   9   4  -3   -0.50    5.99
   9  -4  -3    8.78    6.28
  -9  -4   3    3.61    6.35
  -9   4   3   -1.16    6.24
   8   4  -3   15.01    5.49
  -8   4   3   11.78    4.67
   8   4  -3    7.74    5.75
   8  -4  -3   10.90    5.61
  -8  -4   3   15.82    6.08
  -8   4   3   16.67    6.97
   7   4  -3  343.12   12.64
  -7   4   3  292.83   12.07
   7   4  -3  323.72   12.80
   7  -4  -3  335.43   12.59
   7  -4  -3  328.96   12.31
  -7  -4   3  351.18   11.75
   6   4  -3  581.66   18.45
  -6   4   3  593.28   17.19
   6   4  -3  585.67   19.91
   6  -4  -3  568.02   19.19
   6  -4  -3  562.78   18.07
  -6  -4   3  601.05   17.81
   5   4  -3   23.96    4.83
  -5   4   3   19.18    3.53
   5   4  -3   20.58    7.44
   5  -4  -3   22.00    5.44
   5  -4  -3   25.62    6.16
  -5  -4   3   21.08    4.91
   4   4  -3   83.94    7.08
  -4   4   3   88.53    5.87
   4   4  -3   92.68    7.88
   4  -4  -3   86.35    7.40
   4  -4  -3   98.57    7.80
  -4  -4   3   84.16    6.64
   3   4  -3   44.96    6.71
  -3   4   3   44.50    5.31
   3  -4  -3   44.31    6.04
  -3  -4   3   42.47    5.59
   3  -4  -3   47.69    6.92
  -3  -4   3   41.36    5.12
   2   4  -3   80.62    6.61
  -2   4   3   80.62    5.92
   2  -4  -3   86.52    7.74
  -2  -4   3   84.22    6.61
   2  -4  -3   77.07    7.18
  -2  -4   3   67.79    6.01
   1   4  -3    2.00    5.07
  -1   4   3    4.91    4.76
   1  -4  -3   -2.35    6.31
  -1  -4   3    2.28    4.36
  -1  -4   3    1.62    4.40
   1  -4  -3   -0.31    5.31
   0   4  -3   53.60    6.82
   0   4   3   54.47    5.80
   0  -4   3   53.47    6.11
   0   4   3   36.44    4.36
   0  -4   3   38.91    5.88
   0  -4  -3   42.87    6.22
  -1   4  -3    1.97    4.42
   1   4   3    4.79    4.22
   1   4   3    2.83    3.12
   1  -4   3    2.26    4.61
   1  -4   3   -1.12    4.31
  -1  -4  -3    0.91    5.35
  -2   4  -3  216.90    9.75
   2   4   3  209.04    8.59
   2  -4   3  245.89    9.57
  -2  -4  -3  249.36   10.55
  -2   4  -3  200.84    8.45
  -3   4  -3   14.24    6.18
   3   4   3   14.85    5.63
   3   4   3   11.15    3.84
   3  -4   3   14.85    5.06
  -3  -4  -3   14.23    5.65
  -3   4  -3   15.99    3.91
  -4   4  -3   99.64    7.61
   4   4   3  109.95    7.04
   4   4   3  104.88    6.88
   4  -4   3  112.32    7.00
  -4  -4  -3  106.57    7.31
  -4   4  -3  111.46    7.53
  -5   4  -3   49.56    8.20
   5   4   3   50.53    5.39
   5   4   3   47.44    5.64
   5  -4   3   43.76    5.80
  -5  -4  -3   49.33    6.25
  -5   4  -3   49.19    5.48
  -6   4  -3   44.04    7.30
   6   4   3   57.51    6.27
   6   4   3   47.33    6.38
   6  -4   3   54.48    5.71
  -6  -4  -3   50.17    7.11
  -6   4  -3   48.66    5.75
  -7   4  -3   58.05    6.78
   7   4   3   60.06    5.33
   7   4   3   53.29    6.05
   7  -4   3   56.95    7.37
  -7  -4  -3   45.23    5.64
  -7   4  -3   63.95    6.80
  -8   4  -3  122.52    9.00
   8   4   3  139.02    8.71
   8   4   3  151.37    8.73
   8  -4   3  140.39    8.07
  -8  -4  -3  138.66    7.83
  -8   4  -3  133.89    8.66
  -9   4  -3   -3.34    6.35
   9   4   3   11.01    5.19
   9   4   3    3.32    6.90
   9  -4   3    7.87    7.20
  -9  -4  -3    6.16    6.75
  -9   4  -3   -1.61    6.50
 -10   4  -3   56.53    7.06
  10   4   3   52.81    6.38
  10   4   3   56.97    7.60
  10  -4   3   58.49    8.52
 -10  -4  -3   60.58    7.69
 -10   4  -3   74.24    7.78
 -11   4  -3    6.67    6.34
  11   4   3   14.18    5.93
  11   4   3    7.27    9.67
  11  -4   3   16.09    9.19
 -11  -4  -3   14.54    8.17
 -11   4  -3    8.46    6.68
  12   4   3  115.63    8.27
  12   4   3  101.08    9.96
  12  -4   3  104.58   10.47
 -12  -4  -3  117.53    8.74
 -12   4  -3  120.12    9.97
  13   4   3   -2.65   10.19
  13  -4   3    0.78    7.54
 -13  -4  -3    6.74   10.59
 -13   4  -3   -2.66    7.99
  14   4   3    2.08    9.64
  14  -4   3   -3.18   10.33
 -14  -4  -3   -7.19    9.17
 -14   4  -3   -3.58    9.44
  15   4   3    2.58   10.02
  15  -4   3    3.67    7.93
 -15  -4  -3    1.92   11.79
 -15   4  -3   -5.61    8.12
  16   4   3    4.07   10.46
  16  -4   3   24.02    9.54
 -16  -4  -3   10.61   12.46
 -16   4  -3   12.75    6.80
  17   4   3   55.87   14.84
  17  -4   3   55.11   11.78
 -17  -4  -3   42.59    9.02
 -17   4  -3   44.55   11.48
  18   4   3   -6.25   14.81
  18  -4   3   16.44   11.91
 -18  -4  -3   10.37   11.16
 -18   4  -3   10.59   10.16
  20   5  -3    0.96   14.05
  20  -5  -3   -5.11   12.68
 -20  -5   3   11.28   13.31
 -20   5   3    5.14   10.63
  19   5  -3    6.16   13.79
  19  -5  -3   11.18   14.25
 -19  -5   3   18.83    8.64
 -19   5   3   29.97    8.83
  18   5  -3   11.35    9.64
  18  -5  -3   15.12   12.16
 -18  -5   3    5.02    7.76
 -18   5   3    9.48   11.46
  17   5  -3  579.98   28.03
  17  -5  -3  626.37   31.10
 -17  -5   3  606.32   25.31
 -17   5   3  502.17   25.34
  16   5  -3  103.20   13.22
  16  -5  -3  109.99   11.29
 -16  -5   3  100.40    9.83
 -16   5   3   99.51   10.83
  15   5  -3    3.08    9.78
  15  -5  -3   14.49   10.69
 -15  -5   3   11.34    7.11
 -15   5   3   -1.64    9.62
  14   5  -3   71.62    7.84
  14   5  -3  102.43   11.92
  14  -5  -3  109.33   10.66
 -14  -5   3   90.77   10.08
 -14   5   3   88.15    9.87
  13   5  -3    9.40    6.02
  13   5  -3   11.47   10.24
  13  -5  -3   18.36    8.59
 -13  -5   3   11.49    7.33
 -13   5   3   12.11    7.63
  12   5  -3   14.07    6.63
  12   5  -3    7.36    9.38
  12  -5  -3   12.75    9.31
 -12  -5   3   11.23    6.27
 -12   5   3   10.63    5.50
  11   5  -3    7.36    6.29
  11   5  -3    4.37    8.09
  11  -5  -3   10.47    6.24
 -11  -5   3    8.62    7.30
 -11   5   3    9.56    6.43
  10   5  -3   55.15    7.93
 -10   5   3   39.47    6.09
  10   5  -3   77.07    9.07
  10  -5  -3   68.56    9.01
 -10  -5   3   67.16    7.50
 -10   5   3   69.85    6.79
   9   5  -3  264.58   11.54
  -9   5   3  182.72   12.86
   9   5  -3  249.78   12.46
   9  -5  -3  223.06   10.18
  -9  -5   3  269.23   10.79
  -9   5   3  249.66   10.76
   8   5  -3 1506.31   31.23
   8   5  -3 1537.53   31.46
   8  -5  -3 1522.39   32.18
   8  -5  -3 1560.06   32.42
  -8  -5   3 1620.65   28.60
   7   5  -3   71.52    6.82
  -7   5   3   67.38    5.89
   7   5  -3   86.32    8.83
   7  -5  -3   68.32    7.89
   7  -5  -3   73.17    8.09
  -7  -5   3   61.82    6.40
   6   5  -3  175.36    9.58
  -6   5   3  181.61    9.09
   6   5  -3  188.17   10.92
   6  -5  -3  177.77    9.89
   6  -5  -3  166.14    9.66
  -6  -5   3  157.15    8.84
   5   5  -3  116.95    8.38
  -5   5   3  121.59    7.19
   5   5  -3   97.77    8.20
   5  -5  -3  111.25    8.19
   5  -5  -3   97.09    8.89
  -5  -5   3  108.00    7.41
   4   5  -3  100.11    7.29
  -4   5   3  112.33    7.14
   4  -5  -3   96.90    7.81
  -4  -5   3  102.04    7.42
   4  -5  -3  101.40    9.00
  -4  -5   3   94.81    7.23
   3   5  -3   -0.91    5.23
  -3   5   3   -2.34    3.58
   3  -5  -3   -3.68    4.13
  -3  -5   3    6.31    4.86
   3  -5  -3    3.96    7.14
  -3  -5   3    1.27    3.82
   2   5  -3    9.42    5.06
  -2   5   3   15.56    5.35
   2  -5  -3   10.95    4.75
  -2  -5   3   12.72    5.06
   2  -5  -3   15.63    7.08
  -2  -5   3   10.32    4.15
   1   5  -3   66.18    7.34
  -1   5   3   58.23    5.53
  -1  -5   3   61.10    5.66
  -1  -5   3   49.19    6.32
   1  -5  -3   62.17    7.55
   0   5  -3  742.23   20.56
   0   5   3  726.11   19.61
   0  -5   3  700.95   19.45
   0  -5   3  676.37   24.53
   0  -5  -3  712.16   20.97
  -1   5  -3  826.11   23.00
   1   5   3  845.10   21.85
   1  -5   3  775.85   20.50
  -1  -5  -3  827.93   22.59
  -2   5  -3   29.17    7.31
   2   5   3   30.93    5.13
   2  -5   3   29.68    5.47
   2  -5   3   21.20    5.27
  -2  -5  -3   26.23    6.02
  -3   5  -3  212.75   10.67
   3   5   3  224.89    8.77
   3  -5   3  233.51    9.39
  -3  -5  -3  232.87   10.00
  -3   5  -3  238.25    9.79
  -4   5  -3   33.22    7.54
   4   5   3   35.84    6.15
   4   5   3   25.11    5.02
   4  -5   3   27.05    6.06
  -4  -5  -3   27.75    5.93
  -4   5  -3   30.01    5.59
  -5   5  -3   18.37    5.45
   5   5   3   14.95    4.80
   5   5   3   11.51    5.04
   5  -5   3   25.04    7.32
  -5  -5  -3   11.07    6.26
  -5   5  -3   10.55    3.94
  -6   5  -3   24.28    5.88
   6   5   3   24.29    5.69
   6   5   3   28.45    5.66
   6  -5   3   34.54    6.26
  -6  -5  -3   39.66    7.30
  -6   5  -3   31.22    5.36
  -7   5  -3   67.25    7.33
   7   5   3   54.85    6.03
   7   5   3   86.90    7.52
   7  -5   3   61.72    7.36
  -7  -5  -3   74.57    8.23
  -7   5  -3   56.27    6.89
  -8   5  -3   48.34    6.96
   8   5   3   35.03    6.59
   8   5   3   38.87    7.16
   8  -5   3   36.83    5.97
  -8  -5  -3   37.89    7.41
  -8   5  -3   40.52    6.21
  -9   5  -3  620.32   22.76
   9   5   3  651.62   22.84
   9   5   3  669.09   23.69
   9  -5   3  623.49   21.85
  -9  -5  -3  566.05   19.35
  -9   5  -3  595.70   21.76
 -10   5  -3  194.33   10.57
  10   5   3  193.69    8.74
  10   5   3  216.12   11.72
  10  -5   3  199.46   11.50
 -10  -5  -3  234.29   12.04
 -10   5  -3  241.11   11.45
 -11   5  -3   92.94    8.86
  11   5   3   82.18    7.34
  11   5   3   85.86    9.77
  11  -5   3   97.39   10.33
 -11  -5  -3   98.19    9.83
 -11   5  -3   94.22    7.52
  12   5   3  134.35    8.74
  12   5   3  109.38   11.10
  12  -5   3  147.25   11.87
 -12  -5  -3  139.46   10.85
 -12   5  -3  150.11    9.55
  13   5   3   22.24    7.76
  13   5   3   16.09    8.19
  13  -5   3   21.24    6.66
 -13  -5  -3   10.79    7.66
 -13   5  -3   21.23    7.42
  14   5   3   14.01    6.03
  14   5   3   20.22    9.96
  14  -5   3   17.54   10.90
 -14  -5  -3   20.00    7.02
 -14   5  -3   23.90   10.84
  15   5   3  190.31   13.38
  15  -5   3  183.79   12.49
 -15  -5  -3  219.30   12.59
 -15   5  -3  224.15   14.74
  16   5   3   61.29   11.50
  16  -5   3   55.76   11.68
 -16  -5  -3   93.83    9.33
 -16   5  -3   71.58   10.41
  17   5   3   27.93   14.00
  17  -5   3   36.17   12.96
 -17  -5  -3   36.99    9.97
 -17   5  -3   32.54   11.45
  18  -5   3  166.31   15.84
 -18  -5  -3  168.91   15.37
 -18   5  -3  181.37   12.03
  20   6  -3    5.41   11.64
  20  -6  -3   14.20   14.46
 -20  -6   3    4.10   12.61
 -20   6   3    1.14   11.00
  19   6  -3    4.49   13.48
  19  -6  -3   13.27   14.34
 -19  -6   3    5.95   12.10
 -19   6   3    9.39   12.46
  18   6  -3  -10.14   13.62
  18  -6  -3   -8.28   14.61
 -18  -6   3    4.10    8.14
 -18   6   3   24.38    8.30
  17   6  -3   16.30    8.65
  17  -6  -3   30.56   14.76
 -17  -6   3   12.67   10.06
 -17   6   3    4.71   10.89
  16   6  -3  -10.56   12.33
  16  -6  -3   -4.69    7.66
 -16  -6   3   -1.30    9.15
 -16   6   3    8.78   10.61
  15   6  -3   11.53    9.04
  15  -6  -3   -4.53    8.57
 -15  -6   3   -3.38   10.01
 -15   6   3   -4.48    8.57
  14   6  -3  116.60   10.47
  14   6  -3  142.94   12.09
  14  -6  -3  134.35   10.28
 -14  -6   3  146.57   10.68
 -14   6   3  125.44   11.21
  13   6  -3    3.45    6.17
  13   6  -3   -1.38    7.53
  13  -6  -3   -5.23    8.00
 -13   6   3    3.01    7.50
  12   6  -3    3.48    6.46
  12   6  -3   19.12    9.17
  12  -6  -3    3.32    7.96
 -12  -6   3    8.98    7.33
 -12   6   3    5.60    6.06
  11   6  -3  135.39    9.32
  11   6  -3  113.86   11.97
  11  -6  -3  149.09   10.32
 -11  -6   3  126.65    8.83
 -11   6   3  114.06    7.73
  10   6  -3  270.85   11.84
  10   6  -3  281.17   12.69
  10  -6  -3  272.23   12.78
 -10  -6   3  276.79   11.01
 -10   6   3  248.64   10.74
   9   6  -3  414.73   17.04
  -9   6   3  312.54   22.36
   9   6  -3  398.40   16.93
   9  -6  -3  396.66   16.94
  -9  -6   3  425.35   15.88
   8   6  -3   47.88    7.27
  -8   6   3   42.21    5.84
   8   6  -3   55.99    7.43
   8  -6  -3   54.28    7.71
   8  -6  -3   48.70    8.46
  -8  -6   3   44.63    5.89
   7   6  -3  262.44   11.12
  -7   6   3  247.49   10.18
   7   6  -3  259.80   12.25
   7  -6  -3  252.05   11.36
   7  -6  -3  254.84   11.49
  -7  -6   3  222.27   10.63
   6   6  -3  242.79   10.89
  -6   6   3  235.31   10.21
   6   6  -3  247.62   11.49
   6  -6  -3  219.13   10.64
   6  -6  -3  222.09   11.11
  -6  -6   3  232.96    9.98
   5   6  -3  213.25   10.30
  -5   6   3  238.42   10.05
   5  -6  -3  212.08    9.96
  -5  -6   3  221.13    9.54
   5  -6  -3  217.22   10.80
  -5  -6   3  197.46    9.98
   4   6  -3    3.69    4.37
  -4   6   3   -1.41    5.23
   4  -6  -3   -0.05    4.66
  -4  -6   3    3.27    5.67
   4  -6  -3    4.37    6.51
  -4  -6   3    6.51    5.32
   3   6  -3  856.40   23.79
  -3   6   3  894.03   23.23
   3  -6  -3  819.11   23.76
  -3  -6   3  847.28   24.94
   3  -6  -3  901.83   24.71
  -3  -6   3  834.09   29.38
   2   6  -3  100.75    7.92
  -2   6   3  102.85    7.86
   2  -6  -3  104.94    7.53
  -2  -6   3  113.20    7.74
   2  -6  -3  111.47    8.88
  -2  -6   3   99.58    7.05
   1   6  -3 1100.93   28.07
  -1   6   3 1060.36   28.17
  -1  -6   3 1091.99   27.70
  -1  -6   3 1154.67   29.57
   1  -6  -3 1083.49   28.71
   0   6  -3  239.73   10.36
   0   6   3  251.14    9.40
   0  -6   3  254.53    9.89
   0  -6   3  231.73   13.16
   0  -6  -3  256.17   10.92
  -1   6  -3  251.68   10.15
   1   6   3  261.88    9.79
   1  -6   3  279.29   10.40
   1  -6   3  251.74   11.90
  -1  -6  -3  242.72   10.31
  -2   6  -3   47.69    6.27
   2   6   3   59.02    6.38
   2  -6   3   56.81    6.16
   2  -6   3   33.18    6.36
  -2  -6  -3   60.14    7.15
  -3   6  -3  835.06   20.66
   3   6   3  853.46   19.35
   3  -6   3  830.47   18.07
  -3  -6  -3  842.34   19.29
   4  -6   3  336.08   11.83
  -5   6  -3   68.55    7.40
   5   6   3   69.14    6.30
   5   6   3   33.75    5.95
   5  -6   3   67.45    7.84
  -5  -6  -3   62.38    7.08
  -5   6  -3   37.87    5.26
  -6   6  -3   63.72    7.29
   6   6   3   60.16    5.82
   6   6   3   46.55    6.67
   6  -6   3   57.96    6.14
  -6  -6  -3   52.56    5.91
  -6   6  -3   57.33    6.61
  -7   6  -3  228.45   11.39
   7   6   3  212.34    8.68
   7   6   3  224.09   11.77
   7  -6   3  228.06    9.64
  -7  -6  -3  209.74    9.98
  -7   6  -3  184.42   11.55
  -8   6  -3  654.91   23.74
   8   6   3  723.82   21.46
   8   6   3  680.66   24.82
   8  -6   3  746.61   23.07
  -8  -6  -3  663.08   21.23
  -8   6  -3  768.65   23.42
  -9   6  -3  313.42   14.24
   9   6   3  311.17   13.47
   9   6   3  286.07   15.18
   9  -6   3  302.08   13.54
  -9  -6  -3  326.38   13.59
 -10   6  -3  185.87   11.28
  10   6   3  177.06    9.31
  10   6   3  173.60   11.89
  10  -6   3  186.72   10.21
 -10  -6  -3  190.05   11.72
 -10   6  -3  206.26   10.08
 -11   6  -3   23.74    7.29
  11   6   3   33.94    7.40
  11   6   3   36.39    9.05
  11  -6   3   18.12    6.28
 -11  -6  -3   27.52    9.52
 -11   6  -3   32.64    7.83
  12   6   3  253.71   12.33
  12   6   3  211.44   13.17
  12  -6   3  276.02   14.62
 -12  -6  -3  263.90   14.34
 -12   6  -3  237.44   11.87
  13   6   3   46.70    8.32
  13   6   3   48.32    8.50
  13  -6   3   51.06    8.72
 -13  -6  -3   58.46    8.52
 -13   6  -3   65.97    8.67
  14   6   3  185.65   12.72
  14   6   3  181.80   14.42
  14  -6   3  195.31   15.17
 -14  -6  -3  231.29   16.96
 -14   6  -3  208.97   14.93
  15   6   3   -6.35   10.27
  15  -6   3   -1.60    8.50
 -15  -6  -3   11.20    9.43
 -15   6  -3    8.51    9.36
  16   6   3   17.35   12.50
  16  -6   3    4.60   11.61
 -16  -6  -3   29.02   10.72
 -16   6  -3   23.11    9.37
  17  -6   3  110.13   12.68
 -17  -6  -3  120.73   13.01
 -17   6  -3   98.89   10.54
 -20  -7   3    3.90   12.79
 -20   7   3   -2.45    9.89
  19   7  -3   20.56   14.34
  19  -7  -3   28.30   14.24
 -19  -7   3   10.87   11.98
 -19   7   3   15.10   13.53
  18   7  -3   88.83   13.27
  18  -7  -3   89.09   19.05
 -18  -7   3   62.02    9.72
 -18   7   3   72.20    9.63
  17   7  -3  407.35   22.42
  17  -7  -3  480.39   27.50
 -17  -7   3  454.24   23.33
 -17   7   3  452.15   22.90
  16   7  -3   59.29   12.61
  16  -7  -3   52.23   11.81
 -16  -7   3   42.52    9.04
 -16   7   3   34.99   11.29
  15   7  -3   62.01    9.40
  15   7  -3   56.74   10.62
  15  -7  -3   67.18   10.98
 -15  -7   3   68.74    8.53
 -15   7   3   58.33    9.67
  14   7  -3  195.36   13.86
  14   7  -3  233.52   14.88
  14  -7  -3  276.92   13.38
 -14  -7   3  261.01   12.58
 -14   7   3  243.36   11.49
  13   7  -3  182.13   14.53
  13   7  -3  192.43   16.23
  13  -7  -3  226.41   16.14
 -13  -7   3  186.28   13.46
 -13   7   3  146.45    9.07
  12   7  -3   22.04    9.13
  12   7  -3   25.90    9.35
  12  -7  -3   11.41    7.83
 -12  -7   3   19.20    5.88
 -12   7   3   12.38    6.69
 -11   7   3    7.29    5.15
  11   7  -3   13.37    6.96
  11   7  -3   13.43    8.36
  11  -7  -3   27.26    9.58
 -11  -7   3   17.21    7.10
 -11   7   3   18.36    7.89
  10   7  -3    5.54    6.18
 -10   7   3    1.31    5.72
  10   7  -3    8.01    9.85
  10  -7  -3    1.85    9.17
 -10  -7   3    2.25    6.52
 -10   7   3    5.20    6.52
   9   7  -3  788.85   24.54
  -9   7   3  773.18   30.06
   9   7  -3  878.07   26.92
   9  -7  -3  726.42   24.06
  -9  -7   3  849.43   25.46
   8   7  -3  981.57   29.97
  -8   7   3 1021.11   32.91
   8   7  -3 1108.70   33.22
   8  -7  -3 1077.65   34.69
   8  -7  -3 1106.60   32.92
  -8  -7   3 1177.37   33.16
   7   7  -3   44.59    6.74
  -7   7   3   46.62    6.32
   7   7  -3   41.50    8.24
   7  -7  -3   42.02    7.50
   7  -7  -3   54.51    9.20
  -7  -7   3   46.97    6.64
   6   7  -3  686.27   19.02
  -6   7   3  713.73   17.82
   6  -7  -3  593.89   19.91
  -6  -7   3  714.79   19.45
   6  -7  -3  671.02   19.75
  -6  -7   3  672.49   16.95
   5   7  -3  740.85   20.28
  -5   7   3  737.23   19.91
   5  -7  -3  698.79   19.60
  -5  -7   3  729.22   19.58
   5  -7  -3  782.69   20.94
  -5  -7   3  752.54   24.58
   4   7  -3  289.02   11.87
  -4   7   3  273.10   11.03
   4  -7  -3  265.80   11.36
  -4  -7   3  263.90   10.92
   4  -7  -3  314.98   13.30
  -4  -7   3  240.94   13.48
   3   7  -3  222.83   10.11
  -3   7   3  217.33    9.77
   3  -7  -3  208.97    9.96
  -3  -7   3  196.32    8.75
   3  -7  -3  238.84   11.59
  -3  -7   3  217.11   10.15
   2   7  -3   59.99    7.72
  -2   7   3   41.00    6.49
   2  -7  -3   45.94    5.79
  -2  -7   3   45.11    5.39
   2  -7  -3   43.34    7.78
  -2  -7   3   47.67    6.43
   1   7  -3    5.93    6.56
  -1   7   3    3.76    4.84
  -1  -7   3    6.53    4.19
  -1  -7   3    5.02    4.72
   1  -7  -3    4.41    6.66
   0   7  -3 1094.20   21.78
   0   7   3 1147.38   22.98
   0  -7   3 1163.26   25.84
   0  -7   3 1151.15   37.11
   0  -7  -3 1066.03   24.07
  -1   7  -3 1136.76   24.63
   1   7   3 1165.28   23.42
   1  -7   3 1213.43   24.51
   1  -7   3 1133.85   28.64
  -1  -7  -3 1230.64   25.26
  -2   7  -3   12.12    6.19
   2   7   3    7.91    5.64
   2  -7   3   21.84    6.48
   2  -7   3   13.61    5.65
  -2  -7  -3   18.04    6.48
  -3   7  -3  395.18   14.07
   3   7   3  384.51   12.66
   3  -7   3  409.40   12.85
  -3  -7  -3  392.91   13.82
  -4   7  -3  336.93   12.31
   4   7   3  348.06   11.86
   4  -7   3  373.07   12.41
  -4  -7  -3  386.61   15.29
  -5   7  -3   16.11    6.50
   5   7   3   17.50    6.58
   5  -7   3   22.10    6.17
  -5  -7  -3   18.94    6.89
  -5   7  -3   10.73    5.36
  -6   7  -3  310.49   13.21
   6   7   3  308.41   13.02
   6  -7   3  299.53   12.83
  -6  -7  -3  269.79   10.62
  -6   7  -3  298.55   12.84
  -7   7  -3    6.63    6.25
   7   7   3   12.53    4.54
   7   7   3    8.59    4.84
   7  -7   3   15.12    7.33
  -7  -7  -3    9.41    6.69
  -7   7  -3    5.99    5.53
  -8   7  -3   13.76    6.61
   8   7   3    5.71    5.09
   8   7   3    8.45    5.52
   8  -7   3    7.97    7.47
  -8  -7  -3    8.65    5.10
  -8   7  -3   10.26    6.11
  -9   7  -3  794.34   23.90
   9   7   3  881.61   22.24
   9  -7   3  885.99   24.61
  -9  -7  -3  805.86   20.26
  -9   7  -3  867.88   24.89
 -10   7  -3   67.21    9.82
  10   7   3   79.56    8.15
  10   7   3   63.53    8.38
  10  -7   3   70.69    8.84
 -10  -7  -3   73.54    8.87
 -10   7  -3   86.03    8.36
 -11   7  -3    7.15    7.66
  11   7   3   -2.30    5.09
  11   7   3   -3.62    6.85
  11  -7   3   -1.65    8.80
 -11  -7  -3    4.00    7.97
 -11   7  -3   -1.38    7.39
  12   7   3    2.87    7.32
  12   7   3    0.14    8.26
  12  -7   3    6.31    7.67
 -12  -7  -3   -3.65    8.12
 -12   7  -3   -0.04    6.48
  13   7   3   95.52    9.25
  13   7   3   61.83   10.24
  13  -7   3   78.46   12.95
 -13  -7  -3   92.01   11.90
 -13   7  -3  100.42   11.22
  14   7   3   -1.49    9.54
  14  -7   3    6.53    7.35
 -14  -7  -3    4.26    7.53
 -14   7  -3    3.47    6.37
  15  -7   3   40.02   11.01
 -15  -7  -3   44.16    9.57
 -15   7  -3   56.96    9.62
  16  -7   3   31.83    9.56
 -16  -7  -3   48.60    9.94
 -16   7  -3   53.08   12.07
  17  -7   3   -0.81    9.83
 -17  -7  -3  -10.37   11.59
 -17   7  -3  -14.41   11.41
  19   8  -3   14.02   14.66
  19  -8  -3   -7.49   13.74
 -19  -8   3    2.80    9.24
 -19   8   3   -5.41   12.14
  18   8  -3   29.42   12.70
  18  -8  -3   56.20   10.83
 -18  -8   3   38.50    9.42
 -18   8   3   37.13   11.07
  17   8  -3    9.20   11.86
  17  -8  -3    4.94    9.82
 -17  -8   3   15.96    9.77
 -17   8   3    7.46   12.36
  16   8  -3    1.06    8.66
  16  -8  -3   -7.68   13.37
 -16  -8   3    2.00    8.20
 -16   8   3   -6.00   11.80
  15   8  -3   -3.11    9.46
  15   8  -3   20.29    7.61
  15  -8  -3   18.77   11.20
 -15  -8   3   26.39   10.07
 -15   8   3   12.07   10.04
  14   8  -3   27.13    9.55
  14   8  -3   25.33   10.28
  14  -8  -3   23.28   10.72
 -14  -8   3   30.03    7.04
 -14   8   3   33.08    7.87
  13   8  -3    1.67    6.64
  13   8  -3    0.80   11.10
  13  -8  -3   13.09   12.93
 -13  -8   3    8.25    6.14
 -13   8   3    2.72    9.70
  12   8  -3    4.44    5.79
  12   8  -3    9.89    7.22
  12  -8  -3    1.20    9.41
 -12  -8   3    2.99    7.72
 -12   8   3    3.32    6.95
  11   8  -3  163.89   10.18
  11   8  -3  159.58   11.40
  11  -8  -3  171.52   13.40
 -11  -8   3  163.16   10.84
 -11   8   3  165.77   11.63
  10   8  -3  219.80   11.52
 -10   8   3  158.30   11.71
  10   8  -3  199.73   12.88
  10  -8  -3  221.91   12.43
  10  -8  -3  212.85   12.06
 -10  -8   3  213.13   11.98
   9   8  -3    4.67    7.92
  -9   8   3    1.21    6.01
   9   8  -3    1.47    8.22
   9  -8  -3    1.40    5.38
   9  -8  -3  -13.84    9.37
  -9  -8   3    0.10    5.63
   8   8  -3   12.14    7.05
  -8   8   3   16.69    5.37
   8   8  -3   12.30    7.67
   8  -8  -3   13.90    6.24
   8  -8  -3   10.81    6.71
  -8  -8   3   19.01    5.88
   7   8  -3  651.88   23.07
  -7   8   3  690.50   23.44
   7  -8  -3  560.45   20.40
  -7  -8   3  649.00   24.44
   7  -8  -3  673.27   23.52
  -7  -8   3  713.92   22.33
   6   8  -3  826.01   26.55
  -6   8   3  845.45   26.49
   6  -8  -3  795.53   26.23
  -6  -8   3  847.65   28.78
   6  -8  -3  842.50   27.04
  -6  -8   3  758.68   25.04
   5   8  -3  628.17   20.82
  -5   8   3  642.22   20.32
  -5  -8   3  625.73   22.76
   5  -8  -3  666.94   24.41
  -5  -8   3  610.30   23.29
   4   8  -3  258.38   11.49
  -4   8   3  250.92   10.36
   4  -8  -3  260.11   11.46
  -4  -8   3  265.95   10.92
   4  -8  -3  253.44   11.31
  -4  -8   3  258.37   11.39
   3   8  -3  336.57   12.24
  -3   8   3  316.40   10.58
   3  -8  -3  288.55   11.36
  -3  -8   3  341.87   12.05
   3  -8  -3  325.45   13.80
  -3  -8   3  299.60   12.43
   2   8  -3  226.87   11.75
  -2   8   3  218.62    9.38
   2  -8  -3  180.10    8.98
  -2  -8   3  194.07    9.59
   2  -8  -3  214.86   11.85
  -2  -8   3  191.03    9.70
   1   8  -3  813.60   21.27
  -1   8   3  851.11   20.73
  -1  -8   3  812.13   20.99
  -1  -8   3  838.64   21.69
   1  -8  -3  870.90   21.31
   0   8  -3  724.62   19.71
   0   8   3  692.40   18.49
   0  -8   3  706.93   19.43
   0  -8   3  728.23   27.02
   0  -8  -3  720.47   19.31
  -1   8  -3  158.82    9.96
   1   8   3  165.88    9.38
   1  -8   3  147.09    8.23
   1  -8   3  154.68    9.81
  -1  -8  -3  152.73    9.13
  -2   8  -3  258.54   10.93
   2   8   3  301.20   10.40
   2  -8   3  275.51   10.88
   2  -8   3  237.36   13.59
  -2  -8  -3  296.63   12.04
  -3   8  -3  226.20   11.21
   3   8   3  264.09   11.21
   3  -8   3  244.35   10.77
   3  -8   3  208.38   12.14
  -3  -8  -3  253.16   11.85
  -4   8  -3 1538.19   42.45
   4   8   3 1508.08   40.59
   4  -8   3 1495.50   41.52
   4  -8   3 1403.17   45.63
  -4  -8  -3 1632.49   42.17
  -5   8  -3  300.32   13.09
   5   8   3  298.57   12.00
   5  -8   3  311.76   13.34
  -5  -8  -3  293.60   11.14
  -5   8  -3  270.95   13.49
  -6   8  -3   43.55    9.61
   6   8   3   66.06    6.70
   6  -8   3   62.99    9.03
  -6  -8  -3   60.92    6.71
  -6   8  -3   72.63    7.21
  -7   8  -3  185.30   12.05
   7   8   3  167.56   10.08
   7  -8   3  184.66    9.61
  -7  -8  -3  169.85   10.24
  -7   8  -3  154.85   10.22
  -8   8  -3  643.45   20.65
   8   8   3  726.78   20.71
   8  -8   3  670.39   19.93
  -8  -8  -3  663.31   18.98
  -8   8  -3  745.23   22.11
  -9   8  -3  244.73   14.53
   9   8   3  259.85   13.86
   9  -8   3  274.79   14.89
  -9  -8  -3  250.14   12.77
  -9   8  -3  199.34   13.66
 -10   8  -3   49.93    9.07
  10   8   3   83.45    8.92
  10  -8   3   78.39    9.64
 -10  -8  -3   78.67   10.08
 -10   8  -3   75.98    8.63
 -11   8  -3    8.11    8.25
  11   8   3    0.82    5.98
  11  -8   3   10.35    9.48
 -11  -8  -3    8.70    6.32
 -11   8  -3    2.54    9.19
  12   8   3    9.17    8.99
  12  -8   3   18.17    7.49
 -12  -8  -3   19.14    7.91
 -12   8  -3   15.21    9.77
  13   8   3  271.45   14.03
  13  -8   3  255.84   16.16
 -13  -8  -3  251.41   12.97
 -13   8  -3  263.44   14.11
  14   8   3  147.55   13.15
  14  -8   3  151.60   12.71
 -14  -8  -3  184.29   13.77
 -14   8  -3  161.58   14.02
  15  -8   3   11.93   10.16
 -15  -8  -3    7.85    7.21
 -15   8  -3    9.16    8.91
  16  -8   3   15.03   11.67
 -16  -8  -3   28.07   11.34
 -16   8  -3   31.89   11.80
  18  -9  -3  150.56   17.15
 -18  -9   3  137.91   10.55
 -18   9   3  148.45   15.40
  17   9  -3   69.79   13.21
  17  -9  -3   81.61   19.31
 -17  -9   3   72.49    9.81
 -17   9   3   69.20   16.62
  16   9  -3    2.97   10.50
  16  -9  -3    2.57   12.31
 -16  -9   3    6.30    9.44
 -16   9   3   12.35   12.78
  15   9  -3   79.50   11.22
  15   9  -3   87.79   12.31
  15  -9  -3  104.46   10.83
 -15  -9   3   75.59    8.55
 -15   9   3   75.14   12.67
  14   9  -3   64.26    8.71
  14   9  -3   71.28   11.46
  14  -9  -3  101.82   10.98
 -14  -9   3  103.83   10.86
 -14   9   3  103.06   10.03
  13   9  -3    0.10    7.75
  13   9  -3   -1.32    7.82
  13  -9  -3    7.22    9.59
 -13  -9   3   -5.83    8.15
 -13   9   3   -0.17    6.93
  12   9  -3  153.33   11.13
  12  -9  -3  158.22   10.77
 -12  -9   3  164.39   10.59
 -12   9   3  183.49   11.86
  11   9  -3    5.12    7.66
 -11   9   3   -2.89    6.29
  11   9  -3    0.92    8.84
  11  -9  -3   -5.67    7.10
 -11  -9   3    4.12    8.24
 -11   9   3    7.16    8.33
  10   9  -3    9.65    8.54
 -10   9   3   16.15    7.14
  10   9  -3   16.57    7.71
  10  -9  -3   12.36    6.97
  10  -9  -3   12.77    8.01
 -10  -9   3   11.54    6.66
   9   9  -3  542.49   18.84
  -9   9   3  404.89   25.78
   9   9  -3  578.34   21.96
   9  -9  -3  551.95   20.22
   9  -9  -3  482.85   18.00
  -9  -9   3  486.54   17.33
   8   9  -3  302.00   13.74
   8  -9  -3  273.24   12.78
  -8  -9   3  287.92   12.71
   8  -9  -3  334.25   15.85
  -8  -9   3  299.49   13.35
   7   9  -3   14.03    9.02
  -7   9   3    8.05    6.29
   7  -9  -3   11.77    6.69
  -7  -9   3    6.63    5.34
   7  -9  -3   24.01    7.83
  -7  -9   3   23.25    7.57
   6   9  -3  120.06    8.10
  -6   9   3  119.08    8.00
   6  -9  -3  117.93    9.07
  -6  -9   3  125.81    8.57
   6  -9  -3  141.92   11.20
  -6  -9   3  143.56   10.13
   5   9  -3   55.30    9.51
  -5   9   3   60.45    7.26
   5  -9  -3   50.25    6.78
  -5  -9   3   58.80    7.22
   5  -9  -3   59.31    7.63
  -5  -9   3   73.75    8.58
   4   9  -3    5.72    7.33
  -4   9   3    7.02    6.69
   4  -9  -3    6.78    5.34
  -4  -9   3    9.35    5.50
   4  -9  -3    4.16    5.52
  -4  -9   3    8.18    7.20
   3   9  -3   87.55    8.73
  -3   9   3   79.46    8.77
   3  -9  -3   69.97    6.77
  -3  -9   3   83.52    7.41
   3  -9  -3  104.27    9.66
  -3  -9   3   79.85    7.94
   2   9  -3    8.21    6.31
  -2   9   3    3.75    6.00
  -2  -9   3    0.34    4.03
   2  -9  -3    6.04    7.17
  -2  -9   3    6.57    6.16
   1   9  -3   94.60    8.47
  -1   9   3   93.44    7.74
  -1  -9   3   97.96    8.00
  -1  -9   3   85.87    8.38
   1  -9  -3   96.68    9.20
   0   9  -3  803.09   26.13
   0   9   3  818.09   25.32
   0  -9   3  775.95   25.58
   0  -9   3  770.10   31.22
   0  -9  -3  846.65   27.46
  -1   9  -3  324.59   14.61
   1   9   3  319.62   13.28
   1  -9   3  322.70   13.95
   1  -9   3  340.49   16.60
  -1  -9  -3  333.47   15.11
  -2   9  -3   20.36    6.72
   2   9   3   11.29    7.33
   2  -9   3   14.06    6.09
   2  -9   3    5.67    6.59
  -2  -9  -3   14.89    6.98
  -3   9  -3   45.05    7.57
   3   9   3   35.51    7.35
   3  -9   3   35.49    8.36
   3  -9   3    4.75    6.78
  -3  -9  -3   43.83    9.74
  -4   9  -3  185.08   11.09
   4   9   3  172.54    9.36
   4  -9   3  191.22   10.39
   4  -9   3  190.47   12.88
  -4  -9  -3  206.31   11.45
  -5   9  -3   47.43    8.87
   5   9   3   50.64    7.44
   5  -9   3   55.70    8.15
  -5  -9  -3   44.63    8.66
  -5   9  -3   40.53    6.85
  -6   9  -3  336.94   14.54
   6   9   3  340.68   13.85
   6  -9   3  336.52   13.16
  -6  -9  -3  384.28   14.50
  -6   9  -3  387.22   14.87
  -7   9  -3    7.79    5.56
   7   9   3   10.90    5.25
   7  -9   3    8.67    7.21
  -7  -9  -3   10.16    5.65
  -7   9  -3    5.64    6.96
  -8   9  -3    9.57    6.42
   8   9   3   -1.79    7.30
   8  -9   3   17.47    9.13
  -8  -9  -3    3.47    8.14
  -8   9  -3    0.81    7.49
  -9   9  -3  305.77   14.29
   9   9   3  345.22   15.06
   9  -9   3  334.50   14.78
  -9  -9  -3  348.30   14.93
  -9   9  -3  323.71   14.14
 -10   9  -3   42.01    9.45
  10   9   3   40.37    7.75
  10  -9   3   44.84   10.66
 -10  -9  -3   60.60    7.40
 -10   9  -3   60.92    9.23
 -11   9  -3   -7.09    9.83
  11   9   3    0.55    6.12
  11  -9   3    2.77    7.27
 -11  -9  -3    0.04   10.09
 -11   9  -3    3.31    7.50
  12   9   3  114.24    8.83
  12  -9   3  110.87   10.02
 -12  -9  -3  127.31   12.29
 -12   9  -3   92.47   10.29
  13   9   3   54.29   10.17
  13  -9   3   50.56   12.44
 -13  -9  -3   42.59   10.52
 -13   9  -3   27.67    8.30
  14   9   3    7.96   10.00
  14  -9   3   -0.06   11.65
 -14  -9  -3   14.87    9.00
 -14   9  -3   -3.31   10.90
  15  -9   3  139.00   13.14
 -15  -9  -3  162.63   13.85
 -15   9  -3  142.10   12.97
  16  -9   3   -8.44   14.05
 -16  -9  -3    1.44   10.35
 -16   9  -3   -7.44   12.39
  18 -10  -3   29.53   20.01
 -18 -10   3   54.09   11.15
 -18  10   3   32.83   12.01
  17 -10  -3   40.19   14.35
 -17 -10   3   21.74    9.68
 -17  10   3   10.48    9.64
  16  10  -3   -8.75   12.26
  16 -10  -3  -10.54   12.38
 -16 -10   3    3.09   13.17
 -16  10   3    4.47    8.98
  15  10  -3   10.35   10.87
  15  10  -3    1.05   11.96
  15 -10  -3   15.21    8.81
 -15 -10   3   10.28    8.50
 -15  10   3    8.87    9.12
  14  10  -3   18.71    9.20
  14  10  -3   21.12   10.11
  14 -10  -3   21.78   11.07
 -14 -10   3   35.71    8.61
 -14  10   3   14.46    7.23
  13  10  -3   10.93   10.47
  13  10  -3   -7.02    9.04
  13 -10  -3   -2.96    9.10
 -13 -10   3    0.32    9.14
 -13  10   3   -0.37    8.67
  12  10  -3    5.34    7.15
  12  10  -3    8.19    8.87
  12 -10  -3   -3.66    7.42
 -12 -10   3    3.42    7.02
 -12  10   3    7.18    7.13
 -11  10   3   11.40    7.43
  11  10  -3    3.65    7.98
  11  10  -3   19.86    9.12
  11 -10  -3   15.60    8.26
 -11 -10   3   13.22   10.05
 -11  10   3    8.73    6.98
  10  10  -3  109.88    8.98
 -10  10   3   80.76    9.01
  10 -10  -3   80.69    8.31
 -10 -10   3   98.93    9.61
  10 -10  -3   89.37    9.74
 -10 -10   3  103.30    8.11
   9  10  -3   49.52    9.30
  -9  10   3   51.83    8.40
   9 -10  -3   56.29    9.69
  -9 -10   3   39.57    7.01
   9 -10  -3   37.33   10.15
  -9 -10   3   52.81    9.10
   8  10  -3   44.72    8.73
  -8  10   3   33.83    7.11
   8 -10  -3   42.14   10.13
  -8 -10   3   38.29    6.75
   8 -10  -3   41.64   12.16
  -8 -10   3   53.18    9.36
   7  10  -3   34.53    7.34
  -7  10   3   46.03    8.35
   7 -10  -3   23.03    6.25
  -7 -10   3   28.38    6.75
   7 -10  -3   39.71    9.93
  -7 -10   3   30.26    7.13
   6  10  -3   96.80    8.47
  -6  10   3   93.27    8.77
   6 -10  -3   85.37    8.34
  -6 -10   3   95.99    8.59
   6 -10  -3   99.61   11.29
  -6 -10   3  101.62    9.81
   5  10  -3    7.13    5.84
  -5  10   3    3.43    5.41
   5 -10  -3    5.80    4.88
  -5 -10   3   -4.07    6.10
   5 -10  -3    2.40    6.89
  -5 -10   3    4.19    7.35
   4  10  -3    4.14    8.22
  -4  10   3    7.00    6.38
   4 -10  -3    0.71    5.44
  -4 -10   3    3.10    4.56
   4 -10  -3    3.01    8.62
  -4 -10   3    9.95    6.94
   3  10  -3   -5.48    7.54
  -3  10   3   -7.81    6.59
  -3 -10   3    1.98    4.98
   3 -10  -3    2.38    8.17
  -3 -10   3    5.18    6.27
   2  10  -3  110.22    8.11
  -2  10   3  108.67    7.29
  -2 -10   3  110.32    7.53
   2 -10  -3  110.57   10.77
  -2 -10   3  125.14    8.99
   1  10  -3  207.76   12.80
  -1  10   3  203.38   11.01
  -1 -10   3  190.08    8.33
  -1 -10   3  221.55   12.58
   1 -10  -3  183.34   12.22
   0  10  -3    5.86    7.29
   0  10   3    0.80    6.88
   0 -10   3    0.08    4.07
   0 -10   3    8.59    6.36
   0 -10  -3   11.16    6.10
  -1  10  -3   62.08    8.58
   1  10   3   52.22    7.55
   1 -10   3   50.89    7.18
   1 -10   3   60.18    7.82
  -1 -10  -3   52.81    8.99
  -2  10  -3   53.90    9.06
   2  10   3   55.78    7.65
   2 -10   3   52.66    5.92
   2 -10   3   54.57    7.89
  -2 -10  -3   57.64    8.73
  -3  10  -3    8.76    7.45
   3  10   3   11.66    7.16
   3 -10   3    3.31    5.47
   3 -10   3   -4.40    7.22
  -3 -10  -3    6.80    8.68
  -4  10  -3  126.75   10.59
   4  10   3  135.32   10.77
   4 -10   3  138.08    8.26
   4 -10   3  129.28   11.28
  -4 -10  -3  131.06    9.14
  -5  10  -3   23.02    9.56
   5  10   3   30.88    9.68
   5 -10   3   26.25    9.39
   5 -10   3    6.32    8.37
  -5 -10  -3   22.80    6.82
  -6  10  -3    7.16    8.49
   6  10   3    2.61    5.72
   6 -10   3   -2.84    5.96
  -6 -10  -3    3.67    6.26
  -6  10  -3   -8.44    7.83
  -7  10  -3  315.29   19.59
   7  10   3  272.24   17.49
   7 -10   3  298.96   19.24
  -7 -10  -3  303.28   19.83
  -7  10  -3  324.74   20.09
  -8  10  -3  243.95   14.22
   8  10   3  188.95    9.80
   8 -10   3  233.66   12.96
  -8 -10  -3  246.73   12.50
  -8  10  -3  219.62   12.58
  -9  10  -3   12.61    9.93
   9  10   3    6.89    9.19
   9 -10   3   18.93    7.84
  -9 -10  -3    9.43    7.04
  -9  10  -3    7.13    5.64
 -10  10  -3   30.33    9.75
  10  10   3   44.18   10.50
  10 -10   3   35.54    8.54
 -10 -10  -3   27.78    9.91
 -10  10  -3   35.37    8.71
 -11  10  -3   18.85   12.22
  11  10   3   21.12   11.36
  11 -10   3   26.34   10.33
 -11 -10  -3   19.36    6.87
 -11  10  -3    7.13    7.20
  12  10   3    5.96    7.48
  12 -10   3   14.22    7.75
 -12 -10  -3   10.59    6.63
 -12  10  -3   17.49    7.46
  13  10   3   37.83   10.13
  13 -10   3   46.92   11.38
 -13 -10  -3   56.72    8.26
 -13  10  -3   58.34    8.61
  14  10   3   44.79   11.08
  14 -10   3   23.03   10.95
 -14 -10  -3   29.80    8.25
 -14  10  -3   23.25   10.01
  15 -10   3    9.77    9.89
 -15 -10  -3   -4.52   11.08
  17 -11  -3   95.73   17.82
 -17 -11   3   49.53   10.62
 -17  11   3   57.58   13.22
  16 -11  -3  -10.92   11.88
 -16 -11   3    1.41   10.20
 -16  11   3    1.54    8.93
  15  11  -3   -1.26   12.12
  15 -11  -3    1.56   11.66
 -15 -11   3    4.15   13.37
 -15  11   3   -1.55    8.11
  14  11  -3   -0.15    7.80
  14 -11  -3    2.61    9.41
 -14 -11   3    6.42   10.33
 -14  11   3    2.15   11.62
  13  11  -3   -1.75    8.41
  13  11  -3    0.12    8.41
  13 -11  -3    2.70    7.68
 -13 -11   3   14.07    8.91
 -13  11   3   -1.93    8.86
  12  11  -3   20.02   10.16
  12 -11  -3   14.44    8.68
 -12 -11   3   20.67    8.34
 -12 -11   3   21.33    8.45
 -12  11   3   22.72    9.31
  11  11  -3   14.73   11.15
 -11  11   3   -0.01    8.09
  11 -11  -3   18.31    9.55
 -11 -11   3    0.80    6.51
  11 -11  -3   -0.37   10.66
 -11 -11   3    1.09    9.98
  10  11  -3   -3.15    9.98
 -10  11   3    2.65    7.96
  10 -11  -3   10.99    7.76
 -10 -11   3    4.95    7.29
  10 -11  -3    5.33    8.87
 -10 -11   3    1.87    9.18
   9  11  -3  292.87   12.91
  -9  11   3  246.29   14.64
   9 -11  -3  294.40   14.83
   9 -11  -3  270.16   15.17
  -9 -11   3  245.07   13.56
   8  11  -3   26.95    6.69
  -8  11   3   24.72    8.44
   8 -11  -3   38.39    9.48
  -8 -11   3   15.66    6.12
   8 -11  -3   22.86    7.83
  -8 -11   3   18.81    8.81
   7  11  -3    9.45    8.22
  -7  11   3    5.87    8.23
   7 -11  -3   -1.90    6.61
  -7 -11   3   -2.40    5.87
   7 -11  -3   -5.31    9.12
  -7 -11   3   -5.01    7.97
   6  11  -3   23.28    9.83
  -6  11   3   17.30    6.17
   6 -11  -3   12.44    5.90
  -6 -11   3   10.83    5.98
   6 -11  -3   20.08    9.80
  -6 -11   3   12.94    6.25
   5  11  -3   -2.36    7.18
  -5  11   3   -2.04    9.52
   5 -11  -3   -1.94    5.24
  -5 -11   3    5.80    5.77
   5 -11  -3   -1.98    7.57
  -5 -11   3   -0.83    8.14
   4  11  -3   -2.74    6.71
  -4  11   3   -3.17    7.66
  -4 -11   3   -0.01    5.25
   4 -11  -3   -2.84   10.63
  -4 -11   3   -4.02    8.68
   3  11  -3   18.19    7.68
  -3  11   3   20.79    8.12
  -3 -11   3   14.15    6.40
   3 -11  -3   14.84    7.56
  -3 -11   3    8.60    6.51
   2  11  -3   12.24    7.65
  -2  11   3   10.70    5.80
  -2 -11   3   13.96    6.39
   2 -11  -3   15.17   10.59
  -2 -11   3    4.36    5.96
   1  11  -3   16.46    9.81
  -1  11   3   14.53    6.43
  -1 -11   3   19.45    6.26
  -1 -11   3   15.20    5.96
   1 -11  -3   25.52    9.22
   0  11  -3  260.88   11.96
   0  11   3  263.43   11.85
   0 -11   3  267.05   11.61
   0 -11   3  227.32   12.89
   0 -11  -3  269.84   13.09
  -1  11  -3  226.11   11.24
   1  11   3  201.40    9.68
   1 -11   3  209.91   10.60
   1 -11   3  202.94   12.85
  -1 -11  -3  215.05   11.80
  -2  11  -3   16.25    7.37
   2  11   3   24.91    7.78
   2 -11   3   20.75    6.03
   2 -11   3    3.96    8.70
  -2 -11  -3   18.25    7.93
  -3  11  -3   -1.83    6.94
   3  11   3    2.45    5.34
   3 -11   3   -2.62    4.73
   3 -11   3    3.57    8.79
  -3 -11  -3   14.53    9.12
  -4  11  -3   61.35   10.96
   4  11   3   59.00    8.93
   4 -11   3   65.95    9.19
   4 -11   3   36.55    8.53
  -4 -11  -3   77.37    8.15
  -5  11  -3   15.65    8.88
   5  11   3   14.77    8.75
   5 -11   3   13.59    6.17
   5 -11   3   12.02    9.54
  -5 -11  -3   12.63    7.59
  -6  11  -3   71.89    9.78
   6  11   3   57.60    7.80
   6 -11   3   71.74    8.48
  -6 -11  -3   72.62    9.82
  -6  11  -3   66.86    9.48
  -7  11  -3    7.29   10.83
   7  11   3    2.79    6.85
   7 -11   3   11.24    9.20
  -7 -11  -3    9.72    8.65
  -7  11  -3   -3.93    6.21
  -8  11  -3    3.88    7.78
   8  11   3    0.44    9.11
   8 -11   3    2.65    7.06
  -8 -11  -3    9.27    9.57
  -8  11  -3   15.56    7.73
  -9  11  -3  207.40   15.46
   9  11   3  198.56   12.72
   9 -11   3  178.37   12.06
  -9 -11  -3  231.80   16.67
  -9  11  -3  197.89   13.11
 -10  11  -3   59.97   12.10
  10  11   3   65.71    7.87
  10 -11   3   75.32   11.84
 -10 -11  -3   61.54    8.80
 -10  11  -3   57.70    9.48
  11  11   3    2.82    8.31
  11 -11   3   -3.96    8.36
 -11 -11  -3    0.68   10.44
 -11  11  -3    6.26    7.88
  12  11   3   36.79    9.97
  12 -11   3   55.52   11.73
 -12 -11  -3   64.87    9.41
 -12  11  -3   45.80   10.88
  13  11   3   14.85   12.50
  13 -11   3   19.17    9.15
 -13 -11  -3   33.75    8.94
 -13  11  -3   18.62   12.41
  14 -11   3   43.22   11.90
 -14 -11  -3   36.28    9.59
  16 -12  -3   -5.79   15.62
 -16 -12   3    5.78   14.34
 -16  12   3   -0.39   12.56
  15 -12  -3    1.35   16.28
 -15 -12   3    1.64   12.37
 -15  12   3    0.50    9.77
  14  12  -3   34.51   13.07
  14 -12  -3   32.69   14.20
 -14 -12   3   14.38   12.15
 -14  12   3   12.62    9.93
  13  12  -3   18.29   11.93
  13 -12  -3    5.50   12.68
 -13 -12   3   -0.83    7.91
 -13  12   3    1.12    8.92
  12  12  -3   -1.26    8.64
  12 -12  -3   16.63   11.22
 -12 -12   3   -3.01   10.64
 -12  12   3    6.96    7.60
  11  12  -3    7.23    9.57
  11 -12  -3    8.79   10.84
  11 -12  -3    1.25   10.22
 -11 -12   3    1.33   10.70
  10  12  -3   -0.53    6.84
 -10  12   3   -3.27    9.01
  10 -12  -3    0.95   10.04
  10 -12  -3   -1.86   11.55
 -10 -12   3    4.61    8.61
   9  12  -3    7.02    6.92
  -9  12   3   11.49    6.70
   9 -12  -3    6.46    8.20
  -9 -12   3   10.49    7.05
   9 -12  -3   15.20   12.75
  -9 -12   3    2.23   10.04
   8  12  -3    6.13    8.64
  -8  12   3   12.76    9.14
   8 -12  -3   10.22    9.41
  -8 -12   3    3.54    7.23
   8 -12  -3   11.81   13.62
  -8 -12   3    3.57   10.96
   7  12  -3   87.53    8.75
  -7  12   3   85.97    8.52
   7 -12  -3  102.37   14.62
  -7 -12   3   73.77    9.98
   6  12  -3   31.25    9.90
  -6  12   3   34.71    7.85
   6 -12  -3   45.28   12.58
  -6 -12   3   51.45    9.03
   5  12  -3  118.78    9.24
  -5  12   3  111.60    8.94
  -5 -12   3  121.37    8.27
   5 -12  -3  132.42   11.98
  -5 -12   3  108.82   10.98
   4  12  -3   53.18   10.06
  -4  12   3   57.26    7.40
  -4 -12   3   53.32    7.07
   4 -12  -3   46.11    8.85
  -4 -12   3   56.32    9.12
   3  12  -3  108.80   11.58
  -3  12   3  121.17   10.32
  -3 -12   3  130.15    8.81
   3 -12  -3  104.57    8.86
  -3 -12   3  100.40    8.96
   2  12  -3    9.39    9.28
  -2  12   3    3.53    6.50
  -2 -12   3    7.54    5.62
   2 -12  -3    0.30    6.02
  -2 -12   3    6.71    7.43
   1  12  -3  105.40    8.71
  -1  12   3   89.19   10.28
  -1 -12   3  106.61    9.62
  -1 -12   3   87.73    9.58
   1 -12  -3   98.15   10.99
   0  12  -3   59.61    9.82
   0  12   3   57.60    8.93
   0 -12   3   68.15    8.48
   0 -12   3   37.77    8.89
   0 -12  -3   43.05    7.71
  -1  12  -3   19.03    6.87
   1  12   3   23.07    7.37
   1 -12   3   19.90    8.45
   1 -12   3   13.85    7.69
  -1 -12  -3   21.83    8.01
  -2  12  -3   23.85    7.28
   2  12   3   31.99    8.05
   2 -12   3   15.03    7.62
   2 -12   3   13.56    7.33
  -2 -12  -3   10.02    9.98
  -3  12  -3  102.57    8.52
   3  12   3   91.24    8.15
   3 -12   3  110.66    7.87
   3 -12   3   70.90   10.60
  -3 -12  -3  116.91   10.59
  -4  12  -3  133.04   10.80
   4  12   3  161.98   13.12
   4 -12   3  164.58   11.14
   4 -12   3  125.24   13.16
  -4 -12  -3  144.63   11.23
  -5  12  -3   63.17   12.94
   5  12   3   50.34    8.53
   5 -12   3   69.18    9.33
   5 -12   3   61.21   11.39
  -5 -12  -3   63.40    8.83
  -6  12  -3   -3.19   11.77
   6  12   3    4.65   10.03
   6 -12   3   -4.15    8.31
  -6 -12  -3    5.61    9.55
  -6  12  -3    2.84    7.93
  -7  12  -3    9.54    9.58
   7  12   3    5.89    6.25
   7 -12   3    9.52   11.31
  -7 -12  -3   16.95    8.20
  -7  12  -3   13.94    8.98
  -8  12  -3  160.00   14.84
   8  12   3  159.08   13.18
   8 -12   3  183.43   12.80
  -8 -12  -3  188.91   14.16
  -9  12  -3   17.13   10.16
   9  12   3    3.87    7.81
   9 -12   3   11.13   10.33
  -9 -12  -3   12.56    9.45
  -9  12  -3   -0.96    9.33
 -10  12  -3   57.97   11.16
  10  12   3   69.70    9.61
  10 -12   3   76.69   10.01
 -10 -12  -3   74.87    9.09
 -10  12  -3   85.97   11.79
  11  12   3    3.03   11.26
  11 -12   3    1.17   14.20
 -11 -12  -3   -3.70   11.06
 -11  12  -3    2.27   10.66
  12  12   3    4.40    9.45
  12 -12   3    0.00   10.33
 -12 -12  -3    6.38   10.34
  13  12   3   -1.28    8.37
  13 -12   3   -5.37   11.46
 -13 -12  -3   -4.09   10.45
  14  13  -3   17.81   11.76
 -14 -13   3   17.51   13.46
 -14  13   3   19.12   10.09
  13  13  -3    7.11   12.41
  13 -13  -3   -9.32   10.19
 -13 -13   3    9.10    9.28
 -13  13   3   10.74   11.22
  12  13  -3  217.17   18.46
  12 -13  -3  199.93   17.97
 -12 -13   3  213.09   18.03
 -12  13   3  266.76   17.56
  11  13  -3   13.45    7.52
  11 -13  -3   -0.42   13.02
  11 -13  -3   13.12   15.10
 -11 -13   3    9.15   12.42
  10  13  -3    4.17   11.18
 -10  13   3    5.20    7.39
  10 -13  -3    6.36   11.32
  10 -13  -3    7.05   11.77
 -10 -13   3    2.95    8.26
   9  13  -3  427.41   20.91
  -9  13   3  430.38   19.84
   9 -13  -3  391.50   24.81
  -9 -13   3  484.91   20.11
   8  13  -3   -9.11   10.81
  -8  13   3   -0.75    9.48
   8 -13  -3    7.29   12.77
  -8 -13   3  -14.70    9.49
   7  13  -3   46.68    9.58
  -7  13   3   40.40    7.70
   7 -13  -3   33.17   12.82
  -7 -13   3   30.43    7.76
   6  13  -3    8.65    7.06
  -6  13   3   -4.87   11.14
   6 -13  -3    3.16    9.58
  -6 -13   3    6.64   10.59
   5  13  -3  101.66   10.77
  -5  13   3  124.75   11.35
  -5 -13   3  104.80    8.68
   5 -13  -3  119.47   11.63
  -5 -13   3  110.12   11.81
   4  13  -3    3.38    8.57
  -4  13   3    6.24    8.92
  -4 -13   3    0.22    6.13
   4 -13  -3    5.11    9.61
  -4 -13   3    9.05    7.33
   3  13  -3   52.03    8.35
  -3  13   3   71.27    7.97
  -3 -13   3   51.74    7.31
   3 -13  -3   67.30    9.98
  -3 -13   3   61.38    9.00
   2  13  -3    6.96    7.32
  -2  13   3   10.46   10.76
  -2 -13   3    5.04    6.42
   2 -13  -3   -3.88    8.41
  -2 -13   3    0.93    8.89
   1  13  -3   -0.62    8.85
  -1  13   3   -3.62    9.54
  -1 -13   3    0.42    7.14
  -1 -13   3    1.06    8.90
   1 -13  -3    3.25   11.11
   0  13  -3  422.25   17.92
   0  13   3  391.92   16.21
   0 -13   3  380.01   15.53
   0 -13  -3  451.13   19.33
  -1  13  -3  164.17   12.03
   1  13   3  166.62   11.80
   1 -13   3  172.38   10.79
   1 -13   3  143.28   12.41
  -1 -13  -3  164.72   11.50
  -2  13  -3   22.59    9.78
   2  13   3   12.59    6.49
   2 -13   3    7.70    6.96
   2 -13   3   -5.74    9.23
  -2 -13  -3   11.58   10.01
  -3  13  -3   43.00    8.27
   3  13   3   37.63   10.66
   3 -13   3   36.39    7.53
   3 -13   3   32.60    9.87
  -3 -13  -3   53.63   11.28
  -4  13  -3  110.71   10.82
   4  13   3  114.67   10.44
   4 -13   3   94.65   10.14
   4 -13   3   71.91   11.06
  -4 -13  -3  136.18   13.96
  -5  13  -3    7.94   10.53
   5  13   3   -2.41    7.53
   5 -13   3   -2.57    8.54
   5 -13   3   -3.49    8.32
  -5 -13  -3    1.39   12.02
  -6  13  -3   57.22   11.22
   6  13   3   53.24   10.44
   6 -13   3   42.20    7.93
   6 -13   3   40.73   11.87
  -6 -13  -3   53.56   12.71
  -7  13  -3   19.05    8.50
   7  13   3    2.90    9.96
   7 -13   3    8.90    9.04
  -7 -13  -3   10.60    9.75
  -7  13  -3    7.74    8.27
  -8  13  -3    2.89    9.39
   8  13   3    2.57    7.00
   8 -13   3    6.12   10.18
  -8 -13  -3    0.86    8.38
  -8  13  -3    2.76    8.08
  -9  13  -3  121.37   12.16
   9  13   3  160.81   14.06
   9 -13   3  118.74   10.99
  -9 -13  -3  150.97   11.59
  -9  13  -3  140.90   14.20
  10  13   3   97.55   11.52
  10 -13   3  100.65   13.77
 -10 -13  -3   69.19    9.80
  11  13   3    5.99    9.55
  11 -13   3    5.56   12.77
 -11 -13  -3    7.21   10.41
  12  13   3   57.89    9.95
  12 -13   3   52.35   11.85
 -12 -13  -3   59.61   12.80
  13  14  -3   12.25   11.06
 -13 -14   3  -11.81   10.28
 -13  14   3    2.14   10.63
  12  14  -3   -1.62   12.43
 -12 -14   3    0.23   13.23
 -12  14   3   11.25   10.74
  11  14  -3    4.42   10.55
  11 -14  -3   21.51   12.37
 -11 -14   3   13.35   12.36
  10  14  -3   34.80   13.75
 -10  14   3   14.24   11.31
  10 -14  -3   19.03   14.72
 -10 -14   3   13.25    8.77
   9  14  -3    5.70   10.67
  -9  14   3   -6.19    8.39
   9 -14  -3    5.84   12.19
  -9 -14   3   12.39   11.00
   8  14  -3   47.68   10.53
  -8  14   3   38.59   10.89
   8 -14  -3   77.59   14.46
  -8 -14   3   51.84   12.72
   7  14  -3   20.23   12.84
  -7  14   3   21.74    7.36
   7 -14  -3   13.85   10.23
  -7 -14   3   45.86   11.49
   6  14  -3   52.75    9.62
  -6  14   3   40.80   10.34
   6 -14  -3   22.48   13.59
  -6 -14   3   37.89   11.63
   5  14  -3  112.44   14.37
  -5  14   3  139.11   12.55
   5 -14  -3  109.40   13.77
  -5 -14   3   94.56   11.06
   4  14  -3   11.32    7.89
  -4  14   3   16.46    7.49
   4 -14  -3   24.57    9.84
  -4 -14   3   23.50    9.31
   3  14  -3   38.41    9.16
  -3  14   3   44.24    9.14
   3 -14  -3   26.29   10.95
  -3 -14   3    7.98    9.25
   2  14  -3   56.99   10.21
  -2  14   3   47.71    8.37
  -2 -14   3   43.87    8.37
   2 -14  -3   50.39   12.09
  -2 -14   3   44.48   10.11
   1  14  -3  208.29   13.71
  -1  14   3  199.32   12.57
  -1 -14   3  174.84   12.51
  -1 -14   3  173.98   13.96
   1 -14  -3  193.46   14.00
   0  14  -3   -2.19   11.10
   0  14   3    3.89    8.74
   0 -14   3    2.48    6.64
   0 -14   3    0.50    9.01
   0 -14  -3    7.34   13.51
  -1  14  -3  165.39   11.88
   1  14   3  148.00   11.59
   1 -14   3  153.10   11.63
   1 -14   3  106.36   11.42
  -1 -14  -3  170.10   14.74
  -2  14  -3   34.03   12.27
   2  14   3   39.69   11.27
   2 -14   3   20.60    8.68
   2 -14   3    0.26    7.65
  -2 -14  -3   41.16    9.92
  -3  14  -3   54.86   10.54
   3  14   3   61.69    8.81
   3 -14   3   66.51   10.04
   3 -14   3   43.97   10.05
  -3 -14  -3   88.04   11.15
  -4  14  -3  199.17   15.40
   4  14   3  214.57   12.26
   4 -14   3  207.82   13.24
   4 -14   3  139.60   14.97
  -4 -14  -3  216.58   14.23
  -5  14  -3   53.84   12.35
   5  14   3   36.01    8.77
   5 -14   3   50.42    8.88
   5 -14   3   23.33    9.23
  -5 -14  -3   40.63   14.58
  -6  14  -3   30.68    9.87
   6  14   3   24.54    8.35
   6 -14   3   39.92   11.57
   6 -14   3    4.32   12.75
  -6 -14  -3   28.84   10.20
  -7  14  -3   25.55   11.75
   7  14   3    2.60   10.10
   7 -14   3   14.71    9.69
  -7 -14  -3   -7.26    9.58
  -8  14  -3  151.38   17.14
   8  14   3  180.88   14.25
   8 -14   3  155.54   14.85
  -8 -14  -3  171.57   14.46
  -9  14  -3    8.96   13.36
   9  14   3   14.40    8.13
   9 -14   3   23.41   10.96
  -9 -14  -3   24.13   10.10
  10  14   3    4.87   10.98
  10 -14   3  -12.41   14.35
 -10 -14  -3    0.58    9.75
  11  15  -3   26.50   10.47
  11 -15  -3   17.59   14.60
 -11 -15   3   14.91   14.12
  10  15  -3    8.13   11.86
  10 -15  -3    2.59   10.21
 -10 -15   3   -4.25   10.70
   9  15  -3  476.69   24.95
  -9  15   3  338.40   20.64
   9 -15  -3  390.68   27.81
  -9 -15   3  445.17   27.63
   8  15  -3   -0.19   15.37
  -8  15   3    6.12   10.81
   8 -15  -3    6.93   10.09
  -8 -15   3    0.79   11.57
   7  15  -3   16.18   11.71
  -7  15   3    3.88    8.47
   7 -15  -3   16.90   15.21
  -7 -15   3   13.41   10.97
   6  15  -3   40.41    9.00
  -6  15   3   44.94   11.27
   6 -15  -3   48.44   11.11
  -6 -15   3   37.35   11.85
   5  15  -3   13.22   10.17
  -5  15   3   22.24    7.93
   5 -15  -3   16.86   15.41
  -5 -15   3   11.67    9.11
   4  15  -3   69.43    9.40
  -4  15   3   37.32    8.32
   4 -15  -3   48.85   11.13
  -4 -15   3   31.77    8.41
   3  15  -3  284.35   16.49
  -3  15   3  321.36   20.97
   3 -15  -3  356.80   23.80
  -3 -15   3  211.96   16.05
   2  15  -3   73.88   12.59
  -2  15   3   45.50   11.35
   2 -15  -3   69.49   11.76
  -2 -15   3   28.26   10.37
   1  15  -3   48.17    8.68
  -1  15   3   30.12   10.77
  -1 -15   3   33.23   11.06
   1 -15  -3   43.06   14.31
   0  15  -3  547.09   26.99
   0  15   3  477.44   25.29
   0 -15  -3  502.85   30.21
  -1  15  -3   95.79   13.45
   1  15   3   70.48   10.07
   1 -15   3   67.67   13.09
  -1 -15  -3   64.05   14.74
  -2  15  -3    6.31   10.57
   2  15   3    4.96    7.88
   2 -15   3    7.43    9.58
  -2 -15  -3   -5.14   13.03
  -3  15  -3   12.82   10.83
   3  15   3   24.64   10.21
   3 -15   3    6.98   10.42
   3 -15   3   15.55   13.29
  -3 -15  -3   12.63   14.32
  -4  15  -3  197.74   15.55
   4  15   3  147.65   12.51
   4 -15   3  149.54   14.29
   4 -15   3  111.64   14.87
  -4 -15  -3  235.62   16.84
  -5  15  -3   36.18   10.60
   5  15   3   44.35    9.48
   5 -15   3   27.67   10.52
  -5 -15  -3   41.64   11.99
  -6  15  -3  117.13   13.17
   6  15   3  139.50   12.12
   6 -15   3  119.94   14.99
  -6 -15  -3  123.94   13.30
  -7  15  -3    6.08   13.64
   7  15   3   -5.89   13.11
   7 -15   3    0.88   10.56
  -7 -15  -3    8.05   15.83
  -8  15  -3   15.59   15.71
   8  15   3    4.73    8.67
   8 -15   3    8.72   12.37
  -8 -15  -3    6.92   16.77
   9  15   3  110.62   15.42
   9 -15   3   85.69   15.16
  -9 -15  -3   96.18   12.82
   9  16  -3   21.41   13.82
   9 -16  -3   23.89   14.13
   8  16  -3   41.13   12.27
  -8  16   3   24.74   11.77
   8 -16  -3   24.27   14.16
   7  16  -3   -0.32   10.11
  -7  16   3    6.69    9.85
   7 -16  -3   11.46   11.41
  -7 -16   3   -0.89   13.43
   6  16  -3    0.13    9.10
  -6  16   3   -2.06    8.54
   6 -16  -3    6.56    9.42
  -6 -16   3   -8.06   12.20
   5  16  -3   35.19   11.78
  -5  16   3   43.46    9.45
   5 -16  -3   51.22   13.64
  -5 -16   3   42.98   13.24
   4  16  -3    3.43    9.76
  -4  16   3   24.09   12.48
   4 -16  -3   -0.08   11.45
  -4 -16   3    6.25   11.96
   3  16  -3   -2.84    7.86
  -3  16   3    2.38    8.45
   3 -16  -3    4.20   10.40
  -3 -16   3   -0.04   11.72
   2  16  -3   28.79   12.38
  -2  16   3    3.83   11.92
   2 -16  -3    9.92   12.89
  -2 -16   3    0.43   11.68
   1  16  -3   60.57   11.33
  -1  16   3   49.71   13.25
   1 -16  -3   53.80   15.91
   0  16  -3    9.89   10.74
   0  16   3    9.97   10.83
   0 -16  -3   -6.53   14.45
  -1  16  -3   28.16   11.35
   1  16   3   34.96    8.63
  -1 -16  -3   19.63   14.77
  -2  16  -3   30.92   12.97
   2  16   3    6.84   11.87
  -2 -16  -3   34.43   16.49
  -3  16  -3    3.14   12.64
   3  16   3    5.73    7.89
  -3 -16  -3    7.36   11.36
  -4  16  -3   49.84   12.98
   4  16   3   61.31   10.58
  -4 -16  -3   34.57   14.03
  -5  16  -3   12.85   13.28
   5  16   3   31.71   11.66
  -5 -16  -3   20.87   11.28
  -6  16  -3    1.82   15.14
   6  16   3   14.60   14.94
  -6 -16  -3    2.84   17.03
   5  17  -3    3.84   13.84
  -5  17   3    3.14   10.61
   5 -17  -3   -3.35   12.30
   4  17  -3    9.48   10.85
  -4  17   3  -11.46   12.61
   4 -17  -3    0.61   15.75
   3  17  -3   34.41    9.46
  -3  17   3   36.98   11.97
   3 -17  -3   39.31   14.76
   2  17  -3   12.91    9.83
  -2  17   3    4.14    9.96
   2 -17  -3   11.71   13.99
   1  17  -3   -3.28    8.75
  -1  17   3   -2.08   11.92
   1 -17  -3   -8.81   12.90
   0  17  -3  227.75   14.36
   0  17   3  231.79   13.04
   0 -17  -3  230.76   18.28
  -1  17  -3   15.80   13.87
   1  17   3   12.04   12.41
  -1 -17  -3   12.88   17.79
  -2  17  -3    8.19   15.24
   2  17   3   -7.65    9.94
  -2 -17  -3   -3.05   13.17
  -3 -17  -3  -12.28   16.28
  21   0  -4   15.40   10.58
 -21   0   4   42.99   12.81
  20   0  -4   33.87   12.50
 -20   0   4   10.55    7.89
  19   0  -4    7.29    8.25
 -19   0   4    5.17    7.50
  18   0  -4  444.18   23.43
 -18   0   4  470.40   22.15
  17   0  -4   12.01    7.82
 -17   0   4    2.52    9.27
  16   0  -4   32.77   13.10
 -16   0   4   14.29    8.81
  15   0  -4   19.83    9.13
 -15   0   4   33.70    6.58
  14   0  -4   33.31    9.59
 -14   0   4   37.27    7.07
  13   0  -4  652.33   23.90
 -13   0   4  669.25   22.29
  12   0  -4  299.78   14.75
 -12   0   4  312.01   13.54
  11   0  -4   80.18    7.83
 -11   0   4   72.75    7.61
  10   0  -4 2436.70   46.58
 -10   0   4 2546.37   39.50
   9   0  -4 1803.23   42.52
   9   0  -4 1939.58   45.11
  -9   0   4 1847.53   44.93
   8   0  -4  242.12   10.77
   8   0  -4  274.02   11.71
  -8   0   4  258.93   10.36
   7   0  -4 2610.57   58.04
   7   0  -4 2888.36   64.56
  -7   0   4 2584.90   59.50
   6   0  -4  322.49   12.25
   6   0  -4  370.38   15.28
  -6   0   4  340.68   10.71
   5   0  -4   30.51    6.10
   5   0  -4   36.60    7.02
  -5   0   4   28.83    4.81
   4   0  -4 1879.30   42.58
   4   0  -4 1897.04   42.48
  -4   0   4 1952.13   41.29
   3   0  -4  833.92   22.93
   3   0  -4  808.80   23.24
   3   0  -4  839.82   23.08
   2   0  -4 1277.27   32.19
  -2   0   4 1200.17   26.76
   2   0  -4 1188.98   29.33
   1   0  -4 4997.42   56.77
   0   0  -4  369.07   14.40
   0   0   4  367.37   12.42
   0   0  -4  362.68   11.47
  -1   0  -4    2.74    7.09
   1   0   4   10.00    5.22
  -1   0  -4    6.67    4.63
  -2   0  -4  526.20   17.72
   2   0   4  533.66   15.72
  -2   0  -4  513.29   16.12
  -3   0  -4 1878.77   41.88
   3   0   4 1901.38   40.30
  -3   0  -4 1917.15   41.74
  -4   0  -4 2939.60   62.36
   4   0   4 2840.22   60.48
  -4   0  -4 3067.42   63.75
  -5   0  -4 2535.29   55.06
   5   0   4 2464.17   52.37
  -5   0  -4 2508.39   53.04
  -6   0  -4  341.64   13.61
   6   0   4  309.04   11.06
  -6   0  -4  309.37   11.27
  -7   0  -4 1333.53   27.75
   7   0   4 1384.08   27.65
  -7   0  -4 1322.88   25.87
  -8   0  -4 3031.94   77.02
   8   0   4 2803.62   75.25
  -8   0  -4 2836.79   71.82
  -9   0  -4    2.25    6.23
   9   0   4   -2.46    6.75
  -9   0  -4    2.22    6.43
 -10   0  -4   23.52    5.73
  10   0   4   19.18    7.41
 -10   0  -4   19.62    6.28
 -11   0  -4   49.90    8.15
  11   0   4   51.78    9.07
 -11   0  -4   39.01    8.25
  12   0   4  152.28    8.89
  12   0   4  183.05   14.24
 -12   0  -4  170.70   10.75
  13   0   4  414.98   15.93
 -13   0  -4  444.99   15.44
  14   0   4  744.55   31.13
 -14   0  -4  700.56   26.86
  15   0   4    0.30   12.20
 -15   0  -4    4.08    9.54
  16   0   4  240.61   16.62
 -16   0  -4  248.79   15.67
  17   0   4  500.25   29.59
 -17   0  -4  497.39   25.50
  18   0   4  -13.12   12.78
 -18   0  -4    3.87    7.52
  21   1  -4    4.08   15.44
  21  -1  -4    4.10   15.10
 -21  -1   4    3.36   11.40
 -21   1   4   -4.20   11.52
  20   1  -4   -5.01   13.62
  20  -1  -4   13.45   14.53
 -20  -1   4    9.31    7.10
 -20   1   4    0.62   10.89
  19   1  -4   12.64   10.46
  19  -1  -4   21.18    9.45
 -19  -1   4   16.75    9.81
 -19   1   4   11.61    8.19
  18   1  -4    3.43   13.55
  18  -1  -4   -0.39    9.38
 -18  -1   4   -0.13    7.98
 -18   1   4   -0.40    9.02
  17   1  -4    9.84   10.89
  17  -1  -4    1.85   11.33
 -17  -1   4    2.36    9.57
 -17   1   4    5.35    6.32
  16   1  -4   -3.87    9.91
  16  -1  -4    6.35    9.52
 -16  -1   4    3.51    7.40
 -16   1   4    2.92    7.42
  15   1  -4   79.83    8.48
  15  -1  -4   92.11    9.05
 -15  -1   4   91.42    9.48
 -15   1   4  106.85    9.79
  14   1  -4   11.58    8.68
  14  -1  -4    1.32   10.06
 -14  -1   4    1.96    8.24
 -14   1   4    7.86    7.14
  13   1  -4    5.95    9.14
  13  -1  -4   19.50    8.63
 -13  -1   4   12.13    5.78
 -13   1   4   11.92    5.50
  12   1  -4   16.93    8.43
  12  -1  -4   19.70    6.39
 -12  -1   4   13.50    5.95
 -12   1   4   24.81    6.62
  11   1  -4    0.41    4.46
  11   1  -4   -0.80    8.77
  11  -1  -4    3.84    7.43
 -11  -1   4    1.60    6.28
 -11   1   4    5.99    6.59
  10   1  -4   51.68    5.74
  10   1  -4   57.53    7.39
  10  -1  -4   62.67   11.76
 -10  -1   4   64.09    7.88
 -10   1   4   75.96   10.85
   9  -1  -4   76.36    6.55
   9   1  -4   85.78    7.16
   9   1  -4   93.70    8.94
   9  -1  -4   92.90    9.96
  -9  -1   4  104.65    7.78
  -9   1   4   92.37    9.35
   8  -1  -4   63.53    6.16
   8   1  -4   66.88    6.46
   8   1  -4   68.39    8.67
   8  -1  -4   70.36    8.12
  -8  -1   4   81.67    7.45
  -8   1   4   68.40    6.66
   7  -1  -4    8.19    4.49
   7   1  -4    7.76    4.98
   7   1  -4    9.62    6.98
  -7  -1   4   14.33    4.14
  -7   1   4   10.31    5.53
   6  -1  -4    0.88    4.59
   6   1  -4   -2.01    4.56
   6   1  -4    0.99    7.60
   6  -1  -4   -4.63    5.98
  -6  -1   4    1.66    3.52
  -6   1   4    0.47    4.94
   5  -1  -4   13.90    5.25
   5   1  -4   19.86    5.77
   5   1  -4   19.04    6.69
   5  -1  -4   14.02    7.02
   5  -1  -4   15.20    6.77
  -5  -1   4   20.08    4.23
   4  -1  -4   59.56    6.55
   4   1  -4   62.77    6.46
   4   1  -4   58.40    7.13
   4  -1  -4   56.32    6.91
   4  -1  -4   56.82    6.61
  -4  -1   4   66.52    6.14
   3  -1  -4  285.79   11.46
   3   1  -4  301.16   11.42
   3   1  -4  293.38   11.55
   3  -1  -4  306.57   12.45
   3  -1  -4  322.47   12.35
  -3  -1   4  309.45   10.04
   2  -1  -4   29.12    6.29
   2   1  -4   33.25    7.16
   2  -1  -4   30.12    6.53
  -2  -1   4   31.11    5.38
   2   1  -4   30.88    7.49
   2  -1  -4   32.08    5.83
   1  -1  -4    9.10    6.27
   1   1  -4   11.52    5.71
  -1  -1   4   13.86    5.66
  -1   1   4   13.75    4.40
   1   1  -4   20.61    5.78
   1  -1  -4   13.76    5.11
   0  -1  -4   97.18    9.56
   0   1  -4  105.87    9.55
   0  -1   4  106.08    7.42
   0   1   4  100.92    6.54
   0  -1  -4   95.20    7.09
   0   1  -4   91.54    7.33
  -1  -1  -4  219.35   10.70
  -1   1  -4  226.82   10.95
   1   1   4  238.97    9.32
   1  -1   4  221.62    9.05
  -1  -1  -4  210.50    9.15
  -1   1  -4  236.27    9.25
  -2  -1  -4   66.00    7.46
  -2   1  -4   63.03    6.79
   2   1   4   69.53    6.26
   2  -1   4   69.86    6.58
  -2  -1  -4   59.18    6.10
  -2   1  -4   69.39    5.86
  -3  -1  -4  829.80   23.10
  -3   1  -4  822.81   22.91
   3   1   4  795.85   22.81
   3  -1   4  862.45   22.16
  -3  -1  -4  842.69   21.93
  -3   1  -4  870.49   22.38
  -4  -1  -4    4.06    5.01
  -4   1  -4    3.79    5.12
   4   1   4    5.74    5.20
   4  -1   4    5.80    5.10
  -4  -1  -4    6.70    4.48
  -4   1  -4    7.44    5.12
  -5  -1  -4  103.97    9.00
  -5   1  -4  108.05    9.57
   5   1   4   99.97    7.39
   5  -1   4  109.55    7.35
  -5  -1  -4  108.63    7.87
  -5   1  -4  118.08    7.71
  -6  -1  -4   92.85    8.27
  -6   1  -4   98.92    8.74
   6   1   4   90.54    7.56
   6  -1   4   82.86    7.44
  -6  -1  -4   84.13    6.91
  -6   1  -4   90.83    6.67
  -7  -1  -4   74.17    7.50
  -7   1  -4   86.96    8.12
   7   1   4   77.41    7.15
   7  -1   4   71.57    7.34
  -7  -1  -4   76.52    7.39
  -7   1  -4   78.65    7.13
  -8  -1  -4   11.59    7.05
  -8   1  -4    6.32    6.93
   8   1   4    5.25    4.68
   8  -1   4    7.22    5.56
  -8  -1  -4    6.74    4.42
  -8   1  -4   19.64    6.13
  -9  -1  -4   31.71    7.50
  -9   1  -4   38.91    7.50
   9   1   4   34.43    7.86
   9  -1   4   34.95    7.62
  -9  -1  -4   36.92    6.42
  -9   1  -4   36.07    6.97
 -10   1  -4   27.32    6.84
  10   1   4   18.89    5.24
  10   1   4   14.95    8.89
  10  -1   4   25.08    7.11
 -10  -1  -4   27.53    7.47
 -10   1  -4   24.72    7.42
 -11   1  -4   54.67    7.66
  11   1   4   46.40    6.70
  11   1   4   41.87   10.61
  11  -1   4   35.65    7.15
 -11  -1  -4   29.70    7.75
 -11   1  -4   50.38    8.23
 -12   1  -4    4.67    7.30
  12   1   4    3.12    5.10
  12   1   4   -0.77    6.57
 -12  -1  -4    4.02    8.01
 -12   1  -4    5.14    7.55
  13   1   4    2.87    5.95
  13   1   4    4.63   13.28
  13  -1   4    6.63    9.74
 -13  -1  -4    7.17    7.75
 -13   1  -4   -1.17    9.26
  14   1   4    0.00    9.11
  14  -1   4    5.49    8.76
 -14  -1  -4    4.67    6.39
 -14   1  -4   10.24    9.04
  15   1   4   -3.68    9.24
  15  -1   4    0.65   11.45
 -15  -1  -4   -1.61    9.59
 -15   1  -4   -1.06    8.04
  16   1   4  -12.32   11.47
  16  -1   4    1.27    8.89
 -16  -1  -4   -1.46    9.03
 -16   1  -4    3.84    7.75
  17   1   4    9.33   13.99
  17  -1   4   16.53   11.71
 -17  -1  -4   17.61    9.81
 -17   1  -4   20.88   10.84
  18   1   4   -1.00   16.95
  18  -1   4   -0.68   13.90
 -18  -1  -4   -5.45   10.74
 -18   1  -4   -5.21   11.62
  21   2  -4   16.79   16.01
  21  -2  -4   25.86   13.03
 -21  -2   4   33.84    8.25
 -21   2   4   36.57   10.26
  20   2  -4    7.83   10.27
  20  -2  -4   12.52    9.82
 -20  -2   4    7.24    9.74
 -20   2   4    8.11   10.30
  19   2  -4    9.32   13.09
  19  -2  -4   26.73    9.03
 -19  -2   4   15.78    8.73
 -19   2   4   25.98    9.30
  18   2  -4  368.95   20.34
  18  -2  -4  383.04   21.08
 -18  -2   4  318.35   16.54
 -18   2   4  335.96   18.33
  17   2  -4    0.45    7.60
  17  -2  -4    2.61   12.09
 -17  -2   4   -3.52    9.35
 -17   2   4   -4.00    9.15
  16   2  -4   15.95    8.74
  16  -2  -4   18.51    8.62
 -16  -2   4    9.88    6.71
 -16   2   4   10.90    7.85
  15   2  -4   20.43    9.07
  15  -2  -4   11.27    9.20
 -15  -2   4    9.98    5.74
 -15   2   4   14.91    8.25
  14   2  -4  113.94   12.02
  14  -2  -4  113.24   10.99
 -14  -2   4  105.42    9.46
 -14   2   4  106.06    9.33
  13   2  -4  323.52   16.11
  13  -2  -4  300.46   15.88
 -13  -2   4  329.41   14.76
 -13   2   4  309.94   14.16
  12   2  -4  256.56   11.80
  12  -2  -4  219.87   11.75
 -12  -2   4  229.65   10.54
 -12   2   4  254.52   11.35
  11   2  -4   93.84    7.07
  11   2  -4   99.56   10.14
  11  -2  -4   94.07    9.85
 -11  -2   4  102.20    7.05
 -11   2   4  100.00    8.20
  10   2  -4 1308.34   28.12
  10   2  -4 1427.74   31.35
  10  -2  -4 1348.43   28.99
 -10  -2   4 1447.87   26.04
 -10   2   4 1268.65   23.68
   9   2  -4  668.17   18.26
   9   2  -4  750.87   20.98
   9  -2  -4  741.24   21.90
  -9   2   4  663.35   15.67
   8   2  -4   -0.91    5.57
   8   2  -4   -5.82    7.83
   8  -2  -4   -2.86    5.24
  -8  -2   4   -2.51    5.02
  -8   2   4   -0.58    4.59
   7  -2  -4  209.43    9.55
   7   2  -4  217.76    9.55
   7   2  -4  225.78   11.42
   7  -2  -4  231.60   12.14
  -7  -2   4  235.16    9.78
  -7   2   4  211.08    8.99
   6  -2  -4  257.29   10.77
   6   2  -4  272.45   10.43
   6   2  -4  279.64   11.63
   6  -2  -4  282.31   11.84
   6  -2  -4  277.11   11.72
  -6  -2   4  279.92   10.20
   5  -2  -4   34.85    5.38
   5   2  -4   37.01    6.08
   5   2  -4   36.68    5.82
   5  -2  -4   52.69    8.40
   5  -2  -4   43.96    7.08
  -5  -2   4   38.93    4.94
   4  -2  -4  196.89    9.90
   4   2  -4  190.42    9.61
   4   2  -4  201.96   10.69
   4  -2  -4  199.99   11.13
   4  -2  -4  191.59    9.40
  -4  -2   4  219.77    8.99
   3  -2  -4   -1.28    5.80
   3   2  -4    8.91    6.02
   3  -2  -4    0.35    4.87
  -3  -2   4    0.36    4.18
   3  -2  -4    0.63    5.73
  -3  -2   4    9.74    5.82
   2  -2  -4  343.41   12.74
   2   2  -4  340.52   12.92
   2  -2  -4  348.35   12.72
  -2  -2   4  369.82   12.39
   2  -2  -4  370.45   14.32
   1  -2  -4 2108.12   47.68
   1   2  -4 2086.31   46.78
  -1  -2   4 2131.92   44.31
  -1   2   4 2039.61   43.97
   1  -2  -4 2005.04   44.76
   0  -2  -4   43.11    7.14
   0   2  -4   40.38    7.32
   0  -2   4   44.20    5.44
   0   2   4   42.07    4.59
   0  -2  -4   35.21    6.31
   0  -2   4   16.92    3.48
  -1  -2  -4   95.09    7.99
  -1   2  -4   87.78    7.89
   1   2   4   97.27    6.55
   1  -2   4   96.58    7.02
  -1  -2  -4   92.05    6.49
  -1   2  -4   97.64    7.79
  -2  -2  -4  388.35   13.97
  -2   2  -4  389.15   14.54
   2   2   4  426.20   13.93
   2  -2   4  389.59   13.32
  -2  -2  -4  405.42   13.68
  -2   2  -4  426.30   13.87
  -3  -2  -4   31.92    6.51
  -3   2  -4   37.70    7.24
   3   2   4   28.12    5.00
   3  -2   4   31.38    6.58
  -3  -2  -4   36.59    6.04
  -3   2  -4   28.99    4.88
  -4  -2  -4  251.99   11.27
  -4   2  -4  253.74   11.42
   4   2   4  274.68   10.86
   4  -2   4  274.92   10.56
  -4  -2  -4  240.29    9.97
  -4   2  -4  248.20    9.54
  -5  -2  -4 1152.97   29.16
  -5   2  -4 1198.76   30.83
   5   2   4 1181.92   29.16
   5  -2   4 1175.86   28.59
  -5  -2  -4 1185.94   28.63
  -5   2  -4 1205.61   29.00
  -6  -2  -4  913.55   21.67
  -6   2  -4  885.09   21.19
   6   2   4  870.94   20.75
   6  -2   4  868.48   19.73
  -6  -2  -4  887.30   20.12
  -6   2  -4  862.99   19.77
  -7   2  -4  825.84   20.16
   7   2   4  878.06   21.39
   7  -2   4  921.06   21.33
  -7  -2  -4  843.81   19.61
  -7   2  -4  888.33   20.49
  -8   2  -4 1661.82   46.02
   8   2   4 1569.83   41.87
   8   2   4 1609.68   43.67
   8  -2   4 1579.48   43.01
  -8  -2  -4 1528.33   40.12
  -8   2  -4 1558.93   41.85
  -9   2  -4    4.34    6.65
   9   2   4   20.58    6.04
   9   2   4   23.35    7.62
   9  -2   4   18.10    7.84
  -9  -2  -4   20.15    6.76
  -9   2  -4   22.34    6.63
 -10   2  -4    6.77    5.86
  10   2   4   -2.45    5.21
  10   2   4    4.85    7.69
  10  -2   4    6.95    5.60
 -10  -2  -4    3.89    5.67
 -10   2  -4    4.59    5.72
 -11   2  -4   11.65    6.56
  11   2   4   10.36    5.40
  11   2   4   16.66    6.43
  11  -2   4   12.94    6.70
 -11  -2  -4   12.33    8.21
 -11   2  -4   12.51    5.43
 -12   2  -4   45.98    7.91
  12   2   4   44.56    6.61
  12   2   4   55.37   10.19
  12  -2   4   58.35    7.65
 -12  -2  -4   54.33    8.79
 -12   2  -4   57.11    6.71
  13   2   4    8.24    6.09
  13   2   4   -0.22    8.85
  13  -2   4    4.82   11.71
 -13  -2  -4    1.73    8.45
 -13   2  -4   10.13    6.28
  14   2   4  430.12   21.08
  14  -2   4  430.22   21.08
 -14  -2  -4  446.66   20.33
 -14   2  -4  411.66   18.28
  15   2   4    2.41   10.70
  15  -2   4    0.11   12.75
 -15  -2  -4    3.64    7.86
 -15   2  -4    6.56    8.08
  16   2   4  222.27   17.30
  16  -2   4  230.06   15.19
 -16  -2  -4  236.23   14.31
 -16   2  -4  229.66   13.21
  17   2   4  308.17   21.28
  17  -2   4  348.52   22.23
 -17  -2  -4  323.06   18.06
 -17   2  -4  296.22   19.50
  18   2   4   -0.41   13.56
  18  -2   4    0.28   13.42
 -18  -2  -4    9.39   13.92
 -18   2  -4    4.13    9.04
  21   3  -4    0.80   11.27
  21  -3  -4  -14.36   12.42
 -21  -3   4   -5.77    8.54
 -21   3   4   -1.33    8.75
  20   3  -4   -5.67   13.12
  20  -3  -4    3.02   11.62
 -20  -3   4    3.65    8.30
 -20   3   4   -0.01    8.19
  19   3  -4    4.99   13.70
  19  -3  -4   -4.36   11.55
 -19  -3   4   19.73    8.46
 -19   3   4   26.54    7.43
  18   3  -4  106.29   11.84
  18  -3  -4  110.08   13.05
 -18  -3   4  109.53   11.07
 -18   3   4  100.54   11.66
  17   3  -4   60.76   10.96
  17  -3  -4   77.76   10.07
 -17  -3   4   77.75   10.22
 -17   3   4   79.69    9.20
  16   3  -4    4.20    9.42
  16  -3  -4    1.64   10.13
 -16  -3   4   12.67    9.68
 -16   3   4    2.25    8.14
  15   3  -4   -6.61    9.89
  15  -3  -4    2.85   11.06
 -15  -3   4    7.06    9.27
 -15   3   4    2.67    6.72
  14   3  -4    6.37    7.14
  14  -3  -4    3.51    9.01
 -14  -3   4    8.90    8.00
 -14   3   4    2.59    7.48
  13   3  -4    5.37    5.20
  13   3  -4   -2.93    9.07
  13  -3  -4    4.76    6.49
 -13  -3   4    1.20    5.90
 -13   3   4    8.07    6.97
  12   3  -4   12.99    5.37
  12   3  -4   17.47    6.38
  12  -3  -4    9.91    6.55
 -12  -3   4   13.44    6.30
 -12   3   4   12.23    7.32
  11   3  -4   11.58    5.06
  11   3  -4    6.94    8.32
  11  -3  -4   14.24    8.05
 -11  -3   4    9.66    7.04
 -11   3   4   17.42    7.54
  10   3  -4   27.25    5.92
  10   3  -4   25.37    8.20
  10  -3  -4   30.30    8.72
 -10  -3   4   28.29    6.28
 -10   3   4   24.59    6.10
   9   3  -4   11.94    4.46
  -9   3   4   13.42    4.17
   9   3  -4   13.14    7.37
   9  -3  -4   12.24    8.08
  -9  -3   4   15.79    5.36
  -9   3   4    6.34    7.07
   8   3  -4  101.56    7.20
  -8   3   4  115.41    6.53
   8   3  -4  122.05    9.23
   8  -3  -4  131.18    9.15
  -8  -3   4  127.40    7.93
  -8   3   4  134.85    8.38
   7   3  -4   70.19    7.33
  -7   3   4   64.84    5.40
   7   3  -4   66.65    8.18
   7  -3  -4   67.88    7.89
   7  -3  -4   71.97    7.75
  -7  -3   4   74.66    7.03
   6   3  -4   10.01    5.22
  -6   3   4    7.07    3.78
   6   3  -4    9.78    7.10
   6  -3  -4    6.94    6.34
   6  -3  -4    5.63    5.92
  -6  -3   4   13.19    4.58
   5   3  -4  109.59    8.26
  -5   3   4  102.26    6.43
   5   3  -4  102.45    9.28
   5  -3  -4  107.28    7.93
   5  -3  -4   99.63    8.14
  -5  -3   4  100.78    6.59
   4   3  -4   32.23    5.85
   4   3  -4   31.93    7.11
   4  -3  -4   36.89    6.31
   4  -3  -4   37.76    6.69
  -4  -3   4   32.26    4.91
   3  -3  -4   -5.49    4.72
   3   3  -4   -6.72    5.59
   3  -3  -4   -0.70    4.94
  -3  -3   4    3.09    3.82
   3  -3  -4    0.57    5.36
  -3  -3   4    2.87    3.67
   2  -3  -4    9.50    5.73
   2   3  -4   13.94    4.85
   2  -3  -4    7.81    4.93
  -2  -3   4   13.61    4.71
   2  -3  -4   12.42    5.61
  -2  -3   4    3.71    3.70
   1  -3  -4   63.76    7.34
   1   3  -4   62.44    8.08
  -1  -3   4   74.20    6.29
  -1   3   4   67.60    5.73
   1  -3  -4   61.86    6.56
   0  -3  -4   33.16    5.82
   0   3  -4   21.00    5.24
   0  -3   4   25.63    5.32
   0   3   4   21.85    3.96
   0  -3  -4   27.15    5.95
  -1  -3  -4   11.62    6.05
  -1   3  -4   12.38    5.26
   1   3   4   11.34    4.16
   1  -3   4   17.08    5.85
  -1  -3  -4    8.43    5.51
  -1   3  -4    6.09    5.74
  -2  -3  -4   66.36    6.93
  -2   3  -4   68.50    8.36
   2   3   4   76.73    6.30
   2  -3   4   77.86    7.35
  -2  -3  -4   71.48    6.41
  -2   3  -4   71.04    5.96
  -3   3  -4  161.69    9.87
   3   3   4  146.97    8.64
   3  -3   4  172.14    8.54
  -3  -3  -4  168.06    8.59
  -3   3  -4  185.68    8.47
  -4   3  -4   -0.09    6.34
   4   3   4    4.30    5.19
   4   3   4    2.80    4.98
   4  -3   4    6.15    5.63
  -4  -3  -4   -1.86    4.55
  -4   3  -4    1.56    4.27
  -5   3  -4   32.09    7.72
   5   3   4   38.69    5.26
   5   3   4   34.58    5.82
   5  -3   4   30.26    5.34
  -5  -3  -4   27.74    5.60
  -5   3  -4   34.45    5.02
  -6   3  -4   44.80    6.39
   6   3   4   40.11    5.38
   6   3   4   40.72    5.52
   6  -3   4   32.76    6.48
  -6  -3  -4   40.37    5.51
  -6   3  -4   39.13    5.00
  -7   3  -4    7.14    6.29
   7   3   4   -1.90    4.65
   7   3   4    7.37    5.90
   7  -3   4    0.87    6.52
  -7  -3  -4    2.21    5.50
  -7   3  -4    3.53    5.34
  -8   3  -4  143.66    9.61
   8   3   4  141.51    8.31
   8   3   4  148.30    9.23
   8  -3   4  122.61    8.17
  -8  -3  -4  152.76    9.29
  -8   3  -4  134.66    8.52
  -9   3  -4   40.05    6.53
   9   3   4   51.37    6.36
   9   3   4   35.38    6.69
   9  -3   4   49.63    6.74
  -9  -3  -4   44.73    7.34
  -9   3  -4   44.99    6.74
 -10   3  -4    7.18    6.94
  10   3   4    0.95    3.89
  10   3   4    0.88    8.30
  10  -3   4    6.04    6.44
 -10  -3  -4    4.14    7.27
 -10   3  -4   -0.94    5.70
 -11   3  -4   59.65    9.45
  11   3   4   73.50    7.91
  11   3   4   69.25    7.62
  11  -3   4   60.94    9.89
 -11  -3  -4   55.69   10.31
 -11   3  -4   60.08    6.42
 -12   3  -4    1.28    6.81
  12   3   4   -2.76    6.29
  12   3   4    8.10    9.12
  12  -3   4    6.16    9.01
 -12  -3  -4    7.87    7.70
 -12   3  -4    1.75    6.53
  13   3   4   21.40    6.89
  13   3   4   29.53   10.73
  13  -3   4   25.57    8.27
 -13  -3  -4   25.82    7.88
 -13   3  -4   30.35    7.91
  14   3   4   -0.41   10.02
  14  -3   4    0.93   10.96
 -14  -3  -4    3.09    7.93
 -14   3  -4   -0.99    7.66
  15   3   4    3.76   10.07
  15  -3   4    3.51    8.63
 -15  -3  -4   -0.82    7.00
 -15   3  -4    2.14    8.70
  16   3   4   12.83   11.63
  16  -3   4   17.61   13.53
 -16  -3  -4   -1.99    9.82
 -16   3  -4   14.93   11.59
  17   3   4   13.71   12.92
  17  -3   4   17.87   11.62
 -17  -3  -4   17.37    8.32
 -17   3  -4   14.16    9.29
  18   3   4   18.44   13.63
  18  -3   4   18.25   15.73
 -18  -3  -4    7.87   13.28
 -18   3  -4   29.95   11.48
  21   4  -4   22.64   11.66
  21  -4  -4   10.27   10.66
 -21  -4   4   12.62   14.70
 -21   4   4   15.24   13.25
  20   4  -4    2.66   14.14
  20  -4  -4   14.21    9.41
 -20  -4   4   15.01   12.16
 -20   4   4   26.87   12.09
  19   4  -4   -3.31    9.72
  19  -4  -4    7.95    9.18
 -19  -4   4    5.97   10.60
 -19   4   4   -4.62    8.23
  18   4  -4  280.18   15.62
  18  -4  -4  304.97   16.88
 -18  -4   4  308.28   15.44
 -18   4   4  314.77   17.29
  17   4  -4   12.12   10.50
  17  -4  -4   29.57   11.94
 -17  -4   4   23.28    7.36
 -17   4   4    6.63    9.37
  16   4  -4   75.78   11.12
  16  -4  -4   74.22   11.55
 -16  -4   4   68.63    8.84
 -16   4   4   55.98   11.02
  15   4  -4   16.32    7.67
  15  -4  -4    8.28    7.95
 -15  -4   4    3.90    8.33
 -15   4   4   15.50    9.57
  14   4  -4   20.02   11.13
  14  -4  -4   34.69   11.21
 -14  -4   4   16.87    6.30
 -14   4   4   18.07    5.93
  13   4  -4    2.08    5.35
  13   4  -4   -6.93    9.64
  13  -4  -4    5.08    7.63
 -13  -4   4    9.25    7.23
 -13   4   4    5.05    6.75
  12   4  -4   34.76    6.61
  12   4  -4   38.94    7.91
  12  -4  -4   40.76    6.90
 -12  -4   4   44.30    6.56
 -12   4   4   42.11    6.88
  11   4  -4   13.06    6.29
  11   4  -4    9.28    8.85
  11  -4  -4   14.52    6.01
 -11  -4   4   19.60    5.91
 -11   4   4    7.48    7.06
  10   4  -4  395.36   16.27
  10   4  -4  440.09   18.27
  10  -4  -4  382.53   16.20
 -10  -4   4  428.47   15.78
 -10   4   4  421.18   16.17
   9   4  -4  481.27   15.55
   9   4  -4  516.11   15.71
   9  -4  -4  469.42   15.96
  -9  -4   4  492.72   15.10
  -9   4   4  495.72   14.29
   8   4  -4    5.49    4.78
  -8   4   4    3.90    3.66
   8   4  -4    9.71    7.59
   8  -4  -4    6.49    4.83
   8  -4  -4    2.40    7.32
  -8  -4   4    6.27    4.69
   7   4  -4  377.14   14.47
  -7   4   4  354.84   10.83
   7   4  -4  378.14   15.29
   7  -4  -4  373.30   13.83
   7  -4  -4  372.56   13.60
  -7  -4   4  371.46   12.19
   6   4  -4   48.05    6.85
  -6   4   4   51.58    5.47
   6   4  -4   54.06    8.43
   6  -4  -4   51.48    7.07
   6  -4  -4   57.34    7.93
  -6  -4   4   60.40    6.27
   5   4  -4    9.81    5.90
  -5   4   4    5.26    3.63
   5   4  -4    9.26    7.27
   5  -4  -4   12.43    6.61
   5  -4  -4   10.85    7.93
  -5  -4   4    9.57    4.01
   4   4  -4   76.38    6.87
  -4   4   4   74.61    6.21
   4  -4  -4   85.17    8.09
  -4  -4   4   71.17    6.02
   4  -4  -4   83.32    7.96
  -4  -4   4   72.73    6.05
   3   4  -4   46.66    6.45
  -3   4   4   50.54    5.19
   3  -4  -4   42.97    6.54
  -3  -4   4   45.21    5.99
   3  -4  -4   44.32    6.44
  -3  -4   4   44.15    5.09
   2   4  -4    3.76    5.54
  -2   4   4   -0.42    4.75
   2  -4  -4    6.16    5.30
  -2  -4   4    3.73    5.08
   2  -4  -4    4.46    5.49
  -2  -4   4    1.02    5.65
   1   4  -4   15.43    5.73
  -1   4   4   11.89    4.61
  -1  -4   4   12.66    5.33
  -1   4   4    7.88    3.44
  -1  -4   4    0.41    5.54
   1  -4  -4   15.51    6.04
   0   4  -4  162.67    9.11
   0   4   4  142.01    7.85
   0  -4   4  151.79    8.17
   0   4   4  126.96    8.12
   0  -4  -4  150.31    8.75
  -1   4  -4    3.63    5.26
   1   4   4    2.56    5.63
   1   4   4   -0.19    3.38
   1  -4   4    2.26    4.63
  -1  -4  -4    2.32    4.71
  -1   4  -4    0.49    3.16
  -2   4  -4  429.79   15.82
   2   4   4  398.52   13.21
   2   4   4  380.59   16.01
   2  -4   4  429.68   14.05
  -2  -4  -4  441.60   15.28
  -2   4  -4  432.80   14.06
  -3   4  -4  116.92    8.36
   3   4   4  122.83    6.62
   3   4   4  107.06    6.89
   3  -4   4  115.81    7.44
  -3  -4  -4  122.94    8.45
  -3   4  -4  122.77    7.10
  -4   4  -4   84.25    7.92
   4   4   4   89.45    7.14
   4   4   4   88.40    6.27
   4  -4   4   82.28    7.31
  -4  -4  -4   82.17    7.49
  -4   4  -4   89.73    6.41
  -5   4  -4  543.02   16.50
   5   4   4  593.79   14.81
   5   4   4  588.64   17.32
   5  -4   4  597.52   15.47
  -5  -4  -4  574.75   14.64
  -5   4  -4  506.66   14.15
  -6   4  -4  126.72    8.93
   6   4   4  117.06    7.86
   6   4   4  132.16    7.98
   6  -4   4  119.72    7.53
  -6  -4  -4  120.35    8.44
  -6   4  -4  128.83    7.61
  -7   4  -4   24.66    7.00
   7   4   4   21.20    5.14
   7   4   4   23.73    5.78
   7  -4   4   26.69    5.85
  -7  -4  -4   35.13    7.01
  -7   4  -4   25.91    6.19
  -8   4  -4  566.21   20.02
   8   4   4  573.70   18.70
   8   4   4  570.53   20.61
   8  -4   4  553.86   18.37
  -8  -4  -4  559.73   18.92
  -8   4  -4  497.24   18.55
  -9   4  -4   64.29    7.63
   9   4   4   83.35    7.62
   9   4   4   75.64    7.99
   9  -4   4   85.67    9.03
  -9  -4  -4   69.85    8.88
  -9   4  -4   78.08    7.11
 -10   4  -4   46.13    8.20
  10   4   4   50.66    6.78
  10   4   4   46.44    8.39
  10  -4   4   43.14    7.40
 -10  -4  -4   52.59    7.75
 -10   4  -4   59.18    7.18
 -11   4  -4   44.64    9.10
  11   4   4   43.16    7.69
  11   4   4   43.70    8.97
  11  -4   4   35.87    6.93
 -11  -4  -4   43.05    9.04
 -11   4  -4   39.42    6.67
 -12   4  -4    4.31    5.82
  12   4   4   -1.36    8.37
  12   4   4   -3.75    8.91
  12  -4   4    1.58    7.40
 -12  -4  -4   -0.29    6.10
 -12   4  -4    1.15    7.05
  13   4   4    2.06    7.27
  13   4   4  -14.05    8.26
  13  -4   4    4.06    8.88
 -13  -4  -4    1.84    9.03
 -13   4  -4    3.43    6.92
  14   4   4  320.92   20.15
  14  -4   4  314.88   18.50
 -14  -4  -4  345.45   17.30
 -14   4  -4  229.61   13.28
  15   4   4   11.73   10.45
  15  -4   4   13.20    8.23
 -15  -4  -4   18.16    9.85
 -15   4  -4   17.91    9.58
  16   4   4   44.98   10.68
  16  -4   4   47.37   11.01
 -16  -4  -4   30.90   11.75
 -16   4  -4   53.12    9.74
  17   4   4  269.37   20.39
  17  -4   4  296.03   19.22
 -17  -4  -4  259.78   16.10
 -17   4  -4  267.01   17.34
 -18  -4  -4   22.15   11.47
 -18   4  -4   16.38    9.66
  21   5  -4   42.05   17.00
  21  -5  -4   32.04   13.75
 -21  -5   4   36.00   10.15
 -21   5   4   35.96   12.04
  20   5  -4   15.04   14.18
  20  -5  -4    6.41   12.55
 -20  -5   4    0.83    9.50
 -20   5   4    7.46    8.24
  19   5  -4   23.29   13.89
  19  -5  -4   14.52   10.22
 -19  -5   4   27.31   10.73
 -19   5   4    5.51   11.28
  18   5  -4   74.88   12.59
  18  -5  -4   60.31   11.58
 -18  -5   4   87.78   11.92
 -18   5   4   78.14    8.24
  17   5  -4  197.71   17.98
  17  -5  -4  208.18   15.10
 -17  -5   4  223.44   13.61
 -17   5   4  195.60   14.62
  16   5  -4   -1.70    7.82
  16  -5  -4   -6.87    9.78
 -16  -5   4   -3.77    9.92
 -16   5   4    5.22    9.44
  15   5  -4    6.26   11.12
  15  -5  -4   14.52   11.99
 -15  -5   4    5.67    7.67
 -15   5   4    9.37    6.64
  14   5  -4   77.72    8.68
  14   5  -4   85.83   11.88
  14  -5  -4   87.66    9.32
 -14  -5   4   78.01    7.53
 -14   5   4   86.76   10.05
  13   5  -4   61.54    7.58
  13   5  -4   74.48   10.53
  13  -5  -4   79.44   11.31
 -13  -5   4   50.71    6.54
 -13   5   4   59.42    9.20
  12   5  -4    5.07    5.97
  12   5  -4    0.71    7.61
  12  -5  -4    2.91    9.05
 -12  -5   4    9.62    6.02
 -12   5   4    5.00    5.41
  11   5  -4    3.41    7.23
  11   5  -4    5.09    8.01
  11  -5  -4    7.15    6.82
 -11  -5   4    6.38    5.12
 -11   5   4    8.73    6.75
  10   5  -4    5.11    6.58
 -10   5   4   -1.99    3.63
  10   5  -4    1.73    8.09
  10  -5  -4   -1.30    6.74
 -10  -5   4    8.96    5.98
 -10   5   4    5.43    5.12
   9   5  -4   59.74    7.81
  -9   5   4   41.88    5.53
   9   5  -4   65.85    7.30
   9  -5  -4   52.42    8.17
  -9  -5   4   60.00    6.40
   8   5  -4  312.27   12.43
  -8   5   4  298.18   10.73
   8   5  -4  354.32   14.67
   8  -5  -4  331.46   13.69
   8  -5  -4  326.76   13.46
  -8  -5   4  338.15   11.85
   7   5  -4  341.92   12.68
  -7   5   4  347.55   11.38
   7   5  -4  343.33   13.22
   7  -5  -4  339.54   13.17
   7  -5  -4  349.90   13.02
  -7  -5   4  334.51   11.74
   6   5  -4  155.28    8.72
  -6   5   4  152.57    7.88
   6   5  -4  169.36    9.59
   6  -5  -4  168.77   10.01
   6  -5  -4  170.72    9.54
  -6  -5   4  157.23    9.42
   5   5  -4   18.07    5.54
  -5   5   4   20.71    5.60
   5  -5  -4   14.23    5.32
  -5  -5   4   11.72    4.84
   5  -5  -4   17.89    6.74
  -5  -5   4   10.67    4.85
   4   5  -4   24.80    6.22
  -4   5   4   21.12    4.54
   4  -5  -4   24.57    6.14
  -4  -5   4   24.27    6.02
   4  -5  -4   28.03    6.84
  -4  -5   4   23.14    5.00
   3   5  -4   -4.03    6.27
  -3   5   4   -2.89    4.35
   3  -5  -4    2.11    5.01
  -3  -5   4   -2.12    6.24
   3  -5  -4    0.01    6.85
  -3  -5   4   -1.54    4.12
   2   5  -4   10.43    6.14
  -2   5   4   10.54    5.56
   2  -5  -4    6.55    4.41
  -2  -5   4    4.99    4.66
   2  -5  -4   10.18    6.15
  -2  -5   4    7.17    3.62
   1   5  -4   25.66    6.03
  -1   5   4   21.13    5.88
  -1  -5   4   28.95    5.56
  -1  -5   4   16.61    5.28
   1  -5  -4   32.80    7.60
   0   5  -4   14.13    6.58
   0   5   4   17.45    4.60
   0   5   4   12.86    4.05
   0  -5   4   13.94    5.11
   0  -5   4    6.04    4.67
   0  -5  -4   15.19    6.84
  -1   5  -4  124.85    8.74
   1   5   4  129.65    7.45
   1  -5   4  119.86    7.70
  -1  -5  -4  118.87    7.53
  -1   5  -4  117.51    6.88
  -2   5  -4  203.08   10.42
   2   5   4  204.38    8.72
   2  -5   4  196.28    8.55
  -2  -5  -4  214.29    9.75
  -2   5  -4  199.81    8.23
  -3   5  -4  116.07    8.19
   3   5   4  125.14    7.73
   3   5   4  102.58    7.03
   3  -5   4  140.84    8.98
  -3  -5  -4  136.72    8.80
  -3   5  -4  131.29    7.41
  -4   5  -4  238.56   10.83
   4   5   4  233.63    9.95
   4  -5   4  231.79   10.05
  -4  -5  -4  249.84   10.36
  -4   5  -4  253.77   10.01
  -5   5  -4    2.37    5.14
   5   5   4    9.74    3.97
   5   5   4    5.73    4.57
   5  -5   4   13.85    5.15
  -5  -5  -4    2.00    5.23
  -5   5  -4   10.62    4.37
  -6   5  -4   33.99    6.93
   6   5   4   20.38    5.04
   6   5   4   12.46    4.21
   6  -5   4   27.75    6.92
  -6  -5  -4   24.70    6.21
  -6   5  -4   28.68    5.83
  -7   5  -4    0.43    7.39
   7   5   4   -0.48    5.36
   7   5   4   -0.92    5.24
   7  -5   4    1.79    7.22
  -7  -5  -4   -2.36    6.37
  -7   5  -4   -1.97    6.31
  -8   5  -4  106.82    9.09
   8   5   4  120.03    8.49
   8   5   4  114.69    8.68
   8  -5   4  120.13    9.28
  -8  -5  -4  117.59    9.58
  -8   5  -4  103.50    7.56
  -9   5  -4    7.82    6.72
   9   5   4    7.53    5.82
   9   5   4    4.76    5.67
   9  -5   4   15.10    8.73
  -9  -5  -4    8.15    8.55
  -9   5  -4   16.63    5.93
 -10   5  -4  109.67   10.30
  10   5   4  111.21    8.07
  10   5   4  119.42   10.54
  10  -5   4  109.04    8.73
 -10  -5  -4  125.30   10.59
 -10   5  -4  128.06    8.68
 -11   5  -4    5.05    7.11
  11   5   4   12.53    6.64
  11   5   4    4.39    7.35
  11  -5   4    3.14    6.44
 -11  -5  -4   10.11    8.08
 -11   5  -4    7.54    6.62
 -12   5  -4   71.62    8.71
  12   5   4  100.81    8.96
  12   5   4   99.00   10.08
  12  -5   4   86.35    8.52
 -12  -5  -4  109.97   11.65
 -12   5  -4   88.48    9.62
  13   5   4   15.70    6.37
  13   5   4   20.49    8.89
  13  -5   4   24.19   10.33
 -13  -5  -4   13.20    7.49
 -13   5  -4   22.99    7.44
  14   5   4   31.36    8.64
  14   5   4   32.54    8.50
  14  -5   4   39.35   12.29
 -14  -5  -4   32.38   11.13
 -14   5  -4   24.72    6.87
  15   5   4   76.94   12.68
  15  -5   4   87.23   10.55
 -15  -5  -4  110.63   14.31
 -15   5  -4   87.94    9.39
  16   5   4    0.04    9.65
  16  -5   4   14.22   10.86
 -16  -5  -4   16.88   13.25
 -16   5  -4   19.33   10.00
  17  -5   4    3.67   11.53
 -17  -5  -4    8.32    9.42
 -17   5  -4    2.63    8.99
  20   6  -4    6.45   15.10
  20  -6  -4   14.90   11.02
 -20  -6   4   15.95    8.88
 -20   6   4    1.53    8.61
  19   6  -4   25.12   13.12
  19  -6  -4   24.95   12.74
 -19  -6   4   29.09   10.28
 -19   6   4   21.63    8.25
  18   6  -4  221.34   14.53
  18  -6  -4  272.44   18.76
 -18  -6   4  254.72   16.61
 -18   6   4  279.44   16.06
  17   6  -4    1.67    8.91
  17  -6  -4   -4.81    9.06
 -17  -6   4    7.49    9.59
 -17   6   4    1.42    7.43
  16   6  -4   -9.54   12.24
  16  -6  -4    7.02   10.07
 -16  -6   4   -5.82    8.30
 -16   6   4   -3.25    7.30
  15   6  -4   39.68   14.50
  15  -6  -4   58.26   13.09
 -15  -6   4   45.62    6.84
 -15   6   4   46.50    7.00
  14   6  -4   13.45    7.61
  14   6  -4    0.88   12.37
  14  -6  -4   -1.87   10.01
 -14  -6   4   12.51    8.02
 -14   6   4    9.35    6.63
  13   6  -4  546.72   23.09
  13   6  -4  550.94   23.07
  13  -6  -4  514.69   22.99
 -13  -6   4  575.41   22.63
 -13   6   4  504.88   21.20
  12   6  -4   52.66    8.35
  12   6  -4   55.38    9.09
  12  -6  -4   41.80    9.22
 -12  -6   4   46.90    8.01
 -12   6   4   52.68    6.75
  11   6  -4    2.31    4.84
 -11   6   4   -3.13    5.33
  11   6  -4    7.49    7.61
  11  -6  -4   -7.80    8.21
 -11  -6   4   -0.38    6.79
 -11   6   4    6.34    6.13
  10   6  -4  209.14   10.82
 -10   6   4  194.88   10.40
  10   6  -4  204.46   12.23
  10  -6  -4  206.94   12.51
 -10  -6   4  231.06   11.54
 -10   6   4  201.29    9.36
   9   6  -4  826.99   27.57
  -9   6   4  746.38   31.81
   9   6  -4  826.62   26.41
   9  -6  -4  800.95   26.43
   9  -6  -4  839.81   29.10
  -9  -6   4  885.29   27.38
   8   6  -4    3.75    6.05
  -8   6   4   -3.25    4.00
   8   6  -4    4.84    6.82
   8  -6  -4    0.28    7.47
   8  -6  -4   -2.04    9.22
  -8  -6   4    5.12    5.56
   7   6  -4   65.16    8.18
  -7   6   4   57.07    5.57
   7   6  -4   73.61    8.64
   7  -6  -4   53.86    7.49
   7  -6  -4   53.10    8.31
  -7  -6   4   52.30    6.50
   6   6  -4    9.00    6.14
  -6   6   4   10.27    4.47
   6  -6  -4    6.72    4.84
   6  -6  -4   10.17    7.70
  -6  -6   4    7.15    5.08
   5   6  -4   -0.73    6.66
  -5   6   4    1.61    4.40
   5  -6  -4   -2.90    4.18
  -5  -6   4    2.78    5.13
   5  -6  -4   -0.69    7.22
  -5  -6   4    3.14    4.22
   4   6  -4  122.52    8.70
  -4   6   4  128.69    7.40
   4  -6  -4  115.69    8.71
  -4  -6   4  126.59    8.06
   4  -6  -4  119.93    9.35
  -4  -6   4  124.53    8.12
   3   6  -4   63.35    7.09
  -3   6   4   63.86    5.67
   3  -6  -4   54.77    6.79
  -3  -6   4   55.03    5.64
   3  -6  -4   72.45    7.98
  -3  -6   4   56.12    5.62
   2   6  -4  170.69    9.24
  -2   6   4  176.60    8.68
   2  -6  -4  141.46    9.06
  -2  -6   4  185.31    8.48
   2  -6  -4  160.09    9.37
  -2  -6   4  153.43    9.03
   1   6  -4 1614.03   39.44
  -1   6   4 1562.87   37.41
  -1  -6   4 1640.84   38.56
  -1  -6   4 1594.46   48.04
   1  -6  -4 1550.33   36.93
   0   6  -4  358.94   13.48
   0   6   4  383.66   13.74
   0  -6   4  360.40   11.20
   0  -6  -4  341.29   12.00
  -1   6  -4   -3.34    6.56
   1   6   4   -1.53    5.27
   1  -6   4   -0.94    5.20
   1  -6   4   -0.80    4.74
  -1  -6  -4    0.44    7.18
  -2   6  -4    1.15    6.30
   2   6   4    2.04    3.81
   2  -6   4    0.55    5.56
  -2  -6  -4    1.46    6.04
  -2   6  -4    1.39    3.82
  -3   6  -4    2.96    6.97
   3   6   4    8.15    4.93
   3  -6   4    6.77    5.90
  -3  -6  -4    2.53    5.84
  -3   6  -4    1.56    3.89
  -4   6  -4   68.61    7.66
   4   6   4   67.13    7.60
   4   6   4   39.44    6.54
   4  -6   4   76.18    7.83
  -4  -6  -4   76.23    7.19
  -4   6  -4   67.66    5.82
  -5   6  -4  738.76   23.73
   5   6   4  805.35   24.26
   5  -6   4  784.98   25.30
  -5  -6  -4  813.88   25.19
  -5   6  -4  646.13   29.47
  -6   6  -4  115.11    9.03
   6   6   4  115.80    8.20
   6   6   4   99.06    8.70
   6  -6   4   99.21    8.26
  -6  -6  -4  129.14    8.51
  -6   6  -4   98.18    7.93
  -7   6  -4  229.96   11.46
   7   6   4  258.05   10.41
   7   6   4  211.06   11.92
   7  -6   4  233.20   11.29
  -7  -6  -4  251.00   11.08
  -7   6  -4  240.82   10.72
  -8   6  -4  639.79   23.74
   8   6   4  634.33   21.90
   8   6   4  574.49   23.39
   8  -6   4  596.53   20.00
  -8  -6  -4  611.75   20.86
  -8   6  -4  633.77   22.38
  -9   6  -4  156.12   10.53
   9   6   4  141.38    7.82
   9   6   4  144.48   10.55
   9  -6   4  159.69   10.63
  -9  -6  -4  175.81   11.03
  -9   6  -4  167.13    9.54
 -10   6  -4    1.56    6.70
  10   6   4    4.16    6.70
  10   6   4    4.43    7.46
  10  -6   4    0.04    8.57
 -10  -6  -4    1.02    5.73
 -10   6  -4   -4.62    6.50
 -11   6  -4    4.73    6.64
  11   6   4    3.64    6.53
  11   6   4    8.81    7.72
  11  -6   4   -1.13    8.94
 -11  -6  -4   -0.60    7.07
 -11   6  -4   -0.10    5.46
  12   6   4    9.55    6.01
  12   6   4    2.66    7.82
  12  -6   4   -3.22    9.90
 -12  -6  -4    0.82    6.22
 -12   6  -4   -2.92    7.54
  13   6   4   14.67    7.67
  13   6   4   -1.20    9.30
  13  -6   4   -1.36    8.66
 -13  -6  -4   23.67   10.74
 -13   6  -4    8.41    7.92
  14   6   4  254.46   14.55
  14   6   4  222.85   14.33
  14  -6   4  280.82   15.68
 -14  -6  -4  294.13   15.26
 -14   6  -4  296.47   14.06
  15  -6   4   -9.18    7.58
 -15  -6  -4    1.66    7.82
 -15   6  -4   12.61    8.63
  16  -6   4   20.22   12.65
 -16  -6  -4   24.38   11.11
 -16   6  -4    8.11    8.47
  17  -6   4   91.97   11.66
 -17  -6  -4  109.81   13.54
 -17   6  -4   76.57   10.55
  20   7  -4  -12.53   12.04
  20  -7  -4   -2.26   12.86
 -20  -7   4    9.09   12.31
 -20   7   4   -6.40   10.62
  19   7  -4  118.39   14.31
  19  -7  -4  195.23   17.80
 -19  -7   4  148.74   12.63
 -19   7   4  155.72   13.50
  18   7  -4  234.58   22.67
  18  -7  -4  253.08   18.98
 -18  -7   4  262.61   15.93
 -18   7   4  245.38   18.23
  17   7  -4  408.86   22.38
  17  -7  -4  417.83   25.41
 -17  -7   4  426.15   21.83
 -17   7   4  342.08   21.65
  16   7  -4   93.68   14.25
  16  -7  -4   92.68   14.71
 -16  -7   4   86.42    9.83
 -16   7   4   73.89   10.60
  15   7  -4   16.48    9.13
  15   7  -4   23.96   12.86
  15  -7  -4   15.52   10.64
 -15  -7   4   14.55    6.63
 -15   7   4    1.75    7.19
  14   7  -4  215.57   12.80
  14  -7  -4  218.63   13.35
 -14  -7   4  210.67   12.06
 -14   7   4  248.26   13.82
  13   7  -4  214.15   16.82
  13   7  -4  199.82   16.81
  13  -7  -4  205.05   16.99
 -13  -7   4  178.34   13.15
 -13   7   4  201.40   14.13
  12   7  -4  228.40   14.29
  12   7  -4  226.26   15.16
  12  -7  -4  237.86   16.31
 -12  -7   4  206.06   12.23
 -12   7   4  227.74   13.35
  11   7  -4   45.03    6.58
 -11   7   4   20.91    6.34
  11   7  -4   63.31    7.95
  11  -7  -4   63.26    9.53
 -11  -7   4   52.58    8.13
 -11   7   4   49.33    9.02
  10   7  -4  271.71   13.81
 -10   7   4  221.37   13.08
  10   7  -4  275.77   15.84
  10  -7  -4  284.07   15.00
  10  -7  -4  261.79   14.55
 -10  -7   4  244.86   13.04
   9   7  -4  279.52   12.93
  -9   7   4  258.82   11.26
   9   7  -4  283.27   13.09
   9  -7  -4  270.39   12.40
   9  -7  -4  270.65   12.13
  -9  -7   4  261.93   12.78
   8   7  -4 1172.49   36.35
  -8   7   4 1164.67   36.58
   8   7  -4 1207.79   35.22
   8  -7  -4 1155.40   34.58
   8  -7  -4 1197.50   35.91
  -8  -7   4 1232.51   34.71
   7   7  -4  655.99   21.50
  -7   7   4  788.29   26.67
   7  -7  -4  739.02   25.22
  -7  -7   4  650.37   20.23
   7  -7  -4  773.63   26.43
  -7  -7   4  826.21   26.26
   6   7  -4   -0.74    6.50
  -6   7   4    0.94    5.13
   6  -7  -4    0.36    4.75
  -6  -7   4    1.09    4.05
   6  -7  -4    2.27    6.29
  -6  -7   4   -3.47    4.91
   5   7  -4   19.59    6.87
  -5   7   4   31.63    5.70
   5  -7  -4   21.31    5.82
  -5  -7   4   29.76    5.74
   5  -7  -4   32.44    7.67
  -5  -7   4   24.69    4.94
   4   7  -4  484.75   14.99
  -4   7   4  500.14   14.49
   4  -7  -4  478.08   16.49
  -4  -7   4  494.64   15.46
   4  -7  -4  513.92   17.07
  -4  -7   4  417.28   18.14
   3   7  -4   50.70    5.84
  -3   7   4   63.37    7.28
   3  -7  -4   52.11    6.49
  -3  -7   4   50.73    6.15
   3  -7  -4   55.27    8.80
  -3  -7   4   52.22    5.79
   2   7  -4   70.40    8.10
  -2   7   4   74.24    6.18
   2  -7  -4   58.74    6.81
  -2  -7   4   76.68    7.18
   2  -7  -4   75.03    8.65
  -2  -7   4   68.73    6.67
   1   7  -4  151.98    9.57
  -1   7   4  146.23    8.24
  -1  -7   4  128.03    8.36
  -1  -7   4  106.94    9.77
   1  -7  -4  138.84    9.33
   0   7  -4   -1.60    4.12
   0   7   4    1.34    4.20
   0  -7   4   -1.52    6.01
   0  -7   4   -0.24    5.35
   0  -7  -4   -0.63    5.78
  -1   7  -4   87.68    7.72
   1   7   4   91.59    7.72
   1  -7   4   83.34    7.00
   1  -7   4   71.81    7.93
  -1  -7  -4   82.59    6.85
  -2   7  -4  111.41    8.08
   2   7   4  104.37    7.50
   2  -7   4  116.76    7.81
  -2  -7  -4  118.78    7.89
  -3   7  -4  151.33    9.38
   3   7   4  161.00    8.83
   3  -7   4  155.12    9.49
  -3  -7  -4  156.96   10.19
  -3   7  -4  154.89    8.49
  -4   7  -4   -1.79    6.26
   4   7   4    1.92    6.19
   4  -7   4    4.62    6.27
  -4  -7  -4    3.12    6.58
  -4   7  -4    5.65    4.26
  -5   7  -4  169.93   10.21
   5   7   4  176.66    8.17
   5  -7   4  167.66    9.76
  -5  -7  -4  186.73    9.69
  -5   7  -4  180.07    8.79
  -6   7  -4   10.79    9.24
   6   7   4   17.11    7.49
   6  -7   4   14.99    8.37
  -6  -7  -4   24.25    6.57
  -6   7  -4   14.28    5.40
  -7   7  -4    2.49    8.37
   7   7   4    4.20    6.15
   7  -7   4    2.74    6.69
  -7  -7  -4   -2.88    6.67
  -7   7  -4    3.56    5.06
  -8   7  -4   -8.46    9.32
   8   7   4   11.06    8.67
   8   7   4    1.09    5.97
   8  -7   4    4.55    7.56
  -8  -7  -4    7.89    7.58
  -8   7  -4   14.52    6.90
  -9   7  -4    0.79    6.71
   9   7   4   -1.41    7.18
   9   7   4    1.57    6.51
   9  -7   4    9.19    6.57
  -9  -7  -4   13.68    7.56
  -9   7  -4    6.70    7.81
 -10   7  -4   26.11    7.93
  10   7   4   20.40    6.91
  10   7   4   17.50    7.08
  10  -7   4   22.84    7.35
 -10  -7  -4   17.49    7.15
 -10   7  -4   15.34    6.98
 -11   7  -4   43.90    8.87
  11   7   4   53.89    9.09
  11   7   4   31.39    8.09
  11  -7   4   52.26    7.78
 -11  -7  -4   24.40    9.35
 -11   7  -4   45.69    8.48
  12   7   4   11.46    8.59
  12  -7   4   20.74    7.63
 -12  -7  -4   22.12   11.11
 -12   7  -4   17.36    7.66
  13   7   4   36.19    8.12
  13  -7   4   52.72   11.02
 -13  -7  -4   34.04    8.50
 -13   7  -4   46.55   10.00
  14   7   4   34.73    9.64
  14  -7   4   28.08    8.84
 -14  -7  -4   45.38    9.87
 -14   7  -4   34.98   10.99
  15  -7   4  107.71   12.79
 -15  -7  -4  118.25   11.02
 -15   7  -4   97.27   11.29
  16  -7   4   34.54    9.36
 -16  -7  -4   32.06   12.76
 -16   7  -4    6.53   10.39
  19   8  -4   66.62   11.96
  19  -8  -4   91.13   18.16
 -19  -8   4   49.66    9.62
 -19   8   4   67.01   16.60
  18   8  -4  226.20   19.45
  18  -8  -4  331.31   22.98
 -18  -8   4  275.72   17.43
 -18   8   4  309.06   19.70
  17   8  -4   -0.23    9.92
  17  -8  -4  -17.06   16.72
 -17  -8   4   -3.00    7.75
 -17   8   4   -9.95    7.76
  16   8  -4    2.70    8.36
  16  -8  -4    8.25   12.89
 -16  -8   4   -1.33    8.00
 -16   8   4    3.14    7.23
  15   8  -4   20.24    7.95
  15   8  -4   29.49    8.79
  15  -8  -4   44.23    9.79
 -15  -8   4   48.05    9.58
 -15   8   4   23.33    8.48
  14   8  -4    3.47    9.22
  14   8  -4   -3.63   10.11
  14  -8  -4   -1.58    9.28
 -14  -8   4   -3.17    8.30
 -14   8   4   -2.04    9.89
  13   8  -4  102.78   10.31
  13   8  -4   77.47   10.72
  13  -8  -4  110.21   12.63
 -13  -8   4  103.88   10.80
 -13   8   4   95.32    8.77
  12   8  -4  108.30   10.11
  12   8  -4   81.16   11.99
  12  -8  -4   82.77    9.15
 -12  -8   4   92.34    9.30
 -12   8   4  111.41   11.13
  11   8  -4    5.31    5.31
 -11   8   4   -1.27    5.51
  11   8  -4   -3.21    6.44
  11  -8  -4   -4.66    8.45
 -11  -8   4    0.03    6.23
 -11   8   4   -1.09    8.94
  10   8  -4  568.66   18.52
 -10   8   4  559.58   18.79
  10   8  -4  605.82   19.02
  10  -8  -4  554.25   19.29
  10  -8  -4  604.21   21.96
 -10  -8   4  502.39   16.49
   9   8  -4  623.79   23.15
  -9   8   4  608.96   22.95
   9   8  -4  682.54   25.73
   9  -8  -4  644.70   25.22
   9  -8  -4  677.37   23.76
  -9  -8   4  668.05   23.35
   8   8  -4   -1.66    7.22
  -8   8   4    5.33    4.73
   8  -8  -4    3.60    6.98
  -8  -8   4   -0.40    5.31
   8  -8  -4    7.45    8.53
  -8  -8   4    0.81    6.12
   7   8  -4    5.14    7.67
  -7   8   4    0.74    5.41
   7  -8  -4    2.72    7.21
  -7  -8   4    4.15    5.07
   7  -8  -4    3.02    9.15
  -7  -8   4    5.09    5.74
   6   8  -4   28.49    6.81
  -6   8   4   32.17    6.28
   6  -8  -4   33.81    7.26
  -6  -8   4   28.13    5.07
   6  -8  -4   25.62    8.31
  -6  -8   4   27.01    6.59
   5   8  -4   23.86    6.62
  -5   8   4   28.55    5.44
   5  -8  -4   21.21    6.46
  -5  -8   4   27.31    6.02
   5  -8  -4   20.41    8.98
  -5  -8   4   28.64    6.61
   4   8  -4  766.46   25.11
  -4   8   4  753.98   23.48
   4  -8  -4  718.11   25.96
  -4  -8   4  807.06   26.44
   4  -8  -4  804.39   27.01
  -4  -8   4  719.90   24.15
   3   8  -4  182.69   10.16
  -3   8   4  209.41    9.68
   3  -8  -4  170.44    9.68
  -3  -8   4  186.93    9.45
   3  -8  -4  176.18   11.10
  -3  -8   4  143.08    8.75
   2   8  -4  184.96    9.58
  -2   8   4  178.91   10.08
  -2  -8   4  157.16    7.74
   2  -8  -4  188.50   11.22
  -2  -8   4  155.60    9.39
   1   8  -4  641.47   23.04
  -1   8   4  630.44   20.59
  -1  -8   4  618.66   20.94
   1  -8  -4  599.35   21.45
   0   8  -4  803.74   26.04
   0   8   4  808.03   24.91
   0  -8   4  731.34   23.26
   0  -8   4  751.27   33.91
   0  -8  -4  777.66   24.47
  -1   8  -4    8.62    7.00
   1   8   4   18.97    5.10
   1  -8   4   10.46    5.28
   1  -8   4    6.30    6.08
  -1  -8  -4   17.65    7.50
  -2   8  -4    6.57    7.35
   2   8   4    5.01    6.69
   2  -8   4    4.95    6.17
   2  -8   4    5.65    5.89
  -2  -8  -4    5.77    8.12
  -3   8  -4   13.56    7.63
   3   8   4    0.10    7.60
   3  -8   4    6.91    8.19
   3  -8   4   12.26    7.71
  -3  -8  -4    9.06    8.94
  -4   8  -4    1.85    7.14
   4   8   4   -2.01    7.42
   4  -8   4    1.58    5.75
  -4  -8  -4    5.09    7.32
  -4   8  -4   -0.92    5.20
  -5   8  -4  266.97   15.11
   5   8   4  280.09   12.35
   5  -8   4  265.06   13.04
  -5  -8  -4  250.95   12.68
  -5   8  -4  218.26   12.23
  -6   8  -4  126.30    9.74
   6   8   4  122.62    9.59
   6  -8   4  107.53    7.76
  -6  -8  -4  114.49    9.51
  -6   8  -4   73.88    6.61
  -7   8  -4   89.82    7.99
   7   8   4   86.99    7.96
   7  -8   4  103.86   10.34
  -7  -8  -4   97.00    7.73
  -7   8  -4   74.00    6.90
  -8   8  -4  253.90   15.41
   8   8   4  256.25   13.77
   8  -8   4  263.75   13.34
  -8  -8  -4  252.16   13.29
  -8   8  -4  258.47   13.50
  -9   8  -4  158.28   10.27
   9   8   4  155.77   10.01
   9  -8   4  149.57    9.62
  -9  -8  -4  137.10    9.41
  -9   8  -4  152.43    9.56
 -10   8  -4   32.02    8.93
  10   8   4   26.68    8.93
  10  -8   4   41.53    7.83
 -10  -8  -4   47.12    9.04
 -10   8  -4   35.49    6.62
 -11   8  -4    2.86    9.72
  11   8   4   -2.95    5.95
  11  -8   4   -0.29    6.77
 -11  -8  -4   -1.91    7.58
 -11   8  -4    3.75    5.53
  12   8   4    6.93    9.03
  12  -8   4   12.59   10.89
 -12  -8  -4    3.22    9.01
 -12   8  -4    5.36    8.47
  13   8   4   -1.67    8.48
  13  -8   4   12.35   10.03
 -13  -8  -4    6.45    7.86
 -13   8  -4   -5.12    6.36
  14   8   4  115.45   13.35
  14  -8   4  103.57   10.33
 -14  -8  -4  106.45   12.39
 -14   8  -4  125.46   12.26
  15  -8   4   17.27    9.79
 -15  -8  -4   16.31    8.77
 -15   8  -4   23.15   12.15
  16  -8   4   76.42   12.95
 -16  -8  -4   63.64   11.00
  18   9  -4   92.81   14.68
  18  -9  -4  122.38   14.01
 -18  -9   4  100.42   10.37
 -18   9   4  117.08   12.33
  17   9  -4  163.30   17.13
  17  -9  -4  227.67   20.04
 -17  -9   4  187.21   15.59
 -17   9   4  218.02   14.89
  16   9  -4   47.29   12.95
  16  -9  -4   57.99   11.98
 -16  -9   4   46.89   11.29
 -16   9   4   56.53   10.75
  15   9  -4    9.89   10.24
  15   9  -4   -4.60   12.58
  15  -9  -4   -6.80   12.17
 -15  -9   4    6.02    8.01
 -15   9   4    0.15    7.47
  14   9  -4   62.15   10.94
  14   9  -4   37.04    9.36
  14  -9  -4   49.54   14.05
 -14  -9   4   46.45    7.72
 -14   9   4   30.52    8.39
  13   9  -4   95.82   11.71
  13   9  -4   89.51   11.31
  13  -9  -4  105.76   10.15
 -13  -9   4   77.63   11.37
 -13   9   4  115.00   10.59
  12   9  -4   19.82    9.55
  12   9  -4   21.72   11.62
  12  -9  -4   16.83    9.63
 -12  -9   4   18.25    8.06
 -12   9   4    8.80    6.19
  11   9  -4   64.66    8.92
 -11   9   4   16.30    7.41
  11   9  -4   42.11    8.76
  11  -9  -4   41.22    7.50
  11  -9  -4   57.06   11.60
 -11  -9   4   46.44    8.92
  10   9  -4   56.15    7.81
 -10   9   4   85.25   10.00
  10   9  -4  107.76    9.71
  10  -9  -4  103.42   10.09
  10  -9  -4  126.17   11.26
 -10  -9   4   99.03    9.55
   9   9  -4  247.40   15.49
  -9   9   4  218.01   13.06
   9  -9  -4  240.65   14.49
  -9  -9   4  194.45   12.75
   9  -9  -4  236.14   15.91
  -9  -9   4  250.46   13.73
  -8   9   4  449.88   16.02
   8  -9  -4  367.83   19.51
   8  -9  -4  465.84   18.77
  -8  -9   4  404.87   16.69
   7   9  -4  215.11   11.75
  -7   9   4  201.30   10.82
   7  -9  -4  187.17   10.42
  -7  -9   4  202.22   10.29
   7  -9  -4  232.07   14.10
  -7  -9   4  186.74   10.81
   6   9  -4   -3.27    7.94
  -6   9   4    7.09    5.63
   6  -9  -4   -0.54    6.19
  -6  -9   4    5.71    5.57
   6  -9  -4   10.59    7.19
  -6  -9   4    6.63    6.29
   5   9  -4    3.44    7.67
  -5   9   4    0.77    6.45
   5  -9  -4    5.28    5.44
  -5  -9   4   -2.46    5.33
   5  -9  -4   -9.43    8.46
  -5  -9   4   -4.08    4.72
   4   9  -4  172.71   10.69
  -4   9   4  171.93    9.38
   4  -9  -4  126.56    9.30
  -4  -9   4  172.62    8.71
   4  -9  -4  171.92   11.45
  -4  -9   4  123.33    8.57
   3   9  -4   54.35    8.27
  -3   9   4   47.43    7.29
  -3  -9   4   54.04    6.27
   3  -9  -4   60.20    8.91
  -3  -9   4   48.87    6.80
   2   9  -4   -1.54    5.50
  -2   9   4   -2.21    4.19
  -2  -9   4   -0.13    5.32
   2  -9  -4   -2.46    7.72
  -2  -9   4    1.77    6.77
   1   9  -4  171.07   11.22
  -1   9   4  170.21   10.22
  -1  -9   4  185.82   10.14
  -1  -9   4  134.64   10.43
   1  -9  -4  178.70   10.53
   0   9  -4   13.32    6.74
   0   9   4   11.12    5.99
   0  -9   4   14.68    7.11
   0  -9   4    7.81    6.11
   0  -9  -4   24.44    8.23
  -1   9  -4  213.73   12.00
   1   9   4  206.40    9.84
   1  -9   4  214.00   10.40
  -1  -9  -4  218.74   11.92
  -2   9  -4   53.92    7.10
   2   9   4   56.31    8.18
   2  -9   4   43.12    5.89
   2  -9   4   25.79    8.05
  -2  -9  -4   43.23    8.44
  -3   9  -4  644.87   23.70
   3   9   4  594.87   20.89
   3  -9   4  613.20   21.79
  -3  -9  -4  682.71   23.93
  -4   9  -4   33.88    8.05
   4   9   4   32.88    7.56
   4  -9   4   25.23    7.32
  -4  -9  -4   25.56    6.69
  -4   9  -4   26.67    6.17
  -5   9  -4   11.51    9.14
   5   9   4   16.80    6.36
   5  -9   4   11.92    5.58
  -5  -9  -4   15.42    9.64
  -5   9  -4   12.38    5.12
  -6   9  -4   12.81    8.40
   6   9   4   12.05    7.58
   6  -9   4   20.35    8.43
  -6  -9  -4   14.03    6.80
  -6   9  -4   18.89    6.25
  -7   9  -4    4.54    6.39
   7   9   4    2.91    6.18
   7  -9   4    7.15    6.98
  -7  -9  -4    4.89    8.52
  -7   9  -4    3.77    6.44
  -8   9  -4  156.51   12.02
   8   9   4  154.02   11.65
   8  -9   4  146.32   10.23
  -8  -9  -4  142.53    9.23
  -8   9  -4  168.94   11.27
  -9   9  -4    2.43    9.20
   9   9   4    7.46    9.37
   9  -9   4   -3.52    8.60
  -9  -9  -4    4.82    7.28
  -9   9  -4   -1.45    6.78
 -10   9  -4   31.86    7.49
  10   9   4   48.60    8.61
  10  -9   4   43.15    8.55
 -10  -9  -4   41.30   10.18
 -10   9  -4   55.70    8.45
 -11   9  -4   26.78   11.09
  11   9   4   34.60    8.73
  11  -9   4   47.16    9.11
 -11  -9  -4   48.70   10.14
 -11   9  -4   34.66    8.63
  12   9   4   -4.79    8.43
  12  -9   4    3.89    8.99
 -12  -9  -4    0.68    7.74
 -12   9  -4    6.58    7.41
  13   9   4   28.94    8.84
  13  -9   4   25.87   10.30
 -13  -9  -4   39.45    9.74
 -13   9  -4   19.44   10.23
  14   9   4   -1.06    8.53
  14  -9   4   21.00    9.84
 -14  -9  -4    8.08   10.34
 -14   9  -4   -6.02    9.95
  15  -9   4   72.92   14.18
 -15  -9  -4   59.09    8.91
  18 -10  -4  170.93   15.32
 -18 -10   4  117.30   12.07
 -18  10   4  144.62   13.47
  17  10  -4    1.39   13.11
  17 -10  -4  -10.00   12.33
 -17 -10   4    1.52   11.25
 -17  10   4   -4.44   10.46
  16  10  -4   -1.25    9.92
  16 -10  -4    0.42   14.79
 -16 -10   4   12.01    8.71
 -16  10   4   -6.41   10.66
  15  10  -4   20.09   10.52
  15  10  -4   15.77   10.75
  15 -10  -4    9.09   12.24
 -15 -10   4   15.92    9.09
 -15  10   4   29.70   12.20
  14  10  -4   -8.10    8.08
  14  10  -4    2.46    8.93
  14 -10  -4    2.44   12.52
 -14 -10   4   -8.50    7.95
 -14  10   4    7.28   12.15
  13  10  -4   39.16    9.71
  13  10  -4   17.62    9.12
  13 -10  -4   41.22   11.74
 -13 -10   4   24.21    8.46
 -13  10   4   25.97    8.61
  12  10  -4   14.84    9.61
  12  10  -4    3.95    8.92
  12 -10  -4    4.19   10.89
 -12 -10   4    7.61    9.71
 -12  10   4   12.38    9.58
  11  10  -4   -4.27    6.16
 -11  10   4    4.01    7.07
  11 -10  -4   13.54   10.62
 -11 -10   4    2.84    6.63
  11 -10  -4    3.80   11.09
 -11 -10   4   -2.99    8.14
  10  10  -4    6.95   10.13
 -10  10   4    9.28    7.88
  10 -10  -4    7.45    9.33
 -10 -10   4    0.44    7.37
  10 -10  -4   10.66   12.07
 -10 -10   4   10.15    7.97
   9  10  -4  266.38   18.54
  -9  10   4  257.54   16.98
   9 -10  -4  271.32   18.81
  -9 -10   4  280.28   18.80
   9 -10  -4  266.82   20.00
  -9 -10   4  223.64   15.69
   8  10  -4    7.73    8.80
  -8  10   4   13.79    5.90
   8 -10  -4    1.20    7.43
  -8 -10   4   17.71    5.99
   8 -10  -4   13.04    8.47
  -8 -10   4   12.20    8.32
   7  10  -4   23.91    8.88
  -7  10   4   20.02    5.51
   7 -10  -4   19.17    6.59
  -7 -10   4   23.15    6.81
   7 -10  -4   22.09    7.18
  -7 -10   4   26.95    9.44
   6  10  -4   25.64    8.27
  -6  10   4   11.32    6.55
   6 -10  -4    8.81    5.53
  -6 -10   4   11.94    6.84
   6 -10  -4   16.50    9.45
  -6 -10   4   18.58    7.69
   5  10  -4   32.21    6.71
  -5  10   4   33.35    6.52
   5 -10  -4   27.63    6.26
  -5 -10   4   33.06    6.27
   5 -10  -4   29.65    8.87
  -5 -10   4   34.08    7.02
   4  10  -4  132.95    8.90
  -4  10   4  145.65    9.43
  -4 -10   4  123.39    8.05
   4 -10  -4  134.76   11.85
   3  10  -4   47.72    6.89
  -3  10   4   43.59    7.59
  -3 -10   4   41.64    5.36
   3 -10  -4   39.04    7.58
  -3 -10   4   35.19    6.75
   2  10  -4   -3.94    6.68
  -2  10   4   -0.75    7.08
  -2 -10   4   -0.21    5.69
   2 -10  -4   -1.59    7.87
  -2 -10   4    2.88    6.48
   1  10  -4   21.06    7.99
  -1  10   4   16.34    7.43
  -1 -10   4   24.52    6.67
  -1 -10   4   24.27    7.23
   1 -10  -4   20.79    6.91
   0  10  -4  336.57   15.55
   0  10   4  353.25   15.29
   0 -10   4  345.09   14.95
   0 -10   4  270.13   16.40
   0 -10  -4  351.43   16.55
  -1  10  -4   78.63    9.17
   1  10   4   78.95    7.31
   1 -10   4   75.54    8.08
   1 -10   4   54.29    8.87
  -1 -10  -4   56.31    9.54
  -2  10  -4   25.32    9.22
   2  10   4   34.87    8.96
   2 -10   4   30.53    8.06
   2 -10   4   16.48    7.81
  -2 -10  -4   31.97    9.72
  -3  10  -4   31.96    6.34
   3  10   4   18.07    7.84
   3 -10   4   23.61    6.98
   3 -10   4   18.60    7.99
  -3 -10  -4   24.81    7.17
  -4  10  -4   36.66    9.87
   4  10   4   41.61    7.61
   4 -10   4   28.17    8.52
   4 -10   4   17.11    8.74
  -4 -10  -4   40.92    8.49
  -5  10  -4  162.57   12.27
   5  10   4  159.71   10.45
   5 -10   4  170.18   11.19
  -5 -10  -4  174.20   11.90
  -6  10  -4   41.26    9.46
   6  10   4   37.12    7.97
   6 -10   4   55.20    9.58
  -6 -10  -4   43.03    8.34
  -6  10  -4   12.77    6.25
  -7  10  -4   17.65    9.77
   7  10   4   16.62    8.63
   7 -10   4   10.16    6.05
  -7 -10  -4   18.08   10.30
  -7  10  -4    5.88    7.68
  -8  10  -4   10.57    9.37
   8  10   4   15.95    6.12
   8 -10   4   11.27    7.15
  -8 -10  -4    2.62    9.95
  -8  10  -4    6.68    7.49
  -9  10  -4  143.94   12.11
   9  10   4  142.09   10.33
   9 -10   4  160.22   12.43
  -9 -10  -4  215.47   16.68
  -9  10  -4  160.43   11.94
 -10  10  -4   31.78    9.44
  10  10   4   35.83    7.49
  10 -10   4   27.34    9.18
 -10 -10  -4   11.28    8.74
 -10  10  -4   22.10    7.93
  11  10   4    1.79    7.78
  11 -10   4   -3.52    9.56
 -11 -10  -4   -8.68   11.31
 -11  10  -4   -2.73    8.55
  12  10   4   12.85    9.05
  12 -10   4    2.58   10.07
 -12 -10  -4   18.78   10.74
 -12  10  -4    5.38    9.29
  13  10   4    5.86    8.19
  13 -10   4   35.44   15.18
 -13 -10  -4   13.61   11.58
  14 -10   4   72.39   11.36
 -14 -10  -4   69.54   11.61
  17 -11  -4  105.91   16.08
 -17 -11   4   72.78   14.28
 -17  11   4   98.50   13.18
  16 -11  -4    4.93   14.80
 -16 -11   4    5.63   10.80
 -16  11   4    4.21   14.03
  15  11  -4  -10.60    9.49
  15 -11  -4    3.38   13.83
 -15 -11   4    4.94   10.33
 -15  11   4   -4.78   14.84
  14  11  -4   17.24    8.27
  14  11  -4    7.70    9.63
  14 -11  -4   -1.58   14.75
 -14 -11   4    1.19   10.15
 -14  11   4    6.49   12.98
  13  11  -4   25.88    7.80
  13 -11  -4   31.75   10.83
 -13 -11   4   28.08    9.37
 -13 -11   4   46.35   10.18
 -13  11   4   20.38   10.42
  12  11  -4   14.85   11.23
  12 -11  -4   22.99   11.40
 -12 -11   4   14.23    7.80
 -12 -11   4   20.32    9.11
 -12  11   4   33.43   11.92
  11  11  -4    0.11    8.65
 -11  11   4   -3.31    7.98
  11 -11  -4    3.15    7.92
 -11 -11   4   -1.95    5.64
  11 -11  -4   16.22   12.48
 -11 -11   4    1.09    8.38
  10  11  -4   -1.83   11.44
 -10  11   4    0.40    7.09
  10 -11  -4    6.44    9.95
 -10 -11   4    0.91    5.80
  10 -11  -4   11.62   12.24
 -10 -11   4   -0.29    7.53
   9  11  -4   -0.93    8.34
  -9  11   4    2.22    7.00
   9 -11  -4   18.04   10.14
  -9 -11   4    0.92    7.57
   9 -11  -4    5.45    9.06
  -9 -11   4    1.72    7.94
   8  11  -4  138.32   11.39
  -8  11   4  159.82   11.80
  -8 -11   4  140.48    9.03
   8 -11  -4  137.49   11.29
  -8 -11   4  142.84   11.33
   7  11  -4   55.39    7.43
  -7  11   4   93.38    9.67
   7 -11  -4   65.51    8.25
  -7 -11   4   79.51    8.06
   7 -11  -4   87.54    9.94
  -7 -11   4   75.34    9.70
   6  11  -4   -4.68    7.98
  -6  11   4    1.77    6.62
   6 -11  -4    6.79    6.40
  -6 -11   4    3.74    7.15
   6 -11  -4    6.75   10.22
  -6 -11   4    1.04    7.53
   5  11  -4   -1.97    5.73
  -5  11   4    9.35    6.14
  -5 -11   4   -3.78    7.91
   5 -11  -4   -0.69    8.63
  -5 -11   4    3.10    7.47
   4  11  -4   52.58    9.63
  -4  11   4   43.96    6.34
  -4 -11   4   47.47    7.55
   4 -11  -4   44.96    7.48
  -4 -11   4   45.96    8.87
   3  11  -4   10.50    8.66
  -3  11   4    1.23    7.44
  -3 -11   4    1.40    6.19
   3 -11  -4   -1.38    8.40
  -3 -11   4   -3.76    7.14
   2  11  -4   -6.13    6.23
  -2  11   4   -1.38    5.65
  -2 -11   4   -1.13    5.40
   2 -11  -4   -5.12    9.05
  -2 -11   4   -0.60    6.97
   1  11  -4   50.05    9.31
  -1  11   4   52.03    7.35
  -1 -11   4   61.03    7.52
  -1 -11   4   34.70    9.04
   1 -11  -4   50.72   10.29
   0  11  -4   10.07    7.18
   0  11   4   11.76    5.77
   0 -11   4    7.88    4.62
   0 -11   4    4.55    7.81
   0 -11  -4    6.46    9.23
  -1  11  -4    4.34    8.73
   1  11   4    3.25    7.70
   1 -11   4    4.20    4.72
   1 -11   4    2.69    8.21
  -1 -11  -4    4.59    9.37
  -2  11  -4    1.77    8.65
   2  11   4    0.50    5.76
   2 -11   4   -0.74    5.41
   2 -11   4    5.12    8.89
  -2 -11  -4    7.19    7.05
  -3  11  -4   31.58    7.55
   3  11   4   24.38    7.71
   3 -11   4   13.27    8.32
   3 -11   4   15.26    7.61
  -3 -11  -4   28.23   11.16
  -4  11  -4   43.81   10.95
   4  11   4   45.32    9.84
   4 -11   4   43.55    7.76
   4 -11   4   22.23   10.73
  -4 -11  -4   49.49   11.88
  -5  11  -4   -0.39   10.64
   5  11   4    2.84    9.00
   5 -11   4    1.05    8.71
  -5 -11  -4    3.91   11.24
  -5  11  -4    0.26    6.56
  -6  11  -4   -2.93    7.13
   6  11   4    0.45    6.82
   6 -11   4   -5.27   10.82
  -6 -11  -4   -3.81    6.91
  -6  11  -4    3.53    7.54
  -7  11  -4    4.01    8.76
   7  11   4   -2.07   10.29
   7 -11   4    3.32    6.40
  -7 -11  -4    7.91    9.36
  -7  11  -4   -1.08    6.93
  -8  11  -4   88.05   11.47
   8  11   4   80.69    8.66
   8 -11   4   84.29    9.72
  -8 -11  -4   87.98   11.61
  -8  11  -4   62.23    9.35
  -9  11  -4    4.55    8.27
   9  11   4    4.44    6.61
   9 -11   4   -0.61   10.48
  -9 -11  -4   -6.39    8.83
  -9  11  -4   -2.19    8.90
 -10  11  -4   21.06   11.61
  10  11   4   28.68    8.91
  10 -11   4   18.17    9.75
 -10 -11  -4   29.56    7.13
 -10  11  -4   23.12    9.44
  11  11   4   -1.28    8.28
  11 -11   4    2.11    7.74
 -11 -11  -4    4.91    7.11
  12  11   4   -6.55    7.85
  12 -11   4   -1.65   10.48
 -12 -11  -4    6.10   11.55
  13  11   4    9.63   10.90
  13 -11   4    7.17   10.53
 -13 -11  -4   19.46   10.67
  16 -12  -4   10.72   18.11
 -16 -12   4   -0.26   13.27
 -16  12   4   -2.51   12.06
  15 -12  -4    2.89   15.94
 -15 -12   4   17.16   11.97
 -15  12   4    8.08   15.00
  14  12  -4    1.64    8.88
  14 -12  -4   -1.83   10.88
 -14 -12   4   -9.69   11.22
 -14  12   4   -0.55   14.31
  13  12  -4   34.64   10.40
  13 -12  -4   24.24   11.12
 -13 -12   4   26.81   10.24
 -13  12   4   42.53   10.43
  12  12  -4   -0.93   12.56
  12 -12  -4    1.68   11.42
 -12 -12   4   -0.57    7.68
  11  12  -4   37.10    9.61
 -11  12   4   16.70   10.42
  11 -12  -4   20.79   12.80
 -11 -12   4   14.81    7.89
  11 -12  -4   18.01   10.52
 -11 -12   4   30.48    8.87
  10  12  -4    6.39    7.27
 -10  12   4    7.86    7.91
  10 -12  -4   -1.03    9.70
 -10 -12   4    8.76    8.27
  10 -12  -4    5.13    9.87
 -10 -12   4   -0.56    9.70
   9  12  -4   71.85    8.60
  -9  12   4   70.98    8.12
   9 -12  -4   94.83   10.41
  -9 -12   4  123.80   11.62
   9 -12  -4  105.55   13.67
  -9 -12   4   64.00   12.09
   8  12  -4   13.40    9.38
  -8  12   4   10.43    7.33
  -8 -12   4   13.53    7.19
   8 -12  -4   14.26   11.52
  -8 -12   4    3.39    6.97
   7  12  -4   46.84    8.30
  -7  12   4   40.50    8.85
  -7 -12   4   32.54    6.66
   7 -12  -4   42.13    9.55
  -7 -12   4   39.70    8.41
   6  12  -4  211.48   14.10
  -6  12   4  208.74   10.61
  -6 -12   4  170.89    9.67
   6 -12  -4  222.87   12.88
  -6 -12   4  172.53   11.47
   5  12  -4   -0.82    7.67
  -5  12   4   11.87    7.73
  -5 -12   4    0.39    5.70
   5 -12  -4   -2.92    8.38
  -5 -12   4    0.88    7.80
   4  12  -4  115.35    9.41
  -4  12   4  116.80    8.30
  -4 -12   4  111.71    8.34
   4 -12  -4  117.38   10.74
  -4 -12   4  100.32    9.23
   3  12  -4   20.15    8.12
  -3  12   4   24.35    9.42
  -3 -12   4   22.78    7.04
   3 -12  -4   21.31    8.86
  -3 -12   4   20.51    8.45
   2  12  -4   -1.16    7.19
  -2  12   4    7.21    7.30
  -2 -12   4   -9.10    7.71
   2 -12  -4   -5.46    7.54
  -2 -12   4    4.40    7.70
   1  12  -4   40.41    9.46
  -1  12   4   49.67    8.89
  -1 -12   4   56.97    8.59
  -1 -12   4   41.53    8.84
   1 -12  -4   50.75    9.16
   0  12  -4  470.11   28.33
   0  12   4  441.83   25.84
   0 -12   4  436.06   25.03
   0 -12   4  395.06   27.75
   0 -12  -4  451.33   27.31
  -1  12  -4    1.94    9.91
   1  12   4    1.12    9.95
   1 -12   4   -8.18    7.31
   1 -12   4   -1.06    8.32
  -1 -12  -4   12.00   10.03
  -2  12  -4  115.34   11.77
   2  12   4  119.55    8.20
   2 -12   4  127.33    8.43
   2 -12   4   81.76   11.19
  -2 -12  -4  118.04   12.36
  -3  12  -4  165.82   12.13
   3  12   4  161.51    9.35
   3 -12   4  165.18   10.72
   3 -12   4  122.98   11.87
  -3 -12  -4  180.45   11.13
  -4  12  -4   94.73   10.95
   4  12   4   91.56    8.66
   4 -12   4   92.04    7.83
   4 -12   4   59.42   11.32
  -4 -12  -4  106.32    9.27
  -5  12  -4   -5.33   10.02
   5  12   4    8.79    6.40
   5 -12   4    1.75    7.44
  -5 -12  -4    1.09   11.38
  -5  12  -4    3.03    8.04
  -6  12  -4    4.60    9.66
   6  12   4   -2.37    7.08
   6 -12   4    6.27    7.75
  -6 -12  -4   11.86    9.57
  -6  12  -4    6.34    8.64
  -7  12  -4    1.47    7.71
   7  12   4    5.43    8.58
   7 -12   4    4.07    7.50
  -7 -12  -4   -7.98   11.59
  -7  12  -4    7.10    9.56
  -8  12  -4   -1.18    8.77
   8  12   4   -0.56    7.02
   8 -12   4    2.62    6.79
  -8 -12  -4    7.54    9.94
  -9  12  -4  170.55   14.68
   9  12   4  158.28   13.62
   9 -12   4  184.19   14.58
  -9 -12  -4  167.78   11.37
 -10  12  -4    2.41    9.88
  10  12   4  -10.53   11.42
  10 -12   4   -6.06   11.03
 -10 -12  -4   -0.81    9.83
  11  12   4    4.21   12.86
  11 -12   4    6.65   14.00
 -11 -12  -4    0.45    7.78
  12  12   4   46.47   13.08
  12 -12   4   45.45   10.07
 -12 -12  -4   51.07   10.34
  14  13  -4   24.90   12.98
 -14 -13   4   19.86   10.35
 -14  13   4   33.00   13.06
  13  13  -4   23.98   12.29
 -13 -13   4   23.35   12.84
 -13  13   4   13.68   11.91
  12  13  -4    1.19   10.94
  12 -13  -4    2.62    9.63
 -12 -13   4    1.92   10.81
  11  13  -4   10.21   10.88
  11 -13  -4    8.65   13.37
 -11 -13   4    0.78   11.65
  10  13  -4   53.99   11.33
 -10  13   4   59.96   10.87
  10 -13  -4   51.29   11.64
 -10 -13   4   43.12    9.69
   9  13  -4   25.31   11.08
  -9  13   4   24.86    8.79
   9 -13  -4   37.28   12.78
  -9 -13   4   44.97    9.65
   8  13  -4  212.02   14.39
  -8  13   4  137.50   11.29
  -8 -13   4  187.78   12.09
   8 -13  -4  197.65   16.09
  -8 -13   4  148.95   15.28
   7  13  -4  183.40   14.37
  -7  13   4  179.34   13.85
  -7 -13   4  193.69   12.51
   7 -13  -4  193.55   13.79
  -7 -13   4  166.69   13.93
   6  13  -4    3.50    7.62
  -6  13   4    2.60   10.39
  -6 -13   4    3.64    8.05
   6 -13  -4   -1.86    9.85
  -6 -13   4    2.62    8.47
   5  13  -4   28.75   11.03
  -5  13   4    9.70    9.40
  -5 -13   4    8.68    7.60
   5 -13  -4   19.65   11.71
  -5 -13   4    4.79    7.65
   4  13  -4  107.67   10.64
  -4  13   4   97.28    8.18
  -4 -13   4  100.93    9.24
   4 -13  -4  120.98   12.83
  -4 -13   4   59.19    8.41
   3  13  -4   -0.73    8.18
  -3  13   4   -0.48    9.16
  -3 -13   4    3.21    6.64
   3 -13  -4    5.83    7.93
  -3 -13   4    0.27    7.26
   2  13  -4    5.64    7.23
  -2  13   4    1.30    9.13
  -2 -13   4    0.89    5.79
  -2 -13   4   -2.64    7.84
   2 -13  -4    6.83   10.52
   1  13  -4   77.97   10.13
  -1  13   4   86.18    7.82
  -1 -13   4   66.40    7.78
  -1 -13   4   48.81    8.83
   1 -13  -4   90.36   13.63
   0  13  -4   -0.82    7.82
   0  13   4   -0.65    8.11
   0 -13   4   -0.66    6.48
   0 -13   4   -0.40    8.36
   0 -13  -4   -1.60    8.26
  -1  13  -4   12.70   10.00
   1  13   4   21.42    9.62
   1 -13   4   21.71    6.92
   1 -13   4   24.17    8.83
  -1 -13  -4   32.71    9.17
  -2  13  -4   71.84   11.32
   2  13   4   79.29    8.54
   2 -13   4   50.24    9.68
   2 -13   4   41.46   11.11
  -2 -13  -4   77.99   13.15
  -3  13  -4    0.14    9.93
   3  13   4   -6.24    8.30
   3 -13   4    7.69   10.15
   3 -13   4   -7.41    9.40
  -3 -13  -4    7.36   13.49
  -4  13  -4   11.20   11.64
   4  13   4   17.75   10.18
   4 -13   4   25.22    8.91
   4 -13   4    5.97   10.76
  -4 -13  -4    2.80   12.37
  -5  13  -4   13.57   10.42
   5  13   4   24.84   11.62
   5 -13   4    6.76    9.94
  -5 -13  -4   18.31    8.33
  -6  13  -4   11.00    9.45
   6  13   4   11.46    9.14
   6 -13   4   11.33   12.37
  -6 -13  -4    9.27    8.41
  -7  13  -4    2.50    9.35
   7  13   4   -0.18    9.85
   7 -13   4    5.64    9.85
  -7 -13  -4   -9.68   12.06
  -8  13  -4    7.13   11.26
   8  13   4   -9.11    8.93
   8 -13   4    5.18    8.04
  -8 -13  -4    2.86   11.76
  -9  13  -4   14.81   12.01
   9  13   4    6.30   11.10
   9 -13   4   -6.03   11.15
  -9 -13  -4    5.84    8.60
  10  13   4   -1.65    7.75
  10 -13   4    3.41    9.05
 -10 -13  -4   -3.52    9.84
  11  13   4   -4.75    9.42
  11 -13   4   -5.39   14.73
 -11 -13  -4    1.18    9.69
  13  14  -4   81.33   13.24
 -13 -14   4   43.05   15.03
 -13  14   4  119.25   14.19
  12  14  -4   10.01   12.83
  12 -14  -4   -0.63   16.89
 -12 -14   4  -11.60   13.45
  11  14  -4   23.93   12.15
  11 -14  -4   25.86   13.32
 -11 -14   4   20.72   11.67
  10  14  -4   15.33   10.31
 -10  14   4   -5.52    9.36
  10 -14  -4    9.13   10.53
 -10 -14   4    6.68   10.33
   9  14  -4  346.20   18.67
   9 -14  -4  364.62   21.42
  -9 -14   4  310.88   17.69
   8  14  -4    6.56    8.43
  -8  14   4    7.60   10.31
   8 -14  -4   13.92   10.86
  -8 -14   4   -3.12    9.09
   7  14  -4  155.86   14.15
  -7  14   4  122.75   11.53
   7 -14  -4  170.48   16.51
  -7 -14   4  154.07   14.94
   6  14  -4  183.69   15.39
  -6  14   4  156.73   10.05
   6 -14  -4  234.08   14.18
  -6 -14   4  163.08   16.37
   5  14  -4   33.04    9.69
  -5  14   4   24.01    9.23
   5 -14  -4    9.71   11.10
  -5 -14   4   12.80   10.09
   4  14  -4  146.90   11.81
  -4  14   4  142.31   11.29
  -4 -14   4  118.28   10.15
   4 -14  -4  153.37   13.73
  -4 -14   4   96.11   11.54
   3  14  -4    8.23   10.71
  -3  14   4   -5.45    8.49
  -3 -14   4    2.71    6.67
   3 -14  -4    0.40   11.12
  -3 -14   4    0.87    8.92
   2  14  -4   74.77   14.59
  -2  14   4  102.66    9.20
  -2 -14   4   70.02   10.30
   2 -14  -4   94.19   12.84
  -2 -14   4   71.81   10.83
   1  14  -4    5.92    8.24
  -1  14   4   -2.21    8.04
  -1 -14   4   -1.36    6.46
  -1 -14   4    2.63    9.88
   1 -14  -4  -15.52   11.84
   0  14  -4  853.73   20.56
   0  14   4  795.85   32.63
   0 -14   4  825.92   34.79
   0 -14  -4  910.58   22.91
  -1  14  -4   11.98   11.46
   1  14   4   25.16   10.92
   1 -14   4   17.67    8.90
   1 -14   4    6.95    8.58
  -1 -14  -4   19.02   10.53
  -2  14  -4   77.41   12.32
   2  14   4   81.34    8.83
   2 -14   4   80.35    9.72
  -2 -14  -4   87.75   12.46
  -3  14  -4  379.13   17.75
   3  14   4  317.97   16.41
   3 -14   4  336.71   17.06
  -3 -14  -4  376.43   18.82
  -4  14  -4  109.60   11.67
   4  14   4  110.10   10.90
   4 -14   4  105.32   12.54
  -4 -14  -4  107.61   13.20
  -5  14  -4   15.67   11.32
   5  14   4   32.75   11.05
   5 -14   4   12.68   11.24
  -5 -14  -4   27.50    9.69
  -6  14  -4   -4.75   11.01
   6  14   4   -2.31   10.24
   6 -14   4   -2.89    9.13
  -6 -14  -4   10.95   11.65
  -7  14  -4   49.85   13.07
   7  14   4   39.58   11.22
   7 -14   4   49.97    8.89
  -7 -14  -4   36.69   10.74
  -8  14  -4   28.73   14.64
   8  14   4   10.47   10.50
   8 -14   4   40.22   11.96
  -8 -14  -4   15.18   11.00
   9  14   4  298.37   14.16
   9 -14   4  335.49   15.77
  -9 -14  -4  367.24   17.36
  10  14   4   19.69   13.32
  10 -14   4   12.74   11.78
 -10 -14  -4   13.08   13.67
  11  15  -4   27.72   11.29
  11 -15  -4   23.77   13.84
  10  15  -4   67.63   13.33
  10 -15  -4   53.29   12.62
   9  15  -4    0.17   10.76
  -9  15   4    1.22   10.13
   9 -15  -4    7.65   14.46
  -9 -15   4    4.76   10.26
   8  15  -4   88.18   15.01
  -8  15   4   81.42   12.56
   8 -15  -4  103.50   14.94
  -8 -15   4   82.96   11.26
   7  15  -4   31.05    9.40
  -7  15   4   27.27   10.90
   7 -15  -4   45.58   11.48
  -7 -15   4   16.05   11.42
   6  15  -4    3.18   10.27
  -6  15   4   -9.74   11.27
   6 -15  -4    8.58   13.46
  -6 -15   4   11.57    9.32
   5  15  -4    0.90    7.93
  -5  15   4    3.52   10.30
   5 -15  -4   -8.47   10.70
  -5 -15   4  -10.05   10.68
   4  15  -4  166.39   15.00
  -4  15   4  166.44   11.90
   4 -15  -4  162.52   13.62
  -4 -15   4   91.53   11.29
   3  15  -4    1.26    8.73
  -3  15   4    4.86    8.65
   3 -15  -4    3.22   13.76
   2  15  -4   13.64    8.75
  -2  15   4    3.35   11.54
   2 -15  -4  -11.99   11.23
   1  15  -4   27.09    9.84
  -1  15   4   45.50   11.32
   1 -15  -4   38.87   10.87
   0  15  -4   -4.83   13.21
   0  15   4    5.02    7.60
   0 -15  -4    3.65   10.73
  -1  15  -4   24.00    9.17
   1  15   4   12.61    7.47
   1 -15   4   25.37   10.83
  -1 -15  -4   18.20   10.62
  -2  15  -4   14.23   14.41
   2  15   4    2.00   10.46
   2 -15   4   -0.27   10.13
  -2 -15  -4   -3.29   10.00
  -3  15  -4   22.80   12.46
   3  15   4   21.67   10.84
   3 -15   4   26.31    9.79
  -3 -15  -4   10.45   11.93
  -4  15  -4  -11.15   13.68
   4  15   4   10.93    8.30
   4 -15   4   -1.71    7.99
  -4 -15  -4    2.54   14.01
  -5  15  -4   35.81   12.97
   5  15   4   22.29    8.48
   5 -15   4   20.16   11.47
  -5 -15  -4   38.64   12.59
  -6  15  -4    9.06   13.23
   6  15   4   18.03   11.25
   6 -15   4   12.72    9.15
  -6 -15  -4   11.73    9.27
  -7  15  -4    6.36   13.48
   7  15   4    8.73   12.05
   7 -15   4   -8.88   13.70
  -7 -15  -4   -6.09    9.15
  -8  15  -4    6.36   12.90
   8  15   4    4.65    9.30
   8 -15   4    6.56   10.50
  -8 -15  -4    6.04   12.10
   8  16  -4   13.70   11.62
  -8  16   4   -0.39    9.12
   8 -16  -4    5.07   11.73
   7  16  -4  104.48   11.68
  -7  16   4  101.28   12.75
   7 -16  -4  157.46   15.62
   6  16  -4  226.65   12.71
  -6  16   4  195.69   12.43
   6 -16  -4  187.34   17.02
   5  16  -4   16.74   10.47
  -5  16   4    7.48    8.91
   5 -16  -4    1.26   12.82
   4  16  -4  109.75   11.90
  -4  16   4   92.01   16.20
   4 -16  -4  122.42   13.95
   3  16  -4    9.52    9.69
  -3  16   4   24.56    9.37
   3 -16  -4   30.03   11.87
   2  16  -4   42.11   10.23
  -2  16   4   42.16   11.35
   2 -16  -4   47.81   11.47
   1  16  -4   -5.28    8.70
  -1  16   4    4.73   10.98
   1 -16  -4   20.06   14.50
   0  16  -4  397.38   22.96
   0  16   4  369.45   21.43
   0 -16  -4  457.45   26.80
  -1  16  -4   18.99   15.78
   1  16   4   15.53    8.14
  -1 -16  -4   -9.68   12.82
  -2  16  -4  131.95   12.86
   2  16   4  114.63   11.42
  -2 -16  -4  156.43   17.58
  -3  16  -4  230.43   13.40
   3  16   4  241.47   12.12
  -3 -16  -4  249.10   20.99
  -4  16  -4  197.19   15.81
   4  16   4  164.41   11.60
  -4 -16  -4  219.40   18.23
  -5  16  -4   19.45   16.72
   5  16   4    0.80   12.31
  -5 -16  -4   -4.30   12.63
   4  17  -4    2.33   10.73
  -4  17   4    8.22   10.32
   4 -17  -4   -5.05   16.68
   3  17  -4   10.92    9.70
  -3  17   4   -5.26   14.67
   3 -17  -4   31.14   15.60
   2  17  -4  -17.87   10.82
  -2  17   4    0.38   12.91
   2 -17  -4   13.38   15.02
   1  17  -4   58.26   10.68
  -1  17   4   60.61   14.55
   1 -17  -4   57.21   17.15
   0  17  -4   11.08   11.26
   0  17   4    1.25    9.82
   0 -17  -4   -2.91   16.31
  -1 -17  -4   -6.06   11.91
  21   0  -5  -15.95   12.53
 -21   0   5   -7.91    7.46
  20   0  -5   -6.82   10.24
 -20   0   5    1.97    7.81
  19   0  -5   11.16   11.27
 -19   0   5    5.19   10.48
  18   0  -5   -2.84    9.69
 -18   0   5    4.97   11.62
  17   0  -5    2.76    7.95
 -17   0   5   20.78    9.28
  16   0  -5    3.94    8.35
 -16   0   5    1.57    8.97
  15   0  -5    4.41    6.30
 -15   0   5   -5.31    7.89
  14   0  -5   -0.19    8.99
 -14   0   5   -5.66    7.63
  13   0  -5    4.49    6.54
 -13   0   5   10.19    7.47
  12   0  -5    1.98    7.02
 -12   0   5    3.34    6.13
  11   0  -5    0.06    4.29
  11   0  -5    0.18    7.22
 -11   0   5    2.50    6.95
 -10   0   5    4.54    7.58
   9   0  -5   -0.16    5.06
   9   0  -5   -6.90    7.71
   8   0  -5   -1.49    4.79
   8   0  -5   -0.12    6.74
  -8   0   5   -3.22    4.45
   7   0  -5    1.58    5.26
   7   0  -5   -6.16    7.84
   6   0  -5   -5.21    5.63
   6   0  -5    5.80    7.84
  -6   0   5    1.84    4.19
   5   0  -5   -1.94    4.26
   5   0  -5   -2.31    5.88
  -5   0   5    3.16    3.31
   4   0  -5    4.88    6.69
   4   0  -5    1.32    5.79
   4   0  -5    2.80    4.85
   3   0  -5    3.32    6.41
   3   0  -5    2.26    4.46
   3   0  -5   -0.24    4.36
   2   0  -5   -0.95    5.83
  -2   0   5    3.66    4.42
   2   0  -5   -1.22    4.39
   1   0  -5    0.62    5.22
  -1   0   5    1.08    4.14
   1   0  -5   -1.79    4.16
   0   0  -5    0.00    5.44
   0   0   5    3.11    4.70
   0   0  -5   -1.65    3.70
  -1   0  -5    8.33    5.86
   1   0   5   12.27    4.84
  -1   0  -5   10.37    4.17
  -2   0  -5    1.59    6.45
   2   0   5   -3.75    4.59
  -2   0  -5   -0.69    3.18
  -3   0  -5   -6.21    7.92
   3   0   5    0.82    5.10
  -3   0  -5   -5.21    5.25
  -4   0  -5    7.74    6.49
   4   0   5    7.23    5.01
  -4   0  -5    7.00    5.49
  -5   0  -5   -2.66    5.64
   5   0   5    2.40    5.27
  -5   0  -5    1.30    4.01
  -6   0  -5    1.16    5.95
   6   0   5   -1.45    6.52
  -6   0  -5    3.97    5.45
  -7   0  -5   -1.00    6.90
   7   0   5    1.22    5.64
  -7   0  -5    6.14    6.02
  -8   0  -5    5.28    7.73
   8   0   5   -1.90    6.43
  -8   0  -5    3.04    4.85
  -9   0  -5    8.00    7.99
   9   0   5   -4.48    6.19
  -9   0  -5   -0.24    6.58
 -10   0  -5    1.46    7.19
  10   0   5    4.59    8.77
 -10   0  -5   -0.78    5.09
 -11   0  -5   -2.06    8.86
  11   0   5    1.34    6.49
 -11   0  -5   -4.69    7.88
  12   0   5   -5.40    7.92
 -12   0  -5   -0.94    5.87
  13   0   5    2.99   11.45
 -13   0  -5    2.14    9.01
  14   0   5  -13.40   10.48
 -14   0  -5    2.66    9.62
  15   0   5   -9.15   11.26
 -15   0  -5    1.23    7.41
  16   0   5    6.77   13.10
 -16   0  -5    2.83    7.74
  17   0   5    4.02   15.01
 -17   0  -5   -6.61   12.68
  21   1  -5   38.66   14.14
  21  -1  -5    6.79   14.33
 -21  -1   5   57.10    9.17
 -21   1   5   51.68   11.05
  20   1  -5    6.04    9.70
  20  -1  -5   10.95   10.26
 -20  -1   5    1.02   10.49
 -20   1   5   -0.79    7.70
  19   1  -5  617.72   32.88
  19  -1  -5  670.86   34.99
 -19  -1   5  654.49   30.35
 -19   1   5  656.11   30.17
  18   1  -5  273.11   18.96
  18  -1  -5  280.03   16.45
 -18  -1   5  268.93   14.49
 -18   1   5  295.04   16.63
  17   1  -5   -4.42    9.41
  17  -1  -5  -12.51   12.27
 -17  -1   5    4.57    8.01
 -17   1   5    8.49    7.78
  16   1  -5   95.01   12.66
  16  -1  -5   92.83   13.20
 -16  -1   5   78.27    8.45
 -16   1   5   87.80   11.37
  15   1  -5   75.01   10.66
  15  -1  -5   69.47   11.29
 -15  -1   5   67.39    9.37
 -15   1   5   83.18    9.65
  14   1  -5    7.97    8.31
  14  -1  -5    1.95    8.97
 -14  -1   5   -9.28    7.56
 -14   1   5    2.47    6.50
  13   1  -5 1018.40   32.80
  13  -1  -5 1065.12   35.34
 -13  -1   5 1071.13   33.47
 -13   1   5 1070.74   32.87
  12   1  -5   64.76    8.07
  12  -1  -5   64.54    7.85
 -12  -1   5   54.04    6.48
 -12   1   5   72.97    7.62
  11   1  -5   18.96    5.26
  11   1  -5   37.90    9.19
  11  -1  -5   20.80    6.64
 -11  -1   5   22.55    5.43
 -11   1   5   21.12    6.43
  10   1  -5 1793.18   39.42
  10  -1  -5 1745.28   37.10
 -10   1   5 1612.72   30.93
   9  -1  -5 1603.85   32.29
   9   1  -5 1608.59   34.03
   9   1  -5 1754.39   32.90
   9  -1  -5 1703.00   40.24
  -9  -1   5 1736.20   31.37
  -9   1   5 1747.27   30.70
   8  -1  -5  112.56    7.79
   8   1  -5  123.41    8.41
   8   1  -5  137.25   10.03
   8  -1  -5  128.15    9.49
  -8  -1   5  135.08    8.96
  -8   1   5  126.19    7.81
   7  -1  -5 1130.73   30.45
   7   1  -5 1184.45   30.34
   7   1  -5 1260.21   34.04
   7  -1  -5 1280.52   33.70
  -7  -1   5 1270.95   30.17
  -7   1   5 1296.66   31.01
   6  -1  -5    1.74    5.36
   6   1  -5    2.13    5.23
   6   1  -5   -1.58    5.76
   6  -1  -5    7.97    7.33
  -6  -1   5   -1.68    3.57
  -6   1   5    0.08    3.84
   5  -1  -5   10.41    5.40
   5   1  -5   13.10    4.78
   5   1  -5   13.89    7.40
   5  -1  -5    7.94    5.75
   5  -1  -5   10.93    5.63
  -5  -1   5    9.83    4.01
   4  -1  -5 1008.47   27.30
   4   1  -5 1004.74   26.36
   4   1  -5 1018.89   27.86
   4  -1  -5 1038.07   28.72
   4  -1  -5 1001.92   27.20
   3  -1  -5  709.81   21.50
   3   1  -5  719.34   21.50
   3  -1  -5  722.05   21.83
  -3  -1   5  731.65   18.84
   3  -1  -5  740.34   21.55
   2  -1  -5  188.34   10.37
   2   1  -5  184.44   10.24
  -2  -1   5  193.36    8.67
  -2   1   5  190.82    8.18
   2   1  -5  181.58    9.06
   2  -1  -5  183.26    9.26
   1  -1  -5 1755.20   40.14
   1   1  -5 1712.77   38.74
  -1  -1   5 1619.81   35.64
  -1   1   5 1676.86   35.71
   1   1  -5 1824.21   41.52
   1  -1  -5 1801.64   41.90
   0  -1  -5  558.42   17.67
   0   1  -5  540.86   17.51
   0  -1   5  520.80   15.11
   0   1   5  528.64   15.17
   0   1  -5  527.15   15.63
   0  -1  -5  522.16   16.27
  -1  -1  -5  154.39    9.75
  -1   1  -5  145.74    9.97
   1   1   5  142.69    7.26
   1  -1   5  142.87    7.74
  -1  -1  -5  132.14    7.84
  -1   1  -5  140.43    7.33
  -2  -1  -5 1645.33   38.82
  -2   1  -5 1536.43   37.31
   2   1   5 1433.83   40.21
   2  -1   5 1654.43   37.27
  -2  -1  -5 1582.52   36.20
  -2   1  -5 1638.66   37.70
  -3  -1  -5    3.06    7.15
  -3   1  -5    1.30    6.53
   3   1   5    1.55    5.93
   3  -1   5    1.75    6.23
  -3  -1  -5   -1.15    4.57
  -3   1  -5    2.20    5.69
  -4  -1  -5 1411.24   34.04
  -4   1  -5 1440.38   34.74
   4   1   5 1479.70   34.21
   4  -1   5 1473.79   34.23
  -4  -1  -5 1418.94   33.72
  -4   1  -5 1587.95   36.95
  -5  -1  -5 1331.60   27.91
  -5   1  -5 1257.21   26.66
   5   1   5 1140.87   27.19
   5  -1   5 1313.73   24.71
  -5  -1  -5 1206.87   23.93
  -6  -1  -5  250.80   11.59
  -6   1  -5  264.72   12.14
   6   1   5  250.93   10.90
   6  -1   5  250.54   10.55
  -6  -1  -5  255.47   10.66
  -6   1  -5  235.72   10.02
  -7  -1  -5  188.52   10.97
  -7   1  -5  185.34   10.55
   7   1   5  173.16    9.41
   7  -1   5  175.02    8.99
  -7  -1  -5  162.37    8.87
  -7   1  -5  187.19   10.18
  -8  -1  -5  610.53   20.64
  -8   1  -5  600.53   21.13
   8   1   5  556.39   19.95
   8  -1   5  591.27   19.19
  -8  -1  -5  595.83   20.53
  -8   1  -5  532.14   18.39
  -9  -1  -5   90.44    8.73
  -9   1  -5   74.34    8.53
   9   1   5   65.66    8.71
   9  -1   5   79.60    7.49
  -9  -1  -5   82.36    9.16
  -9   1  -5   73.29    7.50
 -10  -1  -5  510.74   17.68
 -10   1  -5  511.48   17.35
  10   1   5  525.61   18.30
  10  -1   5  503.47   16.77
 -10  -1  -5  437.80   15.03
 -10   1  -5  488.06   15.45
 -11   1  -5   53.63   10.15
  11   1   5   54.97    7.03
  11   1   5   44.56   10.50
  11  -1   5   54.54   10.06
 -11  -1  -5   56.76    9.55
 -11   1  -5   45.68    6.87
 -12   1  -5   12.65    9.01
  12   1   5    6.08    5.82
  12   1   5   16.76    9.92
  12  -1   5    6.80    9.11
 -12  -1  -5   12.89   10.01
 -12   1  -5    1.83    6.40
 -13   1  -5  429.87   20.63
  13   1   5  492.20   21.55
  13   1   5  497.52   23.64
  13  -1   5  477.64   22.52
 -13  -1  -5  534.94   22.52
  14   1   5   -1.75   11.29
  14  -1   5    1.59    7.75
 -14  -1  -5   -1.41    6.56
 -14   1  -5    2.73   10.64
  15   1   5   36.45    9.70
  15  -1   5   24.74   10.33
 -15  -1  -5   22.95    8.46
 -15   1  -5   21.70    8.54
  16   1   5   55.74   16.05
  16  -1   5   89.57   12.78
 -16  -1  -5   68.36   12.30
 -16   1  -5   69.25   10.59
  17   1   5   11.40   11.66
  17  -1   5    8.14   15.85
 -17  -1  -5   12.38    9.29
 -17   1  -5    8.92    8.20
  21   2  -5   30.08   18.24
  21  -2  -5    4.17   10.55
 -21  -2   5   -0.38   12.55
 -21   2   5   -0.23    9.91
  20   2  -5    2.92   11.07
  20  -2  -5   21.81    9.81
 -20  -2   5    6.80    8.19
 -20   2   5   15.65    8.59
  19   2  -5    7.94    9.84
  19  -2  -5   -1.88   12.12
 -19  -2   5    7.03   11.09
 -19   2   5   -1.83    9.68
  18   2  -5   -3.66   10.50
  18  -2  -5   13.40   10.32
 -18  -2   5    8.19    7.28
 -18   2   5  -15.06   10.76
  17   2  -5    5.10    8.57
  17  -2  -5    1.14   10.46
 -17  -2   5   10.00    9.84
 -17   2   5   18.26    8.15
  16   2  -5   21.34    9.31
  16  -2  -5    9.20   10.14
 -16  -2   5   16.87    9.17
 -16   2   5   15.91    6.90
  15   2  -5   -2.82   10.48
  15  -2  -5    0.25   10.15
 -15  -2   5    3.32    7.39
 -15   2   5    2.24    7.53
  14   2  -5    9.00    8.72
  14  -2  -5    0.12    9.82
 -14  -2   5   -3.71    7.28
 -14   2   5   -3.62    8.51
  13   2  -5    1.27    7.56
  13  -2  -5   -0.13    8.89
 -13  -2   5   -3.28    6.18
 -13   2   5   -0.58    5.74
  12   2  -5    0.65    4.67
  12   2  -5    3.71    8.06
  12  -2  -5   -5.25    6.97
 -12  -2   5   -3.50    4.52
 -12   2   5    2.93    5.35
  11   2  -5   -4.39    4.88
  11   2  -5   10.87    7.83
  11  -2  -5   -5.20    7.44
 -11  -2   5    1.32    5.85
 -11   2   5    3.60    6.83
  10   2  -5   25.10    6.52
  10   2  -5   26.75    8.40
  10  -2  -5   20.13    9.46
 -10  -2   5   16.10    5.44
 -10   2   5   15.75    7.86
   9  -2  -5   13.23    5.10
   9   2  -5   14.79    4.62
   9   2  -5   10.16    5.64
   9  -2  -5    9.88    8.73
  -9  -2   5   13.32    5.56
  -9   2   5   16.49    8.55
   8  -2  -5    3.48    4.42
   8   2  -5   -4.01    5.27
   8   2  -5   -0.93    6.80
   8  -2  -5   -0.63    7.47
  -8  -2   5   -2.87    5.09
  -8   2   5    3.51    4.79
   7  -2  -5  132.49    8.90
   7   2  -5  125.63    8.35
   7   2  -5  130.26    9.50
   7  -2  -5  138.05    9.83
  -7  -2   5  135.39    7.81
   6  -2  -5    8.58    5.98
   6   2  -5    8.90    6.58
   6   2  -5    8.84    6.68
   6  -2  -5    7.17    7.62
   6  -2  -5    3.25    6.21
  -6  -2   5    6.55    4.03
   5  -2  -5  238.98   10.57
   5   2  -5  254.79   11.18
   5   2  -5  270.95   11.99
   5  -2  -5  244.69   11.12
   5  -2  -5  223.71   10.11
  -5  -2   5  230.15    9.05
   4  -2  -5    2.14    5.51
   4   2  -5   -0.74    5.82
   4   2  -5   -4.97    5.58
   4  -2  -5   -0.83    5.11
   4  -2  -5   -0.29    5.48
  -4  -2   5   -1.06    3.28
   3  -2  -5   86.97    7.85
   3   2  -5   94.21    7.31
   3  -2  -5   93.54    8.13
  -3  -2   5   98.36    7.16
   3  -2  -5   95.30    7.11
  -3  -2   5   91.66    7.69
   2  -2  -5  554.10   17.77
   2   2  -5  576.13   18.13
  -2  -2   5  537.53   15.19
  -2   2   5  530.97   17.81
   2  -2  -5  572.58   18.37
   1  -2  -5  336.84   11.79
   1   2  -5  347.91   12.98
  -1  -2   5  356.04   11.07
  -1   2   5  284.96   11.54
   1  -2  -5  309.17   11.42
   0  -2  -5    1.40    7.29
   0   2  -5    3.48    5.31
   0  -2   5    5.33    5.25
   0   2   5    2.79    3.35
   0  -2  -5    2.19    4.29
  -1  -2  -5  166.42    9.58
  -1   2  -5  143.91   10.07
   1   2   5  157.07    7.73
   1  -2   5  170.79    8.52
  -1  -2  -5  159.12    7.96
  -1   2  -5  167.85    7.93
  -2  -2  -5  416.03   15.45
  -2   2  -5  422.92   16.02
   2   2   5  383.38   14.31
   2  -2   5  415.19   13.80
  -2  -2  -5  401.47   14.27
  -2   2  -5  450.54   15.18
  -3  -2  -5  143.05    8.89
  -3   2  -5  137.29    9.90
   3   2   5  163.41    8.72
   3  -2   5  144.22    7.68
  -3  -2  -5  144.17    8.26
  -3   2  -5  151.69    8.23
  -4  -2  -5   27.53    7.00
  -4   2  -5   34.99    6.79
   4   2   5   29.16    5.47
   4  -2   5   37.75    6.18
  -4  -2  -5   25.63    5.82
  -4   2  -5   24.69    4.63
  -5  -2  -5   11.51    7.33
  -5   2  -5    3.87    6.89
   5   2   5   11.05    4.60
   5  -2   5   12.69    6.38
  -5  -2  -5    9.33    5.11
  -5   2  -5   14.48    4.33
  -6  -2  -5    3.24    4.88
  -6   2  -5    2.74    5.82
   6   2   5    3.54    5.56
   6  -2   5    1.13    6.57
  -6  -2  -5    9.53    5.49
  -6   2  -5    3.16    4.89
[truncated: 482,306 more chars]
