# Supplementary material
Source: MDPI journal article supplement (https://www.mdpi.com/2073-4352/12/10/1443)
Supplement: s1 [file s1 › 2.cif]

 
data_shelx
 
_audit_creation_method            'SHELXL-2018/3'
_shelx_SHELXL_version_number      '2018/3'
_chemical_name_systematic         ?
_chemical_name_common             ?
_chemical_melting_point           ?
_chemical_formula_moiety          ?
_chemical_formula_sum
 'C8 H26 F13 Fe3 N4 O' 
_chemical_formula_weight          608.88

loop_
 _atom_type_symbol
 _atom_type_description
 _atom_type_scat_dispersion_real
 _atom_type_scat_dispersion_imag
 _atom_type_scat_source
 'Fe'  'Fe'   0.3463   0.8444
 'International Tables Vol C Tables 4.2.6.8 and 6.1.1.4'
 'F'  'F'   0.0171   0.0103
 'International Tables Vol C Tables 4.2.6.8 and 6.1.1.4'
 'C'  'C'   0.0033   0.0016
 'International Tables Vol C Tables 4.2.6.8 and 6.1.1.4'
 'N'  'N'   0.0061   0.0033
 'International Tables Vol C Tables 4.2.6.8 and 6.1.1.4'
 'O'  'O'   0.0106   0.0060
 'International Tables Vol C Tables 4.2.6.8 and 6.1.1.4'
 'H'  'H'   0.0000   0.0000
 'International Tables Vol C Tables 4.2.6.8 and 6.1.1.4'
 
_space_group_crystal_system       monoclinic
_space_group_IT_number            15
_space_group_name_H-M_alt         'C 2/c'
_space_group_name_Hall            '-C 2yc'
 
_shelx_space_group_comment
;
The symmetry employed for this shelxl refinement is uniquely defined
by the following loop, which should always be used as a source of
symmetry information in preference to the above space-group names.
They are only intended as comments.
;
 
loop_
 _space_group_symop_operation_xyz
 'x, y, z'
 '-x, y, -z+1/2'
 'x+1/2, y+1/2, z'
 '-x+1/2, y+1/2, -z+1/2'
 '-x, -y, -z'
 'x, -y, z-1/2'
 '-x+1/2, -y+1/2, -z'
 'x+1/2, -y+1/2, z-1/2'
 
_cell_length_a                    20.5365(14)
_cell_length_b                    13.5405(9)
_cell_length_c                    13.5727(9)
_cell_angle_alpha                 90
_cell_angle_beta                  92.588(4)
_cell_angle_gamma                 90
_cell_volume                      3770.4(4)
_cell_formula_units_Z             8
_cell_measurement_temperature     173(2)
_cell_measurement_reflns_used           984
_cell_measurement_theta_min             1.5
_cell_measurement_theta_max             27.5
 
_exptl_crystal_description              'Block'
_exptl_crystal_colour                   'Colorless'
_exptl_crystal_density_meas       ?
_exptl_crystal_density_method           'not measured'
_exptl_crystal_density_diffrn     2.145          
_exptl_crystal_F_000              2440
_exptl_transmission_factor_min    ?
_exptl_transmission_factor_max    ?
_exptl_crystal_size_max                 0.07
_exptl_crystal_size_mid                 0.06
_exptl_crystal_size_min                 0.03
_exptl_absorpt_coefficient_mu     2.410
_shelx_estimated_absorpt_T_min    ?
_shelx_estimated_absorpt_T_max    ?
_exptl_absorpt_correction_type         'Multi-scan'
_exptl_absorpt_correction_T_min   0.734
_exptl_absorpt_correction_T_max   1.000
_exptl_absorpt_process_details    'REQAB (Rigaku, 1998)'
_exptl_absorpt_special_details    ?
_diffrn_ambient_temperature       173(2)
_diffrn_radiation_wavelength      0.71075
_diffrn_radiation_type            MoK\a
_diffrn_source                    'Sealed Tube'
_diffrn_measurement_device
;
SCXMini: Fixed Chi 2 circle
;
_diffrn_measurement_device_type
;
Rigaku Mercury2 (2x2 bin mode)
;
_diffrn_measurement_method        'profile data from \w-scans'
_diffrn_detector_area_resol_mean  13.6612
_diffrn_reflns_number             15772
_diffrn_reflns_av_unetI/netI      0.1052
_diffrn_reflns_av_R_equivalents   0.1532
_diffrn_reflns_limit_h_min        -24
_diffrn_reflns_limit_h_max        24
_diffrn_reflns_limit_k_min        -16
_diffrn_reflns_limit_k_max        16
_diffrn_reflns_limit_l_min        -16
_diffrn_reflns_limit_l_max        16
_diffrn_reflns_theta_min          1.802
_diffrn_reflns_theta_max          24.998
_diffrn_reflns_theta_full         24.998
_diffrn_measured_fraction_theta_max   1.000
_diffrn_measured_fraction_theta_full  1.000
_diffrn_reflns_Laue_measured_fraction_max    1.000
_diffrn_reflns_Laue_measured_fraction_full   1.000
_diffrn_reflns_point_group_measured_fraction_max   1.000
_diffrn_reflns_point_group_measured_fraction_full  1.000
_reflns_number_total              3321
_reflns_number_gt                 1790
_reflns_threshold_expression      'I > 2\s(I)'
_reflns_Friedel_coverage          0.000
_reflns_Friedel_fraction_max      .
_reflns_Friedel_fraction_full     .
 
_reflns_special_details
;
 Reflections were merged by SHELXL according to the crystal
 class for the calculation of statistics and refinement.
 
 _reflns_Friedel_fraction is defined as the number of unique
 Friedel pairs measured divided by the number that would be
 possible theoretically, ignoring centric projections and
 systematic absences.
;
 
_computing_data_collection        
;
CrystalClear-SM Expert 2.1 b45 (Rigaku, 2015)
;
_computing_cell_refinement        
;
CrystalClear-SM Expert 2.1 b45 (Rigaku, 2015)
;
_computing_data_reduction         
;
CrystalClear-SM Expert 2.1 b45 (Rigaku, 2015)
;
_computing_structure_solution           'SHELXT 2018/2 (Sheldrick, 2018)'
_computing_structure_refinement 'SHELXL-2018/3 (Sheldrick, 2018)'
_computing_molecular_graphics          'Ortep for Windows (Farrugia, 2012)'
_computing_publication_material   'WinGX publication routines (Farrugia, 2012)'
_refine_special_details           ?
_refine_ls_structure_factor_coef  Fsqd
_refine_ls_matrix_type            full
_refine_ls_weighting_scheme       calc
_refine_ls_weighting_details
'w=1/[\s^2^(Fo^2^)+(0.0826P)^2^+9.3089P] where P=(Fo^2^+2Fc^2^)/3'
_atom_sites_solution_primary            'dual - dual-space method e.g. SHELXD'
_atom_sites_solution_secondary          'dual - dual-space method e.g. SHELXD'
_atom_sites_solution_hydrogens    geom
_refine_ls_hydrogen_treatment     constr
_refine_ls_extinction_method      none
_refine_ls_extinction_coef        .
_refine_ls_number_reflns          3321
_refine_ls_number_parameters      264
_refine_ls_number_restraints      0
_refine_ls_R_factor_all           0.1386
_refine_ls_R_factor_gt            0.0608
_refine_ls_wR_factor_ref          0.1790
_refine_ls_wR_factor_gt           0.1364
_refine_ls_goodness_of_fit_ref    1.014
_refine_ls_restrained_S_all       1.014
_refine_ls_shift/su_max           0.000
_refine_ls_shift/su_mean          0.000
 
loop_
 _atom_site_label
 _atom_site_type_symbol
 _atom_site_fract_x
 _atom_site_fract_y
 _atom_site_fract_z
 _atom_site_U_iso_or_equiv
 _atom_site_adp_type
 _atom_site_occupancy
 _atom_site_site_symmetry_order  
 _atom_site_calc_flag
 _atom_site_refinement_flags_posn
 _atom_site_refinement_flags_adp
 _atom_site_refinement_flags_occupancy
 _atom_site_disorder_assembly
 _atom_site_disorder_group
Fe1 Fe 0.66274(6) 0.03223(10) 0.20761(9) 0.0238(3) Uani 1 1 d . . . . .
Fe2 Fe 0.68844(6) 0.48591(10) 0.26129(9) 0.0271(4) Uani 1 1 d . . . . .
Fe3 Fe 0.57329(7) 0.27294(10) 0.22800(10) 0.0294(4) Uani 1 1 d . . . . .
F1 F 0.7494(2) 0.5975(3) 0.2875(4) 0.0272(12) Uani 1 1 d . . . . .
F2 F 0.7229(2) -0.0799(4) 0.2279(4) 0.0283(12) Uani 1 1 d . . . . .
F3 F 0.6548(2) 0.0438(4) 0.3464(3) 0.0301(12) Uani 1 1 d . . . . .
F4 F 0.6986(2) 0.5013(4) 0.1237(3) 0.0316(13) Uani 1 1 d . . . . .
F5 F 0.6696(2) 0.0260(4) 0.0699(3) 0.0315(12) Uani 1 1 d . . . . .
F6 F 0.6794(2) 0.4586(4) 0.3977(4) 0.0362(13) Uani 1 1 d . . . . .
F7 F 0.500000 0.1802(5) 0.250000 0.0369(19) Uani 1 2 d S T P . .
F8 F 0.5523(3) 0.2973(4) 0.0945(4) 0.0389(14) Uani 1 1 d . . . . .
F9 F 0.5828(3) -0.0351(5) 0.2014(4) 0.0449(15) Uani 1 1 d . . . . .
F10 F 0.500000 0.3688(5) 0.250000 0.0362(19) Uani 1 2 d S T P . .
F11 F 0.5920(3) 0.2679(4) 0.3624(4) 0.0431(15) Uani 1 1 d . . . . .
F12 F 0.6256(3) 0.1626(4) 0.1902(4) 0.0496(16) Uani 1 1 d . . . . .
F13 F 0.6461(3) 0.3629(5) 0.2231(4) 0.0531(17) Uani 1 1 d . . . . .
F14 F 0.6152(3) 0.5666(5) 0.2613(4) 0.0574(18) Uani 1 1 d . . . . .
N1 N 0.5305(4) 0.0173(6) 0.4081(5) 0.036(2) Uani 1 1 d . . . . .
H1A H 0.569664 0.026783 0.370524 0.044 Uiso 1 1 calc R U . . .
H1B H 0.492433 0.020560 0.362017 0.044 Uiso 1 1 calc R U . . .
N2 N 0.7692(5) 0.2183(7) 0.4062(7) 0.059(3) Uani 1 1 d . . . . .
H2A H 0.737453 0.251738 0.361618 0.071 Uiso 1 1 calc R U . . .
H2B H 0.798501 0.180010 0.365930 0.071 Uiso 1 1 calc R U . . .
N3 N 0.7419(4) 0.3538(6) 0.0192(6) 0.041(2) Uani 1 1 d . . . . .
H3A H 0.723342 0.407567 0.057347 0.050 Uiso 1 1 calc R U . . .
H3B H 0.768704 0.383397 -0.030959 0.050 Uiso 1 1 calc R U . . .
N4 N 0.5435(4) 0.4548(7) 0.4348(7) 0.050(3) Uani 1 1 d . . . . .
H4A H 0.517400 0.399602 0.407941 0.060 Uiso 1 1 calc R U . . .
H4B H 0.585742 0.453318 0.403920 0.060 Uiso 1 1 calc R U . . .
C1 C 0.7343(4) 0.1502(5) 0.4714(6) 0.0158(17) Uani 1 1 d . . . . .
H1C H 0.707946 0.103812 0.431049 0.019 Uiso 1 1 calc R U . . .
H1D H 0.766000 0.112036 0.511797 0.019 Uiso 1 1 calc R U . . .
C2 C 0.8081(5) 0.2944(7) 0.4643(7) 0.034(2) Uani 1 1 d . . . . .
H2C H 0.842632 0.261689 0.504312 0.041 Uiso 1 1 calc R U . . .
H2D H 0.828582 0.339935 0.418940 0.041 Uiso 1 1 calc R U . . .
C3 C 0.5264(5) 0.0959(7) 0.4825(8) 0.038(3) Uani 1 1 d . . . . .
H3C H 0.523553 0.160306 0.449608 0.046 Uiso 1 1 calc R U . . .
H3D H 0.565805 0.095332 0.525918 0.046 Uiso 1 1 calc R U . . .
C4 C 0.5540(5) 0.4414(9) 0.5424(8) 0.046(3) Uani 1 1 d . . . . .
H4C H 0.584652 0.491361 0.568745 0.056 Uiso 1 1 calc R U . . .
H4D H 0.572829 0.376044 0.556237 0.056 Uiso 1 1 calc R U . . .
C5 C 0.7839(6) 0.2909(8) 0.0862(8) 0.045(3) Uani 1 1 d . . . . .
H5A H 0.758071 0.265981 0.139923 0.054 Uiso 1 1 calc R U . . .
H5B H 0.819637 0.330699 0.115348 0.054 Uiso 1 1 calc R U . . .
C6 C 0.5331(5) -0.0806(8) 0.4569(8) 0.042(3) Uani 1 1 d . . . . .
H6A H 0.572605 -0.085263 0.499825 0.051 Uiso 1 1 calc R U . . .
H6B H 0.534825 -0.132606 0.406842 0.051 Uiso 1 1 calc R U . . .
C7 C 0.5100(6) 0.5490(8) 0.4089(8) 0.045(3) Uani 1 1 d . . . . .
H7A H 0.502319 0.552497 0.337190 0.054 Uiso 1 1 calc R U . . .
H7B H 0.538211 0.604348 0.429143 0.054 Uiso 1 1 calc R U . . .
C8 C 0.6882(5) 0.2961(8) -0.0302(8) 0.043(3) Uani 1 1 d . . . . .
H8A H 0.662992 0.338706 -0.076147 0.051 Uiso 1 1 calc R U . . .
H8B H 0.658801 0.271564 0.019227 0.051 Uiso 1 1 calc R U . . .
O1S O 0.5662(8) -0.2458(10) 0.2249(16) 0.189(8) Uani 1 1 d . . . . .
 
loop_
 _atom_site_aniso_label
 _atom_site_aniso_U_11
 _atom_site_aniso_U_22
 _atom_site_aniso_U_33
 _atom_site_aniso_U_23
 _atom_site_aniso_U_13
 _atom_site_aniso_U_12
Fe1 0.0213(7) 0.0292(7) 0.0208(7) 0.0001(6) 0.0005(5) 0.0006(6)
Fe2 0.0220(7) 0.0382(8) 0.0213(7) -0.0025(6) 0.0015(5) -0.0010(6)
Fe3 0.0290(8) 0.0265(7) 0.0324(8) 0.0016(6) -0.0001(6) -0.0002(6)
F1 0.022(3) 0.027(3) 0.032(3) -0.001(2) 0.000(2) 0.006(2)
F2 0.026(3) 0.025(3) 0.033(3) -0.004(2) 0.000(2) 0.000(2)
F3 0.028(3) 0.044(3) 0.019(3) -0.005(2) 0.006(2) -0.006(2)
F4 0.037(3) 0.037(3) 0.021(3) -0.004(2) 0.000(2) 0.003(2)
F5 0.035(3) 0.043(3) 0.017(3) 0.000(2) -0.001(2) 0.004(3)
F6 0.033(3) 0.052(4) 0.024(3) 0.001(3) 0.005(2) -0.004(3)
F7 0.033(4) 0.025(4) 0.053(5) 0.000 0.010(4) 0.000
F8 0.037(3) 0.050(4) 0.030(3) 0.004(3) 0.003(3) 0.002(3)
F9 0.032(3) 0.065(4) 0.037(3) 0.004(3) -0.006(3) -0.015(3)
F10 0.035(5) 0.032(4) 0.042(5) 0.000 0.007(4) 0.000
F11 0.043(3) 0.059(4) 0.028(3) 0.004(3) -0.003(3) 0.004(3)
F12 0.054(4) 0.042(3) 0.053(4) 0.003(3) 0.006(3) 0.021(3)
F13 0.053(4) 0.062(4) 0.045(4) -0.007(3) 0.003(3) -0.033(3)
F14 0.035(4) 0.092(5) 0.044(4) -0.008(3) -0.005(3) 0.023(3)
N1 0.029(5) 0.062(6) 0.020(4) -0.007(4) 0.004(3) -0.013(4)
N2 0.071(7) 0.050(6) 0.054(6) -0.014(5) -0.010(5) 0.004(5)
N3 0.063(6) 0.023(4) 0.041(5) -0.005(4) 0.027(5) -0.001(4)
N4 0.041(5) 0.060(7) 0.051(6) -0.021(5) 0.015(4) -0.005(5)
C1 0.023(4) 0.006(4) 0.018(4) -0.003(3) -0.003(3) -0.005(3)
C2 0.036(6) 0.026(5) 0.038(6) -0.002(5) -0.003(5) -0.006(4)
C3 0.040(6) 0.031(6) 0.043(6) 0.008(5) -0.012(5) -0.012(5)
C4 0.027(6) 0.074(8) 0.038(6) -0.015(6) -0.005(5) 0.003(5)
C5 0.065(8) 0.037(6) 0.034(6) 0.006(5) 0.008(5) -0.010(6)
C6 0.041(6) 0.046(7) 0.039(6) 0.001(5) -0.002(5) 0.003(5)
C7 0.060(8) 0.039(7) 0.036(6) 0.001(5) 0.013(5) -0.006(6)
C8 0.046(7) 0.039(7) 0.045(6) 0.009(5) 0.023(5) 0.005(5)
O1S 0.167(15) 0.086(10) 0.31(2) 0.032(12) 0.019(15) -0.021(10)
 
_geom_special_details
;
 All esds (except the esd in the dihedral angle between two l.s. planes)
 are estimated using the full covariance matrix.  The cell esds are taken
 into account individually in the estimation of esds in distances, angles
 and torsion angles; correlations between esds in cell parameters are only
 used when they are defined by crystal symmetry.  An approximate (isotropic)
 treatment of cell esds is used for estimating esds involving l.s. planes.
;
 
loop_
 _geom_bond_atom_site_label_1
 _geom_bond_atom_site_label_2
 _geom_bond_distance
 _geom_bond_site_symmetry_2
 _geom_bond_publ_flag
Fe1 F9 1.875(5) . ?
Fe1 F5 1.883(5) . ?
Fe1 F3 1.904(5) . ?
Fe1 F12 1.933(6) . ?
Fe1 F2 1.968(5) . ?
Fe1 F1 2.008(5) 4_645 ?
Fe2 F14 1.859(6) . ?
Fe2 F4 1.900(5) . ?
Fe2 F6 1.905(5) . ?
Fe2 F13 1.938(6) . ?
Fe2 F1 1.984(5) . ?
Fe2 F2 2.027(5) 4_655 ?
Fe3 F11 1.849(5) . ?
Fe3 F8 1.873(5) . ?
Fe3 F12 1.924(6) . ?
Fe3 F13 1.932(6) . ?
Fe3 F7 1.993(5) . ?
Fe3 F10 2.020(5) . ?
N1 C3 1.472(12) . ?
N1 C6 1.482(13) . ?
N1 H1A 0.9800 . ?
N1 H1B 0.9800 . ?
N2 C1 1.484(12) . ?
N2 C2 1.504(13) . ?
N2 H2A 0.9800 . ?
N2 H2B 0.9800 . ?
N3 C8 1.488(14) . ?
N3 C5 1.492(13) . ?
N3 H3A 0.9800 . ?
N3 H3B 0.9800 . ?
N4 C4 1.479(13) . ?
N4 C7 1.484(14) . ?
N4 H4A 0.9800 . ?
N4 H4B 0.9800 . ?
C1 C2 1.466(12) 7_656 ?
C1 H1C 0.9800 . ?
C1 H1D 0.9800 . ?
C2 H2C 0.9800 . ?
C2 H2D 0.9800 . ?
C3 C6 1.517(14) 5_656 ?
C3 H3C 0.9800 . ?
C3 H3D 0.9800 . ?
C4 C7 1.503(15) 5_666 ?
C4 H4C 0.9800 . ?
C4 H4D 0.9800 . ?
C5 C8 1.528(14) 7_655 ?
C5 H5A 0.9800 . ?
C5 H5B 0.9800 . ?
C6 H6A 0.9800 . ?
C6 H6B 0.9800 . ?
C7 H7A 0.9800 . ?
C7 H7B 0.9800 . ?
C8 H8A 0.9800 . ?
C8 H8B 0.9800 . ?
 
loop_
 _geom_angle_atom_site_label_1
 _geom_angle_atom_site_label_2
 _geom_angle_atom_site_label_3
 _geom_angle
 _geom_angle_site_symmetry_1
 _geom_angle_site_symmetry_3
 _geom_angle_publ_flag
F9 Fe1 F5 92.2(2) . . ?
F9 Fe1 F3 88.3(2) . . ?
F5 Fe1 F3 177.8(2) . . ?
F9 Fe1 F12 95.7(3) . . ?
F5 Fe1 F12 88.1(2) . . ?
F3 Fe1 F12 89.7(2) . . ?
F9 Fe1 F2 100.0(2) . . ?
F5 Fe1 F2 91.7(2) . . ?
F3 Fe1 F2 90.3(2) . . ?
F12 Fe1 F2 164.3(2) . . ?
F9 Fe1 F1 177.0(3) . 4_645 ?
F5 Fe1 F1 86.9(2) . 4_645 ?
F3 Fe1 F1 92.7(2) . 4_645 ?
F12 Fe1 F1 87.2(2) . 4_645 ?
F2 Fe1 F1 77.2(2) . 4_645 ?
F14 Fe2 F4 93.5(3) . . ?
F14 Fe2 F6 90.0(3) . . ?
F4 Fe2 F6 175.0(2) . . ?
F14 Fe2 F13 98.7(3) . . ?
F4 Fe2 F13 84.2(2) . . ?
F6 Fe2 F13 91.7(2) . . ?
F14 Fe2 F1 93.2(3) . . ?
F4 Fe2 F1 89.8(2) . . ?
F6 Fe2 F1 93.6(2) . . ?
F13 Fe2 F1 166.9(2) . . ?
F14 Fe2 F2 169.3(3) . 4_655 ?
F4 Fe2 F2 88.9(2) . 4_655 ?
F6 Fe2 F2 88.3(2) . 4_655 ?
F13 Fe2 F2 91.9(2) . 4_655 ?
F1 Fe2 F2 76.4(2) . 4_655 ?
F11 Fe3 F8 171.9(3) . . ?
F11 Fe3 F12 98.1(3) . . ?
F8 Fe3 F12 89.1(3) . . ?
F11 Fe3 F13 86.0(3) . . ?
F8 Fe3 F13 90.0(3) . . ?
F12 Fe3 F13 92.2(3) . . ?
F11 Fe3 F7 87.34(19) . . ?
F8 Fe3 F7 96.54(18) . . ?
F12 Fe3 F7 89.2(3) . . ?
F13 Fe3 F7 173.34(19) . . ?
F11 Fe3 F10 90.07(19) . . ?
F8 Fe3 F10 83.69(17) . . ?
F12 Fe3 F10 165.4(2) . . ?
F13 Fe3 F10 100.5(3) . . ?
F7 Fe3 F10 79.1(2) . . ?
Fe2 F1 Fe1 103.3(2) . 4_655 ?
Fe1 F2 Fe2 103.1(2) . 4_645 ?
Fe3 F7 Fe3 101.9(3) 2_655 . ?
Fe3 F10 Fe3 100.0(3) 2_655 . ?
Fe3 F12 Fe1 154.0(4) . . ?
Fe3 F13 Fe2 150.6(4) . . ?
C3 N1 C6 110.0(8) . . ?
C3 N1 H1A 109.7 . . ?
C6 N1 H1A 109.7 . . ?
C3 N1 H1B 109.7 . . ?
C6 N1 H1B 109.7 . . ?
H1A N1 H1B 108.2 . . ?
C1 N2 C2 111.9(8) . . ?
C1 N2 H2A 109.2 . . ?
C2 N2 H2A 109.2 . . ?
C1 N2 H2B 109.2 . . ?
C2 N2 H2B 109.2 . . ?
H2A N2 H2B 107.9 . . ?
C8 N3 C5 111.8(8) . . ?
C8 N3 H3A 109.3 . . ?
C5 N3 H3A 109.3 . . ?
C8 N3 H3B 109.3 . . ?
C5 N3 H3B 109.3 . . ?
H3A N3 H3B 107.9 . . ?
C4 N4 C7 112.6(9) . . ?
C4 N4 H4A 109.1 . . ?
C7 N4 H4A 109.1 . . ?
C4 N4 H4B 109.1 . . ?
C7 N4 H4B 109.1 . . ?
H4A N4 H4B 107.8 . . ?
C2 C1 N2 110.6(7) 7_656 . ?
C2 C1 H1C 109.5 7_656 . ?
N2 C1 H1C 109.5 . . ?
C2 C1 H1D 109.5 7_656 . ?
N2 C1 H1D 109.5 . . ?
H1C C1 H1D 108.1 . . ?
C1 C2 N2 110.3(8) 7_656 . ?
C1 C2 H2C 109.6 7_656 . ?
N2 C2 H2C 109.6 . . ?
C1 C2 H2D 109.6 7_656 . ?
N2 C2 H2D 109.6 . . ?
H2C C2 H2D 108.1 . . ?
N1 C3 C6 110.3(8) . 5_656 ?
N1 C3 H3C 109.6 . . ?
C6 C3 H3C 109.6 5_656 . ?
N1 C3 H3D 109.6 . . ?
C6 C3 H3D 109.6 5_656 . ?
H3C C3 H3D 108.1 . . ?
N4 C4 C7 109.4(8) . 5_666 ?
N4 C4 H4C 109.8 . . ?
C7 C4 H4C 109.8 5_666 . ?
N4 C4 H4D 109.8 . . ?
C7 C4 H4D 109.8 5_666 . ?
H4C C4 H4D 108.2 . . ?
N3 C5 C8 110.9(8) . 7_655 ?
N3 C5 H5A 109.5 . . ?
C8 C5 H5A 109.5 7_655 . ?
N3 C5 H5B 109.5 . . ?
C8 C5 H5B 109.5 7_655 . ?
H5A C5 H5B 108.0 . . ?
N1 C6 C3 110.6(8) . 5_656 ?
N1 C6 H6A 109.5 . . ?
C3 C6 H6A 109.5 5_656 . ?
N1 C6 H6B 109.5 . . ?
C3 C6 H6B 109.5 5_656 . ?
H6A C6 H6B 108.1 . . ?
N4 C7 C4 112.1(9) . 5_666 ?
N4 C7 H7A 109.2 . . ?
C4 C7 H7A 109.2 5_666 . ?
N4 C7 H7B 109.2 . . ?
C4 C7 H7B 109.2 5_666 . ?
H7A C7 H7B 107.9 . . ?
N3 C8 C5 110.0(9) . 7_655 ?
N3 C8 H8A 109.7 . . ?
C5 C8 H8A 109.7 7_655 . ?
N3 C8 H8B 109.7 . . ?
C5 C8 H8B 109.7 7_655 . ?
H8A C8 H8B 108.2 . . ?
 
_refine_diff_density_max    1.004
_refine_diff_density_min   -0.770
_refine_diff_density_rms    0.160

_shelx_res_file
;
TITL shelxt_a.res in C2/c
    shelx.res
    created by SHELXL-2018/3 at 16:11:36 on 20-Oct-2020
REM Old TITL  TENG138

REM SHELXT solution in C2/c
REM R1 0.196,  Rweak 0.015,  Alpha 0.039,  Orientation as input
REM Formula found by SHELXT:  Fe6 F19 C18 N6 O7

CELL  0.71075  20.5365  13.5405  13.5727   90.000   92.588   90.000
ZERR    8.000   0.0014   0.0009   0.0009    0.000    0.004    0.000
LATT  7
SYMM -X, Y, 1/2-Z
SFAC FE F C N O H
UNIT 24  104 64 32 8 208
L.S. 10
OMIT -3 50
ACTA
BOND $H
LIST 4
FMAP 2
PLAN 5
WGHT    0.082600    9.308908
FVAR       0.04853   0.68402
FE1   1    0.662740    0.032226    0.207609    11.00000    0.02129    0.02916 =
         0.02079    0.00007    0.00050    0.00057
FE2   1    0.688442    0.485908    0.261294    11.00000    0.02199    0.03817 =
         0.02126   -0.00254    0.00146   -0.00101
FE3   1    0.573287    0.272936    0.227997    11.00000    0.02903    0.02655 =
         0.03238    0.00157   -0.00011   -0.00024
F1    2    0.749391    0.597522    0.287465    11.00000    0.02241    0.02651 =
         0.03245   -0.00091    0.00006    0.00594
F2    2    0.722884   -0.079882    0.227872    11.00000    0.02597    0.02537 =
         0.03346   -0.00439   -0.00038    0.00015
F3    2    0.654838    0.043770    0.346390    11.00000    0.02831    0.04396 =
         0.01865   -0.00515    0.00622   -0.00558
F4    2    0.698637    0.501278    0.123733    11.00000    0.03670    0.03694 =
         0.02098   -0.00445    0.00036    0.00342
F5    2    0.669593    0.026001    0.069889    11.00000    0.03497    0.04261 =
         0.01663   -0.00045   -0.00110    0.00351
F6    2    0.679366    0.458554    0.397656    11.00000    0.03298    0.05154 =
         0.02442    0.00132    0.00479   -0.00401
F7    2    0.500000    0.180187    0.250000    10.50000    0.03329    0.02500 =
         0.05312    0.00000    0.00961    0.00000
F8    2    0.552347    0.297256    0.094450    11.00000    0.03702    0.04954 =
         0.03014    0.00375    0.00307    0.00242
F9    2    0.582842   -0.035054    0.201406    11.00000    0.03191    0.06466 =
         0.03742    0.00408   -0.00639   -0.01515
F10   2    0.500000    0.368815    0.250000    10.50000    0.03496    0.03182 =
         0.04232    0.00000    0.00686    0.00000
F11   2    0.592026    0.267864    0.362421    11.00000    0.04254    0.05863 =
         0.02773    0.00424   -0.00332    0.00429
F12   2    0.625648    0.162632    0.190199    11.00000    0.05423    0.04200 =
         0.05280    0.00281    0.00625    0.02149
F13   2    0.646095    0.362934    0.223111    11.00000    0.05256    0.06193 =
         0.04488   -0.00652    0.00310   -0.03258
F14   2    0.615220    0.566609    0.261259    11.00000    0.03535    0.09179 =
         0.04432   -0.00773   -0.00466    0.02345
N1    4    0.530505    0.017316    0.408105    11.00000    0.02875    0.06150 =
         0.01951   -0.00708    0.00430   -0.01318
AFIX  23  0.9800
H1A   6    0.569664    0.026783    0.370524    11.00000   -1.20000
H1B   6    0.492433    0.020560    0.362017    11.00000   -1.20000
AFIX   0
N2    4    0.769176    0.218300    0.406227    11.00000    0.07137    0.04982 =
         0.05412   -0.01429   -0.00972    0.00378
AFIX  23  0.9800
H2A   6    0.737453    0.251738    0.361618    11.00000   -1.20000
H2B   6    0.798501    0.180010    0.365930    11.00000   -1.20000
AFIX   0
N3    4    0.741910    0.353843    0.019208    11.00000    0.06320    0.02252 =
         0.04066   -0.00514    0.02680   -0.00091
AFIX  23  0.9800
H3A   6    0.723342    0.407567    0.057347    11.00000   -1.20000
H3B   6    0.768704    0.383397   -0.030959    11.00000   -1.20000
AFIX   0
N4    4    0.543513    0.454770    0.434752    11.00000    0.04083    0.06039 =
         0.05097   -0.02116    0.01455   -0.00476
AFIX  23  0.9800
H4A   6    0.517400    0.399602    0.407941    11.00000   -1.20000
H4B   6    0.585742    0.453318    0.403920    11.00000   -1.20000
AFIX   0
C1    3    0.734265    0.150224    0.471407    11.00000    0.02302    0.00593 =
         0.01800   -0.00291   -0.00290   -0.00548
AFIX  23  0.9800
H1C   6    0.707946    0.103812    0.431049    11.00000   -1.20000
H1D   6    0.766000    0.112036    0.511797    11.00000   -1.20000
AFIX   0
C2    3    0.808058    0.294378    0.464284    11.00000    0.03640    0.02637 =
         0.03818   -0.00218   -0.00323   -0.00616
AFIX  23  0.9800
H2C   6    0.842632    0.261689    0.504312    11.00000   -1.20000
H2D   6    0.828582    0.339935    0.418940    11.00000   -1.20000
AFIX   0
C3    3    0.526381    0.095900    0.482458    11.00000    0.03997    0.03069 =
         0.04309    0.00753   -0.01236   -0.01248
AFIX  23  0.9800
H3C   6    0.523553    0.160306    0.449608    11.00000   -1.20000
H3D   6    0.565805    0.095332    0.525918    11.00000   -1.20000
AFIX   0
C4    3    0.554046    0.441390    0.542407    11.00000    0.02714    0.07370 =
         0.03792   -0.01541   -0.00494    0.00305
AFIX  23  0.9800
H4C   6    0.584652    0.491361    0.568745    11.00000   -1.20000
H4D   6    0.572829    0.376044    0.556237    11.00000   -1.20000
AFIX   0
C5    3    0.783870    0.290873    0.086225    11.00000    0.06504    0.03668 =
         0.03360    0.00623    0.00797   -0.00964
AFIX  23  0.9800
H5A   6    0.758071    0.265981    0.139923    11.00000   -1.20000
H5B   6    0.819637    0.330699    0.115348    11.00000   -1.20000
AFIX   0
C6    3    0.533053   -0.080637    0.456901    11.00000    0.04094    0.04619 =
         0.03879    0.00080   -0.00199    0.00272
AFIX  23  0.9800
H6A   6    0.572605   -0.085263    0.499825    11.00000   -1.20000
H6B   6    0.534825   -0.132606    0.406842    11.00000   -1.20000
AFIX   0
C7    3    0.509953    0.548958    0.408899    11.00000    0.06035    0.03933 =
         0.03630    0.00086    0.01276   -0.00594
AFIX  23  0.9800
H7A   6    0.502319    0.552497    0.337190    11.00000   -1.20000
H7B   6    0.538211    0.604348    0.429143    11.00000   -1.20000
AFIX   0
C8    3    0.688168    0.296075   -0.030196    11.00000    0.04605    0.03883 =
         0.04540    0.00916    0.02287    0.00478
AFIX  23  0.9800
H8A   6    0.662992    0.338706   -0.076147    11.00000   -1.20000
H8B   6    0.658801    0.271564    0.019227    11.00000   -1.20000
AFIX   0
O1S   5    0.566180   -0.245819    0.224858    11.00000    0.16702    0.08579 =
         0.31375    0.03194    0.01912   -0.02076

HKLF 4


REM  shelxt_a.res in C2/c
REM wR2 = 0.1790, GooF = S = 1.014, Restrained GooF = 1.014 for all data
REM R1 = 0.0608 for 1790 Fo > 4sig(Fo) and 0.1386 for all 3321 data
REM 264 parameters refined using 0 restraints

END

WGHT      0.0802     12.8786

REM Highest difference peak  1.004,  deepest hole -0.770,  1-sigma level  0.160
Q1    1   0.5799 -0.2694  0.3057  11.00000  0.05    1.00
Q2    1   0.5000  0.0446  0.2500  10.50000  0.05    0.72
Q3    1   0.5891  0.2284  0.3002  11.00000  0.05    0.66
Q4    1   0.7467  0.1213  0.4785  11.00000  0.05    0.65
Q5    1   0.7283  0.1564  0.4343  11.00000  0.05    0.64
;
_shelx_res_checksum   14402

_shelx_hkl_file
;
   0   0  -1    1.71    1.74   1 0.02321 0.05497 0.99943 0.99629 0.02438 0.06612
   0   0   1   -0.15    1.93   1 0.06725 0.03549 0.99611 0.99925 0.05676 0.01502
   0   0   1   -1.97    1.44   1-0.74962-0.78190-0.28250-0.27958 0.59853 0.55718
   0   0   1   -0.14    1.70   1-0.73546-0.76771 0.25319 0.25647 0.62848 0.58722
   0   0  -1    0.82    1.27   1-0.75666-0.72440 0.29808 0.29480 0.58189 0.62315
   0   0   2  582.82    8.96   1 0.08922 0.02570 0.99333 0.99961 0.07292-0.01056
   0   0  -2  603.63   10.34   1-0.77925-0.71470-0.35507-0.36091 0.51641 0.59911
   0   0   2  608.87   10.46   1-0.72356-0.78807 0.23024 0.23682 0.65072 0.56820
   0   0   3   -0.65    2.13   1 0.11114 0.01586 0.98980 0.99921 0.08904-0.03618
   0   0  -3   -0.48    1.90   1-0.78694-0.69012-0.37835-0.38711 0.48740 0.61145
   0   0   3   -0.17    1.98   1-0.71079-0.80756 0.20697 0.21683 0.67225 0.54847
   0   0   4  526.36    9.14   1 0.13388 0.00647 0.98533 0.99813 0.10576-0.06065
   0   0  -4  517.04   10.19   1-0.79353-0.66443-0.40117-0.41285 0.45756 0.62295
   0   0   4  513.56    9.71   1-0.69715-0.82617 0.18336 0.19651 0.69307 0.52803
   0   0   5   -1.90    2.49   1 0.15568-0.00357 0.98026 0.99626 0.12179-0.08622
   0   0  -5    1.86    1.83   1-0.79899-0.63762-0.42353-0.43813 0.42687 0.63362
   0   0   5   -2.96    1.92   1-0.68261-0.84388 0.15942 0.17585 0.71317 0.50687
   0   0   6  452.91    9.17   1 0.17745-0.01366 0.97443 0.99363 0.13780-0.11182
   0   0  -6  464.25    9.49   1-0.80331-0.60966-0.44541-0.46293 0.39532 0.64342
   0   0   6  432.96    9.24   1-0.66729-0.86066 0.13530 0.15531 0.73240 0.48489
   0   0   7    0.52    2.09   1 0.19918-0.02378 0.96782 0.99022 0.15378-0.13745
   0   0  -7    0.56    2.56   1-0.80646-0.58054-0.46681-0.48724 0.36290 0.65235
   0   0   7   -0.52    2.21   1-0.65095-0.87656 0.11070 0.13404 0.75099 0.46224
   0   0   8   36.92    3.39   1 0.22086-0.03395 0.96042 0.98602 0.16972-0.16311
   0   0  -8   39.86    2.86   1-0.80840-0.55021-0.48770-0.51105 0.32957 0.66036
   0   0   8   37.99    2.68   1-0.63367-0.89151 0.08573 0.11240 0.76883 0.43882
   0   0   9    5.60    2.89   1 0.24251-0.04416 0.95222 0.98102 0.18564-0.18880
   0   0  -9   -1.40    2.06   1-0.80910-0.51863-0.50808-0.53435 0.29530 0.66744
   0   0   9    2.84    2.46   1-0.61542-0.90549 0.06039 0.09040 0.78587 0.41462
   0   0  10    0.61    2.13   1 0.26411-0.05441 0.94320 0.97520 0.20152-0.21452
   0   0 -10   -3.03    2.59   1-0.80849-0.48575-0.52791-0.55710 0.26005 0.67355
   0   0  10   -0.06    2.13   1-0.59617-0.91846 0.03468 0.06802 0.80210 0.38960
   0   0  11    5.00    3.21   1 0.28567-0.06470 0.93334 0.96854 0.21738-0.24027
   0   0 -11   -5.17    2.30   1-0.80653-0.45151-0.54719-0.57929 0.22379 0.67863
   0   0  11    4.45    2.69   1-0.57588-0.93040 0.00856 0.04524 0.81748 0.36373
   0   0  12   -1.89    2.93   1 0.30719-0.07504 0.92263 0.96103 0.23320-0.26605
   0   0 -12    7.53    3.08   1-0.80313-0.41584-0.56586-0.60089 0.18644 0.68264
   0   0  12    1.29    2.90   1-0.55450-0.94125-0.01795 0.02205 0.83198 0.33698
   0   0  13   -0.15    2.59   1 0.32866-0.08542 0.91103 0.95263 0.24899-0.29187
   0   0 -13    0.70    2.25   1-0.79825-0.37853-0.58380-0.62176 0.14819 0.68565
   0   0  13   -0.47    3.39   1-0.53198-0.95095-0.04492-0.00157 0.84556 0.30931
   0   0  14    6.47    3.73   1 0.35008-0.09585 0.89852 0.94332 0.26475-0.31772
   0   0 -14    1.39    3.12   1-0.79171-0.33970-0.60118-0.64206 0.10847 0.68728
   0   0  14    1.77    3.16   1-0.50825-0.95946-0.07233-0.02565 0.85816 0.28065
   0   0  15    0.44    3.67   1 0.37146-0.10632 0.88507 0.93307 0.28046-0.34361
   0   0 -15   -2.19    3.11   1-0.78341-0.29912-0.61782-0.66162 0.06743 0.68758
   0   0  15    4.78    3.25   1-0.48392-0.96678-0.09951-0.04866 0.86943 0.25092
   0   0  16    6.01    3.43   1 0.39278-0.11685 0.87063 0.92183 0.29615-0.36953
   0   0 -17   -2.16    3.71   1-0.42331 0.11912-0.85346-0.90762-0.30397 0.40252
   0  -2   0  392.34    7.34   1-0.78084-0.82340 0.26253 0.16992-0.56688-0.54141
   0  -2   0  395.64    7.43   1 0.24821 0.20635-0.31055-0.40340-0.91757-0.89144
   0   2   0  384.76    8.11   1-0.80078-0.75772 0.43194 0.52423 0.41493 0.38862
   0  -2   1   -0.06    1.91   1-0.60733-0.68171 0.66193 0.57247-0.43929-0.45555
   0  -2  -1    2.54    2.28   1-0.78550-0.79642-0.24026-0.33578-0.57031-0.50294
   0  -2  -1    1.86    3.54   1-0.04684-0.05648-0.52276-0.61853-0.85118-0.78372
   0   2  -1   -0.87    2.30   1-0.44405-0.36973 0.14214 0.23190 0.88465 0.89973
   0   2   1   -0.87    1.87   1-0.78401-0.77321 0.36914 0.46471 0.49905 0.43148
   0   2  -1   -2.21    1.53   1-0.80175-0.72644 0.57165 0.66066 0.17438 0.18919
   0  -2   1    0.84    1.59   1-0.68950-0.76481 0.69490 0.60588-0.20417-0.21899
   0  -2   2   78.50    3.64   1-0.42388-0.52994 0.85303 0.76666-0.30439-0.36247
   0  -2  -2   78.33    3.52   1-0.66834-0.64736-0.56471-0.66341-0.48415-0.37523
   0  -2  -2   72.01    4.39   1-0.37329-0.35068-0.67559-0.77420-0.63578-0.52690
   0   2  -2   75.17    3.47   1-0.55629-0.44970 0.01577 0.10261 0.83083 0.88726
   0  -2   2   75.25    3.10   1 0.18327 0.07543-0.60941-0.69468 0.77137 0.71534
   0   2   2   76.20    3.72   1-0.76868-0.79013 0.32680 0.42566 0.54983 0.44101
   0  -2   3    2.27    2.56   1-0.28726-0.42509 0.93589 0.85266-0.20392-0.30375
   0  -2  -3    3.49    2.23   1-0.56383-0.51093-0.71846-0.82035-0.40730-0.25682
   0  -2  -3    2.50    1.70   1-0.58583-0.53094-0.71223-0.81375-0.38666-0.23643
   0   2  -3    1.36    1.91   1-0.62777-0.48891-0.07743 0.00648 0.77453 0.87230
   0  -2   3   -1.16    2.29   1-0.37995-0.51976-0.20640-0.28837 0.90168 0.80416
   0   2  -3    1.63    1.89   1-0.71818-0.57837 0.22029 0.30271 0.66005 0.75752
   0   2   3    0.53    2.60   1-0.75407-0.80778 0.29227 0.39441 0.58817 0.43808
   0  -2   4    3.34    2.43   1-0.18775-0.35735 0.97347 0.89338-0.13075-0.27231
   0  -2  -4    3.65    2.17   1-0.49601-0.41121-0.79133-0.89640-0.35743-0.16539
   0  -2  -4    3.29    2.06   1-0.68605-0.59889-0.69615-0.80058-0.21141-0.01984
   0   2  -4    2.17    2.09   1-0.67655-0.50541-0.14974-0.06875 0.72100 0.86013
   0  -2   4    3.71    1.74   1-0.49800-0.67000-0.08390-0.16247 0.86310 0.72435
   0   2   4    4.91    2.42   1-0.73953-0.82550 0.26138 0.36681 0.62029 0.42894
   0  -2   5   16.96    2.75   1-0.11182-0.31312 0.99089 0.91391-0.07491-0.25827
   0  -2  -5   14.55    2.46   1-0.45515-0.33844-0.82804-0.93630-0.32738-0.09378
   0  -2  -5   11.07    2.11   1-0.73068-0.61121-0.67416-0.78149-0.10768 0.12524
   0   2  -5   13.19    2.71   1-0.71174-0.50833-0.20866-0.13058 0.67072 0.85120
   0  -2   5   15.56    2.18   1-0.53292-0.73721-0.04380-0.11937 0.84502 0.66502
   0   2   5   12.80    2.66   1-0.72470-0.84292 0.23239 0.34110 0.64868 0.41608
   0  -2   6   32.36    2.84   1-0.05053-0.28359 0.99827 0.92443-0.02984-0.25494
   0  -2  -6   35.15    3.29   1-0.43172-0.28310-0.84700-0.95845-0.31015-0.03500
   0  -2  -6   23.77    2.21   1-0.75103-0.59927-0.65833-0.76858-0.05034 0.22392
   0   2  -6   38.21    2.82   1-0.73817-0.50248-0.25861-0.18345 0.62307 0.84490
   0  -2   6   28.70    2.26   1-0.54254-0.77906-0.03238-0.10462 0.83940 0.61815
   0   2   6   34.20    2.91   1-0.70936-0.85983 0.20444 0.31644 0.67453 0.40067
   0  -2   7   46.27    3.37   1 0.00111-0.26371 0.99996 0.92926 0.00812-0.25871
   0  -2  -7   47.82    3.44   1-0.41963-0.23910-0.85623-0.97087-0.30126 0.01544
   0  -2  -7   48.36    3.13   1-0.76019-0.57615-0.64934-0.76250-0.02129 0.29432
   0   2  -7   48.72    3.20   1-0.75849-0.49052-0.30227-0.23002 0.57734 0.84051
   0  -2   7   45.68    2.82   1-0.54069-0.80944-0.03460-0.10350 0.84050 0.57800
   0   2   7   39.05    3.11   1-0.69338-0.87611 0.17705 0.29234 0.69847 0.38335
   0  -2   8    3.00    1.95   1 0.04618-0.25039 0.99808 0.93051 0.04127-0.26730
   0  -2  -8    2.21    2.26   1-0.41517-0.20273-0.85955-0.97737-0.29798 0.06029
   0  -2  -8    1.91    2.26   1-0.76349-0.54716-0.64573-0.76182-0.01020 0.34675
   0   2  -8    1.81    2.49   1-0.77427-0.47403-0.34132-0.27199 0.53291 0.83744
   0  -2   8    1.85    1.61   1-0.53250-0.83347-0.04430-0.10987 0.84526 0.54151
   0   2   8    6.61    2.88   1-0.67682-0.89151 0.15017 0.26909 0.72066 0.36441
   0  -2   9    7.32    2.29   1 0.08662-0.24171 0.99370 0.92927 0.07101-0.27931
   0  -2  -9   10.78    2.63   1-0.41601-0.17166-0.85893-0.97994-0.29860 0.10123
   0  -2  -9    3.06    2.48   1-0.76321-0.51459-0.64605-0.76505-0.01116 0.38714
   0   2  -9    6.02    2.00   1-0.78648-0.45396-0.37686-0.31046 0.48930 0.83518
   0  -2   9    7.87    2.16   1-0.52020-0.85341-0.05864-0.12087 0.85202 0.50702
   0   2   9    2.75    1.86   1-0.65933-0.90625 0.12319 0.24543 0.74168 0.34418
   0  -2  10    1.61    3.30   1 0.12366-0.23643 0.98744 0.92615 0.09824-0.29382
   0  -2 -10   -0.07    2.84   1-0.42066-0.14441-0.85546-0.97965-0.30202 0.13936
   0  -2 -10    0.89    2.51   1-0.76038-0.47948-0.64913-0.77106-0.02066 0.41898
   0   2 -10    2.01    2.10   1-0.79571-0.43093-0.40963-0.34615 0.44612 0.83335
   0  -2  10    0.36    1.92   1-0.50492-0.87035-0.07611-0.13501 0.85980 0.47355
   0   2  10   -0.45    2.64   1-0.64099-0.92014 0.09617 0.22176 0.76149 0.32274
   0  -2  11    1.73    2.37   1 0.15868-0.23404 0.97951 0.92202 0.12400-0.30836
   0  -2 -11    7.13    3.10   1-0.42814-0.11998-0.84977-0.97715-0.30752 0.17542
   0  -2 -11    2.98    2.48   1-0.75549-0.44230-0.65414-0.77898-0.03652 0.44446
   0   2 -11    5.81    2.59   1-0.80237-0.40531-0.44014-0.37957 0.40307 0.83165
   0  -2  11   -2.21    2.14   1-0.48788-0.88522-0.09514-0.15000 0.86770 0.44031
   0   2  11   -2.43    3.22   1-0.62173-0.93311 0.06904 0.19796 0.78017 0.30016
   0  -2  12   -3.53    3.37   1 0.19116-0.23341 0.97035 0.91607 0.14788-0.32608
   0  -2 -12    3.31    2.59   1-0.43775-0.09768-0.84226-0.97282-0.31458 0.20992
   0  -2 -12    0.25    2.95   1-0.74870-0.40322-0.66042-0.78818-0.05739 0.46494
   0   2 -12    0.81    2.12   1-0.80669-0.37735-0.46874-0.41109 0.35989 0.82982
   0  -2  12   -0.47    2.33   1-0.46816-0.89770-0.11662-0.16808 0.87590 0.40728
   0   2  12   -4.08    3.56   1-0.60152-0.94513 0.04172 0.17397 0.79776 0.27650
   0  -2  13   -0.76    3.25   1 0.22209-0.23434 0.95997 0.90889 0.17062-0.34494
   0  -2 -13   -0.03    2.25   1-0.44899-0.07702-0.83316-0.96691-0.32286 0.24320
   0  -2 -13    0.06    2.83   1-0.74004-0.36228-0.66749-0.79817-0.08236 0.48131
   0   2 -13    0.86    2.53   1-0.80883-0.34721-0.49568-0.44095 0.31637 0.82764
   0  -2  13    0.33    2.38   1-0.44655-0.90827-0.13953-0.18761 0.88380 0.37395
   0   2  13    4.40    2.44   1-0.58029-0.95613 0.01416 0.14974 0.81428 0.25177
   0  -2  14   -1.29    3.00   1 0.25177-0.23651 0.94845 0.90057 0.19245-0.36472
   0  -2 -14    0.35    2.89   1-0.46153-0.05765-0.82262-0.95955-0.33207 0.27554
   0  -2  14    3.38    2.81   1-0.42310-0.91701-0.16369-0.20837 0.89117 0.34007
   0   2  14   -2.02    2.73   1-0.55798-0.96605-0.01370 0.12521 0.82973 0.22598
   0  -2  15    1.60    3.50   1 0.28044-0.23970 0.93581 0.89113 0.21353-0.38525
   0  -2 -15    4.88    4.18   1-0.47509-0.03929-0.81073-0.95085-0.34204 0.30713
   0   2 -15   -0.44    2.61   1-0.80680-0.28063-0.54525-0.49636 0.22752 0.82150
   0   2  15    0.80    3.36   1-0.53453-0.97482-0.04191 0.10034 0.84410 0.19910
   0  -2  16   -3.51    3.36   1 0.30826-0.24372 0.92207 0.88059 0.23399-0.40639
   0  -2 -16   -3.94    4.84   1-0.48947-0.02176-0.79754-0.94085-0.35262 0.33812
   0   2 -16    2.85    3.89   1-0.80262-0.24419-0.56808-0.52211 0.18184 0.81717
   0   2  16    2.31    4.61   1-0.50986-0.98238-0.07050 0.07507 0.85736 0.17110
   0  -2  17   -5.51    5.90   1 0.33538-0.24846 0.90720 0.86892 0.25394-0.42805
   0  -2 -17   -0.30    3.06   1-0.50451-0.00490-0.78307-0.92956-0.36368 0.36862
   0   2  17    3.44    3.99   1-0.48455-0.98855-0.09881 0.05094 0.86916 0.14200
   0  -4   0  703.89   11.44   1-0.76712-0.85224 0.31858 0.13336-0.55679-0.50584
   0  -4   1   84.79    3.72   1-0.68081-0.79785 0.54140 0.35941-0.49332-0.48399
   0  -4  -1   86.04    3.94   1-0.80747-0.86067 0.06355-0.12473-0.58646-0.49363
   0  -4  -1   89.38    3.83   1 0.16914 0.11765-0.37432-0.56290-0.91174-0.81810
   0   4   1   86.95    4.06   1-0.77955-0.72569 0.35592 0.54378 0.51538 0.42150
   0   4  -1   73.76    3.27   1-0.79785-0.67948 0.41848 0.59976 0.43394 0.42258
   0  -4   2  186.08    5.30   1-0.57361-0.72236 0.70651 0.52759-0.41449-0.44702
   0  -4  -2  190.61    4.91   1 0.02544 0.00616-0.47712-0.66866-0.87846-0.74353
   0   4  -2  201.47    5.83   1-0.48327-0.33464 0.10021 0.27973 0.86971 0.89986
   0   4   2  196.44    5.31   1-0.76962-0.74802 0.32919 0.52033 0.54708 0.41195
   0  -4   3   -1.21    1.78   1-0.46730-0.64764 0.81763 0.64174-0.33631-0.41075
   0  -4  -3    2.44    2.18   1-0.75531-0.74524-0.35927-0.55349-0.54810-0.37182
   0  -4  -3   -0.41    1.93   1-0.12606-0.11311-0.56812-0.76257-0.81323-0.63693
   0   4  -3   -3.33    2.56   1-0.54736-0.36646 0.02660 0.20319 0.83646 0.90797
   0   4  -3    0.34    1.28   1-0.17924 0.00400-0.38013-0.20613 0.90739 0.97851
   0   4   3   -0.54    2.36   1-0.75901-0.76966 0.30347 0.49790 0.57602 0.39963
   0   4  -3   -0.98    1.29   1-0.80231-0.61941 0.56938 0.74418 0.17913 0.25003
   0  -4   4    5.76    2.12   1-0.37103-0.58315 0.88984 0.71709-0.26553-0.38170
   0  -4  -4    3.76    1.96   1-0.70534-0.66336-0.49092-0.68832-0.51136-0.29351
   0  -4  -4    4.73    1.80   1-0.26727-0.22204-0.63630-0.83352-0.72365-0.50590
   0   4  -4    6.30    2.11   1-0.59913-0.38595-0.03857 0.13510 0.79971 0.91257
   0   4   4    7.50    2.35   1-0.74764-0.79054 0.27824 0.47595 0.60300 0.38535
   0   4  -4    3.01    1.44   1-0.52599-0.31080 0.70920 0.88077-0.46941-0.35726
   0  -4   5    0.16    2.54   1-0.28698-0.53087 0.93602 0.76642-0.20372-0.36163
   0  -4  -5   -0.01    2.09   1-0.65997-0.58609-0.57960-0.78019-0.47800-0.21859
   0  -4  -5    3.14    1.74   1-0.38152-0.30402-0.67815-0.87828-0.62812-0.36902
   0   4  -5    1.65    2.64   1-0.64139-0.39593-0.09675 0.07399 0.76108 0.91529
   0   4   5   -1.50    2.38   1-0.73547-0.81063 0.25320 0.45420 0.62846 0.36955
   0  -4   6  128.36    4.55   1-0.21389-0.48954 0.96527 0.79881-0.14997-0.34962
   0  -4  -6  134.28    4.81   1-0.62351-0.51772-0.63847-0.84225-0.45119-0.15022
   0  -4  -6  112.29    4.23   1-0.46579-0.35603-0.69977-0.90281-0.54161-0.24116
   0   4  -6  123.02    4.44   1-0.67621-0.39848-0.14922 0.01861 0.72143 0.91698
   0  -4   6  122.30    4.23   1-0.12032-0.40028-0.42440-0.58820 0.89744 0.70270
   0   4   6  128.65    4.50   1-0.72246-0.82988 0.22819 0.43248 0.65266 0.35249
   0  -4   7    0.06    2.12   1-0.14991-0.45723 0.98332 0.81995-0.10292-0.34439
   0  -4  -7    3.92    2.76   1-0.59615-0.45845-0.67733-0.88429-0.43107-0.08854
   0  -4  -7   -0.11    1.38   1-0.52411-0.38206-0.70899-0.91494-0.47182-0.13001
   0   4  -7   -1.07    2.17   1-0.70512-0.39511-0.19701-0.03209 0.68116 0.91806
   0  -4   7    0.30    1.48   1-0.22680-0.53899-0.34229-0.50269 0.91180 0.67586
   0   4   7   -1.14    2.68   1-0.70860-0.84828 0.20310 0.41068 0.67573 0.33430
   0  -4   8   13.37    2.63   1-0.09296-0.43204 0.99379 0.83355-0.06104-0.34426
   0  -4  -8   16.01    2.35   1-0.57670-0.40709-0.70265-0.91280-0.41676-0.03268
   0  -4  -8    9.94    1.94   1-0.56263-0.38830-0.71192-0.92078-0.42025-0.03709
   0   4  -8   14.21    2.87   1-0.72920-0.38692-0.24095-0.07895 0.64047 0.91872
   0  -4   8   13.75    1.84   1-0.28070-0.62471-0.29702-0.45418 0.91267 0.63517
   0   4   8    8.48    3.31   1-0.69387-0.86579 0.17786 0.38872 0.69778 0.31509
   0  -4   9    2.04    2.15   1-0.04164-0.41248 0.99886 0.84176-0.02331-0.34826
   0  -4  -9    0.07    2.98   1-0.56374-0.36223-0.71857-0.93190-0.40724 0.01839
   0  -4  -9    2.52    2.02   1-0.58694-0.38034-0.71222-0.92400-0.38500 0.03949
   0   4  -9    2.16    2.85   1-0.74924-0.37469-0.28168-0.12260 0.59940 0.91900
   0  -4   9    1.90    1.40   1-0.30508-0.68128-0.27567-0.42944 0.91155 0.59281
   0   4   9    0.36    3.01   1-0.67823-0.88241 0.15241 0.36656 0.71886 0.29491
   0  -4  10    0.23    2.35   1 0.00520-0.39739 0.99992 0.84596 0.01114-0.35556
   0  -4 -10    1.71    2.23   1-0.55601-0.32259-0.72773-0.94426-0.40155 0.06564
   0  -4 -10   -0.02    2.19   1-0.60106-0.36217-0.71177-0.92646-0.36345 0.10238
   0   4 -10   -0.29    2.96   1-0.76582-0.35899-0.31969-0.16353 0.55794 0.91890
   0  -4  10   -1.14    1.60   1-0.31371-0.72210-0.26798-0.41836 0.91091 0.55094
   0   4  10    4.76    3.40   1-0.66184-0.89785 0.12699 0.34481 0.73880 0.27379
   0  -4  11    3.10    3.14   1 0.04849-0.38586 0.99789 0.84707 0.04297-0.36547
   0  -4 -11    4.60    3.51   1-0.55246-0.28713-0.73187-0.95157-0.39894 0.10981
   0  -4 -11    1.45    2.34   1-0.60764-0.33647-0.71138-0.92900-0.35312 0.15405
   0   4 -11    4.06    2.75   1-0.77936-0.34025-0.35537-0.20213 0.51604 0.91834
   0   4  11   -0.40    2.37   1-0.64434-0.91258 0.10103 0.32218 0.75802 0.25176
   0  -4  12    0.05    2.72   1 0.08890-0.37721 0.99338 0.84569 0.07269-0.37750
   0  -4 -12   -0.64    3.84   1-0.55226-0.25502-0.73209-0.95498-0.39879 0.15151
   0  -4 -12   -1.28    2.33   1-0.60836-0.30492-0.71133-0.93187-0.35197 0.19655
   0   4 -12   -0.92    2.24   1-0.79014-0.31876-0.38902-0.23870 0.47362 0.91728
   0   4  12    1.16    2.79   1-0.62586-0.92632 0.07476 0.29925 0.77634 0.22883
   0  -4  13    4.22    2.43   1 0.12698-0.37090 0.98678 0.84223 0.10068-0.39124
   0  -4 -13    7.85    3.81   1-0.55477-0.22563-0.72918-0.95526-0.40064 0.19122
   0   4 -13    7.81    3.58   1-0.79839-0.29474-0.42087-0.27347 0.43060 0.91560
   0   4  13   12.96    3.17   1-0.60636-0.93905 0.04816 0.27598 0.79373 0.20497
   0  -4  14    6.11    4.21   1 0.16351-0.36712 0.97825 0.83769 0.12755-0.40433
   0  -4 -14    1.00    2.85   1-0.55949-0.19843-0.72364-0.95290-0.40411 0.22931
   0   4 -14    2.34    2.84   1-0.80426-0.26833-0.45109-0.30661 0.38687 0.91322
   0   4  14   -2.64    3.87   1-0.58579-0.95071 0.02119 0.25235 0.81018 0.18017
   0  -4  15   10.72    3.14   1 0.19801-0.36447 0.96819 0.83083 0.15292-0.42056
   0  -4 -15    7.81    3.10   1-0.56601-0.17304-0.71583-0.94828-0.40890 0.26608
   0   4 -15    6.76    3.40   1-0.80781-0.23961-0.47983-0.33826 0.34233 0.91003
   0   4  15   10.99    3.88   1-0.56410-0.96125-0.00615 0.22833 0.82567 0.15441
   0  -4  16   -3.55    4.17   1 0.23116-0.36318 0.95662 0.82245 0.17730-0.43779
   0  -4 -16    6.01    4.80   1-0.57401-0.14914-0.70600-0.94164-0.41479 0.30175
   0   4 -16   -2.03    4.11   1-0.80909-0.20862-0.50718-0.36853 0.29684 0.90590
   0   4  16    0.65    5.68   1-0.54125-0.97063-0.03393 0.20389 0.84017 0.12766
   0  -4  17   -5.65    3.78   1 0.26317-0.36303 0.94361 0.81264 0.20083-0.45586
   0  -4 -17    7.14    5.52   1-0.58325-0.12647-0.69432-0.93314-0.42158 0.33652
   0   4  17   -0.30    4.07   1-0.51715-0.97876-0.06216 0.17899 0.85363 0.09986
   0  -6   0   10.75    2.48   1-0.75065-0.87834 0.37393 0.09610-0.54468-0.46826
   0  -6   0   11.57    2.57   1 0.33859 0.21300-0.23072-0.50926-0.91220-0.83383
   0   6   0    8.29    2.21   1-0.77166-0.64249 0.33443 0.61128 0.54100 0.46208
   0  -6   1    1.24    2.19   1-0.68989-0.84950 0.52349 0.24888-0.50000-0.46519
   0  -6  -1    1.95    2.37   1-0.79126-0.88706 0.20927-0.07155-0.57454-0.45607
   0  -6  -1    0.63    2.48   1 0.26467 0.17131-0.29659-0.57802-0.91759-0.79783
   0   6  -1   -0.00    2.06   1-0.41304-0.25464 0.17385 0.44896 0.89396 0.85649
   0   6   1    2.77    1.78   1-0.76642-0.66951 0.32116 0.60130 0.55627 0.43609
   0   6  -1    2.11    1.86   1-0.77502-0.61360 0.34334 0.61691 0.53051 0.49285
   0  -6   2   -1.86    2.11   1-0.61634-0.80762 0.64906 0.37750-0.44591-0.45303
   0  -6  -2   -0.32    1.96   1-0.80828-0.87209 0.04510-0.23893-0.58706-0.42704
   0  -6  -2   -0.22    2.13   1 0.18381 0.12268-0.36289-0.64721-0.91351-0.75237
   0   6  -2    0.79    2.61   1-0.47044-0.27977 0.11416 0.38635 0.87501 0.87889
   0   6   2   -1.40    2.43   1-0.75977-0.69512 0.30524 0.58867 0.57407 0.41263
   0   6  -2    0.57    1.60   1-0.77523-0.58155 0.34389 0.61417 0.52986 0.53345
   0  -6   3   -1.04    1.92   1-0.53747-0.76059 0.74875 0.48038-0.38791-0.43671
   0  -6  -3    0.98    2.43   1-0.80466-0.83648-0.10483-0.39208-0.58439-0.38284
   0  -6  -3    0.24    1.97   1 0.09804 0.06913-0.42723-0.71443-0.89880-0.69628
   0   6  -3   -2.77    2.36   1-0.52106-0.29812 0.05764 0.32691 0.85156 0.89679
   0   6   3   -3.44    2.43   1-0.75193-0.71953 0.28753 0.57424 0.59322 0.39052
   0   6  -3    0.76    1.58   1-0.76734-0.54141 0.32344 0.59043 0.55369 0.59854
   0  -6   4   -1.36    2.06   1-0.45952-0.71415 0.82434 0.55894-0.33059-0.42138
   0  -6  -4    1.42    2.24   1-0.78730-0.78815-0.23106-0.52080-0.57163-0.32798
   0  -6  -4   -1.05    2.09   1 0.01151 0.01482-0.48624-0.77646-0.87374-0.62998
   0   6  -4    2.21    2.86   1-0.56557-0.31035 0.00433 0.27068 0.82468 0.91126
   0   6   4    1.38    2.32   1-0.74300-0.74286 0.26849 0.55849 0.61306 0.36910
   0  -6   5   13.74    2.84   1-0.38497-0.67137 0.88076 0.61850-0.27577-0.40830
   0  -6  -5    6.77    2.22   1-0.76307-0.73202-0.33317-0.62609-0.55381-0.26860
   0  -6  -5    6.05    2.12   1-0.07281-0.03726-0.53817-0.83131-0.83968-0.55455
   0   6  -5    8.03    2.98   1-0.60467-0.31717-0.04590 0.21752 0.79515 0.92308
   0   6   5    5.43    3.14   1-0.73304-0.76515 0.24842 0.54171 0.63318 0.34796
   0  -6   6    1.27    2.91   1-0.31546-0.63364 0.92195 0.66284-0.22466-0.39892
   0  -6  -6    4.14    2.42   1-0.73749-0.67453-0.41216-0.70827-0.53500-0.20823
   0  -6  -6    2.08    1.96   1-0.15002-0.08223-0.58085-0.87691-0.80005-0.47356
   0   6  -6    5.54    3.06   1-0.63899-0.31922-0.09330 0.16720 0.76353 0.93281
   0   6   6    3.08    2.41   1-0.72209-0.78645 0.22750 0.52407 0.65331 0.32683
   0  -6   7   25.21    3.33   1-0.25123-0.60118 0.95152 0.69554-0.17743-0.39343
   0  -6  -7   29.45    2.86   1-0.71377-0.61890-0.47186-0.77115-0.51756-0.14923
   0  -6  -7   24.32    2.42   1-0.21688-0.11685-0.61391-0.91289-0.75898-0.39111
   0   6  -7   25.14    3.20   1-0.66911-0.31706-0.13811 0.11947 0.73021 0.94084
   0   6   7   23.35    3.17   1-0.71016-0.80678 0.20586 0.50571 0.67326 0.30552
   0  -6   8    0.15    2.28   1-0.19197-0.57369 0.97222 0.71939-0.13385-0.39159
   0  -6  -8    3.22    2.97   1-0.69345-0.56668-0.51622-0.81870-0.50262-0.09273
   0  -6  -8   -0.93    1.89   1-0.27268-0.14030-0.63857-0.94022-0.71962-0.31030
   0   6  -8   -2.60    2.85   1-0.69548-0.31116-0.18056 0.07410 0.69547 0.94746
   0   6   8   -1.67    2.17   1-0.69726-0.82613 0.18356 0.48671 0.69290 0.28391
   0  -6   9    9.85    2.57   1-0.13728-0.55062 0.98609 0.73632-0.09363-0.39322
   0  -6  -9   15.32    3.15   1-0.67704-0.51836-0.54860-0.85426-0.49055-0.03911
   0  -6  -9    8.13    2.28   1-0.31548-0.15083-0.65555-0.96011-0.68608-0.23541
   0   6  -9    8.37    2.74   1-0.71851-0.30192-0.22089 0.03086 0.65950 0.95283
   0   6   9   12.68    2.54   1-0.68339-0.84452 0.16068 0.46711 0.71214 0.26188
   0  -6  10   -0.72    4.00   1-0.08632-0.53142 0.99468 0.74805-0.05616-0.39749
   0  -6 -10    5.70    4.06   1-0.66448-0.47389-0.57165-0.88050-0.48131 0.01168
   0  -6 -10   -0.35    1.75   1-0.34703-0.15011-0.66692-0.97440-0.65938-0.16736
   0   6 -10   -6.23    3.20   1-0.73850-0.28963-0.25928-0.01044 0.62239 0.95708
   0   6  10   -0.11    2.43   1-0.66873-0.86159 0.13753 0.44758 0.73067 0.23941
   0  -6  11    0.54    3.04   1-0.03867-0.51554 0.99902 0.75553-0.02112-0.40420
   0  -6 -11    7.15    3.67   1-0.65547-0.43297-0.58737-0.89941-0.47469 0.05986
   0   6 -11    4.37    3.88   1-0.75570-0.27456-0.29592-0.05000 0.58423 0.96026
   0   6  11    1.18    2.49   1-0.65290-0.87799 0.11358 0.42697 0.74887 0.21636
   0  -6  12    3.47    3.00   1 0.00612-0.50249 0.99991 0.75955 0.01181-0.41300
   0  -6 -12    2.84    3.16   1-0.64962-0.39521-0.59726-0.91248-0.47038 0.10572
   0   6 -12    3.51    3.65   1-0.77031-0.25690-0.33095-0.08795 0.54504 0.96242
   0   6  12   -3.08    2.78   1-0.63607-0.89339 0.08912 0.40585 0.76646 0.19270
   0  -6  13   -0.02    3.74   1 0.04850-0.49187 0.99789 0.76068 0.04298-0.42358
   0  -6 -13   -0.62    4.74   1-0.64652-0.36020-0.60239-0.92080-0.46811 0.14956
   0   6 -13    7.49    2.91   1-0.78248-0.23679-0.36450-0.12442 0.50483 0.96355
   0   6  13   -0.16    3.13   1-0.61819-0.90774 0.06417 0.38424 0.78339 0.16838
   0  -6  14   -2.71    3.23   1 0.08881-0.48333 0.99339 0.75931 0.07262-0.43568
   0  -6 -14   -2.77    3.59   1-0.64579-0.32757-0.60358-0.92518-0.46757 0.19166
   0   6 -14    3.14    2.83   1-0.79231-0.21434-0.39667-0.15951 0.46356 0.96364
   0   6  14   -2.64    3.67   1-0.59925-0.92103 0.03873 0.36212 0.79961 0.14335
   0  -6  15    1.11    3.21   1 0.12733-0.47657 0.98670 0.75576 0.10094-0.44910
   0  -6 -15    3.56    5.53   1-0.64711-0.29697-0.60142-0.92620-0.46854 0.23225
   0   6 -15    0.11    3.82   1-0.79986-0.18962-0.42754-0.19330 0.42120 0.96264
   0   6  15    6.78    4.04   1-0.57921-0.93322 0.01279 0.33952 0.81507 0.11756
   0  -6  16   -7.81    4.72   1 0.16460-0.47209 0.97797 0.75112 0.12835-0.46144
   0  -6 -16   -0.96    3.78   1-0.65017-0.26812-0.59634-0.92431-0.47079 0.27156
   0   6 -16    4.10    3.60   1-0.80518-0.16266-0.45718-0.22585 0.37770 0.96048
   0   6  16    3.21    3.55   1-0.55801-0.94425-0.01366 0.31640 0.82971 0.09095
   0  -8   0   14.53    2.38   1-0.73136-0.90161 0.42856 0.05812-0.53050-0.42861
   0  -8   0   16.06    2.75   1 0.38210 0.21470-0.18933-0.56053-0.90451-0.79981
   0   8   0   18.28    2.53   1-0.74881-0.57659 0.28076 0.64989 0.60036 0.49514
   0  -8   1   79.46    3.92   1-0.68223-0.88440 0.53865 0.17143-0.49437-0.43409
   0  -8  -1   70.10    4.00   1-0.76932-0.90765 0.31034-0.06332-0.55841-0.41491
   0  -8  -1   78.28    3.97   1 0.33278 0.19756-0.23608-0.61036-0.91297-0.76708
   0   8  -1   73.12    3.86   1-0.43806-0.23762 0.14836 0.51614 0.88661 0.82287
   0   8   1   79.00    3.72   1-0.74710-0.60714 0.27710 0.64952 0.60418 0.45770
   0   8  -1   79.28    3.72   1-0.74733-0.54285 0.27758 0.64342 0.60369 0.53972
   0  -8   2   42.22    3.05   1-0.62505-0.85886 0.63616 0.27195-0.45232-0.43403
   0  -8  -2   33.39    3.42   1-0.79456-0.90096 0.18913-0.18744-0.57697-0.39131
   0  -8  -2   39.64    2.95   1 0.28054 0.17755-0.28288-0.66005-0.91720-0.72993
   0   8  -2   30.26    2.79   1-0.48089-0.24818 0.10282 0.46768 0.87072 0.84833
   0   8  -2   39.34    2.79   1-0.74024-0.50351 0.26280 0.62537 0.61884 0.59614
   0   8   2   40.44    3.20   1-0.74324-0.63552 0.26898 0.64468 0.61257 0.42482
   0  -8   3    0.61    2.83   1-0.56291-0.82857 0.71956 0.35854-0.40663-0.43001
   0  -8  -3   -3.97    2.62   1-0.80697-0.88138 0.07262-0.30715-0.58609-0.35889
   0  -8  -3   -3.04    1.82   1 0.22666 0.15590-0.32846-0.70851-0.91691-0.68825
   0   8  -3    0.60    2.61   1-0.52067-0.25568 0.05810 0.42005 0.85177 0.87073
   0   8  -3    3.04    1.93   1-0.72069-0.45170 0.22489 0.58417 0.65576 0.67431
   0   8   3    2.14    3.14   1-0.73772-0.66226 0.25771 0.63670 0.62397 0.39497
   0  -8   4    9.54    3.25   1-0.49884-0.79634 0.78860 0.43077-0.35951-0.42457
   0  -8  -4   16.68    2.97   1-0.80862-0.85105-0.03440-0.41740-0.58731-0.31856
   0  -8  -4   16.92    2.25   1 0.17222 0.13367-0.37194-0.75487-0.91213-0.64209
   0   8  -4   13.15    2.51   1-0.55739-0.26013 0.01442 0.37344 0.83012 0.89043
   0   8   4   16.08    2.21   1-0.73083-0.68763 0.24410 0.62638 0.63740 0.36714
   0  -8   5    2.24    2.31   1-0.43546-0.76439 0.84407 0.48915-0.31290-0.42004
   0  -8  -5   -1.24    2.30   1-0.80241-0.81284-0.12861-0.51482-0.58274-0.27245
   0  -8  -5    2.19    2.10   1 0.11855 0.11223-0.41239-0.79820-0.90326-0.59183
   0   8  -5   -1.67    2.89   1-0.59114-0.26160-0.02811 0.32799 0.80607 0.90773
   0   8   5    3.42    2.85   1-0.72272-0.71178 0.22868 0.61425 0.65220 0.34067
   0  -8   6    0.29    2.59   1-0.37342-0.73412 0.88831 0.53654-0.26728-0.41616
   0  -8  -6   12.05    3.42   1-0.79149-0.77136-0.20792-0.59636-0.57471-0.22214
   0  -8  -6    5.98    2.31   1 0.06718 0.09308-0.44894-0.83764-0.89102-0.53822
   0   8  -6   -1.09    3.19   1-0.62202-0.26021-0.06944 0.28374 0.77990 0.92291
   0   8   6   12.17    3.15   1-0.71349-0.73480 0.21179 0.60064 0.66788 0.31510
   0  -8   7    3.40    2.31   1-0.31384-0.70630 0.92280 0.57416-0.22347-0.41408
   0  -8  -7    4.34    3.49   1-0.77819-0.72615-0.27435-0.66598-0.56493-0.17079
   0  -8  -7    2.17    1.80   1 0.02061 0.07876-0.48030-0.87212-0.87686-0.48289
   0   8  -7    3.47    2.58   1-0.65017-0.25609-0.10955 0.24071 0.75184 0.93620
   0   8   7    0.66    2.73   1-0.70319-0.75675 0.19367 0.58581 0.68411 0.29006
   0  -8   8   26.17    3.75   1-0.25704-0.68127 0.94916 0.60367-0.18170-0.41405
   0  -8  -8   21.72    3.41   1-0.76449-0.68054-0.32813-0.72294-0.55486-0.11917
   0  -8  -8   15.92    2.42   1-0.02158 0.06880-0.50727-0.90201-0.86151-0.42618
   0   8  -8   19.11    3.00   1-0.67572-0.24936-0.14844 0.19890 0.72205 0.94776
   0   8   8   18.74    3.11   1-0.69185-0.77767 0.17450 0.56993 0.70063 0.26532
   0  -8   9    4.28    3.38   1-0.20308-0.65909 0.96880 0.62645-0.14202-0.41611
   0  -8  -9    2.17    3.27   1-0.75166-0.63580-0.37083-0.76883-0.54542-0.06817
   0  -8  -9    7.44    2.20   1-0.05746 0.06516-0.52912-0.92678-0.84659-0.36989
   0   8  -9    9.32    3.36   1-0.69879-0.24015-0.18614 0.15829 0.69068 0.95774
   0   8   9    7.38    3.46   1-0.67949-0.79756 0.15442 0.55313 0.71724 0.24068
   0  -8  10    3.47    2.80   1-0.15199-0.63960 0.98284 0.64354-0.10445-0.42041
   0  -8 -10    0.90    2.95   1-0.74040-0.59264-0.40407-0.80525-0.53714-0.01833
   0   8 -10    2.75    3.00   1-0.71948-0.22857-0.22268 0.11883 0.65783 0.96624
   0   8  10    0.40    2.78   1-0.66631-0.81603 0.13380 0.53610 0.73356 0.21605
   0  -8  11    6.44    3.58   1-0.10331-0.62267 0.99227 0.65611-0.06865-0.42636
   0  -8 -11   -1.16    2.51   1-0.73107-0.55140-0.42932-0.83369-0.53028 0.03008
   0   8 -11    0.87    4.41   1-0.73791-0.21473-0.25809 0.08049 0.62359 0.97335
   0   8  11    2.93    2.86   1-0.65193-0.83388 0.11214 0.51777 0.74993 0.19117
   0  -8  12    5.59    4.65   1-0.05693-0.60806 0.99778 0.66475-0.03455-0.43400
   0  -8 -12   -0.90    3.79   1-0.72379-0.51221-0.44784-0.85539-0.52493 0.07699
   0   8 -12   -1.58    4.09   1-0.75414-0.19869-0.29243 0.04324 0.58799 0.97910
   0   8  12   -3.36    3.54   1-0.63652-0.85070 0.08978 0.49874 0.76601 0.16599
   0  -8  13    5.13    3.04   1-0.01263-0.59552 0.99991 0.67003-0.00198-0.44317
   0  -8 -13   13.87    3.73   1-0.71852-0.47504-0.46066-0.87140-0.52105 0.12242
   0   8 -13   13.04    3.42   1-0.76825-0.18051-0.32571 0.00704 0.55108 0.98354
   0   8  13   10.96    4.43   1-0.62007-0.86647 0.06675 0.47905 0.78169 0.14043
   0  -8  14    0.67    3.30   1 0.02979-0.58484 0.99912 0.67238 0.02922-0.45371
   0  -8 -14   -1.26    5.29   1-0.71516-0.43976-0.46862-0.88255-0.51858 0.16645
   0   8 -14   -1.52    4.66   1-0.78026-0.16025-0.35798-0.02814 0.51286 0.98667
   0   8  14    0.33    5.22   1-0.60255-0.88118 0.04308 0.45872 0.79691 0.11440
   0  -8  15    3.28    2.90   1 0.07058-0.57582 0.99574 0.67213 0.05921-0.46546
   0  -8 -15   -1.31    4.52   1-0.71355-0.40624-0.47238-0.88949-0.51739 0.20920
   0   8 -15   11.45    3.79   1-0.79021-0.13793-0.38926-0.06234 0.47331 0.98847
   0   8  15   -3.50    4.92   1-0.58392-0.89478 0.01880 0.43776 0.81159 0.08782
   0 -10   0    2.06    2.73   1-0.70915-0.92196 0.48243 0.01938-0.51416-0.38679
   0  10   0    2.53    2.39   1-0.43540-0.22520 0.15111 0.61448 0.88746 0.75610
   0  10   0    1.37    2.46   1-0.71994-0.50466 0.22351 0.68493 0.65705 0.52552
   0 -10   1   35.71    2.96   1-0.66673-0.91123 0.56762 0.10758-0.48297-0.39760
   0 -10  -1   36.25    3.54   1-0.74464-0.92553 0.39194-0.07433-0.54026-0.37129
   0  10  -1   29.23    2.82   1-0.46930-0.22682 0.11540 0.57586 0.87546 0.78545
   0  10  -1   36.85    3.20   1-0.71380-0.46627 0.21234 0.67047 0.66737 0.57710
   0  10   1   38.65    3.44   1-0.72176-0.53874 0.22688 0.69158 0.65390 0.48110
   0 -10   2    1.56    3.04   1-0.61875-0.89509 0.64553 0.18868-0.44768-0.40399
   0 -10  -2    1.06    2.39   1-0.77219-0.92116 0.29922-0.17028-0.56052-0.34993
   0 -10  -2    1.71    2.20   1 0.35387 0.20902-0.21641-0.68642-0.90991-0.69651
   0  10  -2   -0.36    3.17   1-0.50212-0.22737 0.07926 0.53680 0.86115 0.81249
   0  10  -2    0.45    1.95   1-0.70040-0.42062 0.18888 0.64373 0.68829 0.63928
   0  10   2    0.37    3.11   1-0.72068-0.56991 0.22487 0.69287 0.65578 0.44172
   0 -10   3   44.43    3.67   1-0.56688-0.87506 0.71478 0.26111-0.40954-0.40752
   0 -10  -3   44.06    4.05   1-0.79170-0.90871 0.20671-0.26560-0.57486-0.32202
   0 -10  -3   47.49    3.08   1 0.31762 0.20499-0.24995-0.72284-0.91468-0.65990
   0  10  -3   48.72    4.43   1-0.53365-0.22662 0.04294 0.49756 0.84460 0.83729
   0  10   3   50.10    3.63   1-0.71746-0.59895 0.21896 0.69024 0.66128 0.40597
   0 -10   4    0.35    3.34   1-0.51272-0.85275 0.77486 0.32439-0.36971-0.40936
   0 -10  -4    0.34    2.96   1-0.80338-0.88840 0.11892-0.35661-0.58345-0.28907
   0 -10  -4    0.03    2.55   1 0.28192 0.20151-0.28169-0.75747-0.91715-0.62098
   0  10  -4   -3.08    3.29   1-0.56371-0.22441 0.00663 0.45833 0.82593 0.85997
   0  10   4    2.66    2.13   1-0.71253-0.62628 0.21007 0.68464 0.66944 0.37287
   0 -10   5   19.17    3.15   1-0.45799-0.82943 0.82564 0.37806-0.32947-0.41122
   0 -10  -5   19.12    3.34   1-0.80853-0.86156 0.03766-0.44108-0.58724-0.25131
   0 -10  -5   25.88    3.19   1 0.24746 0.19928-0.31119-0.78985-0.91756-0.58001
   0  10  -5   17.43    3.96   1-0.59220-0.22062-0.02949 0.41929 0.80524 0.88063
   0  10   5   20.56    2.76   1-0.70617-0.65216 0.19883 0.67668 0.67955 0.34172
   0 -10   6   10.85    2.86   1-0.40308-0.80629 0.86830 0.42386-0.28909-0.41258
   0 -10  -6   11.30    3.23   1-0.80860-0.82963-0.03541-0.51737-0.58729-0.20981
   0 -10  -6   11.43    2.70   1 0.21499 0.19904-0.33800-0.81954-0.91625-0.53732
   0  10  -6    9.75    3.35   1-0.61903-0.21518-0.06532 0.38053 0.78264 0.89938
   0  10   6   14.29    3.37   1-0.69851-0.67676 0.18567 0.66681 0.69108 0.31199
   0 -10   7   26.71    3.59   1-0.34901-0.78399 0.90333 0.46204-0.24933-0.41456
   0 -10  -7   21.48    3.03   1-0.80510-0.79415-0.09951-0.58468-0.58472-0.16570
   0 -10  -7   18.31    2.83   1 0.18533 0.20161-0.36170-0.84613-0.91368-0.49337
   0  10  -7   26.44    4.20   1-0.64415-0.20803-0.10075 0.34218 0.75822 0.91631
   0  10   7   22.40    3.08   1-0.68968-0.70018 0.17091 0.65534 0.70365 0.28330
   0 -10   8    4.11    3.43   1-0.29625-0.76301 0.93161 0.49346-0.21054-0.41750
   0 -10  -8    3.78    3.14   1-0.79953-0.75842-0.15364-0.64078-0.58063-0.11913
   0 -10  -8    5.96    2.25   1 0.15932 0.20781-0.38187-0.86919-0.91037-0.44867
   0  10  -8   10.28    3.10   1-0.66755-0.19915-0.13571 0.30430 0.73208 0.93152
   0  10   8    5.00    4.25   1-0.67972-0.72248 0.15479 0.64250 0.71694 0.25533
   0 -10   9   19.92    3.15   1-0.24507-0.74359 0.95396 0.51895-0.17290-0.42160
   0 -10  -9   23.42    3.18   1-0.79281-0.71979-0.20005-0.69037-0.57568-0.07263
   0  10  -9   28.94    3.66   1-0.68921-0.18853-0.17014 0.26696 0.70429 0.94508
   0  10   9   20.41    3.06   1-0.66889-0.74324 0.13778 0.62898 0.73047 0.22795
   0 -10  10    1.42    3.19   1-0.19558-0.72587 0.97113 0.53927-0.13651-0.42694
   0 -10 -10    0.31    3.90   1-0.78588-0.68095-0.23835-0.73186-0.57058-0.02597
   0  10 -10    0.71    4.75   1-0.70911-0.17616-0.20400 0.23018 0.67493 0.95706
   0  10  10    3.81    4.29   1-0.65681-0.76339 0.11940 0.61394 0.74453 0.20077
   0 -10  11    0.92    3.44   1-0.14794-0.70981 0.98377 0.55494-0.10148-0.43381
   0 -10 -11    5.02    3.39   1-0.77933-0.64249-0.26932-0.76601-0.56577 0.02039
   0  10 -11    6.21    5.43   1-0.72727-0.16204-0.23725 0.19401 0.64403 0.96752
   0  10  11    6.86    2.77   1-0.64368-0.78249 0.10007 0.59794 0.75871 0.17370
   0 -10  12    2.20    3.77   1-0.10183-0.69546 0.99250 0.56681-0.06757-0.44165
   0 -10 -12    6.25    3.60   1-0.77356-0.60481-0.29372-0.79360-0.56153 0.06619
   0  10 -12    8.02    4.16   1-0.74367-0.14617-0.26988 0.15846 0.61164 0.97648
   0  10  12   -2.87    4.47   1-0.62951-0.80054 0.07985 0.58106 0.77287 0.14661
   0 -10  13    2.56    3.79   1-0.05730-0.68269 0.99774 0.57519-0.03482-0.45064
   0 -10 -13   11.05    3.80   1-0.76880-0.56815-0.31229-0.81536-0.55803 0.11125
   0  10 -13    3.69    4.11   1-0.75831-0.12853-0.30186 0.12357 0.57778 0.98397
   0  10  13   11.82    3.59   1-0.61427-0.81753 0.05882 0.56336 0.78689 0.11938
   0 -10  14   -0.20    3.26   1-0.01424-0.67139 0.99989 0.58047-0.00316-0.46073
   0 -10 -14   -4.74    5.19   1-0.76517-0.53261-0.32570-0.83195-0.55536 0.15548
   0  10 -14    6.77    4.13   1-0.77118-0.10913-0.33317 0.08933 0.54246 0.99000
   0  10  14   -2.13    3.37   1-0.59796-0.83345 0.03702 0.54489 0.80067 0.09190
   0 -12   0    3.49    2.77   1-0.68384-0.93922 0.53551-0.02014-0.49555-0.34272
   0  12   0    7.55    3.87   1-0.47768-0.22543 0.10633 0.66238 0.87207 0.71444
   0  12   0    6.89    3.26   1-0.68441-0.42608 0.16232 0.71602 0.71079 0.55295
   0 -12   1   26.89    3.95   1-0.64577-0.93279 0.60362 0.05093-0.46756-0.35677
   0 -12  -1   14.05    3.43   1-0.71723-0.94068 0.46375-0.09513-0.52010-0.32566
   0  12  -1   18.87    3.30   1-0.50336-0.21885 0.07786 0.63100 0.86055 0.74427
   0  12   1   20.39    3.65   1-0.45214-0.23217 0.13367 0.69264 0.88187 0.68289
   0  12  -1   17.50    2.99   1-0.67372-0.38263 0.14529 0.69539 0.72456 0.60829
   0  12   1   25.08    3.25   1-0.69001-0.46394 0.17146 0.72845 0.70319 0.50409
   0 -12   2    2.17    3.08   1-0.60369-0.92256 0.66702 0.11751-0.43661-0.36750
   0 -12  -2    6.86    3.41   1-0.74526-0.93680 0.39012-0.17198-0.54072-0.30466
   0  12  -2    1.15    3.11   1-0.52891-0.21212 0.04851 0.59872 0.84728 0.77235
   0  12   2    0.68    2.70   1-0.42708-0.23938 0.15964 0.72153 0.89000 0.64967
   0  12  -2    0.49    2.20   1-0.65398-0.33066 0.11518 0.66194 0.74768 0.67267
   0  12   2   -0.67    3.00   1-0.69194-0.49812 0.17466 0.73494 0.70049 0.46013
   0 -12   3   10.71    2.91   1-0.55856-0.90928 0.72473 0.17842-0.40343-0.37599
   0 -12  -3    4.73    2.69   1-0.76769-0.92731 0.31646-0.24887-0.55721-0.27955
   0 -12  -3    6.05    3.24   1 0.38990 0.23551-0.18169-0.74709-0.90275-0.62159
   0  12  -3    8.26    4.16   1-0.55408-0.20501 0.01847 0.56576 0.83225 0.79867
   0  12   3    3.68    2.80   1-0.69119-0.52963 0.17342 0.73698 0.70154 0.41992
   0 -12   4    3.85    3.69   1-0.51131-0.89386 0.77629 0.23317-0.36868-0.38292
   0 -12  -4   -0.04    3.05   1-0.78479-0.91240 0.24381-0.32425-0.56978-0.24975
   0 -12  -4   -1.17    2.87   1 0.36580 0.24365-0.20507-0.77334-0.90781-0.58529
   0  12  -4    2.19    2.67   1-0.57866-0.19731-0.01208 0.53229 0.81547 0.82324
   0  12   4   -0.42    3.35   1-0.68835-0.55904 0.16873 0.73558 0.70547 0.38259
   0 -12   5    4.42    3.66   1-0.46310-0.87706 0.82127 0.28103-0.33322-0.38959
   0 -12  -5    3.16    3.29   1-0.79663-0.89225 0.17527-0.39601-0.57849-0.21691
   0 -12  -5    2.94    2.54   1 0.34406 0.25402-0.22562-0.79713-0.91143-0.54776
   0  12  -5    0.29    4.21   1-0.60248-0.18886-0.04299 0.49846 0.79697 0.84609
   0  12   5    2.77    3.25   1-0.68378-0.58672 0.16129 0.73143 0.71163 0.34749
   0 -12   6   -1.10    3.24   1-0.41406-0.85979 0.86036 0.32327-0.29717-0.39527
   0 -12  -6   -2.36    2.41   1-0.80408-0.86771 0.11150-0.46299-0.58396-0.18085
   0 -12  -6   -0.03    3.23   1 0.32391 0.26609-0.24423-0.81862-0.91402-0.50896
   0  12  -6   -0.97    2.85   1-0.62540-0.17951-0.07412 0.46441 0.77677 0.86723
   0  12   6    0.49    3.13   1-0.67772-0.61291 0.15159 0.72502 0.71952 0.31412
   0 -12   7   -3.22    2.78   1-0.36503-0.84253 0.89362 0.35967-0.26111-0.40095
   0 -12  -7   -5.05    3.38   1-0.80795-0.83959 0.05343-0.52427-0.58681-0.14215
   0 -12  -7   -0.20    2.36   1 0.30658 0.28099-0.25989-0.83717-0.91567-0.46923
   0  12  -7   -4.80    4.45   1-0.64732-0.16915-0.10536 0.43025 0.75489 0.88671
   0  12   7   -2.04    4.21   1-0.67053-0.63728 0.14032 0.71709 0.72848 0.28221
   0 -12   8    4.76    3.61   1-0.31643-0.82570 0.92145 0.39064-0.22537-0.40695
   0 -12  -8    5.46    4.31   1-0.80910-0.80875 0.00160-0.57932-0.58766-0.10146
   0  12  -8    5.71    4.16   1-0.66812-0.15768-0.13659 0.39610 0.73139 0.90456
   0  12   8    6.39    3.90   1-0.66191-0.66088 0.12708 0.70719 0.73872 0.25121
   0 -12   9    0.92    4.82   1-0.26855-0.80959 0.94430 0.41664-0.19017-0.41348
   0 -12  -9   -1.35    2.66   1-0.80833-0.77599-0.04379-0.62793-0.58709-0.05935
   0  12  -9    1.75    3.82   1-0.68775-0.14503-0.16775 0.36203 0.70629 0.92081
   0  12   9    0.30    3.62   1-0.65212-0.68333 0.11243 0.69587 0.74972 0.22095
   0 -12  10    8.47    3.65   1-0.22159-0.79440 0.96263 0.43811-0.15563-0.42068
   0 -12 -10    3.37    3.68   1-0.80633-0.74201-0.08283-0.67018-0.58562-0.01634
   0  12 -10    8.29    4.49   1-0.70612-0.13112-0.19874 0.32811 0.67962 0.93549
   0  12  10    8.82    3.59   1-0.64122-0.70465 0.09651 0.68328 0.76125 0.19123
   0 -12  11    3.36    3.92   1-0.17580-0.78017 0.97683 0.45534-0.12196-0.42893
   0 -12 -11    6.53    3.60   1-0.80369-0.70737-0.11575-0.70631-0.58368 0.02714
   0  12 -11    5.33    3.68   1-0.72317-0.11591-0.22952 0.29441 0.65140 0.94862
   0  12  11    0.05    4.41   1-0.62923-0.72489 0.07946 0.66957 0.77314 0.16187
   0 -12  12    5.21    5.27   1-0.13096-0.76709 0.98738 0.46902-0.08899-0.43769
   0 -12 -12    2.25    4.64   1-0.80093-0.67501-0.14208-0.73429-0.58165 0.07188
   0  12 -12   -1.05    4.98   1-0.73887-0.09933-0.26003 0.26099 0.62165 0.96021
   0  12  12    1.72    3.69   1-0.61615-0.74403 0.06138 0.65482 0.78523 0.13271
   0 -14   0    3.21    4.57   1-0.65531-0.95302 0.58765-0.06087-0.47457-0.29671
   0  14   0    1.57    3.88   1-0.51904-0.22475 0.05998 0.70871 0.85263 0.66873
   0  14   0    0.96    2.83   1-0.64159-0.33958 0.09704 0.74270 0.76088 0.57711
   0 -14   1    5.29    4.62   1-0.62031-0.94986 0.64323-0.00209-0.44883-0.31264
   0 -14  -1    3.92    4.68   1-0.68684-0.95286 0.52960-0.12189-0.49776-0.27784
   0  14  -1    4.10    3.40   1-0.53869-0.21213 0.03698 0.68279 0.84169 0.69913
   0  14   1    7.67    4.16   1-0.50002-0.23800 0.08163 0.73328 0.86215 0.63690
   0  14   1    2.43    2.35   1-0.65143-0.38166 0.11140 0.76041 0.75047 0.52546
   0 -14   2   -3.23    3.65   1-0.58233-0.94372 0.69550 0.05335-0.42090-0.32638
   0 -14  -2    2.04    4.58   1-0.71458-0.94868 0.46996-0.18475-0.51816-0.25663
   0  14  -2   -3.06    2.90   1-0.55869-0.19985 0.01283 0.65572 0.82927 0.72806
   0  14   2    2.31    3.40   1-0.48190-0.25217 0.10171 0.75628 0.87029 0.60369
   0  14   2    5.24    3.31   1-0.65675-0.41921 0.11932 0.77165 0.74460 0.47833
   0 -14   3    4.48    3.77   1-0.54191-0.93515 0.74384 0.10488-0.39118-0.33834
   0 -14  -3   21.12    4.89   1-0.73828-0.94046 0.40997-0.24797-0.53558-0.23244
   0  14  -3   17.60    3.86   1-0.57882-0.18771-0.01229 0.62767 0.81535 0.75550
   0  14   3   19.87    3.81   1-0.46504-0.26757 0.11998 0.77746 0.87712 0.56916
   0  14   3   14.86    3.13   1-0.65877-0.45346 0.12235 0.77802 0.74232 0.43480
   0 -14   4   -4.15    4.40   1-0.49964-0.92472 0.78783 0.15206-0.36009-0.34892
   0 -14  -4    3.00    3.58   1-0.75791-0.92817 0.35076-0.31040-0.55002-0.20527
   0  14  -4    4.29    3.08   1-0.59887-0.17549-0.03823 0.59881 0.79992 0.78141
   0  14   4    2.68    3.23   1-0.44978-0.28460 0.13614 0.79655 0.88269 0.53339
   0  14   4    3.52    3.09   1-0.65824-0.48515 0.12154 0.78055 0.74292 0.39416
   0 -14   5    8.00    4.20   1-0.45635-0.91282 0.82703 0.19413-0.32826-0.35924
   0 -14  -5    7.01    4.35   1-0.77363-0.91197 0.29345-0.37094-0.56158-0.17522
   0  14  -5   -0.91    4.08   1-0.61867-0.16301-0.06483 0.56929 0.78296 0.80580
   0  14   5    3.61    2.94   1-0.43657-0.30366 0.14990 0.81322 0.88709 0.49643
   0  14   5    5.37    3.86   1-0.65564-0.51478 0.11764 0.77998 0.74585 0.35583
   0 -14   6    4.75    3.92   1-0.41198-0.90023 0.86189 0.23214-0.29564-0.36835
   0 -14  -6    2.29    3.41   1-0.78592-0.89215 0.23815-0.42888-0.57061-0.14185
   0  14  -6    5.33    5.05   1-0.63806-0.15013-0.09197 0.53923 0.76446 0.82866
   0  14   6    1.75    2.98   1-0.65129-0.54266 0.11119 0.77686 0.75063 0.31936
   0 -14   7    9.27    4.01   1-0.36721-0.88722 0.89226 0.26565-0.26271-0.37716
   0 -14  -7    3.02    3.93   1-0.79485-0.86908 0.18728-0.48297-0.57718-0.10687
   0  14  -7    0.59    3.54   1-0.65689-0.13669-0.11953 0.50876 0.74444 0.84998
   0  14   7    1.34    4.08   1-0.64541-0.56901 0.10257 0.77158 0.75691 0.28439
   0 -14   8    0.01    3.63   1-0.32235-0.87414 0.91831 0.29485-0.22973-0.38591
   0 -14  -8    3.11    4.17   1-0.80109-0.84334 0.14066-0.53280-0.58177-0.06992
   0  14  -8   13.58    3.35   1-0.67506-0.12258-0.14740 0.47797 0.72288 0.86977
   0  14   8    8.61    5.07   1-0.63815-0.59398 0.09210 0.76444 0.76437 0.25060
   0 -14   9   12.39    5.10   1-0.27769-0.86125 0.94027 0.31995-0.19688-0.39481
   0 -14  -9    3.53    4.24   1-0.80517-0.81543 0.09867-0.57800-0.58477-0.03138
   0  14  -9   17.86    4.78   1-0.69244-0.10768-0.17548 0.44696 0.69980 0.88804
   0  14   9    8.94    4.68   1-0.62961-0.61767 0.08000 0.75568 0.77277 0.21775
   0 -14  10    8.86    4.10   1-0.23341-0.84874 0.95839 0.34120-0.16433-0.40399
   0 -14 -10    4.07    4.27   1-0.80757-0.78584 0.06152-0.61836-0.58654 0.00838
   0  14 -10   -1.39    4.71   1-0.70895-0.09192-0.20371 0.41582 0.67519 0.90478
   0  14  10    9.01    5.98   1-0.61986-0.64015 0.06647 0.74548 0.78188 0.18561
   0 -16   0   23.66    4.87   1-0.62319-0.96343 0.63895-0.10221-0.45095-0.24767
   0  16   0   17.85    4.48   1-0.55941-0.22308 0.01194 0.75335 0.82880 0.61862
   0 -16   1    7.90    4.35   1-0.59059-0.96267 0.68475-0.05322-0.42697-0.26537
   0 -16  -1    0.37    4.12   1-0.65315-0.96155 0.59132-0.15303-0.47298-0.22803
   0  16  -1    4.23    5.69   1-0.57440-0.20579-0.00669 0.73178 0.81854 0.64971
   0  16   1   -2.70    3.61   1-0.54530-0.24125 0.02908 0.77340 0.83773 0.58620
   0 -16   2    9.68    3.68   1-0.55565-0.95958 0.72816-0.00663-0.40128-0.28135
   0 -16  -2    0.71    4.90   1-0.68023-0.95689 0.54251-0.20481-0.49290-0.20590
   0  16  -2   -2.69    4.01   1-0.59002-0.18914-0.02666 0.70890 0.80694 0.67946
   0  16   2    5.25    4.30   1-0.53232-0.26055 0.04450 0.79175 0.84536 0.55248
   0 -16   3   -0.20    3.63   1-0.51872-0.95450 0.76872 0.03712-0.37413-0.29588
   0 -16  -3   -5.00    3.34   1-0.70429-0.94903 0.49322-0.25733-0.51059-0.18198
   0  16  -3   -0.19    4.80   1-0.60606-0.17291-0.04777 0.68487 0.79397 0.70784
   0  16   3    9.26    5.03   1-0.52078-0.28128 0.05797 0.80813 0.85171 0.51748
   0  16   3    4.45    4.60   1-0.61895-0.37049 0.06522 0.81313 0.78271 0.44893
   0 -16   4   -3.90    4.33   1-0.48043-0.94765 0.80590 0.07721-0.34597-0.30982
   0 -16  -4   -0.39    3.76   1-0.72523-0.93805 0.44427-0.30950-0.52598-0.15576
   0  16  -4    5.08    4.85   1-0.62234-0.15692-0.06988 0.65984 0.77961 0.73483
   0  16   4    1.75    4.38   1-0.62111-0.40487 0.06817 0.81942 0.78075 0.40573
   0 -16   5   -7.10    4.32   1-0.44069-0.93969 0.83991 0.11435-0.31675-0.32234
   0 -16  -5    3.28    3.84   1-0.74309-0.92399 0.39642-0.36058-0.53912-0.12729
   0  16  -5   -3.04    5.09   1-0.63868-0.14098-0.09286 0.63394 0.76384 0.76041
   0  16   5   -6.63    4.75   1-0.62076-0.43676 0.06771 0.82229 0.78106 0.36479
   0 -16   6    3.06    3.69   1-0.40004-0.93080 0.87044 0.14803-0.28686-0.33418
   0 -16  -6    0.57    4.09   1-0.75803-0.90701 0.35038-0.40985-0.55010-0.09666
   0  16  -6   -1.65    5.61   1-0.65491-0.12494-0.11657 0.60731 0.74665 0.78457
   0  16   6   -2.40    3.44   1-0.61835-0.46658 0.06439 0.82231 0.78325 0.32573
   0 -16   7    3.06    5.78   1-0.35877-0.92131 0.89748 0.17821-0.25651-0.34557
   0 -16  -7   -4.01    5.66   1-0.77025-0.88732 0.30677-0.45668-0.55909-0.06404
   0  16  -7   -3.20    5.38   1-0.67091-0.10866-0.14091 0.58005 0.72802 0.80729
   0  16   7   -2.18    4.26   1-0.61416-0.49462 0.05867 0.81992 0.78699 0.28822
  -1  -1  17    0.82    4.57   1 0.36368-0.17427 0.89008 0.88189 0.27474-0.43804
   1  -1 -17    0.23    4.21   1-0.45581 0.04061-0.82748-0.91134-0.32787 0.40964
  -1  -1  16    2.68    4.75   1 0.33827-0.16782 0.90553 0.89415 0.25606-0.41512
   1  -1 -16    5.12    4.45   1-0.43677 0.02775-0.84303-0.92370-0.31387 0.38209
  -1   1  16    4.92    3.61   1-0.51677-0.98652-0.06260 0.02025 0.85383 0.16236
  -1  -1  15    0.87    4.19   1 0.31233-0.16191 0.91993 0.90534 0.23698-0.39259
   1  -1 -15    4.87    4.29   1-0.41794 0.01467-0.85750-0.93498-0.30002 0.35438
   1   1 -15    5.73    2.78   1-0.79573-0.31499-0.59113-0.57229 0.13179 0.75713
  -1  -1  15    3.09    2.70   1-0.48239-0.96257-0.10118-0.11302 0.87009 0.24632
  -1   1  15    0.17    4.29   1-0.54333-0.98085-0.03145 0.04807 0.83892 0.18871
  -1   1  14    2.99    2.79   1 0.38982-0.01021 0.87270 0.94759 0.29397-0.31929
  -1  -1  14   22.19    4.74   1 0.28575-0.15663 0.93330 0.91551 0.21744-0.37053
   1  -1 -14    8.37    2.93   1-0.76313-0.35664-0.64613-0.71709-0.01141 0.59881
   1   1 -14   12.42    3.69   1-0.80146-0.35312-0.57274-0.55095 0.17208 0.75613
  -1  -1  14   10.34    3.90   1-0.50898-0.95742-0.07150-0.08755 0.85779 0.27508
  -1   1  14    3.11    3.62   1-0.56869-0.97398-0.00046 0.07573 0.82255 0.21358
  -1   1  13    4.48    2.65   1 0.37158 0.00339 0.88498 0.95668 0.28056-0.29110
  -1  -1  13    5.57    3.80   1 0.25841-0.15213 0.94566 0.92467 0.19733-0.34903
   1  -1 -13    2.74    2.39   1-0.77195-0.39774-0.63536-0.70340 0.02020 0.58908
   1   1 -13    4.43    2.46   1-0.80555-0.38949-0.55352-0.52882 0.21137 0.75408
  -1  -1  13    7.17    3.27   1-0.53505-0.95126-0.04129-0.06066 0.84380 0.30234
  -1   1  13   -1.02    3.51   1-0.59294-0.96601 0.03045 0.10332 0.80466 0.23695
  -1   1  12   29.39    3.36   1 0.35380 0.01746 0.89625 0.96475 0.26748-0.26257
  -1  -1  12   42.27    4.54   1 0.23010-0.14858 0.95702 0.93283 0.17652-0.32824
   1  -1 -12   33.93    3.90   1-0.77926-0.43734-0.62474-0.68986 0.04936 0.57689
   1   1 -12   43.02    4.46   1-0.80807-0.42427-0.53356-0.50594 0.24964 0.75100
  -1  -1  12   37.00    4.05   1-0.56002-0.94400-0.01119-0.03391 0.82840 0.32819
  -1   1  12   34.49    3.43   1-0.61619-0.95703 0.06144 0.13096 0.78519 0.25873
  -1   1  11   -0.26    3.19   1 0.33661 0.03212 0.90650 0.97179 0.25484-0.23361
  -1  -1  11   -1.82    2.58   1 0.20060-0.14623 0.96736 0.93997 0.15482-0.30833
   1  -1 -11    1.82    2.61   1-0.78522-0.47559-0.61455-0.67675 0.07577 0.56197
   1   1 -11   -0.54    2.21   1-0.80908-0.45756-0.51286-0.48232 0.28698 0.74699
  -1  -1  11   -0.04    2.64   1-0.58401-0.93576 0.01890-0.00713 0.81152 0.35256
  -1   1  11    3.78    2.94   1-0.63851-0.94712 0.09262 0.15882 0.76401 0.27879
  -1   1  10   69.33    3.78   1 0.32021 0.04758 0.91570 0.97780 0.24278-0.20406
  -1  -1  10   64.09    3.39   1 0.16956-0.14542 0.97663 0.94605 0.13200-0.28955
   1  -1 -10   68.70    3.76   1-0.78994-0.51259-0.60513-0.66441 0.09902 0.54387
   1   1 -10   57.81    3.78   1-0.80862-0.48938-0.49139-0.45793 0.32349 0.74215
  -1   1  10   64.83    3.49   1-0.66001-0.93638 0.12421 0.18706 0.74091 0.29695
  -1   1   9    2.86    1.87   1 0.30490 0.06412 0.92381 0.98270 0.23152-0.17371
  -1  -1   9    5.28    3.07   1 0.13649-0.14664 0.98477 0.95098 0.10768-0.27226
   1  -1  -9   -0.07    2.21   1-0.79349-0.54843-0.59694-0.65331 0.11842 0.52192
   1   1  -9   -0.22    2.23   1-0.80673-0.51977-0.46914-0.43276 0.35927 0.73658
  -1  -1   9    2.36    2.27   1-0.62959-0.91688 0.07998 0.04726 0.77279 0.39633
  -1   1   9    2.21    2.56   1-0.68060-0.92502 0.15619 0.21533 0.71580 0.31299
  -1   1   8  398.17    9.51   1 0.29112 0.08219 0.93071 0.98641 0.22138-0.14225
  -1  -1   8  401.23    9.70   1 0.09993-0.15065 0.99170 0.95418 0.08080-0.25853
   1  -1  -8  421.90    7.27   1-0.79591-0.58314-0.59063-0.64407 0.13292 0.49508
   1   1  -8  418.75    7.15   1-0.80342-0.54872-0.44602-0.40672 0.39443 0.73039
  -1  -1   8  414.01    7.19   1-0.65155-0.90661 0.11158 0.07553 0.75035 0.41514
  -1   1   8  391.84   10.02   1-0.70073-0.91289 0.18945 0.24531 0.68780 0.32625
  -1   1   7   -1.97    2.11   1 0.27954 0.10247 0.93623 0.98872 0.21287-0.10915
  -1  -1   7   -0.57    1.87   1 0.06018-0.15865 0.99685 0.95619 0.05156-0.24602
   1  -1  -7    0.75    2.28   1-0.79715-0.61667-0.58711-0.63763 0.14085 0.46167
   1   1  -7    3.34    2.43   1-0.79864-0.57621-0.42193-0.37972 0.42911 0.72372
  -1  -1   7   -1.85    1.84   1-0.67329-0.89613 0.14463 0.10524 0.72508 0.43112
  -1   1   7    3.61    2.60   1-0.72033-0.90023 0.22422 0.27679 0.65638 0.33609
  -1   1   6  533.94   10.09   1 0.27136 0.12613 0.93998 0.98928 0.20685-0.07357
  -1  -1   6  543.78   10.35   1 0.01473-0.17234 0.99972 0.95592 0.01814-0.23769
   1  -1  -6  536.19   10.69   1-0.79693-0.64873-0.58775-0.63536 0.13940 0.41887
   1   1  -6  560.72   10.70   1-0.79231-0.60217-0.39670-0.35156 0.46353 0.71679
  -1  -1   6  525.60   10.10   1-0.69518-0.88588 0.18005 0.13704 0.69591 0.44319
  -1   1   6  546.01   10.54   1-0.73949-0.88714 0.26128 0.31056 0.62038 0.34135
  -1   1   5   11.10    2.01   1 0.26867 0.15530 0.94118 0.98728 0.20488-0.03393
  -1  -1   5    5.54    2.68   1-0.03956-0.19487 0.99897 0.95204-0.02177-0.23587
   1  -1  -5   10.02    2.14   1-0.79438-0.67846-0.59470-0.63938 0.12362 0.36175
   1   1  -5    6.34    2.09   1-0.78429-0.62642-0.36999-0.32194 0.49798 0.70989
  -1  -1   5    9.15    2.07   1-0.71817-0.87662 0.22027 0.17398 0.66007 0.44861
  -1   1   5   10.37    2.60   1-0.75832-0.87371 0.30188 0.34787 0.57776 0.33999
  -1   1   4  113.48    4.18   1 0.27580 0.19428 0.93796 0.98085 0.21012 0.01290
  -1  -1   4  127.78    4.71   1-0.10853-0.23209 0.99144 0.94137-0.07250-0.24485
   1  -1  -4  123.44    4.35   1-0.78697-0.70335-0.61121-0.65297 0.08413 0.28092
   1   1  -4  123.49    4.38   1-0.77425-0.64865-0.34126-0.29028 0.53298 0.70354
  -1  -1   4  116.26    3.93   1-0.74357-0.86976 0.26966 0.22009 0.61186 0.44166
  -1   1   4  127.06    4.58   1-0.77678-0.85992 0.34814 0.39084 0.52478 0.32827
  -1   1   3   16.19    2.52   1 0.30288 0.25321 0.92484 0.96454 0.23004 0.07442
  -1  -1   3   19.14    2.71   1-0.20395-0.29579 0.96853 0.91533-0.14266-0.27325
   1  -1  -3   15.60    2.39   1-0.76696-0.71562-0.64168-0.68052 0.00192 0.15737
   1   1  -3   19.63    2.79   1-0.76154-0.66821-0.30938-0.25549 0.56950 0.69871
  -1  -1   3   20.63    3.85   1-0.77399-0.86794 0.34058 0.28772 0.53378 0.40483
  -1   1   3   11.92    2.39   1-0.79425-0.84514 0.40393 0.44334 0.45386 0.29861
  -1   1   2   39.95    2.63   1 0.37994 0.36208 0.87945 0.91600 0.28670 0.17272
  -1  -1   2   41.47    2.80   1-0.35173-0.41181 0.90172 0.84538-0.25133-0.34019
   1  -1  -2   46.47    4.51   1-0.70841-0.68937-0.68685-0.72279-0.16241-0.04830
   1   1  -2   39.74    3.01   1-0.74461-0.68356-0.27184-0.21503 0.60962 0.69749
  -1   1   2   37.89    2.88   1-0.80753-0.82625 0.47677 0.51276 0.34722 0.23319
  -1  -1   2   43.24    3.22   1-0.80762-0.86931 0.47766 0.42151 0.34580 0.25811
   1   1  -2   36.77    2.63   1-0.78497-0.72324 0.61502 0.67128 0.07458 0.16217
   1   1  -1  173.47    5.59   1-0.63808-0.60966 0.61602 0.67545-0.46190-0.41481
  -1  -1   1  197.63    5.81   1-0.59426-0.62269 0.67987 0.62043-0.42967-0.47677
   1  -1  -1  192.09    5.09   1-0.62697-0.64107-0.63326-0.66614-0.45373-0.38115
  -1   1   1  164.80    5.02   1-0.58701-0.57378-0.71222-0.67919-0.38490-0.45767
   1  -1  -1  195.40    5.53   1-0.53035-0.54358-0.70965-0.74270-0.46380-0.39103
  -1  -1   1  171.45    5.38   1-0.68650-0.71527-0.16571-0.22544 0.70798 0.66147
  -1  -1   1  169.07    4.55   1 0.24582 0.21614-0.63832-0.69763 0.72945 0.68307
   1  -1  -1  167.18    5.17   1-0.78683-0.80041 0.61149 0.57873 0.08344 0.15621
  -1  -1   1  183.62    4.74   1-0.47894-0.50838 0.70230 0.64281-0.52667-0.57300
   1  -1   0    0.96    1.71   1-0.65775-0.70370 0.58346 0.55344-0.47636-0.44553
  -1   1   0   -2.05    1.16   1-0.70620-0.66025 0.48902 0.51904-0.51199-0.54282
   1   1   0   -0.92    2.19   1-0.80887-0.81217-0.02375 0.03887-0.58749-0.58212
  -1  -1   0    1.09    2.75   1-0.80847-0.80518 0.03950-0.02312-0.58720-0.59257
  -1   1   0   -0.08    2.23   1-0.18429-0.13878-0.59826-0.56807-0.77981-0.81119
   1  -1   0    1.05    2.76   1-0.13422-0.17972-0.57250-0.60270-0.80883-0.77746
   1   1   0   -0.71    2.09   1-0.66346-0.66697-0.12945-0.06680 0.73692 0.74208
  -1  -1   0   -1.14    1.48   1-0.62057-0.61706-0.06743-0.13008 0.78124 0.77608
   1   1   0    2.96    2.10   1-0.46030-0.46299-0.12503-0.06234 0.87891 0.88416
  -1  -1   0    1.03    1.49   1-0.51721-0.51453-0.06209-0.12478 0.85360 0.84834
   1  -1   0   -0.75    2.04   1-0.63032-0.67618 0.70915 0.67963-0.31589-0.28438
  -1   1   0   -2.35    2.13   1-0.66687-0.62100 0.70204 0.73156-0.24983-0.28134
  -1   1  -1  200.82    5.70   1-0.32788-0.25012 0.91533 0.94222-0.23379-0.22282
  -1   1  -1  194.84    5.51   1 0.19715 0.27487-0.35234-0.32503-0.91486-0.90487
   1  -1   1  223.30    5.59   1 0.14161 0.06345-0.58833-0.61431 0.79612 0.78650
  -1   1  -1  213.34    5.43   1 0.02446 0.10263-0.52160-0.49561 0.85283 0.86245
   1   1   1  214.58    5.78   1-0.61127-0.64627 0.05477 0.12082 0.78951 0.75347
   1  -1   2   26.43    2.67   1-0.10976-0.21927 0.99124 0.96747-0.07340-0.12614
  -1  -1  -2   27.14    2.63   1-0.50227-0.43528-0.78527-0.85428-0.36203-0.28413
  -1  -1  -2   28.30    2.40   1-0.77079-0.70266-0.63688-0.70536 0.01586 0.09334
   1   1   2   25.02    2.25   1-0.79925-0.86730-0.42471-0.35622 0.42521 0.34768
  -1   1  -2   24.18    2.43   1-0.49250-0.38241 0.09003 0.11421 0.86564 0.91690
   1  -1   2   24.93    3.32   1-0.29402-0.40432-0.28543-0.30810 0.91218 0.86115
  -1   1  -2   18.60    2.76   1-0.44962-0.33931-0.13632-0.11365 0.88275 0.93378
   1   1   2   25.01    2.76   1-0.64677-0.71400 0.10456 0.17396 0.75547 0.67818
   1  -1   3   78.47    3.52   1-0.03157-0.17284 0.99937 0.97874-0.01590-0.11039
  -1  -1  -3   72.28    4.08   1-0.80707-0.70674-0.54310-0.61451 0.23165 0.35054
  -1   1  -3   71.15    3.36   1-0.60960-0.46723-0.05250-0.03124 0.79096 0.88358
   1  -1   3   74.03    3.26   1-0.45059-0.59309-0.13529-0.15457 0.88241 0.79015
   1   1   3   79.04    3.38   1-0.65574-0.75519 0.11779 0.19052 0.74574 0.62719
   1   1   4   69.17    3.44   1 0.36243 0.23148 0.89087 0.96626 0.27382 0.11290
   1  -1   4   71.31    3.47   1 0.02166-0.15135 0.99949 0.98200 0.02324-0.11298
  -1  -1  -4   68.90    3.26   1-0.80894-0.67634-0.51875-0.59307 0.27658 0.43682
  -1   1  -4   66.07    3.37   1-0.67676-0.50212-0.15008-0.13173 0.72074 0.85470
   1  -1   4   64.43    3.11   1-0.50933-0.68416-0.07111-0.08728 0.85762 0.72408
   1   1   4   68.66    3.49   1-0.65460-0.78629 0.11611 0.19217 0.74699 0.58720
   1   1   5   78.75    3.67   1 0.34130 0.17849 0.90377 0.98235 0.25828 0.05576
   1  -1   5   73.08    3.21   1 0.06346-0.14132 0.99652 0.98216 0.05397-0.12399
  -1  -1  -5   63.11    3.29   1-0.80901-0.64413-0.51637-0.59362 0.28080 0.48238
  -1   1  -5   74.48    3.50   1-0.71932-0.51240-0.22237-0.20694 0.65812 0.83343
   1  -1   5   80.43    3.30   1-0.53291-0.73997-0.04381-0.05665 0.84503 0.67023
   1   1   5   75.69    3.23   1-0.64833-0.81225 0.10684 0.18624 0.75382 0.55277
   1   1   6   39.36    3.52   1 0.33303 0.13838 0.90855 0.99034 0.25221 0.00807
   1  -1   6   32.80    3.56   1 0.09907-0.13747 0.99184 0.98062 0.08016-0.13955
  -1  -1  -6   32.34    3.26   1-0.80878-0.61163-0.52293-0.60309 0.26910 0.51204
  -1   1  -6   32.60    3.00   1-0.74830-0.50910-0.27965-0.26713 0.60153 0.81819
   1  -1   6   35.37    3.04   1-0.54030-0.77959-0.03506-0.04457 0.84073 0.62469
   1   1   6   33.64    3.29   1-0.63887-0.83501 0.09313 0.17586 0.76365 0.52135
   1   1   7  139.07    4.53   1 0.33263 0.10612 0.90878 0.99377 0.25191-0.03382
   1  -1   7  133.77    4.45   1 0.13162-0.13723 0.98581 0.97812 0.10410-0.15633
  -1  -1  -7  135.91    4.63   1-0.80805-0.57863-0.53377-0.61685 0.24926 0.53355
  -1   1  -7  128.90    4.62   1-0.76891-0.49744-0.32737-0.31778 0.54917 0.80719
   1  -1   7  145.03    4.66   1-0.53890-0.81042-0.03673-0.04290 0.84156 0.58427
   1   1   7  139.18    4.78   1-0.62713-0.85550 0.07653 0.16259 0.77514 0.49159
   1   1   8   34.22    3.26   1 0.33733 0.07897 0.90608 0.99427 0.25537-0.07197
   1  -1   8   49.72    3.52   1 0.16111-0.13960 0.97888 0.97439 0.12578-0.17626
  -1  -1  -8   41.65    3.37   1-0.80658-0.54488-0.54684-0.63284 0.22446 0.55010
  -1   1  -8   38.46    2.89   1-0.78385-0.48010-0.36863-0.36196 0.49968 0.79904
   1  -1   8   47.08    3.30   1-0.53202-0.83577-0.04486-0.04770 0.84553 0.54699
   1   1   8   48.71    3.50   1-0.61358-0.87418 0.05789 0.14729 0.78750 0.46270
   1   1   9   21.79    2.95   1 0.34552 0.05530 0.90126 0.99265 0.26139-0.10755
   1  -1   9   18.60    3.11   1 0.18894-0.14362 0.97103 0.96974 0.14624-0.19740
  -1  -1  -9   18.12    2.38   1-0.80416-0.51018-0.56109-0.65001 0.19621 0.56319
  -1   1  -9   20.88    2.91   1-0.79460-0.45859-0.40527-0.40151 0.45205 0.79276
   1  -1   9   19.64    2.82   1-0.52135-0.85733-0.05732-0.05682 0.85141 0.51162
   1   1   9   19.32    2.29   1-0.59848-0.89132 0.03771 0.13045 0.80024 0.43419
   1   1  10    0.57    2.25   1 0.35618 0.03412 0.89478 0.98937 0.26923-0.14131
   1  -1  10    1.91    2.73   1 0.21557-0.14884 0.96230 0.96420 0.16583-0.21942
  -1  -1 -10    2.80    2.49   1-0.80067-0.47425-0.57572-0.66756 0.16573 0.57396
  -1   1 -10    1.83    2.04   1-0.80205-0.43376-0.43843-0.43759 0.40556 0.78762
   1  -1  10    1.44    2.36   1-0.50779-0.87599-0.07286-0.06903 0.85839 0.47735
   1   1  10   -0.74    2.94   1-0.58199-0.90705 0.01632 0.11239 0.81303 0.40573
   1   1  11    0.80    2.14   1 0.36866 0.01474 0.88688 0.98467 0.27841-0.17375
   1  -1  11    1.62    2.77   1 0.24132-0.15494 0.95269 0.95779 0.18476-0.24209
  -1  -1 -11   -2.71    2.62   1-0.79586-0.43716-0.59077-0.68554 0.13259 0.58217
  -1   1 -11    4.56    2.48   1-0.80671-0.40614-0.46887-0.47095 0.35968 0.78309
   1  -1  11    4.70    2.39   1-0.49186-0.89230-0.09073-0.08357 0.86593 0.44363
   1   1  11   -2.93    2.77   1-0.56417-0.92146-0.00608 0.09332 0.82563 0.37708
   1   1  12    0.60    2.32   1 0.38250-0.00326 0.87772 0.97871 0.28858-0.20517
   1  -1  12    2.42    2.30   1 0.26638-0.16174 0.94220 0.95051 0.20319-0.26527
  -1  -1 -12   -4.73    2.58   1-0.78964-0.39865-0.60576-0.70344 0.09750 0.58841
  -1   1 -12   -4.17    2.36   1-0.80888-0.37604-0.49709-0.50209 0.31401 0.77877
   1  -1  12   -0.73    3.23   1-0.47453-0.90674-0.10975-0.09852 0.87336 0.41000
   1   1  12    0.06    2.83   1-0.54506-0.93458-0.02936 0.07336 0.83787 0.34808
   1  -1  13    5.16    3.26   1 0.29090-0.16907 0.93082 0.94232 0.22123-0.28884
  -1  -1 -13    1.37    2.96   1-0.78187-0.35859-0.62048-0.72109 0.06055 0.59281
  -1   1 -13   -2.52    2.52   1-0.80875-0.34364-0.52342-0.53134 0.26821 0.77432
   1  -1  13    5.99    2.85   1-0.45474-0.91914-0.13092-0.11631 0.88094 0.37634
   1   1  13    1.85    3.22   1-0.52468-0.94643-0.05345 0.05261 0.84961 0.31856
   1  -1  14   12.49    3.37   1 0.31499-0.17684 0.91852 0.93323 0.23894-0.31274
  -1  -1 -14    0.97    3.25   1-0.42226 0.02762-0.85426-0.96150-0.30319 0.27340
  -1   1 -14    2.22    2.91   1-0.80640-0.30901-0.54810-0.55894 0.22201 0.76947
   1  -1  14    6.15    3.43   1-0.43318-0.92977-0.15340-0.13539 0.88815 0.34232
   1   1  14    4.17    3.78   1-0.50301-0.95699-0.07826 0.03113 0.86072 0.28842
   1  -1  15    2.65    4.43   1 0.33871-0.18497 0.90528 0.92319 0.25638-0.33690
  -1  -1 -15    1.00    3.67   1-0.43858 0.04321-0.84159-0.95202-0.31520 0.30295
  -1   1 -15   -0.26    3.63   1-0.80184-0.27217-0.57128-0.58504 0.17515 0.76396
   1  -1  15    5.01    3.38   1-0.40987-0.93865-0.17702-0.15563 0.89479 0.30773
   1   1  15   -2.72    4.36   1-0.48065-0.96620-0.10308 0.01044 0.87082 0.25757
   1  -1  16    4.39    3.79   1 0.36212-0.19340 0.89106 0.91217 0.27360-0.36128
  -1  -1 -16    2.15    4.32   1-0.45542 0.05828-0.82781-0.94142-0.32758 0.33213
   1   1  16   -4.29    4.39   1-0.45634-0.97407-0.12924-0.01231 0.88036 0.22588
   1  -1  17   -7.63    5.14   1 0.38528-0.20210 0.87583 0.90014 0.29063-0.38586
  -1  -1 -17   -2.12    4.11   1-0.47266 0.07295-0.81290-0.92970-0.34026 0.36101
  -1  -3  17   12.82    5.47   1 0.28607-0.29423 0.93315 0.83228 0.21767-0.46981
   1  -3 -17   10.82    4.57   1-0.53891-0.08530-0.74717-0.92335-0.38898 0.37434
  -1   3  17    2.87    4.37   1-0.52876-0.98759-0.04869 0.12973 0.84737 0.08840
  -1  -3  16    6.41    3.60   1 0.25514-0.29330 0.94704 0.84297 0.19493-0.45095
   1  -3 -16    0.77    3.77   1-0.52627-0.10458-0.76083-0.93383-0.37968 0.34207
   1   3 -16    1.71    3.65   1-0.80638-0.25145-0.54821-0.43959 0.22179 0.86227
  -1   3  16    4.46    4.64   1-0.55435-0.98096-0.01814 0.15696 0.83208 0.11436
  -1  -3  15   23.86    3.38   1 0.22312-0.29347 0.95960 0.85233 0.17138-0.43289
   1  -3 -15    8.02    3.31   1-0.51457-0.12478-0.77298-0.94279-0.37108 0.30912
   1   3 -15   12.64    4.03   1-0.80867-0.28601-0.52505-0.41351 0.26527 0.86440
  -1   3  15    9.29    3.46   1-0.57868-0.97307 0.01212 0.18389 0.81545 0.13899
  -1  -3  14   33.84    5.09   1 0.18980-0.29494 0.97077 0.86030 0.14688-0.41579
   1  -3 -14   32.25    3.79   1-0.50402-0.14614-0.78355-0.95017-0.36332 0.27532
   1   3 -14   26.66    3.93   1-0.80900-0.31861-0.50077-0.38631 0.30780 0.86558
  -1   3  14   39.53    5.52   1-0.60185-0.96400 0.04217 0.21060 0.79748 0.16227
  -1  -3  13    2.64    3.13   1 0.15491-0.29798 0.98046 0.86679 0.12122-0.39984
   1  -3 -13   11.20    3.52   1-0.49490-0.16892-0.79240-0.95584-0.35661 0.24047
   1  -3 -13    8.40    2.80   1-0.68200-0.34984-0.69754-0.85834-0.21978 0.37530
   1   3 -13    3.40    2.55   1-0.80740-0.34929-0.47534-0.35796 0.34950 0.86594
  -1   3  13    3.33    3.13   1-0.62392-0.95384 0.07207 0.23717 0.77815 0.18418
  -1  -3  12   21.50    3.19   1 0.11761-0.30252 0.98861 0.87097 0.09379-0.38714
   1  -3 -12   22.04    4.06   1-0.48755-0.19349-0.79933-0.95959-0.35121 0.20431
   1  -3 -12   14.27    2.91   1-0.68873-0.38885-0.69519-0.85307-0.20581 0.34793
   1   3 -12   21.80    3.13   1-0.80386-0.37803-0.44866-0.32836 0.39051 0.86560
  -1  -3  12   19.33    2.90   1-0.45161-0.87846-0.13422-0.24837 0.88205 0.40817
  -1   3  12   17.18    3.81   1-0.64495-0.94264 0.10191 0.26367 0.75739 0.20468
  -1  -3  11    4.78    3.44   1 0.07843-0.30994 0.99479 0.87401 0.06499-0.37420
   1  -3 -11   -4.51    2.71   1-0.48247-0.22031-0.80404-0.96111-0.34747 0.16650
   1  -3 -11    0.68    2.64   1-0.69259-0.42499-0.69373-0.84869-0.19761 0.31479
   1   3 -11    0.34    2.65   1-0.79834-0.40478-0.42062-0.29740 0.43095 0.86469
  -1  -3  11   -0.06    1.92   1-0.47296-0.86762-0.11145-0.22899 0.87400 0.44135
  -1   3  11   -1.01    3.20   1-0.66499-0.93045 0.13178 0.29021 0.73513 0.22366
  -1  -3  10   53.29    3.88   1 0.03633-0.32027 0.99875 0.87484 0.03403-0.36341
   1  -3 -10   51.23    3.48   1-0.48027-0.25003-0.80604-0.95993-0.34586 0.12655
   1  -3 -10   54.34    3.36   1-0.69314-0.45781-0.69352-0.84556-0.19643 0.27462
   1   3 -10   45.85    3.55   1-0.79073-0.42944-0.39105-0.26492 0.47097 0.86335
  -1  -3  10   40.66    2.81   1-0.49204-0.85451-0.09053-0.21146 0.86584 0.47443
  -1   3  10   53.81    3.11   1-0.68392-0.91753 0.16153 0.31624 0.71144 0.24107
  -1  -3   9    3.06    2.11   1-0.00946-0.33432 0.99995 0.87290 0.00035-0.35535
   1  -3  -9    4.31    2.02   1-0.48186-0.28352-0.80459-0.95529-0.34703 0.08382
   1  -3  -9    3.81    2.34   1-0.68957-0.48653-0.69487-0.84400-0.20402 0.22569
   1   3  -9    4.59    2.37   1-0.78087-0.45186-0.35974-0.23069 0.51070 0.86174
  -1  -3   9    3.07    1.96   1-0.50777-0.83821-0.07287-0.19783 0.85839 0.50819
  -1   3   9    2.85    2.86   1-0.70214-0.90350 0.19186 0.34329 0.68569 0.25658
  -1  -3   8  153.33    5.56   1-0.06002-0.35312 0.99751 0.86732-0.03682-0.35078
   1  -3  -8  173.89    6.08   1-0.48848-0.32205-0.79847-0.94598-0.35189 0.03740
   1  -3  -8  160.03    5.85   1-0.68051-0.50974-0.69803-0.84424-0.22281 0.16555
  -1  -3   8  146.54    4.90   1-0.52073-0.81894-0.05803-0.18631 0.85174 0.54278
  -1   3   8  158.92    5.46   1-0.71949-0.88859 0.22268 0.37082 0.65783 0.26997
  -1  -3   7   24.48    3.14   1-0.11680-0.37813 0.99004 0.85671-0.07857-0.35079
   1  -3  -7   21.44    2.87   1-0.50189-0.36737-0.78564-0.92996-0.36175-0.01401
   1  -3  -7   19.05    2.48   1-0.66357-0.52508-0.70289-0.84618-0.25615 0.09087
   1   3  -7   18.09    2.35   1-0.75328-0.48882-0.29051-0.15562 0.59004 0.85838
  -1  -3   7   20.08    2.10   1-0.52850-0.79447-0.04900-0.18062 0.84751 0.57981
  -1   3   7   18.42    2.66   1-0.73599-0.87284 0.25424 0.39909 0.62743 0.28083
  -1  -3   6  107.83    4.43   1-0.18166-0.41133 0.97522 0.83879-0.12627-0.35668
   1  -3  -6  120.63    4.45   1-0.52465-0.42203-0.76254-0.90368-0.37849-0.07231
   1  -3  -6  110.77    4.28   1-0.63472-0.52851-0.70854-0.84891-0.30835-0.00267
   1   3  -6  106.40    4.59   1-0.73463-0.50245-0.25155-0.11374 0.63010 0.85709
  -1  -3   6  104.91    3.70   1-0.52706-0.76080-0.05068-0.18564 0.84831 0.62185
  -1   3   6  109.92    4.12   1-0.75164-0.85624 0.28690 0.42846 0.59389 0.28856
  -1  -3   5   38.81    2.82   1-0.25754-0.45545 0.94895 0.80938-0.18207-0.37075
   1  -3  -5   43.43    2.75   1-0.56033-0.48962-0.72264-0.86060-0.40472-0.14010
   1  -3  -5   31.30    2.55   1-0.58741-0.51348-0.71221-0.84967-0.38430-0.11996
   1   3  -5   39.08    2.72   1-0.71171-0.51180-0.20861-0.06787 0.67077 0.85641
  -1  -3   5   36.67    2.28   1-0.50538-0.70689-0.07559-0.21347 0.85957 0.67433
  -1   3   5   36.16    2.85   1-0.76642-0.83876 0.32117 0.45944 0.55627 0.29219
  -1  -3   4    0.98    2.04   1-0.34766-0.51380 0.90413 0.76142-0.24834-0.39528
   1  -3  -4    2.86    2.12   1-0.61333-0.57453-0.65341-0.78817-0.44370-0.22064
   1  -3  -4    6.86    1.83   1-0.51180-0.47015-0.70749-0.84206-0.48733-0.26435
   1   3  -4    4.45    2.74   1-0.68321-0.51557-0.16037-0.01672 0.71239 0.85668
  -1  -3   4    1.64    1.71   1-0.40631-0.57563-0.18057-0.32184 0.89571 0.75170
  -1   3   4    3.96    2.58   1-0.78021-0.82029 0.35782 0.49281 0.51305 0.29023
  -1  -3   3   14.45    2.66   1-0.45508-0.58945 0.82809 0.68224-0.32733-0.43253
   1  -3  -3   13.49    2.19   1-0.68624-0.67935-0.53079-0.66237-0.49732-0.31581
   1  -3  -3   12.44    2.26   1-0.39719-0.38781-0.68283-0.81448-0.61316-0.43152
   1   3  -3   11.72    2.62   1-0.64698-0.51161-0.10486 0.04170 0.75525 0.85819
  -1   3   3   15.24    3.33   1-0.79269-0.80053 0.39808 0.52979 0.46168 0.28012
  -1  -3   2    4.81    2.63   1-0.57833-0.68114 0.70059 0.55169-0.41796-0.48132
   1  -3  -2    4.82    2.30   1-0.76806-0.79308-0.31508-0.44348-0.55748-0.41754
   1  -3  -2    3.08    2.35   1-0.23908-0.26199-0.62405-0.75293-0.74390-0.60369
   1   3  -2    8.64    2.58   1-0.59944-0.49635-0.03898 0.11050 0.79946 0.86105
   1   3  -2    1.03    1.04   1-0.23396-0.12885-0.33642-0.18843 0.91218 0.97359
  -1   3   2    4.20    2.43   1-0.80305-0.77863 0.44390 0.57231 0.39756 0.25726
  -1  -3   1   18.59    2.87   1-0.70321-0.77434 0.49556 0.34355-0.50980-0.53137
   1  -3  -1   18.16    2.82   1-0.80896-0.86546 0.01841-0.10724-0.58756-0.48935
   1  -3  -1   18.82    2.64   1-0.05468-0.10983-0.52747-0.65343-0.84780-0.74896
   1   3  -1   18.89    2.58   1-0.53433-0.46351 0.04215 0.19455 0.84422 0.86446
   1   3  -1   14.52    3.07   1-0.65834-0.58574 0.12170 0.27333 0.74281 0.76301
  -1   3   1   14.94    2.82   1-0.80893-0.75234 0.49867 0.62367 0.31136 0.21214
   1  -3   0   31.01    2.95   1-0.74366-0.83214 0.39477 0.27217-0.53954-0.48316
  -1  -3   0   27.70    2.55   1-0.79127-0.83057 0.20924 0.05407-0.57454-0.55428
   1  -3   0   32.58    2.83   1 0.12634 0.03898-0.40666-0.52970-0.90479-0.84728
   1   3   0   31.41    2.79   1-0.44053-0.40199 0.14581 0.30113 0.88581 0.86470
   1   3   0   30.24    2.61   1-0.70197-0.66174 0.19158 0.34658 0.68594 0.66481
  -1   3   0   31.74    3.08   1-0.80293-0.71405 0.56678 0.68855 0.18455 0.12659
   1  -3   1   26.01    2.77   1-0.59980-0.72013 0.67237 0.55289-0.43375-0.41919
  -1  -3  -1   25.18    2.77   1-0.80509-0.81240-0.09961-0.25799-0.58471-0.52290
  -1  -3  -1   30.22    2.83   1 0.28428 0.27827-0.27963-0.43801-0.91705-0.85480
   1  -3   1   23.50    3.02   1 0.28120 0.16162-0.28231-0.40247-0.91718-0.90105
   1   3   1   27.60    2.82   1-0.71173-0.70375 0.20863 0.36692 0.67075 0.60835
  -1   3  -1   19.73    3.53   1-0.75927-0.63810 0.65031 0.76885-0.02434-0.04104
   1  -3   2  112.68    4.05   1-0.45343-0.60547 0.82948 0.71307-0.32612-0.35344
  -1  -3  -2  109.97    4.34   1-0.75779-0.73363-0.35115-0.51249-0.54993-0.44623
  -1  -3  -2   96.06    3.67   1 0.07198 0.09820-0.44562-0.60689-0.89232-0.78869
   1   3   2  104.50    4.18   1-0.71135-0.73562 0.20795 0.36954 0.67136 0.56770
  -1   3  -2  104.63    4.45   1-0.59800-0.44454 0.71191 0.82721-0.36820-0.34364
   1  -3   3   -0.06    2.15   1-0.33316-0.51697 0.91242 0.79915-0.23767-0.30673
  -1  -3  -3    2.55    2.84   1-0.69084-0.63477-0.52157-0.68609-0.50070-0.35543
  -1  -3  -3    0.30    1.72   1-0.18263-0.12417-0.59744-0.76170-0.78083-0.63591
  -1   3  -3    2.48    2.44   1-0.49998-0.31557 0.08167 0.19562 0.86217 0.92851
   1  -3   3    0.65    2.39   1 0.28057 0.09456-0.65288-0.76418 0.70357 0.63802
   1   3   3    3.81    2.39   1-0.70632-0.76285 0.19910 0.36397 0.67931 0.53439
   1  -3   4    2.83    2.42   1-0.23806-0.45364 0.95665 0.84653-0.16775-0.27854
  -1  -3  -4   -0.79    2.27   1-0.63042-0.54245-0.62799-0.79570-0.45627-0.26945
  -1  -3  -4    0.68    1.58   1-0.40270-0.31198-0.68440-0.85149-0.60778-0.42145
  -1   3  -4   -0.13    1.81   1-0.57065-0.35397-0.00199 0.10903 0.82118 0.92887
   1  -3   4    0.65    1.62   1-0.02134-0.23946-0.49260-0.60051 0.86998 0.76291
   1   3   4   -1.02    2.05   1-0.69853-0.78732 0.18571 0.35386 0.69105 0.50487
   1  -3   5    0.95    2.18   1-0.16163-0.40892 0.98052 0.87350-0.11154-0.26415
  -1  -3  -5    0.53    2.30   1-0.58388-0.46399-0.69351-0.86440-0.42204-0.19366
  -1  -3  -5   -1.60    1.67   1-0.54215-0.41914-0.71071-0.88071-0.44827-0.22058
  -1   3  -5    0.51    1.86   1-0.62540-0.37644-0.07412 0.03398 0.77677 0.92581
   1  -3   5   -1.13    1.43   1-0.19350-0.44385-0.36899-0.47349 0.90906 0.76078
   1   3   5    1.22    2.18   1-0.68880-0.80984 0.16947 0.34091 0.70486 0.47742
   1  -3   6  128.17    4.78   1-0.09804-0.37709 0.99307 0.88918-0.06478-0.25913
  -1  -3  -6  131.01    4.58   1-0.55057-0.39878-0.73403-0.90812-0.39755-0.12761
  -1  -3  -6  122.07    4.21   1-0.61954-0.46426-0.71039-0.88331-0.33390-0.06486
  -1   3  -6  120.14    4.34   1-0.66840-0.38717-0.13702-0.03183 0.73106 0.92145
   1  -3   6  126.92    4.19   1-0.28521-0.56752-0.29311-0.39436 0.91254 0.72276
   1   3   6  123.49    4.51   1-0.67751-0.83080 0.15127 0.32600 0.71978 0.45109
   1  -3   7    5.03    3.03   1-0.04356-0.35437 0.99874 0.89799-0.02472-0.26081
  -1  -3  -7    2.30    2.26   1-0.52798-0.34427-0.75902-0.93629-0.38093-0.06944
  -1  -3  -7    2.66    1.70   1-0.66120-0.47364-0.70347-0.87930-0.26063 0.04975
  -1   3  -7   -2.87    2.52   1-0.70259-0.38909-0.19264-0.09037 0.68501 0.91675
   1  -3   7    1.40    1.43   1-0.33231-0.64681-0.25115-0.34900 0.90911 0.67810
   1   3   7    4.68    2.36   1-0.66502-0.85026 0.13183 0.31013 0.73509 0.42529
   1  -3   8   73.91    3.61   1 0.00438-0.33818 0.99993 0.90232 0.01053-0.26729
  -1  -3  -8   63.86    3.81   1-0.51363-0.29802-0.77394-0.95440-0.37038-0.01733
  -1  -3  -8   67.84    3.72   1-0.68324-0.46340-0.69712-0.87588-0.21723 0.13449
  -1   3  -8   73.25    3.53   1-0.72999-0.38421-0.24248-0.14313 0.63899 0.91208
   1  -3   8   59.84    3.18   1-0.35581-0.70250-0.22937-0.32384 0.90596 0.63372
   1   3   8   70.10    3.45   1-0.65120-0.86866 0.11106 0.29270 0.75073 0.39968
   1  -3   9    9.96    2.42   1 0.04754-0.32678 0.99797 0.90349 0.04227-0.27730
  -1  -3  -9    5.86    2.32   1-0.50558-0.25806-0.78201-0.96565-0.36446 0.03014
  -1  -3  -9    8.20    1.92   1-0.69397-0.44185-0.69319-0.87486-0.19464 0.19843
  -1   3  -9    9.46    2.57   1-0.75199-0.37394-0.28766-0.19123 0.59308 0.90752
   1  -3   9    6.58    2.27   1-0.36522-0.74411-0.22049-0.31157 0.90442 0.59094
   1   3   9    7.93    3.09   1-0.63623-0.88592 0.08936 0.27433 0.76630 0.37400
   1  -3  10    0.36    2.26   1 0.08708-0.31900 0.99364 0.90230 0.07135-0.28997
  -1  -3 -10   -5.45    3.25   1-0.50235-0.22293-0.78518-0.97201-0.36209 0.07407
  -1  -3 -10    2.43    2.29   1-0.69760-0.41321-0.69171-0.87630-0.18674 0.24767
  -1   3 -10    3.41    3.21   1-0.76957-0.35924-0.32906-0.23555 0.54723 0.90302
   1  -3  10   -0.94    1.94   1-0.36547-0.77654-0.22026-0.30795 0.90438 0.54967
   1   3  10    3.14    3.18   1-0.62015-0.90207 0.06686 0.25516 0.78162 0.34808
   1  -3  11    1.64    3.87   1 0.12385-0.31399 0.98741 0.89920 0.09839-0.30468
  -1  -3 -11    0.88    2.33   1-0.50287-0.19154-0.78468-0.97469-0.36247 0.11525
  -1  -3 -11    3.09    2.27   1-0.69630-0.37963-0.69225-0.87976-0.18958 0.28617
  -1   3 -11   -1.00    2.15   1-0.78341-0.34080-0.36730-0.27671 0.50134 0.89848
   1  -3  11    0.03    1.84   1-0.35927-0.80254-0.22612-0.31042 0.90542 0.50947
   1   3  11    2.68    3.28   1-0.60297-0.91711 0.04364 0.23528 0.79657 0.32177
   1  -3  12   -0.19    2.72   1 0.15891-0.31156 0.97945 0.89507 0.12416-0.31900
  -1  -3 -12   -2.71    2.70   1-0.50632-0.16308-0.78127-0.97447-0.36501 0.15427
  -1  -3 -12    0.35    2.44   1-0.69119-0.34224-0.69426-0.88469-0.20058 0.31651
  -1   3 -12    3.10    2.93   1-0.79398-0.31910-0.40288-0.31520 0.45527 0.89376
   1  -3  12    0.58    2.11   1-0.34822-0.82368-0.23647-0.31738 0.90709 0.46991
   1   3  12   -0.60    3.40   1-0.58468-0.93106 0.01977 0.21474 0.81102 0.29497
   1  -3  13    5.45    3.59   1 0.19173-0.31059 0.97017 0.88899 0.14830-0.33647
  -1  -3 -13   11.95    3.44   1-0.51210-0.13695-0.77548-0.97187-0.36926 0.19157
  -1   3 -13    4.28    3.81   1-0.80161-0.29446-0.43615-0.35139 0.40887 0.88871
   1  -3  13    0.73    2.42   1-0.33327-0.84091-0.25027-0.32779 0.90900 0.43059
   1   3  13    1.90    4.23   1-0.56527-0.94388-0.00471 0.19359 0.82488 0.26758
   1  -3  14   -0.04    3.04   1 0.22315-0.31103 0.95959 0.88161 0.17140-0.35497
  -1  -3 -14   -3.50    3.92   1-0.51976-0.11270-0.76766-0.96723-0.37489 0.22751
  -1   3 -14    0.58    3.01   1-0.80653-0.26710-0.46740-0.38556 0.36198 0.88317
   1   3  14    2.75    4.40   1-0.54471-0.95555-0.02978 0.17185 0.83808 0.23954
   1  -3  15   10.64    2.92   1 0.25340-0.31263 0.94777 0.87300 0.19365-0.37433
  -1  -3 -15   15.80    4.31   1-0.52892-0.08995-0.75801-0.96077-0.38163 0.26233
  -1   3 -15   10.33    3.33   1-0.80887-0.23717-0.49683-0.41792 0.31443 0.87697
   1   3  15   14.46    4.55   1-0.52297-0.96603-0.05544 0.14953 0.85054 0.21074
   1  -3  16   -0.38    4.26   1 0.28268-0.31520 0.93476 0.86318 0.21518-0.39440
  -1  -3 -16    6.88    4.54   1-0.53932-0.06845-0.74671-0.95265-0.38928 0.29623
  -1   3 -16    0.98    4.44   1-0.80869-0.20471-0.52460-0.44861 0.26607 0.86996
   1   3  16   -1.13    4.46   1-0.49997-0.97527-0.08168 0.12662 0.86217 0.18112
   1  -3  17   -8.20    4.55   1 0.31115-0.31858 0.92055 0.85218 0.23612-0.41507
  -1  -3 -17   -4.58    3.97   1-0.55074-0.04796-0.73384-0.94297-0.39768 0.32940
   1   3  17    2.19    5.45   1-0.47633-0.98302-0.10779 0.10465 0.87263 0.15072
  -1  -5  16    5.13    3.17   1 0.18186-0.40894 0.97315 0.77640 0.14104-0.47954
   1  -5 -16   -3.27    4.72   1-0.61004-0.23117-0.65811-0.92344-0.44128 0.30628
   1   5 -16   -5.33    3.34   1-0.80878-0.21181-0.49470-0.29340 0.31801 0.93222
  -1   5  16    7.11    5.09   1-0.57513-0.95859 0.00762 0.27496 0.81802 0.07405
  -1  -5  15    0.90    2.90   1 0.14529-0.41365 0.98277 0.78282 0.11415-0.46483
   1  -5 -15    3.96    4.37   1-0.60444-0.25748-0.66598-0.92812-0.43716 0.26884
   1   5 -15    2.41    3.67   1-0.80662-0.24192-0.46813-0.26391 0.36084 0.93371
  -1   5  15   -4.27    3.44   1-0.59749-0.94872 0.03640 0.30041 0.80104 0.09832
  -1  -5  14    3.90    3.93   1 0.10673-0.41941 0.99057 0.78654 0.08580-0.45325
   1  -5 -14   -4.22    4.01   1-0.60053-0.28548-0.67137-0.93033-0.43429 0.23016
   1   5 -14    3.08    3.45   1-0.80242-0.27000-0.44043-0.23329 0.40265 0.93416
  -1   5  14   -2.36    3.25   1-0.61868-0.93769 0.06485 0.32552 0.78295 0.12148
  -1  -5  13    3.09    3.79   1 0.06663-0.42776 0.99618 0.78901 0.05631-0.44099
   1  -5 -13   -3.84    3.33   1-0.59866-0.31551-0.67393-0.92970-0.43291 0.18998
   1   5 -13   -0.28    3.43   1-0.79619-0.29604-0.41154-0.20149 0.44351 0.93368
  -1   5  13    6.95    3.82   1-0.63878-0.92556 0.09300 0.35034 0.76374 0.14352
  -1  -5  12    3.09    3.54   1 0.02430-0.43832 0.99938 0.78907 0.02518-0.43037
   1  -5 -12    5.09    3.10   1-0.59923-0.34800-0.67315-0.92573-0.43333 0.14800
   1  -5 -12    4.95    2.44   1-0.52072-0.26278-0.70861-0.95925-0.47615 0.10380
   1   5 -12    1.91    4.03   1-0.78787-0.32000-0.38139-0.16842 0.48350 0.93232
  -1   5  12    5.94    3.19   1-0.65781-0.91236 0.12090 0.37490 0.74341 0.16444
  -1  -5  11    0.38    3.12   1-0.02066-0.45153 0.99975 0.78630-0.00788-0.42170
   1  -5 -11    1.81    3.58   1-0.60276-0.38343-0.66830-0.91770-0.43593 0.10384
   1  -5 -11    1.69    2.01   1-0.51498-0.28932-0.70791-0.95563-0.48337 0.05522
   1   5 -11   -0.93    3.07   1-0.77740-0.34180-0.34988-0.13398 0.52270 0.93016
  -1   5  11   -2.49    2.75   1-0.67581-0.89813 0.14859 0.39926 0.72193 0.18421
  -1  -5  10    2.25    2.59   1-0.06877-0.46789 0.99669 0.78010-0.04326-0.41534
   1  -5 -10    2.97    3.15   1-0.60985-0.42243-0.65837-0.90459-0.44114 0.05707
   1  -5 -10    4.35    2.12   1-0.50245-0.30911-0.70619-0.95102-0.49882-0.00156
   1   5 -10    4.80    3.02   1-0.76466-0.36133-0.31685-0.09804 0.56115 0.92726
  -1   5  10    3.80    2.89   1-0.69265-0.88321 0.17584 0.42283 0.69950 0.20282
  -1  -5   9   -2.54    2.58   1-0.12064-0.48799 0.98935 0.76963-0.08140-0.41173
   1  -5  -9   -0.20    3.31   1-0.62123-0.46572-0.64187-0.88489-0.44951 0.00714
   1  -5  -9   -2.21    1.53   1-0.48186-0.32079-0.70283-0.94474-0.52328-0.06737
   1   5  -9    2.02    3.00   1-0.74947-0.37842-0.28217-0.06043 0.59889 0.92365
  -1   5   9   -1.70    3.79   1-0.70871-0.86702 0.20329 0.44700 0.67556 0.22014
  -1  -5   8   11.63    2.20   1-0.17697-0.51257 0.97652 0.75366-0.12282-0.41141
   1  -5  -8   13.80    2.86   1-0.63771-0.51411-0.61661-0.85646-0.46163-0.04652
   1  -5  -8    9.84    2.53   1-0.45129-0.32248-0.69669-0.93569-0.55762-0.14306
   1   5  -8   10.76    2.80   1-0.73160-0.39282-0.24559-0.02094 0.63595 0.91937
  -1   5   8   11.62    2.66   1-0.72381-0.84986 0.23072 0.47114 0.65027 0.23610
  -1  -5   7    6.85    3.10   1-0.23845-0.54241 0.95650 0.73056-0.16803-0.41479
   1  -5  -7    2.31    2.28   1-0.66006-0.56837-0.57944-0.81610-0.47806-0.10452
   1  -5  -7    5.74    1.90   1-0.40850-0.31197-0.68602-0.92211-0.60206-0.22885
   1   5  -7    4.93    2.24   1-0.71073-0.40423-0.20686 0.02070 0.67235 0.91442
  -1   5   7    4.83    2.83   1-0.73797-0.83177 0.25821 0.49535 0.62347 0.25056
  -1  -5   6   57.12    3.87   1-0.30616-0.57835 0.92672 0.69763-0.21782-0.42285
   1  -5  -6   63.31    3.56   1-0.68876-0.62898-0.52575-0.75922-0.49917-0.16718
   1  -5  -6   56.53    3.51   1-0.35127-0.28701-0.66837-0.90154-0.65565-0.32378
   1   5  -6   61.23    3.86   1-0.68645-0.41223-0.16564 0.06484 0.70805 0.90876
  -1   5   6   56.39    3.58   1-0.75118-0.81273 0.28589 0.51974 0.59495 0.26331
  -1  -5   5    6.15    2.58   1-0.38059-0.62102 0.88366 0.65143-0.27256-0.43585
   1  -5  -5   16.82    2.87   1-0.72327-0.69539-0.44913-0.67941-0.52454-0.23411
   1  -5  -5   16.81    2.43   1-0.27810-0.24611-0.64082-0.87108-0.71554-0.42502
   1   5  -5    9.52    2.59   1-0.65820-0.41625-0.12149 0.11191 0.74296 0.90233
  -1   5   5   11.55    2.03   1-0.76344-0.79273 0.31392 0.54448 0.56444 0.27406
  -1  -5   4    6.02    2.64   1-0.46173-0.67038 0.82245 0.58708-0.33222-0.45377
   1  -5  -4    1.60    2.34   1-0.76066-0.76469-0.34151-0.56861-0.55204-0.30317
   1  -5  -4    2.93    1.62   1-0.18842-0.18873-0.60030-0.82786-0.77725-0.52821
   1   5  -4    1.42    2.43   1-0.62524-0.41556-0.07389 0.16243 0.77692 0.89494
  -1   5   4    5.38    2.71   1-0.77472-0.77175 0.34252 0.56979 0.53149 0.28237
  -1  -5   3    2.25    2.11   1-0.54759-0.72476 0.73745 0.49910-0.39535-0.47498
   1  -5  -3   -0.42    1.70   1-0.79358-0.82952-0.19534-0.41925-0.57625-0.36893
   1  -5  -3    0.62    1.89   1-0.08736-0.11991-0.54657-0.77122-0.83284-0.62516
   1   5  -3    1.25    2.49   1-0.58655-0.40915-0.02218 0.21706 0.80960 0.88627
   1   5  -3   -0.49    1.12   1-0.41205-0.23168-0.17484 0.06195 0.89422 0.97081
  -1   5   3   -0.31    2.62   1-0.78494-0.74972 0.37200 0.59599 0.49545 0.28758
  -1  -5   2    6.96    2.69   1-0.63461-0.77995 0.62149 0.37995-0.45935-0.49730
   1  -5  -2    5.43    2.38   1-0.80905-0.87615-0.01111-0.23252-0.58762-0.42223
   1  -5  -2    4.82    1.80   1 0.02004-0.04474-0.48067-0.70240-0.87666-0.71036
   1   5  -2    3.34    2.00   1-0.54084-0.39572 0.03441 0.27658 0.84041 0.87573
   1   5  -2    3.75    1.48   1-0.66683-0.51886 0.13461 0.37514 0.73294 0.76814
  -1   5   2    5.29    2.37   1-0.79398-0.72650 0.40288 0.62358 0.45527 0.28866
  -1  -5   1   41.45    3.32   1-0.71363-0.82732 0.47218 0.22755-0.51746-0.51356
   1  -5  -1   42.13    3.25   1-0.79282-0.89191 0.20003-0.01816-0.57569-0.45184
   1  -5  -1   34.90    2.85   1 0.12649 0.02949-0.40655-0.62532-0.90482-0.77980
   1   5  -1   31.08    2.48   1-0.48642-0.37356 0.09675 0.34184 0.86834 0.86231
   1   5  -1   35.28    2.73   1-0.70870-0.59316 0.20328 0.44728 0.67558 0.66939
  -1   5   1   31.93    2.76   1-0.80157-0.70183 0.43591 0.65332 0.40922 0.28387
   1  -5   0   16.20    2.62   1-0.73863-0.86967 0.40901 0.19381-0.53584-0.45398
  -1  -5   0   17.68    2.76   1-0.77357-0.85534 0.29370 0.04585-0.56153-0.51602
   1  -5   0   16.03    2.25   1 0.22693 0.09772-0.32824-0.54413-0.91692-0.83328
   1   5   0   18.75    2.67   1-0.42122-0.34064 0.16560 0.41361 0.89170 0.84432
   1   5   0   16.28    2.18   1-0.72146-0.63817 0.22632 0.47361 0.65442 0.60698
  -1   5   0   18.35    2.56   1-0.80712-0.67522 0.47264 0.68665 0.35377 0.26938
   1  -5   1    2.88    1.92   1-0.65602-0.81887 0.58644 0.37432-0.47509-0.43511
  -1  -5  -1    3.74    1.85   1-0.80490-0.85480 0.10200-0.14891-0.58457-0.49711
  -1  -5  -1    2.47    2.45   1 0.33023 0.28237-0.23843-0.48967-0.91328-0.82491
   1  -5   1    2.46    2.73   1 0.31740 0.15596-0.25015-0.46315-0.91470-0.87244
   1   5   1    4.19    2.35   1-0.72412-0.67308 0.23129 0.48187 0.64973 0.56102
  -1   5  -1   -2.14    1.77   1-0.80905-0.64486 0.51456 0.72534 0.28400 0.24086
   1  -5   2   -0.75    2.02   1-0.56128-0.75598 0.72151 0.51257-0.40542-0.40712
  -1  -5  -2   -0.63    2.47   1-0.80652-0.82443-0.08003-0.33416-0.58576-0.45676
  -1  -5  -2    1.90    2.09   1 0.23438 0.21875-0.32209-0.57621-0.91723-0.78747
   1   5   2    1.35    1.98   1-0.72190-0.70312 0.22714 0.48100 0.65365 0.52369
  -1   5  -2    0.96    1.86   1-0.80326-0.60678 0.56530 0.77286 0.18759 0.18571
   1  -5   3   19.94    2.32   1-0.46764-0.69397 0.81733 0.61141-0.33656-0.38023
  -1  -5  -3   18.80    2.91   1-0.78651-0.77327-0.23513-0.49198-0.57105-0.39998
  -1  -5  -3   20.80    2.30   1 0.12426 0.14084-0.40819-0.66520-0.90439-0.73325
  -1   5  -3   18.37    3.01   1-0.47024-0.24380 0.11438 0.32100 0.87509 0.91516
   1   5   3   18.80    2.24   1-0.71673-0.73020 0.21764 0.47479 0.66251 0.49129
  -1   5  -3   15.51    1.94   1-0.77700-0.54824 0.62822 0.83254 0.04000 0.07938
   1  -5   4   -0.03    2.61   1-0.38095-0.63905 0.88342 0.68064-0.27282-0.35823
  -1  -5  -4    5.64    2.87   1-0.75552-0.71037-0.35859-0.61864-0.54826-0.33563
  -1  -5  -4   -0.32    1.78   1 0.00624 0.05506-0.48964-0.74967-0.87189-0.65951
  -1   5  -4    3.06    2.35   1-0.52809-0.26937 0.04947 0.25317 0.84774 0.92916
   1   5   4   -0.28    2.48   1-0.70949-0.75522 0.20467 0.46511 0.67433 0.46184
  -1   5  -4   -3.39    2.28   1-0.69444-0.43339 0.69300 0.89409-0.19361-0.11298
   1  -5   5    6.19    2.70   1-0.30314-0.59301 0.92823 0.72859-0.21560-0.34275
  -1  -5  -5    7.97    2.51   1-0.72226-0.64520-0.45162-0.71485-0.52380-0.26961
  -1  -5  -5    4.12    1.75   1-0.11146-0.03041-0.56013-0.82307-0.82086-0.56711
  -1   5  -5    6.93    1.99   1-0.57761-0.28661-0.01075 0.19002 0.81624 0.93901
   1   5   5    6.81    2.46   1-0.70063-0.77861 0.18927 0.45300 0.68795 0.43421
  -1   5  -5    3.00    1.51   1-0.51590-0.22256 0.70802 0.90588-0.48222-0.36032
   1  -5   6   10.34    2.29   1-0.23379-0.55543 0.95824 0.76175-0.16461-0.33349
  -1  -5  -6   15.66    2.53   1-0.69171-0.58274-0.51980-0.78621-0.50133-0.20559
  -1  -5  -6   11.28    2.06   1-0.21709-0.10379-0.61401-0.87987-0.75885-0.46372
  -1   5  -6   13.84    2.95   1-0.61997-0.29670-0.06661 0.13124 0.78178 0.94590
   1  -5   6   11.26    1.54   1 0.32419-0.00194-0.66955-0.86276 0.66828 0.50560
   1   5   6   14.83    2.33   1-0.69038-0.80062 0.17208 0.43909 0.70267 0.40767
   1  -5   7   51.96    3.72   1-0.17188-0.52519 0.97789 0.78447-0.11908-0.32980
  -1  -5  -7   48.91    3.62   1-0.66599-0.52512-0.56896-0.83856-0.48242-0.14512
  -1  -5  -7   42.48    2.78   1-0.30436-0.15875-0.65131-0.91991-0.69509-0.35853
  -1   5  -7   52.43    3.66   1-0.65623-0.30068-0.11853 0.07640 0.74518 0.95065
   1  -5   7   52.20    3.09   1 0.15184-0.20655-0.59364-0.78336 0.79027 0.58624
   1   5   7   51.44    3.82   1-0.67890-0.82139 0.15347 0.42377 0.71801 0.38175
   1  -5   8   30.91    3.26   1-0.11590-0.50097 0.99019 0.79992-0.07791-0.33038
  -1  -5  -8   39.86    3.80   1-0.64560-0.47282-0.60391-0.87669-0.46743-0.08856
  -1  -5  -8   22.66    2.34   1-0.36994-0.19205-0.67452-0.94605-0.63887-0.26096
  -1   5  -8   30.72    3.77   1-0.68725-0.29943-0.16694 0.02507 0.70696 0.95378
   1   5   8   33.28    3.12   1-0.66641-0.84073 0.13395 0.40783 0.73344 0.35614
   1  -5   9    1.45    2.82   1-0.06488-0.48171 0.99707 0.80993-0.04039-0.33460
  -1  -5  -9   -4.45    2.72   1-0.63026-0.42557-0.62824-0.90421-0.45615-0.03573
  -1  -5  -9   -0.68    1.61   1-0.41685-0.20669-0.68828-0.96272-0.59371-0.17445
  -1   5  -9    2.72    2.74   1-0.71375-0.29365-0.21225-0.02314 0.66746 0.95563
   1   5   9    1.84    2.34   1-0.65267-0.85922 0.11324 0.39045 0.74912 0.33057
   1  -5  10    1.41    3.84   1-0.01789-0.46648 0.99982 0.81581-0.00584-0.34180
  -1  -5 -10    0.96    3.04   1-0.61941-0.38282-0.64456-0.92372-0.44817 0.01380
  -1  -5 -10    3.21    1.99   1-0.44844-0.20602-0.69606-0.97341-0.56070-0.10010
  -1   5 -10   -2.47    2.57   1-0.73627-0.28390-0.25480-0.06861 0.62687 0.95639
   1   5  10   -4.13    3.14   1-0.63786-0.87663 0.09168 0.37223 0.76467 0.30487
   1  -5  11   -0.67    3.75   1 0.02578-0.45456 0.99932 0.81845 0.02627-0.35142
  -1  -5 -11    3.26    3.36   1-0.61243-0.34393-0.65470-0.93704-0.44304 0.06049
  -1   5 -11   -1.81    3.16   1-0.75526-0.27061-0.29492-0.11165 0.58532 0.95619
   1   5  11   -2.87    3.28   1-0.62198-0.89298 0.06938 0.35325 0.77995 0.27890
   1  -5  12    1.45    3.93   1 0.06675-0.44536 0.99617 0.81844 0.05639-0.36304
  -1  -5 -12   -2.24    3.64   1-0.60873-0.30832-0.65996-0.94549-0.44032 0.10477
  -1   5 -12   -2.32    2.68   1-0.77105-0.25413-0.33284-0.15249 0.54285 0.95507
   1   5  12    2.44    3.51   1-0.60502-0.90825 0.04637 0.33359 0.79485 0.25255
   1  -5  13    6.41    3.66   1 0.10546-0.43840 0.99079 0.81620 0.08486-0.37632
  -1  -5 -13    8.25    2.75   1-0.60780-0.27548-0.66128-0.94999-0.43963 0.14701
  -1   5 -13    3.56    4.05   1-0.78390-0.23470-0.36880-0.19137 0.49947 0.95304
   1   5  13    6.65    3.29   1-0.58698-0.92244 0.02272 0.31327 0.80928 0.22573
   1  -5  14   -1.78    3.31   1 0.14266-0.43387 0.98338 0.81273 0.11221-0.38887
  -1  -5 -14   -0.45    3.86   1-0.60919-0.24496-0.65931-0.95121-0.44066 0.18755
  -1   5 -14   -1.32    3.45   1-0.79400-0.21253-0.40297-0.22846 0.45515 0.95007
   1   5  14    0.72    3.59   1-0.56782-0.93551-0.00154 0.29234 0.82314 0.19834
   1  -5  15   19.93    4.91   1 0.17789-0.43049 0.97430 0.80684 0.13812-0.40456
  -1  -5 -15   12.58    4.57   1-0.61254-0.21640-0.65454-0.94963-0.44312 0.22664
  -1   5 -15   19.40    4.05   1-0.80148-0.18774-0.43548-0.26389 0.40983 0.94610
   1   5  15   10.12    4.12   1-0.54752-0.94744-0.02641 0.27080 0.83637 0.17031
   1  -5  16   -0.74    3.62   1 0.21178-0.42845 0.96361 0.79935 0.16305-0.42124
  -1  -5 -16    0.29    4.01   1-0.61754-0.18950-0.64730-0.94557-0.44680 0.26452
  -1   5 -16   -1.63    3.30   1-0.80642-0.16040-0.46646-0.29779 0.36344 0.94105
   1   5  16   -4.18    4.08   1-0.52603-0.95818-0.05188 0.24866 0.84887 0.14157
  -1  -7  16   -7.98    5.45   1 0.12038-0.51179 0.98808 0.69766 0.09583-0.50133
   1  -7 -16    1.97    3.91   1-0.68257-0.34653-0.53799-0.89565-0.49462 0.27875
   1   7 -16    1.52    4.49   1-0.80440-0.16538-0.45198-0.15801 0.38554 0.97348
  -1   7  16   10.74    6.00   1-0.58424-0.92456 0.01921 0.37879 0.81134 0.04112
  -1  -7  15   12.13    4.72   1 0.08086-0.51955 0.99448 0.70091 0.06677-0.48865
   1  -7 -15    0.86    3.35   1-0.68126-0.37713-0.54053-0.89501-0.49365 0.23816
   1   7 -15   15.89    4.89   1-0.79905-0.19231-0.42380-0.12691 0.42649 0.97309
  -1   7  15    6.18    3.68   1-0.60494-0.91303 0.04626 0.40251 0.79492 0.06595
  -1  -7  14    9.49    4.73   1 0.03974-0.52891 0.99854 0.70183 0.03653-0.47714
   1  -7 -14   -0.58    3.11   1-0.68171-0.40949-0.53965-0.89094-0.49399 0.19627
   1   7 -14   10.72    4.39   1-0.79174-0.21728-0.39465-0.09483 0.46624 0.97149
  -1   7  14    4.90    2.97   1-0.62449-0.90035 0.07285 0.42576 0.77762 0.08990
  -1  -7  13    9.86    4.37   1-0.00321-0.54011 0.99998 0.70014 0.00494-0.46699
   1  -7 -13    2.42    3.97   1-0.68418-0.44387-0.53484-0.88294-0.49580 0.15289
   1   7 -13   -3.26    3.34   1-0.78248-0.24029-0.36449-0.06176 0.50484 0.96873
  -1   7  13   -2.62    3.11   1-0.64293-0.88657 0.09898 0.44856 0.75949 0.11302
  -1  -7  12    6.71    3.73   1-0.04824-0.55338 0.99843 0.69546-0.02816-0.45836
   1  -7 -12    2.04    2.72   1-0.68894-0.48054-0.52539-0.87031-0.49930 0.10783
   1   7 -12    1.71    3.03   1-0.77123-0.26131-0.33331-0.02766 0.54231 0.96485
  -1   7  12    1.76    3.05   1-0.66032-0.87173 0.12468 0.47092 0.74055 0.13533
  -1  -7  11    9.91    2.88   1-0.09564-0.56902 0.99341 0.68730-0.06301-0.45147
   1  -7 -11    1.82    2.36   1-0.69626-0.51976-0.51040-0.85213-0.50468 0.06090
   1   7 -11    2.96    2.88   1-0.75795-0.28031-0.30104 0.00752 0.57868 0.95987
  -1   7  11   -0.76    2.60   1-0.67647-0.85623 0.14963 0.49219 0.72110 0.15685
  -1  -7  10    3.97    3.23   1-0.14570-0.58732 0.98427 0.67502-0.09982-0.44653
   1  -7 -10   -1.16    2.75   1-0.70636-0.56177-0.48865-0.82720-0.51211 0.01191
   1  -7 -10   -2.15    2.18   1-0.26460-0.11318-0.63517-0.97278-0.72563-0.20219
   1   7 -10   -1.74    2.77   1-0.74258-0.29721-0.26762 0.04386 0.61395 0.95380
  -1   7  10   -2.55    2.52   1-0.69183-0.83933 0.17447 0.51375 0.70065 0.17767
  -1  -7   9    7.00    3.58   1-0.19858-0.60861 0.97021 0.65789-0.13872-0.44357
   1  -7  -9    1.75    2.47   1-0.71939-0.60671-0.45859-0.79395-0.52169-0.03922
   1  -7  -9    2.20    2.33   1-0.23523-0.11622-0.62233-0.95733-0.74657-0.26458
   1   7  -9    1.43    2.74   1-0.72502-0.31193-0.23299 0.08141 0.64811 0.94660
  -1   7   9    1.71    2.57   1-0.70620-0.82145 0.19889 0.53488 0.67949 0.19776
  -1  -7   8   23.66    3.14   1-0.25486-0.63312 0.95005 0.63459-0.18010-0.44321
   1  -7  -8   21.77    3.18   1-0.73526-0.65449-0.41822-0.75039-0.53336-0.09245
   1  -7  -8   20.88    2.40   1-0.19836-0.11160-0.60513-0.93722-0.77101-0.33039
   1   7  -8   27.95    2.84   1-0.70515-0.32433-0.19706 0.12026 0.68112 0.93826
  -1   7   8   26.60    3.01   1-0.71959-0.80259 0.22288 0.55558 0.65764 0.21717
  -1  -7   7   -0.80    2.16   1-0.31459-0.66108 0.92241 0.60380-0.22402-0.44540
   1  -7  -7    3.11    2.36   1-0.75348-0.70462-0.36511-0.69410-0.54676-0.14741
   1  -7  -7    1.40    2.38   1-0.15305-0.09852-0.58243-0.91160-0.79834-0.39909
   1   7  -7    4.94    2.57   1-0.68281-0.33427-0.15974 0.16050 0.71291 0.92870
  -1   7   7    5.38    2.86   1-0.73203-0.78277 0.24643 0.57585 0.63513 0.23592
  -1  -7   6    3.73    2.24   1-0.37778-0.69250 0.88549 0.56375-0.27049-0.45013
   1  -7  -6    1.29    2.69   1-0.77287-0.75591-0.29652-0.62232-0.56101-0.20322
   1  -7  -6    1.76    2.10   1-0.09972-0.07744-0.55358-0.87983-0.82679-0.46892
   1   7  -6    4.30    2.12   1-0.65782-0.34155-0.12092 0.20224 0.74339 0.91784
  -1   7   6    2.88    3.11   1-0.74350-0.76199 0.26953 0.59566 0.61199 0.25404
  -1  -7   5    0.62    2.76   1-0.44408-0.72702 0.83717 0.51229-0.31924-0.45715
   1  -7  -5    0.06    2.32   1-0.79117-0.80612-0.20980-0.53241-0.57447-0.25824
   1  -7  -5    3.27    2.04   1-0.03947-0.04943-0.51830-0.84163-0.85428-0.53778
   1   7  -5    1.64    3.16   1-0.62996-0.34597-0.08049 0.24558 0.77243 0.90553
  -1   7   5    1.86    2.52   1-0.75403-0.74026 0.29217 0.61501 0.58827 0.27158
  -1  -7   4    9.78    2.73   1-0.51213-0.76368 0.77546 0.44765-0.36928-0.46517
   1  -7  -4    3.47    2.39   1-0.80469-0.85041-0.10450-0.42487-0.58442-0.31029
   1  -7  -4    5.63    2.03   1 0.02597-0.01621-0.47678-0.79719-0.87863-0.60350
   1   7  -4    5.90    2.42   1-0.59897-0.34725-0.03835 0.29064 0.79984 0.89159
  -1   7   4    7.79    3.18   1-0.76360-0.71758 0.31431 0.63387 0.56401 0.28857
  -1  -7   3    1.47    2.69   1-0.58096-0.80066 0.69725 0.36626-0.41989-0.47411
   1  -7  -3    4.93    2.54   1-0.80893-0.88663 0.02071-0.29643-0.58753-0.35495
   1  -7  -3    0.45    2.13   1 0.09397 0.01957-0.43013-0.74752-0.89785-0.66394
   1   7  -3    5.87    2.96   1-0.56455-0.34511 0.00560 0.33752 0.82537 0.87577
   1   7  -3   -1.40    1.23   1-0.60203-0.37869 0.04240 0.37184 0.79734 0.84754
  -1   7   3    3.40    1.88   1-0.77222-0.69395 0.33590 0.65217 0.53928 0.30511
  -1  -7   2    3.02    2.44   1-0.64708-0.83494 0.60147 0.26728-0.46852-0.48106
   1  -7  -2    2.24    2.54   1-0.79867-0.90837 0.16039-0.15354-0.57999-0.38895
   1  -7  -2    2.87    2.49   1 0.16335 0.05673-0.37878-0.69329-0.91095-0.71841
   1   7  -2    3.53    1.97   1-0.52639-0.33922 0.05146 0.38630 0.84868 0.85772
   1   7  -2    2.33    1.73   1-0.67451-0.48339 0.14654 0.47931 0.72356 0.73251
  -1   7   2    3.05    2.28   1-0.77988-0.66935 0.35689 0.66987 0.51419 0.32128
  -1  -7   1   11.04    2.78   1-0.70632-0.86257 0.48875 0.15152-0.51208-0.48271
   1  -7  -1    7.17    2.40   1-0.77030-0.91198 0.30660-0.00443-0.55913-0.41019
   1  -7  -1   10.78    2.70   1 0.23142 0.09256-0.32455-0.63617-0.91711-0.76597
   1   7  -1   14.63    2.55   1-0.48416-0.32927 0.09924 0.43699 0.86932 0.83702
   1   7  -1    8.69    2.09   1-0.70099-0.54240 0.18990 0.52619 0.68741 0.65491
  -1   7   1    7.97    2.53   1-0.78657-0.64379 0.37716 0.68686 0.48891 0.33726
   1  -7   0   38.03    2.95   1-0.72418-0.89779 0.44687 0.13905-0.52521-0.41789
  -1  -7   0   41.99    3.40   1-0.75454-0.87888 0.36172 0.02127-0.54754-0.47656
   1  -7   0   40.55    3.12   1 0.29653 0.12546-0.26884-0.57758-0.91639-0.80663
   1   7   0   41.22    3.00   1-0.43759-0.31497 0.14885 0.48953 0.88676 0.81311
   1   7   0   38.45    3.33   1-0.71204-0.58570 0.20919 0.54877 0.67024 0.59649
  -1   7   0   32.90    2.86   1-0.79228-0.61724 0.39657 0.70298 0.46370 0.35330
   1  -7   1   19.30    2.70   1-0.66384-0.86922 0.57279 0.26802-0.48084-0.41546
  -1  -7  -1   17.03    2.87   1-0.78814-0.88064 0.22663-0.11682-0.57224-0.45915
  -1  -7  -1   16.01    2.91   1 0.37427 0.28459-0.19693-0.54084-0.90616-0.79151
   1  -7   1   18.10    2.68   1 0.35711 0.15384-0.21334-0.51903-0.90936-0.84079
   1   7   1   15.18    2.61   1-0.71561-0.62152 0.21561 0.55847 0.66438 0.54937
  -1   7  -1   13.03    2.32   1-0.79698-0.58969 0.41482 0.71795 0.43900 0.36986
   1  -7   2    0.41    2.05   1-0.59483-0.83205 0.67910 0.37752-0.43009-0.40638
  -1  -7  -2    2.58    2.33   1-0.80563-0.86614 0.09272-0.25394-0.58511-0.43047
  -1  -7  -2    0.52    2.72   1 0.31727 0.25978-0.25026-0.59723-0.91471-0.75883
  -1   7  -2    1.79    2.60   1-0.42108-0.18487 0.16574 0.46796 0.89174 0.86419
   1   7   2    2.04    2.36   1-0.71489-0.65306 0.21431 0.56046 0.66557 0.50930
  -1   7  -2    2.33    1.94   1-0.80067-0.56112 0.43142 0.73126 0.41568 0.38780
   1  -7   3    4.11    2.37   1-0.52245-0.79152 0.76485 0.46646-0.37687-0.39484
  -1  -7  -3   -3.99    2.30   1-0.80868-0.83720-0.03231-0.38219-0.58735-0.39117
  -1  -7  -3   -0.80    2.05   1 0.25549 0.23021-0.30441-0.65426-0.91763-0.72037
  -1   7  -3   -1.82    2.39   1-0.47188-0.20340 0.11261 0.41190 0.87443 0.88823
   1   7   3   -1.20    1.93   1-0.71134-0.68175 0.20793 0.55737 0.67138 0.47385
  -1   7  -3   -2.35    1.48   1-0.80329-0.53148 0.44526 0.74181 0.39555 0.40893
   1  -7   4    2.73    3.13   1-0.45097-0.75159 0.83152 0.53609-0.32431-0.38433
  -1  -7  -4   -0.15    2.68   1-0.80094-0.79862-0.14199-0.49436-0.58166-0.34322
  -1  -7  -4    0.54    1.83   1 0.19052 0.19747-0.35761-0.71034-0.91422-0.67558
  -1   7  -4   -0.78    2.49   1-0.51809-0.21732 0.06108 0.35746 0.85314 0.90828
   1   7   4   -1.24    1.98   1-0.70569-0.70836 0.19799 0.55072 0.68029 0.44150
  -1   7  -4   -0.61    1.44   1-0.80476-0.50069 0.45436 0.74770 0.38196 0.43615
   1  -7   5    2.90    2.66   1-0.38211-0.71450 0.88265 0.59036-0.27368-0.37543
  -1  -7  -5    3.19    2.33   1-0.78641-0.75218-0.23566-0.59121-0.57097-0.29098
  -1  -7  -5    3.30    1.86   1 0.12419 0.16337-0.40824-0.76386-0.90438-0.62435
  -1   7  -5    7.44    2.65   1-0.55987-0.22683 0.01138 0.30483 0.82849 0.92499
   1   7   5    5.56    2.11   1-0.69836-0.73329 0.18542 0.54143 0.69130 0.41125
   1  -7   6   10.94    3.20   1-0.31717-0.68133 0.92106 0.63191-0.22592-0.36941
  -1  -7  -6   14.21    2.65   1-0.76880-0.70266-0.31232-0.67107-0.55802-0.23647
  -1  -7  -6    8.16    2.08   1 0.05895 0.13036-0.45460-0.81311-0.88873-0.56732
  -1   7  -6   10.35    2.54   1-0.59750-0.23218-0.03641 0.25412 0.80104 0.93888
   1   7   6   16.34    2.82   1-0.68961-0.75679 0.17080 0.53009 0.70375 0.38244
   1  -7   7    1.99    2.62   1-0.25643-0.65236 0.94941 0.66340-0.18125-0.36649
  -1  -7  -7    3.44    3.07   1-0.75078-0.65274-0.37354-0.73547-0.54477-0.18167
  -1  -7  -7    4.31    2.04   1-0.00120 0.10244-0.49442-0.85605-0.86921-0.50663
  -1   7  -7    4.28    3.09   1-0.63125-0.23366-0.08230 0.20531 0.77119 0.95039
   1   7   7   -1.59    3.03   1-0.67957-0.77900 0.15454 0.51712 0.71714 0.35457
   1  -7   8    9.41    3.27   1-0.19975-0.62744 0.96985 0.68698-0.13957-0.36654
  -1  -7  -8    7.44    3.20   1-0.73404-0.60409-0.42147-0.78659-0.53247-0.12780
  -1  -7  -8    2.60    1.92   1-0.05604 0.07985-0.52828-0.89282-0.84721-0.44326
  -1   7  -8   15.53    3.59   1-0.66141-0.23155-0.12634 0.15836 0.73929 0.95984
   1   7   8    6.79    2.56   1-0.66851-0.79969 0.13719 0.50330 0.73093 0.32738
   1  -7   9    8.26    3.35   1-0.14691-0.60624 0.98400 0.70419-0.10072-0.36955
  -1  -7  -9    8.33    3.33   1-0.71950-0.55764-0.45833-0.82663-0.52177-0.07554
  -1   7  -9    2.15    3.53   1-0.68826-0.22612-0.16858 0.11319 0.70560 0.96749
   1   7   9    5.32    3.20   1-0.65616-0.81957 0.11843 0.48788 0.74526 0.30046
   1  -7  10   14.00    3.01   1-0.09724-0.58833 0.99318 0.71651-0.06419-0.37478
  -1  -7 -10   15.57    4.00   1-0.70752-0.51375-0.48607-0.85756-0.51296-0.02518
  -1   7 -10    6.57    3.08   1-0.71201-0.21760-0.20913 0.06972 0.67029 0.97354
   1   7  10    5.74    2.88   1-0.64272-0.83835 0.09867 0.47145 0.75971 0.27366
   1  -7  11    5.24    2.46   1-0.05048-0.57333 0.99827 0.72474-0.02981-0.38214
  -1  -7 -11    0.95    3.09   1-0.69819-0.47251-0.50634-0.88101-0.50610 0.02323
  -1   7 -11    2.95    3.36   1-0.73287-0.20618-0.24808 0.02785 0.63352 0.97811
   1   7  11    2.28    3.51   1-0.62819-0.85605 0.07801 0.45413 0.77413 0.24682
   1  -7  12   -1.58    3.81   1-0.00624-0.56085 0.99997 0.72957 0.00272-0.39135
  -1  -7 -12    2.14    3.31   1-0.69140-0.43381-0.52043-0.89829-0.50111 0.06979
  -1   7 -12    4.91    3.89   1-0.75101-0.19205-0.28552-0.01249 0.59535 0.98130
   1   7  12    1.07    4.05   1-0.61259-0.87268 0.05655 0.43600 0.78837 0.21981
   1  -7  13    6.78    3.95   1 0.03580-0.55056 0.99879 0.73153 0.03364-0.40217
  -1  -7 -13    1.04    4.66   1-0.68695-0.39746-0.52938-0.91043-0.49783 0.11462
  -1   7 -13   -1.22    2.86   1-0.76656-0.17533-0.32152-0.05142 0.55587 0.98316
   1   7  13    0.72    3.38   1-0.59591-0.88823 0.03433 0.41711 0.80231 0.19251
   1  -7  14   -0.85    3.23   1 0.07596-0.54216 0.99510 0.73098 0.06317-0.41438
  -1  -7 -14    1.82    3.26   1-0.68462-0.36322-0.53399-0.91822-0.49612 0.15789
  -1   7 -14    6.58    3.14   1-0.77963-0.15612-0.35617-0.08898 0.51507 0.98372
   1   7  14    1.52    3.55   1-0.57812-0.90267 0.01140 0.39752 0.81587 0.16481
   1  -7  15    6.06    3.40   1 0.11447-0.53541 0.98920 0.72821 0.09149-0.42781
  -1  -7 -15    3.64    5.16   1-0.68417-0.33086-0.53487-0.92228-0.49579 0.19977
  -1   7 -15    6.63    3.73   1-0.79029-0.13450-0.38953-0.12526 0.47296 0.98296
   1   7  15    0.39    3.16   1-0.55920-0.91597-0.01221 0.37724 0.82894 0.13663
   1  -7  16   -4.57    4.13   1 0.15179-0.53079 0.98123 0.72428 0.11893-0.44006
  -1  -7 -16   -1.79    4.99   1-0.68539-0.30017-0.53247-0.92308-0.49669 0.24044
  -1   7 -16   -1.44    4.62   1-0.79857-0.11051-0.42165-0.16030 0.42951 0.98086
   1   7  16   -3.32    4.48   1-0.53911-0.92812-0.03648 0.35630 0.84144 0.10788
  -1  -9  15   -0.37    3.17   1 0.03098-0.61194 0.99906 0.61283 0.03009-0.49996
   1  -9 -15    0.41    4.38   1-0.74092-0.47962-0.40261-0.84942-0.53752 0.22010
   1   9 -15    9.38    5.32   1-0.79105-0.14227-0.39217-0.00261 0.46950 0.98982
  -1   9  15   -0.67    3.83   1-0.60391-0.86886 0.04490 0.49338 0.79578 0.04055
  -1  -9  14   -0.21    3.23   1-0.01146-0.62262 0.99993 0.61056-0.00112-0.48943
   1  -9 -14   -3.38    4.03   1-0.74331-0.51392-0.39580-0.83942-0.53928 0.17678
   1   9 -14    6.14    4.59   1-0.78194-0.16544-0.36291 0.02957 0.50680 0.98577
  -1   9  14   -2.38    4.12   1-0.62211-0.85483 0.06956 0.51470 0.77983 0.06585
  -1  -9  13   -0.02    3.14   1-0.05546-0.63486 0.99789 0.60539-0.03347-0.48004
   1  -9 -13    4.10    3.21   1-0.74722-0.54973-0.38435-0.82478-0.54215 0.13235
   1   9 -13    6.03    3.94   1-0.77107-0.18684-0.33291 0.06249 0.54277 0.98040
  -1   9  13   -2.63    4.52   1-0.63921-0.83970 0.09362 0.53543 0.76331 0.09058
  -1  -9  12    2.80    4.41   1-0.10116-0.64880 0.99260 0.59696-0.06707-0.47190
   1  -9 -12   -1.06    2.53   1-0.75270-0.58712-0.36758-0.80483-0.54618 0.08676
   1   9 -12    0.11    3.52   1-0.75845-0.20649-0.30217 0.09614 0.57744 0.97371
  -1   9  12    8.89    4.19   1-0.65525-0.82351 0.11707 0.55555 0.74628 0.11480
  -1  -9  11   -0.52    3.33   1-0.14869-0.66457 0.98360 0.58482-0.10202-0.46510
   1  -9 -11    4.44    3.60   1-0.75973-0.62606-0.34467-0.77873-0.55136 0.04003
   1   9 -11    2.56    3.80   1-0.74407-0.22439-0.27071 0.13053 0.61079 0.96571
  -1   9  11    8.02    4.09   1-0.67026-0.80629 0.13990 0.57504 0.72881 0.13859
  -1  -9  10    8.18    3.89   1-0.19802-0.68234 0.97038 0.56855-0.13830-0.45951
   1  -9 -10   -0.50    2.89   1-0.76818-0.66642-0.31465-0.74553-0.55757-0.00773
   1   9 -10    0.08    4.61   1-0.72792-0.24052-0.23850 0.16565 0.64283 0.95640
  -1   9  10    1.74    2.74   1-0.68406-0.78850 0.16175 0.59331 0.71126 0.16197
  -1  -9   9   -1.31    3.97   1-0.24954-0.70208 0.95220 0.54722-0.17618-0.45565
   1  -9  -9    2.02    3.57   1-0.77771-0.70786-0.27641-0.70409-0.56458-0.05630
   1  -9  -9   -0.67    2.12   1-0.01840 0.05872-0.50529-0.93314-0.86275-0.35467
   1   9  -9    0.78    2.85   1-0.71000-0.25487-0.20557 0.20151 0.67352 0.94574
  -1   9   9   -3.62    2.94   1-0.69707-0.76926 0.18323 0.61150 0.69319 0.18515
  -1  -9   8   -3.32    3.23   1-0.30309-0.72386 0.92826 0.52014-0.21556-0.45329
   1  -9  -8    1.89    2.69   1-0.78774-0.74980-0.22873-0.65323-0.57195-0.10524
   1  -9  -8   -4.24    2.47   1 0.01037 0.05525-0.48697-0.91191-0.87335-0.40664
   1   9  -8    5.49    2.86   1-0.69027-0.26741-0.17190 0.23809 0.70282 0.93370
  -1   9   8    2.14    3.25   1-0.70910-0.74904 0.20397 0.62896 0.67495 0.20818
  -1  -9   7    6.92    3.36   1-0.35855-0.74755 0.89762 0.48636-0.25635-0.45234
   1  -9  -7    6.07    2.81   1-0.79731-0.79127-0.17047-0.59178-0.57899-0.15383
   1  -9  -7   -0.01    2.43   1 0.04434 0.05699-0.46453-0.88655-0.88444-0.45910
   1   9  -7   11.51    3.52   1-0.66871-0.27813-0.13750 0.27541 0.73068 0.92021
  -1   9   7    9.85    3.71   1-0.72015-0.72784 0.22390 0.64560 0.65669 0.23117
  -1  -9   6    4.83    3.08   1-0.41563-0.77286 0.85921 0.44481-0.29832-0.45257
   1  -9  -6    7.06    3.14   1-0.80491-0.82924-0.10187-0.52120-0.58458-0.20173
   1  -9  -6    1.30    2.23   1 0.08207 0.06248-0.43856-0.85745-0.89494-0.51074
   1   9  -6    6.86    2.99   1-0.64529-0.28698-0.10241 0.31342 0.75703 0.90520
  -1   9   6    2.56    2.35   1-0.73022-0.70565 0.24293 0.66134 0.63855 0.25429
  -1  -9   5   -2.68    2.36   1-0.47374-0.79920 0.81194 0.39439-0.34105-0.45357
   1  -9  -5    6.57    2.88   1-0.80893-0.86525-0.02057-0.43669-0.58753-0.24623
   1  -9  -5    0.90    2.51   1 0.12419 0.07238-0.40824-0.82425-0.90438-0.56157
   1   9  -5    3.20    3.70   1-0.61999-0.29395-0.06664 0.35211 0.78177 0.88859
  -1   9   5   -6.69    3.31   1-0.73931-0.68249 0.26093 0.67606 0.62074 0.27774
  -1  -9   4    7.09    3.47   1-0.53162-0.82570 0.75512 0.33467-0.38361-0.45409
   1  -9  -4    9.90    3.13   1-0.80702-0.89533 0.07178-0.34111-0.58613-0.28637
   1  -9  -4    7.45    2.69   1 0.16892 0.08488-0.37450-0.78762-0.91171-0.61028
   1   9  -4    8.03    3.13   1-0.59278-0.29902-0.03024 0.39143 0.80479 0.87026
  -1   9   4    8.63    2.40   1-0.74740-0.65833 0.27774 0.68958 0.60352 0.30178
  -1  -9   3    3.08    2.45   1-0.58866-0.85090 0.68728 0.26364-0.42556-0.45436
   1  -9  -3    8.89    2.92   1-0.79693-0.91723 0.17314-0.23655-0.57871-0.32049
   1  -9  -3    4.12    2.66   1 0.21524 0.09898-0.33780-0.74803-0.91627-0.65623
   1   9  -3    3.90    3.49   1-0.56366-0.30218 0.00670 0.43129 0.82597 0.85009
   1   9  -3    1.21    1.60   1-0.59745-0.33096 0.03636 0.45803 0.80107 0.82502
  -1   9   3    2.65    2.49   1-0.75446-0.63313 0.29313 0.70168 0.58724 0.32676
  -1  -9   2   38.69    3.13   1-0.64268-0.87307 0.60866 0.18183-0.46528-0.45241
   1  -9  -2   38.05    3.33   1-0.77670-0.92903 0.28072-0.12614-0.56384-0.34782
   1  -9  -2   34.68    3.36   1 0.26220 0.11371-0.29870-0.70606-0.91761-0.69896
   1   9  -2   42.57    4.21   1-0.53267-0.30346 0.04410 0.47161 0.84516 0.82794
   1   9  -2   32.76    2.75   1-0.65225-0.41799 0.11261 0.53762 0.74958 0.73228
  -1   9   2   33.83    3.39   1-0.76043-0.60684 0.30677 0.71204 0.57239 0.35317
  -1  -9   1   39.28    2.97   1-0.69147-0.89029 0.52028 0.09043-0.50116-0.44632
   1  -9  -1   41.78    3.27   1-0.74592-0.93017 0.38818-0.01546-0.54120-0.36679
   1  -9  -1   36.28    3.27   1 0.30891 0.12819-0.25781-0.66228-0.91548-0.73820
   1   9  -1   39.75    3.69   1-0.49988-0.30294 0.08179 0.51222 0.86222 0.80364
   1   9  -1   37.00    3.06   1-0.67790-0.47625 0.15189 0.58046 0.71928 0.66048
  -1   9   1   43.40    3.64   1-0.76520-0.57936 0.31818 0.72016 0.55965 0.38169
   1  -9   0   55.35    3.30   1-0.70500-0.92117 0.49166 0.09123-0.51111-0.37831
  -1  -9   0   49.81    3.99   1-0.73327-0.90016 0.42355-0.00951-0.53189-0.43544
   1  -9   0   55.12    3.53   1 0.35411 0.14123-0.21619-0.61754-0.90987-0.77375
   1   9   0   54.33    3.77   1-0.46540-0.30074 0.11958 0.55293 0.87698 0.77705
   1   9   0   58.52    3.54   1-0.69088-0.52148 0.17290 0.60476 0.70198 0.60192
  -1   9   0   52.84    3.42   1-0.76860-0.55051 0.32661 0.72530 0.55006 0.41335
   1  -9   1   36.00    3.36   1-0.65572-0.90363 0.58695 0.18953-0.47487-0.38408
  -1  -9  -1   39.81    3.35   1-0.76621-0.90119 0.32192-0.11436-0.55612-0.41806
   1   9   1   43.67    3.90   1-0.42947-0.29708 0.15720 0.59347 0.88929 0.74801
   1   9   1   34.70    3.13   1-0.69677-0.55962 0.18272 0.61787 0.69362 0.55230
  -1   9  -1   33.85    2.97   1-0.77025-0.51991 0.33081 0.72621 0.54521 0.44977
   1  -9   2  129.01    5.66   1-0.60048-0.88023 0.67144 0.27721-0.43425-0.38513
  -1  -9  -2  127.07    5.26   1-0.78959-0.89270 0.21873-0.22047-0.57331-0.39303
  -1  -9  -2  144.33    5.91   1 0.37929 0.28000-0.19206-0.63164-0.90512-0.72292
  -1   9  -2  138.09    5.54   1-0.44864-0.17038 0.13735 0.53223 0.88309 0.82927
   1   9   2  129.00    5.04   1-0.69824-0.59335 0.18522 0.62365 0.69147 0.50890
  -1   9  -2  124.38    5.07   1-0.76937-0.48677 0.32854 0.72066 0.54783 0.49364
   1  -9   3   15.32    3.56   1-0.54176-0.85337 0.74400 0.35296-0.39107-0.38363
  -1  -9  -3   13.03    2.93   1-0.80336-0.87448 0.11913-0.32328-0.58344-0.36161
  -1  -9  -3   13.59    2.92   1 0.34044 0.27330-0.22900-0.67170-0.91195-0.68856
  -1   9  -3   14.08    3.10   1-0.48799-0.17746 0.09502 0.48699 0.86765 0.85518
   1   9   3   11.38    2.42   1-0.69668-0.62404 0.18257 0.62428 0.69376 0.46992
  -1   9  -3    8.84    2.22   1-0.76399-0.44913 0.31524 0.70408 0.56296 0.55004
   1  -9   4   21.13    2.55   1-0.48203-0.82516 0.80444 0.41635-0.34714-0.38178
  -1  -9  -4   19.50    2.57   1-0.80882-0.84795 0.02618-0.41944-0.58746-0.32409
  -1  -9  -4   21.49    3.01   1 0.30075 0.26584-0.26510-0.71069-0.91611-0.65134
  -1   9  -4   24.36    2.91   1-0.52508-0.18227 0.05299 0.44204 0.84940 0.87827
   1   9   4   16.62    3.68   1-0.69283-0.65245 0.17613 0.62113 0.69925 0.43416
   1  -9   5   46.50    3.46   1-0.42240-0.79730 0.85415 0.46920-0.30330-0.37967
  -1  -9  -5   49.52    3.56   1-0.80776-0.81490-0.05765-0.50649-0.58667-0.28176
  -1  -9  -5   53.44    3.49   1 0.26155 0.25887-0.29925-0.74772-0.91762-0.61146
  -1   9  -5   53.96    3.44   1-0.55980-0.18472 0.01146 0.39760 0.82854 0.89877
   1   9   5   58.25    3.95   1-0.68715-0.67903 0.16677 0.61507 0.70710 0.40075
   1  -9   6    3.58    2.42   1-0.36414-0.77081 0.89418 0.51236-0.26046-0.37856
  -1  -9  -6    3.17    2.45   1-0.80224-0.77894-0.13022-0.58129-0.58261-0.23526
  -1  -9  -6    2.35    2.42   1 0.22380 0.25334-0.33081-0.78217-0.91677-0.56922
  -1   9  -6    1.69    3.49   1-0.59213-0.18477-0.02939 0.35381 0.80530 0.91688
   1   9   6   -0.49    3.00   1-0.67993-0.70406 0.15512 0.60670 0.71667 0.36906
   1  -9   7   18.57    3.45   1-0.30787-0.74632 0.92585 0.54719-0.21908-0.37892
  -1  -9  -7   12.79    3.79   1-0.79394-0.73872-0.19311-0.64736-0.57651-0.18759
  -1  -9  -7   10.77    2.46   1 0.18858 0.25035-0.35914-0.81338-0.91403-0.52510
  -1   9  -7   16.41    4.00   1-0.62206-0.18243-0.06949 0.31080 0.77987 0.93280
   1   9   7    9.23    3.75   1-0.67152-0.72732 0.14186 0.59687 0.72727 0.33871
   1  -9   8   37.98    4.78   1-0.25388-0.72410 0.95045 0.57493-0.17938-0.38096
  -1  -9  -8   39.56    4.25   1-0.78439-0.69727-0.24574-0.70318-0.56949-0.13902
  -1   9  -8   28.51    3.26   1-0.64963-0.17772-0.10874 0.26862 0.75243 0.94670
   1   9   8   32.30    4.03   1-0.66168-0.74971 0.12673 0.58509 0.73899 0.30918
   1  -9   9    1.58    3.01   1-0.20224-0.70423 0.96907 0.59668-0.14141-0.38473
  -1  -9  -9   -2.31    2.91   1-0.77473-0.65570-0.28895-0.74958-0.56239-0.09036
  -1   9  -9    2.68    3.60   1-0.67488-0.17070-0.14711 0.22734 0.72311 0.95873
   1   9   9    0.68    2.84   1-0.65066-0.77092 0.11026 0.57195 0.75131 0.28026
   1  -9  10    1.42    2.51   1-0.15304-0.68663 0.98260 0.61326-0.10522-0.39043
  -1  -9 -10   -1.76    3.79   1-0.76571-0.61477-0.32375-0.78757-0.55575-0.04216
  -1   9 -10   -1.88    2.98   1-0.69786-0.16141-0.18457 0.18696 0.69204 0.96901
   1   9  10    0.04    3.35   1-0.63851-0.79100 0.09261 0.55763 0.76401 0.25171
   1  -9  11    3.78    4.22   1-0.10586-0.67121 0.99187 0.62567-0.07053-0.39749
  -1  -9 -11   -1.34    3.36   1-0.75779-0.57494-0.35116-0.81817-0.54993 0.00521
  -1   9 -11    4.93    3.26   1-0.71862-0.14990-0.22109 0.14752 0.65930 0.97763
   1   9  11    0.57    3.46   1-0.62525-0.80997 0.07391 0.54226 0.77691 0.22335
   1  -9  12    1.77    4.47   1-0.06068-0.65779 0.99745 0.63439-0.03731-0.40601
  -1  -9 -12   -2.95    3.96   1-0.75124-0.53648-0.37213-0.84232-0.54511 0.05159
  -1   9 -12    0.16    3.45   1-0.73721-0.13621-0.25669 0.10900 0.62498 0.98466
   1   9  12    1.40    3.35   1-0.61090-0.82784 0.05426 0.52595 0.78984 0.19503
   1  -9  13    0.03    3.95   1-0.01732-0.64619 0.99983 0.63990-0.00542-0.41587
  -1  -9 -13    5.04    4.99   1-0.74615-0.49949-0.38750-0.86088-0.54137 0.09688
  -1   9 -13    6.06    3.86   1-0.75367-0.12039-0.29137 0.07140 0.58913 0.99015
   1   9  13    2.48    3.96   1-0.59545-0.84463 0.03373 0.50875 0.80268 0.16662
   1  -9  14   -0.15    4.46   1 0.02439-0.63623 0.99938 0.64259 0.02525-0.42693
  -1  -9 -14   -1.12    3.35   1-0.74255-0.46398-0.39797-0.87453-0.53872 0.14109
  -1   9 -14    1.17    4.16   1-0.76801-0.10246-0.32513 0.03473 0.55175 0.99413
   1   9  14    4.75    3.54   1-0.57889-0.86030 0.01238 0.49074 0.81530 0.13799
   1  -9  15   21.44    5.39   1 0.06463-0.62775 0.99640 0.64274 0.05484-0.43909
  -1  -9 -15   10.17    5.02   1-0.74038-0.42990-0.40412-0.88387-0.53713 0.18425
  -1   9 -15   10.10    4.39   1-0.78026-0.08243-0.35798-0.00103 0.51287 0.99659
   1   9  15   -1.44    4.99   1-0.56121-0.87484-0.00973 0.47195 0.82761 0.10905
  -1 -11  13   -2.32    3.59   1-0.09181-0.71372 0.99395 0.50877-0.06020-0.48140
   1 -11 -13    0.62    4.73   1-0.78733-0.63268-0.23088-0.76364-0.57165 0.12865
   1  11 -13   -2.68    5.47   1-0.76367-0.13740-0.31447 0.17360 0.56383 0.97518
  -1  11  13    4.32    4.64   1-0.62903-0.78638 0.07919 0.61324 0.77333 0.07435
  -1 -11  12    5.86    3.23   1-0.13689-0.72703 0.98617 0.49786-0.09335-0.47280
   1 -11 -12    3.16    4.43   1-0.79125-0.66850-0.20934-0.73892-0.57453 0.08421
   1  11 -12    7.15    5.00   1-0.75077-0.15677-0.28499 0.20600 0.59591 0.96591
  -1  11  12   -3.21    3.30   1-0.64395-0.76907 0.10045 0.63117 0.75844 0.10071
  -1 -11  11   -5.12    4.08   1-0.18311-0.74171 0.97481 0.48346-0.12734-0.46489
   1 -11 -11   -2.90    3.57   1-0.79566-0.70482-0.18189-0.70828-0.57778 0.03941
   1  11 -11    0.52    3.36   1-0.73642-0.17470-0.25511 0.23880 0.62657 0.95522
  -1  11  11   -5.38    3.78   1-0.65783-0.75072 0.12092 0.64831 0.74339 0.12691
  -1 -11  10   -2.11    3.63   1-0.23076-0.75759 0.95936 0.46487-0.16237-0.45819
   1 -11 -10   -1.73    2.74   1-0.80024-0.74131-0.14793-0.67113-0.58114-0.00550
   1  11 -10    2.22    4.88   1-0.72066-0.19121-0.22484 0.27199 0.65581 0.94311
  -1  11  10    3.91    3.70   1-0.67068-0.73134 0.14055 0.66460 0.72830 0.15307
  -1 -11   9    3.01    4.66   1-0.27965-0.77471 0.93939 0.44176-0.19832-0.45240
   1 -11  -9   -0.17    3.55   1-0.80439-0.77535-0.10794-0.62945-0.58420-0.05108
   1  11  -9   -0.39    3.64   1-0.70352-0.20635-0.19424 0.30551 0.68361 0.92956
  -1  11   9   -1.72    3.14   1-0.68231-0.71145 0.15893 0.67949 0.71357 0.17923
  -1 -11   8   -0.65    3.76   1-0.32964-0.79293 0.91436 0.41359-0.23509-0.44743
   1 -11  -8   -2.10    2.99   1-0.80767-0.81062-0.05950-0.57779-0.58661-0.09503
   1 -11  -8   -0.48    2.54   1 0.16944 0.17244-0.37409-0.89160-0.91177-0.41868
   1  11  -8    0.77    3.80   1-0.68505-0.22015-0.16335 0.33932 0.70994 0.91454
  -1  11   8    0.67    3.53   1-0.69314-0.69003 0.17665 0.69392 0.69881 0.20573
  -1 -11   7   -4.50    3.78   1-0.38052-0.81204 0.88370 0.37979-0.27250-0.44310
   1 -11  -7   -2.22    3.29   1-0.80910-0.84403-0.00323-0.51832-0.58766-0.13762
   1 -11  -7   -3.59    2.80   1 0.19129 0.16207-0.35700-0.87162-0.91430-0.46260
   1  11  -7    2.43    2.62   1-0.66528-0.23266-0.13223 0.37336 0.73478 0.89803
  -1  11   7    0.19    3.53   1-0.70295-0.66758 0.19326 0.70725 0.68447 0.23264
  -1 -11   6   -3.30    3.25   1-0.43192-0.83166 0.84685 0.33978-0.31030-0.43916
   1 -11  -6    1.79    2.51   1-0.80761-0.87454 0.06079-0.45107-0.58656-0.17807
   1 -11  -6    0.88    3.03   1 0.21659 0.15515-0.33670-0.84844-0.91636-0.50603
   1  11  -6    0.14    4.02   1-0.64428-0.24394-0.10094 0.40756 0.75809 0.87998
  -1  11   6   -0.59    2.68   1-0.71172-0.64410 0.20862 0.71932 0.67076 0.26019
  -1 -11   5    4.80    2.67   1-0.48295-0.85140 0.80360 0.29369-0.34782-0.43456
   1 -11  -5   -0.03    2.23   1-0.80204-0.90096 0.13207-0.37658-0.58247-0.21552
   1 -11  -5    3.20    3.34   1 0.24472 0.15105-0.31348-0.82234-0.91751-0.54857
   1  11  -5    7.91    4.09   1-0.62212-0.25405-0.06958 0.44184 0.77981 0.86036
  -1  11   5   -1.32    2.46   1-0.71942-0.61954 0.22255 0.72996 0.65795 0.28865
  -1 -11   4    2.26    3.52   1-0.53368-0.87030 0.75289 0.23979-0.38513-0.43020
   1 -11  -4   -3.88    2.88   1-0.79123-0.92213 0.20946-0.29597-0.57452-0.24911
   1 -11  -4    1.67    3.49   1 0.27505 0.14915-0.28765-0.79363-0.91738-0.58983
   1  11  -4    6.03    3.44   1-0.59889-0.26309-0.03825 0.47609 0.79991 0.83911
  -1  11   4    2.56    3.83   1-0.72597-0.59384 0.23479 0.73891 0.64639 0.31835
  -1 -11   3    1.88    3.39   1-0.58279-0.88756 0.69490 0.17861-0.42124-0.42464
   1 -11  -3    2.24    2.79   1-0.77399-0.93696 0.29199-0.21071-0.56184-0.27874
   1 -11  -3    1.19    2.79   1 0.30698 0.14885-0.25954-0.76262-0.91564-0.62947
   1  11  -3    4.73    3.47   1-0.57469-0.27116-0.00706 0.51020 0.81833 0.81618
  -1  11   3    1.05    2.21   1-0.73129-0.56691 0.24500 0.74584 0.63653 0.34974
  -1 -11   2    0.76    3.62   1-0.62921-0.90213 0.62985 0.11038-0.45537-0.41710
   1 -11  -2    1.00    3.04   1-0.75009-0.94498 0.37566-0.12381-0.54426-0.30278
   1 -11  -2    0.79    2.87   1 0.33994 0.14959-0.22946-0.72966-0.91202-0.66723
   1  11  -2    1.75    3.12   1-0.54967-0.27842 0.02381 0.54400 0.83503 0.79154
   1  11  -2    1.61    2.08   1-0.61653-0.33912 0.06189 0.57914 0.78489 0.74133
  -1  11   2    4.86    3.03   1-0.73522-0.53858 0.25272 0.75027 0.62894 0.38341
  -1 -11   1    1.22    3.55   1-0.67177-0.91285 0.55844 0.03578-0.48667-0.40672
   1 -11  -1    4.74    2.39   1-0.71928-0.94609 0.45885-0.03740-0.52161-0.32173
   1 -11  -1    7.19    3.51   1 0.37285 0.15035-0.19830-0.69532-0.90645-0.70279
   1  11  -1    6.37    3.62   1-0.52401-0.28503 0.05423 0.57734 0.84998 0.76513
   1  11  -1    4.10    2.42   1-0.64520-0.40003 0.10227 0.62285 0.75713 0.67232
  -1  11   1    2.89    2.44   1-0.73749-0.50860 0.25725 0.75152 0.62443 0.42016
   1 -11   0   27.03    3.40   1-0.68202-0.94075 0.53906 0.04602-0.49421-0.33594
  -1 -11   0   13.94    3.34   1-0.70932-0.91877 0.48205-0.04362-0.51428-0.39236
   1  11   0   19.99    3.32   1-0.49793-0.29123 0.08397 0.61000 0.86313 0.73694
  -1  11   0   16.74    3.51   1-0.41627-0.16053 0.17060 0.66400 0.89308 0.73029
   1  11   0   17.87    2.87   1-0.66140-0.44845 0.12631 0.65022 0.73931 0.61326
  -1  11   0   21.14    2.85   1-0.73765-0.47650 0.25756 0.74854 0.62412 0.46111
   1 -11   1   15.34    3.64   1-0.63933-0.92977 0.61403 0.12397-0.46282-0.34662
  -1 -11  -1   20.99    3.22   1-0.74112-0.91865 0.40205-0.12684-0.53767-0.37413
   1  11   1   24.69    2.86   1-0.47172-0.29729 0.11279 0.64174 0.87450 0.70695
  -1  11  -1   23.10    3.22   1-0.44869-0.16067 0.13729 0.62777 0.88307 0.76162
   1  11   1   26.06    3.53   1-0.67023-0.48952 0.13986 0.66711 0.72884 0.56154
  -1  11  -1   15.45    2.44   1-0.73485-0.44145 0.25199 0.73968 0.62966 0.50791
   1 -11   2    4.32    3.56   1-0.59238-0.91467 0.68237 0.19549-0.42829-0.35377
  -1 -11  -2    2.67    3.04   1-0.76652-0.91214 0.32080-0.21131-0.55635-0.35120
  -1  11  -2   -1.76    2.57   1-0.48056-0.16026 0.10319 0.59075 0.87086 0.79077
   1  11   2   -1.71    2.86   1-0.44571-0.30356 0.14041 0.67228 0.88409 0.67519
   1  11   2   -0.08    2.84   1-0.67428-0.52579 0.14617 0.67675 0.72386 0.51530
  -1  11  -2   -0.88    2.30   1-0.72749-0.40183 0.23767 0.72207 0.64363 0.56314
   1 -11   3    7.34    3.58   1-0.54250-0.89663 0.74318 0.25950-0.39161-0.35876
  -1 -11  -3    2.87    3.94   1-0.78557-0.89928 0.23993-0.29501-0.57035-0.32288
  -1  11  -3   -3.93    3.57   1-0.51159-0.15902 0.06853 0.55318 0.85648 0.81774
   1  11   3    0.16    2.91   1-0.42032-0.31044 0.16651 0.70130 0.89196 0.64171
   1  11   3    2.28    2.12   1-0.67493-0.55867 0.14720 0.68112 0.72304 0.47323
   1 -11   4   14.55    3.07   1-0.49091-0.87688 0.79618 0.31568-0.35368-0.36250
  -1 -11  -4   16.78    3.29   1-0.79835-0.88008 0.16277-0.37539-0.57976-0.29075
  -1 -11  -4   11.44    2.87   1 0.38093 0.30426-0.19047-0.72859-0.90477-0.61366
  -1  11  -4   14.00    4.38   1-0.54158-0.15674 0.03353 0.51526 0.83997 0.84257
   1  11   4   15.03    4.03   1-0.67303-0.58900 0.14422 0.68147 0.72541 0.43435
   1 -11   5   10.28    3.00   1-0.43898-0.85641 0.84127 0.36366-0.31549-0.36647
  -1 -11  -5   13.38    3.73   1-0.80579-0.85552 0.09058-0.45079-0.58522-0.25467
  -1 -11  -5    9.28    3.06   1 0.35671 0.31228-0.21373-0.75471-0.90943-0.57695
  -1  11  -5   20.11    3.63   1-0.57036-0.15324-0.00163 0.47717 0.82138 0.86534
   1  11   5   12.30    2.73   1-0.66909-0.61729 0.13809 0.67867 0.73023 0.39792
   1 -11   6   27.33    3.77   1-0.38695-0.83614 0.87943 0.40496-0.27723-0.36995
  -1 -11  -6   29.70    3.53   1-0.80886-0.82660 0.02465-0.51993-0.58748-0.21538
  -1 -11  -6   26.35    3.66   1 0.33535 0.32303-0.23371-0.77791-0.91264-0.53897
  -1  11  -6   30.76    3.99   1-0.59779-0.14839-0.03680 0.43908 0.80080 0.88610
   1  11   6   20.46    4.15   1-0.66344-0.64387 0.12941 0.67333 0.73695 0.36339
   1 -11   7    9.32    3.01   1-0.33562-0.81658 0.91104 0.43971-0.23948-0.37394
  -1 -11  -7   11.57    3.75   1-0.80863-0.79438-0.03424-0.58205-0.58731-0.17367
  -1 -11  -7    8.03    2.96   1 0.31626 0.33617-0.25117-0.79826-0.91481-0.49976
  -1  11  -7   12.51    3.26   1-0.62377-0.14210-0.07186 0.40110 0.77828 0.90494
   1  11   7   17.52    4.20   1-0.65629-0.66895 0.11862 0.66588 0.74512 0.33031
   1 -11   8    6.93    2.99   1-0.28538-0.79811 0.93676 0.46858-0.20254-0.37873
  -1 -11  -8   -6.86    3.58   1-0.80613-0.75989-0.08583-0.63685-0.58547-0.13029
  -1  11  -8    4.56    3.66   1-0.64823-0.13429-0.10670 0.36334 0.75392 0.92192
   1  11   8    9.87    3.76   1-0.64779-0.69268 0.10605 0.65664 0.75439 0.29833
   1 -11   9    0.54    3.85   1-0.23644-0.78095 0.95726 0.49222-0.16655-0.38449
  -1 -11  -9   -0.39    3.43   1-0.80233-0.72614-0.12932-0.68229-0.58268-0.08485
  -1  11  -9   -1.46    5.20   1-0.67112-0.12490-0.14123 0.32589 0.72776 0.93711
   1  11   9   -6.09    5.16   1-0.63804-0.71516 0.09195 0.64587 0.76448 0.26717
   1 -11  10    0.86    4.58   1-0.18892-0.76520 0.97313 0.51123-0.13161-0.39128
  -1 -11 -10    8.91    3.84   1-0.79781-0.68970-0.16683-0.72298-0.57936-0.03996
  -1  11 -10    5.83    4.13   1-0.69238-0.11389-0.17539 0.28882 0.69988 0.95058
   1  11  10    2.33    3.06   1-0.62711-0.73645 0.07650 0.63375 0.77516 0.23660
   1 -11  11   -4.80    4.58   1-0.14299-0.75085 0.98487 0.52600-0.09784-0.39942
  -1 -11 -11    1.87    3.14   1-0.79317-0.65315-0.19786-0.75720-0.57595 0.00500
  -1  11 -11    0.03    3.68   1-0.71200-0.10123-0.20911 0.25218 0.67031 0.96237
   1  11  11   -3.39    3.52   1-0.61502-0.75660 0.05984 0.62044 0.78623 0.20642
   1 -11  12    2.80    3.32   1-0.09834-0.73795 0.99302 0.53729-0.06500-0.40833
  -1 -11 -12   -0.42    4.16   1-0.78882-0.61690-0.22294-0.78546-0.57275 0.04975
  -1  11 -12   10.75    3.99   1-0.72992-0.08688-0.24235 0.21602 0.63911 0.97251
   1  11  12    4.57    4.40   1-0.60181-0.77561 0.04210 0.60603 0.79752 0.17646
   1 -11  13   -5.06    4.35   1-0.05504-0.72641 0.99793 0.54533-0.03316-0.41824
  -1 -11 -13   -2.62    5.72   1-0.78504-0.58120-0.24259-0.80829-0.56996 0.09410
  -1  11 -13   10.74    6.35   1-0.74615-0.07083-0.27507 0.18037 0.60629 0.98104
   1  11  13   -3.33    3.76   1-0.58748-0.79351 0.02337 0.59063 0.80890 0.14659
  -1 -13  11    0.69    4.77   1-0.20254-0.80365 0.96897 0.38497-0.14162-0.45379
   1 -13 -11    1.25    3.78   1-0.80876-0.75833-0.02911-0.64958-0.58741 0.05443
   1  13 -11    3.62    4.97   1-0.73440-0.13063-0.25109 0.33550 0.63055 0.93293
  -1  13  11   11.86    4.38   1-0.63986-0.68961 0.09455 0.71418 0.76264 0.11991
  -1 -13  10   -1.48    3.10   1-0.24788-0.81723 0.95285 0.36570-0.17497-0.44540
   1 -13 -10    4.65    2.99   1-0.80909-0.79065 0.00513-0.61212-0.58765 0.01265
   1  13 -10    0.55    4.26   1-0.71967-0.14818-0.22302 0.36649 0.65751 0.91854
  -1  13  10   -4.48    3.71   1-0.65167-0.66919 0.11176 0.72804 0.75021 0.14874
  -1 -13   9    8.82    4.94   1-0.29388-0.83145 0.93275 0.34246-0.20879-0.43748
   1 -13  -9   -6.48    3.14   1-0.80828-0.82184 0.04503-0.56901-0.58706-0.02829
   1  13  -9   -1.35    3.59   1-0.70391-0.16470-0.19491 0.39751 0.68301 0.90269
  -1  13   9    0.71    4.17   1-0.66242-0.64771 0.12786 0.74082 0.73813 0.17790
  -1 -13   8   -0.25    3.95   1-0.34035-0.84616 0.90836 0.31493-0.24296-0.42991
   1 -13  -8    0.90    4.48   1-0.80578-0.85133 0.09063-0.52019-0.58522-0.06800
   1  13  -8    2.80    4.02   1-0.68719-0.18025-0.16684 0.42850 0.70704 0.88537
  -1  13   8   -3.52    4.74   1-0.67210-0.62516 0.14276 0.75238 0.72656 0.20758
  -1 -13   7    0.35    2.84   1-0.38706-0.86110 0.87936 0.28278-0.27731-0.42253
   1 -13  -7   -0.78    3.63   1-0.80096-0.87849 0.14178-0.46583-0.58167-0.10600
   1  13  -7    0.23    4.45   1-0.66961-0.19494-0.13889 0.45937 0.72960 0.86658
  -1  13   7   -2.41    3.76   1-0.68045-0.60202 0.15594 0.76221 0.71600 0.23787
  -1 -13   6   -0.32    3.13   1-0.43369-0.87596 0.84546 0.24574-0.31160-0.41508
   1 -13  -6   -1.91    2.75   1-0.79314-0.90266 0.19808-0.40631-0.57592-0.14178
   1 -13  -6   -0.86    3.06   1 0.32163 0.21832-0.24630-0.85089-0.91426-0.47782
   1  13  -6    2.76    3.60   1-0.65125-0.20886-0.11114 0.49004 0.75067 0.84630
  -1  13   6    3.81    3.84   1-0.68787-0.57719 0.16795 0.77093 0.70613 0.26925
  -1 -13   5   -0.32    4.32   1-0.47983-0.89032 0.80645 0.20359-0.34553-0.40727
   1 -13  -5    3.99    4.14   1-0.78145-0.92314 0.25974-0.34202-0.56733-0.17553
   1 -13  -5    1.00    3.05   1 0.33984 0.20430-0.22955-0.83126-0.91203-0.51697
   1  13  -5    0.33    2.93   1-0.63223-0.22212-0.08369 0.52041 0.77024 0.82452
  -1  13   5    1.48    4.10   1-0.69406-0.55113 0.17818 0.77788 0.69750 0.30189
  -1 -13   4   13.02    4.24   1-0.52467-0.90381 0.76252 0.15678-0.37850-0.39816
   1 -13  -4    3.81    3.51   1-0.76568-0.93930 0.32384-0.27469-0.55573-0.20555
   1 -13  -4    5.30    3.03   1 0.35962 0.19198-0.21097-0.80939-0.90893-0.55499
   1  13  -4    3.09    5.04   1-0.61268-0.23484-0.05667 0.55035 0.78829 0.80122
  -1  13   4    2.79    3.43   1-0.69891-0.52372 0.18635 0.78276 0.69050 0.33614
  -1 -13   3    1.95    2.75   1-0.56823-0.91552 0.71314 0.10420-0.41053-0.38852
   1 -13  -3    0.75    3.27   1-0.74526-0.95079 0.39014-0.20518-0.54071-0.23214
   1 -13  -3    1.26    3.66   1 0.38186 0.18199-0.18956-0.78512-0.90456-0.59199
   1  13  -3   -0.71    3.82   1-0.59274-0.24718-0.03020 0.57974 0.80482 0.77640
  -1  13   3    7.88    3.80   1-0.70223-0.49479 0.19201 0.78514 0.68556 0.37246
  -1 -13   2    2.07    3.37   1-0.60950-0.92495 0.65888 0.04675-0.44088-0.37719
   1 -13  -2   15.05    3.39   1-0.71998-0.95743 0.45716-0.13492-0.52212-0.25516
   1  13  -2    6.12    4.64   1-0.57260-0.25931-0.00443 0.60842 0.81981 0.75004
  -1  13   2    2.50    3.58   1-0.41692-0.18368 0.16994 0.76186 0.89291 0.62114
  -1  13   2    5.53    3.19   1-0.70374-0.46404 0.19462 0.78445 0.68327 0.41144
  -1 -13   1   -1.46    3.67   1-0.64779-0.93140 0.60029-0.01501-0.46904-0.36368
   1 -13  -1   -2.21    2.47   1-0.68993-0.95930 0.52341-0.06546-0.50003-0.27467
   1  13  -1    1.45    4.09   1-0.55245-0.27143 0.02044 0.63623 0.83329 0.72217
  -1  13   1   -0.43    3.38   1-0.44060-0.17509 0.14573 0.73472 0.88579 0.65537
   1  13  -1   -5.76    2.31   1-0.60307-0.31475 0.04377 0.65659 0.79648 0.68542
  -1  13   1    0.33    2.88   1-0.70300-0.43105 0.19334 0.77989 0.68440 0.45382
   1 -13   0   20.53    3.80   1-0.65547-0.95659 0.58738 0.00148-0.47469-0.29140
  -1 -13   0   21.89    3.74   1-0.68239-0.93441 0.53834-0.07994-0.49449-0.34709
   1  13   0   11.50    3.73   1-0.53254-0.28379 0.04426 0.66296 0.84524 0.69277
  -1  13   0   21.11    4.45   1-0.46498-0.16719 0.12003 0.70611 0.87714 0.68807
   1  13   0    8.31    3.10   1-0.62349-0.36740 0.07147 0.68762 0.77855 0.62624
  -1  13   0   16.93    3.13   1-0.69928-0.39507 0.18697 0.77024 0.68995 0.50064
   1 -13   1    0.96    2.48   1-0.61717-0.95014 0.64784 0.06513-0.44653-0.30491
  -1 -13  -1    0.28    3.30   1-0.71296-0.93306 0.47373-0.14777-0.51696-0.32795
   1  13   1    9.57    3.96   1-0.51313-0.29666 0.06677 0.68839 0.85570 0.66188
  -1  13  -1   -0.24    4.01   1-0.48975-0.15968 0.09308 0.67624 0.86688 0.71916
   1  13   1   -5.17    3.11   1-0.63590-0.41204 0.08889 0.70838 0.76662 0.57307
  -1  13  -1   -0.35    2.53   1-0.69131-0.35485 0.17361 0.75359 0.70138 0.55332
   1 -13   2   46.75    4.71   1-0.57572-0.94053 0.70388 0.12435-0.41604-0.31610
  -1 -13  -2   58.53    5.47   1-0.73900-0.92719 0.40797-0.21676-0.53611-0.30550
  -1  13  -2   44.44    3.72   1-0.51461-0.15227 0.06508 0.64532 0.85494 0.74857
   1  13   2   45.80    3.98   1-0.49455-0.31035 0.08775 0.71229 0.86470 0.62953
   1  13   2   54.72    3.53   1-0.64294-0.45131 0.09900 0.72182 0.75948 0.52467
   1 -13   3   -1.45    4.79   1-0.53186-0.92852 0.75486 0.17853-0.38379-0.32552
  -1 -13  -3    2.34    4.57   1-0.76040-0.91666 0.34241-0.28554-0.55185-0.27962
  -1  13  -3   -0.62    4.27   1-0.53934-0.14472 0.03621 0.61353 0.84130 0.77629
   1  13   3   -2.57    3.16   1-0.47716-0.32524 0.10689 0.73435 0.87228 0.59576
   1  13   3   -0.87    4.29   1-0.64613-0.48673 0.10363 0.72979 0.75614 0.48008
   1 -13   4    1.78    3.53   1-0.48634-0.91484 0.80046 0.22732-0.35032-0.33373
  -1 -13  -4   14.57    4.38   1-0.77724-0.90158 0.27842-0.35275-0.56423-0.25039
  -1  13  -4    5.69    4.68   1-0.56370-0.13682 0.00665 0.58105 0.82594 0.80227
   1  13   4    7.13    3.13   1-0.46139-0.34175 0.12387 0.75425 0.87850 0.56063
   1  13   4    9.50    4.38   1-0.64641-0.51924 0.10403 0.73352 0.75586 0.43855
   1 -13   5   -1.31    3.60   1-0.44013-0.90007 0.84036 0.27009-0.31634-0.34193
  -1 -13  -5   -1.91    3.05   1-0.78999-0.88232 0.21650-0.41741-0.57361-0.21741
  -1  13  -5    3.04    3.11   1-0.58753-0.12837-0.02344 0.54804 0.80886 0.82654
   1  13   5    0.82    2.40   1-0.44773-0.36036 0.13830 0.77159 0.88340 0.52418
   1  13   5   -0.90    3.50   1-0.64436-0.54941 0.10105 0.73387 0.75801 0.39945
   1 -13   6   16.38    4.28   1-0.39326-0.88497 0.87515 0.30802-0.28187-0.34920
  -1 -13  -6    4.84    4.74   1-0.79884-0.85918 0.15907-0.47805-0.58012-0.18238
  -1  13  -6   18.10    5.33   1-0.61066-0.11922-0.05393 0.51462 0.79005 0.84908
   1  13   6   13.18    3.90   1-0.64038-0.57766 0.09529 0.73145 0.76212 0.36231
   1 -13   7   -6.29    4.16   1-0.34641-0.86989 0.90486 0.34088-0.24742-0.35649
  -1 -13  -7   -2.03    4.56   1-0.80454-0.83289 0.10625-0.53409-0.58431-0.14502
  -1  13  -7   -1.29    3.05   1-0.63295-0.10924-0.08470 0.48093 0.76954 0.86992
   1  13   7   -1.76    2.84   1-0.63473-0.60425 0.08723 0.72672 0.76779 0.32673
   1 -13   8    4.05    3.04   1-0.29992-0.85517 0.92982 0.36898-0.21323-0.36404
  -1 -13  -8    9.27    3.48   1-0.80772-0.80408 0.05853-0.58502-0.58664-0.10582
  -1  13  -8    6.62    4.82   1-0.65429-0.09830-0.11564 0.44708 0.74734 0.88907
   1  13   8    9.77    4.90   1-0.62760-0.62935 0.07719 0.72002 0.77469 0.29238
   1 -13   9   -3.84    4.18   1-0.25403-0.84105 0.95039 0.39269-0.17949-0.37203
  -1 -13  -9    1.26    4.38   1-0.80900-0.77336 0.01617-0.63059-0.58758-0.06521
  -1  13  -9   -0.46    3.46   1-0.67458-0.08632-0.14665 0.41315 0.72347 0.90656
   1  13   9    9.36    4.78   1-0.61912-0.65309 0.06544 0.71160 0.78256 0.25900
   1 -13  10    0.94    4.35   1-0.20891-0.82770 0.96692 0.41237-0.14631-0.38059
  -1 -13 -10    0.65    4.27   1-0.80893-0.74131-0.02076-0.67074-0.58753-0.02362
  -1  13 -10   -2.26    5.27   1-0.69374-0.07320-0.17765 0.37923 0.69796 0.92239
   1  13  10    2.62    3.59   1-0.60936-0.67556 0.05219 0.70169 0.79116 0.22635
   1 -13  11    5.27    3.83   1-0.16480-0.81515 0.97973 0.42819-0.11387-0.39008
  -1 -13 -11   -3.39    4.72   1-0.80799-0.70839-0.05238-0.70557-0.58685 0.01860
  -1  13 -11   -0.28    3.88   1-0.71168-0.05887-0.20855 0.34541 0.67082 0.93660
   1  13  11   -5.13    3.33   1-0.59839-0.69682 0.03759 0.69042 0.80031 0.19425
  -1 -15   9    0.79    4.19   1-0.29574-0.87583 0.93186 0.24891-0.21016-0.41346
   1  15  -9   -0.38    4.15   1-0.70955-0.12829-0.20477 0.48033 0.67424 0.86764
  -1  15   9   -0.92    5.32   1-0.63682-0.57897 0.09021 0.79540 0.76571 0.17923
  -1 -15   8    2.52    3.71   1-0.33903-0.88735 0.90911 0.22302-0.24199-0.40355
   1 -15  -8    2.54    4.87   1-0.78871-0.87685 0.22354-0.47982-0.57267-0.02980
   1  15  -8   -1.33    5.99   1-0.69478-0.14580-0.17938 0.50863 0.69648 0.84854
  -1  15   8    1.70    4.65   1-0.64530-0.55522 0.10242 0.80428 0.75702 0.21179
  -1 -15   7   -2.23    4.54   1-0.38217-0.89873 0.88261 0.19338-0.27372-0.39355
   1 -15  -7    1.61    3.79   1-0.77933-0.89975 0.26933-0.43149-0.56577-0.06528
   1  15  -7    3.85    5.49   1-0.67945-0.16274-0.15435 0.53658 0.71729 0.82800
  -1  15   7   -1.49    4.15   1-0.65255-0.53024 0.11306 0.81159 0.74925 0.24527
  -1 -15   6    8.39    3.58   1-0.42492-0.90970 0.85224 0.15986-0.30515-0.38324
   1 -15  -6   -2.12    3.45   1-0.76740-0.91974 0.31754-0.38005-0.55700-0.09812
   1  15  -6   -0.58    6.92   1-0.66368-0.17925-0.12977 0.56408 0.73667 0.80602
  -1  15   6    0.37    3.23   1-0.65849-0.50395 0.12192 0.81711 0.74264 0.27991
  -1 -15   5   -5.93    4.74   1-0.46694-0.91995 0.81794 0.12242-0.33605-0.37240
   1 -15  -5    4.11    3.88   1-0.75238-0.93664 0.36858-0.32579-0.54595-0.12868
   1  15  -5   -2.09    4.40   1-0.64759-0.19543-0.10575 0.59102 0.75461 0.78262
  -1  15   5    0.30    4.90   1-0.66299-0.47622 0.12873 0.82058 0.73747 0.31599
  -1 -15   4    2.23    3.71   1-0.50762-0.92929 0.77999 0.08159-0.36596-0.36021
   1 -15  -4   -2.57    4.17   1-0.73398-0.95015 0.42166-0.26949-0.53242-0.15676
   1  15  -4    5.09    5.07   1-0.63132-0.21144-0.08240 0.61729 0.77113 0.75778
  -1  15   4   -0.38    4.23   1-0.44502-0.23429 0.14113 0.83156 0.88432 0.50358
  -1  15   4   -3.58    3.66   1-0.66586-0.44686 0.13311 0.82163 0.73409 0.35387
  -1 -15   3    1.87    3.78   1-0.54711-0.93694 0.73799 0.03640-0.39500-0.34758
   1 -15  -3   -4.84    2.93   1-0.71202-0.96012 0.47589-0.21203-0.51627-0.18223
   1  15  -3    3.24    3.84   1-0.61503-0.22742-0.05986 0.64275 0.78622 0.73153
  -1  15   3    1.94    3.01   1-0.45943-0.21643 0.12595 0.81346 0.87923 0.53984
  -1  15   3    2.85    3.68   1-0.66683-0.41560 0.13460 0.81979 0.73294 0.39396
  -1 -15   2    2.34    3.96   1-0.58467-0.94265 0.69248-0.01228-0.42263-0.33353
   1 -15  -2    5.88    4.17   1-0.68648-0.96649 0.53032-0.15438-0.49749-0.20505
   1  15  -2    4.30    3.69   1-0.59890-0.24357-0.03826 0.66727 0.79990 0.70386
  -1  15   2   -1.58    4.05   1-0.47547-0.20019 0.10873 0.79332 0.87298 0.57494
  -1  15   2    3.74    3.05   1-0.66549-0.38203 0.13254 0.81439 0.73454 0.43681
  -1 -15   1    1.28    4.49   1-0.61987-0.94600 0.64388-0.06407-0.44851-0.31774
   1 -15  -1    3.77    4.06   1-0.65745-0.96926 0.58398-0.09775-0.47614-0.22577
   1  15  -1   -6.68    4.91   1-0.58313-0.26007-0.01779 0.69066 0.81217 0.67478
  -1  15   1   -0.61    3.01   1-0.49279-0.18524 0.08970 0.77137 0.86550 0.60881
  -1  15   1   -0.32    3.97   1-0.66119-0.34551 0.12600 0.80452 0.73955 0.48307
   1 -15   0   -0.27    3.52   1-0.62524-0.96889 0.63588-0.04266-0.45245-0.24376
  -1 -15   0    2.61    3.23   1-0.65230-0.94659 0.59277-0.11837-0.47235-0.29991
   1  15   0    1.75    3.24   1-0.56795-0.27716 0.00138 0.71276 0.82306 0.64431
  -1  15   0   -7.65    5.24   1-0.51110-0.17127 0.06909 0.74784 0.85673 0.64139
   1 -15   1   -4.80    3.47   1-0.59015-0.96565 0.68533 0.00997-0.42665-0.25963
  -1 -15  -1   -4.10    3.56   1-0.68157-0.94423 0.53993-0.17419-0.49388-0.27940
   1  15   1    7.83    4.64   1-0.55360-0.29509 0.01905 0.73334 0.83256 0.61246
  -1  15  -1    5.80    3.86   1-0.53013-0.15803 0.04708 0.72292 0.84660 0.67261
   1  15   1    2.93    3.89   1-0.59346-0.32646 0.03113 0.74286 0.80425 0.58444
   1 -15   2    2.16    4.52   1-0.55262-0.95996 0.73168 0.05951-0.39906-0.27371
  -1 -15  -2    0.10    4.44   1-0.70758-0.93832 0.48595-0.23139-0.51300-0.25691
   1  15   2   -0.27    3.49   1-0.54038-0.31415 0.03496 0.75218 0.84069 0.57924
  -1  15  -2   -3.50    3.92   1-0.54963-0.14525 0.02386 0.69678 0.83506 0.70242
   1  15   2   -0.04    3.55   1-0.60405-0.36928 0.04509 0.76015 0.79566 0.53460
   1 -15   3   -1.64    3.32   1-0.51311-0.95230 0.77447 0.10549-0.37000-0.28633
  -1 -15  -3    6.19    3.41   1-0.73009-0.92892 0.43187-0.28869-0.52956-0.23186
  -1  15  -3    0.08    3.79   1-0.56939-0.13273-0.00041 0.66958 0.82206 0.73077
   1  15   3    2.95    3.95   1-0.52862-0.33466 0.04885 0.76899 0.84744 0.54465
   1  15   3    2.60    4.11   1-0.61019-0.40765 0.05331 0.77171 0.79045 0.48813
   1 -15   4    2.92    3.24   1-0.47231-0.94300 0.81320 0.14713-0.34000-0.29847
  -1 -15  -4   -4.81    4.46   1-0.74913-0.91603 0.37860-0.34519-0.54356-0.20424
  -1  15  -4   -2.60    3.44   1-0.58919-0.12026-0.02558 0.64148 0.80758 0.75764
   1  15   4   -2.26    3.83   1-0.61296-0.44264 0.05704 0.77877 0.78804 0.44448
   1 -15   5   -0.99    5.04   1-0.43029-0.93275 0.84811 0.18518-0.30910-0.30931
  -1 -15  -5    2.30    4.36   1-0.76481-0.89980 0.32699-0.40002-0.55509-0.17417
  -1  15  -5    3.32    5.10   1-0.60887-0.10766-0.05152 0.61263 0.79159 0.78300
   1  15   5   -0.03    4.71   1-0.61304-0.47495 0.05715 0.78222 0.78797 0.40316
   1 -15   6   -1.54    4.48   1-0.38760-0.92182 0.87900 0.21921-0.27770-0.31965
  -1 -15  -6    4.31    4.25   1-0.77738-0.88045 0.27782-0.45242-0.56434-0.14180
  -1  15  -6   -0.47    4.94   1-0.62826-0.09478-0.07810 0.58313 0.77407 0.80682
   1  15   6   -3.08    4.66   1-0.61091-0.50505 0.05428 0.78267 0.78983 0.36376
   1 -15   7   -4.05    5.07   1-0.34456-0.91056 0.90594 0.24929-0.24606-0.32974
  -1 -15  -7    2.70    3.78   1-0.78733-0.85827 0.23091-0.50196-0.57165-0.10672
  -1  15  -7   -2.91    5.42   1-0.64722-0.08146-0.10521 0.55310 0.75500 0.82911
   1  15   7    0.17    3.77   1-0.60690-0.53327 0.04888 0.78062 0.79326 0.32595
   1 -15   8    0.20    3.96   1-0.30145-0.89922 0.92907 0.27557-0.21436-0.33978
  -1 -15  -8    1.54    5.05   1-0.79469-0.83364 0.18832-0.54777-0.57706-0.07059
  -1  15  -8   -0.48    3.47   1-0.66561-0.06758-0.13273 0.52266 0.73439 0.84985
   1  15   8   -0.16    4.98   1-0.60123-0.55983 0.04134 0.77640 0.79800 0.28944
   1 -15   9   -1.53    4.62   1-0.25850-0.88804 0.94856 0.29820-0.18277-0.34993
  -1 -15  -9   -1.88    4.21   1-0.80002-0.80699 0.14967-0.58963-0.58099-0.03297
  -1  15  -9   -0.08    4.28   1-0.68333-0.05303-0.16058 0.49190 0.71222 0.86903
   1  15   9   -4.44    5.29   1-0.59406-0.58489 0.03192 0.77032 0.80378 0.25396
  -1 -17   4   -1.19    4.39   1-0.48400-0.94820 0.80263 0.01159-0.34860-0.31744
   1  17  -4   -1.66    4.53   1-0.65299-0.19107-0.11371 0.67866 0.74877 0.70916
  -1 -17   3    4.60    4.81   1-0.52039-0.95275 0.76700-0.02722-0.37536-0.30252
   1 -17  -3   -4.42    4.50   1-0.67456-0.96522 0.55326-0.22727-0.48872-0.12921
   1  17  -3   -8.95    5.67   1-0.63983-0.21018-0.09451 0.70077 0.76267 0.68171
  -1 -17   2   -4.32    4.09   1-0.55513-0.95564 0.72876-0.06865-0.40090-0.28639
   1 -17  -2   -7.57    4.45   1-0.64929-0.97178 0.59781-0.17976-0.47014-0.15269
   1  17  -2    1.37    4.35   1-0.62706-0.22968-0.07643 0.72178 0.77521 0.65289
  -1  17   2   -1.01    4.70   1-0.52900-0.21168 0.04840 0.82567 0.84723 0.52292
  -1 -17   1    0.25    3.85   1-0.58794-0.95660 0.68824-0.11236-0.42502-0.26884
   1 -17  -1   -8.14    4.79   1-0.62143-0.97577 0.64158-0.13280-0.44965-0.17387
   1  17  -1   -1.11    4.55   1-0.61485-0.24975-0.05961 0.74151 0.78638 0.62271
  -1  17   1    2.79    5.00   1-0.54149-0.19190 0.03364 0.80799 0.84002 0.55706
   1 -17   0    7.62    5.01   1-0.59109-0.97727 0.68409-0.08710-0.42734-0.19324
  -1 -17   0    1.83    4.59   1-0.61854-0.95536 0.64584-0.15794-0.44753-0.24967
   1  17   0    1.07    4.64   1-0.60343-0.27060-0.04425 0.75979 0.79618 0.59117
  -1  17   0    5.17    5.12   1-0.55513-0.17326 0.01718 0.78861 0.83158 0.58996
   1 -17   1   -4.01    3.95   1-0.55851-0.97654 0.72480-0.04319-0.40338-0.21095
  -1 -17  -1   -8.87    4.78   1-0.64671-0.95168 0.60208-0.20489-0.46824-0.22871
   1  17   1   -0.13    5.45   1-0.59301-0.29246-0.03055 0.77641 0.80460 0.55824
  -1  17  -1   -0.19    4.36   1-0.56968-0.15553-0.00077 0.76773 0.82186 0.62160
   1 -17   2    9.72    4.45   1-0.52396-0.97384 0.76327-0.00154-0.37798-0.22722
  -1 -17  -2   11.43    5.11   1-0.67227-0.94540 0.55751-0.25265-0.48704-0.20584
  -1  17  -2    4.11    5.16   1-0.58491-0.13849-0.02007 0.74552 0.81084 0.65193
   1 -17   3    8.48    5.56   1-0.48776-0.96948 0.79914 0.03751-0.35136-0.24228
  -1 -17  -3   -1.58    5.39   1-0.69514-0.93652 0.51273-0.30044-0.50386-0.18068
  -1  17  -3   -2.09    4.78   1-0.60063-0.12194-0.04054 0.72212 0.79849 0.68093
   1 -17   4   11.57    4.11   1-0.45042-0.96363 0.83198 0.07325-0.32391-0.25699
  -1 -17  -4   -0.18    5.40   1-0.71528-0.92475 0.46834-0.34806-0.51867-0.15388
  -1  17  -4    2.17    4.48   1-0.61665-0.10568-0.06207 0.69768 0.78478 0.70856
  -2   0  16    7.59    3.78   1 0.37266-0.08755 0.88428 0.90299 0.28134-0.42063
  -2   0  15    1.64    3.71   1 0.34905-0.07930 0.89914 0.91465 0.26399-0.39638
   2   0 -15    3.73    3.67   1-0.77441-0.33919-0.63198-0.64322 0.02968 0.68644
  -2   0  15   -3.24    3.03   1-0.54885-0.98361-0.02480-0.00799 0.83554 0.18012
  -2   0  14   -4.05    3.89   1 0.32510-0.07140 0.91301 0.92532 0.24638-0.37239
   2   0 -14    9.37    3.07   1-0.78275-0.37981-0.61899-0.62731 0.06444 0.67986
  -2   0  14    7.96    3.34   1-0.57640-0.97892 0.00922 0.02269 0.81711 0.20294
  -2   0  13   -0.44    2.92   1 0.30073-0.06392 0.92594 0.93504 0.22845-0.34871
   2   0 -13   -0.94    2.47   1-0.78962-0.41897-0.60580-0.61120 0.09739 0.67147
  -2   0  13   -0.96    3.18   1-0.60288-0.97317 0.04352 0.05366 0.79664 0.22372
  -2   0  12    7.61    2.43   1 0.27583-0.05696 0.93795 0.94385 0.21015-0.32540
   2   0 -12    0.41    3.25   1-0.79519-0.45682-0.59258-0.59507 0.12847 0.66120
  -2   0  12   10.72    3.30   1-0.62840-0.96647 0.07830 0.08511 0.77393 0.24226
  -2   0  11    1.77    2.36   1 0.25029-0.05065 0.94906 0.95177 0.19136-0.30258
   2   0 -11   -1.52    3.05   1-0.79957-0.49349-0.57953-0.57909 0.15753 0.64892
  -2   0  11    0.13    2.57   1-0.65309-0.95892 0.11385 0.11732 0.74867 0.25825
  -2   0  10    4.24    2.34   1 0.22391-0.04518 0.95931 0.95882 0.17196-0.28038
   2   0 -10    2.40    3.11   1-0.80290-0.52920-0.56690-0.56347 0.18428 0.63438
  -2   0  10    6.93    2.55   1-0.67704-0.95065 0.15053 0.15067 0.72037 0.27120
  -2   0   9    0.76    1.96   1 0.19641-0.04082 0.96870 0.96501 0.15174-0.25899
   2   0  -9   -0.66    2.28   1-0.80531-0.56389-0.55494-0.54859 0.20856 0.61731
  -2   0   9   -1.86    2.92   1-0.70024-0.94183 0.18860 0.18502 0.68854 0.28056
  -2   0   8  155.55    5.32   1 0.16737-0.03801 0.97723 0.97033 0.13039-0.23874
   2   0  -8  159.32    5.49   1-0.80695-0.59780-0.54409-0.53481 0.22976 0.59716
  -2   0   8  161.57    5.38   1-0.72305-0.93239 0.22929 0.22242 0.65162 0.28490
  -2   0   7   -0.94    2.29   1 0.13613-0.03740 0.98484 0.97475 0.10741-0.22011
   2   0  -7    1.91    2.73   1-0.80795-0.63107-0.53494-0.52275 0.24708 0.57312
  -2   0   7   -2.06    2.42   1-0.74533-0.92241 0.27335 0.26319 0.60807 0.28261
  -2   0   6  225.09    6.02   1 0.10055-0.04053 0.99160 0.97785 0.08125-0.20533
   2   0  -6  219.49    5.88   1-0.80847-0.66386-0.52838-0.51327 0.25920 0.54390
  -2   0   6  220.31    5.96   1-0.76691-0.91174 0.32238 0.30893 0.55489 0.27069
  -2   0   5    0.72    2.36   1 0.06034-0.04897 0.99683 0.97994 0.05168-0.19315
   2   0  -5   -1.10    2.11   1-0.80863-0.69630-0.52578-0.50775 0.26394 0.50729
  -2   0   5    0.59    2.29   1-0.78710-0.89967 0.37885 0.36212 0.48676 0.24382
  -2   0   4  248.77    5.64   1 0.01023-0.06733 0.99983 0.97980 0.01483-0.18826
   2   0  -4  237.78    5.91   1-0.80839-0.72834-0.52940-0.50845 0.25733 0.45932
  -2   0   4  243.38    5.90   1-0.80352-0.88384 0.44665 0.42663 0.39350 0.19182
  -2   0   3   -0.16    2.29   1-0.06052-0.10633 0.99747 0.97430-0.03719-0.19855
   2   0  -3    0.64    2.10   1-0.80706-0.75928-0.54317-0.51930 0.23152 0.39217
  -2   0   3   -2.06    2.23   1-0.80826-0.85642 0.53121 0.50770 0.25400 0.09363
  -2   0   2   80.20    4.81   1-0.18531-0.19935 0.97418 0.94787-0.12895-0.24856
   2   0  -2   81.93    3.75   1-0.80109-0.78558-0.57418-0.54746 0.16903 0.28833
  -2   0   2   90.23    3.73   1-0.77302-0.78890 0.63390 0.60716 0.02431-0.09479
  -2   0   1    1.18    2.05   1-0.50495-0.48727 0.78263 0.75318-0.36400-0.44188
   2   0  -1   -1.55    1.72   1-0.60113-0.61865 0.67055 0.69996-0.43473-0.35681
   2   0  -1   -9.10    4.04   1-0.77386-0.79064-0.63275-0.60311 0.02753 0.10550
   2   0  -1    2.03    2.42   1-0.55092-0.56734 0.71133 0.74130-0.43644-0.35859
  -2   0   1    2.37    3.27   1-0.60625-0.58983 0.71147 0.68150-0.35532-0.43317
  -2   0   0   86.86    3.42   1-0.72939-0.68021-0.43369-0.46663-0.52904-0.56529
   2   0   0   89.13    3.42   1-0.67877-0.72795-0.54531-0.51237-0.49182-0.45558
  -2   0   0   79.32    3.49   1-0.67970-0.63063-0.69829-0.73083-0.22445-0.26109
   2   0   0  100.36    4.13   1-0.64155-0.69062-0.70747-0.67492-0.29646-0.25982
  -2   0   0   85.71    3.84   1 0.14654 0.19504-0.59090-0.62420 0.79332 0.75652
   2   0   0   95.83    4.26   1 0.20157 0.15307-0.61822-0.58492 0.75971 0.79651
   2   0   1    0.82    2.30   1-0.16039-0.24176-0.58623-0.55085-0.79410-0.79881
  -2   0  -1    0.20    1.68   1-0.28872-0.20737-0.64514-0.68057-0.70740-0.70271
   2   0   1   -2.61    3.80   1-0.17521-0.25598-0.38325-0.34656 0.90687 0.90242
   2   0   2    7.06    2.48   1 0.29791 0.18477 0.92736 0.96625 0.22638 0.17946
   2   0   2    6.90    2.95   1 0.37377 0.26018-0.19741-0.15918-0.90626-0.95234
  -2   0  -2    5.64    2.44   1 0.17272 0.28629-0.37155-0.40979-0.91220-0.86608
   2   0   2    3.54    2.18   1-0.36975-0.48274-0.21618-0.17616 0.90362 0.85785
   2   0   3   -1.32    2.11   1 0.25923 0.11424 0.94531 0.98740 0.19793 0.10941
  -2   0  -3   -0.54    1.60   1-0.59577-0.44990-0.03415-0.07553 0.80242 0.88987
   2   0   3    0.03    2.25   1-0.45942-0.60460-0.12597-0.08255 0.87923 0.79223
   2   0   4   58.35    3.70   1 0.24669 0.06985 0.95054 0.99583 0.18871 0.05859
  -2   0  -4   54.70    3.05   1-0.69138-0.51324-0.17373-0.21803 0.70128 0.83008
   2   0   4   59.11    3.07   1-0.50191-0.67951-0.07951-0.03296 0.86125 0.73292
   2   0   5   -4.14    2.28   1 0.24641 0.03772 0.95065 0.99914 0.18851 0.01678
  -2   0  -5    0.00    1.60   1-0.73954-0.52912-0.26138-0.30860 0.62028 0.79044
   2   0   5    0.61    1.97   1-0.52194-0.73177-0.05663-0.00675 0.85109 0.68151
   2   0   6  285.87    6.78   1 0.25280 0.01226 0.94802 0.99972 0.19321-0.02012
  -2   0  -6  272.80    7.35   1-0.76757-0.52487-0.32401-0.37415 0.55303 0.76453
   2   0   6  277.30    6.64   1-0.52951-0.77157-0.04781 0.00539 0.84695 0.63611
   2   0   7    0.14    2.34   1 0.26320-0.00919 0.94359 0.99849 0.20085-0.05408
  -2   0  -7   -1.98    2.26   1-0.78526-0.51029-0.37301-0.42607 0.49418 0.74703
   2   0   7    0.82    2.36   1-0.52946-0.80375-0.04786 0.00867 0.84697 0.59489
   2   0   8   66.41    3.87   1 0.27618-0.02807 0.93779 0.99588 0.21040-0.08614
  -2   0  -8   66.75    3.55   1-0.79673-0.48949-0.41376-0.46973 0.44047 0.73467
   2   0   8   64.31    3.34   1-0.52432-0.83083-0.05387 0.00600 0.84981 0.55647
   2   0   9   -3.07    2.19   1 0.29091-0.04519 0.93081 0.99211 0.22123-0.11691
  -2   0  -9    0.28    1.77   1-0.80393-0.46441-0.44906-0.50796 0.38991 0.72546
   2   0   9    0.59    2.50   1-0.51546-0.85421-0.06410-0.00089 0.85451 0.51992
   2   0  10   12.64    2.79   1 0.30689-0.06106 0.92278 0.98728 0.23298-0.14677
  -2   0 -10   11.86    2.34   1-0.80787-0.43608-0.48052-0.54233 0.34122 0.71812
   2   0  10   10.91    2.28   1-0.50371-0.87469-0.07747-0.01092 0.86038 0.48455
   2   0  11   -2.51    2.89   1 0.32376-0.07604 0.91375 0.98145 0.24539-0.17596
  -2   0 -11   -2.17    2.52   1-0.80910-0.40503-0.50908-0.57381 0.29356 0.71181
   2   0  11   -2.47    2.52   1-0.48958-0.89278-0.09327-0.02338 0.86695 0.44986
   2   0  12    2.97    2.32   1 0.34132-0.09034 0.90375 0.97465 0.25830-0.20466
  -2   0 -12    0.08    3.23   1-0.80791-0.37157-0.53535-0.60300 0.24631 0.70591
   2   0  12    3.36    2.74   1-0.47397-0.90886-0.11036-0.03644 0.87359 0.41548
   2   0  13    0.44    3.34   1 0.35938-0.10413 0.89279 0.96688 0.27158-0.23298
  -2   0 -13    2.38    2.74   1-0.80443-0.33582-0.55969-0.63026 0.19904 0.69999
   2   0  13   -3.74    3.03   1-0.45593-0.92301-0.12967-0.05236 0.88051 0.38117
   2   0  14    4.57    3.13   1 0.37785-0.11752 0.88085 0.95815 0.28516-0.26101
  -2   0 -14    7.77    3.24   1-0.79876-0.29768-0.58219-0.65563 0.15173 0.69392
   2   0  14    4.54    2.53   1-0.43612-0.93540-0.15037-0.06967 0.88723 0.34665
   2   0  15   -0.28    3.09   1-0.41459-0.94606-0.17229-0.08820 0.89354 0.31173
  -2   0 -16    2.23    4.30   1-0.42457 0.13513-0.85250-0.93642-0.30489 0.32379
   2   0  16    4.94    4.72   1-0.39136-0.95502-0.19532-0.10785 0.89926 0.27622
  -2   0 -17   13.04    4.87   1-0.44376 0.14784-0.83743-0.92453-0.31901 0.35123
  -2  -2  17   -2.99    4.33   1 0.31333-0.22108 0.91940 0.84863 0.23772-0.48056
   2  -2 -17    6.11    3.74   1-0.49152-0.04109-0.79561-0.90916-0.35413 0.41441
  -2  -2  16   28.31    4.92   1 0.28387-0.21869 0.93420 0.86022 0.21605-0.46063
   2  -2 -16   23.25    4.65   1-0.47499-0.05647-0.81081-0.92118-0.34197 0.38500
   2   2 -16    7.33    4.56   1-0.79692-0.28745-0.58779-0.50923 0.13931 0.81120
  -2   2  16   24.31    4.71   1-0.56511-0.98895-0.00490 0.10747 0.82499 0.10207
  -2  -2  15    1.84    3.53   1 0.25342-0.21729 0.94777 0.87059 0.19366-0.44141
   2  -2 -15   12.81    3.31   1-0.45898-0.07237-0.82479-0.93197-0.33020 0.35522
   2   2 -15    2.10    3.17   1-0.80237-0.32525-0.56915-0.48763 0.17962 0.81019
  -2   2  15    2.01    3.77   1-0.59110-0.98271 0.02805 0.13710 0.80611 0.12443
  -2  -2  14   73.27    3.98   1 0.22179-0.21706 0.96008 0.87971 0.17040-0.42306
   2  -2 -14   59.71    6.47   1-0.44363-0.08892-0.83754-0.94153-0.31891 0.32495
   2  -2 -14   51.66    5.91   1-0.72129-0.36031-0.68000-0.78105-0.13161 0.51002
   2   2 -14   59.55    5.75   1-0.80616-0.36132-0.54974-0.46530 0.21882 0.80804
  -2   2  14   71.34    4.03   1-0.61589-0.97527 0.06103 0.16674 0.78546 0.14503
  -2  -2  13   12.72    3.95   1 0.18872-0.21827 0.97110 0.88752 0.14609-0.40577
   2  -2 -13   11.40    4.45   1-0.42909-0.10629-0.84904-0.94985-0.30822 0.29408
   2  -2 -13   16.22    3.05   1-0.73039-0.40169-0.67436-0.77248-0.10846 0.49183
   2   2 -13   16.67    2.90   1-0.80838-0.39581-0.52961-0.44226 0.25694 0.80481
  -2  -2  13   13.54    3.09   1-0.53254-0.94598-0.04425-0.12635 0.84524 0.29857
  -2   2  13   17.27    3.34   1-0.63957-0.96672 0.09414 0.19651 0.76294 0.16376
  -2  -2  12   10.63    2.76   1 0.15390-0.22125 0.98071 0.89393 0.12048-0.38977
   2  -2 -12   10.34    3.44   1-0.41560-0.12471-0.85923-0.95685-0.29830 0.26244
   2  -2 -12   12.77    3.22   1-0.73764-0.44124-0.66929-0.76449-0.08901 0.46994
   2   2 -12   16.17    3.82   1-0.80910-0.42881-0.50878-0.41851 0.29407 0.80060
  -2  -2  12    8.16    2.50   1-0.56037-0.94158-0.01076-0.09620 0.82817 0.32275
  -2   2  12   15.01    3.45   1-0.66220-0.95712 0.12753 0.22657 0.73838 0.18046
  -2   2  11    3.46    2.33   1 0.39357 0.13480 0.87008 0.96559 0.29672-0.22239
  -2  -2  11    6.71    2.48   1 0.11627-0.22611 0.98887 0.89813 0.09281-0.37712
   2  -2 -11    4.72    2.08   1-0.74306-0.47894-0.66513-0.75742-0.07384 0.44376
   2   2 -11    3.23    2.24   1-0.80838-0.46036-0.48726-0.39407 0.33029 0.79547
  -2  -2  11    4.95    2.22   1-0.58741-0.93639 0.02329-0.06547 0.80894 0.34478
  -2   2  11    9.55    2.56   1-0.68365-0.94670 0.16110 0.25637 0.71179 0.19499
  -2   2  10   -1.98    2.36   1 0.38308 0.15634 0.87733 0.96952 0.28901-0.18863
  -2  -2  10   -1.37    2.41   1 0.07639-0.23423 0.99505 0.90118 0.06349-0.36470
   2  -2 -10    0.38    2.41   1-0.74652-0.51469-0.66228-0.75165-0.06383 0.41243
   2   2 -10   -0.03    3.25   1-0.80624-0.49050-0.46502-0.36891 0.36567 0.78949
  -2  -2  10    1.73    2.12   1-0.61392-0.93067 0.05835-0.03374 0.78720 0.36428
  -2   2  10    0.59    2.45   1-0.70434-0.93513 0.19566 0.28765 0.68235 0.20681
  -2   2   9   11.64    2.56   1 0.37510 0.18021 0.88268 0.97167 0.28314-0.15289
  -2  -2   9   13.03    3.03   1 0.03290-0.24596 0.99896 0.90195 0.03150-0.35494
   2  -2  -9   10.49    2.39   1-0.74776-0.54821-0.66123-0.74768-0.06018 0.37474
   2   2  -9   14.48    2.53   1-0.80272-0.51925-0.44205-0.34302 0.40028 0.78275
  -2  -2   9   10.04    2.07   1-0.64020-0.92472 0.09504-0.00039 0.76230 0.38063
  -2   2   9   11.56    2.32   1-0.72407-0.92260 0.23119 0.31989 0.64982 0.21553
  -2   2   8   14.56    2.61   1 0.37048 0.20744 0.88571 0.97150 0.27974-0.11468
  -2  -2   8   13.99    2.87   1-0.01537-0.26248 0.99987 0.89972-0.00399-0.34870
   2  -2  -8   15.61    2.25   1-0.74623-0.57897-0.66253-0.74605-0.06466 0.32891
   2   2  -8   17.03    2.43   1-0.79780-0.54661-0.41829-0.31634 0.43420 0.77533
  -2  -2   8   11.03    1.87   1-0.66667-0.91896 0.13436 0.03559 0.73313 0.39271
  -2   2   8   14.10    2.49   1-0.74280-0.90908 0.26807 0.35348 0.61349 0.22047
  -2   2   7    2.72    1.99   1 0.37071 0.23953 0.88555 0.96814 0.27992-0.07290
  -2  -2   7   -0.99    2.48   1-0.07013-0.28548 0.99655 0.89326-0.04426-0.34722
   2  -2  -7   -2.74    2.11   1-0.74093-0.60596-0.66680-0.74741-0.07987 0.27236
   2   2  -7    1.43    2.51   1-0.79147-0.57255-0.39366-0.28880 0.46754 0.76731
  -2  -2   7    0.60    1.79   1-0.69385-0.91399 0.17783 0.07539 0.69780 0.39865
  -2   2   7    5.03    2.40   1-0.76043-0.89446 0.30679 0.38892 0.57237 0.22060
  -2   2   6   63.63    3.31   1 0.37827 0.27894 0.88057 0.95996 0.28547-0.02574
  -2  -2   6   59.32    3.24   1-0.13387-0.31746 0.98679 0.88037-0.09113-0.35235
   2  -2  -6   60.47    3.17   1-0.72996-0.62727-0.67464-0.75233-0.10958 0.20130
   2   2  -6   77.46    3.84   1-0.78365-0.59701-0.36805-0.26027 0.50041 0.75883
  -2  -2   6   70.89    3.32   1-0.72293-0.91082 0.22907 0.12334 0.65183 0.39394
  -2   2   6   66.21    3.92   1-0.77674-0.87852 0.34804 0.42688 0.52490 0.21440
  -2  -2   5    5.96    2.40   1-0.21020-0.36212 0.96650 0.85696-0.14725-0.36670
   2  -2  -5    4.72    1.77   1-0.70976-0.63936-0.68619-0.76095-0.15929 0.11026
   2   2  -5   -0.16    2.34   1-0.77425-0.61988-0.34126-0.23056 0.53298 0.75005
  -2  -2   5    4.89    1.94   1-0.75501-0.91064 0.29436 0.18534 0.58592 0.36928
  -2   2   5    5.97    2.32   1-0.79122-0.86074 0.39278 0.46833 0.46871 0.19946
  -2  -2   4   75.38    3.84   1-0.30476-0.42491 0.92742 0.81474-0.21679-0.39450
   2  -2  -4   77.73    3.66   1-0.44782-0.41219-0.83412-0.90626-0.32199-0.09371
   2  -2  -4   76.13    3.82   1-0.67357-0.63548-0.70017-0.77206-0.23673-0.00851
   2   2  -4   75.21    4.11   1-0.76304-0.64095-0.31296-0.19934 0.56551 0.74124
  -2  -2   4   79.37    3.44   1-0.79009-0.91346 0.38884 0.27653 0.47387 0.29850
  -2   2   4   71.06    3.79   1-0.80276-0.84003 0.44230 0.51457 0.39990 0.17192
  -2  -2   3   -2.40    2.63   1-0.42421-0.51259 0.85278 0.73696-0.30463-0.44060
   2  -2  -3    3.30    1.97   1-0.52356-0.51984-0.76369-0.83264-0.37769-0.19096
   2  -2  -3    7.08    2.50   1-0.60974-0.60393-0.71124-0.78021-0.34977-0.16290
   2   2  -3    4.18    2.11   1-0.74966-0.65985-0.28259-0.16605 0.59844 0.73281
  -2   2   3    3.76    2.40   1-0.80893-0.81407 0.49841 0.56715 0.31179 0.12498
  -2  -2   3    7.93    2.69   1-0.80659-0.89776 0.54679 0.43103 0.22455 0.09063
  -2  -2   2  654.24   10.46   1-0.57072-0.62758 0.71008 0.59121-0.41237-0.50656
   2  -2  -2  644.31   10.05   1-0.66217-0.69036-0.57574-0.64150-0.47962-0.33445
   2  -2  -2  644.75   10.08   1-0.50011-0.52658-0.70584-0.77193-0.50165-0.35612
   2   2  -2  665.09   10.50   1-0.73338-0.67584-0.24909-0.12963 0.63253 0.72555
  -2  -2   2  618.95    9.89   1-0.56887-0.62776 0.71212 0.59313-0.41141-0.50408
  -2  -2   1    7.75    2.28   1-0.72300-0.74821 0.44979 0.32776-0.52435-0.57683
   2  -2  -1   14.27    3.11   1-0.80797-0.86776-0.05295-0.11598-0.58683-0.48325
  -2   2   1    8.47    2.24   1-0.76390-0.70380-0.33023-0.26765-0.55442-0.65803
   2  -2  -1   10.25    2.61   1-0.32964-0.38838-0.66077-0.72395-0.67431-0.57013
   2   2  -1    9.11    2.33   1-0.71260-0.68733-0.21019-0.08781 0.66933 0.72101
   2   2  -1   10.15    3.02   1-0.11301-0.08604-0.42971-0.30772 0.89586 0.94757
  -2  -2   1   10.92    2.24   1-0.35309-0.37991-0.23192-0.35391 0.90638 0.85463
  -2   2   1    9.72    2.49   1-0.77328-0.71385 0.63355 0.69582 0.02530-0.07898
   2  -2   0  145.24    5.03   1-0.63030-0.72219 0.62818 0.56813-0.45618-0.39452
  -2  -2   0  146.54    4.66   1-0.80706-0.80047 0.07112-0.05414-0.58616-0.59691
   2  -2   0  154.68    4.72   1-0.10895-0.19996-0.55874-0.61912-0.82215-0.75940
   2   2   0  159.21    4.58   1-0.68308-0.69009-0.16017-0.03487 0.71255 0.72288
   2   2   0  154.81    4.44   1-0.43043-0.43580-0.15622-0.03084 0.88899 0.89951
  -2   2   0  160.13    4.74   1-0.68374-0.59202 0.69695 0.75600-0.21619-0.27923
   2  -2   1    7.54    2.10   1-0.37467-0.49840 0.88751 0.83059-0.26820-0.24840
  -2  -2  -1    4.82    2.67   1-0.77379-0.73553-0.29282-0.42128-0.56169-0.53057
   2  -2   1    7.72    2.22   1 0.11415-0.00905-0.41560-0.47310-0.90235-0.88096
   2   2   1    4.49    2.53   1-0.62934-0.66862-0.07963 0.04858 0.77303 0.74200
   2   2   1    7.28    2.39   1-0.54293-0.58070-0.03192 0.09685 0.83916 0.80833
  -2   2  -1    4.34    1.89   1-0.48436-0.36035 0.70327 0.75909-0.52038-0.54215
   2  -2   2  649.06   10.69   1-0.22222-0.37773 0.96241 0.90863-0.15610-0.17804
  -2  -2  -2  657.22   10.82   1-0.68454-0.61438-0.53414-0.66578-0.49607-0.42339
   2  -2   2  624.89    9.71   1 0.19954 0.04321-0.61726-0.66923 0.76103 0.74179
   2   2   2  631.17   10.22   1-0.58857-0.65857 0.02478 0.15690 0.80806 0.73597
   2  -2   3   -0.26    2.22   1-0.12683-0.31409 0.98819 0.93751-0.08595-0.14969
  -2  -2  -3    2.23    2.33   1-0.60170-0.49963-0.66976-0.80459-0.43515-0.32091
  -2  -2  -3   -0.06    1.54   1-0.36443-0.26046-0.67275-0.80679-0.64389-0.53031
   2   2   3   -0.57    1.27   1-0.80462-0.90845-0.45339-0.31934 0.38342 0.26970
  -2   2  -3    0.78    2.35   1-0.43951-0.25160 0.14686 0.19815 0.88614 0.94732
   2  -2   3    1.40    1.65   1-0.05042-0.23894-0.47336-0.52197 0.87942 0.81880
   2   2   3    0.02    2.52   1-0.60800-0.71023 0.05036 0.18581 0.79233 0.67899
   2  -2   4   43.13    3.09   1-0.05906-0.27808 0.99760 0.95006-0.03612-0.14160
  -2  -2  -4   47.31    3.03   1-0.54128-0.40730-0.74454-0.88256-0.39072-0.23492
  -2  -2  -4   40.81    3.16   1-0.68752-0.55128-0.69563-0.83260-0.20835-0.05342
  -2   2  -4   48.33    3.18   1-0.53911-0.31892 0.03648 0.08486 0.84144 0.94397
   2  -2   4   50.97    2.91   1-0.20831-0.42906-0.35723-0.40244 0.91048 0.80866
   2   2   4   45.83    2.93   1-0.61485-0.74931 0.05961 0.19840 0.78638 0.63179
   2  -2   5    4.74    2.12   1-0.00615-0.25692 0.99997 0.95557 0.00278-0.14444
  -2  -2  -5    3.34    2.56   1-0.50074-0.33485-0.78676-0.92796-0.36091-0.16355
  -2  -2  -5    2.01    1.58   1-0.75466-0.58612-0.65493-0.79482-0.03911 0.15719
  -2   2  -5    1.94    2.00   1-0.61135-0.35889-0.05487-0.00941 0.78945 0.93333
   2  -2   5    2.74    1.76   1-0.29984-0.55264-0.28031-0.32226 0.91187 0.76858
   2   2   5    0.30    1.97   1-0.61461-0.78130 0.05929 0.20141 0.78659 0.59075
   2  -2   6   46.34    3.26   1 0.03803-0.24450 0.99865 0.95739 0.03527-0.15369
  -2  -2  -6   55.55    3.47   1-0.47488-0.27708-0.81092-0.95531-0.34189-0.10298
  -2  -2  -6   47.59    3.00   1-0.77368-0.57285-0.63300-0.77581 0.02683 0.26449
  -2   2  -6   47.09    3.05   1-0.66466-0.37992-0.13127-0.08873 0.73552 0.92075
   2  -2   6   41.38    2.84   1-0.35054-0.63554-0.23430-0.27286 0.90676 0.72223
   2   2   6   51.91    3.33   1-0.60987-0.80879 0.05287 0.19832 0.79073 0.55364
   2  -2   7    5.72    2.43   1 0.07667-0.23761 0.99501 0.95689 0.06369-0.16701
  -2  -2  -7    9.77    2.01   1-0.45948-0.22977-0.82437-0.97195-0.33056-0.05009
  -2  -2  -7    7.47    2.08   1-0.77946-0.54634-0.62443-0.77016 0.05016 0.32916
  -2   2  -7    8.39    2.23   1-0.70471-0.38770-0.19630-0.15669 0.68178 0.90836
   2  -2   7    6.87    1.94   1-0.37806-0.69525-0.20822-0.24339 0.90205 0.67630
   2   2   7    4.34    2.49   1-0.60195-0.83309 0.04229 0.19107 0.79741 0.51907
   2  -2   8   86.10    4.29   1 0.11161-0.23444 0.98972 0.95473 0.08938-0.18307
  -2  -2  -8   89.56    4.06   1-0.45158-0.18996-0.83102-0.98178-0.32475-0.00273
  -2  -2  -8   94.25    4.33   1-0.77993-0.51453-0.62368-0.77233 0.05216 0.37250
  -2   2  -8   92.45    4.02   1-0.73522-0.38594-0.25272-0.21602 0.62894 0.89687
   2  -2   8   84.62    3.68   1-0.39130-0.74067-0.19538-0.22716 0.89928 0.63229
   2   2   8   89.44    4.48   1-0.59159-0.85497 0.02870 0.18082 0.80572 0.48613
   2  -2   9    0.45    1.92   1 0.14446-0.23399 0.98297 0.95158 0.11354-0.19931
  -2  -2  -9   -0.60    2.43   1-0.44915-0.15563-0.83303-0.98697-0.32297 0.04061
  -2  -2  -9   -1.37    1.77   1-0.77744-0.47975-0.62756-0.77912 0.04178 0.40347
  -2   2  -9    0.98    2.25   1-0.75859-0.37703-0.30251-0.26873 0.57707 0.88635
   2  -2   9   -0.92    1.98   1-0.39513-0.77670-0.19162-0.22001 0.89841 0.59018
   2   2   9    1.37    2.07   1-0.57925-0.87485 0.01283 0.16829 0.81504 0.45421
   2  -2  10   18.79    3.05   1 0.17484-0.23546 0.97517 0.94698 0.13588-0.21857
  -2  -2 -10   13.96    3.60   1-0.45080-0.12537-0.83166-0.98879-0.32419 0.08095
  -2  -2 -10   18.21    2.64   1-0.77278-0.44281-0.63423-0.78871 0.02339 0.42642
  -2   2 -10   20.52    2.77   1-0.77640-0.36257-0.34710-0.31624 0.52603 0.87665
   2  -2  10   14.66    2.66   1-0.39237-0.80613-0.19433-0.21933 0.89904 0.54958
   2   2  10   15.18    2.89   1-0.56518-0.89301-0.00482 0.15396 0.82494 0.42286
   2  -2  11    1.69    3.56   1 0.20378-0.23837 0.96631 0.94133 0.15716-0.23890
  -2  -2 -11    3.34    3.09   1-0.45555-0.09821-0.82770-0.98802-0.32768 0.11902
  -2  -2 -11   -1.81    2.15   1-0.76622-0.40396-0.64256-0.79997-0.00069 0.44367
  -2   2 -11    1.83    2.43   1-0.78971-0.34360-0.38754-0.35960 0.47555 0.86753
   2  -2  11    0.46    2.06   1-0.38468-0.83063-0.20182-0.22343 0.90071 0.51002
   2   2  11    2.17    2.58   1-0.54956-0.90963-0.02394 0.13817 0.83510 0.39176
   2  -2  12    9.38    3.58   1 0.23160-0.24241 0.95645 0.93466 0.17762-0.26005
  -2  -2 -12    8.91    2.93   1-0.46269-0.07345-0.82162-0.98512-0.33293 0.15533
  -2  -2 -12    6.08    2.30   1-0.75778-0.36324-0.65184-0.81217-0.02917 0.45653
  -2   2 -12   10.63    3.34   1-0.79922-0.32084-0.42458-0.39955 0.42539 0.85872
   2  -2  12    6.49    2.43   1-0.37310-0.85124-0.21298-0.23120 0.90301 0.47108
   2   2  12    7.03    3.75   1-0.53249-0.92478-0.04431 0.12114 0.84527 0.36068
   2  -2  13   -4.45    3.44   1 0.25852-0.24734 0.94561 0.92702 0.19742-0.28185
  -2  -2 -13    2.64    2.87   1-0.47172-0.05056-0.81374-0.98043-0.33956 0.19025
  -2   2 -13   -0.38    2.55   1-0.80541-0.29475-0.45876-0.43665 0.37529 0.84996
   2  -2  13   -2.41    2.90   1-0.35829-0.86862-0.22704-0.24187 0.90557 0.43242
   2   2  13    0.15    3.02   1-0.51402-0.93854-0.06575 0.10303 0.85525 0.32940
   2  -2  14   29.64    4.66   1 0.28473-0.25298 0.93379 0.91840 0.21669-0.30419
  -2  -2 -14   37.14    3.79   1-0.48223-0.02917-0.80425-0.97413-0.34730 0.22408
  -2   2 -14   29.70    3.87   1-0.80857-0.26564-0.49049-0.47131 0.32498 0.84100
   2  -2  14   25.82    3.59   1-0.34065-0.88317-0.24349-0.25493 0.90811 0.39372
   2   2  14   32.27    4.25   1-0.49418-0.95093-0.08816 0.08396 0.86487 0.29778
   2  -2  15    2.66    3.79   1 0.31035-0.25922 0.92097 0.90879 0.23553-0.32695
  -2  -2 -15    0.04    2.80   1-0.49395-0.00898-0.79330-0.96636-0.35591 0.25702
  -2   2 -15    4.17    3.92   1-0.80890-0.23369-0.52007-0.50380 0.27422 0.83160
   2   2  15    1.79    3.06   1-0.47358-0.96181-0.11077 0.06544 0.87375 0.26575
   2  -2  16   40.48    4.47   1 0.33548-0.26594 0.90715 0.89816 0.25400-0.35008
  -2  -2 -16   50.35    4.09   1-0.50665 0.01022-0.78095-0.95720-0.36525 0.28924
   2   2  16   24.28    4.22   1-0.45101-0.97143-0.13485 0.04475 0.88226 0.23303
   2  -2  17    4.81    4.28   1 0.36018-0.27309 0.89229 0.88650 0.27217-0.37352
  -2  -2 -17    3.16    5.35   1-0.52015 0.02863-0.76725-0.94668-0.37518 0.32087
   2   2  17    0.84    4.57   1-0.42699-0.97960-0.15973 0.02326 0.89003 0.19956
  -2  -4  17    0.07    4.33   1 0.23824-0.33852 0.95390 0.79044 0.18250-0.51049
   2  -4 -17    5.16    5.17   1-0.57534-0.16773-0.70436-0.91023-0.41576 0.37858
  -2   4  17    9.09    4.49   1-0.56553-0.97846-0.00438 0.20356 0.82471 0.03428
  -2  -4  16    9.02    4.44   1 0.20382-0.34108 0.96630 0.79964 0.15719-0.49419
   2  -4 -16    0.19    5.09   1-0.56523-0.18954-0.71677-0.91946-0.40833 0.34445
   2   4 -16   -0.15    4.55   1-0.80811-0.25668-0.53306-0.36179 0.25057 0.89622
  -2   4  16   -1.86    4.85   1-0.59038-0.97107 0.02712 0.23174 0.80666 0.05749
  -2  -4  15   -0.14    3.21   1 0.16801-0.34505 0.97706 0.80720 0.13086-0.47892
   2  -4 -15   -1.05    3.04   1-0.55634-0.21256-0.72735-0.92685-0.40179 0.30943
   2   4 -15    3.30    4.15   1-0.80910-0.28994-0.51006-0.33587 0.29187 0.89617
  -2   4  15    1.91    3.63   1-0.61396-0.96243 0.05841 0.25969 0.78716 0.07924
  -2  -4  14    4.82    3.05   1 0.13013-0.35003 0.98613 0.81213 0.10300-0.46680
   2  -4 -14    4.11    3.99   1-0.54892-0.23704-0.73593-0.93225-0.39634 0.27333
   2   4 -14   -1.22    3.42   1-0.80830-0.32142-0.48613-0.30902 0.33214 0.89509
  -2   4  14    7.93    4.48   1-0.63636-0.95259 0.08954 0.28749 0.76617 0.09949
  -2  -4  13    6.62    3.52   1 0.09068-0.35773 0.99312 0.81599 0.07399-0.45406
   2  -4 -13    1.50    3.75   1-0.54331-0.26334-0.74227-0.93541-0.39221 0.23590
   2  -4 -13   12.91    3.04   1-0.61340-0.32675-0.71095-0.90186-0.34391 0.28260
   2   4 -13    3.04    3.77   1-0.80575-0.35114-0.46125-0.28122 0.37148 0.89308
  -2   4  13   10.38    3.84   1-0.65761-0.94162 0.12061 0.31522 0.74363 0.11820
  -2  -4  12   -1.60    3.26   1 0.04889-0.36775 0.99786 0.81759 0.04326-0.44304
   2  -4 -12    2.77    2.96   1-0.53994-0.29188-0.74603-0.93598-0.38973 0.19682
   2  -4 -12    0.98    2.59   1-0.61692-0.36255-0.71065-0.89864-0.33819 0.24697
   2   4 -12   -4.47    4.02   1-0.80146-0.37913-0.43538-0.25243 0.40999 0.89024
  -2   4  12   -0.43    3.57   1-0.67757-0.92982 0.15137 0.34221 0.71970 0.13533
  -2  -4  11    3.75    2.61   1 0.00430-0.38058 0.99993 0.81653 0.01048-0.43408
   2  -4 -11    3.03    2.86   1-0.53937-0.32322-0.74666-0.93343-0.38931 0.15568
   2  -4 -11    0.57    2.20   1-0.61653-0.39444-0.71068-0.89576-0.33882 0.20500
   2   4 -11   -0.18    2.56   1-0.79542-0.40536-0.40845-0.22258 0.44774 0.88664
  -2   4  11    0.73    2.73   1-0.69668-0.91667 0.18258 0.37014 0.69374 0.15064
  -2  -4  10   13.53    3.50   1-0.04368-0.39681 0.99873 0.81219-0.02481-0.42763
   2  -4 -10    8.01    3.03   1-0.54233-0.35809-0.74337-0.92695-0.39149 0.11194
   2  -4 -10   11.85    2.58   1-0.61156-0.42174-0.71110-0.89326-0.34687 0.15561
   2   4 -10   11.67    3.10   1-0.78756-0.42978-0.38037-0.19159 0.48481 0.88237
  -2  -4  10    9.39    1.91   1-0.45971-0.81949-0.12566-0.30928 0.87913 0.48246
  -2   4  10   10.47    3.86   1-0.71474-0.90247 0.21403 0.39829 0.66583 0.16398
  -2  -4   9    3.28    2.23   1-0.09583-0.41721 0.99339 0.80371-0.06316-0.42424
   2  -4  -9   -1.05    2.67   1-0.54980-0.39746-0.73492-0.91531-0.39698 0.06489
   2  -4  -9    3.37    2.26   1-0.60092-0.44339-0.71177-0.89101-0.36367 0.09746
   2   4  -9    3.89    3.07   1-0.77782-0.45231-0.35103-0.15933 0.52130 0.87751
  -2  -4   9    4.47    1.66   1-0.47503-0.80263-0.10920-0.29621 0.87316 0.51772
  -2   4   9    2.13    2.03   1-0.73173-0.88721 0.24584 0.42683 0.63571 0.17512
  -2  -4   8   33.61    3.51   1-0.15308-0.44269 0.98259 0.78977-0.10525-0.42459
   2  -4  -8   36.25    3.57   1-0.56306-0.44263-0.71939-0.89659-0.40673 0.01358
   2  -4  -8   36.62    2.88   1-0.58305-0.45779-0.71226-0.88858-0.39080 0.02899
   2   4  -8   45.82    3.47   1-0.76605-0.47282-0.32026-0.12564 0.55730 0.87215
  -2  -4   8   30.02    2.28   1-0.48465-0.78005-0.09870-0.28910 0.86912 0.55491
  -2   4   8   36.35    3.15   1-0.74763-0.87085 0.27822 0.45591 0.60302 0.18369
  -2  -4   7    5.65    2.73   1-0.21639-0.47438 0.96442 0.76852-0.15181-0.42934
   2  -4  -7   -0.74    2.26   1-0.58377-0.49525-0.69365-0.86767-0.42196-0.04319
   2  -4  -7    0.21    1.84   1-0.55570-0.46272-0.71160-0.88500-0.42989-0.05143
   2   4  -7   -0.66    3.05   1-0.75207-0.49111-0.28784-0.09029 0.59289 0.86640
  -2  -4   7    0.80    1.39   1-0.48390-0.74712-0.09952-0.29331 0.86944 0.59647
  -2   4   7    0.32    2.31   1-0.76237-0.85335 0.31136 0.48578 0.56729 0.18922
  -2  -4   6   69.80    3.26   1-0.28731-0.51353 0.93586 0.73681-0.20396-0.43976
   2  -4  -6   74.14    3.78   1-0.61393-0.55732-0.65254-0.82337-0.44414-0.10694
   2  -4  -6   71.39    3.74   1-0.51584-0.45514-0.70801-0.87850-0.48230-0.14519
   2   4  -6   68.16    3.70   1-0.73559-0.50691-0.25346-0.05300 0.62821 0.86036
  -2  -4   6   64.14    2.87   1-0.45754-0.68856-0.12796-0.32514 0.87992 0.64819
  -2   4   6   67.19    3.37   1-0.77585-0.83457 0.34559 0.51671 0.52784 0.19102
  -2  -4   5    2.93    2.57   1-0.36689-0.56133 0.89246 0.69026-0.26248-0.45654
   2  -4  -5   -2.17    2.20   1-0.65547-0.63077-0.58737-0.75502-0.47469-0.17904
   2  -4  -5   -2.26    2.18   1-0.45968-0.43126-0.69851-0.86612-0.54842-0.25266
   2   4  -5    2.97    2.95   1-0.71622-0.51981-0.21670-0.01332 0.66337 0.85417
  -2   4   5    1.40    2.73   1-0.78784-0.81430 0.38126 0.54910 0.48367 0.18812
  -2  -4   4    1.14    2.05   1-0.45561-0.61828 0.82765 0.62231-0.32772-0.48004
   2  -4  -4    1.46    1.76   1-0.70849-0.71569-0.48391-0.64837-0.51367-0.25958
   2  -4  -4    0.65    1.59   1-0.38393-0.38779-0.67889-0.84359-0.62585-0.37144
   2   4  -4   -1.55    2.10   1-0.69334-0.52921-0.17698 0.02931 0.69853 0.84798
  -2   4   4   -0.99    2.36   1-0.79794-0.79215 0.41890 0.58345 0.43335 0.17906
  -2  -4   3    3.58    2.53   1-0.55134-0.68257 0.73316 0.52483-0.39811-0.50857
   2  -4  -3    6.32    2.06   1-0.76628-0.80539-0.32167-0.48295-0.55617-0.34364
   2  -4  -3    7.78    2.53   1-0.28678-0.32291-0.64436-0.80614-0.70890-0.49585
   2   4  -3    8.27    2.41   1-0.66608-0.53422-0.13345 0.07575 0.73383 0.84193
  -2   4   3    2.13    2.75   1-0.80549-0.76761 0.45932 0.62030 0.37444 0.16120
  -2  -4   2    0.38    2.33   1-0.64910-0.74849 0.59812 0.38660-0.47001-0.53878
   2  -4  -2    3.48    1.99   1-0.80615-0.87655-0.08546-0.24424-0.58549-0.41472
   2  -4  -2    4.69    2.31   1-0.16965-0.23806-0.59094-0.75002-0.78867-0.61708
   2   4  -2   -1.09    2.65   1-0.63306-0.53348-0.08487 0.12726 0.76942 0.83618
   2   4  -2    3.92    2.21   1-0.28923-0.18697-0.28962-0.07888 0.91239 0.97919
  -2   4   2   -0.08    2.44   1-0.80905-0.73888 0.50301 0.66077 0.30399 0.13200
  -2  -4   1   14.53    2.51   1-0.73501-0.80278 0.41889 0.20425-0.53318-0.56019
   2  -4  -1   10.53    2.09   1-0.79137-0.89375 0.20866 0.05309-0.57462-0.44539
   2  -4  -1   13.25    2.52   1-0.04185-0.14251-0.51974-0.67590-0.85329-0.72307
   2   4  -1   10.77    2.30   1-0.59210-0.52479-0.02936 0.18569 0.80532 0.83072
   2   4  -1   10.19    1.90   1-0.52932-0.45949-0.04803 0.16631 0.84705 0.87246
  -2   4   1   10.01    2.57   1-0.80597-0.70352 0.55096 0.70548 0.21643 0.08570
   2  -4   0   -0.65    2.22   1-0.70599-0.84038 0.48948 0.33690-0.51184-0.42455
  -2  -4   0   -0.04    2.21   1-0.79216-0.82816 0.20401-0.01378-0.57520-0.56031
   2  -4   0    5.17    2.92   1 0.08683-0.04601-0.43520-0.58844-0.89613-0.80723
   2   4   0   -1.64    2.13   1-0.53961-0.50458 0.03588 0.25386 0.84114 0.82519
   2   4   0    0.32    1.88   1-0.60771-0.57011 0.04997 0.26765 0.79258 0.77674
  -2   4   0   -2.54    2.30   1-0.79077-0.65603 0.60331 0.75460 0.10340 0.01392
   2  -4   1   67.83    3.30   1-0.58305-0.74932 0.69457 0.54507-0.42143-0.37604
  -2  -4  -1   67.77    3.61   1-0.80898-0.81299-0.01758-0.23859-0.58757-0.53113
   2  -4   1   67.65    3.58   1 0.20756 0.04248-0.34401-0.49436-0.91573-0.86821
   2   4   1   71.43    3.38   1-0.46965-0.46689 0.11502 0.33591 0.87532 0.81802
   2   4   1   60.72    3.01   1-0.63988-0.63451 0.09459 0.31560 0.76262 0.70553
  -2   4  -1   65.97    3.13   1-0.75221-0.58517 0.65726 0.80532-0.04675-0.09497
   2  -4   2   -1.95    2.33   1-0.46116-0.65918 0.82294 0.67650-0.33180-0.32835
  -2  -4  -2    0.08    2.24   1-0.79051-0.76318-0.21356-0.43753-0.57399-0.47551
  -2  -4  -2    0.94    1.83   1 0.35263 0.38252-0.21758-0.44141-0.91011-0.81168
   2  -4   2   -0.74    2.64   1 0.31439 0.11709-0.25286-0.40033-0.91499-0.90885
   2   4   2    2.02    2.30   1-0.65346-0.68032 0.11441 0.33876 0.74825 0.64991
  -2   4  -2   -0.07    1.79   1-0.67032-0.47100 0.70110 0.84593-0.24313-0.25009
   2  -4   3   21.67    2.58   1-0.35569-0.58548 0.89935 0.75605-0.25425-0.29254
  -2  -4  -3   22.42    2.98   1-0.75245-0.69320-0.36837-0.59553-0.54600-0.40595
  -2  -4  -3   19.68    2.27   1 0.21024 0.27232-0.34184-0.56866-0.91593-0.77618
   2   4   3   24.78    2.41   1-0.65775-0.71684 0.12081 0.34850 0.74347 0.60388
  -2   4  -3   19.34    2.28   1-0.52557-0.29397 0.70915 0.85075-0.46995-0.43565
   2  -4   4    6.47    1.99   1-0.26764-0.52920 0.94469 0.80454-0.18950-0.26953
  -2  -4  -4    7.30    2.45   1-0.70953-0.61838-0.48156-0.71190-0.51444-0.33284
  -2  -4  -4    3.79    1.62   1 0.02795 0.12227-0.47547-0.70530-0.87928-0.69827
  -2   4  -4    5.76    2.13   1-0.48542-0.22319 0.09785 0.23891 0.86878 0.94504
   2  -4   4    8.37    1.63   1 0.34546 0.08129-0.67698-0.81428 0.64987 0.57474
   2   4   4    8.99    2.21   1-0.65661-0.74793 0.11910 0.35012 0.74475 0.56392
   2  -4   5   13.25    2.84   1-0.19379-0.48713 0.97168 0.83467-0.13519-0.25696
  -2  -4  -5   16.85    2.55   1-0.67021-0.54715-0.56131-0.79484-0.48552-0.26236
  -2  -4  -5    9.91    1.83   1-0.16551-0.03895-0.58884-0.82159-0.79111-0.56873
  -2   4  -5   12.56    2.43   1-0.54862-0.25412 0.02508 0.16322 0.83569 0.95330
   2  -4   5   13.91    2.00   1 0.16493-0.13150-0.60031-0.73415 0.78257 0.66613
   2   4   5   12.79    2.12   1-0.65189-0.77544 0.11209 0.34644 0.74997 0.52788
   2  -4   6   14.35    2.76   1-0.13083-0.45586 0.98741 0.85347-0.08889-0.25249
  -2  -4  -6   13.26    2.85   1-0.63771-0.48274-0.61661-0.85333-0.46163-0.19691
  -2  -4  -6    9.58    1.78   1-0.32582-0.16697-0.65938-0.89495-0.67752-0.41373
  -2   4  -6   12.88    2.46   1-0.60116-0.27438-0.04125 0.09396 0.79806 0.95701
   2  -4   6   13.69    2.05   1 0.02584-0.30264-0.52245-0.65296 0.85227 0.69429
   2   4   6   11.26    2.75   1-0.64457-0.80035 0.10136 0.33905 0.75779 0.49445
   2  -4   7  179.51    5.82   1-0.07577-0.43256 0.99594 0.86515-0.04840-0.25375
  -2  -4  -7  187.37    6.43   1-0.61252-0.42564-0.65458-0.89448-0.44310-0.13682
  -2   4  -7  184.91    5.99   1-0.64486-0.28581-0.10177 0.03051 0.75749 0.95779
   2  -4   7  193.70    6.07   1-0.06818-0.42891-0.46128-0.58839 0.88462 0.68543
   2   4   7  185.95    5.69   1-0.63521-0.82321 0.08791 0.32893 0.76731 0.46272
   2  -4   8   -0.86    2.26   1-0.02673-0.41528 0.99956 0.87190-0.01234-0.25943
  -2  -4  -8    2.41    2.95   1-0.59397-0.37519-0.68025-0.92334-0.42947-0.08163
  -2  -4  -8    0.63    1.44   1-0.50457-0.28118-0.70650-0.94789-0.49624-0.14975
  -2   4  -8    1.79    2.47   1-0.68122-0.28990-0.15719-0.02781 0.71499 0.95665
   2  -4   8    0.80    1.73   1-0.12900-0.52196-0.41806-0.54177 0.89920 0.65881
   2   4   8    1.80    2.44   1-0.62413-0.84437 0.07236 0.31672 0.77795 0.43211
   2  -4   9   39.50    3.01   1 0.01772-0.40259 0.99963 0.87511 0.02034-0.26849
  -2  -4  -9   45.91    3.49   1-0.58111-0.33042-0.69705-0.94333-0.42001-0.03061
  -2   4  -9   45.44    3.19   1-0.71147-0.28787-0.20817-0.08171 0.67117 0.95417
   2  -4   9   42.86    2.93   1-0.16665-0.59184-0.38982-0.51014 0.90568 0.62407
   2   4   9   47.92    3.87   1-0.61156-0.86402 0.05515 0.30284 0.78927 0.40218
   2  -4  10    0.42    2.64   1 0.05863-0.39344 0.99700 0.87562 0.05042-0.28015
  -2  -4 -10    0.21    3.54   1-0.57298-0.29038-0.70729-0.95676-0.41402 0.01692
  -2   4 -10    0.83    2.44   1-0.73653-0.28065-0.25532-0.13178 0.62636 0.95071
   2  -4  10   -2.43    1.60   1-0.18819-0.64561-0.37315-0.49006 0.90847 0.58566
   2   4  10    1.27    2.26   1-0.59760-0.88229 0.03656 0.28758 0.80095 0.37261
   2  -4  11    0.22    3.40   1 0.09675-0.38707 0.99220 0.87396 0.07846-0.29386
  -2  -4 -11    4.77    2.91   1-0.56873-0.25422-0.71253-0.96518-0.41090 0.06160
  -2   4 -11    6.81    2.58   1-0.75712-0.26897-0.29914-0.17852 0.58075 0.94645
   2  -4  11    4.08    2.05   1-0.19819-0.68786-0.36528-0.47879 0.90955 0.54553
   2   4  11    3.70    3.80   1-0.58236-0.89928 0.01680 0.27116 0.81275 0.34316
   2  -4  12    2.97    3.43   1 0.13307-0.38329 0.98550 0.87103 0.10517-0.30720
  -2  -4 -12   -0.97    2.78   1-0.56767-0.22125-0.71382-0.96966-0.41012 0.10394
  -2   4 -12   -2.04    3.56   1-0.77380-0.25337-0.34005-0.22235 0.53441 0.94146
   2   4  12   -0.35    3.09   1-0.56586-0.91501-0.00397 0.25371 0.82448 0.31364
   2  -4  13    6.66    2.73   1 0.16716-0.38105 0.97728 0.86601 0.13023-0.32374
  -2  -4 -13   11.26    3.28   1-0.56923-0.19091-0.71191-0.97093-0.41127 0.14435
  -2   4 -13   13.35    3.17   1-0.78696-0.23426-0.37840-0.26362 0.48734 0.93574
   2   4  13   10.10    2.98   1-0.54814-0.92952-0.02567 0.23536 0.83599 0.28389
   2  -4  14    9.14    3.31   1 0.19977-0.38029 0.96762 0.85955 0.15421-0.34136
  -2  -4 -14    2.54    4.43   1-0.57297-0.16273-0.70731-0.96951-0.41402 0.18316
  -2   4 -14    8.03    3.99   1-0.79690-0.21193-0.41446-0.30260 0.43950 0.92925
   2   4  14    7.29    3.15   1-0.52918-0.94279-0.04819 0.21616 0.84713 0.25379
   2  -4  15   -9.57    4.47   1 0.23115-0.38077 0.95662 0.85175 0.17729-0.35989
  -2  -4 -15   -0.30    3.47   1-0.57850-0.13636-0.70038-0.96577-0.41809 0.22065
  -2   4 -15    0.98    3.10   1-0.80383-0.18658-0.44847-0.33952 0.39079 0.92190
   2   4  15   10.69    3.85   1-0.50898-0.95482-0.07150 0.19619 0.85779 0.22320
   2  -4  16    9.39    4.83   1 0.26150-0.38227 0.94433 0.84266 0.19961-0.37918
  -2  -4 -16    3.96    3.93   1-0.58553-0.11148-0.69136-0.95994-0.42326 0.25703
   2   4  16   14.51    5.85   1-0.48750-0.96557-0.09556 0.17547 0.86787 0.19203
   2  -4  17    2.90    4.30   1 0.29098-0.38465 0.93078 0.83231 0.22128-0.39911
  -2  -4 -17   -5.69    5.08   1-0.59382-0.08787-0.68045-0.95221-0.42936 0.29250
   2   4  17    1.52    5.62   1-0.46536-0.97473-0.11963 0.15550 0.87699 0.16034
  -2  -6  16    0.22    4.61   1 0.13558-0.45168 0.98496 0.72562 0.10701-0.51907
   2  -6 -16    4.79    4.99   1-0.64657-0.31371-0.60230-0.89733-0.46814 0.31044
   2   6 -16    3.56    3.38   1-0.80832-0.21485-0.48647-0.22253 0.33157 0.95095
  -2   6  16    4.16    4.56   1-0.60261-0.94016 0.04317 0.34003 0.79686 0.02143
  -2  -6  15   18.96    4.17   1 0.09581-0.45861 0.99235 0.72883 0.07777-0.50840
   2  -6 -15   15.80    3.68   1-0.64326-0.34230-0.60772-0.89955-0.46571 0.27132
   2   6 -15   10.58    3.88   1-0.80571-0.24451-0.46091-0.19405 0.37200 0.95003
  -2   6  15   16.03    4.47   1-0.62424-0.92957 0.07252 0.36604 0.77785 0.04367
  -2  -6  14   -0.43    3.42   1 0.05461-0.46805 0.99737 0.73071 0.04747-0.49696
   2  -6 -14    5.89    3.10   1-0.64178-0.37273-0.61010-0.89876-0.46462 0.23085
   2   6 -14   -4.83    3.78   1-0.80128-0.27236-0.43446-0.16467 0.41132 0.94799
  -2   6  14    7.23    3.70   1-0.64470-0.91779 0.10154 0.39173 0.75765 0.06472
  -2  -6  13   16.32    4.49   1 0.01140-0.47950 0.99981 0.73001 0.01570-0.48698
   2  -6 -13   17.48    3.54   1-0.64247-0.40533-0.60899-0.89446-0.46513 0.18878
   2   6 -13   15.21    3.46   1-0.79507-0.29842-0.40708-0.13438 0.44959 0.94492
  -2   6  13   11.82    4.68   1-0.66402-0.90489 0.13030 0.41715 0.73626 0.08459
  -2  -6  12    6.18    3.18   1-0.03409-0.49324 0.99926 0.72632-0.01775-0.47870
   2  -6 -12    5.69    3.43   1-0.64571-0.44048-0.60371-0.88599-0.46751 0.14484
   2  -6 -12    1.20    1.95   1-0.43604-0.22366-0.69316-0.97394-0.57393 0.03743
   2   6 -12    5.93    2.61   1-0.78707-0.32269-0.37876-0.10313 0.48688 0.94086
  -2   6  12    5.65    3.21   1-0.68204-0.89123 0.15850 0.44162 0.71392 0.10325
  -2  -6  11    2.79    2.61   1-0.08224-0.50964 0.99519 0.71912-0.05316-0.47236
   2  -6 -11    0.37    2.56   1-0.65195-0.47863-0.59335-0.87244-0.47210 0.09870
   2  -6 -11    0.12    2.45   1-0.42731-0.24720-0.69100-0.96887-0.58302-0.01300
   2   6 -11   -0.61    3.57   1-0.77724-0.34515-0.34943-0.07089 0.52323 0.93586
  -2   6  11    2.84    2.56   1-0.69921-0.87615 0.18685 0.46669 0.69006 0.12064
  -2  -6  10    1.81    3.24   1-0.13344-0.52907 0.98688 0.70767-0.09081-0.46826
   2  -6 -10   -3.65    2.50   1-0.66167-0.52025-0.57663-0.85254-0.47924 0.04999
   2  -6 -10    2.64    2.40   1-0.41199-0.26415-0.68698-0.96194-0.59859-0.06991
   2   6 -10    3.40    4.35   1-0.76556-0.36573-0.31904-0.03758 0.55868 0.92995
  -2   6  10   -0.73    3.59   1-0.71532-0.86000 0.21507 0.49163 0.66487 0.13671
  -2  -6   9   -3.75    3.00   1-0.18794-0.55199 0.97341 0.69113-0.13089-0.46651
   2  -6  -9   -0.05    2.21   1-0.67535-0.56585-0.55178-0.82450-0.48931-0.00162
   2  -6  -9   -1.76    2.12   1-0.38918-0.27361-0.68047-0.95252-0.62087-0.13354
   2   6  -9    1.51    2.57   1-0.75193-0.38438-0.28751-0.00314 0.59324 0.92316
  -2   6   9   -2.04    2.37   1-0.73037-0.84280 0.24322 0.51648 0.63827 0.15137
  -2  -6   8    1.82    2.10   1-0.24646-0.57874 0.95341 0.66799-0.17392-0.46781
   2  -6  -8   -0.25    2.49   1-0.69340-0.61580-0.51633-0.78587-0.50258-0.05645
   2  -6  -8    1.00    2.16   1-0.35786-0.27456-0.67058-0.93971-0.64980-0.20382
   2   6  -8    6.24    2.46   1-0.73624-0.40097-0.25475 0.03254 0.62693 0.91551
  -2   6   8    8.20    3.48   1-0.74438-0.82455 0.27136 0.54133 0.61013 0.16449
  -2  -6   7    0.60    2.46   1-0.30920-0.60970 0.92518 0.63661-0.22006-0.47220
   2  -6  -7    2.53    2.95   1-0.71587-0.67018-0.46694-0.73329-0.51911-0.11454
   2  -6  -7    0.55    2.16   1-0.31704-0.26601-0.65613-0.92235-0.68481-0.28018
   2   6  -7   -1.26    2.39   1-0.71836-0.41536-0.22061 0.06960 0.65975 0.90698
  -2   6   7    2.51    2.76   1-0.75731-0.80523 0.29957 0.56626 0.58028 0.17590
  -2  -6   6   -1.70    1.93   1-0.37628-0.64502 0.88647 0.59476-0.26939-0.47979
   2  -6  -6   -1.03    1.61   1-0.74211-0.72833-0.39923-0.66239-0.53840-0.17539
   2  -6  -6    0.50    1.92   1-0.26599-0.24723-0.63576-0.89906-0.72460-0.36131
   2   6  -6   -2.10    1.90   1-0.69809-0.42737-0.18496 0.10817 0.69170 0.89758
  -2   6   6   -4.01    2.70   1-0.76914-0.78480 0.32795 0.59136 0.54851 0.18539
  -2  -6   5    4.98    2.59   1-0.44740-0.68436 0.83447 0.53961-0.32168-0.49035
   2  -6  -5    1.83    2.08   1-0.76994-0.78807-0.30798-0.56796-0.55886-0.23741
   2  -6  -5   -2.72    1.80   1-0.20365-0.21723-0.60767-0.86835-0.76762-0.44584
   2   6  -5    1.33    2.16   1-0.67519-0.43674-0.14760 0.14845 0.72272 0.88725
  -2   6   5    5.01    2.37   1-0.77980-0.76321 0.35664 0.61676 0.51450 0.19264
  -2  -6   4   27.45    3.12   1-0.52095-0.72655 0.76642 0.46864-0.37576-0.50248
   2  -6  -4   36.13    3.24   1-0.79468-0.84472-0.18832-0.44512-0.57706-0.29716
   2  -6  -4   29.21    2.75   1-0.13275-0.17857-0.57172-0.82948-0.80963-0.52921
   2   6  -4   35.44    3.33   1-0.64933-0.44315-0.10830 0.19066 0.75275 0.87593
  -2   6   4   31.57    2.96   1-0.78919-0.74035 0.38579 0.64262 0.47783 0.19723
  -2  -6   3    4.28    2.30   1-0.59553-0.76930 0.67815 0.37718-0.43061-0.51566
   2  -6  -3    2.15    2.31   1-0.80845-0.88945-0.04028-0.29481-0.58718-0.34922
   2  -6  -3    2.92    2.35   1-0.05434-0.13239-0.52726-0.78210-0.84795-0.60891
   2   6  -3    4.42    2.49   1-0.62010-0.44620-0.06679 0.23509 0.78166 0.86349
   2   6  -3    3.26    2.11   1-0.28261-0.10492-0.29537 0.00411 0.91262 0.99447
  -2   6   3    2.62    2.62   1-0.79718-0.71608 0.41563 0.66917 0.43789 0.19855
  -2  -6   2   15.44    2.83   1-0.66648-0.80839 0.56808 0.26392-0.48278-0.52615
   2  -6  -2   13.59    2.26   1-0.80192-0.91491 0.13319-0.11811-0.58238-0.38597
   2  -6  -2   13.42    2.42   1 0.02865-0.08163-0.47501-0.72693-0.87951-0.68183
   2   6  -2   11.62    2.74   1-0.58698-0.44536-0.02273 0.28207 0.80927 0.84975
   2   6  -2   11.46    1.75   1-0.52856-0.38336-0.04892 0.25432 0.84748 0.88789
  -2   6   2   15.56    2.60   1-0.80353-0.69035 0.44668 0.69669 0.39344 0.19502
  -2  -6   1   19.67    3.06   1-0.72791-0.83825 0.43748 0.13023-0.52796-0.52950
   2  -6  -1   18.35    2.64   1-0.76769-0.91273 0.31646 0.06805-0.55721-0.40284
   2  -6  -1   24.58    2.88   1 0.11258-0.02989-0.41674-0.66570-0.90202-0.74561
   2   6  -1   21.52    2.59   1-0.54931-0.43995 0.02425 0.33199 0.83526 0.83439
   2   6  -1   20.55    2.22   1-0.60978-0.49680 0.05275 0.35934 0.79080 0.78996
  -2   6   1   22.45    2.67   1-0.80773-0.66225 0.47886 0.72563 0.34389 0.18672
   2  -6   0   88.37    3.90   1-0.70713-0.88409 0.48695 0.24176-0.51267-0.39991
  -2  -6   0   95.92    3.98   1-0.77430-0.85271 0.29074-0.01972-0.56207-0.52199
   2  -6   0   93.79    4.08   1 0.19500 0.02029-0.35405-0.60013-0.91466-0.79963
   2   6   0   86.49    3.60   1-0.50624-0.42917 0.07461 0.38526 0.85915 0.81693
   2   6   0   92.86    3.65   1-0.64543-0.56469 0.10261 0.41253 0.75689 0.71479
  -2   6   0   91.34    4.05   1-0.80908-0.63131 0.51288 0.75642 0.28694 0.17103
   2  -6   1    1.03    2.02   1-0.62875-0.83755 0.63055 0.38840-0.45504-0.38424
  -2  -6  -1   -0.39    2.12   1-0.80142-0.84803 0.13776-0.17578-0.58201-0.49993
   2  -6   1    1.15    2.93   1 0.27306 0.06612-0.28937-0.53257-0.91744-0.84379
   2   6   1   -0.52    2.13   1-0.45682-0.41202 0.12872 0.44229 0.88019 0.79662
   2   6   1    0.98    2.08   1-0.66220-0.61369 0.12753 0.44079 0.73838 0.65504
  -2   6  -1   -1.64    1.67   1-0.80622-0.59617 0.54936 0.78966 0.21956 0.14491
   2  -6   2   25.54    2.62   1-0.54357-0.78421 0.74199 0.50303-0.39240-0.36327
  -2  -6  -2   27.81    2.70   1-0.80907-0.82369-0.00914-0.32591-0.58763-0.46401
  -2  -6  -2   26.21    2.37   1 0.38425 0.37229-0.18723-0.50385-0.90404-0.77943
   2  -6   2   25.88    2.80   1 0.34520 0.10604-0.22455-0.46486-0.91126-0.87900
   2   6   2   32.51    2.82   1-0.66933-0.65305 0.13846 0.45505 0.72994 0.60535
  -2   6  -2   25.44    2.25   1-0.79657-0.55423 0.58880 0.82588 0.13705 0.10366
   2  -6   3    1.39    2.12   1-0.45975-0.73206 0.82414 0.58818-0.33077-0.34367
  -2  -6  -3    2.70    2.76   1-0.80117-0.78476-0.13997-0.45946-0.58183-0.41598
  -2  -6  -3   -1.12    2.29   1 0.31624 0.33647-0.25119-0.57085-0.91481-0.74893
  -2   6  -3    4.22    2.52   1-0.41605-0.14406 0.17082 0.40746 0.89314 0.90178
   2   6   3   -1.40    2.56   1-0.67078-0.68672 0.14070 0.46062 0.72818 0.56234
  -2   6  -3    0.43    1.42   1-0.77515-0.50052 0.63092 0.86477 0.03259 0.04046
   2  -6   4   14.71    2.84   1-0.38115-0.68523 0.88329 0.65048-0.27296-0.32760
  -2  -6  -4   15.87    2.28   1-0.78327-0.73495-0.25120-0.57388-0.56866-0.36125
  -2  -6  -4   15.48    2.30   1 0.23866 0.29111-0.31854-0.64109-0.91736-0.71010
  -2   6  -4   13.05    2.50   1-0.47414-0.16987 0.11017 0.34390 0.87352 0.92351
   2   6   4   17.16    2.58   1-0.66847-0.71664 0.13712 0.46038 0.73098 0.52389
  -2   6  -4   13.99    1.99   1-0.73314-0.42622 0.67250 0.90311-0.10119-0.05207
   2  -6   5    1.70    2.76   1-0.30923-0.64508 0.92516 0.69550-0.22008-0.31646
  -2  -6  -5    1.69    2.82   1-0.76075-0.68052-0.34121-0.66707-0.55211-0.30314
  -2  -6  -5    1.87    1.80   1 0.15361 0.23828-0.38623-0.71166-0.90951-0.66087
  -2   6  -5    1.16    2.03   1-0.52590-0.18935 0.05203 0.28284 0.84895 0.94028
   2   6   5   -0.19    2.79   1-0.66345-0.74385 0.12942 0.45602 0.73694 0.48859
  -2   6  -5    0.14    1.49   1-0.65933-0.32012 0.70391 0.93129-0.26416-0.17378
   2  -6   6    6.93    2.36   1-0.24391-0.61153 0.95441 0.72788-0.17205-0.31016
  -2  -6  -6    5.32    2.22   1-0.73758-0.62544-0.41190-0.74095-0.53507-0.24454
  -2  -6  -6    2.97    1.67   1 0.06512 0.18202-0.45036-0.77868-0.89046-0.60043
  -2   6  -6    6.30    2.45   1-0.57175-0.20293-0.00336 0.22452 0.82042 0.95310
   2   6   6    2.27    2.38   1-0.65631-0.76894 0.11866 0.44859 0.74509 0.45550
  -2   6  -6    1.52    1.51   1-0.55158-0.18008 0.71137 0.93552-0.43555-0.30391
  -2  -6  -7   43.87    4.00   1-0.71616-0.57211-0.46627-0.79851-0.51932-0.18723
  -2  -6  -7   30.12    2.64   1-0.01908 0.13007-0.50572-0.83715-0.86248-0.53127
  -2   6  -7   40.13    3.99   1-0.61220-0.21111-0.05601 0.16895 0.78871 0.96275
   2   6   7   39.02    3.50   1-0.64744-0.79229 0.10553 0.43879 0.75477 0.42393
   2  -6   8   25.50    3.40   1-0.13034-0.56140 0.98750 0.76718-0.08853-0.31025
  -2  -6  -8   27.15    2.91   1-0.69769-0.52174-0.50739-0.84281-0.50573-0.13209
  -2   6  -8   31.58    3.55   1-0.64774-0.21438-0.10598 0.11606 0.75444 0.96982
   2   6   8   26.38    3.44   1-0.63704-0.81413 0.09051 0.42711 0.76549 0.39340
   2  -6   9   20.23    2.85   1-0.08031-0.54312 0.99542 0.77824-0.05174-0.31520
  -2  -6  -9   23.83    2.93   1-0.68261-0.47475-0.53791-0.87652-0.49465-0.07945
  -2   6  -9   18.29    3.45   1-0.67886-0.21322-0.15341 0.06571 0.71805 0.97479
   2   6   9   23.49    2.78   1-0.62527-0.83458 0.07393 0.41387 0.77689 0.36355
   2  -6  10   28.39    4.13   1-0.03384-0.52842 0.99927 0.78522-0.01757-0.32278
  -2  -6 -10   30.91    3.82   1-0.67092-0.43115-0.56000-0.90180-0.48605-0.02929
  -2   6 -10   30.00    3.50   1-0.70596-0.20804-0.19846 0.01774 0.67987 0.97795
   2   6  10   29.19    3.87   1-0.61222-0.85377 0.05604 0.39931 0.78869 0.33410
   2  -6  11    5.69    3.82   1 0.00963-0.51670 0.99984 0.78893 0.01439-0.33255
  -2  -6 -11    3.47    3.70   1-0.66240-0.39072-0.57533-0.92031-0.47979 0.01852
  -2   6 -11    0.66    3.11   1-0.72938-0.19920-0.24131-0.02801 0.64012 0.97955
   2   6  11    2.61    2.84   1-0.59795-0.87173 0.03701 0.38361 0.80067 0.30483
   2  -6  12    3.38    3.56   1 0.05062-0.50747 0.99772 0.78995 0.04453-0.34416
  -2  -6 -12    3.03    3.17   1-0.65675-0.35316-0.58518-0.93335-0.47563 0.06424
  -2   6 -12   -0.81    4.51   1-0.74944-0.18697-0.28210-0.07173 0.59895 0.97974
   2   6  12    3.57    3.92   1-0.58250-0.88850 0.01697 0.36691 0.81265 0.27555
   2  -6  13    3.16    3.66   1 0.08951-0.50034 0.99329 0.78865 0.07313-0.35730
  -2  -6 -13    7.57    3.63   1-0.65364-0.31814-0.59050-0.94186-0.47334 0.10809
  -2   6 -13    7.95    4.17   1-0.76635-0.17161-0.32100-0.11354 0.55646 0.97859
   2   6  13    1.28    3.29   1-0.56587-0.90410-0.00397 0.34929 0.82448 0.24614
   2  -6  14   15.87    3.44   1 0.12662-0.49498 0.98685 0.78535 0.10042-0.37175
  -2  -6 -14   16.79    4.03   1-0.65274-0.28533-0.59202-0.94656-0.47268 0.15030
  -2   6 -14   15.60    4.11   1-0.78031-0.15330-0.35813-0.15359 0.51268 0.97617
   2   6  14   15.87    3.27   1-0.54806-0.91852-0.02576 0.33084 0.83603 0.21644
   2  -6  15   -3.99    4.13   1 0.16253-0.49175 0.97851 0.78096 0.12683-0.38506
  -2  -6 -15    6.08    5.11   1-0.65377-0.25445-0.59028-0.94801-0.47343 0.19111
  -2   6 -15    0.25    4.48   1-0.79145-0.13216-0.39360-0.19198 0.46762 0.97245
   2   6  15   -1.72    3.87   1-0.52906-0.93176-0.04833 0.31159 0.84720 0.18635
   2  -6  16    5.34    3.27   1 0.19683-0.48930 0.96857 0.77422 0.15205-0.40145
  -2  -6 -16    7.56    4.38   1-0.65646-0.22524-0.58568-0.94659-0.47541 0.23069
  -2   6 -16    7.26    3.98   1-0.79986-0.10829-0.42752-0.22882 0.42124 0.96742
   2   6  16    3.89    4.46   1-0.50884-0.94376-0.07166 0.29160 0.85786 0.15577
  -2  -8  15   -4.04    4.29   1 0.03869-0.55823 0.99861 0.64241 0.03576-0.52503
   2  -8 -15   -0.48    5.20   1-0.71394-0.45581-0.47147-0.85564-0.51768 0.24516
   2   8 -15   -2.22    4.89   1-0.79900-0.19577-0.42358-0.06404 0.42680 0.97855
  -2   8  15    2.03    4.00   1-0.62554-0.88772 0.07432 0.46008 0.77663 0.01620
  -2  -8  14   -3.57    4.62   1-0.00436-0.56954 0.99998 0.64065 0.00410-0.51496
   2  -8 -14    0.23    4.33   1-0.71576-0.48954-0.46721-0.84819-0.51902 0.20225
   2   8 -14    2.79    4.18   1-0.79216-0.22120-0.39616-0.03370 0.46423 0.97464
  -2   8  14   -1.14    4.14   1-0.64446-0.87441 0.10120 0.48362 0.75790 0.03872
  -2  -8  13   -0.92    4.05   1-0.04917-0.58259 0.99837 0.63590-0.02885-0.50616
   2  -8 -13   -0.69    3.63   1-0.71946-0.52515-0.45841-0.83621-0.52174 0.15798
   2   8 -13    3.74    3.48   1-0.78364-0.24495-0.36800-0.00262 0.50047 0.96953
  -2   8  13    1.59    4.57   1-0.66227-0.85999 0.12763 0.50672 0.73831 0.06038
  -2  -8  12   -3.74    3.17   1-0.09592-0.59757 0.99337 0.62777-0.06322-0.49879
   2  -8 -12    4.61    3.33   1-0.72520-0.56280-0.44432-0.81893-0.52597 0.11219
   2   8 -12   -0.11    4.78   1-0.77344-0.26702-0.33909 0.02920 0.53554 0.96324
  -2   8  12   -2.13    4.52   1-0.67878-0.84491 0.15328 0.52869 0.71816 0.08118
  -2  -8  11   -1.32    3.51   1-0.14478-0.61467 0.98448 0.61574-0.09915-0.49298
   2  -8 -11   -0.15    3.65   1-0.73311-0.60262-0.42396-0.79538-0.53178 0.06482
   2   8 -11   -2.32    2.87   1-0.76156-0.28742-0.30943 0.06178 0.56945 0.95580
  -2   8  11   -0.58    3.79   1-0.69447-0.82835 0.17886 0.55098 0.69693 0.10121
  -2  -8  10    5.49    3.93   1-0.19578-0.63411 0.97107 0.59927-0.13665-0.48862
   2  -8 -10    4.09    2.87   1-0.74321-0.64462-0.39609-0.76433-0.53920 0.01584
   2  -8 -10    4.49    2.56   1-0.19533-0.08958-0.60366-0.97178-0.77293-0.21820
   2   8 -10    2.72    3.54   1-0.74799-0.30612-0.27899 0.09514 0.60221 0.94722
  -2   8  10    4.87    3.58   1-0.70912-0.81075 0.20402 0.57285 0.67491 0.12045
  -2  -8   9    9.91    2.81   1-0.24934-0.65590 0.95227 0.57733-0.17604-0.48627
   2  -8  -9    8.06    2.83   1-0.75533-0.68865-0.35920-0.72425-0.54812-0.03463
   2  -8  -9    7.46    2.83   1-0.17055-0.09704-0.59140-0.95659-0.78813-0.27477
   2   8  -9    9.26    3.19   1-0.73271-0.32312-0.24777 0.12928 0.63382 0.93748
  -2   8   9    9.75    3.55   1-0.72277-0.79214 0.22876 0.59431 0.65212 0.13892
  -2  -8   8    7.80    3.41   1-0.30536-0.68015 0.92712 0.54903-0.21724-0.48573
   2  -8  -8    2.89    2.80   1-0.76901-0.73425-0.31151-0.67337-0.55818-0.08625
   2  -8  -8    1.08    2.27   1-0.13917-0.09791-0.57514-0.93742-0.80612-0.33413
   2   8  -8    1.81    4.12   1-0.71568-0.33837-0.21574 0.16423 0.66426 0.92657
  -2   8   8   -4.51    2.93   1-0.73541-0.77253 0.25308 0.61535 0.62858 0.15663
  -2  -8   7   11.34    2.41   1-0.36375-0.70677 0.89442 0.51319-0.26017-0.48693
   2  -8  -7   12.26    2.25   1-0.78330-0.78044-0.25105-0.60973-0.56869-0.13831
   2  -8  -7   11.03    2.38   1-0.10137-0.09234-0.55451-0.91387-0.82597-0.39535
   2   8  -7    9.49    2.64   1-0.69686-0.35182-0.18288 0.20000 0.69349 0.91444
  -2   8   7   10.77    3.24   1-0.74705-0.75192 0.27700 0.63597 0.60429 0.17360
  -2  -8   6    6.03    2.58   1-0.42416-0.73540 0.85282 0.46845-0.30459-0.48961
   2  -8  -6    0.65    2.32   1-0.79653-0.82557-0.17598-0.53148-0.57841-0.18959
   2  -8  -6    2.96    2.52   1-0.05757-0.08078-0.52919-0.88563-0.84654-0.45729
   2   8  -6    4.70    2.46   1-0.67619-0.36342-0.14918 0.23662 0.72146 0.90107
  -2   8   6    1.20    2.37   1-0.75771-0.73032 0.30049 0.65618 0.57928 0.18985
  -2  -8   5    6.65    3.14   1-0.48543-0.76541 0.80131 0.41406-0.34965-0.49263
   2  -8  -5   13.11    3.18   1-0.80608-0.86570-0.08644-0.43993-0.58544-0.23876
   2  -8  -5    7.47    2.69   1-0.00851-0.06397-0.49906-0.85259-0.86651-0.51863
   2   8  -5   18.03    3.17   1-0.65360-0.37311-0.11461 0.27411 0.74811 0.88636
  -2   8   5    9.97    2.56   1-0.76738-0.70774 0.32354 0.67595 0.55356 0.20539
  -2  -8   4    2.25    2.43   1-0.54740-0.79554 0.73766 0.34722-0.39522-0.49653
   2  -8  -4    1.39    3.20   1-0.80894-0.90055 0.01975-0.33052-0.58754-0.28240
   2  -8  -4    1.72    1.80   1 0.04476-0.04293-0.46425-0.81486-0.88457-0.57805
   2   8  -4   -0.45    2.97   1-0.62901-0.38080-0.07917 0.31248 0.77334 0.87025
  -2   8   4   -0.78    2.05   1-0.77606-0.68416 0.34615 0.69527 0.52716 0.22025
  -2  -8   3   -0.71    2.09   1-0.60777-0.82406 0.66132 0.26769-0.43961-0.49924
   2  -8  -3    3.36    2.45   1-0.80128-0.92487 0.13902-0.20803-0.58191-0.31831
   2  -8  -3    0.79    1.66   1 0.10053-0.01935-0.42544-0.77302-0.89938-0.63407
   2   8  -3   -0.15    3.03   1-0.60237-0.38643-0.04285 0.35171 0.79706 0.85262
   2   8  -3    1.29    1.48   1-0.45513-0.23420-0.13051 0.26110 0.88080 0.93646
  -2   8   3    2.22    2.26   1-0.78373-0.65958 0.36829 0.71412 0.50011 0.23446
  -2  -8   2   -2.46    2.20   1-0.66419-0.84863 0.57218 0.17537-0.48110-0.49906
   2  -8  -2    1.24    1.93   1-0.77985-0.93553 0.26702-0.07722-0.56615-0.34469
   2  -8  -2   -2.77    2.18   1 0.15841 0.00629-0.38257-0.72727-0.91024-0.68632
   2   8  -2   -0.53    2.52   1-0.57358-0.38992-0.00567 0.39181 0.81912 0.83333
   2   8  -2    0.72    1.81   1-0.56734-0.37900-0.00213 0.39335 0.82347 0.83763
  -2   8   2   -1.15    2.60   1-0.79040-0.63399 0.38992 0.73246 0.47246 0.24807
  -2  -8   1    2.54    3.08   1-0.71378-0.86668 0.47183 0.07197-0.51757-0.49363
   2  -8  -1    0.13    2.25   1-0.74389-0.93149 0.39413 0.05310-0.53970-0.35986
   2  -8  -1   -0.68    2.61   1 0.21651 0.03216-0.33677-0.67858-0.91635-0.73381
   2   8  -1    3.22    2.99   1-0.54261-0.39122 0.03231 0.43271 0.83936 0.81222
   2   8  -1    0.50    1.64   1-0.61833-0.46221 0.06436 0.46318 0.78327 0.75618
  -2   8   1    0.73    2.22   1-0.79605-0.60739 0.41099 0.75024 0.44427 0.26114
   2  -8   0    8.82    2.47   1-0.69459-0.91411 0.51387 0.17606-0.50345-0.36522
  -2  -8   0   10.14    3.22   1-0.75433-0.87531 0.36241-0.04066-0.54738-0.48184
   2  -8   0    5.89    2.78   1 0.27364 0.05706-0.28888-0.62781-0.91742-0.77627
   2   8   0    7.04    2.48   1-0.50942-0.39030 0.07101 0.47433 0.85758 0.78909
   2   8   0    5.90    2.21   1-0.64458-0.52069 0.10137 0.50353 0.75778 0.68943
  -2   8   0    7.73    2.51   1-0.80067-0.57976 0.43143 0.76740 0.41566 0.27379
   2  -8   1   64.65    3.69   1-0.63535-0.88667 0.62034 0.28555-0.45989-0.36368
  -2  -8  -1   64.26    3.43   1-0.78386-0.87306 0.24835-0.15773-0.56910-0.46138
   2  -8   1   62.05    3.38   1 0.32883 0.08003-0.23972-0.57576-0.91345-0.81368
   2   8   1   62.24    3.31   1-0.65831-0.56665 0.12166 0.52715 0.74284 0.63325
  -2   8  -1   62.63    3.58   1-0.80433-0.55126 0.45154 0.78410 0.38620 0.28511
   2  -8   2    5.52    2.61   1-0.57039-0.85356 0.71049 0.37889-0.41212-0.35758
  -2  -8  -2    3.00    2.52   1-0.80166-0.85887 0.13561-0.27368-0.58219-0.43292
   2  -8   2    2.02    2.03   1 0.38089 0.09990-0.19051-0.52348-0.90477-0.84615
   2   8   2    4.22    1.95   1-0.43661-0.38204 0.14986 0.55902 0.88707 0.73588
   2   8   2    7.21    2.27   1-0.66475-0.60532 0.13141 0.54024 0.73541 0.58457
  -2   8  -2    7.38    2.08   1-0.80687-0.52152 0.47035 0.79967 0.35737 0.29754
   2  -8   3   26.45    3.20   1-0.50338-0.81840 0.78417 0.45576-0.36285-0.34998
  -2  -8  -3   21.29    2.73   1-0.80876-0.83399 0.02890-0.38360-0.58741-0.39660
  -2  -8  -3   27.84    2.68   1 0.38132 0.35975-0.19009-0.60238-0.90468-0.71253
  -2   8  -3   30.39    3.03   1-0.43705-0.12302 0.14940 0.47872 0.88693 0.86930
   2   8   3   24.31    2.99   1-0.66646-0.63926 0.13404 0.54620 0.73338 0.54128
  -2   8  -3   21.33    2.44   1-0.80842-0.49078 0.48794 0.81404 0.32917 0.31059
   2  -8   4   -2.41    2.04   1-0.43734-0.78394 0.84258 0.51711-0.31429-0.34354
  -2  -8  -4   -1.77    2.82   1-0.80724-0.80047-0.06796-0.48368-0.58629-0.35394
  -2  -8  -4    0.67    2.40   1 0.33886 0.34944-0.23046-0.64586-0.91217-0.67878
  -2   8  -4    3.52    2.36   1-0.48255-0.13625 0.10100 0.42740 0.87001 0.89373
   2   8   4   -0.19    2.48   1-0.66486-0.66989 0.13158 0.54708 0.73528 0.50193
  -2   8  -4    1.48    1.63   1-0.80906-0.45912 0.50377 0.82663 0.30270 0.32538
   2  -8   5   83.98    4.07   1-0.37344-0.75181 0.88830 0.56597-0.26730-0.33829
  -2  -8  -5   92.91    4.89   1-0.79973-0.76233-0.15207-0.57027-0.58077-0.30600
  -2  -8  -5   70.65    3.82   1 0.29490 0.33771-0.27029-0.68857-0.91650-0.64173
  -2   8  -5   82.86    3.80   1-0.52472-0.14614 0.05340 0.37688 0.84959 0.91465
   2   8   5   84.44    3.78   1-0.66075-0.69801 0.12533 0.54416 0.74006 0.46546
   2  -8   6    1.16    2.08   1-0.31267-0.72281 0.92340 0.60421-0.22261-0.33534
  -2  -8  -6   -0.50    2.94   1-0.78855-0.71925-0.22439-0.64577-0.57255-0.25622
  -2  -8  -6   -0.34    2.22   1 0.25105 0.32609-0.30816-0.72932-0.91760-0.60145
  -2   8  -6    1.80    3.76   1-0.56355-0.15269 0.00684 0.32740 0.82605 0.93246
   2   8   6   -2.68    3.33   1-0.65463-0.72411 0.11614 0.53831 0.74697 0.43112
   2  -8   7  196.36    5.52   1-0.25530-0.69721 0.94987 0.63383-0.18042-0.33488
  -2  -8  -7  196.48    5.11   1-0.77581-0.67459-0.28450-0.70906-0.56318-0.20529
   2   8   7  193.11    5.53   1-0.64681-0.74852 0.10461 0.53012 0.75543 0.39834
   2  -8   8    3.07    3.37   1-0.20125-0.67493 0.96938 0.65648-0.14068-0.33688
  -2  -8  -8   -0.13    2.43   1-0.76299-0.62986-0.33346-0.76122-0.55375-0.15430
  -2   8  -8    0.32    3.77   1-0.63147-0.15607-0.08262 0.23209 0.77097 0.96008
   2   8   8   -4.55    3.72   1-0.63750-0.77144 0.09117 0.52000 0.76503 0.36669
   2  -8   9   49.25    4.45   1-0.15045-0.65577 0.98320 0.67334-0.10332-0.34141
  -2  -8  -9   53.88    5.03   1-0.75107-0.58604-0.37263-0.80357-0.54499-0.10398
  -2   8  -9   46.53    4.60   1-0.66080-0.15312-0.12540 0.18639 0.74000 0.97046
   2   8   9   51.50    4.32   1-0.62683-0.79300 0.07611 0.50828 0.77542 0.33582
   2  -8  10    2.16    3.41   1-0.10233-0.63941 0.99242 0.68571-0.06794-0.34777
  -2  -8 -10    3.04    4.26   1-0.74066-0.54371-0.40335-0.83747-0.53733-0.05476
  -2   8 -10    4.73    4.12   1-0.68720-0.14725-0.16686 0.14202 0.70703 0.97884
   2   8  10   -3.32    2.91   1-0.61490-0.81330 0.05968 0.49518 0.78634 0.30549
   2  -8  11   15.37    2.96   1-0.05673-0.62556 0.99779 0.69421-0.03440-0.35598
  -2  -8 -11   14.65    3.83   1-0.73202-0.50317-0.42684-0.86415-0.53098-0.00685
  -2   8 -11   11.95    3.49   1-0.71081-0.13858-0.20700 0.09896 0.67223 0.98539
   2   8  11   11.11    4.18   1-0.60175-0.83239 0.04203 0.48087 0.79757 0.27547
   2  -8  12    3.06    3.69   1-0.01334-0.61393 0.99990 0.69946-0.00249-0.36582
  -2  -8 -12   -5.52    3.15   1-0.72526-0.46450-0.44418-0.88467-0.52601 0.03966
  -2   8 -12    7.15    3.80   1-0.73172-0.12722-0.24584 0.05720 0.63571 0.99022
   2   8  12    1.95    3.63   1-0.58743-0.85029 0.02331 0.46548 0.80893 0.24558
   2  -8  13    5.10    3.00   1 0.02810-0.60425 0.99921 0.70190 0.02797-0.37709
  -2  -8 -13    4.44    4.53   1-0.72036-0.42769-0.45625-0.89993-0.52240 0.08483
  -2   8 -13   10.15    4.39   1-0.75005-0.11327-0.28343 0.01669 0.59756 0.99342
   2   8  13   12.23    4.45   1-0.57195-0.86704 0.00362 0.44912 0.82027 0.21568
   2  -8  14    5.99    3.61   1 0.06783-0.59627 0.99605 0.70188 0.05719-0.38961
  -2  -8 -14   -1.01    3.65   1-0.71722-0.39265-0.46377-0.91063-0.52010 0.12869
  -2   8 -14   -4.08    4.54   1-0.76586-0.09681-0.31979-0.02258 0.55783 0.99504
   2   8  14   -0.31    4.32   1-0.55530-0.88262-0.01697 0.43186 0.83147 0.18562
   2  -8  15   -1.14    3.92   1 0.10607-0.58980 0.99069 0.69966 0.08531-0.40324
  -2  -8 -15   -0.47    4.84   1-0.71572-0.35923-0.46732-0.91737-0.51899 0.17136
  -2   8 -15   11.17    4.47   1-0.77921-0.07788-0.35496-0.06066 0.51655 0.99511
   2   8  15    1.66    4.23   1-0.53749-0.89704-0.03841 0.41376 0.84239 0.15529
  -2 -10  14   -1.16    4.25   1-0.04766-0.65534 0.99847 0.54648-0.02773-0.52142
   2  10 -14   -8.14    4.96   1-0.78443-0.17143-0.37044 0.08468 0.49741 0.98154
  -2  10  14    1.72    5.36   1-0.63748-0.82429 0.09115 0.56581 0.76504 0.01961
  -2 -10  13    3.54    3.99   1-0.09259-0.66850 0.99384 0.53871-0.06077-0.51272
   2 -10 -13    6.44    3.24   1-0.77183-0.62036-0.30061-0.77074-0.56026 0.14527
   2  10 -13    5.68    4.73   1-0.77475-0.19402-0.34260 0.11545 0.53139 0.97417
  -2  10  13   10.84    4.07   1-0.65408-0.80866 0.11533 0.58666 0.74757 0.04339
  -2 -10  12    0.57    3.36   1-0.13897-0.68313 0.98574 0.52746-0.09488-0.50508
   2 -10 -12   -2.13    3.23   1-0.77687-0.65730-0.28001-0.74696-0.56396 0.10001
   2  10 -12    1.04    3.63   1-0.76358-0.21513-0.31426 0.14671 0.56406 0.96550
  -2  10  12    5.28    3.39   1-0.66962-0.79197 0.13891 0.60690 0.72959 0.06666
  -2 -10  11   -1.64    3.94   1-0.18671-0.69933 0.97377 0.51246-0.12999-0.49830
   2 -10 -11    0.08    3.32   1-0.78289-0.69523-0.25299-0.71675-0.56839 0.05402
   2  10 -11   -3.30    4.47   1-0.75098-0.23480-0.28544 0.17844 0.59543 0.95552
  -2  10  11   -0.33    2.93   1-0.68391-0.77474 0.16151 0.62592 0.71145 0.08943
  -2 -10  10   -5.36    3.03   1-0.23613-0.71698 0.95737 0.49292-0.16632-0.49291
   2 -10 -10   -0.85    3.19   1-0.78960-0.73384-0.21870-0.67927-0.57332 0.00753
   2  10 -10    1.46    3.55   1-0.73695-0.25305-0.25617 0.21063 0.62550 0.94424
  -2  10  10   -1.27    3.29   1-0.69742-0.75599 0.18381 0.64494 0.69268 0.11191
  -2 -10   9   -1.45    2.63   1-0.28703-0.73611 0.93599 0.46839-0.20376-0.48860
   2 -10  -9    0.93    4.34   1-0.79649-0.77264-0.17624-0.63363-0.57839-0.03908
   2 -10  -9   -0.26    2.41   1 0.01736 0.04898-0.48243-0.94047-0.87576-0.33630
   2  10  -9    3.11    4.01   1-0.72155-0.26991-0.22649 0.24324 0.65426 0.93165
  -2  10   9    1.31    3.16   1-0.70993-0.73625 0.20544 0.66328 0.67363 0.13412
  -2 -10   8    2.66    3.34   1-0.33929-0.75660 0.90896 0.43822-0.24218-0.48529
   2 -10  -8    1.72    2.96   1-0.80269-0.80893-0.12590-0.58157-0.58294-0.08599
   2 -10  -8    3.75    2.80   1 0.04104 0.04042-0.46675-0.92188-0.88343-0.38535
   2  10  -8    4.26    3.59   1-0.70477-0.28542-0.19641 0.27623 0.68169 0.91772
  -2  10   8   -1.80    3.91   1-0.72147-0.71553 0.22634 0.68089 0.65440 0.15614
  -2 -10   7    0.03    3.57   1-0.39263-0.77817 0.87557 0.40169-0.28141-0.48278
   2 -10  -7    4.21    2.94   1-0.80740-0.84563-0.06498-0.51743-0.58641-0.13100
   2 -10  -7    4.74    3.11   1 0.06849 0.03564-0.44803-0.90000-0.89138-0.43441
   2  10  -7    4.41    3.89   1-0.68667-0.29959-0.16599 0.30957 0.70775 0.90244
  -2  10   7   -1.81    2.61   1-0.73205-0.69386 0.24647 0.69773 0.63510 0.17810
  -2 -10   6    1.90    2.73   1-0.44664-0.80040 0.83509 0.35806-0.32112-0.48075
   2 -10  -6   -1.33    2.02   1-0.80909-0.87931 0.00583-0.44340-0.58765-0.17378
   2 -10  -6   -0.87    2.03   1 0.10066 0.03558-0.42535-0.87444-0.89941-0.48382
   2  10  -6    1.54    2.84   1-0.66727-0.31246-0.13527 0.34320 0.73242 0.88576
  -2  10   6    2.45    2.90   1-0.74167-0.67123 0.26574 0.71371 0.61587 0.20014
  -2 -10   5   -1.90    3.48   1-0.50024-0.82275 0.78724 0.30735-0.36054-0.47811
   2 -10  -5    2.99    3.01   1-0.80611-0.90832 0.08613-0.35989-0.58546-0.21313
   2 -10  -5    2.91    3.29   1 0.13614 0.03883-0.39939-0.84559-0.90661-0.53241
   2  10  -5    2.06    3.25   1-0.64661-0.32408-0.10433 0.37707 0.75564 0.86763
  -2  10   5    6.23    3.75   1-0.75034-0.64764 0.28406 0.72875 0.59689 0.22242
  -2 -10   4    5.61    3.23   1-0.55343-0.84410 0.73074 0.24766-0.39965-0.47555
   2 -10  -4    6.46    2.85   1-0.79673-0.93093 0.17456-0.26825-0.57856-0.24778
   2 -10  -4    3.79    2.73   1 0.17424 0.04471-0.37037-0.81369-0.91239-0.57957
   2  10  -4    2.51    2.59   1-0.62476-0.33451-0.07323 0.41108 0.77736 0.84800
  -2  10   4    5.08    2.43   1-0.75806-0.62311 0.30130 0.74270 0.57840 0.24518
  -2 -10   3   23.01    3.64   1-0.60458-0.86340 0.66578 0.17952-0.43726-0.47149
   2 -10  -3   16.01    2.65   1-0.77925-0.94558 0.26966-0.17042-0.56571-0.27717
   2 -10  -3   20.00    3.36   1 0.21425 0.05249-0.33860-0.77903-0.91621-0.62477
   2  10  -3   13.24    3.71   1-0.60180-0.34382-0.04209 0.44514 0.79753 0.82682
  -2  10   3   15.75    3.61   1-0.76483-0.59763 0.31728 0.75539 0.56067 0.26871
  -2 -10   2   17.11    2.57   1-0.65232-0.87930 0.59272 0.10327-0.47237-0.46492
   2 -10  -2   21.99    2.50   1-0.75318-0.95142 0.36606-0.07079-0.54654-0.29961
   2 -10  -2   19.42    3.45   1 0.25545 0.06147-0.30444-0.74198-0.91763-0.66758
   2  10  -2   23.79    2.78   1-0.57783-0.35212-0.01103 0.47912 0.81608 0.80401
   2  10  -2   14.91    2.35   1-0.55819-0.32670-0.01344 0.47428 0.82959 0.81750
  -2  10   2   21.15    3.31   1-0.77063-0.57117 0.33176 0.76659 0.54410 0.29341
  -2 -10   1   30.70    3.36   1-0.69509-0.89055 0.51283 0.02036-0.50382-0.45441
   2 -10  -1   34.01    2.88   1-0.71833-0.94849 0.46113 0.02750-0.52091-0.31559
   2 -10  -1   34.20    3.58   1 0.29717 0.07096-0.26828-0.70294-0.91635-0.70769
   2  10  -1   31.86    3.81   1-0.55299-0.35956 0.01979 0.51287 0.83294 0.77953
   2  10  -1   31.33    2.74   1-0.60168-0.40242 0.04193 0.53300 0.79763 0.74428
  -2  10   1   34.39    3.25   1-0.77542-0.54370 0.34441 0.77595 0.52924 0.31980
   2 -10   0    9.50    2.42   1-0.67559-0.93768 0.55133 0.12092-0.48948-0.32578
  -2 -10   0    5.00    2.21   1-0.73190-0.89544 0.42716-0.06852-0.53089-0.43987
   2 -10   0    7.17    3.57   1 0.33878 0.08035-0.23053-0.66231-0.91218-0.74490
   2  10   0   10.91    2.85   1-0.52749-0.36633 0.05018 0.54618 0.84807 0.75331
   2  10   0    7.66    2.34   1-0.62647-0.45944 0.07561 0.57001 0.77576 0.68116
  -2  10   0    8.54    2.63   1-0.77912-0.51515 0.35471 0.78296 0.51685 0.34868
   2 -10   1   15.57    2.70   1-0.62662-0.92048 0.63379 0.20635-0.45347-0.33185
  -2 -10  -1   15.47    2.99   1-0.76156-0.89318 0.33843-0.16048-0.55270-0.42007
   2 -10   1   13.17    2.69   1 0.37923 0.08863-0.19212-0.62076-0.90513-0.77897
   2  10   1   10.92    3.03   1-0.50156-0.37268 0.07990 0.57882 0.86142 0.72531
   2  10   1    7.44    2.79   1-0.64071-0.50591 0.09577 0.59351 0.76178 0.62593
  -2  10  -1   17.08    2.82   1-0.78159-0.48537 0.36187 0.78684 0.50808 0.38116
   2 -10   2   10.06    3.41   1-0.57338-0.89908 0.70679 0.28254-0.41432-0.33437
  -2 -10  -2   10.02    2.51   1-0.78375-0.88356 0.24888-0.25295-0.56902-0.39411
   2  10   2   11.61    2.62   1-0.47554-0.37893 0.10865 0.61048 0.87295 0.69549
  -2  10  -2    7.45    3.32   1-0.42708-0.10328 0.15964 0.58456 0.89000 0.80474
   2  10   2    7.13    2.92   1-0.64831-0.54574 0.10682 0.60789 0.75383 0.57674
  -2  10  -2    8.27    1.98   1-0.78251-0.45403 0.36460 0.78628 0.50470 0.41905
   2 -10   3    2.11    2.16   1-0.51772-0.87527 0.76976 0.34870-0.37339-0.33512
  -2 -10  -3    8.06    2.27   1-0.79843-0.86625 0.16218-0.34286-0.57981-0.36337
  -2  10  -3   -6.78    3.20   1-0.46494-0.10887 0.12007 0.54207 0.87715 0.83324
   2  10   3    2.09    2.47   1-0.44986-0.38552 0.13607 0.64082 0.88267 0.66385
   2  10   3    0.66    2.42   1-0.65140-0.58106 0.11136 0.61576 0.75051 0.53216
  -2  10  -3    1.23    2.05   1-0.78113-0.42040 0.36051 0.77890 0.50976 0.46536
   2 -10   4   16.27    2.49   1-0.46148-0.85059 0.82266 0.40454-0.33203-0.33590
  -2 -10  -4   19.70    3.09   1-0.80649-0.84232 0.08040-0.42785-0.58574-0.32775
  -2  10  -4   26.69    3.69   1-0.50124-0.11289 0.08026 0.49934 0.86157 0.85901
   2  10   4   10.79    2.25   1-0.42504-0.39298 0.16172 0.66940 0.89060 0.63044
   2  10   4   15.41    2.62   1-0.65120-0.61308 0.11106 0.61879 0.75073 0.49113
   2 -10   5   11.31    3.35   1-0.40545-0.82634 0.86661 0.45162-0.29084-0.33644
  -2 -10  -5    4.13    2.63   1-0.80909-0.81293 0.00539-0.50608-0.58765-0.28812
  -2 -10  -5    7.29    2.47   1 0.38348 0.38453-0.18798-0.69881-0.90421-0.60315
  -2  10  -5    1.52    2.79   1-0.53577-0.11514 0.04044 0.45660 0.84339 0.88218
   2  10   5    5.76    3.20   1-0.64845-0.64256 0.10702 0.61809 0.75369 0.45284
   2 -10   6   77.79    3.92   1-0.35059-0.80325 0.90240 0.49056-0.25049-0.33783
  -2 -10  -6   60.46    4.93   1-0.80756-0.77942-0.06172-0.57641-0.58653-0.24545
  -2 -10  -6   59.96    4.99   1 0.36019 0.39348-0.21042-0.72412-0.90883-0.56640
  -2  10  -6   65.16    5.12   1-0.56840-0.11550 0.00082 0.41406 0.82274 0.90289
   2  10   6   62.75    5.19   1-0.64364-0.66998 0.10001 0.61441 0.75876 0.41666
   2 -10   7    2.43    2.88   1-0.29738-0.78181 0.93106 0.52236-0.21137-0.34044
  -2 -10  -7   -0.62    3.82   1-0.80323-0.74310-0.12046-0.63836-0.58335-0.20072
  -2  10  -7    0.75    2.99   1-0.59905-0.11387-0.03845 0.37186 0.79978 0.92127
   2  10   7   -0.45    3.06   1-0.63708-0.69566 0.09058 0.60832 0.76545 0.38210
   2 -10   8    6.08    2.68   1-0.24606-0.76225 0.95357 0.54801-0.17362-0.34444
  -2 -10  -8    6.89    4.01   1-0.79735-0.70706-0.17014-0.69023-0.57902-0.15377
  -2  10  -8   13.47    3.68   1-0.62766-0.11021-0.07727 0.33012 0.77464 0.93747
   2  10   8    9.12    4.39   1-0.62899-0.71979 0.07913 0.60020 0.77337 0.34877
   2 -10   9   -1.25    3.30   1-0.19669-0.74466 0.97079 0.56838-0.13732-0.34988
  -2 -10  -9   -0.13    3.88   1-0.79067-0.66846-0.21269-0.73596-0.57410-0.10729
  -2  10  -9    9.65    4.08   1-0.65421-0.10449-0.11552 0.28895 0.74743 0.95162
   2  10   9    0.85    3.02   1-0.61950-0.74253 0.06597 0.59038 0.78221 0.31636
   2 -10  10    5.80    3.05   1-0.14940-0.72898 0.98344 0.58406-0.10255-0.35701
  -2 -10 -10    7.89    3.91   1-0.78396-0.62984-0.24787-0.77433-0.56917-0.06080
  -2  10 -10    2.92    4.65   1-0.67869-0.09669-0.15314 0.24841 0.71827 0.96381
   2  10  10    5.15    3.73   1-0.60872-0.76398 0.05132 0.57906 0.79172 0.28462
   2 -10  11   -2.91    5.07   1-0.10381-0.71515 0.99219 0.59595-0.06902-0.36523
  -2 -10 -11   -2.24    4.05   1-0.77772-0.59170-0.27638-0.80602-0.56458-0.01465
  -2  10 -11    1.54    4.50   1-0.70110-0.08683-0.19008 0.20856 0.68725 0.97414
   2  10  11    0.64    2.65   1-0.59670-0.78419 0.03537 0.56644 0.80168 0.25333
   2 -10  12   -7.24    3.82   1-0.05994-0.70304 0.99752 0.60441-0.03676-0.37472
  -2 -10 -12    2.08    3.01   1-0.77227-0.55435-0.29888-0.83170-0.56058 0.03090
  -2  10 -12   -0.65    5.30   1-0.72144-0.07489-0.22629 0.16943 0.65445 0.98269
   2  10  12   -1.63    4.87   1-0.58349-0.80321 0.01824 0.55265 0.81191 0.22231
   2 -10  13   -0.36    4.57   1-0.01764-0.69250 0.99982 0.60985-0.00566-0.38536
  -2 -10 -13   -3.36    4.26   1-0.76781-0.51798-0.31601-0.85203-0.55730 0.07574
  -2  10 -13  -10.40    4.87   1-0.73972-0.06090-0.26175 0.13105 0.61991 0.98950
   2  10  13    0.73    3.26   1-0.56910-0.82105 0.00005 0.53780 0.82226 0.19141
   2 -10  14    4.55    5.45   1 0.02320-0.68341 0.99943 0.61259 0.02437-0.39706
  -2 -10 -14   -0.57    5.36   1-0.76443-0.48268-0.32836-0.86756-0.55481 0.11979
  -2  10 -14    5.47    5.42   1-0.75593-0.04484-0.29644 0.09344 0.58367 0.99461
   2  10  14   -5.85    4.77   1-0.55355-0.83773-0.01911 0.52196 0.83259 0.16049
  -2 -12  12    6.64    3.33   1-0.16615-0.75281 0.97938 0.42844-0.11487-0.49970
   2  12 -12    1.09    3.60   1-0.75825-0.16776-0.30172 0.25192 0.57793 0.95309
  -2  12  12    4.66    4.22   1-0.65482-0.73403 0.11643 0.67667 0.74675 0.05757
  -2 -12  11   -1.59    3.73   1-0.21211-0.76725 0.96587 0.41189-0.14866-0.49159
   2 -12 -11    0.69    4.24   1-0.80578-0.75865-0.09069-0.64853-0.58522 0.06200
   2  12 -11    9.70    4.82   1-0.74581-0.18759-0.27437 0.28219 0.60702 0.94083
  -2  12  11    2.98    3.46   1-0.66834-0.71531 0.13692 0.69382 0.73114 0.08320
  -2 -12  10   -4.05    3.52   1-0.25912-0.78249 0.94830 0.39118-0.18323-0.48443
   2 -12 -10    2.50    3.72   1-0.80790-0.79276-0.05461-0.60923-0.58678 0.01890
   2  12 -10   -4.93    3.94   1-0.73224-0.20629-0.24684 0.31264 0.63473 0.92719
  -2  12  10   -3.94    3.87   1-0.68062-0.69614 0.15622 0.70962 0.71578 0.10870
  -2 -12   9   -1.45    4.88   1-0.30693-0.79852 0.92633 0.36607-0.21839-0.47784
   2 -12  -9   -3.34    2.91   1-0.80904-0.82589-0.01191-0.56333-0.58762-0.02348
   2  12  -9   -4.86    3.57   1-0.71759-0.22392-0.21920 0.34320 0.66106 0.91218
  -2  12   9   -1.89    3.73   1-0.69213-0.67540 0.17497 0.72509 0.70023 0.13441
  -2 -12   8    3.51    4.30   1-0.35533-0.81515 0.89957 0.33617-0.25398-0.47170
   2 -12  -8    3.12    3.90   1-0.80853-0.85737 0.03758-0.51061-0.58724-0.06464
   2 -12  -8    2.90    2.85   1 0.18430 0.14180-0.36251-0.91021-0.91357-0.38909
   2  12  -8    2.47    4.91   1-0.70193-0.24054-0.19151 0.37381 0.68600 0.89577
  -2  12   8    2.76    3.29   1-0.70266-0.65367 0.19276 0.73959 0.68491 0.16035
  -2 -12   7    1.97    4.10   1-0.40404-0.83210 0.86761 0.30107-0.28980-0.46578
   2 -12  -7    0.42    2.94   1-0.80554-0.88637 0.09385-0.45113-0.58504-0.10399
   2 -12  -7   -2.68    3.03   1 0.20288 0.12816-0.34777-0.89258-0.91536-0.43226
   2  12  -7   -0.44    4.25   1-0.68535-0.25622-0.16384 0.40440 0.70954 0.87795
  -2  12   7    7.35    3.53   1-0.71220-0.63095 0.20947 0.75301 0.66999 0.18669
  -2 -12   6    1.77    4.24   1-0.45268-0.84897 0.83010 0.26042-0.32556-0.45981
   2 -12  -6    5.55    4.05   1-0.79917-0.91199 0.15651-0.38526-0.58036-0.14085
   2 -12  -6    1.20    2.44   1 0.22470 0.11776-0.33007-0.87201-0.91681-0.47510
   2  12  -6    3.31    3.23   1-0.66791-0.27107-0.13627 0.43488 0.73165 0.85871
  -2  12   6   -0.54    3.35   1-0.72074-0.60724 0.22499 0.76525 0.65567 0.21363
  -2 -12   5    3.17    4.06   1-0.50036-0.86540 0.78713 0.21459-0.36063-0.45279
   2 -12  -5    3.63    3.56   1-0.78849-0.93330 0.22474-0.31382-0.57250-0.17454
   2 -12  -5    0.73    2.95   1 0.24927 0.11010-0.30966-0.84871-0.91758-0.51726
   2  12  -5    0.36    2.95   1-0.64973-0.28516-0.10890 0.46517 0.75231 0.83802
  -2  12   5    2.15    4.18   1-0.72827-0.58251 0.23916 0.77613 0.64219 0.24141
  -2 -12   4    2.36    2.37   1-0.54723-0.88043 0.73785 0.16212-0.39510-0.44558
   2 -12  -4   -0.45    2.26   1-0.77245-0.94942 0.29816-0.23775-0.56071-0.20509
   2 -12  -4    1.03    2.52   1 0.27608 0.10469-0.28676-0.82292-0.91735-0.55841
   2  12  -4    2.57    3.74   1-0.63093-0.29863-0.08185 0.49514 0.77150 0.81587
  -2  12   4    0.62    3.42   1-0.73474-0.55673 0.25177 0.78545 0.62988 0.27036
  -2 -12   3   -0.42    3.65   1-0.59213-0.89348 0.68270 0.10379-0.42811-0.43693
   2 -12  -3   -1.96    2.85   1-0.75092-0.95981 0.37312-0.15957-0.54487-0.23087
   2 -12  -3    1.80    2.65   1 0.30465 0.10104-0.26161-0.79489-0.91582-0.59826
   2  12  -3   -2.76    3.74   1-0.61163-0.31160-0.05524 0.52467 0.78921 0.79222
  -2  12   3   -1.62    3.55   1-0.74010-0.52984 0.26253 0.79293 0.61912 0.30086
  -2 -12   2    8.14    3.18   1-0.63423-0.90373 0.62209 0.03999-0.45907-0.42621
   2 -12  -2    2.31    2.56   1-0.72346-0.96427 0.44866-0.08080-0.52468-0.25229
   2 -12  -2    6.27    3.60   1 0.33453 0.09868-0.23447-0.76487-0.91274-0.63657
   2  12  -2    3.39    3.60   1-0.59201-0.32426-0.02924 0.55359 0.80539 0.76706
  -2  12   2    5.13    3.07   1-0.74424-0.50172 0.27107 0.79818 0.61042 0.33342
  -2 -12   1   -1.35    3.71   1-0.67270-0.91036 0.55673-0.02855-0.48736-0.41282
   2 -12  -1   -2.70    2.23   1-0.69027-0.96299 0.52272-0.00351-0.50028-0.26949
   2 -12  -1    0.52    3.47   1 0.36466 0.09668-0.20616-0.73334-0.90802-0.67295
   2  12  -1    2.45    3.39   1-0.57226-0.33679-0.00401 0.58173 0.82005 0.74036
   2  12  -1    1.27    2.39   1-0.57040-0.32799 0.00167 0.58498 0.82136 0.74176
  -2  12   1    0.61    2.94   1-0.74698-0.47221 0.27683 0.80066 0.60446 0.36872
   2 -12   0    1.46    2.50   1-0.65190-0.95644 0.59344 0.07016-0.47206-0.28335
  -2 -12   0    2.54    3.48   1-0.70670-0.91280 0.48791-0.10038-0.51236-0.39587
   2  12   0   -3.34    3.22   1-0.55264-0.34944 0.02021 0.60889 0.83317 0.71213
   2  12   0   -1.22    2.45   1-0.59682-0.38665 0.03553 0.62217 0.80158 0.68073
  -2  12   0   -0.54    2.27   1-0.74801-0.44098 0.27903 0.79957 0.60217 0.40769
   2 -12   1    5.50    3.49   1-0.60933-0.94572 0.65911 0.13902-0.44076-0.29373
  -2 -12  -1   10.26    2.69   1-0.73588-0.91006 0.41655-0.17497-0.53381-0.37571
   2  12   1    5.56    3.04   1-0.53342-0.36250 0.04321 0.63480 0.84473 0.68235
  -2  12  -1    8.41    2.59   1-0.43604-0.10248 0.15045 0.67096 0.88725 0.73437
   2  12   1    2.62    2.82   1-0.61316-0.43522 0.05732 0.64729 0.78787 0.62577
  -2  12  -1    1.60    2.86   1-0.74679-0.40751 0.27643 0.79368 0.60488 0.45166
   2 -12   2   10.58    3.70   1-0.56353-0.93176 0.71882 0.20193-0.40708-0.30172
  -2 -12  -2    6.27    3.23   1-0.75978-0.90205 0.34450-0.25024-0.55139-0.35168
   2  12   2    0.26    2.41   1-0.51496-0.37631 0.06468 0.65919 0.85476 0.65103
  -2  12  -2    4.18    4.50   1-0.46644-0.10060 0.11847 0.63606 0.87658 0.76504
   2  12   2    9.49    3.22   1-0.62287-0.47716 0.07062 0.66392 0.77912 0.57577
  -2  12  -2    2.13    2.48   1-0.74228-0.37075 0.26700 0.78096 0.61459 0.50262
   2 -12   3   24.26    3.39   1-0.51554-0.91561 0.77200 0.25829-0.37178-0.30810
  -2 -12  -3   21.02    4.18   1-0.77839-0.88874 0.27345-0.32452-0.56508-0.32376
   2  12   3   22.32    3.51   1-0.49765-0.39127 0.08429 0.68172 0.86327 0.61818
  -2  12  -3   22.89    3.55   1-0.49640-0.09829 0.08568 0.60035 0.86385 0.79367
   2  12   3   25.63    4.03   1-0.62793-0.51444 0.07765 0.67429 0.77438 0.52978
   2 -12   4   11.78    4.12   1-0.46652-0.89816 0.81830 0.30751-0.33575-0.31422
  -2 -12  -4    6.75    4.02   1-0.79210-0.87053 0.20433-0.39646-0.57516-0.29152
  -2  12  -4    8.35    2.89   1-0.52569-0.09530 0.05227 0.56403 0.84906 0.82023
   2  12   4   -1.48    2.50   1-0.48199-0.40789 0.10162 0.70197 0.87026 0.58382
   2  12   4    3.36    3.47   1-0.62953-0.54827 0.07989 0.67986 0.77285 0.48700
   2 -12   5   43.39    4.50   1-0.41693-0.88033 0.85825 0.35060-0.29928-0.31949
  -2 -12  -5   41.35    5.34   1-0.80120-0.84764 0.13967-0.46434-0.58185-0.25667
  -2  12  -5   45.11    4.75   1-0.55410-0.09144 0.01844 0.52727 0.83224 0.84476
   2  12   5   39.12    3.55   1-0.46857-0.42674 0.11618 0.71945 0.87575 0.54796
   2  12   5   60.83    4.92   1-0.62843-0.57940 0.07834 0.68165 0.77390 0.44681
   2 -12   6   25.89    3.86   1-0.36751-0.86268 0.89207 0.38757-0.26294-0.32489
  -2 -12  -6   32.91    4.20   1-0.80652-0.82097 0.07994-0.52727-0.58576-0.21904
  -2  12  -6   31.93    4.18   1-0.58147-0.08653-0.01567 0.49024 0.81341 0.86727
   2  12   6   28.47    3.45   1-0.62512-0.60832 0.07373 0.68038 0.77703 0.40868
   2 -12   7   47.25    5.79   1-0.31871-0.84565 0.92025 0.41889-0.22705-0.33074
  -2 -12  -7   79.48    4.33   1-0.80883-0.79129 0.02585-0.58458-0.58746-0.17920
  -2  12  -7   60.02    5.97   1-0.60767-0.08046-0.04992 0.45307 0.79261 0.88783
   2  12   7   69.50    4.73   1-0.61995-0.63538 0.06659 0.67657 0.78180 0.37220
   2 -12   8   14.55    3.66   1-0.27082-0.82953 0.94331 0.44510-0.19183-0.33726
  -2 -12  -8   14.20    3.95   1-0.80890-0.75937-0.02226-0.63591-0.58751-0.13771
  -2  12  -8   18.65    3.42   1-0.63258-0.07309-0.08418 0.41589 0.76990 0.90647
   2  12   8   17.27    4.40   1-0.61315-0.66081 0.05731 0.67062 0.78788 0.33702
   2 -12   9   40.70    4.08   1-0.22403-0.81451 0.96178 0.46670-0.15742-0.34459
  -2 -12  -9   41.98    4.15   1-0.80743-0.72591-0.06431-0.68117-0.58643-0.09508
  -2  12  -9   41.35    5.28   1-0.65611-0.06435-0.11835 0.37879 0.74532 0.92323
   2  12   9   37.11    4.50   1-0.60488-0.68477 0.04619 0.66283 0.79497 0.30287
   2 -12  10    5.74    3.37   1-0.17842-0.80068 0.97612 0.48418-0.12389-0.35279
  -2 -12 -10    8.05    4.19   1-0.80503-0.69152-0.10042-0.72049-0.58466-0.05177
  -2  12 -10    4.60    4.39   1-0.67819-0.05415-0.15235 0.34188 0.71891 0.93818
   2  12  10    4.25    3.99   1-0.59525-0.70737 0.03347 0.65345 0.80283 0.26948
   2 -12  11   19.91    5.05   1-0.13418-0.78802 0.98673 0.49782-0.09136-0.36219
  -2 -12 -11   24.15    4.44   1-0.80225-0.65907-0.13007-0.75204-0.58262-0.00689
  -2  12 -11   13.25    4.66   1-0.69876-0.04245-0.18610 0.30522 0.69071 0.95133
   2  12  11   19.70    4.36   1-0.58434-0.72868 0.01933 0.64265 0.81127 0.23667
   2 -12  12    0.88    4.22   1-0.09100-0.77660 0.99406 0.50828-0.05960-0.37219
  -2 -12 -12   -3.12    4.66   1-0.79934-0.62424-0.15520-0.78036-0.58048 0.03680
  -2  12 -12    3.55    5.04   1-0.71777-0.02918-0.21952 0.26887 0.66076 0.96273
   2  12  12    6.99    4.96   1-0.57219-0.74877 0.00392 0.63057 0.82010 0.20425
  -2 -14  10   -3.66    5.33   1-0.26847-0.83435 0.94434 0.29456-0.19010-0.46591
   2  14 -10   -8.09    5.67   1-0.73286-0.16487-0.24806 0.40410 0.63354 0.89973
  -2  14  10   -0.67    4.14   1-0.65895-0.63055 0.12262 0.76842 0.74211 0.10918
  -2 -14   9   -1.37    3.85   1-0.31326-0.84737 0.92310 0.27018-0.22304-0.45711
   2  14  -9    6.37    4.02   1-0.71945-0.18374-0.22262 0.43246 0.65789 0.88273
  -2  14   9    0.42    3.65   1-0.66948-0.60886 0.13869 0.78116 0.72975 0.13807
  -2 -14   8   -0.91    5.01   1-0.35816-0.86050 0.89785 0.24179-0.25606-0.44839
   2 -14  -8   -2.24    3.38   1-0.79587-0.88730 0.18051-0.46022-0.57793-0.02969
   2  14  -8   -0.05    3.65   1-0.70533-0.20189-0.19738 0.46061 0.68084 0.86433
  -2  14   8   -6.37    5.13   1-0.67873-0.58669 0.15321 0.79232 0.71822 0.16735
  -2 -14   7    0.73    4.38   1-0.40292-0.87350 0.86841 0.20920-0.28898-0.43957
   2 -14  -7    0.64    3.07   1-0.78748-0.91091 0.23008-0.40743-0.57176-0.06507
   2  14  -7    1.77    3.66   1-0.69059-0.21943-0.17242 0.48849 0.70238 0.84452
  -2  14   7   -8.07    4.24   1-0.68715-0.56285 0.16678 0.80261 0.70710 0.19749
  -2 -14   6    3.89    3.43   1-0.44723-0.88603 0.83461 0.17226-0.32156-0.43041
   2 -14  -6    2.12    2.83   1-0.77574-0.93144 0.28476-0.35021-0.56313-0.09882
   2 -14  -6    1.36    3.81   1 0.32568 0.17688-0.24260-0.87738-0.91382-0.44598
   2  14  -6   -7.69    4.22   1-0.67535-0.23646-0.14785 0.51598 0.72252 0.82331
  -2  14   6   -1.35    4.06   1-0.69447-0.53792 0.17887 0.81141 0.69692 0.22858
  -2 -14   5    1.29    3.49   1-0.49035-0.89793 0.79670 0.13152-0.35327-0.42002
   2 -14  -5   -0.50    4.19   1-0.76061-0.94822 0.34168-0.29007-0.55200-0.12930
   2 -14  -5    0.44    2.83   1 0.34204 0.16101-0.22751-0.85940-0.91172-0.48527
   2  14  -5    2.96    3.17   1-0.65972-0.25310-0.12377 0.54298 0.74124 0.80069
  -2  14   5   -6.99    4.23   1-0.70062-0.51182 0.18926 0.81852 0.68796 0.26087
  -2 -14   4   -2.91    4.03   1-0.53259-0.90831 0.75408 0.08570-0.38432-0.40940
   2 -14  -4   -0.44    3.44   1-0.74151-0.96104 0.40095-0.22758-0.53795-0.15686
   2 -14  -4   -1.42    3.87   1 0.35992 0.14680-0.21068-0.83926-0.90888-0.52352
   2  14  -4    1.33    3.48   1-0.64384-0.26950-0.10030 0.56937 0.75855 0.77664
  -2  14   4   -2.54    3.06   1-0.70552-0.48445 0.19770 0.82367 0.68055 0.29472
  -2 -14   3   -0.96    4.75   1-0.57303-0.91691 0.70722 0.03566-0.41407-0.39747
   2 -14  -3    3.76    3.13   1-0.71821-0.96966 0.46141-0.16389-0.52082-0.18134
   2 -14  -3    1.09    2.51   1 0.38030 0.13494-0.19108-0.81680-0.90490-0.56091
   2  14  -3   -1.06    4.24   1-0.62788-0.28581-0.07757 0.59501 0.77443 0.75117
  -2  14   3    1.35    3.29   1-0.70900-0.45569 0.20381 0.82649 0.67510 0.33053
  -2 -14   2    3.81    4.51   1-0.61118-0.92321 0.65649-0.01825-0.44211-0.38385
   2 -14  -2    4.73    3.27   1-0.69071-0.97408 0.52182-0.10026-0.50060-0.20273
   2  14  -2    3.47    5.08   1-0.61201-0.30222-0.05576 0.61975 0.78887 0.72427
  -2  14   2    1.33    2.97   1-0.41323-0.13445 0.17366 0.79560 0.89391 0.59070
  -2  14   2   -0.84    3.45   1-0.71086-0.42529 0.20709 0.82648 0.67215 0.36884
  -2 -14   1    3.04    4.52   1-0.64650-0.92669 0.60242-0.07551-0.46809-0.36815
   2 -14  -1    0.74    2.88   1-0.65916-0.97438 0.58102-0.03808-0.47740-0.22161
   2  14  -1   -0.18    3.29   1-0.59644-0.31893-0.03503 0.64340 0.80188 0.69593
  -2  14   1    4.18    3.17   1-0.43538-0.12432 0.15113 0.77016 0.88746 0.62561
  -2  14   1    3.09    2.82   1-0.71072-0.39290 0.20685 0.82296 0.67236 0.41031
   2 -14   0   -3.35    2.85   1-0.62407-0.97114 0.63763 0.02171-0.45160-0.23748
  -2 -14   0    3.30    3.66   1-0.67845-0.92711 0.54593-0.13497-0.49158-0.34962
   2  14   0    3.11    3.64   1-0.58141-0.33617-0.01559 0.66575 0.81345 0.66614
  -2  14   0   -3.49    3.66   1-0.45837-0.11504 0.12707 0.74318 0.87962 0.65912
   2  14   0    0.79    2.62   1-0.55704-0.30372-0.01485 0.66401 0.83035 0.68325
  -2  14   0    5.31    3.18   1-0.70802-0.35794 0.20207 0.81489 0.67666 0.45586
   2 -14   1    3.14    3.81   1-0.58588-0.96480 0.69091 0.07818-0.42352-0.25107
  -2 -14  -1    4.48    3.58   1-0.70690-0.92364 0.48746-0.19666-0.51250-0.32893
   2  14   1    2.06    3.38   1-0.56720-0.35424 0.00231 0.68658 0.82357 0.63491
  -2  14  -1    1.38    2.76   1-0.48194-0.10633 0.10168 0.71486 0.87028 0.69113
   2  14   1    2.95    2.95   1-0.57661-0.35552 0.00949 0.69170 0.81696 0.62861
   2 -14   2   -0.50    4.14   1-0.54519-0.95595 0.74016 0.13061-0.39359-0.26283
  -2 -14  -2   -0.70    3.03   1-0.73147-0.91630 0.42828-0.25907-0.53057-0.30539
   2  14   2   -3.88    3.25   1-0.55412-0.37343 0.01841 0.70560 0.83222 0.60222
  -2  14  -2    3.13    3.50   1-0.50580-0.09792 0.07511 0.68538 0.85937 0.72156
   2  14   2   -2.44    2.50   1-0.58916-0.40031 0.02555 0.71110 0.80760 0.57800
   2 -14   3   -2.74    4.21   1-0.50263-0.94523 0.78492 0.17856-0.36229-0.27320
  -2 -14  -3    0.67    3.90   1-0.75210-0.90501 0.36944-0.32114-0.54575-0.27895
   2  14   3    2.61    3.60   1-0.54255-0.39414 0.03237 0.72248 0.83939 0.56803
  -2  14  -3    7.12    4.07   1-0.52972-0.08957 0.04756 0.65491 0.84683 0.75037
   2  14   3   -2.24    3.44   1-0.59671-0.44008 0.03538 0.72426 0.80167 0.53082
   2 -14   4   -1.27    3.36   1-0.45898-0.93313 0.82480 0.22135-0.33020-0.28329
  -2 -14  -4    1.30    4.23   1-0.76888-0.88987 0.31200-0.38180-0.55808-0.24968
  -2  14  -4   -1.22    3.89   1-0.55350-0.08107 0.01917 0.62360 0.83262 0.77752
   2  14   4   -1.94    4.34   1-0.53292-0.41678 0.04380 0.73683 0.84502 0.53232
   2  14   4    0.90    3.51   1-0.60048-0.47608 0.04034 0.73256 0.79861 0.48651
   2 -14   5   -2.96    3.13   1-0.41444-0.92037 0.86008 0.25978-0.29745-0.29228
  -2 -14  -5    5.28    4.36   1-0.78206-0.87113 0.25691-0.44012-0.56777-0.21776
  -2  14  -5   -2.97    3.90   1-0.57693-0.07222-0.00989 0.59161 0.81673 0.80297
   2  14   5    0.93    4.22   1-0.60129-0.50912 0.04142 0.73697 0.79795 0.44460
   2 -14   6    1.27    4.40   1-0.36959-0.90729 0.89075 0.29359-0.26447-0.30103
  -2 -14  -6    2.79    3.73   1-0.79211-0.84916 0.20427-0.49548-0.57517-0.18280
  -2  14  -6    2.94    4.02   1-0.59985-0.06287-0.03951 0.55907 0.79913 0.82673
   2  14   6    7.03    3.16   1-0.59969-0.53974 0.03930 0.73818 0.79926 0.40466
   2 -14   7   -1.19    3.65   1-0.32478-0.89425 0.91701 0.32299-0.23152-0.30982
  -2 -14  -7   -0.94    4.33   1-0.79923-0.82428 0.15608-0.54689-0.58040-0.14649
  -2  14  -7    1.70    4.00   1-0.62211-0.05286-0.06956 0.52610 0.77982 0.84877
   2  14   7    2.38    3.93   1-0.59605-0.56833 0.03451 0.73673 0.80220 0.36635
   2 -14   8    3.64    5.05   1-0.28028-0.88152 0.93910 0.34823-0.19879-0.31883
  -2 -14  -8    3.68    4.24   1-0.80402-0.79708 0.11214-0.59404-0.58392-0.10847
  -2  14  -8    9.10    3.75   1-0.64359-0.04206-0.09993 0.49282 0.75881 0.86911
   2  14   8    2.53    4.51   1-0.59064-0.59515 0.02746 0.73301 0.80646 0.32936
   2 -14   9    3.96    4.44   1-0.23629-0.86929 0.95731 0.36958-0.16644-0.32822
  -2 -14  -9   -3.89    4.13   1-0.80697-0.76804 0.07274-0.63665-0.58609-0.06910
  -2  14  -9   -6.74    4.71   1-0.66416-0.03036-0.13051 0.45932 0.73610 0.88775
   2  14   9    0.52    4.29   1-0.58364-0.62039 0.01844 0.72732 0.81179 0.29344
   2 -14  10    1.03    4.23   1-0.19293-0.85770 0.97194 0.38735-0.13456-0.33807
  -2 -14 -10   -7.67    4.69   1-0.80852-0.73760 0.03799-0.67461-0.58723-0.02870
  -2  14 -10   -3.23    4.14   1-0.68373-0.01765-0.16122 0.42569 0.71170 0.90469
   2  14  10    5.86    5.06   1-0.57519-0.64417 0.00770 0.71992 0.81797 0.25837
  -2 -16   7    3.07    5.71   1-0.39219-0.90528 0.87588 0.12402-0.28108-0.40629
   2  16  -7   -1.94    5.39   1-0.70056-0.18735-0.18915 0.56443 0.68806 0.80393
  -2  16   7    3.43    5.85   1-0.65661-0.48838 0.11911 0.84714 0.74475 0.20931
  -2 -16   6    5.27    4.32   1-0.43302-0.91434 0.84599 0.09098-0.31111-0.39458
   2  16  -6   -2.50    5.64   1-0.68750-0.20657-0.16734 0.58916 0.70663 0.78115
  -2  16   6    3.69    4.55   1-0.66249-0.46203 0.12796 0.85267 0.73805 0.24386
  -2 -16   5    0.41    3.50   1-0.47292-0.92247 0.81266 0.05452-0.34045-0.38218
   2 -16  -5    0.25    4.41   1-0.72601-0.95618 0.44230-0.28206-0.52656-0.07838
   2  16  -5    2.67    3.98   1-0.67430-0.22565-0.14621 0.61321 0.72382 0.75699
  -2  16   5    1.08    3.60   1-0.66698-0.43429 0.13483 0.85620 0.73277 0.27983
  -2 -16   4   12.30    4.55   1-0.51130-0.92956 0.77629 0.01528-0.36867-0.36834
   2 -16  -4    3.36    3.84   1-0.70537-0.96746 0.49085-0.23028-0.51138-0.10481
   2  16  -4    6.84    5.38   1-0.66112-0.24474-0.12589 0.63645 0.73963 0.73145
  -2  16   4    5.03    4.37   1-0.66991-0.40500 0.13936 0.85740 0.72923 0.31754
  -2 -16   3    1.59    4.00   1-0.54843-0.93484 0.73649-0.02771-0.39598-0.35397
   2 -16  -3    8.77    4.02   1-0.68155-0.97556 0.53998-0.17793-0.49386-0.12891
   2  16  -3   -2.91    5.30   1-0.64811-0.26401-0.10652 0.65874 0.75405 0.70452
  -2  16   3    1.29    3.11   1-0.45897-0.17043 0.12644 0.84397 0.87940 0.50857
  -2  16   3    0.00    5.00   1-0.67105-0.37390 0.14112 0.85583 0.72785 0.35741
  -2 -16   2    0.12    5.87   1-0.58363-0.93819 0.69383-0.07356-0.42186-0.33818
   2 -16  -2   -0.06    4.59   1-0.65454-0.98045 0.58897-0.12597-0.47400-0.15113
   2  16  -2   -2.59    5.15   1-0.63545-0.28362-0.08825 0.67993 0.76707 0.67619
  -2  16   2    0.00    3.99   1-0.47402-0.15320 0.11029 0.82491 0.87357 0.54409
  -2 -16   1    7.26    4.02   1-0.61657-0.93929 0.64872-0.12186-0.44608-0.32073
   2 -16  -1    7.17    3.47   1-0.62468-0.98243 0.63673-0.07502-0.45204-0.17084
   2  16  -1    2.96    3.97   1-0.62333-0.30378-0.07125 0.69985 0.77869 0.64647
  -2  16   1    3.09    4.64   1-0.49039-0.13729 0.09237 0.80406 0.86659 0.57846
   2 -16   0    7.63    4.80   1-0.59211-0.98171 0.68273-0.02583-0.42810-0.18857
  -2 -16   0   -0.29    4.70   1-0.64696-0.93783 0.60167-0.17210-0.46843-0.30140
   2  16   0   -0.07    4.95   1-0.61199-0.32470-0.05573 0.71829 0.78889 0.61531
  -2  16   0    1.37    4.62   1-0.50780-0.12243 0.07284 0.78162 0.85838 0.61161
   2 -16   1   13.73    3.75   1-0.55718-0.97862 0.72636 0.02098-0.40241-0.20456
  -2 -16  -1    2.41    3.17   1-0.67447-0.93378 0.55343-0.22330-0.48866-0.27961
   2  16   1    3.59    4.33   1-0.60166-0.34666-0.04191 0.73502 0.79764 0.58271
  -2  16  -1    2.16    3.67   1-0.52601-0.10836 0.05190 0.75776 0.84889 0.64346
   2 -16   2  -10.70    4.74   1-0.52025-0.97354 0.76715 0.06496-0.37525-0.21907
  -2 -16  -2    7.36    3.92   1-0.69912-0.92651 0.50436-0.27561-0.50679-0.25613
   2  16   2   -2.65    5.00   1-0.59265-0.36992-0.03007 0.74978 0.80489 0.54861
  -2  16  -2    4.87    6.00   1-0.54479-0.09487 0.02970 0.73264 0.83804 0.67396
   2 -16   3   12.21    4.26   1-0.48171-0.96685 0.80473 0.10573-0.34691-0.23241
  -2 -16  -3   12.13    5.12   1-0.72073-0.91620 0.45535-0.32784-0.52267-0.23041
  -2  16  -3    3.89    4.65   1-0.56392-0.08173 0.00638 0.70640 0.82579 0.70307
   2  16   3    8.42    3.72   1-0.55749-0.35771-0.01430 0.76681 0.83006 0.53295
   2 -16   4    1.59    5.63   1-0.44216-0.95883 0.83872 0.14262-0.31783-0.24553
  -2 -16  -4   -0.65    5.88   1-0.73930-0.90285 0.40713-0.37928-0.53633-0.20246
  -2  16  -4    0.01    4.90   1-0.58323-0.06875-0.01791 0.67919 0.81210 0.73073
   2  16   4    1.71    4.92   1-0.56387-0.39632-0.00645 0.77800 0.82583 0.48748
   2 -16   5    1.83    4.17   1-0.40161-0.95005 0.86933 0.17637-0.28801-0.25745
  -2 -16  -5   14.23    4.08   1-0.75496-0.88659 0.36040-0.42923-0.54784-0.17236
  -2  16  -5    0.94    6.21   1-0.60252-0.05577-0.04305 0.65113 0.79693 0.75691
   2  16   5   -1.05    4.06   1-0.56693-0.43161-0.00265 0.78513 0.82375 0.44415
   2 -16   6   13.26    4.54   1-0.36051-0.94072 0.89641 0.20660-0.25779-0.26897
  -2 -16  -6    6.60    4.08   1-0.76788-0.86759 0.31578-0.47708-0.55734-0.14025
  -2  16  -6    4.63    5.18   1-0.62164-0.04262-0.06892 0.62234 0.78025 0.78158
   2  16   6    0.61    3.57   1-0.56728-0.46420-0.00220 0.78891 0.82351 0.40266
   2 -16   7   -0.10    6.07   1-0.31914-0.93112 0.92002 0.23335-0.22736-0.28028
  -2 -16  -7    1.00    5.05   1-0.77831-0.84611 0.27380-0.52229-0.56502-0.10631
  -2  16  -7    3.91    5.15   1-0.64045-0.02916-0.09540 0.59293 0.76204 0.80471
   2  16   7   -6.27    4.36   1-0.56537-0.49451-0.00458 0.78986 0.82482 0.36271
  -3  -1  17    2.10    3.45   1 0.34498-0.14354 0.90159 0.86090 0.26099-0.48809
   3  -1 -17    1.63    4.87   1-0.44186 0.00539-0.83897-0.88988-0.31761 0.45614
  -3  -1  16    8.12    3.53   1 0.31740-0.13926 0.91722 0.87334 0.24071-0.46676
   3  -1 -16    4.23    4.42   1-0.42109-0.00574-0.85514-0.90287-0.30233 0.42986
   3   1 -16   10.43    3.45   1-0.77965-0.31569-0.62413-0.57565 0.05098 0.75429
  -3   1  16   -0.99    5.46   1-0.57324-0.99431 0.00524 0.05490 0.81936 0.09123
  -3   1  15    2.51    2.87   1 0.39042 0.00796 0.87228 0.91788 0.29441-0.39675
  -3  -1  15    7.10    2.92   1 0.28902-0.13579 0.93173 0.88465 0.21984-0.44603
   3  -1 -15    4.84    3.13   1-0.74262-0.35291-0.66548-0.70681-0.07510 0.61308
   3   1 -15    8.49    4.08   1-0.78761-0.35594-0.60996-0.55856 0.08724 0.74920
  -3   1  15    5.79    3.79   1-0.60109-0.98993 0.04116 0.08748 0.79811 0.11123
  -3   1  14   81.57    3.90   1 0.36963 0.01902 0.88625 0.92866 0.27912-0.37044
  -3  -1  14   59.99    6.39   1 0.25966-0.13329 0.94512 0.89484 0.19825-0.42601
   3  -1 -14   70.22    4.18   1-0.75223-0.39481-0.65723-0.69564-0.04667 0.60017
   3   1 -14   66.29    6.56   1-0.79409-0.39471-0.59543-0.54111 0.12193 0.74256
  -3  -1  14   68.07    6.49   1-0.58047-0.98022 0.01439-0.03485 0.81414 0.19477
  -3   1  14   65.04    6.35   1-0.62771-0.98432 0.07734 0.12033 0.77459 0.12896
  -3   1  13   -3.76    3.79   1 0.34888 0.03012 0.89925 0.93845 0.26386-0.34409
  -3  -1  13   -1.12    2.99   1 0.22913-0.13198 0.95738 0.90390 0.17580-0.40686
   3  -1 -13   -2.00    3.10   1-0.76033-0.43519-0.64920-0.68468-0.02085 0.58464
   3   1 -13    2.41    3.72   1-0.79923-0.43214-0.58066-0.52342 0.15507 0.73435
  -3  -1  13    1.73    3.26   1-0.60955-0.97707 0.05244-0.00013 0.79100 0.21287
  -3   1  13   -2.17    3.36   1-0.65316-0.97755 0.11397 0.15362 0.74858 0.14420
  -3   1  12   48.36    4.18   1 0.32820 0.04129 0.91129 0.94729 0.24865-0.31769
  -3  -1  12   49.70    4.23   1 0.19712-0.13213 0.96848 0.91180 0.15226-0.38879
   3  -1 -12   54.61    4.91   1-0.76701-0.47416-0.64162-0.67419 0.00208 0.56624
   3   1 -12   42.50    4.55   1-0.80316-0.46841-0.56577-0.50552 0.18663 0.72459
  -3  -1  12   54.15    4.86   1-0.63773-0.97302 0.09150 0.03558 0.76480 0.22792
  -3   1  12   42.87    4.42   1-0.67732-0.96980 0.15097 0.18680 0.72002 0.15679
  -3   1  11   -0.42    2.55   1 0.30762 0.05256 0.92240 0.95520 0.23352-0.29122
  -3  -1  11   -2.28    2.94   1 0.16325-0.13415 0.97833 0.91844 0.12735-0.37209
   3  -1 -11    0.15    2.55   1-0.77236-0.51179-0.63481-0.66445 0.02176 0.54457
   3   1 -11    3.51    3.06   1-0.80598-0.50351-0.55090-0.48773 0.21654 0.71315
  -3  -1  11   -1.20    2.65   1-0.66514-0.96820 0.13201 0.07275 0.73495 0.23932
  -3   1  11    1.82    3.31   1-0.70063-0.96085 0.18927 0.22181 0.68796 0.16599
  -3   1  10   46.25    3.66   1 0.28719 0.06398 0.93261 0.96222 0.21849-0.26464
  -3  -1  10   50.97    3.64   1 0.12624-0.13839 0.98693 0.92309 0.10015-0.35879
   3  -1 -10   54.62    3.29   1-0.77641-0.54813-0.62910-0.65582 0.03760 0.51907
   3   1 -10   55.79    3.90   1-0.80783-0.53763-0.53622-0.47014 0.24468 0.69994
  -3  -1  10   50.69    3.68   1-0.69173-0.96275 0.17430 0.11128 0.70080 0.24639
  -3   1  10   55.04    3.68   1-0.72282-0.95080 0.22887 0.25813 0.65202 0.17131
  -3   1   9    8.00    2.20   1 0.26698 0.07563 0.94194 0.96833 0.20363-0.23790
  -3  -1   9    6.31    2.24   1 0.08670-0.14617 0.99369 0.92672 0.07106-0.34613
   3  -1  -9    9.68    2.82   1-0.77913-0.58314-0.62494-0.64875 0.04880 0.48893
   3   1  -9   12.80    2.00   1-0.80882-0.57090-0.52195-0.45295 0.27085 0.68476
  -3  -1   9    5.12    2.24   1-0.71791-0.95668 0.21979 0.15348 0.66052 0.24737
  -3   1   9   11.04    3.29   1-0.74382-0.93954 0.27020 0.29617 0.61132 0.17186
  -3   1   8  246.38    7.12   1 0.24711 0.08761 0.95037 0.97357 0.18902-0.21090
  -3  -1   8  250.11    7.16   1 0.04281-0.15830 0.99832 0.92822 0.03879-0.33665
   3  -1  -8  260.17    7.28   1-0.78040-0.61670-0.62291-0.64379 0.05420 0.45298
   3   1  -8  232.03    6.89   1-0.80910-0.60345-0.50838-0.43645 0.29478 0.66734
  -3  -1   8  252.39    7.28   1-0.74340-0.94992 0.26931 0.19972 0.61222 0.24033
  -3   1   8  222.36    6.48   1-0.76340-0.92686 0.31382 0.33650 0.56456 0.16636
  -3   1   7   18.87    2.48   1 0.22775 0.10011 0.95790 0.97790 0.17479-0.18353
  -3  -1   7   17.75    2.41   1-0.00717-0.17653 0.99997 0.92672 0.00203-0.33167
   3  -1  -7   17.76    2.77   1-0.77990-0.64849-0.62372-0.64168 0.05206 0.40950
   3   1  -7   19.99    2.34   1-0.80883-0.63546-0.49589-0.42105 0.31601 0.64722
  -3  -1   7   17.48    2.83   1-0.76779-0.94205 0.32456 0.25168 0.55240 0.22177
  -3   1   7   20.56    3.23   1-0.78111-0.91232 0.36045 0.37985 0.50983 0.15290
  -3   1   6   81.07    3.55   1 0.20923 0.11344 0.96449 0.98129 0.16117-0.15555
  -3  -1   6   78.62    3.65   1-0.06606-0.20367 0.99696 0.92058-0.04127-0.33323
   3  -1  -6   76.86    3.63   1-0.77695-0.67782-0.62829-0.64333 0.03981 0.35590
   3   1  -6   84.57    4.04   1-0.80822-0.66712-0.48507-0.40731 0.33386 0.62372
  -3  -1   6   83.14    3.89   1-0.78983-0.93183 0.38793 0.31176 0.47505 0.18568
  -3   1   6   76.65    3.70   1-0.79605-0.89500 0.41099 0.42710 0.44427 0.12860
  -3   1   5    3.67    2.15   1 0.19216 0.12822 0.97004 0.98364 0.14861-0.12650
  -3  -1   5    3.19    2.52   1-0.13853-0.24437 0.98583 0.90631-0.09455-0.34477
   3  -1  -5    3.56    2.09   1-0.77014-0.70329-0.63772-0.64985 0.01345 0.28821
   3   1  -5    3.34    2.45   1-0.80753-0.69871-0.47676-0.39609 0.34723 0.59574
  -3   1   5    4.11    2.07   1-0.80642-0.87330 0.46650 0.47898 0.36338 0.08898
  -3  -1   5    0.82    1.74   1-0.80592-0.91581 0.46251 0.38274 0.36954 0.12159
  -3   1   4   10.95    2.05   1 0.17791 0.14582 0.97430 0.98470 0.13813-0.09537
  -3  -1   4   16.64    2.79   1-0.23240-0.30657 0.95876 0.87611-0.16358-0.37205
   3  -1  -4   11.05    2.25   1-0.75654-0.72198-0.65310-0.66230-0.03317 0.20023
   3   1  -4   10.26    2.73   1-0.80709-0.73054-0.47233-0.38873 0.35425 0.56141
  -3   1   4   12.14    2.39   1-0.80850-0.84309 0.52784 0.53709 0.26019 0.02705
  -3  -1   4   11.90    2.22   1-0.80592-0.88352 0.55128 0.46828 0.21579 0.00909
  -3   1   3   27.23    2.39   1 0.17026 0.17002 0.97644 0.98364 0.13251-0.05939
  -3  -1   3   26.61    2.87   1-0.36121-0.40362 0.89599 0.81020-0.25830-0.42504
   3  -1  -3   35.08    3.41   1-0.72996-0.72769-0.67464-0.68092-0.10957 0.08248
   3   1  -3   30.29    2.70   1-0.80727-0.76299-0.47406-0.38754 0.35153 0.51734
  -3   1   3   33.18    3.06   1-0.79448-0.79677 0.59445 0.60046 0.12420-0.06767
  -3  -1   3   31.53    2.90   1-0.76118-0.80650 0.64828 0.56204-0.01799-0.18344
  -3   1   2   -0.13    2.74   1 0.18494 0.21656 0.97224 0.97624 0.14330-0.00699
   3  -1  -2    1.84    1.98   1-0.11725-0.14919 0.98996 0.98622-0.07891 0.07144
  -3  -1   2    0.03    2.13   1-0.53918-0.55009 0.74686 0.65802-0.38918-0.51419
   3  -1  -2   -2.38    2.23   1-0.67741-0.70743-0.69902-0.70242-0.22909-0.07833
   3   1  -2    3.15    2.45   1-0.80829-0.79629-0.48605-0.39661 0.33227 0.45673
  -3   1   2   -1.84    2.17   1-0.74834-0.71834 0.66073 0.66351-0.05846-0.20908
  -3  -1   2    1.59    1.79   1-0.60721-0.62023 0.71141 0.62195-0.35380-0.47799
  -3  -1   1    2.68    2.24   1-0.73974-0.71903 0.40592 0.31388-0.53666-0.62004
   3  -1  -1    2.77    2.16   1-0.57479-0.63709-0.71223-0.71271-0.40290-0.29349
   3   1  -1    2.21    2.19   1-0.80901-0.82929-0.51626-0.42391 0.28100 0.36411
   3   1  -1    2.85    1.96   1 0.28645 0.26764-0.65524-0.56263 0.69900 0.78218
  -3   1   1    3.08    2.40   1-0.64183-0.57955 0.70742 0.70697-0.29597-0.40533
   3  -1   0    2.28    1.73   1 0.20880 0.11348 0.96463 0.96703 0.16085 0.22794
  -3   1   0    0.81    1.56   1-0.08170 0.01375 0.99525 0.99272-0.05277-0.11964
  -3  -1   0    1.68    2.24   1-0.80372-0.75124-0.11537-0.21072-0.58370-0.62547
   3  -1   0    0.20    2.39   1-0.39100-0.48558-0.68101-0.67862-0.61913-0.55106
   3   1   0    2.73    3.68   1-0.79915-0.85177-0.58094-0.48573 0.15447 0.19629
   3   1   0    2.93    2.20   1-0.04352-0.09469-0.47798-0.38201 0.87728 0.91929
  -3   1   0    0.59    1.90   1-0.44854-0.35397 0.69608 0.69240-0.56059-0.62870
   3  -1   1    0.39    3.56   1 0.13036 0.00318 0.98608 0.99168 0.10317 0.12866
  -3  -1  -1    0.44    2.01   1-0.69667-0.61241-0.50953-0.60829-0.50499-0.50489
   3  -1   1    0.90    2.45   1-0.12763-0.25451-0.56897-0.56378-0.81239-0.78572
   3   1   1   -0.78    2.44   1-0.70003-0.78494-0.69068-0.59257-0.18138-0.18086
  -3  -1  -1    0.22    1.95   1-0.79212-0.70721-0.60022-0.69834 0.11075 0.11027
   3  -1   1    0.61    1.91   1 0.19487 0.06822-0.61503-0.60772 0.76403 0.79121
   3   1   1    0.14    2.01   1-0.26284-0.34633-0.31231-0.21299 0.91289 0.91361
   3  -1   2   -0.45    2.14   1 0.12513-0.03389 0.98715 0.99595 0.09932 0.08320
  -3  -1  -2    0.54    2.24   1-0.57704-0.46087-0.70222-0.80417-0.41701-0.37536
   3  -1   2    0.44    2.13   1 0.14462-0.01444-0.39303-0.38499-0.90807-0.92280
   3   1   2    1.12    1.67   1-0.04055-0.15778-0.51895-0.41800-0.85383-0.89463
  -3  -1  -2    1.45    1.48   1-0.59141-0.47422-0.71213-0.81316-0.37827-0.33745
   3  -1   2   -0.08    2.34   1-0.03003-0.18894-0.48692-0.47624 0.87292 0.85877
   3   1   2    0.09    2.27   1-0.38440-0.50007-0.20210-0.09939 0.90077 0.86025
   3  -1   3    1.06    1.91   1 0.13439-0.05649 0.98522 0.99722 0.10613 0.04841
  -3  -1  -3    0.47    2.62   1-0.49588-0.34780-0.79145-0.89659-0.35733-0.27412
   3  -1   3    0.59    2.17   1 0.35831 0.16700-0.21221-0.20127-0.90916-0.96519
  -3  -1  -3    0.84    1.63   1 0.00672 0.15616-0.48933-0.59310-0.87207-0.78983
  -3  -1  -3    1.97    1.91   1-0.60265-0.45328-0.04322-0.14725 0.79682 0.87911
   3  -1   3    0.45    2.06   1-0.18654-0.37768-0.37444-0.36037 0.90829 0.85292
   3   1   3    1.78    2.37   1-0.45046-0.59832-0.13544-0.02934 0.88246 0.80071
   3  -1   4   10.86    2.25   1 0.14894-0.07379 0.98191 0.99712 0.11683 0.01750
  -3  -1  -4   16.06    3.01   1-0.44623-0.26624-0.83543-0.94375-0.32082-0.19605
  -3  -1  -4   13.68    2.62   1-0.74032-0.55867-0.26298-0.36993 0.61867 0.74231
  -3   1  -4   15.98    2.27   1-0.50313-0.27944 0.07813 0.06386 0.86066 0.95803
   3  -1   4   11.18    2.42   1-0.28506-0.50836-0.29325-0.27589 0.91254 0.81575
   3   1   4   14.39    2.69   1-0.48652-0.66657-0.09664 0.01284 0.86830 0.74532
   3  -1   5   51.09    3.13   1 0.16600-0.08858 0.97760 0.99600 0.12938-0.01155
  -3  -1  -5   51.77    3.18   1-0.41711-0.20522-0.85811-0.96962-0.29941-0.13308
  -3  -1  -5   43.73    2.66   1-0.77934-0.56542-0.35532-0.46519 0.51610 0.68109
  -3   1  -5   40.29    2.41   1-0.60135-0.34538-0.04149-0.05869 0.79790 0.93662
   3  -1   5   48.97    2.82   1-0.34402-0.59951-0.24037-0.21963 0.90767 0.76964
   3   1   5   50.76    3.17   1-0.50517-0.71777-0.07583 0.03677 0.85967 0.69530
   3   1   6   17.63    2.27   1 0.39262 0.14841 0.87075 0.98497 0.29602 0.08832
   3  -1   6   19.24    2.28   1 0.18443-0.10200 0.97239 0.99399 0.14293-0.03960
  -3  -1  -6   16.77    2.14   1-0.79604-0.54985-0.41096-0.52375 0.44431 0.65064
  -3   1  -6   16.56    2.22   1-0.66775-0.37951-0.13601-0.15613 0.73185 0.91191
   3  -1   6   17.04    2.31   1-0.37873-0.66641-0.20758-0.18344 0.90192 0.72266
   3   1   6   22.88    2.69   1-0.51362-0.75845-0.06622 0.04971 0.85545 0.64983
   3   1   7  107.57    4.06   1 0.38559 0.10965 0.87562 0.99310 0.29086 0.04141
   3  -1   7  117.53    4.31   1 0.20369-0.11459 0.96634 0.99114 0.15710-0.06704
  -3  -1  -7  103.17    4.37   1-0.80436-0.52589-0.45175-0.56746 0.38588 0.63357
  -3   1  -7  106.94    4.15   1-0.71383-0.39331-0.21239-0.23542 0.66733 0.88875
   3  -1   7  119.62    4.14   1-0.39798-0.71785-0.18882-0.16130 0.89774 0.67725
   3   1   7  112.27    4.12   1-0.51513-0.79219-0.06448 0.05478 0.85467 0.60780
   3   1   8   85.89    3.96   1 0.38450 0.07671 0.87636 0.99705 0.29005-0.00099
   3  -1   8   92.97    3.85   1 0.22348-0.12665 0.95947 0.98747 0.17165-0.09409
  -3  -1  -8   89.11    4.09   1-0.80822-0.49748-0.48501-0.60363 0.33396 0.62300
  -3   1  -8   85.88    3.83   1-0.74650-0.39371-0.27582-0.30177 0.60552 0.86828
   3  -1   8   84.41    3.86   1-0.40691-0.75897-0.17998-0.14906 0.89556 0.63382
   3   1   8   90.76    4.27   1-0.51175-0.82104-0.06835 0.05425 0.85640 0.56827
   3   1   9   51.03    3.84   1 0.38774 0.04809 0.87414 0.99803 0.29243-0.04021
   3  -1   9   52.14    3.47   1 0.24363-0.13836 0.95177 0.98297 0.18646-0.12089
  -3  -1  -9   52.16    3.54   1-0.80906-0.46604-0.51378-0.63532 0.28537 0.61576
  -3   1  -9   56.72    3.62   1-0.76989-0.38483-0.32987-0.35874 0.54629 0.85041
   3  -1   9   56.19    3.68   1-0.40859-0.79284-0.17830-0.14400 0.89512 0.59216
   3   1   9   49.16    3.13   1-0.50469-0.84621-0.07637 0.04956 0.85991 0.53053
   3   1  10    4.97    2.51   1 0.39404 0.02238 0.86975 0.99677 0.29707-0.07701
   3  -1  10    4.59    2.26   1 0.26401-0.14983 0.94324 0.97764 0.20145-0.14750
  -3  -1 -10    7.65    2.08   1-0.80748-0.43219-0.53955-0.66401 0.23842 0.61015
  -3   1 -10    4.95    1.76   1-0.78651-0.36917-0.37696-0.40875 0.48917 0.83464
   3  -1  10    2.23    2.30   1-0.40491-0.82135-0.18196-0.14427 0.89606 0.55186
   3   1  10    5.45    2.59   1-0.49471-0.86845-0.08757 0.04169 0.86463 0.49400
   3  -1  11   13.22    3.85   1 0.28457-0.16113 0.93387 0.97147 0.21657-0.17399
  -3  -1 -11   10.38    2.74   1-0.41172-0.00838-0.86208-0.99271-0.29545 0.12023
  -3  -1 -11    9.91    2.47   1-0.80374-0.39617-0.56310-0.69048 0.19212 0.60520
  -3   1 -11    8.54    2.67   1-0.79790-0.34829-0.41872-0.45343 0.43360 0.82042
   3  -1  11   12.96    2.78   1-0.39707-0.84570-0.18972-0.14864 0.89796 0.51252
   3   1  11    9.55    2.43   1-0.48281-0.88820-0.10072 0.03249 0.86990 0.45829
   3  -1  12    5.17    2.74   1 0.30524-0.17231 0.92363 0.96444 0.23177-0.20040
  -3  -1 -12    2.79    2.67   1-0.42236 0.01288-0.85418-0.98799-0.30327 0.15396
  -3  -1 -12   -1.06    2.51   1-0.79799-0.35793-0.58459-0.71484 0.14643 0.60073
  -3   1 -12   -1.30    2.86   1-0.80505-0.32317-0.45628-0.49391 0.37906 0.80722
   3  -1  12    0.41    2.69   1-0.38583-0.86666-0.20071-0.15624 0.90046 0.47380
   3   1  12    0.72    3.04   1-0.46832-0.90590-0.11645 0.02015 0.87584 0.42299
   3  -1  13   16.17    3.88   1 0.32599-0.18341 0.91252 0.95652 0.24703-0.22674
  -3  -1 -13   15.20    3.37   1-0.43443 0.03272-0.84488-0.98188-0.31214 0.18664
  -3   1 -13   14.24    3.03   1-0.80857-0.29441-0.49044-0.53098 0.32507 0.79459
   3  -1  13   22.91    3.06   1-0.37171-0.88472-0.21431-0.16645 0.90326 0.43536
   3   1  13   16.09    3.73   1-0.45192-0.92169-0.13390 0.00609 0.88194 0.38786
   3  -1  14    5.66    3.87   1 0.34680-0.19446 0.90050 0.94770 0.26233-0.25305
  -3  -1 -14   12.01    3.39   1-0.44762 0.05144-0.83429-0.97447-0.32184 0.21850
  -3   1 -14    6.38    2.86   1-0.80883-0.26239-0.52174-0.56520 0.27124 0.78210
   3  -1  14    7.57    3.16   1-0.35503-0.90024-0.23010-0.17885 0.90608 0.39695
   3   1  14    8.01    3.67   1-0.43374-0.93570-0.15282-0.00944 0.88798 0.35266
   3  -1  15    5.20    2.93   1 0.36764-0.20547 0.88755 0.93795 0.27765-0.27933
  -3  -1 -15   10.91    4.30   1-0.46171 0.06926-0.82247-0.96584-0.33220 0.24970
   3  -1  15   10.55    3.70   1-0.33601-0.91340-0.24776-0.19312 0.90868 0.35831
   3   1  15   16.62    3.92   1-0.41384-0.94799-0.17305-0.02627 0.89374 0.31719
   3  -1  16    0.35    3.72   1 0.38850-0.21646 0.87362 0.92722 0.29299-0.30560
  -3  -1 -16   -2.29    5.26   1-0.47652 0.08635-0.80944-0.95599-0.34310 0.28037
   3   1  16    8.05    4.16   1-0.39225-0.95860-0.19444-0.04428 0.89906 0.28128
  -3  -1 -17    8.20    3.74   1-0.49193 0.10285-0.79522-0.94496-0.35443 0.31059
  -3   1 -17    3.17    5.03   1-0.41811 0.21951-0.85737-0.91478-0.30014 0.33908
  -3  -3  17    2.47    3.41   1 0.26399-0.26688 0.94325 0.80988 0.20144-0.52235
   3  -3 -17   -6.78    4.48   1-0.52999-0.12556-0.75687-0.90012-0.38241 0.41715
   3   3 -17    9.73    4.85   1-0.79639-0.25819-0.58931-0.45102 0.13591 0.85434
  -3   3  17   -0.77    4.32   1-0.57742-0.98757 0.01051 0.15574 0.81637 0.02074
  -3  -3  16   -0.78    4.60   1 0.23071-0.26830 0.95679 0.82022 0.17697-0.50521
   3  -3 -16   11.88    3.81   1-0.51622-0.14370-0.77130-0.91135-0.37229 0.38571
   3   3 -16    0.80    4.14   1-0.80194-0.29605-0.57088-0.42963 0.17600 0.85309
  -3   3  16   -5.94    4.87   1-0.60365-0.98158 0.04455 0.18645 0.79599 0.04161
  -3  -3  15   -1.08    4.11   1 0.19608-0.27108 0.96881 0.82904 0.15150-0.48907
   3  -3 -15    4.17    3.40   1-0.50331-0.16270-0.78424-0.92111-0.36280 0.35364
   3   3 -15   13.10    4.10   1-0.80584-0.33223-0.55177-0.40760 0.21483 0.85057
  -3   3  15    6.00    4.13   1-0.62856-0.97426 0.07853 0.21709 0.77377 0.06064
  -3  -3  14   39.59    4.57   1 0.15983-0.27548 0.97921 0.83625 0.12484-0.47412
   3  -3 -14   24.09    4.09   1-0.49147-0.18276-0.79565-0.92934-0.35409 0.32080
   3  -3 -14   35.92    3.88   1-0.66847-0.35310-0.70161-0.83279-0.24673 0.42634
   3   3 -14   44.34    4.38   1-0.80820-0.36686-0.53202-0.38493 0.25251 0.84689
  -3   3  14   28.80    4.24   1-0.65222-0.96568 0.11257 0.24779 0.74962 0.07773
  -3  -3  13    5.26    4.48   1 0.12113-0.28128 0.98794 0.84086 0.09638-0.46241
   3  -3 -13    1.33    2.44   1-0.48095-0.20416-0.80542-0.93592-0.34635 0.28697
   3  -3 -13    8.36    2.67   1-0.67635-0.39326-0.69934-0.82760-0.23121 0.40051
   3   3 -13    2.50    2.94   1-0.80909-0.40002-0.51165-0.36165 0.28909 0.84213
  -3   3  13    4.06    2.81   1-0.67466-0.95589 0.14677 0.27866 0.72338 0.09275
  -3  -3  12   10.74    3.65   1 0.08053-0.29012 0.99452 0.84430 0.06653-0.45052
   3  -3 -12    9.29    2.75   1-0.47212-0.22724-0.81338-0.94069-0.33986 0.25190
   3  -3 -12    8.19    2.75   1-0.68177-0.43096-0.69761-0.82295-0.22024 0.37014
   3   3 -12    5.29    3.24   1-0.80858-0.43180-0.49070-0.33777 0.32464 0.83633
  -3  -3  12    5.33    2.26   1-0.55331-0.93175-0.01940-0.16756 0.83274 0.32212
  -3   3  12    8.50    3.36   1-0.69572-0.94515 0.18096 0.30908 0.69513 0.10559
  -3  -3  11    4.37    3.26   1 0.03705-0.30184 0.99871 0.84535 0.03456-0.44075
   3  -3 -11    3.46    2.81   1-0.46546-0.25249-0.81922-0.94335-0.33497 0.21524
   3  -3 -11    8.64    2.84   1-0.68455-0.46602-0.69668-0.81910-0.21453 0.33451
   3   3 -11    3.12    3.21   1-0.80674-0.46223-0.46917-0.31333 0.35922 0.82955
  -3  -3  11    2.36    2.14   1-0.58405-0.93026 0.01897-0.13252 0.81149 0.34211
  -3   3  11    8.15    3.69   1-0.71581-0.93298 0.21596 0.34079 0.66406 0.11578
  -3  -3  10    5.28    2.24   1-0.00998-0.31713 0.99994 0.84345-0.00003-0.43360
   3  -3 -10    0.66    2.75   1-0.46165-0.28058-0.82252-0.94346-0.33216 0.17649
   3  -3 -10    0.88    2.56   1-0.68430-0.49805-0.69676-0.81626-0.21504 0.29265
   3   3 -10    1.93    2.23   1-0.80360-0.49136-0.44708-0.28832 0.39286 0.82184
  -3  -3  10    3.33    1.74   1-0.61470-0.92868 0.05940-0.09541 0.78651 0.35839
  -3   3  10    0.83    2.51   1-0.73466-0.91957 0.25160 0.37314 0.63005 0.12303
  -3  -3   9   24.55    3.11   1-0.06150-0.33688 0.99738 0.83775-0.03791-0.42974
   3  -3  -9   24.70    3.11   1-0.46163-0.31247-0.82253-0.94029-0.33215 0.13494
   3  -3  -9   19.11    2.86   1-0.68040-0.52643-0.69806-0.81465-0.22303 0.24332
   3   3  -9   23.01    3.64   1-0.79919-0.51923-0.42444-0.26276 0.42560 0.81323
  -3  -3   9   27.25    2.57   1-0.64579-0.92754 0.10313-0.05502 0.75651 0.36963
  -3   3   9   18.83    3.18   1-0.75219-0.90486 0.28811 0.40636 0.59261 0.12685
  -3  -3   8   16.50    2.81   1-0.11865-0.36228 0.98971 0.82693-0.07994-0.43002
   3  -3  -8   24.29    3.10   1-0.46682-0.34956-0.81805-0.93261-0.33596 0.08957
   3  -3  -8   19.03    2.62   1-0.67184-0.55014-0.70067-0.81434-0.24015 0.18486
   3   3  -8   17.73    2.63   1-0.79354-0.54585-0.40123-0.23664 0.45747 0.80376
  -3  -3   8   18.23    2.33   1-0.67809-0.92761 0.15219-0.00930 0.71904 0.37342
  -3   3   8   21.54    2.86   1-0.76826-0.88867 0.32575 0.44072 0.55104 0.12654
  -3  -3   7   42.42    3.57   1-0.18283-0.39483 0.97488 0.80901-0.12713-0.43543
   3  -3  -7   35.51    2.94   1-0.47932-0.39397-0.80691-0.91829-0.34516 0.03882
   3  -3  -7   33.89    2.68   1-0.65703-0.56761-0.70444-0.81519-0.26845 0.11521
   3   3  -7   34.59    2.93   1-0.78667-0.57125-0.37747-0.20996 0.48852 0.79346
  -3  -3   7   39.00    2.77   1-0.71257-0.92989 0.21014 0.04498 0.66937 0.36505
  -3   3   7   37.56    3.27   1-0.78260-0.87075 0.36487 0.47655 0.50437 0.12114
  -3  -3   6   21.96    2.48   1-0.25616-0.43640 0.94952 0.78050-0.18106-0.44762
   3  -3  -6   30.54    3.00   1-0.50242-0.44898-0.78512-0.89331-0.36214-0.01972
   3  -3  -6   27.18    2.60   1-0.63353-0.57639-0.70871-0.81654-0.31041 0.03191
   3   3  -6   21.30    2.85   1-0.77857-0.59542-0.35313-0.18269 0.51877 0.78235
  -3  -3   6   26.68    2.49   1-0.75057-0.93564 0.28456 0.11611 0.59636 0.33330
  -3   3   6   28.40    2.78   1-0.79475-0.85065 0.40584 0.51423 0.45128 0.10930
  -3  -3   5    6.71    2.49   1-0.34064-0.48910 0.90820 0.73603-0.24317-0.46800
   3  -3  -5    0.14    1.62   1-0.54123-0.51970-0.74459-0.84960-0.39068-0.08982
   3  -3  -5   -3.09    2.14   1-0.59776-0.57289-0.71192-0.81683-0.36858-0.06759
   3   3  -5   -1.26    2.46   1-0.76923-0.61836-0.32818-0.15482 0.54825 0.77048
  -3  -3   5   -1.52    1.66   1-0.79032-0.94313 0.38965 0.21791 0.47281 0.25101
  -3   3   5   -2.45    2.35   1-0.80395-0.82780 0.44919 0.55392 0.38972 0.08888
  -3  -3   4   21.51    2.76   1-0.43785-0.55454 0.84218 0.66688-0.31466-0.49774
   3  -3  -4   18.52    2.11   1-0.60315-0.61353-0.66777-0.76959-0.43621-0.17690
   3  -3  -4   15.15    2.23   1-0.54475-0.55217-0.71091-0.81291-0.44479-0.18514
   3   3  -4   17.90    2.35   1-0.75862-0.64003-0.30257-0.12630 0.57700 0.75789
  -3   3   4   17.28    2.35   1-0.80881-0.80037 0.49522 0.59672 0.31713 0.05755
  -3  -3   4   20.34    3.01   1-0.80647-0.92709 0.54763 0.37238 0.22293 0.04266
  -3  -3   3   13.44    2.58   1-0.54610-0.63139 0.73913 0.56082-0.39426-0.53555
   3  -3  -3   13.80    2.09   1-0.69428-0.73656-0.51452-0.61316-0.50322-0.28547
   3  -3  -3   12.00    2.24   1-0.46856-0.50826-0.70032-0.79945-0.53850-0.32020
   3   3  -3   13.13    2.79   1-0.74669-0.66037-0.27622-0.09703 0.60510 0.74463
  -3   3   3   20.69    2.83   1-0.80693-0.76621 0.54422 0.64248 0.22951 0.01119
  -3  -3   3   14.08    2.49   1-0.65019-0.73853 0.70588 0.52740-0.28101-0.42001
  -3  -3   2    5.67    2.72   1-0.65874-0.71218 0.58175 0.40025-0.47709-0.57670
   3  -3  -2    2.85    1.94   1-0.79172-0.86592-0.20656-0.30202-0.57488-0.39869
   3  -3  -2    5.58    2.72   1-0.36482-0.43679-0.67287-0.76909-0.64353-0.46658
   3   3  -2    4.78    2.48   1-0.73334-0.67930-0.24900-0.06689 0.63261 0.73080
   3   3  -2    2.07    2.84   1 0.16641 0.22314-0.60105-0.41978 0.78169 0.87976
  -3   3   2    6.43    2.44   1-0.79400-0.72099 0.59566 0.69069 0.12139-0.05566
  -3  -3   1   67.99    3.71   1-0.75397-0.77583 0.36355 0.17890-0.54712-0.60504
   3  -3  -1   52.82    3.14   1-0.77851-0.88434 0.27294 0.17976-0.56516-0.43083
   3  -3  -1   54.42    3.50   1-0.23295-0.33722-0.62130-0.71480-0.74814-0.61264
   3   3  -1   62.33    3.56   1-0.71839-0.69662-0.22066-0.03563 0.65971 0.71655
   3   3  -1   60.51    3.11   1-0.20994-0.18560-0.35592-0.17125 0.91062 0.96758
  -3   3   1   55.55    3.79   1-0.76237-0.65707 0.64698 0.73878-0.01401-0.14982
   3  -3   0    0.57    1.94   1-0.60066-0.73850 0.67120 0.58113-0.43438-0.34189
  -3  -3   0    1.87    1.98   1-0.80484-0.79495 0.10273-0.08516-0.58452-0.60065
   3  -3   0    0.86    2.66   1-0.08352-0.22004-0.54437-0.63496-0.83467-0.74054
   3   3   0    4.62    2.15   1-0.70147-0.71197-0.19071-0.00276 0.68670 0.70219
   3   3   0   -0.28    1.88   1-0.39960-0.40765-0.18722 0.00084 0.89736 0.91313
  -3   3   0    1.58    2.48   1-0.69968-0.56209 0.69083 0.77940-0.18216-0.27671
   3  -3   1  201.48    5.26   1-0.41461-0.58432 0.85996 0.77301-0.29757-0.24701
  -3  -3  -1  206.99    5.72   1-0.79994-0.75851-0.15038-0.34147-0.58092-0.55502
   3  -3   1  182.91    4.97   1 0.06912-0.09958-0.44760-0.53529-0.89155-0.83877
   3   3   1  192.68    4.96   1-0.68173-0.72451-0.15799 0.03286 0.71433 0.68847
   3   3   1  181.20    5.03   1-0.49240-0.53294-0.09014 0.10135 0.86568 0.84005
  -3   3  -1  174.49    5.69   1-0.59122-0.42135 0.71213 0.79747-0.37856-0.43185
   3  -3   2    2.82    1.97   1-0.28089-0.48238 0.93882 0.85501-0.19924-0.19042
  -3  -3  -2    3.97    2.64   1-0.75699-0.68365-0.35381-0.54809-0.54934-0.48188
   3  -3   2    3.01    2.80   1 0.21081 0.00988-0.34138-0.42619-0.91597-0.90457
   3   3   2    1.94    2.25   1-0.65659-0.73165-0.11908 0.07470 0.74478 0.67756
   3   3   2    3.37    2.43   1-0.53994-0.61271-0.03549 0.15934 0.84095 0.77407
  -3   3  -2    2.15    1.98   1-0.43369-0.23153 0.69259 0.77469-0.57638-0.58841
   3  -3   3    8.08    2.24   1-0.18573-0.41899 0.97405 0.89338-0.12927-0.16218
  -3  -3  -3    9.35    2.47   1-0.70199-0.59674-0.49823-0.69569-0.50889-0.39987
   3  -3   3    9.98    2.40   1 0.33314 0.09998-0.23575-0.31768-0.91292-0.94291
   3   3   3    9.60    1.67   1-0.61321-0.72054-0.05739 0.13931 0.78782 0.67926
   3  -3   3    9.48    2.04   1 0.25703 0.02254-0.64314-0.72110 0.72131 0.69246
   3   3   3    8.43    2.19   1-0.56475-0.66975-0.00535 0.19281 0.82524 0.71711
   3  -3   4   10.56    2.33   1-0.11401-0.37901 0.99052 0.91294-0.07652-0.15126
  -3  -3  -4    6.31    2.59   1-0.65097-0.51381-0.59500-0.79566-0.47138-0.32080
  -3  -3  -4    2.23    1.34   1 0.25179 0.39163-0.30754-0.50695-0.91761-0.76786
  -3   3  -4    7.06    2.52   1-0.43580-0.17007 0.15069 0.22910 0.88733 0.95842
   3  -3   4    5.75    1.81   1 0.09479-0.17197-0.56295-0.63750 0.82103 0.75100
   3   3   4    8.76    2.13   1-0.57685-0.71408 0.00979 0.21130 0.81678 0.66740
   3  -3   5   35.44    3.17   1-0.05634-0.35310 0.99782 0.92338-0.03411-0.15060
  -3  -3  -5   40.06    3.19   1-0.60962-0.44056-0.65870-0.86254-0.44097-0.24884
  -3   3  -5   37.67    2.74   1-0.51746-0.21946 0.06180 0.13729 0.85346 0.96591
   3   3   5   40.90    3.25   1-0.58113-0.75059 0.01523 0.22008 0.81366 0.62303
   3  -3   6   53.68    3.22   1-0.00772-0.33625 0.99996 0.92866 0.00162-0.15659
  -3  -3  -6   50.65    3.20   1-0.57843-0.37746-0.70046-0.90748-0.41804-0.18435
  -3   3  -6   54.53    3.36   1-0.58317-0.25289-0.01784 0.05472 0.81215 0.96594
   3   3   6   48.92    3.37   1-0.58019-0.78188 0.01403 0.22221 0.81435 0.58247
   3  -3   7   18.24    2.84   1 0.03481-0.32545 0.99885 0.93068 0.03291-0.16705
  -3  -3  -7   23.76    3.08   1-0.55610-0.32322-0.72763-0.93784-0.40161-0.12636
  -3   3  -7   23.97    2.50   1-0.63598-0.27342-0.08900-0.01936 0.76655 0.96169
   3  -3   7   22.15    2.34   1-0.17739-0.54075-0.38156-0.44598 0.90715 0.71322
   3   3   7   23.17    2.75   1-0.57550-0.80941 0.00808 0.21959 0.81776 0.54463
   3  -3   8  138.77    5.26   1 0.07313-0.31890 0.99544 0.93041 0.06109-0.18062
  -3  -3  -8  143.95    5.68   1-0.54099-0.27620-0.74487-0.95827-0.39050-0.07369
  -3   3  -8  143.57    5.58   1-0.67846-0.28363-0.15278-0.08605 0.71856 0.95506
   3  -3   8  133.15    4.99   1-0.21483-0.61042-0.35199-0.41301 0.91101 0.67586
   3   3   8  144.03    5.46   1-0.56792-0.83407-0.00141 0.21342 0.82307 0.50869
   3  -3   9   -1.40    2.69   1 0.10838-0.31541 0.99029 0.92839 0.08701-0.19644
  -3  -3  -9   -3.39    2.90   1-0.53165-0.23495-0.75509-0.97167-0.38363-0.02526
  -3  -3  -9   -1.48    1.63   1-0.68887-0.38768-0.69513-0.90935-0.20551 0.15091
  -3   3  -9   -1.30    2.38   1-0.71265-0.28555-0.21027-0.14647 0.66926 0.94710
   3  -3   9   -3.01    1.89   1-0.23844-0.66593-0.33273-0.39057 0.91237 0.63559
   3   3   9   -0.01    2.04   1-0.55802-0.85639-0.01365 0.20452 0.82971 0.47408
  -3  -3 -10   23.90    2.95   1-0.52690-0.19829-0.76017-0.97994-0.38014 0.01978
  -3   3 -10   20.75    3.51   1-0.74007-0.28069-0.26246-0.20157 0.61919 0.93839
   3  -3  10   20.30    2.44   1-0.25011-0.70979-0.32303-0.37748 0.91273 0.59472
   3   3  10   25.32    3.55   1-0.54614-0.87674-0.02807 0.19343 0.83722 0.44034
   3  -3  11    4.96    3.11   1 0.17301-0.31503 0.97568 0.92060 0.13454-0.23073
  -3  -3 -11   -2.25    2.53   1-0.52581-0.16529-0.76132-0.98428-0.37934 0.06214
  -3   3 -11    4.32    2.72   1-0.76187-0.27022-0.31016-0.25219 0.56863 0.92918
   3  -3  11    0.15    2.08   1-0.25368-0.74555-0.32004-0.37110 0.91280 0.55355
   3   3  11   -1.46    3.13   1-0.53251-0.89534-0.04429 0.18055 0.84526 0.40713
   3  -3  12   24.65    4.57   1 0.20284-0.31707 0.96662 0.91474 0.15647-0.25040
  -3  -3 -12   24.54    3.19   1-0.52765-0.13523-0.75937-0.98551-0.38069 0.10234
  -3   3 -12   30.54    4.02   1-0.77889-0.25496-0.35404-0.29899 0.51767 0.91956
   3  -3  12   25.16    3.45   1-0.25097-0.77504-0.32231-0.36998 0.91275 0.51227
   3   3  12   30.77    3.98   1-0.51728-0.91234-0.06201 0.16616 0.85356 0.37418
   3  -3  13    1.45    3.53   1 0.23156-0.32020 0.95647 0.90779 0.17759-0.27089
  -3  -3 -13   -0.27    3.98   1-0.53187-0.10754-0.75485-0.98417-0.38380 0.14080
  -3   3 -13    0.58    3.03   1-0.79174-0.23554-0.39463-0.34250 0.46627 0.90951
   3  -3  13   -4.36    2.41   1-0.24320-0.79945-0.32879-0.37307 0.91254 0.47083
   3   3  13    0.91    4.99   1-0.50054-0.92784-0.08104 0.15047 0.86190 0.34127
   3  -3  14   21.74    4.73   1 0.25938-0.32423 0.94524 0.89976 0.19804-0.29204
  -3  -3 -14   17.58    3.10   1-0.53803-0.08179-0.74814-0.98065-0.38833 0.17783
  -3   3 -14   14.37    3.08   1-0.80086-0.21239-0.43235-0.38314 0.41434 0.89894
   3   3  14   19.69    4.14   1-0.48293-0.94165-0.10059 0.13492 0.86985 0.30835
   3  -3  15    1.43    4.11   1 0.28646-0.32900 0.93296 0.89068 0.21796-0.31373
  -3  -3 -15   -2.16    2.88   1-0.54578-0.05763-0.73949-0.97520-0.39403 0.21369
  -3   3 -15    1.69    3.06   1-0.80655-0.18580-0.46754-0.42124 0.36176 0.88770
   3   3  15   -3.02    4.48   1-0.46336-0.95427-0.12177 0.11714 0.87776 0.27502
   3  -3  16   -4.64    4.72   1 0.31292-0.33440 0.91962 0.88054 0.23741-0.33588
  -3  -3 -16    3.54    3.88   1-0.55484-0.03479-0.72909-0.96798-0.40069 0.24858
   3   3  16    8.02    4.59   1-0.44236-0.96546-0.14390 0.09839 0.88521 0.24124
   3  -3  17    2.24    4.82   1 0.33885-0.34032 0.90520 0.86932 0.25648-0.35841
  -3  -3 -17   -3.23    5.76   1-0.56500-0.01304-0.71705-0.95912-0.40816 0.28267
   3   3  17    4.27    6.11   1-0.41990-0.97519-0.16694 0.07874 0.89208 0.20687
  -3  -5  16   20.14    4.02   1 0.15522-0.38615 0.98038 0.75113 0.12146-0.53543
   3  -5 -16   10.72    4.01   1-0.60555-0.27586-0.66443-0.89682-0.43798 0.34583
   3   5 -16   11.99    3.53   1-0.80881-0.26088-0.52214-0.28821 0.27052 0.92133
  -3   5  16    5.12    4.98   1-0.61923-0.95401 0.06560 0.29973 0.78245 0.00182
  -3  -5  15    1.29    2.83   1 0.11578-0.39265 0.98896 0.75548 0.09245-0.52446
   3  -5 -15   -0.54    3.83   1-0.59947-0.30169-0.67282-0.90202-0.43351 0.30874
   3   5 -15    2.56    4.02   1-0.80896-0.29331-0.49964-0.26280 0.30972 0.91918
  -3   5  15    6.19    3.26   1-0.64182-0.94437 0.09737 0.32817 0.76064 0.02125
  -3  -5  14   41.90    3.77   1 0.07483-0.40184 0.99524 0.75862 0.06234-0.51283
   3   5 -14   36.47    3.38   1-0.80750-0.32412-0.47639-0.23663 0.34782 0.91593
  -3   5  14   28.67    4.99   1-0.66316-0.93348 0.12899 0.35646 0.73727 0.03913
  -3  -5  13    5.44    3.06   1 0.03174-0.41318 0.99902 0.75927 0.03065-0.50278
   3  -5 -13    4.02    3.82   1-0.59295-0.35898-0.68162-0.90445-0.42871 0.23042
   3  -5 -13   -0.58    3.01   1-0.54008-0.29894-0.71055-0.93156-0.45102 0.20691
   3   5 -13    2.11    3.81   1-0.80446-0.35336-0.45241-0.20973 0.38490 0.91167
  -3   5  13    9.20    3.00   1-0.68309-0.92171 0.16018 0.38387 0.71254 0.05544
  -3  -5  12   24.91    3.48   1-0.01385-0.42701 0.99989 0.75700-0.00287-0.49456
   3  -5 -12   16.78    3.66   1-0.59334-0.39129-0.68109-0.90073-0.42900 0.18857
   3  -5 -12   13.28    2.98   1-0.54047-0.33161-0.71058-0.92868-0.45051 0.16608
   3   5 -12   17.10    2.61   1-0.79989-0.38106-0.42767-0.18207 0.42103 0.90644
  -3   5  12   15.24    3.79   1-0.70206-0.90843 0.19172 0.41213 0.68581 0.06997
  -3  -5  11    4.53    3.32   1-0.06237-0.44378 0.99730 0.75127-0.03855-0.48850
   3  -5 -11    0.55    2.02   1-0.59691-0.42676-0.67630-0.89275-0.43163 0.14439
   3  -5 -11    1.40    2.46   1-0.53631-0.35973-0.71022-0.92540-0.45601 0.11923
   3   5 -11    1.88    3.32   1-0.79379-0.40723-0.40216-0.15364 0.45624 0.90030
  -3   5  11    4.00    3.85   1-0.71984-0.89396 0.22334 0.44045 0.65722 0.08263
  -3  -5  10   23.41    3.94   1-0.11433-0.46397 0.99047 0.74130-0.07676-0.48496
   3  -5 -10   27.97    3.25   1-0.60438-0.46614-0.66606-0.87933-0.43712 0.09734
   3  -5 -10   31.55    2.90   1-0.52692-0.38262-0.70930-0.92156-0.46822 0.06568
   3   5 -10   28.42    2.99   1-0.78616-0.43188-0.37585-0.12441 0.49059 0.89330
  -3   5  10   27.96    3.07   1-0.73642-0.87829 0.25511 0.46894 0.62656 0.09324
  -3  -5   9   20.08    3.49   1-0.17027-0.48816 0.97831 0.72601-0.11789-0.48435
   3  -5  -9   14.47    2.57   1-0.61663-0.51030-0.64863-0.85872-0.44613 0.04677
   3  -5  -9   14.82    2.49   1-0.51137-0.39934-0.70744-0.91678-0.48787 0.00469
   3   5  -9   14.00    3.22   1-0.77698-0.45497-0.34869-0.09434 0.52412 0.88549
  -3   5   9   17.59    3.77   1-0.75177-0.86137 0.28716 0.49771 0.59361 0.10154
  -3  -5   8   90.20    3.86   1-0.23066-0.51695 0.95940 0.70400-0.16230-0.48695
   3  -5  -8   84.31    4.05   1-0.63469-0.56027-0.62136-0.82826-0.45941-0.00806
   3  -5  -8   71.49    3.84   1-0.48831-0.40858-0.70395-0.91043-0.51575-0.06453
   3   5  -8   78.25    4.14   1-0.76620-0.47647-0.32063-0.06335 0.55688 0.87690
  -3   5   8   80.95    4.03   1-0.76579-0.84315 0.31962 0.52687 0.55802 0.10722
  -3  -5   7   17.85    2.97   1-0.29635-0.55087 0.93156 0.67303-0.21061-0.49352
   3  -5  -7   12.85    2.54   1-0.65962-0.61710-0.58022-0.78394-0.47774-0.06795
   3  -5  -7   21.40    2.42   1-0.45647-0.40901-0.69782-0.90139-0.55196-0.14210
   3   5  -7   16.55    2.90   1-0.75376-0.49631-0.29157-0.03138 0.58891 0.86757
  -3   5   7   22.75    3.39   1-0.77839-0.82349 0.35262 0.55659 0.51938 0.10983
  -3  -5   6   30.79    3.27   1-0.36756-0.59031 0.89204 0.63036-0.26297-0.50415
   3  -5  -6   33.58    2.60   1-0.69207-0.68146-0.51906-0.71959-0.50160-0.13337
   3  -5  -6   40.28    2.96   1-0.41409-0.39890-0.68755-0.88820-0.59649-0.22797
   3   5  -6   24.74    3.10   1-0.73956-0.51437-0.26142 0.00168 0.62024 0.85756
  -3   5   6   31.47    3.21   1-0.78936-0.80221 0.38635 0.58704 0.47710 0.10881
  -3  -5   5    7.19    2.25   1-0.44414-0.63512 0.83713 0.57231-0.31928-0.51872
   3  -5  -5   10.72    2.21   1-0.73124-0.75254-0.42889-0.62623-0.53040-0.20373
   3  -5  -5    4.83    2.32   1-0.35963-0.37672-0.67117-0.86891-0.64821-0.32104
   3   5  -5    7.50    2.90   1-0.72344-0.53054-0.23002 0.03600 0.65092 0.84689
  -3   5   5    8.00    2.91   1-0.79843-0.77902 0.42101 0.61841 0.43040 0.10337
  -3  -5   4   -2.16    2.12   1-0.52426-0.68392 0.76296 0.49519-0.37820-0.53575
   3  -5  -4   -0.51    2.02   1-0.77249-0.82570-0.29802-0.49218-0.56074-0.27562
   3  -5  -4   -0.79    2.27   1-0.29219-0.34155-0.64652-0.84135-0.70471-0.41888
   3   5  -4   -0.92    2.20   1-0.70522-0.54459-0.19718 0.07175 0.68101 0.83562
  -3   5   4    1.44    2.50   1-0.80515-0.75370 0.45699 0.65074 0.37798 0.09196
  -3  -5   3   -0.47    2.52   1-0.60604-0.73386 0.66374 0.39279-0.43834-0.55421
   3  -5  -3    3.64    2.00   1-0.80345-0.88775-0.11823-0.31012-0.58350-0.34018
   3  -5  -3   -3.68    1.88   1-0.21114-0.29282-0.61122-0.80341-0.76276-0.51844
   3   5  -3    1.38    2.32   1-0.68460-0.55624-0.16263 0.10923 0.71054 0.82380
   3   5  -3    0.58    1.94   1 0.16086 0.29315-0.59825-0.32830 0.78499 0.89792
  -3   5   3    4.69    2.61   1-0.80876-0.72502 0.49421 0.68472 0.31882 0.07406
  -3  -5   2    6.73    2.27   1-0.68274-0.77907 0.53767 0.26363-0.49474-0.56879
   3  -5  -2    2.67    2.00   1-0.80429-0.92058 0.10906-0.07961-0.58412-0.38234
   3  -5  -2    2.18    2.11   1-0.12041-0.23433-0.56505-0.75431-0.81622-0.61326
   3   5  -2    4.51    1.92   1-0.66117-0.56509-0.12597 0.14881 0.73957 0.81149
   3   5  -2    7.18    1.63   1-0.26928-0.16971-0.30683-0.03341 0.91287 0.98492
  -3   5   2    3.64    2.52   1-0.80812-0.69209 0.53297 0.72025 0.25073 0.04723
  -3  -5   1   47.16    3.04   1-0.74700-0.81142 0.38499 0.10773-0.54199-0.57444
   3  -5  -1   41.04    2.81   1-0.75723-0.90562 0.35302 0.16723-0.54951-0.38971
   3  -5  -1   45.28    2.80   1-0.02288-0.16904-0.50809-0.69444-0.86100-0.69941
   3   5  -1   45.76    3.04   1-0.63433-0.57052-0.08666 0.19103 0.76818 0.79875
   3   5  -1   39.50    2.57   1-0.44852-0.38114-0.13747 0.13934 0.88313 0.91395
  -3   5   1   42.37    3.33   1-0.80134-0.65302 0.57323 0.75728 0.17103 0.00878
   3  -5   0   -1.46    1.99   1-0.66788-0.84825 0.56555 0.38283-0.48381-0.36592
  -3  -5   0    0.41    2.46   1-0.79026-0.82297 0.21499-0.06543-0.57380-0.56429
   3  -5   0   -0.49    2.05   1 0.07648-0.10185-0.44248-0.62590-0.89351-0.77321
   3   5   0   -0.34    1.79   1-0.60316-0.57163-0.04390 0.23671 0.79640 0.78561
   3   5   0   -0.12    1.78   1-0.53243-0.49760-0.04438 0.23602 0.84530 0.83467
  -3   5   0    3.54    2.14   1-0.78533-0.60472 0.61435 0.79517 0.07626-0.04472
   3  -5   1  143.42    4.42   1-0.56069-0.77291 0.72221 0.54269-0.40499-0.32877
  -3  -5  -1  146.99    4.72   1-0.80836-0.80908 0.04278-0.24085-0.58712-0.53606
   3  -5   1  138.35    4.39   1 0.17358-0.03698-0.37088-0.55142-0.91231-0.83340
   3   5   1  130.50    4.16   1-0.56625-0.56699 0.00350 0.28704 0.82422 0.77209
   3   5   1  121.88    4.08   1-0.57556-0.57296 0.00816 0.29190 0.81771 0.76583
  -3   5  -1  137.26    4.42   1-0.75525-0.54235 0.65437 0.83195-0.03728-0.11701
   3  -5   2   58.20    2.96   1-0.45609-0.70009 0.82725 0.65078-0.32807-0.29386
  -3  -5  -2   60.20    3.58   1-0.80367-0.77240-0.11594-0.40279-0.58366-0.49106
   3  -5   2   65.81    3.69   1 0.26456 0.02177-0.29668-0.47434-0.91759-0.88007
   3   5   2   51.68    2.74   1-0.52129-0.55430 0.05739 0.34385 0.85144 0.75796
   3   5   2   55.42    3.42   1-0.59845-0.62808 0.03768 0.32475 0.80026 0.70713
  -3   5  -2   54.61    3.00   1-0.70434-0.45916 0.68877 0.86312-0.17173-0.21020
   3  -5   3    2.48    2.00   1-0.36294-0.63871 0.89492 0.72159-0.25957-0.26710
  -3  -5  -3    5.61    2.57   1-0.78344-0.72102-0.25038-0.54017-0.56879-0.43396
   3  -5   3    5.09    2.41   1 0.34731 0.07229-0.22258-0.39736-0.91095-0.91481
   3   5   3    2.48    1.80   1-0.46456-0.52986 0.12048 0.40986 0.87730 0.74246
   3   5   3    3.27    2.37   1-0.60999-0.67185 0.05303 0.34344 0.79062 0.65624
  -3   5  -3   -0.33    1.82   1-0.62595-0.34848 0.70970 0.88082-0.32327-0.32048
   3  -5   4    8.38    2.38   1-0.28229-0.58983 0.93819 0.76800-0.20027-0.24953
  -3  -5  -4   11.79    2.82   1-0.75553-0.66121-0.35855-0.65153-0.54827-0.37189
  -3  -5  -4    7.03    1.68   1 0.35931 0.45731-0.21126-0.50347-0.90898-0.73306
  -3   5  -4    6.08    2.26   1-0.42458-0.11681 0.16219 0.33327 0.89074 0.93556
   3   5   4   13.65    2.51   1-0.61448-0.70857 0.05911 0.35286 0.78671 0.61107
  -3   5  -4    7.03    1.80   1-0.51959-0.20983 0.70847 0.87636-0.47757-0.43353
   3  -5   5    3.35    2.49   1-0.21250-0.55182 0.96573 0.79869-0.14895-0.23995
  -3  -5  -5   -1.66    2.14   1-0.72617-0.59994-0.44190-0.73807-0.52667-0.30873
  -3  -5  -5    1.09    1.65   1 0.25071 0.38088-0.30845-0.60368-0.91760-0.70034
  -3   5  -5   -0.74    2.67   1-0.48883-0.14879 0.09409 0.26225 0.86728 0.95345
   3   5   5    2.28    2.30   1-0.61423-0.74054 0.05877 0.35585 0.78693 0.57005
   3  -5   6   14.12    2.43   1-0.15158-0.52260 0.98294 0.81896-0.10415-0.23701
  -3  -5  -6   14.69    2.91   1-0.69901-0.54087-0.50459-0.80395-0.50671-0.24721
  -3  -5  -6   10.92    1.85   1 0.11529 0.27768-0.41477-0.71289-0.90259-0.64395
  -3   5  -6   16.01    2.85   1-0.54484-0.17252 0.02963 0.19487 0.83801 0.96553
   3  -5   6   12.61    1.96   1 0.28730-0.08729-0.65558-0.81540 0.69833 0.57226
   3   5   6   13.26    2.95   1-0.61054-0.76909 0.05378 0.35419 0.79015 0.53201
   3  -5   7    5.62    2.23   1-0.09737-0.50015 0.99316 0.83233-0.06429-0.23889
  -3  -5  -7    2.05    2.29   1-0.67578-0.48573-0.55098-0.85352-0.48962-0.18856
  -3   5  -7    5.99    2.65   1-0.59337-0.18877-0.03101 0.13130 0.80432 0.97320
   3  -5   7    5.84    1.90   1 0.18658-0.22030-0.61103-0.76744 0.76930 0.60206
   3   5   7    1.83    2.54   1-0.60421-0.79498 0.04529 0.34904 0.79553 0.49615
   3  -5   8   40.68    3.31   1-0.04848-0.48302 0.99842 0.84072-0.02834-0.24468
  -3  -5  -8   28.34    3.43   1-0.65699-0.43503-0.58478-0.89050-0.47580-0.13319
  -3   5  -8   30.20    3.27   1-0.63523-0.19836-0.08793 0.07146 0.76729 0.97751
   3  -5   8   28.88    2.36   1 0.10792-0.33124-0.57025-0.72326 0.81435 0.60594
   3   5   8   33.67    3.30   1-0.59572-0.81872 0.03408 0.34117 0.80246 0.46183
   3  -5   9   43.09    3.80   1-0.00377-0.47007 0.99998 0.84542 0.00453-0.25355
  -3  -5  -9   37.67    3.16   1-0.64253-0.38867-0.60889-0.91780-0.46517-0.08100
  -3   5  -9   39.68    3.47   1-0.67118-0.20204-0.14133 0.01514 0.72768 0.97925
   3   5   9   36.61    3.46   1-0.58540-0.84063 0.02070 0.33111 0.81047 0.42859
   3  -5  10   15.51    4.08   1 0.03761-0.46044 0.99868 0.84725 0.03497-0.26485
  -3  -5 -10    5.90    2.55   1-0.63204-0.34626-0.62549-0.93759-0.45746-0.03172
  -3   5 -10    8.39    4.17   1-0.70191-0.20049-0.19147-0.03791 0.68603 0.97895
   3   5  10    7.09    3.67   1-0.57346-0.86092 0.00551 0.31926 0.81921 0.39607
   3  -5  11   10.55    3.43   1 0.07635-0.45346 0.99505 0.84677 0.06346-0.27811
  -3  -5 -11   12.86    3.44   1-0.62503-0.30735-0.63619-0.95147-0.45231 0.01498
  -3   5 -11    7.15    3.62   1-0.72799-0.19429-0.23862-0.08798 0.64271 0.97698
   3   5  11   12.28    2.63   1-0.56003-0.87972-0.01118 0.30590 0.82839 0.36400
   3  -5  12    4.86    2.49   1 0.11294-0.44863 0.98948 0.84433 0.09036-0.29295
  -3  -5 -12    0.32    4.38   1-0.62105-0.27146-0.64213-0.96060-0.44938 0.05946
  -3   5 -12    2.04    3.46   1-0.74988-0.18391-0.28305-0.13532 0.59796 0.97358
   3   5  12   -1.01    3.85   1-0.54522-0.89714-0.02918 0.29123 0.83778 0.33215
   3  -5  13   27.10    4.93   1 0.14811-0.44599 0.98211 0.84075 0.11623-0.30695
  -3  -5 -13   13.68    5.00   1-0.61966-0.23817-0.64419-0.96584-0.44836 0.10204
  -3   5 -13   10.59    3.33   1-0.76796-0.16972-0.32500-0.18019 0.55190 0.96887
   3   5  13   18.69    3.93   1-0.52906-0.91321-0.04834 0.27541 0.84720 0.30031
   3  -5  14   -2.13    3.05   1 0.18145-0.44450 0.97327 0.83510 0.14074-0.32404
  -3  -5 -14    0.17    4.68   1-0.62049-0.20708-0.64297-0.96781-0.44896 0.14299
  -3   5 -14    2.54    3.90   1-0.78254-0.15202-0.36467-0.22278 0.50462 0.96293
   3   5  14    1.66    4.74   1-0.51159-0.92797-0.06853 0.25855 0.85648 0.26835
   3  -5  15   15.28    3.22   1 0.21356-0.44425 0.96300 0.82803 0.16435-0.34204
  -3  -5 -15   11.51    3.87   1-0.62320-0.17789-0.63893-0.96696-0.45096 0.18256
  -3   5 -15    3.70    4.15   1-0.79382-0.13102-0.40226-0.26329 0.45610 0.95577
   3   5  15    1.98    4.24   1-0.49282-0.94143-0.08967 0.24074 0.86549 0.23611
   3  -5  16   -3.78    3.96   1 0.24463-0.44504 0.95137 0.81960 0.18720-0.36080
  -3  -5 -16    1.36    4.27   1-0.62753-0.15030-0.63242-0.96363-0.45414 0.22093
   3   5  16   -4.18    3.49   1-0.47334-0.95320-0.11103 0.22340 0.87384 0.20369
  -3  -7  16   -0.59    5.22   1 0.09266-0.49004 0.99283 0.66982 0.07545-0.55784
   3   7 -16   -4.39    5.52   1-0.80799-0.21802-0.48192-0.15533 0.33896 0.96350
  -3   7  16    6.68    4.26   1-0.62464-0.91628 0.07307 0.39944 0.77748-0.02940
  -3  -7  15    5.07    4.01   1 0.05091-0.50002 0.99769 0.67155 0.04475-0.54679
   3  -7 -15   -4.74    3.10   1-0.68133-0.42638-0.54039-0.86193-0.49371 0.27435
   3   7 -15    9.67    4.33   1-0.80523-0.24754-0.45751-0.12800 0.37719 0.96038
  -3   7  15    1.75    4.05   1-0.64543-0.90484 0.10261 0.42565 0.75688-0.00874
  -3  -7  14    1.25    3.41   1 0.00743-0.51174 0.99989 0.67060 0.01278-0.53702
   3  -7 -14    0.11    3.29   1-0.68194-0.45890-0.53922-0.85756-0.49415 0.23234
   3   7 -14   -3.80    3.63   1-0.80087-0.27545-0.43241-0.09998 0.41425 0.95609
  -3   7  14    2.35    3.60   1-0.66501-0.89219 0.13181 0.45152 0.73510 0.01071
  -3  -7  13    2.08    3.11   1-0.03799-0.52542 0.99906 0.66664-0.02062-0.52869
   3  -7 -13    5.84    3.42   1-0.68471-0.49358-0.53380-0.84897-0.49619 0.18875
   3   7 -13    7.55    3.20   1-0.79495-0.30181-0.40663-0.07128 0.45020 0.95069
  -3   7  13    6.31    2.79   1-0.68320-0.87877 0.16037 0.47634 0.71239 0.02898
  -3  -7  12    2.42    3.59   1-0.08561-0.54128 0.99477 0.65921-0.05564-0.52196
   3   7 -12   -1.85    3.82   1-0.78750-0.32663-0.38017-0.04190 0.48508 0.94422
  -3   7  12    0.72    3.79   1-0.70049-0.86380 0.18903 0.50171 0.68817 0.04602
  -3  -7  11    1.38    2.77   1-0.13566-0.55957 0.98643 0.64773-0.09245-0.51702
   3  -7 -11    4.86    2.56   1-0.69798-0.57067-0.50677-0.81556-0.50595 0.09587
   3  -7 -11    4.99    2.46   1-0.34808-0.21347-0.66728-0.97528-0.65846-0.05702
   3   7 -11    7.71    3.76   1-0.77853-0.34993-0.35302-0.01183 0.51890 0.93669
  -3   7  11    6.54    3.50   1-0.71663-0.84770 0.21746 0.52686 0.66267 0.06178
  -3  -7  10    6.01    3.15   1-0.18824-0.58059 0.97333 0.63156-0.13111-0.51384
   3  -7 -10    5.92    2.79   1-0.70906-0.61365-0.48261-0.78822-0.51410 0.04616
   3  -7 -10    7.81    2.92   1-0.33212-0.22978-0.66167-0.96675-0.67222-0.11213
   3   7 -10    8.25    2.79   1-0.76803-0.37171-0.32517 0.01893 0.55171 0.92815
  -3   7  10    5.81    2.74   1-0.73166-0.83046 0.24571 0.55182 0.63584 0.07621
  -3  -7   9    3.07    2.74   1-0.24382-0.60440 0.95444 0.60953-0.17198-0.51298
   3  -7  -9    2.78    2.22   1-0.72334-0.65984-0.44896-0.75138-0.52459-0.00588
   3  -7  -9    4.44    2.39   1-0.30962-0.23955-0.65333-0.95550-0.69086-0.17212
   3   7  -9    3.43    4.07   1-0.75600-0.39196-0.29660 0.05042 0.58350 0.91859
  -3   7   9    3.06    3.69   1-0.74555-0.81210 0.27382 0.57664 0.60759 0.08922
  -3  -7   8    5.80    2.99   1-0.30240-0.63121 0.92860 0.58055-0.21506-0.51432
   3  -7  -8    4.96    2.51   1-0.74067-0.70907-0.40332-0.70256-0.53733-0.06018
   3  -7  -8    8.54    2.32   1-0.28010-0.24230-0.64164-0.94090-0.71403-0.23663
   3   7  -8    7.73    2.59   1-0.74242-0.41065-0.26729 0.08265 0.61429 0.90803
  -3   7   8    6.58    2.63   1-0.75830-0.79259 0.30182 0.60136 0.57782 0.10071
  -3  -7   7    4.26    2.28   1-0.36392-0.66096 0.89431 0.54312-0.26030-0.51782
   3  -7  -7    0.69    2.35   1-0.76034-0.76065-0.34262-0.63867-0.55180-0.11620
   3  -7  -7    4.51    2.36   1-0.24318-0.23765-0.62588-0.92222-0.74103-0.30498
   3   7  -7    2.54    3.13   1-0.72725-0.42775-0.23721 0.11564 0.64407 0.89646
  -3   7   7    2.04    3.31   1-0.76986-0.77190 0.32979 0.62605 0.54639 0.11053
  -3  -7   6    1.28    3.11   1-0.42804-0.69331 0.84985 0.49551-0.30745-0.52323
   3  -7  -6   -0.29    2.67   1-0.78066-0.81288-0.26337-0.55623-0.56674-0.17271
   3  -7  -6   -2.44    2.50   1-0.19774-0.22458-0.60483-0.89862-0.77140-0.37687
   3   7  -6   -0.07    2.32   1-0.71044-0.44321-0.20634 0.14944 0.67282 0.88386
  -3   7   6    4.23    2.43   1-0.78019-0.74998 0.35778 0.65074 0.51311 0.11851
  -3  -7   5    4.58    2.41   1-0.49342-0.72745 0.79381 0.43659-0.35552-0.52933
   3  -7  -5    2.58    2.29   1-0.79841-0.86254-0.16236-0.45204-0.57980-0.22732
   3  -7  -5    5.30    2.12   1-0.14593-0.20501-0.57871-0.86958-0.80236-0.44920
   3   7  -5    3.26    3.12   1-0.69192-0.45697-0.17462 0.18407 0.70052 0.87022
  -3   7   5    8.82    2.80   1-0.78921-0.72675 0.38585 0.67553 0.47775 0.12441
  -3  -7   4    1.29    1.99   1-0.55972-0.76191 0.72337 0.36295-0.40428-0.53641
   3  -7  -4   -0.48    1.91   1-0.80845-0.90336-0.04006-0.32770-0.58718-0.27667
   3  -7  -4   -0.04    2.24   1-0.08753-0.17885-0.54667-0.83463-0.83275-0.52096
   3   7  -4    1.80    2.81   1-0.67163-0.46895-0.14203 0.21959 0.72714 0.85548
  -3   7   4   -3.94    3.19   1-0.79681-0.70209 0.41410 0.70049 0.44000 0.12792
  -3  -7   3   47.28    3.31   1-0.62405-0.79439 0.63767 0.27407-0.45158-0.54204
   3  -7  -3   45.12    3.09   1-0.80473-0.93162 0.10402-0.18041-0.58445-0.31547
   3  -7  -3   40.12    2.90   1-0.02377-0.14733-0.50864-0.79367-0.86065-0.59022
   3   7  -3   43.85    3.74   1-0.64946-0.47906-0.10849 0.25604 0.75261 0.83960
   3   7  -3   32.50    2.48   1-0.22521-0.04985-0.34359 0.01847 0.91171 0.99858
  -3   7   3   39.67    3.59   1-0.80286-0.67610 0.44285 0.72561 0.39910 0.12790
  -3  -7   2    5.14    2.13   1-0.68299-0.82189 0.53717 0.17053-0.49493-0.54351
   3  -7  -2    6.97    2.34   1-0.78110-0.94014 0.26134-0.02027-0.56707-0.34018
   3  -7  -2    1.12    2.12   1 0.04368-0.11211-0.46498-0.74709-0.88424-0.65518
   3   7  -2    8.64    2.13   1-0.62530-0.48717-0.07398 0.29348 0.77686 0.82251
   3   7  -2    6.23    1.67   1-0.42921-0.28639-0.15747 0.20809 0.88937 0.93524
  -3   7   2    3.65    2.73   1-0.80703-0.64798 0.47176 0.75128 0.35516 0.12522
   3  -7  -1  135.36    4.66   1-0.73613-0.92708 0.41586 0.13746-0.53400-0.34872
  -3  -7   1  133.20    5.05   1-0.73359-0.84057 0.42268 0.05281-0.53213-0.53911
   3  -7  -1  134.50    4.66   1 0.11267-0.07530-0.41667-0.69583-0.90204-0.71424
   3   7  -1  136.00    4.75   1-0.59902-0.49317-0.03842 0.33195 0.79981 0.80410
   3   7  -1  118.98    4.19   1-0.52334-0.41314-0.05501 0.31430 0.85034 0.85470
  -3   7   1  123.07    4.82   1-0.80900-0.61767 0.50116 0.77746 0.30714 0.11845
   3  -7   0   49.86    3.26   1-0.67298-0.89588 0.55620 0.28085-0.48756-0.34426
  -3  -7   0   42.77    2.80   1-0.77224-0.84730 0.29902-0.07406-0.56055-0.52591
   3  -7   0   50.00    3.42   1 0.18195-0.03825-0.36436-0.64063-0.91330-0.76689
   3   7   0   47.91    3.20   1-0.57047-0.49690-0.00177 0.37152 0.82130 0.78425
   3   7   0   44.35    3.16   1-0.57279-0.49482 0.00467 0.37732 0.81968 0.78280
  -3   7   0   43.99    3.71   1-0.80826-0.58464 0.53118 0.80425 0.25405 0.10662
   3  -7   1  123.36    4.66   1-0.59914-0.85389 0.67327 0.40110-0.43327-0.33163
  -3  -7  -1  121.99    4.61   1-0.79707-0.84039 0.17216-0.20401-0.57881-0.50211
   3  -7   1  127.97    4.78   1 0.24949-0.00293-0.30948-0.58287-0.91759-0.81255
   3   7   1  119.00    4.49   1-0.53952-0.49822 0.03599 0.41220 0.84119 0.76279
   3   7   1  138.54    4.89   1-0.60032-0.55457 0.04013 0.41611 0.79874 0.72061
  -3   7  -1  123.25    4.86   1-0.80399-0.54808 0.56190 0.83174 0.19455 0.08838
   3  -7   2   47.47    3.35   1-0.52161-0.80820 0.76573 0.49675-0.37625-0.31629
  -3  -7  -2   52.84    3.61   1-0.80811-0.81944 0.04948-0.32990-0.58693-0.46869
   3  -7   2   51.08    3.84   1 0.31400 0.02935-0.25322-0.52372-0.91502-0.85137
   3   7   2   37.07    2.74   1-0.50602-0.49700 0.07486 0.45400 0.85926 0.73950
   3   7   2   47.70    3.09   1-0.61554-0.60203 0.06055 0.43987 0.78577 0.66638
  -3   7  -2   46.68    3.13   1-0.79493-0.50673 0.59326 0.85986 0.12692 0.06201
   3  -7   3   23.06    2.71   1-0.44570-0.76399 0.83586 0.56987-0.32043-0.30257
  -3  -7  -3   23.26    2.75   1-0.80748-0.78682-0.06331-0.44591-0.58647-0.42668
   3  -7   3   22.32    3.46   1 0.37412 0.05726-0.19707-0.46453-0.90619-0.88370
   3   7   3   25.85    2.58   1-0.46989-0.49314 0.11477 0.49682 0.87523 0.71412
   3   7   3   24.87    2.64   1-0.62314-0.64186 0.07099 0.45364 0.77887 0.61824
  -3   7  -3   18.14    2.02   1-0.77919-0.45870 0.62485 0.88822 0.04906 0.02540
   3  -7   4   13.93    2.70   1-0.37396-0.72402 0.88797 0.62512-0.26768-0.29155
  -3  -7  -4   10.98    3.01   1-0.79848-0.74698-0.16184-0.54715-0.57985-0.37766
   3   7   4   11.57    2.03   1-0.43114-0.48666 0.15549 0.54046 0.88878 0.68632
  -3   7  -4   12.67    2.19   1-0.43564-0.08583 0.15087 0.41462 0.88738 0.90593
   3   7   4    9.99    2.10   1-0.62563-0.67657 0.07444 0.46043 0.77655 0.57467
  -3   7  -4    4.13    1.70   1-0.75406-0.40128 0.65551 0.91565-0.04100-0.02339
   3  -7   5    9.33    2.44   1-0.30742-0.68925 0.92608 0.66638-0.21875-0.28436
  -3  -7  -5    9.49    2.71   1-0.78434-0.70094-0.24600-0.63450-0.56945-0.32571
  -3  -7  -5    9.93    2.12   1 0.36420 0.45258-0.20660-0.59448-0.90811-0.66464
  -3   7  -5    1.72    2.82   1-0.48671-0.10462 0.09643 0.35727 0.86822 0.92812
   3   7   5   12.26    2.45   1-0.62444-0.70762 0.07279 0.46211 0.77766 0.53453
  -3   7  -5    6.20    1.79   1-0.71629-0.33122 0.68281 0.93971-0.14383-0.08496
  -3  -7  -6   81.60    4.93   1 0.31653 0.43706-0.25094-0.64191-0.91478-0.63002
  -3   7  -6   99.18    4.92   1-0.53327-0.11891 0.04340 0.30131 0.84483 0.94608
   3  -7   7    8.83    2.69   1-0.18962-0.63500 0.97292 0.71950-0.13213-0.28121
  -3  -7  -7    3.44    2.94   1-0.75148-0.60426-0.37139-0.76626-0.54529-0.21842
  -3   7  -7    1.73    3.22   1-0.57542-0.12878-0.00798 0.24700 0.81781 0.96041
   3   7   7    5.55    2.86   1-0.61421-0.76184 0.05874 0.45473 0.78694 0.46131
   3  -7   8   19.96    2.61   1-0.13750-0.61455 0.98604 0.73568-0.09380-0.28477
  -3  -7  -8   20.02    2.98   1-0.73618-0.55705-0.41573-0.81379-0.53403-0.16561
  -3   7  -8   21.06    3.80   1-0.61336-0.13445-0.05759 0.19448 0.78769 0.97164
   3   7   8   16.12    2.48   1-0.60607-0.78593 0.04778 0.44710 0.79396 0.42708
   3  -7   9   -1.85    3.94   1-0.08891-0.59771 0.99434 0.74711-0.05806-0.29078
  -3  -7  -9    1.49    3.29   1-0.72282-0.51179-0.45023-0.85148-0.52421-0.11423
  -3   7  -9    2.54    3.69   1-0.64732-0.13613-0.10536 0.14379 0.75489 0.98019
   3   7   9   -2.72    2.29   1-0.59628-0.80837 0.03482 0.43748 0.80201 0.39388
   3  -7  10   31.33    4.20   1-0.04342-0.58398 0.99875 0.75466-0.02461-0.29907
  -3  -7 -10   34.47    3.99   1-0.71175-0.46881-0.47650-0.88093-0.51608-0.06454
  -3   7 -10   30.76    4.44   1-0.67753-0.13407-0.15129 0.09494 0.71976 0.98641
   3   7  10   33.52    4.89   1-0.58500-0.82932 0.02018 0.42617 0.81078 0.36139
   3  -7  11    1.20    3.46   1-0.00057-0.57289 0.99997 0.75902 0.00689-0.30931
  -3  -7 -11    0.67    2.68   1-0.70305-0.42820-0.49591-0.90352-0.50968-0.01658
  -3   7 -11   -0.28    2.77   1-0.70421-0.12848-0.19543 0.04788 0.68255 0.99055
   3   7  11   -1.71    4.06   1-0.57233-0.84887 0.00409 0.41341 0.82001 0.32937
   3  -7  12    7.04    4.37   1 0.04002-0.56405 0.99852 0.76070 0.03674-0.32120
  -3  -7 -12    4.30    3.25   1-0.69665-0.38989-0.50957-0.92038-0.50497 0.02968
  -3   7 -12    6.14    4.22   1-0.72758-0.11957-0.23784 0.00255 0.64347 0.99282
   3   7  12    7.38    3.07   1-0.55834-0.86712-0.01325 0.39940 0.82950 0.29761
   3  -7  13    2.28    4.12   1 0.07871-0.55712 0.99476 0.76008 0.06519-0.33449
  -3  -7 -13    5.30    4.46   1-0.69239-0.35372-0.51839-0.93238-0.50184 0.07437
  -3   7 -13   -1.88    2.91   1-0.74779-0.10751-0.27857-0.04109 0.60265 0.99335
   3   7  13    6.35    5.18   1-0.54309-0.88409-0.03173 0.38425 0.83907 0.26593
   3  -7  14    0.76    3.07   1 0.11577-0.55183 0.98896 0.75742 0.09244-0.34899
  -3  -7 -14   11.98    4.06   1-0.69010-0.31952-0.52307-0.94025-0.50015 0.11762
  -3   7 -14    1.72    4.79   1-0.76501-0.09245-0.31771-0.08314 0.56019 0.99223
   3   7  14    0.87    4.35   1-0.52658-0.89981-0.05124 0.36808 0.84857 0.23419
   3  -7  15    0.01    4.39   1 0.15168-0.54849 0.98125 0.75361 0.11885-0.36225
  -3  -7 -15    0.73    3.75   1-0.68956-0.28707-0.52416-0.94452-0.49975 0.15957
  -3   7 -15    2.18    3.74   1-0.77933-0.07450-0.35531-0.12367 0.51612 0.98952
   3   7  15   -3.04    4.48   1-0.50882-0.91428-0.07169 0.35096 0.85788 0.20224
  -3  -9  15    0.57    3.80   1 0.00112-0.59232 0.99996 0.58115 0.00813-0.55804
   3   9 -15    7.39    5.95   1-0.79961-0.19987-0.42635-0.00416 0.42289 0.97981
  -3   9  15   -1.81    3.30   1-0.64179-0.85805 0.09733 0.51260 0.76067-0.03121
  -3  -9  14   12.03    4.58   1-0.04325-0.60494 0.99876 0.57681-0.02449-0.54893
   3  -9 -14    1.21    3.60   1-0.74664-0.56642-0.38607-0.79675-0.54173 0.21058
   3   9 -14   -1.63    4.09   1-0.79339-0.22593-0.40065 0.02445 0.45826 0.97383
  -3   9  14    4.42    3.22   1-0.66002-0.84405 0.12422 0.53616 0.74090-0.00973
  -3  -9  13    1.25    4.66   1-0.08920-0.61913 0.99430 0.56921-0.05828-0.54098
   3  -9 -13   -1.33    3.67   1-0.75092-0.60262-0.37310-0.78059-0.54488 0.16587
   3   9 -13   -4.49    4.28   1-0.78571-0.25052-0.37442 0.05360 0.49240 0.96662
  -3   9  13   -1.03    3.35   1-0.67689-0.82940 0.15028 0.55854 0.72057 0.01086
  -3  -9  12    4.85    2.88   1-0.13684-0.63501 0.98618 0.55796-0.09331-0.53426
   3  -9 -12    2.62    3.81   1-0.75685-0.64045-0.35426-0.75856-0.54924 0.11995
   3   9 -12    0.62    4.63   1-0.77661-0.27370-0.34768 0.08325 0.52533 0.95820
  -3   9  12   -1.31    4.33   1-0.69290-0.81316 0.17625 0.58122 0.69915 0.03069
  -3  -9  11   -0.99    4.40   1-0.18609-0.65273 0.97395 0.54267-0.12953-0.52862
   3  -9 -11    4.20    3.26   1-0.76437-0.67988-0.32857-0.72968-0.55477 0.07286
   3   9 -11   -2.80    4.80   1-0.76614-0.29550-0.32047 0.11339 0.55706 0.94858
  -3   9  11   -1.07    4.75   1-0.70784-0.79585 0.20176 0.60344 0.67694 0.04974
  -3  -9  10    9.03    3.68   1-0.23731-0.67218 0.95693 0.52251-0.16719-0.52454
   3  -9 -10   12.32    3.78   1-0.77328-0.72070-0.29486-0.69280-0.56132 0.02475
   3  -9 -10    6.56    2.57   1-0.13679-0.07655-0.57388-0.97219-0.80743-0.22132
   3   9 -10    8.56    3.33   1-0.75430-0.31594-0.29278 0.14399 0.58761 0.93778
  -3   9  10   20.89    4.30   1-0.72172-0.77748 0.22682 0.62521 0.65395 0.06801
  -3  -9   9    0.95    4.44   1-0.29032-0.69342 0.93445 0.49688-0.20618-0.52179
   3  -9  -9    0.56    2.23   1-0.78314-0.76246-0.25183-0.64657-0.56857-0.02405
   3  -9  -9    1.82    2.76   1-0.11545-0.08745-0.56233-0.95772-0.81881-0.27407
   3   9  -9    5.79    3.24   1-0.74114-0.33505-0.26466 0.17504 0.61697 0.92579
  -3   9   9   -3.66    3.51   1-0.73457-0.75807 0.25142 0.64653 0.63022 0.08554
  -3  -9   8   15.25    3.81   1-0.34500-0.71632 0.90568 0.46497-0.24638-0.52025
   3  -9  -8   28.61    3.39   1-0.79314-0.80438-0.19805-0.58961-0.57592-0.07296
   3  -9  -8   15.42    3.36   1-0.08868-0.09292-0.54733-0.93980-0.83220-0.32883
   3   9  -8   18.72    4.17   1-0.72667-0.35286-0.23611 0.20650 0.64513 0.91260
  -3   9   8   21.58    3.72   1-0.74638-0.73763 0.27557 0.66740 0.60577 0.10235
  -3  -9   7    6.37    2.72   1-0.40104-0.74060 0.86974 0.42588-0.28759-0.51973
   3  -9  -7    1.86    2.16   1-0.80203-0.84517-0.13222-0.52059-0.58246-0.12106
   3  -9  -7   10.01    2.99   1-0.05669-0.09317-0.52867-0.91822-0.84693-0.38493
   3   9  -7    4.51    2.92   1-0.71091-0.36937-0.20718 0.23836 0.67207 0.89819
  -3   9   7    5.09    3.28   1-0.75717-0.71616 0.29926 0.68779 0.58062 0.11846
  -3  -9   6   47.04    3.34   1-0.45795-0.76574 0.82567 0.37868-0.32944-0.51984
   3  -9  -6   41.99    3.18   1-0.80788-0.88139-0.05506-0.44166-0.58676-0.16752
   3  -9  -6   42.86    3.51   1-0.01987-0.08859-0.50621-0.89284-0.86218-0.44155
   3   9  -6   51.43    4.35   1-0.69389-0.38462-0.17789 0.27056 0.69775 0.88252
  -3   9   6   45.08    3.29   1-0.76695-0.69368 0.32247 0.70772 0.55479 0.13389
  -3  -9   5   47.27    3.71   1-0.51447-0.79103 0.77309 0.32322-0.37100-0.51940
   3  -9  -5   39.68    3.24   1-0.80857-0.91408 0.03621-0.34717-0.58727-0.20957
   3  -9  -5   47.39    3.38   1 0.02124-0.07971-0.47989-0.86361-0.87707-0.49781
   3   9  -5   47.16    3.34   1-0.67564-0.39865-0.14831 0.30306 0.72215 0.86557
  -3   9   5   42.11    3.24   1-0.77570-0.67018 0.34518 0.72714 0.52832 0.14868
  -3  -9   4   27.58    3.71   1-0.57045-0.81517 0.71042 0.25736-0.41217-0.51889
   3  -9  -4   17.20    2.82   1-0.80130-0.93879 0.13882-0.24135-0.58192-0.24576
   3  -9  -4   21.31    2.80   1 0.06549-0.06766-0.45010-0.83077-0.89056-0.55248
   3   9  -4   20.59    3.83   1-0.65620-0.41148-0.11848 0.33581 0.74522 0.84729
  -3   9   4   22.96    2.88   1-0.78343-0.64566 0.36737 0.74605 0.50126 0.16288
  -3  -9   3   22.02    2.94   1-0.62390-0.83677 0.63789 0.18165-0.45147-0.51653
   3  -9  -3   19.80    2.88   1-0.78341-0.95308 0.25053-0.12692-0.56876-0.27479
   3  -9  -3   24.19    2.79   1 0.11305-0.05233-0.41640-0.79417-0.90212-0.60542
   3   9  -3   19.18    3.05   1-0.63563-0.42319-0.08850 0.36871 0.76690 0.82762
   3   9  -3   14.80    2.08   1-0.34464-0.12639-0.23980 0.21450 0.90758 0.96850
  -3   9   3   22.34    2.66   1-0.79013-0.62011 0.38900 0.76439 0.47366 0.17654
  -3  -9   2   19.16    2.91   1-0.67309-0.85412 0.55600 0.09657-0.48764-0.51102
   3  -9  -2    9.84    3.08   1-0.75392-0.95552 0.36371-0.01051-0.54708-0.29472
   3  -9  -2   16.42    2.60   1 0.16246-0.03515-0.37947-0.75436-0.91082-0.65551
   3   9  -2   13.85    3.26   1-0.61401-0.43384-0.05847 0.40166 0.78712 0.80650
   3   9  -2   12.49    2.11   1-0.47149-0.28543-0.11304 0.34465 0.87459 0.89428
  -3   9   2   11.29    2.24   1-0.79581-0.59353 0.41002 0.78212 0.44560 0.18973
  -3  -9   1  101.75    4.85   1-0.71604-0.86559 0.46655 0.00406-0.51923-0.50073
   3  -9  -1  100.53    5.04   1-0.71288-0.94640 0.47391 0.10290-0.51690-0.30615
   3  -9  -1  102.94    4.73   1 0.21280-0.01703-0.33978-0.71179-0.91611-0.70218
   3   9  -1  109.43    4.93   1-0.59145-0.44356-0.02851 0.43453 0.80583 0.78385
   3   9  -1   98.80    4.53   1-0.53767-0.38433-0.03818 0.42336 0.84228 0.82039
  -3   9   1  103.11    4.50   1-0.80045-0.56592 0.43036 0.79917 0.41719 0.20259
   3  -9   0   45.07    4.11   1-0.66200-0.92743 0.57604 0.20804-0.47949-0.31077
  -3  -9   0   36.26    3.59   1-0.75160-0.86922 0.37102-0.09468-0.54537-0.48526
   3  -9   0   37.71    3.04   1 0.26318 0.00111-0.29786-0.66698-0.91761-0.74506
   3   9   0   29.05    2.89   1-0.56812-0.45251 0.00116 0.46714 0.82294 0.75961
   3   9   0   32.24    2.77   1-0.57586-0.45475 0.00855 0.47343 0.81749 0.75436
  -3   9   0   30.34    3.17   1-0.80413-0.53749 0.45029 0.81560 0.38807 0.21421
   3  -9   1  168.22    6.39   1-0.60446-0.90173 0.66595 0.30114-0.43718-0.31013
  -3  -9  -1  172.57    6.45   1-0.77849-0.86420 0.27301-0.19591-0.56515-0.46343
   3  -9   1  181.27    7.10   1 0.31284 0.01855-0.25427-0.62051-0.91513-0.78397
   3   9   1  173.71    6.78   1-0.54424-0.46090 0.03035 0.49925 0.83837 0.73369
   3   9   1  174.18    6.47   1-0.59858-0.50969 0.03784 0.50606 0.80016 0.69577
   3  -9   2    0.91    2.63   1-0.54317-0.87229 0.74243 0.38080-0.39211-0.30674
  -3  -9  -2    1.14    3.04   1-0.79658-0.85050 0.17563-0.29630-0.57845-0.43456
   3  -9   2   -4.50    2.66   1 0.36059 0.03412-0.21004-0.57317-0.90876-0.81872
   3   9   2    2.10    2.65   1-0.52012-0.46905 0.05874 0.53055 0.85206 0.70604
   3   9   2    0.68    2.59   1-0.61184-0.55518 0.05553 0.52708 0.78902 0.64339
  -3   9  -2    0.82    2.74   1-0.80833-0.47711 0.48656 0.84540 0.33144 0.24009
   3  -9   3   17.73    2.65   1-0.48091-0.84172 0.80546 0.44682-0.34632-0.30307
  -3  -9  -3   16.35    3.12   1-0.80633-0.82826 0.08293-0.39221-0.58562-0.40019
   3   9   3   12.66    2.67   1-0.49618-0.47739 0.08592 0.56065 0.86395 0.67657
  -3   9  -3   18.55    3.04   1-0.41375-0.05417 0.17314 0.53248 0.89377 0.84470
   3   9   3   26.03    3.07   1-0.61883-0.59441 0.06505 0.53994 0.78281 0.59593
  -3   9  -3   17.70    2.19   1-0.80904-0.44553 0.50275 0.85837 0.30443 0.25434
   3  -9   4    7.82    3.03   1-0.41942-0.81200 0.85639 0.50089-0.30111-0.29959
  -3  -9  -4   15.78    3.05   1-0.80910-0.79904-0.00271-0.48107-0.58766-0.36068
   3   9   4    7.41    2.37   1-0.47303-0.48651 0.11137 0.58903 0.87397 0.64525
  -3   9  -4    6.85    2.34   1-0.45734-0.06549 0.12817 0.48460 0.88000 0.87228
   3   9   4   11.39    2.96   1-0.62141-0.62921 0.06860 0.54682 0.78047 0.55233
  -3   9  -4    3.61    1.82   1-0.80899-0.41319 0.51708 0.86947 0.27954 0.27071
   3  -9   5    8.75    2.75   1-0.35989-0.78424 0.89679 0.54443-0.25733-0.29756
  -3  -9  -5   13.81    2.89   1-0.80655-0.76450-0.07956-0.56113-0.58578-0.31727
  -3   9  -5   11.44    3.42   1-0.49855-0.07442 0.08328 0.43679 0.86285 0.89647
   3   9   5    5.50    1.96   1-0.45144-0.49720 0.13440 0.61497 0.88211 0.61203
   3   9   5    9.13    3.75   1-0.62068-0.66071 0.06759 0.54914 0.78114 0.51175
   3  -9   6   46.69    4.53   1-0.30293-0.75905 0.92833 0.57911-0.21545-0.29741
  -3  -9  -6   54.78    4.22   1-0.80046-0.72797-0.14609-0.63011-0.58130-0.27019
  -3   9  -6   54.64    3.99   1-0.53720-0.08080 0.03875 0.38934 0.84256 0.91754
   3   9   6   35.78    3.74   1-0.43254-0.51057 0.15406 0.63755 0.88835 0.57692
   3   9   6   53.25    3.85   1-0.61735-0.68961 0.06302 0.54791 0.78415 0.47351
   3  -9   7   -0.97    2.62   1-0.24875-0.73664 0.95251 0.60643-0.17561-0.29931
  -3  -9  -7    3.36    2.92   1-0.79221-0.68782-0.20371-0.69091-0.57524-0.22257
  -3   9  -7    2.22    3.90   1-0.57321-0.08453-0.00520 0.34246 0.81939 0.93571
   3   9   7    3.28    3.72   1-0.61189-0.71638 0.05560 0.54382 0.78898 0.43709
   3  -9   8   12.28    4.02   1-0.19733-0.71699 0.97060 0.62767-0.13779-0.30323
  -3  -9  -8    8.47    2.53   1-0.78308-0.64678-0.25209-0.74248-0.56852-0.17430
  -3   9  -8   10.72    3.10   1-0.60655-0.08560-0.04842 0.29632 0.79356 0.95124
   3   9   8   10.37    2.99   1-0.60460-0.74132 0.04582 0.53738 0.79520 0.40206
   3  -9   9    0.49    2.48   1-0.14864-0.69995 0.98361 0.64371-0.10199-0.30934
  -3  -9  -9    1.01    3.74   1-0.77399-0.60578-0.29200-0.78557-0.56184-0.12605
  -3   9  -9    1.07    3.96   1-0.63723-0.08401-0.09079 0.25103 0.76529 0.96432
   3   9   9    4.09    3.79   1-0.59571-0.76466 0.03407 0.52896 0.80247 0.36808
   3  -9  10    2.61    3.98   1-0.10222-0.68528 0.99244 0.65568-0.06785-0.31694
  -3  -9 -10    3.32    3.78   1-0.76556-0.56544-0.32429-0.82105-0.55564-0.07830
  -3   9 -10    3.42    3.65   1-0.66529-0.07979-0.13224 0.20667 0.73477 0.97515
   3   9  10    5.71    3.18   1-0.58535-0.78653 0.02064 0.51886 0.81051 0.33487
   3  -9  11    6.10    4.01   1-0.05796-0.67278 0.99769 0.66407-0.03530-0.32614
  -3  -9 -11   10.22    3.18   1-0.75819-0.52616-0.34985-0.84980-0.55022-0.03131
  -3   9 -11    7.67    3.65   1-0.69076-0.07299-0.17270 0.16328 0.70214 0.98387
   3   9  11    4.85    5.03   1-0.57364-0.80704 0.00574 0.50730 0.81908 0.30219
   3  -9  12   -4.91    4.42   1-0.01562-0.66220 0.99986 0.66938-0.00417-0.33675
  -3  -9 -12    4.37    3.36   1-0.75209-0.48815-0.36949-0.87263-0.54573 0.01472
  -3   9 -12    3.87    3.64   1-0.71370-0.06365-0.21216 0.12091 0.66754 0.99062
   3   9  12    3.62    2.95   1-0.56062-0.82625-0.01045 0.49443 0.82800 0.26986
   3  -9  13    0.44    4.39   1 0.02499-0.65334 0.99935 0.67200 0.02569-0.34862
  -3  -9 -13    0.49    3.45   1-0.74735-0.45151-0.38394-0.89025-0.54225 0.05976
  -3   9 -13    7.16    4.64   1-0.73414-0.05182-0.25058 0.07956 0.63105 0.99548
   3   9  13    4.63    3.28   1-0.54635-0.84421-0.02782 0.48041 0.83709 0.23770
   3  -9  14    2.82    4.21   1 0.06410-0.64600 0.99645 0.67224 0.05445-0.36161
  -3  -9 -14   10.99    4.27   1-0.74400-0.41625-0.39379-0.90330-0.53979 0.10378
  -3   9 -14    3.43    3.91   1-0.75214-0.03754-0.28798 0.03925 0.59274 0.99852
   3   9  14   -0.71    4.95   1-0.53085-0.86094-0.04624 0.46531 0.84620 0.20556
  -3 -11  13   -0.05    3.06   1-0.12413-0.69656 0.98870 0.47094-0.08397-0.54129
   3  11 -13   -2.57    3.75   1-0.77901-0.20178-0.35438 0.16632 0.51725 0.96520
  -3  11  13    0.71    4.13   1-0.66534-0.77401 0.13232 0.63317 0.73471-0.00093
  -3 -11  12    1.39    5.16   1-0.17064-0.71131 0.97822 0.45732-0.11817-0.53374
   3 -11 -12    3.80    3.66   1-0.79509-0.72152-0.18568-0.68232-0.57736 0.11764
   3  11 -12    0.44    4.77   1-0.76926-0.22431-0.32828 0.19534 0.54813 0.95473
  -3  11  12    4.21    4.46   1-0.68012-0.75732 0.15542 0.65267 0.71643 0.02167
  -3 -11  11    0.12    3.34   1-0.21815-0.72730 0.96383 0.43989-0.15310-0.52680
   3 -11 -11    8.08    3.73   1-0.79936-0.75770-0.15506-0.64851-0.58049 0.07294
   3  11 -11   -2.33    3.69   1-0.75833-0.24566-0.30192 0.22462 0.57772 0.94297
  -3  11  11    1.56    4.59   1-0.69410-0.73905 0.17824 0.67221 0.69746 0.04395
  -3 -11  10    0.22    4.18   1-0.26690-0.74429 0.94501 0.41793-0.18895-0.52091
   3 -11 -10   -1.21    3.32   1-0.80343-0.79158-0.11843-0.61043-0.58349 0.02756
   3  11 -10    1.52    2.96   1-0.74627-0.26587-0.27534 0.25411 0.60601 0.92991
  -3  11  10    2.64    4.06   1-0.70706-0.71976 0.20040 0.69108 0.67815 0.06591
  -3 -11   9    6.82    4.05   1-0.31663-0.76225 0.92134 0.39112-0.22552-0.51574
   3 -11  -9    4.44    3.14   1-0.80695-0.82709-0.07303-0.56181-0.58608-0.01656
   3 -11  -9    4.60    3.05   1 0.05120 0.03732-0.45989-0.94813-0.88649-0.31566
   3  11  -9   -4.12    5.65   1-0.73314-0.28501-0.24860 0.28377 0.63300 0.91555
  -3  11   9   -1.43    3.31   1-0.71904-0.69948 0.22186 0.70925 0.65859 0.08761
  -3 -11   8   -0.11    3.77   1-0.36711-0.78095 0.89232 0.35895-0.26264-0.51112
   3 -11  -8    1.06    2.88   1-0.80895-0.86108-0.01938-0.50495-0.58755-0.05958
   3 -11  -8    1.79    2.74   1 0.07033 0.02420-0.44676-0.93180-0.89188-0.36214
   3  11  -8    2.56    3.10   1-0.71899-0.30313-0.22176 0.31353 0.65869 0.89989
  -3  11   8   -2.30    3.04   1-0.73004-0.67823 0.24258 0.72668 0.63889 0.10916
  -3 -11   7   -1.20    4.85   1-0.41800-0.80008 0.85745 0.32094-0.30006-0.50681
   3 -11  -7    0.21    2.56   1-0.80837-0.89249 0.04268-0.43967-0.58712-0.10069
   3 -11  -7   -0.42    3.02   1 0.09418 0.01583-0.42998-0.91215-0.89790-0.40955
   3  11  -7    2.26    3.41   1-0.70389-0.32031-0.19487 0.34334 0.68305 0.88290
  -3  11   7    1.96    3.89   1-0.74009-0.65603 0.26251 0.74333 0.61914 0.13067
  -3 -11   6    3.11    3.41   1-0.46884-0.81915 0.81627 0.27662-0.33745-0.50246
   3 -11  -6    4.16    2.32   1-0.80395-0.92006 0.11287-0.36627-0.58387-0.13899
   3 -11  -6    0.27    2.41   1 0.12157 0.01099-0.41017-0.88945-0.90386-0.45689
   3  11  -6    3.28    3.59   1-0.68791-0.33661-0.16802 0.37311 0.70607 0.86456
  -3  11   6    1.56    3.03   1-0.74920-0.63288 0.28158 0.75912 0.59950 0.15229
  -3 -11   5   -0.26    2.46   1-0.51859-0.83769 0.76886 0.22635-0.37403-0.49703
   3 -11  -5    3.33    3.10   1-0.79438-0.94249 0.19025-0.28567-0.57684-0.17349
   3 -11  -5   -0.33    3.27   1 0.15201 0.00921-0.38744-0.86383-0.90927-0.50368
   3  11  -5    2.18    3.92   1-0.67116-0.35213-0.14130 0.40274 0.72771 0.84486
  -3  11   5    0.55    3.16   1-0.75737-0.60880 0.29971 0.77396 0.58012 0.17417
  -3 -11   4    2.59    2.82   1-0.56734-0.85458 0.71422 0.16852-0.40988-0.49120
   3 -11  -4    3.11    3.07   1-0.77821-0.95854 0.27423-0.19906-0.56495-0.20389
   3 -11  -4    1.22    2.27   1 0.18500 0.00997-0.36196-0.83547-0.91364-0.54944
   3  11  -4    1.11    4.11   1-0.65374-0.36698-0.11482 0.43214 0.74795 0.82375
  -3  11   4    2.15    3.93   1-0.76463-0.58380 0.31678 0.78774 0.56123 0.19654
  -3 -11   3   23.82    4.13   1-0.61368-0.86908 0.65291 0.10402-0.44395-0.48360
   3 -11  -3   31.42    3.93   1-0.75507-0.96731 0.36005-0.11001-0.54793-0.22848
   3 -11  -3   24.99    3.74   1 0.22000 0.01274-0.33392-0.80455-0.91656-0.59374
   3  11  -3   25.07    3.52   1-0.63577-0.38130-0.08871 0.46117 0.76675 0.80120
  -3  11   3   29.40    3.70   1-0.77097-0.55789 0.33264 0.80031 0.54309 0.21966
  -3 -11   2   15.87    3.53   1-0.65660-0.88016 0.58544 0.03336-0.47552-0.47349
   3 -11  -2   18.10    2.65   1-0.72448-0.96864 0.44614-0.02070-0.52543-0.24760
   3 -11  -2   16.02    3.97   1 0.25645 0.01697-0.30359-0.77133-0.91763-0.63620
   3  11  -2   18.57    3.88   1-0.61743-0.39523-0.06313 0.48967 0.78408 0.77718
   3  11  -2    7.89    2.06   1-0.46733-0.23803-0.11752 0.43231 0.87623 0.86973
  -3  11   2   19.38    2.80   1-0.77640-0.53106 0.34708 0.81147 0.52605 0.24388
   3 -11  -1   19.69    3.36   1-0.68685-0.96293 0.52958 0.06595-0.49776-0.26154
  -3 -11   1   25.49    3.60   1-0.69495-0.88705 0.51313-0.04195-0.50372-0.45974
   3 -11  -1   28.04    3.66   1 0.29382 0.02212-0.27124-0.73609-0.91656-0.67651
   3  11  -1   18.20    3.37   1-0.59891-0.40898-0.03827 0.51745 0.79989 0.75164
   3  11  -1   18.37    2.62   1-0.52424-0.32775-0.05396 0.49982 0.84985 0.80171
  -3  11   1   30.36    3.84   1-0.78090-0.50331 0.35984 0.82094 0.51058 0.26967
   3 -11   0   57.59    3.98   1-0.64314-0.95110 0.60790 0.14725-0.46562-0.27149
  -3 -11   0   54.03    4.46   1-0.72823-0.88842 0.43666-0.12164-0.52819-0.44261
   3 -11   0   64.19    4.50   1 0.33161 0.02768-0.23716-0.69914-0.91311-0.71444
   3  11   0   44.88    3.93   1-0.58045-0.42279-0.01436 0.54428 0.81416 0.72456
   3  11   0   54.91    3.96   1-0.55933-0.39507-0.01204 0.54507 0.82885 0.73946
  -3  11   0   54.69    4.20   1-0.78446-0.47461 0.37051 0.82832 0.49733 0.29768
   3 -11   1   17.08    2.95   1-0.59497-0.93477 0.67891 0.22145-0.43020-0.27775
  -3 -11  -1   16.64    3.44   1-0.75563-0.88390 0.35822-0.20331-0.54834-0.42115
   3 -11   1   22.81    3.02   1 0.36879 0.03270-0.20221-0.66100-0.90724-0.74966
   3  11   1   22.73    3.54   1-0.56236-0.43698 0.00831 0.56988 0.82685 0.69590
   3  11   1   17.51    3.75   1-0.58140-0.44937 0.01557 0.57603 0.81346 0.68282
  -3  11  -1   16.88    3.17   1-0.78699-0.44489 0.37850 0.83303 0.48721 0.32881
   3 -11   2   -1.35    2.91   1-0.54374-0.91539 0.74179 0.28752-0.39253-0.28175
  -3 -11  -2    6.12    3.31   1-0.77692-0.87327 0.27979-0.28497-0.56400-0.39519
   3  11   2    5.57    2.88   1-0.54501-0.45190 0.02943 0.59392 0.83791 0.66561
  -3  11  -2    2.31    2.57   1-0.41395-0.04460 0.17294 0.62788 0.89371 0.77702
   3  11   2    6.77    3.12   1-0.59506-0.49526 0.03322 0.59701 0.80299 0.63110
  -3  11  -2    7.04    2.69   1-0.78833-0.41398 0.38291 0.83415 0.48156 0.36442
   3 -11   3   35.50    4.15   1-0.49088-0.89437 0.79621 0.34512-0.35365-0.28455
  -3 -11  -3   35.50    3.77   1-0.79234-0.85687 0.20288-0.36479-0.57534-0.36426
   3  11   3   28.31    3.19   1-0.52888-0.46805 0.04855 0.61596 0.84730 0.63365
  -3  11  -3   32.64    3.95   1-0.44983-0.04822 0.13609 0.58811 0.88268 0.80733
   3  11   3   27.64    3.58   1-0.60292-0.53535 0.04358 0.61070 0.79660 0.58346
  -3  11  -3   28.05    3.04   1-0.78811-0.38150 0.38215 0.83011 0.48253 0.40665
   3 -11   4   26.59    3.53   1-0.43778-0.87288 0.84223 0.39407-0.31461-0.28771
  -3 -11  -4   15.03    2.86   1-0.80224-0.83478 0.13018-0.44071-0.58262-0.33000
   3  11   4   15.08    2.78   1-0.51455-0.48599 0.06515 0.63547 0.85497 0.59997
  -3  11  -4   24.63    3.85   1-0.48471-0.05081 0.09864 0.54774 0.86909 0.83510
   3  11   4   22.17    3.40   1-0.60655-0.57120 0.04841 0.61887 0.79356 0.53917
   3 -11   5    9.08    3.13   1-0.38499-0.85186 0.88074 0.43572-0.27579-0.29063
  -3 -11  -5    5.90    2.62   1-0.80752-0.80806 0.06267-0.51143-0.58649-0.29234
  -3  11  -5   12.77    3.43   1-0.51833-0.05216 0.06080 0.50699 0.85301 0.86036
   3  11   5    9.26    2.58   1-0.50278-0.50650 0.07852 0.65177 0.86083 0.56448
   3  11   5   15.30    3.05   1-0.60693-0.60382 0.04893 0.62272 0.79324 0.49760
   3 -11   6   -1.86    3.52   1-0.33323-0.83187 0.91238 0.47050-0.23773-0.29430
  -3 -11  -6    2.18    3.90   1-0.80910-0.77766 0.00133-0.57598-0.58766-0.25196
  -3  11  -6   -1.33    4.11   1-0.55051-0.05207 0.02279 0.46606 0.83451 0.88321
   3  11   6    2.44    3.10   1-0.60473-0.63384 0.04599 0.62312 0.79509 0.45820
   3 -11   7    6.47    3.16   1-0.28285-0.81326 0.93793 0.49919-0.20068-0.29899
  -3 -11  -7    0.28    4.13   1-0.80795-0.74452-0.05330-0.63384-0.58682-0.20957
  -3  11  -7    5.83    3.57   1-0.58112-0.05040-0.01521 0.42512 0.81367 0.90372
   3  11   7   -0.51    4.09   1-0.60038-0.66172 0.04021 0.62068 0.79869 0.42055
   3 -11   8    0.88    3.20   1-0.23406-0.79623 0.95815 0.52256-0.16480-0.30485
  -3 -11  -8    4.94    3.84   1-0.80497-0.70955-0.10111-0.68485-0.58462-0.16584
  -3  11  -8    6.15    4.11   1-0.61003-0.04704-0.05309 0.38433 0.79059 0.92199
   3  11   8    4.93    3.47   1-0.59418-0.68776 0.03207 0.61587 0.80368 0.38429
   3 -11   9    1.91    4.12   1-0.18690-0.78085 0.97372 0.54127-0.13012-0.31191
  -3 -11  -9   -0.56    3.97   1-0.80100-0.67562-0.14149-0.72739-0.58170-0.12011
  -3  11  -9    3.93    4.46   1-0.63718-0.04191-0.09071 0.34379 0.76535 0.93810
   3  11   9    1.42    3.68   1-0.58635-0.71215 0.02192 0.60905 0.80975 0.34911
   3 -11  10    3.59    3.67   1-0.14151-0.76708 0.98519 0.55576-0.09675-0.32047
  -3 -11 -10    2.87    3.85   1-0.79649-0.63920-0.17625-0.76534-0.57838-0.07523
  -3  11 -10   10.10    5.39   1-0.66249-0.03495-0.12797 0.30361 0.73804 0.95215
   3  11  10    6.88    2.79   1-0.57703-0.73506 0.01003 0.60049 0.81665 0.31476
   3 -11  11   -0.92    3.86   1-0.09755-0.75488 0.99314 0.56685-0.06442-0.32989
  -3 -11 -11   -1.36    4.08   1-0.79198-0.60279-0.20504-0.79731-0.57507-0.03036
  -3  11 -11    3.69    4.37   1-0.68594-0.02612-0.16479 0.26387 0.70875 0.96420
   3  11  11    3.52    4.01   1-0.56633-0.75660-0.00339 0.59040 0.82416 0.28102
   3 -11  12    0.38    4.34   1-0.05506-0.74415 0.99793 0.57477-0.03318-0.34038
  -3 -11 -12    9.81    4.50   1-0.78782-0.56672-0.22832-0.82378-0.57201 0.01425
  -3  11 -12   -0.82    5.53   1-0.70747-0.01538-0.20111 0.22463 0.67751 0.97432
   3  11  12    2.92    4.31   1-0.55432-0.77681-0.01817 0.57896 0.83210 0.24770
   3 -11  13    2.99    3.63   1-0.01393-0.73478 0.99989 0.57988-0.00293-0.35189
  -3 -11 -13   -2.84    4.50   1-0.78423-0.53122-0.24656-0.84521-0.56937 0.05845
  -3  11 -13   -9.46    4.85   1-0.72707-0.00270-0.23687 0.18595 0.64440 0.98255
   3  11  13    5.28    4.24   1-0.54104-0.79576-0.03418 0.56628 0.84029 0.21465
  -3 -13  11   -0.46    3.20   1-0.23535-0.78702 0.95767 0.34107-0.16575-0.51406
   3  13 -11   -5.21    4.40   1-0.75520-0.20049-0.29480 0.32441 0.58544 0.92442
  -3  13  11    1.90    3.61   1-0.67551-0.67741 0.14812 0.73437 0.72231 0.04250
  -3 -13  10    2.31    3.93   1-0.28140-0.80131 0.93859 0.31885-0.19962-0.50619
   3  13 -10   -3.47    4.56   1-0.74363-0.22119-0.26979 0.35233 0.61173 0.90935
  -3  13  10   -1.16    4.99   1-0.68765-0.65730 0.16760 0.75056 0.70642 0.06787
  -3 -13   9    2.29    3.61   1-0.32786-0.81599 0.91534 0.29245-0.23378-0.49861
   3 -13  -9    1.43    4.69   1-0.80609-0.86883 0.08631-0.49500-0.58545 0.00970
   3  13  -9    0.29    3.10   1-0.73122-0.24105-0.24486 0.38018 0.63666 0.89294
  -3  13   9   -1.81    2.98   1-0.69881-0.63620 0.18617 0.76585 0.69065 0.09335
  -3 -13   8    0.57    3.21   1-0.37448-0.83085 0.88763 0.26161-0.26806-0.49116
   3 -13  -8   11.43    3.76   1-0.80164-0.89637 0.13573-0.44237-0.58218-0.02856
   3  13  -8    4.75    4.00   1-0.71807-0.26018-0.22008 0.40788 0.66025 0.87517
  -3  13   8    9.77    5.14   1-0.70899-0.61412 0.20377 0.78017 0.67513 0.11910
  -3 -13   7   -1.47    4.09   1-0.42098-0.84558 0.85522 0.22605-0.30226-0.48362
   3 -13  -7   -2.04    3.53   1-0.79430-0.92102 0.19079-0.38409-0.57678-0.06470
   3 -13  -7   -4.59    3.51   1 0.21822 0.09801-0.33537-0.91038-0.91645-0.40197
   3  13  -7    0.54    3.88   1-0.70427-0.27865-0.19553 0.43535 0.68247 0.85604
  -3  13   7    1.84    3.05   1-0.71820-0.59108 0.22031 0.79342 0.66003 0.14525
  -3 -13   6    2.91    4.89   1-0.46697-0.85980 0.81791 0.18560-0.33608-0.47570
   3 -13  -6    7.57    2.96   1-0.78309-0.94214 0.25203-0.32032-0.56853-0.09879
   3 -13  -6    5.25    2.53   1 0.23719 0.08475-0.31977-0.89189-0.91732-0.44422
   3  13  -6    6.89    3.66   1-0.68992-0.29657-0.17131 0.46249 0.70332 0.83554
  -3  13   6    5.90    4.17   1-0.72644-0.56707 0.23568 0.80550 0.64554 0.17202
  -3 -13   5    1.48    4.08   1-0.51161-0.87324 0.77598 0.14082-0.36890-0.46649
   3 -13  -5    3.78    2.48   1-0.76781-0.95877 0.31603-0.25309-0.55730-0.12916
   3 -13  -5    2.09    3.81   1 0.25879 0.07412-0.30161-0.87085-0.91763-0.48592
   3  13  -5   10.55    3.53   1-0.67514-0.31407-0.14753 0.48920 0.72278 0.81365
  -3  13   5   -4.02    4.11   1-0.73371-0.54208 0.24973 0.81626 0.63190 0.19964
  -3 -13   4    6.24    3.47   1-0.55516-0.88494 0.72872 0.09037-0.40093-0.45684
   3 -13  -4   12.48    3.08   1-0.74774-0.97063 0.38277-0.18312-0.54254-0.15601
   3 -13  -4    8.82    3.52   1 0.28261 0.06572-0.28109-0.84744-0.91712-0.52679
   3  13  -4    6.98    3.40   1-0.66007-0.33128-0.12431 0.51533 0.74083 0.79036
  -3  13   4    6.17    4.88   1-0.73997-0.51609 0.26227 0.82551 0.61939 0.22839
  -3 -13   3    0.54    3.20   1-0.59659-0.89452 0.67673 0.03520-0.43139-0.44562
   3 -13  -3    3.00    3.50   1-0.72262-0.97743 0.45073-0.11195-0.52407-0.17915
   3 -13  -3    1.84    3.21   1 0.30825 0.05914-0.25840-0.82187-0.91553-0.56659
   3  13  -3    8.89    3.66   1-0.64488-0.34836-0.10180 0.54076 0.75747 0.76564
  -3  13   3   -2.51    3.60   1-0.74519-0.48905 0.27306 0.83302 0.60837 0.25863
  -3 -13   2    7.96    3.06   1-0.63527-0.90135 0.62047-0.02425-0.45983-0.43239
   3 -13  -2    3.78    3.85   1-0.69248-0.97921 0.51821-0.04124-0.50191-0.19860
   3 -13  -2    3.82    4.51   1 0.33532 0.05398-0.23374-0.79433-0.91264-0.60508
   3  13  -2   -0.52    4.75   1-0.62973-0.36549-0.08017 0.56531 0.77266 0.73948
  -3  13   2    2.89    3.94   1-0.74928-0.46089 0.28177 0.83844 0.59930 0.29082
   3 -13  -1   13.95    3.68   1-0.65758-0.97622 0.58376 0.02727-0.47624-0.21503
  -3 -13   1    4.95    4.18   1-0.67059-0.90484 0.56060-0.08730-0.48581-0.41670
   3 -13  -1   15.22    5.02   1 0.36285 0.04939-0.20789-0.76522-0.90835-0.64186
   3  13  -1    8.88    2.79   1-0.61486-0.38289-0.05962 0.58877 0.78637 0.71185
   3  13  -1    7.28    2.13   1-0.49333-0.25369-0.08911 0.55691 0.86526 0.79087
  -3  13   1    5.57    2.62   1-0.75212-0.43147 0.28794 0.84132 0.59279 0.32557
   3 -13   0   13.98    3.66   1-0.61875-0.96924 0.64552 0.09223-0.44769-0.22815
  -3 -13   0   15.94    3.98   1-0.70194-0.90469 0.49833-0.15259-0.50886-0.39780
   3 -13   0   17.58    2.96   1 0.39172 0.04602-0.17989-0.73435-0.90232-0.67719
   3  13   0   11.55    3.78   1-0.60051-0.40081-0.04039 0.61093 0.79859 0.68272
   3  13   0   19.86    3.13   1-0.52916-0.32176-0.04822 0.60114 0.84714 0.73150
  -3  13   0   12.23    2.47   1-0.75346-0.40056 0.29090 0.84100 0.58963 0.36366
   3 -13   1   13.12    3.16   1-0.57665-0.95898 0.70271 0.15260-0.41672-0.23886
  -3 -13  -1   20.69    3.52   1-0.72920-0.90003 0.43418-0.21996-0.52890-0.37624
   3  13   1    9.08    3.35   1-0.58699-0.41957-0.02274 0.63149 0.80927 0.65205
  -3  13  -1   26.02    3.83   1-0.42971-0.05060 0.15696 0.70749 0.88921 0.70490
   3  13   1   16.06    3.34   1-0.55273-0.37756-0.02010 0.63259 0.83311 0.67622
  -3  13  -1   17.03    2.75   1-0.75291-0.36775 0.28968 0.83649 0.59093 0.40623
   3 -13   2    9.82    3.35   1-0.53211-0.94629 0.75459 0.20767-0.38397-0.24778
  -3 -13  -2    9.29    3.08   1-0.75202-0.89093 0.36971-0.28766-0.54568-0.35141
   3  13   2    6.06    3.07   1-0.57465-0.43950-0.00701 0.65014 0.81836 0.61979
  -3  13  -2    3.28    3.52   1-0.45842-0.04704 0.12702 0.67464 0.87960 0.73664
   3  13   2    7.16    2.41   1-0.56812-0.42518-0.00116 0.65486 0.82293 0.62479
   3 -13   3    4.80    3.38   1-0.48596-0.93199 0.80081 0.25708-0.35004-0.25553
  -3 -13  -3    5.05    3.30   1-0.77041-0.87740 0.30617-0.35442-0.55921-0.32332
   3  13   3    6.14    3.90   1-0.56392-0.46105 0.00638 0.66646 0.82580 0.58587
  -3  13  -3    7.61    4.14   1-0.48701-0.04335 0.09611 0.64080 0.86809 0.76647
   3  13   3   -0.36    3.23   1-0.57771-0.46700 0.01089 0.67025 0.81616 0.57677
   3 -13   4    5.89    3.23   1-0.43915-0.91676 0.84114 0.30032-0.31561-0.26333
  -3 -13  -4   -0.00    3.46   1-0.78470-0.85983 0.24423-0.41919-0.56972-0.29146
   3  13   4   -1.72    2.82   1-0.55533-0.48473 0.01694 0.67994 0.83145 0.55018
  -3  13  -4    2.81    3.24   1-0.51522-0.03929 0.06438 0.60616 0.85463 0.79436
   3  13   4    5.60    4.26   1-0.58299-0.50451 0.01761 0.68031 0.81228 0.53163
   3 -13   5   14.55    4.48   1-0.39195-0.90133 0.87604 0.33837-0.28091-0.27036
  -3 -13  -5    9.45    3.30   1-0.79505-0.83820 0.18592-0.48072-0.57733-0.25753
  -3  13  -5    9.84    5.03   1-0.54285-0.03464 0.03202 0.57088 0.83921 0.82029
   3  13   5    6.76    4.78   1-0.58493-0.53867 0.02009 0.68612 0.81083 0.48894
   3 -13   6   -1.56    4.14   1-0.34496-0.88611 0.90571 0.37117-0.24635-0.27754
  -3 -13  -6    2.05    3.15   1-0.80209-0.81325 0.13161-0.53824-0.58251-0.22116
  -3  13  -6    4.68    3.69   1-0.56971-0.02923-0.00082 0.53511 0.82183 0.84427
   3  13   6    1.20    4.05   1-0.58416-0.57013 0.01911 0.68847 0.81140 0.44826
   3 -13   7    1.01    3.28   1-0.29851-0.87143 0.93051 0.39912-0.21220-0.28512
  -3 -13  -7    5.32    3.70   1-0.80639-0.78556 0.08190-0.59117-0.58567-0.18278
  -3  13  -7    1.63    3.42   1-0.59566-0.02291-0.03401 0.49900 0.80251 0.86629
   3  13   7    2.22    3.98   1-0.58115-0.59935 0.01525 0.68795 0.81365 0.40925
   3 -13   8   14.49    4.94   1-0.25284-0.85754 0.95087 0.42262-0.17861-0.29327
  -3 -13  -8   12.24    3.91   1-0.80854-0.75572 0.03715-0.63912-0.58725-0.14282
  -3  13  -8   13.03    4.35   1-0.62055-0.01552-0.06742 0.46268 0.78125 0.88638
   3  13   8   13.81    4.00   1-0.57620-0.62663 0.00897 0.68500 0.81725 0.37161
   3 -13   9   -0.96    3.76   1-0.20809-0.84456 0.96719 0.44208-0.14571-0.30211
  -3 -13  -9   -4.66    4.11   1-0.80910-0.72428-0.00246-0.68195-0.58766-0.10168
  -3  13  -9    5.03    4.08   1-0.64428-0.00697-0.10093 0.42624 0.75809 0.90458
   3  13   9   -2.80    3.69   1-0.56954-0.65220 0.00060 0.67997 0.82196 0.33506
   3 -13  10    5.21    3.15   1-0.16449-0.83256 0.97981 0.45771-0.11364-0.31199
  -3 -13 -10    3.88    5.21   1-0.80855-0.69174-0.03695-0.71966-0.58725-0.05974
  -3  13 -10    5.01    3.41   1-0.66674 0.00284-0.13446 0.38980 0.73306 0.92089
   3  13  10    0.99    4.94   1-0.56133-0.67622-0.00958 0.67311 0.82753 0.29938
   3 -13  11   -4.52    4.41   1-0.12177-0.82160 0.98914 0.47018-0.08223-0.32232
  -3 -13 -11   -1.81    4.53   1-0.80732-0.65853-0.06643-0.75235-0.58635-0.01729
  -3  13 -11    5.66    4.77   1-0.68784 0.01401-0.16790 0.35344 0.70617 0.93535
   3  13  11    1.07    4.59   1-0.55168-0.69880-0.02137 0.66465 0.83377 0.26438
  -3 -15   9    2.86    4.27   1-0.32744-0.85809 0.91556 0.20002-0.23347-0.47292
   3  15  -9    6.37    6.33   1-0.73423-0.20202-0.25076 0.46696 0.63088 0.86088
  -3  15   9    6.00    4.92   1-0.67374-0.56720 0.14532 0.81731 0.72453 0.10138
  -3 -15   8   12.40    5.19   1-0.37074-0.86962 0.89003 0.17134-0.26531-0.46302
   3  15  -8    8.54    5.85   1-0.72243-0.22249-0.22812 0.49252 0.65272 0.84137
  -3  15   8    4.25    3.71   1-0.68274-0.54482 0.15963 0.82830 0.71300 0.13066
  -3 -15   7   -2.64    4.66   1-0.41361-0.88072 0.86070 0.13887-0.29683-0.45281
   3  15  -7    4.17    4.73   1-0.71021-0.24254-0.20593 0.51763 0.67319 0.82050
  -3  15   7    3.50    4.42   1-0.69095-0.52078 0.17302 0.83840 0.70188 0.16080
  -3 -15   6   -1.84    4.82   1-0.45576-0.89109 0.82753 0.10256-0.32783-0.44206
   3 -15  -6   -3.32    4.50   1-0.75224-0.95385 0.36900-0.29596-0.54585-0.05063
   3 -15  -6   -2.97    3.54   1 0.33431 0.14001-0.23467-0.89964-0.91277-0.41355
   3  15  -6   -5.68    3.94   1-0.69768-0.26230-0.18427 0.54221 0.69229 0.79824
  -3  15   6    2.25    3.66   1-0.69808-0.49566 0.18495 0.84705 0.69171 0.19188
  -3 -15   5    3.49    3.61   1-0.49649-0.90064 0.79087 0.06307-0.35778-0.42995
   3 -15  -5    8.04    5.51   1-0.73400-0.96753 0.42159-0.24014-0.53243-0.07882
   3 -15  -5    3.43    4.25   1 0.34895 0.12243-0.22104-0.88313-0.91069-0.45285
   3  15  -5    9.56    4.64   1-0.68500-0.28188-0.16327 0.56613 0.71001 0.77461
  -3  15   5    4.88    3.89   1-0.70409-0.46941 0.19523 0.85404 0.68273 0.22417
  -3 -15   4    4.27    2.91   1-0.53618-0.90848 0.75017 0.01918-0.38696-0.41746
   3 -15  -4    0.81    3.26   1-0.71213-0.97758 0.47564-0.18287-0.51635-0.10435
   3 -15  -4    4.76    4.09   1 0.36505 0.10645-0.20579-0.86452-0.90795-0.49117
   3  15  -4    1.79    5.33   1-0.67228-0.30145-0.14305 0.58927 0.72633 0.74958
  -3  15   4    2.72    4.27   1-0.70889-0.44195 0.20360 0.85913 0.67528 0.25798
  -3 -15   3    4.47    4.04   1-0.57402-0.91448 0.70599-0.02818-0.41479-0.40362
   3 -15  -3    8.41    4.18   1-0.68658-0.98395 0.53012-0.12517-0.49756-0.12717
   3 -15  -3   12.73    4.06   1 0.38366 0.09282-0.18781-0.84367-0.90417-0.52876
   3  15  -3    4.39    3.60   1-0.65971-0.32115-0.12376 0.61147 0.74125 0.72315
  -3  15   3    0.67    3.13   1-0.71235-0.41316 0.20975 0.86199 0.66973 0.29369
  -3 -15   2    7.17    4.52   1-0.60962-0.91824 0.65870-0.07866-0.44097-0.38812
   3 -15  -2    7.49    4.19   1-0.65734-0.98667 0.58417-0.06814-0.47606-0.14777
   3  15  -2   18.43    5.13   1-0.64747-0.34118-0.10558 0.63258 0.75474 0.69529
  -3  15   2    2.36    3.33   1-0.41455-0.09023 0.17233 0.82429 0.89355 0.55891
  -3  15   2    6.05    3.99   1-0.71429-0.38284 0.21321 0.86217 0.66657 0.33179
   3 -15  -1    2.81    3.55   1-0.62493-0.98610 0.63634-0.01278-0.45223-0.16561
  -3 -15   1   -4.01    3.77   1-0.64258-0.91936 0.60881-0.13175-0.46521-0.37069
   3  15  -1    0.86    3.65   1-0.63576-0.36175-0.08869 0.65238 0.76677 0.66597
  -3  15   1    3.55    3.58   1-0.43514-0.07854 0.15138 0.80043 0.88754 0.59425
  -3  15   1   10.06    4.35   1-0.71438-0.35067 0.21337 0.85904 0.66643 0.37290
   3 -15   0    4.62    3.22   1-0.58959-0.98260 0.68607 0.04012-0.42624-0.18129
  -3 -15   0   -2.05    4.58   1-0.67259-0.91751 0.55693-0.18681-0.48727-0.35108
   3  15   0   14.67    3.51   1-0.62483-0.38309-0.07332 0.67067 0.77731 0.63516
  -3  15   0    5.51    4.12   1-0.45668-0.06781 0.12887 0.77500 0.88024 0.62830
   3 -15   1   -2.66    3.42   1-0.55177-0.97664 0.73265 0.08990-0.39843-0.19516
  -3 -15  -1   -0.67    3.42   1-0.69928-0.91267 0.50401-0.24274-0.50691-0.32877
   3  15   1    0.87    3.10   1-0.61495-0.40548-0.05974 0.68717 0.78629 0.60280
  -3  15  -1   -0.91    4.65   1-0.47892-0.05777 0.10497 0.74818 0.87155 0.66096
   3 -15   2    5.19    3.65   1-0.51200-0.96871 0.77559 0.13603-0.36919-0.20759
  -3 -15  -2   -2.39    3.86   1-0.72274-0.90421 0.45044-0.29954-0.52415-0.30441
   3  15   2    3.25    3.31   1-0.60644-0.42925-0.04827 0.70156 0.79365 0.56881
  -3  15  -2    2.87    4.93   1-0.50161-0.04819 0.07984 0.72013 0.86139 0.69215
   3  15   2    2.14    4.11   1-0.53186-0.34577-0.04505 0.70321 0.84562 0.62123
   3 -15   3    1.31    3.09   1-0.47089-0.95925 0.81447 0.17785-0.33895-0.21954
  -3 -15  -3   -1.38    3.21   1-0.74279-0.89234 0.39728-0.35592-0.53890-0.27754
  -3  15  -3   -1.87    3.16   1-0.52453-0.03883 0.05362 0.69100 0.84969 0.72180
   3  15   3    7.76    4.39   1-0.54390-0.39004-0.03076 0.72083 0.83858 0.57293
   3 -15   4    2.93    4.78   1-0.42875-0.94888 0.84930 0.21582-0.30797-0.23029
  -3 -15  -4   15.53    4.28   1-0.75952-0.87716 0.34538-0.41105-0.55120-0.24823
  -3  15  -4    3.66    4.29   1-0.54747-0.02949 0.02647 0.66093 0.83640 0.74986
   3  15   4    5.35    4.32   1-0.55135-0.42972-0.02178 0.73315 0.83398 0.52709
   3 -15   5    3.01    4.04   1-0.38604-0.93794 0.88004 0.24970-0.27656-0.24062
  -3 -15  -5   -2.44    3.91   1-0.77313-0.85884 0.29548-0.46417-0.56120-0.21663
  -3  15  -5   -3.52    4.09   1-0.57024-0.01999-0.00147 0.63006 0.82147 0.77628
   3  15   5    1.63    3.75   1-0.55521-0.46581-0.01708 0.74118 0.83152 0.48338
   3 -15   6    3.48    4.68   1-0.34311-0.92678 0.90678 0.27958-0.24499-0.25079
  -3 -15  -6    1.47    3.65   1-0.78400-0.83775 0.24765-0.51474-0.56920-0.18222
  -3  15  -6   -5.43    5.10   1-0.59266-0.01014-0.03009 0.59851 0.80488 0.80104
   3  15   6    0.28    4.66   1-0.55617-0.49900-0.01591 0.74569 0.83091 0.44151
   3 -15   7   -3.80    3.55   1-0.30023-0.91568 0.92967 0.30561-0.21346-0.26100
  -3 -15  -7    6.64    4.37   1-0.79223-0.81399 0.20357-0.56203-0.57525-0.14672
  -3  15  -7   -1.47    3.43   1-0.61460 0.00019-0.05927 0.56642 0.78660 0.82411
   3  15   7    0.58    4.52   1-0.55471-0.52977-0.01769 0.74724 0.83184 0.40120
   3 -15   8    2.75    3.46   1-0.25763-0.90484 0.94892 0.32801-0.18213-0.27141
  -3 -15  -8    4.25    3.59   1-0.79831-0.78808 0.16310-0.60571-0.57973-0.10965
  -3  15  -8   -3.50    4.23   1-0.63590 0.01116-0.08890 0.53387 0.76662 0.84548
   3  15   8   -4.33    4.34   1-0.55117-0.55846-0.02199 0.74627 0.83409 0.36220
  -3 -17   4   -3.69    5.93   1-0.51143-0.92627 0.77617-0.04746-0.36877-0.37386
   3  17  -4    6.20    4.57   1-0.68835-0.27548-0.16874 0.65625 0.70547 0.70245
  -3 -17   3    0.09    4.27   1-0.54655-0.92954 0.73863-0.08819-0.39459-0.35800
   3  17  -3    2.57    6.08   1-0.67818-0.29758-0.15233 0.67558 0.71892 0.67456
  -3 -17   2    3.67    3.49   1-0.57978-0.93093 0.69875-0.13126-0.41903-0.34077
   3  17  -2   -1.79    4.93   1-0.66850-0.32017-0.13717 0.69366 0.73094 0.64523
  -3  17   2    9.49    5.08   1-0.47663-0.11026 0.10747 0.85211 0.87251 0.51160
  -3 -17   1    0.55    4.36   1-0.61088-0.93019 0.65691-0.17629-0.44190-0.32197
   3  17  -1   -1.64    4.12   1-0.65951-0.34345-0.12345 0.71030 0.74148 0.61441
  -3  17   1    2.79    3.99   1-0.49196-0.09332 0.09063 0.83235 0.86588 0.54632
   3 -17   0   -0.12    4.75   1-0.55577-0.99132 0.72801-0.01057-0.40137-0.13102
  -3 -17   0    2.27    4.51   1-0.63962-0.92708 0.61357-0.22282-0.46303-0.30143
   3  17   0    6.76    4.49   1-0.65143-0.36765-0.11139 0.72527 0.75048 0.58206
  -3  17   0   -0.70    4.40   1-0.50838-0.07746 0.07219 0.81100 0.85810 0.57989
   3 -17   1   -7.84    5.29   1-0.52122-0.98861 0.76614 0.03073-0.37597-0.14728
  -3 -17  -1   -1.79    4.09   1-0.66583-0.92144 0.56924-0.27033-0.48230-0.27902
  -3  17  -1    0.63    4.00   1-0.52565-0.06246 0.05232 0.78821 0.84908 0.61222
   3 -17   2   -3.32    3.82   1-0.48504-0.98428 0.80166 0.06945-0.34936-0.16235
  -3 -17  -2   -3.79    4.67   1-0.68931-0.91335 0.52465-0.31794-0.49957-0.25435
  -3  17  -2    4.92    4.73   1-0.54357-0.04811 0.03115 0.76412 0.83878 0.64327
   3 -17   3   -1.12    3.95   1-0.44770-0.97858 0.83423 0.10494-0.32190-0.17710
  -3 -17  -3    1.77    4.27   1-0.71020-0.90231 0.48005-0.36577-0.51493-0.22810
  -3  17  -3    2.64    5.92   1-0.56194-0.03420 0.00883 0.73888 0.82712 0.67296
  -4   0  17   -1.78    3.14   1 0.38097-0.06165 0.87875 0.86817 0.28746-0.49241
  -4   0  16   40.52    4.13   1 0.35573-0.05504 0.89506 0.88128 0.26890-0.46937
   4   0 -16   38.37    4.11   1-0.75411-0.33567-0.65547-0.63707-0.04085 0.69387
  -4   0  15   -0.38    2.78   1 0.32994-0.04898 0.91031 0.89332 0.24993-0.44673
   4   0 -15   -1.70    3.29   1-0.76373-0.37758-0.64546-0.62414-0.00937 0.68401
  -4   0  15   -2.64    2.96   1-0.60832-0.99439 0.05079 0.03439 0.79205 0.09996
  -4   0  14   14.86    3.07   1 0.30350-0.04357 0.92453 0.90434 0.23049-0.42457
   4   0 -14   25.25    3.82   1-0.77190-0.41804-0.63541-0.61118 0.02004 0.67208
  -4   0  14   21.49    3.87   1-0.63704-0.99088 0.09051 0.07078 0.76549 0.11465
  -4   0  13   -2.08    3.24   1 0.27625-0.03896 0.93775 0.91436 0.21045-0.40300
   4   0 -13    1.37    4.14   1-0.77877-0.45719-0.62552-0.59836 0.04727 0.65797
  -4   0  13    2.72    3.12   1-0.66451-0.98612 0.13104 0.10797 0.73569 0.12610
  -4   0  12   -1.81    3.43   1 0.24801-0.03535 0.95000 0.92341 0.18968-0.38216
   4   0 -12   -1.53    2.96   1-0.78444-0.49515-0.61598-0.58590 0.07215 0.64151
  -4   0  12    0.73    2.62   1-0.69058-0.98023 0.17239 0.14550 0.70240 0.13401
  -4   0  11   -3.49    2.93   1 0.21848-0.03303 0.96127 0.93148 0.16797-0.36227
   4   0 -11   -1.98    2.78   1-0.78904-0.53203-0.60703-0.57403 0.09441 0.62242
  -4   0  11   -2.72    2.70   1-0.71561-0.97302 0.21561 0.18544 0.66437 0.13723
  -4   0  10    5.47    2.74   1 0.18728-0.03238 0.97154 0.93855 0.14503-0.34361
   4   0 -10   12.52    3.15   1-0.79265-0.56793-0.59897-0.56306 0.11367 0.60034
  -4   0  10    7.89    2.79   1-0.73926-0.96441 0.26081 0.22735 0.62085 0.13497
  -4   0   9    0.85    2.29   1 0.15381-0.03399 0.98073 0.94454 0.12042-0.32661
   4   0  -9   -2.13    2.17   1-0.79534-0.60290-0.59218-0.55334 0.12939 0.57472
  -4   0   9   -3.82    2.84   1-0.76119-0.95409 0.30857 0.27182 0.57040 0.12578
  -4   0   8    1.69    2.14   1 0.11623-0.03890 0.98887 0.94881 0.09278-0.31341
   4   0  -8   -3.37    2.57   1-0.79715-0.63700-0.58713-0.54537 0.14080 0.54479
  -4   0   8   -1.46    2.27   1-0.78081-0.94145 0.35956 0.31952 0.51093 0.10756
  -4   0   7    0.85    2.10   1 0.07486-0.04851 0.99524 0.95204 0.06236-0.30209
   4   0  -7    1.37    1.92   1-0.79804-0.67018-0.58444-0.53976 0.14677 0.50941
  -4   0   7    3.33    2.53   1-0.79692-0.92531 0.41457 0.37124 0.43936 0.07726
  -4   0   6   10.27    2.27   1 0.02638-0.06522 0.99929 0.95295 0.02671-0.29599
   4   0  -6    4.11    2.43   1-0.79787-0.70229-0.58497-0.53737 0.14561 0.46691
  -4   0   6    5.13    2.30   1-0.80729-0.90361 0.47427 0.42726 0.35119 0.03046
  -4   0   5    0.04    1.61   1-0.03379-0.09365 0.99927 0.94980-0.01753-0.29850
   4   0  -5   -0.90    2.12   1-0.79620-0.73291-0.58982-0.53930 0.13474 0.41470
  -4   0   5   -2.09    2.16   1-0.80756-0.87159 0.53885 0.48861 0.23973-0.03973
  -4   0   4   13.62    2.25   1-0.11499-0.14308 0.99035 0.93774-0.07724-0.31647
   4   0  -4    9.63    2.56   1-0.79201-0.76100-0.60049-0.54706 0.11009 0.34870
  -4   0   4   12.48    2.62   1-0.78942-0.82116 0.60624 0.55277 0.09632-0.14189
  -4   0   3   -0.91    2.18   1-0.23803-0.23445 0.95666 0.90090-0.16772-0.36522
   4   0  -3   -0.86    2.60   1-0.78287-0.78415-0.61877-0.56241 0.06500 0.26227
  -4   0   3    1.43    2.47   1-0.73800-0.73745 0.66902 0.61232-0.08802-0.28498
  -4   0   2  247.33    6.94   1-0.45026-0.41491 0.83211 0.77322-0.32379-0.47955
   4   0  -2  274.01    6.72   1-0.76312-0.79668-0.64615-0.58687-0.01147 0.14444
  -4   0   2  269.21    6.42   1-0.63183-0.59900 0.70895 0.64901-0.31331-0.46901
  -4   0   1   -1.29    2.93   1-0.75200-0.68538 0.36975 0.30770-0.54567-0.65997
   4   0  -1   -1.62    2.39   1-0.80829-0.87467 0.04483 0.10707-0.58706-0.47273
   4   0  -1    0.00    2.15   1-0.71923-0.78509-0.68118-0.61898-0.13669-0.02210
  -4   0   1    1.30    2.12   1-0.45658-0.39145 0.69785 0.63468-0.55184-0.66628
  -4   0   0    2.79    2.86   1-0.75034-0.65198-0.37490-0.44078-0.54445-0.61694
   4   0   0    7.31    2.44   1-0.62080-0.71895-0.71027-0.64518-0.33182-0.25854
   4   0   0    8.27    2.25   1 0.22875 0.13177-0.63077-0.56417 0.74148 0.81507
  -4   0  -1   -3.10    1.94   1-0.56448-0.43421-0.71768-0.78675-0.40777-0.43870
   4   0   1   -1.06    2.08   1-0.41721-0.54764-0.68838-0.62042-0.59334-0.56138
   4   0   1   -2.74    2.26   1 0.02025-0.10905-0.51900-0.44903 0.85453 0.88683
  -4   0  -2  390.91    7.63   1-0.44800-0.28583-0.83398-0.90623-0.32212-0.31149
   4   0   2  395.31    7.40   1-0.09432-0.25705-0.55053-0.47977-0.82946-0.83889
   4   0   2  384.69    7.85   1-0.13863-0.30017-0.41095-0.33758 0.90105 0.89214
   4   0   3    0.98    2.51   1 0.37923 0.18481 0.87992 0.95451 0.28618 0.23395
   4   0   3   -2.72    1.80   1 0.23626 0.04133-0.32054-0.24696-0.91729-0.96814
   4   0   3   -2.49    2.64   1-0.24710-0.44089-0.32555-0.24889 0.91266 0.86235
   4   0   4   16.17    2.41   1 0.34677 0.12049 0.90052 0.97831 0.26231 0.16847
  -4   0  -4   16.18    2.08   1-0.45953-0.23234 0.12585 0.04893 0.87919 0.97140
   4   0   4   15.80    2.50   1-0.31703-0.54301-0.26500-0.18495 0.91063 0.81909
   4   0   5    0.31    2.04   1 0.33111 0.07298 0.90964 0.99063 0.25080 0.11536
  -4   0  -5   -0.36    1.62   1-0.59988-0.34041-0.03955-0.11940 0.79910 0.93266
   4   0   5    1.25    1.84   1-0.36124-0.61941-0.22426-0.14083 0.90509 0.77232
   4   0   6   33.59    3.07   1 0.32560 0.03562 0.91274 0.99693 0.24674 0.06970
  -4   0  -6   29.31    2.38   1-0.68277-0.39103-0.15967-0.24243 0.71297 0.88787
   4   0   6   23.67    2.61   1-0.38830-0.67866-0.19830-0.11148 0.89993 0.72593
   4   0   7   -0.22    2.75   1 0.32660 0.00477 0.91218 0.99957 0.24748 0.02883
  -4   0  -7   -1.52    1.30   1-0.73346-0.40945-0.24925-0.33493 0.63237 0.84862
   4   0   7   -1.46    2.22   1-0.40368-0.72623-0.18319-0.09298 0.89637 0.68112
   4   0   8   43.22    3.20   1 0.33201-0.02166 0.90913 0.99972 0.25146-0.00879
  -4   0  -8   48.16    2.92   1-0.76556-0.40927-0.31904-0.40764 0.55868 0.81628
   4   0   8   43.97    3.06   1-0.41079-0.76553-0.17611-0.08251 0.89455 0.63808
   4   0   9   -4.45    2.62   1 0.34053-0.04500 0.90422 0.99801 0.25772-0.04413
  -4   0  -9    0.34    2.26   1-0.78612-0.39756-0.37573-0.46725 0.49074 0.78969
   4   0   9   -0.24    2.38   1-0.41181-0.79874-0.17509-0.07810 0.89429 0.59658
   4   0  10    5.65    3.15   1 0.35130-0.06608 0.89778 0.99477 0.26564-0.07781
  -4   0 -10   12.63    2.14   1-0.79896-0.37812-0.42338-0.51782 0.42708 0.76738
   4   0  10   12.88    2.72   1-0.40815-0.82727-0.17874-0.07836 0.89524 0.55630
   4   0  11   -8.19    3.33   1 0.36376-0.08547 0.89003 0.99022 0.27480-0.11026
  -4   0 -11   -1.11    2.45   1-0.80618-0.35307-0.46454-0.56190 0.36641 0.74806
   4   0  11    0.19    1.99   1-0.40075-0.85207-0.18608-0.08231 0.89708 0.51691
   4   0  12   32.83    3.87   1 0.37751-0.10357 0.88107 0.98446 0.28492-0.14175
  -4   0 -12   34.46    3.94   1-0.80900-0.32361-0.50082-0.60110 0.30771 0.73072
   4   0  12   35.60    3.64   1-0.39025-0.87375-0.19641-0.08925 0.89951 0.47810
   4   0  13    0.80    2.64   1 0.39227-0.12067 0.87099 0.97758 0.29577-0.17250
  -4   0 -13   -0.75    2.47   1-0.80809-0.29043-0.53328-0.63647 0.25017 0.71452
   4   0  13    2.29    3.04   1-0.37705-0.89275-0.20919-0.09864 0.90225 0.43961
  -4   0 -14   90.95    6.79   1-0.41643 0.12863-0.85862-0.96911-0.29891 0.21041
   4   0  14  111.44    4.76   1-0.36146-0.90935-0.22405-0.11011 0.90506 0.40118
  -4   0 -15   -1.58    4.12   1-0.43263 0.14434-0.84629-0.95996-0.31082 0.24006
   4   0  15    1.84    3.53   1-0.34366-0.92373-0.24071-0.12338 0.90772 0.36260
  -4   0 -16   28.78    3.82   1-0.44934 0.15954-0.83287-0.94973-0.32311 0.26933
   4   0  16   24.75    3.93   1-0.32374-0.93601-0.25894-0.13822 0.91001 0.32367
  -4   0 -17   -3.15    5.13   1-0.46645 0.17433-0.81836-0.93841-0.33569 0.29830
  -4  -2  17    1.88    4.01   1 0.29443-0.19055 0.92909 0.82582 0.22382-0.53076
   4  -2 -17   -1.95    4.14   1-0.48169-0.08043-0.80475-0.88536-0.34689 0.45788
  -4  -2  16    1.08    3.65   1 0.26273-0.19039 0.94380 0.83733 0.20051-0.51246
   4  -2 -16   -6.52    4.58   1-0.46377-0.09443-0.82069-0.89811-0.33372 0.42950
   4   2 -16    0.15    4.41   1-0.78925-0.32884-0.60660-0.49548 0.09544 0.80395
  -4   2  16   -0.11    3.76   1-0.61481-0.98996 0.05956 0.13873 0.78641 0.02682
  -4  -2  15   -3.12    3.35   1 0.22978-0.19149 0.95714 0.84747 0.17628-0.49509
   4  -2 -15    6.86    3.51   1-0.44623-0.10880-0.83542-0.90966-0.32082 0.40084
   4  -2 -15    3.20    4.26   1-0.70115-0.35707-0.69020-0.76164-0.17890 0.54073
   4   2 -15   -0.10    3.17   1-0.79559-0.36748-0.59150-0.47746 0.13094 0.79811
  -4   2  15   -0.44    3.81   1-0.64118-0.98410 0.09645 0.17229 0.76130 0.04295
  -4  -2  14   -1.54    3.01   1 0.19532-0.19410 0.96905 0.85618 0.15094-0.47882
   4  -2 -14   -0.56    4.47   1-0.42917-0.12364-0.84898-0.92003-0.30828 0.37182
   4  -2 -14    3.29    2.92   1-0.71091-0.39900-0.68562-0.75410-0.15661 0.52164
   4   2 -14   -1.18    3.05   1-0.80058-0.40478-0.57604-0.45898 0.16505 0.79087
  -4   2  14    1.41    3.45   1-0.66619-0.97688 0.13361 0.20612 0.73371 0.05662
  -4  -2  13    1.05    2.34   1 0.15903-0.19853 0.97942 0.86335 0.12425-0.46390
   4  -2 -13    2.96    2.37   1-0.41273-0.13911-0.86134-0.92921-0.29619 0.34236
   4  -2 -13   -0.11    2.14   1-0.71878-0.43915-0.68144-0.74700-0.13780 0.49911
   4   2 -13    0.56    2.60   1-0.80430-0.44078-0.56036-0.44039 0.19768 0.78215
  -4  -2  13   -0.31    2.95   1-0.61210-0.97685 0.05589-0.05941 0.78879 0.20546
  -4   2  13    0.05    2.43   1-0.68965-0.96851 0.17088 0.23955 0.70368 0.06771
  -4   2  12    0.12    3.02   1 0.38666 0.14564 0.87489 0.94098 0.29164-0.30550
  -4  -2  12    0.69    3.28   1 0.11987-0.20480 0.98818 0.86800 0.09546-0.45234
   4  -2 -12   -0.91    2.49   1-0.72484-0.47751-0.67788-0.74053-0.12272 0.47285
   4   2 -12    1.41    3.29   1-0.80689-0.47564-0.54456-0.42166 0.22886 0.77198
  -4  -2  12   -0.94    2.51   1-0.64350-0.97602 0.09981-0.01883 0.75890 0.21682
  -4   2  12    1.95    2.43   1-0.71200-0.95860 0.20911 0.27451 0.67031 0.07561
  -4   2  11    8.56    2.67   1 0.37195 0.16279 0.88475 0.94764 0.28083-0.27471
  -4  -2  11    6.26    2.84   1 0.07845-0.21445 0.99479 0.87147 0.06500-0.44105
   4  -2 -11    7.75    3.43   1-0.72905-0.51401-0.67523-0.73496-0.11193 0.44229
   4   2 -11    6.46    2.97   1-0.80844-0.50947-0.52874-0.40292 0.25854 0.76031
  -4  -2  11    7.70    2.49   1-0.67419-0.97449 0.14603 0.02406 0.72396 0.22313
  -4   2  11    4.91    3.31   1-0.73292-0.94727 0.24817 0.31028 0.63342 0.07998
  -4   2  10    9.71    3.03   1 0.35864 0.18133 0.89325 0.95295 0.27104-0.24289
  -4  -2  10    4.94    2.66   1 0.03348-0.22766 0.99892 0.87247 0.03193-0.43238
   4  -2 -10    6.25    2.39   1-0.73125-0.54848-0.67378-0.73059-0.10620 0.40668
   4   2 -10   10.35    2.21   1-0.80907-0.54238-0.51305-0.38431 0.28665 0.74707
  -4  -2  10    4.96    2.08   1-0.70409-0.97230 0.19523 0.06948 0.68274 0.22316
  -4   2  10    4.25    3.03   1-0.75228-0.93438 0.28830 0.34712 0.59240 0.08022
  -4   2   9   21.74    2.47   1 0.34726 0.20180 0.90022 0.95672 0.26267-0.20965
  -4  -2   9   14.22    3.36   1-0.01605-0.24544 0.99986 0.87027-0.00449-0.42706
   4  -2  -9   14.99    2.28   1-0.73111-0.58064-0.67387-0.72776-0.10656 0.36498
   4   2  -9   20.60    3.15   1-0.80890-0.57448-0.49766-0.36601 0.31305 0.73212
  -4  -2   9   18.78    2.59   1-0.73343-0.96938 0.24919 0.12015 0.63243 0.21412
  -4   2   9   22.70    3.13   1-0.76985-0.91969 0.32977 0.38530 0.54641 0.07549
  -4   2   8   87.88    3.96   1 0.33865 0.22504 0.90531 0.95861 0.25634-0.17439
  -4  -2   8   87.94    4.14   1-0.07155-0.26919 0.99640 0.86367-0.04530-0.42613
   4  -2  -8   91.40    4.19   1-0.72811-0.60992-0.67584-0.72681-0.11438 0.31581
   4   2  -8   87.17    4.21   1-0.80805-0.60591-0.48280-0.34823 0.33754 0.71526
  -4  -2   8   91.43    4.01   1-0.76150-0.96519 0.30928 0.17696 0.56961 0.19255
  -4   2   8   99.18    4.93   1-0.78522-0.90281 0.37289 0.42514 0.49433 0.06466
  -4   2   7   23.23    2.52   1 0.33417 0.25242 0.90790 0.95800 0.25304-0.13607
  -4  -2   7   21.68    2.46   1-0.13497-0.30085 0.98657 0.85070-0.09194-0.43102
   4  -2  -7   27.94    2.88   1-0.72132-0.63541-0.67999-0.72803-0.13155 0.25730
   4   2  -7   29.13    2.89   1-0.80669-0.63682-0.46878-0.33129 0.35982 0.69620
  -4  -2   7   21.83    2.71   1-0.78675-0.95819 0.37775 0.24214 0.48817 0.15238
  -4   2   7   26.69    2.75   1-0.79773-0.88307 0.41799 0.46695 0.43461 0.04620
  -4   2   6   39.21    2.69   1 0.33625 0.28635 0.90671 0.95360 0.25457-0.09294
  -4  -2   6   39.78    3.37   1-0.20883-0.34308 0.96695 0.82796-0.14625-0.44358
   4  -2  -6   41.14    2.97   1-0.70922-0.65561-0.68645-0.73158-0.16053 0.18697
   4   2  -6   41.32    3.40   1-0.80501-0.66741-0.45601-0.31560 0.37947 0.67449
  -4  -2   6   49.19    3.16   1-0.80515-0.94448 0.45694 0.31768 0.37806 0.08377
  -4   2   6   41.66    3.38   1-0.80629-0.85959 0.46542 0.51065 0.36505 0.01788
  -4   2   5    0.78    1.58   1 0.34957 0.33152 0.89883 0.94253 0.26436-0.04154
  -4  -2   5    0.95    2.02   1-0.29687-0.39935 0.93131 0.78918-0.21099-0.46658
   4  -2  -5    0.98    1.99   1-0.68923-0.66794-0.69500-0.73726-0.20474 0.10146
   4   2  -5    0.94    2.66   1-0.80326-0.69793-0.44509-0.30176 0.39580 0.64947
  -4   2   5    2.16    2.54   1-0.80904-0.83005 0.51520 0.55720 0.28287-0.02304
  -4  -2   5    1.58    2.01   1-0.80638-0.91342 0.54827 0.40578 0.22167-0.03135
  -4   2   4    6.73    1.85   1 0.38497 0.39868 0.87605 0.91671 0.29040 0.02611
  -4  -2   4    7.65    2.36   1-0.40276-0.47347 0.86852 0.72325-0.28886-0.50271
   4  -2  -4    5.06    2.06   1-0.65756-0.66854-0.70432-0.74366-0.26746-0.00259
   4   2  -4    4.72    2.45   1-0.80177-0.72872-0.43695-0.29070 0.40772 0.62004
  -4   2   4    6.09    2.37   1-0.80289-0.79162 0.56692 0.60569 0.18425-0.08040
  -4  -2   4    4.81    1.99   1-0.76548-0.84024 0.64344 0.49772-0.00330-0.21508
  -4  -2   3   14.30    2.71   1-0.52686-0.56620 0.76021 0.61193-0.38011-0.55222
   4  -2  -3   12.91    2.07   1-0.48210-0.52757-0.80437-0.84037-0.34720-0.12423
   4  -2  -3   11.22    3.00   1-0.60802-0.65128-0.71136-0.74778-0.35251-0.12899
   4   2  -3   18.17    2.70   1-0.80099-0.76022-0.43301-0.28385 0.41339 0.58436
  -4   2   3   11.79    2.82   1-0.78278-0.73921 0.61893 0.65447 0.06458-0.15880
  -4  -2   3   15.84    2.05   1-0.63704-0.67951 0.70819 0.55924-0.30436-0.47487
  -4  -2   2   26.37    2.93   1-0.66131-0.66880 0.57726 0.42579-0.47898-0.60942
   4  -2  -2   30.19    2.92   1-0.68856-0.76593-0.52617-0.55899-0.49902-0.31761
   4  -2  -2   27.16    2.78   1-0.53239-0.60793-0.70986-0.74336-0.46114-0.27896
   4   2  -2   32.32    2.89   1-0.80153-0.79303-0.43573-0.28364 0.40948 0.53910
   4   2  -2   28.18    2.31   1 0.37810 0.38898-0.68746-0.53555 0.62002 0.74958
  -4   2   2   29.63    3.14   1-0.74073-0.66487 0.66696 0.69927-0.08044-0.26258
   4  -2  -1    8.64    1.62   1-0.58546-0.69487 0.69146 0.66083-0.42320-0.28362
  -4  -2   1   10.20    2.84   1-0.77045-0.74639 0.30603 0.15136-0.55923-0.64806
  -4   2   1    8.39    1.68   1-0.75906-0.64978-0.34693-0.31729-0.55086-0.69072
   4  -2  -1    9.12    2.66   1-0.42216-0.52998-0.68968-0.72033-0.58831-0.44747
   4   2  -1    7.14    2.63   1-0.80400-0.82777-0.44948-0.29447 0.38929 0.47756
   4   2  -1   11.37    2.27   1 0.09069 0.06926-0.56065-0.40537 0.82306 0.91152
  -4   2   1    9.25    2.80   1-0.66606-0.55791 0.70225 0.73133-0.25139-0.39227
   4  -2   0    7.40    2.63   1-0.15969-0.30113 0.98100 0.95349-0.11011-0.01250
  -4   2   0    4.34    2.28   1-0.51460-0.37335 0.77295 0.80039-0.37110-0.46901
  -4  -2   0    8.94    2.68   1-0.80902-0.75324-0.01438-0.17237-0.58760-0.63474
   4  -2   0    6.26    2.56   1-0.27506-0.41514-0.63956-0.66729-0.71784-0.61835
   4   2   0    9.18    2.44   1-0.80806-0.86412-0.48292-0.32499 0.33736 0.38428
   4   2   0    6.70    2.46   1-0.13870-0.19250-0.41089-0.25223 0.90106 0.94832
  -4   2   0    4.36    2.60   1-0.54966-0.40923 0.71125 0.73710-0.43816-0.53778
   4  -2   1    4.01    1.76   1-0.05340-0.22661 0.99806 0.97369-0.03196 0.02391
  -4  -2  -1    2.29    2.58   1-0.77289-0.68546-0.29642-0.45782-0.56103-0.56616
   4  -2   1    4.44    2.23   1-0.10017-0.27255-0.55384-0.57885-0.82657-0.76853
   4   2   1    3.96    3.54   1-0.80542-0.89374-0.55433-0.39348 0.20978 0.21535
   4   2   1    5.20    2.46   1-0.28787-0.37404-0.29080-0.12879 0.91244 0.91842
   4  -2   2   82.99    3.63   1 0.00103-0.20392 0.99996 0.97873 0.00807 0.02220
  -4  -2  -2   83.96    3.98   1-0.70400-0.58465-0.49386-0.65845-0.51037-0.47394
   4  -2   2   87.44    3.50   1 0.07905-0.12551-0.44068-0.46283-0.89417-0.87751
   4   2   2   86.79    3.61   1-0.70653-0.82728-0.68775-0.52407-0.16674-0.20234
   4  -2   2   85.70    3.78   1 0.22514 0.02032-0.62914-0.64781 0.74396 0.76152
   4   2   2   85.88    3.59   1-0.37874-0.49709-0.20757-0.04217 0.90192 0.86666
   4  -2   3   42.35    2.92   1 0.04005-0.19667 0.99852 0.98042 0.03676 0.00914
  -4  -2  -3   47.15    3.00   1-0.63675-0.48550-0.61813-0.78590-0.46092-0.38293
   4  -2   3   51.38    3.10   1 0.24195 0.00516-0.31580-0.33507-0.91745-0.94217
   4  -2   3   51.43    3.22   1 0.07282-0.16427-0.55045-0.56572 0.83168 0.80806
   4   2   3   45.61    3.09   1-0.43349-0.58404-0.15307 0.01571 0.88805 0.81156
   4  -2   4   -0.63    2.26   1 0.07249-0.19599 0.99552 0.98056 0.06062-0.00873
  -4  -2  -4   -0.24    2.45   1-0.58326-0.40010-0.69430-0.86526-0.42159-0.30203
   4  -2   4    2.58    2.28   1 0.37701 0.10798-0.19427-0.21062-0.90560-0.97158
   4  -2   4    0.19    1.51   1-0.04856-0.31784-0.47461-0.48654 0.87885 0.81378
   4   2   4   -1.86    2.07   1-0.46621-0.64895-0.11871 0.05346 0.87666 0.75894
   4  -2   5   -0.83    1.94   1 0.10154-0.19870 0.99144 0.97962 0.08198-0.02912
  -4  -2  -5    3.52    3.07   1-0.54424-0.32918-0.74123-0.91537-0.39290-0.23179
  -4  -2  -5    0.00    1.62   1-0.79169-0.57408-0.60122-0.77366 0.10838 0.26808
  -4   2  -5    2.59    1.43   1-0.48374-0.18223 0.09970 0.11253 0.86951 0.97679
   4  -2   5   -0.98    2.08   1-0.13613-0.43765-0.41280-0.42133 0.90058 0.79431
   4   2   5    1.05    2.56   1-0.48501-0.69994-0.09830 0.07726 0.86896 0.71000
   4  -2   6   48.87    2.89   1 0.12904-0.20329 0.98635 0.97786 0.10220-0.04954
  -4  -2  -6   43.51    3.11   1-0.51724-0.27026-0.77025-0.94759-0.37304-0.17037
  -4   2  -6   47.01    3.03   1-0.56700-0.23322 0.00256 0.01248 0.82371 0.97234
   4  -2   6   37.10    2.91   1-0.19672-0.53047-0.36645-0.37158 0.90940 0.76192
   4   2   6   45.56    2.73   1-0.49424-0.74184-0.08809 0.09056 0.86484 0.66442
   4  -2   7   10.90    3.06   1 0.15486-0.20932 0.98047 0.97518 0.12119-0.07215
  -4  -2  -7    7.06    2.89   1-0.49953-0.22065-0.78793-0.96845-0.36002-0.11579
  -4  -2  -7    8.74    1.89   1-0.79846-0.51627-0.58315-0.76144 0.14961 0.39199
  -4   2  -7   12.32    2.13   1-0.63113-0.26507-0.08213-0.07514 0.77131 0.96129
   4  -2   7    7.76    2.13   1-0.23803-0.60382-0.33307-0.33500 0.91235 0.72330
   4   2   7   12.97    3.12   1-0.49730-0.77713-0.08467 0.09731 0.86343 0.62176
   4  -2   8   39.03    3.65   1 0.17979-0.21624 0.97375 0.97166 0.13952-0.09543
  -4  -2  -8   31.17    3.60   1-0.48892-0.17813-0.79805-0.98176-0.35221-0.06643
  -4   2  -8   33.26    2.78   1-0.68052-0.28219-0.15606-0.15199 0.71590 0.94724
   4  -2   8   32.95    2.87   1-0.26376-0.66174-0.31154-0.31007 0.91289 0.68260
   4   2   8   32.22    2.57   1-0.49561-0.80767-0.08656 0.09876 0.86421 0.58129
   4  -2   9   14.99    3.05   1 0.20409-0.22379 0.96621 0.96732 0.15739-0.11917
  -4  -2  -9   19.08    2.70   1-0.48372-0.14101-0.80289-0.98978-0.34839-0.02104
  -4  -2  -9   10.80    2.14   1-0.79036-0.44360-0.60421-0.78834 0.10123 0.42629
  -4   2  -9   14.13    2.44   1-0.71859-0.28798-0.22103-0.21987 0.65937 0.93204
   4  -2   9   17.99    2.83   1-0.27867-0.70884-0.29878-0.29392 0.91272 0.64120
   4   2   9   19.04    3.33   1-0.49025-0.83454-0.09252 0.09614 0.86665 0.54248
   4  -2  10   -4.40    2.45   1 0.22791-0.23183 0.95784 0.96214 0.17490-0.14325
  -4  -2 -10   -1.06    2.17   1-0.48269-0.10808-0.80383-0.99391-0.34763 0.02126
  -4  -2 -10    3.54    2.22   1-0.78364-0.40460-0.61742-0.80446 0.06848 0.43489
  -4   2 -10   -1.16    2.11   1-0.74783-0.28495-0.27864-0.28041 0.60257 0.91660
   4  -2  10   -1.02    1.57   1-0.28545-0.74781-0.29291-0.28467 0.91253 0.59977
   4   2  10    0.25    1.93   1-0.48241-0.85829-0.10116 0.09135 0.87008 0.50495
   4  -2  11   -0.92    2.64   1 0.25136-0.24023 0.94862 0.95613 0.19215-0.16762
  -4  -2 -11   -3.74    3.12   1-0.48492-0.07840-0.80178-0.99504-0.34927 0.06118
  -4   2 -11    1.08    2.72   1-0.77003-0.27488-0.33024-0.33491 0.54587 0.90125
   4  -2  11    1.00    2.00   1-0.28593-0.78049-0.29249-0.28086 0.91251 0.55852
   4   2  11    3.30    3.00   1-0.47165-0.87972-0.11286 0.08304 0.87453 0.46816
   4  -2  12   -6.39    4.02   1 0.27452-0.24892 0.93855 0.94926 0.20918-0.19219
  -4  -2 -12   -1.59    3.36   1-0.48973-0.05131-0.79729-0.99374-0.35281 0.09920
  -4   2 -12    1.75    2.14   1-0.78647-0.25904-0.37684-0.38444 0.48932 0.88605
   4  -2  12    0.58    2.55   1-0.28137-0.80812-0.29644-0.28142 0.91265 0.51743
   4   2  12   -0.30    2.72   1-0.45873-0.89899-0.12670 0.07259 0.87949 0.43189
   4  -2  13   -0.54    3.48   1 0.29743-0.25786 0.92760 0.94150 0.22603-0.21695
  -4  -2 -13    3.01    3.45   1-0.49660-0.02627-0.79076-0.99040-0.35786 0.13571
  -4   2 -13    1.15    2.18   1-0.79803-0.23833-0.41929-0.42980 0.43281 0.87089
   4  -2  13   -1.43    2.29   1-0.27264-0.83157-0.30396-0.28555 0.91283 0.47637
   4   2  13   -3.45    3.85   1-0.44385-0.91631-0.14235 0.06033 0.88471 0.39588
   4  -2  14    2.05    3.72   1 0.32014-0.26700 0.91574 0.93285 0.24273-0.24185
  -4  -2 -14    2.81    3.26   1-0.50514-0.00290-0.78244-0.98526-0.36414 0.17099
  -4   2 -14    3.37    2.66   1-0.80533-0.21335-0.45818-0.47162 0.37616 0.85559
   4  -2  14    0.58    2.37   1-0.26032-0.85145-0.31445-0.29265 0.91288 0.43518
   4   2  14   -7.42    5.47   1-0.42717-0.93182-0.15955 0.04652 0.88997 0.35991
   4  -2  15    0.68    2.82   1 0.34268-0.27632 0.90295 0.92326 0.25930-0.26689
  -4  -2 -15   -2.19    3.91   1-0.51504 0.01910-0.77251-0.97851-0.37142 0.20527
   4   2  15   -0.93    3.76   1-0.40877-0.94561-0.17812 0.03133 0.89508 0.32378
   4  -2  16    6.94    3.42   1 0.36506-0.28579 0.88920 0.91270 0.27576-0.29203
  -4  -2 -16   -3.08    4.14   1-0.52605 0.04000-0.76107-0.97026-0.37952 0.23873
   4   2  16    0.52    4.06   1-0.38868-0.95771-0.19793 0.01491 0.89985 0.28732
   4  -2  17   -1.04    5.00   1 0.38731-0.29539 0.87444 0.90114 0.29212-0.31728
  -4  -2 -17    5.08    3.51   1-0.53799 0.05997-0.74818-0.96056-0.38830 0.27151
   4   2  17    5.45    5.92   1-0.36693-0.96814-0.21888-0.00263 0.90413 0.25036
  -4  -4  17   -1.09    5.16   1 0.21656-0.31077 0.96195 0.76599 0.16656-0.56272
   4  -4 -17    0.64    4.58   1-0.57060-0.21218-0.71023-0.88317-0.41228 0.41831
   4   4 -17    3.23    3.59   1-0.80048-0.26582-0.57638-0.37540 0.16432 0.88792
  -4   4  17    1.36    4.04   1-0.60909-0.97333 0.05183 0.22657 0.79139-0.03569
  -4  -4  16   12.92    4.29   1 0.17987-0.31560 0.97373 0.77458 0.13958-0.54810
   4  -4 -16   22.53    4.91   1-0.55976-0.23324-0.72332-0.89307-0.40431 0.38472
   4   4 -16   16.10    4.40   1-0.80479-0.30240-0.55784-0.35394 0.20277 0.88502
  -4   4  16   10.24    3.46   1-0.63406-0.96607 0.08627 0.25768 0.76845-0.01738
  -4  -4  15    4.10    3.87   1 0.14156-0.32206 0.98363 0.78128 0.11141-0.53466
   4  -4 -15    7.04    3.68   1-0.55012-0.25551-0.73456-0.90112-0.39721 0.35025
   4   4 -15   -1.64    3.01   1-0.80757-0.33746-0.53872-0.33191 0.23998 0.88088
  -4   4  15    6.48    3.86   1-0.65763-0.95741 0.12063 0.28871 0.74361-0.00097
  -4  -4  14   12.10    3.26   1 0.10088-0.32981 0.99155 0.78498 0.08149-0.52442
   4  -4 -14   16.32    3.87   1-0.54195-0.27925-0.74380-0.90718-0.39121 0.31470
   4  -4 -14   11.80    3.13   1-0.60816-0.33831-0.71135-0.87263-0.35229 0.35220
   4   4 -14   20.69    3.83   1-0.80893-0.37110-0.51908-0.30934 0.27600 0.87555
  -4   4  14   27.29    4.85   1-0.67963-0.94769 0.15464 0.31889 0.71706 0.01353
  -4  -4  13    0.11    3.03   1 0.05837-0.34056 0.99703 0.78732 0.05023-0.51394
   4  -4 -13    0.86    2.82   1-0.53561-0.30482-0.75079-0.91099-0.38655 0.27780
   4  -4 -13   -0.26    2.98   1-0.61407-0.37650-0.71090-0.86926-0.34281 0.32034
   4   4 -13    1.69    3.65   1-0.80894-0.40338-0.49895-0.28629 0.31088 0.86908
  -4   4  13   -2.96    4.17   1-0.70055-0.93635 0.18913 0.35010 0.68808 0.02580
  -4  -4  12   -3.12    3.62   1 0.01319-0.35398 0.99976 0.78692 0.01701-0.50542
   4  -4 -12    1.95    3.35   1-0.53157-0.33268-0.75518-0.91219-0.38357 0.23922
   4  -4 -12   -0.58    2.19   1-0.61692-0.41162-0.71065-0.86610-0.33820 0.28361
   4   4 -12    3.30    2.97   1-0.80768-0.43439-0.47836-0.26279 0.34468 0.86153
  -4   4  12    4.45    3.94   1-0.72012-0.92366 0.22384 0.38152 0.65675 0.03573
  -4  -4  11    6.62    3.37   1-0.03515-0.37057 0.99921 0.78322-0.01853-0.49923
   4  -4 -11    5.84    2.81   1-0.53044-0.36346-0.75639-0.91021-0.38275 0.19849
   4  -4 -11    2.41    2.37   1-0.61637-0.44335-0.71070-0.86323-0.33908 0.24138
   4   4 -11    0.32    2.33   1-0.80521-0.46420-0.45737-0.23888 0.37740 0.85290
  -4   4  11    4.40    2.92   1-0.73829-0.90959 0.25887 0.41326 0.62281 0.04306
  -4  -4  10   29.12    3.69   1-0.08730-0.39096 0.99455 0.77543-0.05688-0.49583
   4  -4 -10   22.15    3.25   1-0.53307-0.39800-0.75355-0.90419-0.38468 0.15499
   4  -4 -10   23.17    3.23   1-0.61193-0.47119-0.71107-0.86068-0.34627 0.19285
   4   4 -10   19.06    3.64   1-0.80158-0.49285-0.43600-0.21459 0.40908 0.84323
  -4   4  10   21.60    4.25   1-0.75500-0.89404 0.29434 0.44545 0.58593 0.04744
  -4  -4   9   -3.97    2.66   1-0.14398-0.41588 0.98465 0.76239-0.09856-0.49577
   4  -4  -9    0.52    2.07   1-0.54061-0.43745-0.74529-0.89274-0.39022 0.10790
   4  -4  -9    1.06    2.59   1-0.60283-0.49437-0.71167-0.85837-0.36069 0.13708
   4   4  -9   -1.77    2.77   1-0.79686-0.52040-0.41430-0.18998 0.43972 0.83251
  -4  -4   9    1.74    1.77   1-0.64323-0.92221 0.09941-0.12146 0.75918 0.36710
  -4   4   9   -2.21    2.79   1-0.77010-0.87689 0.33041 0.47823 0.54567 0.04843
  -4  -4   8   27.69    2.81   1-0.20590-0.44621 0.96790 0.74254-0.14410-0.49951
   4  -4  -8   29.37    3.44   1-0.55463-0.48338-0.72935-0.87361-0.40053 0.05602
   4  -4  -8   25.04    2.41   1-0.58800-0.51182-0.71220-0.85598-0.38341 0.07302
   4   4  -8   23.83    3.37   1-0.79109-0.54690-0.39232-0.16508 0.46930 0.82075
  -4  -4   8   23.14    2.20   1-0.68374-0.93049 0.16123-0.06298 0.71168 0.36085
  -4   4   8   20.41    2.79   1-0.78338-0.85792 0.36723 0.51176 0.50143 0.04546
  -4  -4   7    2.50    1.93   1-0.27425-0.48279 0.94181 0.71331-0.19435-0.50803
   4  -4  -7   -1.54    1.89   1-0.57731-0.53797-0.70188-0.84295-0.41721-0.00220
   4  -4  -7   -2.34    1.74   1-0.56598-0.52207-0.71204-0.85289-0.41552-0.00042
   4   4  -7    0.55    2.39   1-0.78433-0.57242-0.37011-0.13995 0.49783 0.80792
  -4  -4   7   -0.04    1.56   1-0.72878-0.94328 0.24015 0.01226 0.64124 0.33175
  -4   4   7   -0.89    2.67   1-0.79452-0.83680 0.40495 0.54619 0.45248 0.03776
  -4  -4   6   16.89    2.60   1-0.34964-0.52641 0.90296 0.67132-0.24980-0.52174
   4  -4  -6   14.97    2.29   1-0.61147-0.60403-0.65608-0.79397-0.44233-0.06888
   4  -4  -6   18.74    2.60   1-0.53484-0.52321-0.71009-0.84803-0.45793-0.08418
   4   4  -6   14.31    2.84   1-0.77664-0.59700-0.34775-0.11467 0.52524 0.79399
  -4  -4   6   13.44    1.90   1-0.77766-0.95990 0.35058 0.11940 0.52185 0.25362
  -4   4   6   11.49    3.39   1-0.80304-0.81332 0.44383 0.58131 0.39766 0.02405
  -4  -4   5    2.06    2.05   1-0.43231-0.57731 0.84654 0.61175-0.31059-0.54079
   4  -4  -5   -1.03    2.19   1-0.66004-0.68452-0.57948-0.71418-0.47805-0.14616
   4  -4  -5    0.54    2.07   1-0.49213-0.51280-0.70459-0.83967-0.51122-0.17881
   4   4  -5    1.82    2.37   1-0.76810-0.62074-0.32534-0.08934 0.55150 0.77890
  -4   4   5    0.87    2.33   1-0.80813-0.78613 0.48379 0.61805 0.33593 0.00358
  -4  -4   5    0.36    1.58   1-0.80910-0.95917 0.50983 0.27509 0.29225 0.06566
  -4  -4   4  165.49    5.31   1-0.52038-0.63409 0.76701 0.52927-0.37535-0.56373
   4  -4  -4  156.12    4.81   1-0.72315-0.77953-0.44943-0.58095-0.52445-0.23412
   4  -4  -4  157.99    4.83   1-0.43567-0.48860-0.69307-0.82524-0.57431-0.28325
   4   4  -4  162.79    4.98   1-0.75882-0.64373-0.30302-0.06410 0.57651 0.76256
  -4   4   4  161.02    5.56   1-0.80868-0.75438 0.52491 0.65593 0.26552-0.02557
  -4  -4   4  158.99    5.12   1-0.72105-0.83883 0.68014 0.44217-0.13221-0.31755
  -4  -4   3   29.78    2.88   1-0.61143-0.69330 0.65612 0.41519-0.44231-0.58901
   4  -4  -3   23.88    2.36   1-0.78734-0.87563-0.23082-0.35916-0.57166-0.32289
   4  -4  -3   27.44    3.07   1-0.36334-0.44855-0.67239-0.80165-0.64487-0.39515
   4   4  -3   27.28    2.67   1-0.74892-0.66611-0.28099-0.03915 0.60012 0.74482
   4   4  -3   23.62    2.00   1 0.37713 0.46355-0.68717-0.44657 0.62093 0.76530
  -4   4   3   25.87    2.58   1-0.80290-0.71632 0.56689 0.69468 0.18431-0.06552
  -4  -4   2    0.17    1.96   1-0.69614-0.74656 0.51064 0.26659-0.50459-0.60956
   4  -4  -2    1.15    1.77   1-0.80564-0.92522 0.09263-0.03341-0.58511-0.37795
   4  -4  -2    0.39    2.24   1-0.27465-0.39212-0.63939-0.76573-0.71815-0.50978
   4   4  -2   -0.71    1.74   1-0.73865-0.68811-0.25958-0.01482 0.62210 0.72545
   4   4  -2    1.66    1.62   1 0.01599 0.06993-0.51636-0.27239 0.85622 0.95963
  -4   4   2   -0.27    2.06   1-0.78813-0.66926 0.60891 0.73347 0.08980-0.11877
   4  -4  -1   21.03    2.47   1-0.72174-0.87348 0.45290 0.32973-0.52342-0.35817
  -4  -4   1   17.43    2.67   1-0.76353-0.78203 0.33155 0.08427-0.55415-0.61750
   4  -4  -1   20.63    3.03   1-0.17064-0.32042-0.59144-0.71514-0.78807-0.62120
   4   4  -1   24.91    2.66   1-0.72833-0.71007-0.23929 0.00838 0.64207 0.70407
   4   4  -1   18.35    2.30   1-0.22737-0.20566-0.34182-0.09446 0.91184 0.97405
  -4   4   1   20.68    2.71   1-0.76045-0.60929 0.64906 0.77039-0.02044-0.18776
   4  -4   0  104.73    3.79   1-0.56877-0.75256 0.71247 0.59239-0.41093-0.28761
  -4  -4   0  106.54    3.98   1-0.80180-0.78862 0.13433-0.11619-0.58229-0.60379
   4  -4   0  109.45    4.18   1-0.05794-0.23996-0.52941-0.65019-0.84638-0.72087
   4   4   0   99.00    4.00   1-0.71860-0.73261-0.22104 0.02954 0.65935 0.68000
   4   4   0  106.39    3.88   1-0.36781-0.37854-0.21804 0.03271 0.90397 0.92500
  -4   4   0  105.56    4.13   1-0.71467-0.53122 0.68368 0.80177-0.14772-0.27379
   4  -4   1   69.52    3.35   1-0.42269-0.63839 0.85393 0.73694-0.30352-0.22219
  -4  -4  -1   71.84    3.58   1-0.80772-0.76255-0.05843-0.31217-0.58665-0.56661
   4  -4   1   75.14    3.76   1 0.05766-0.15653-0.45548-0.57337-0.88837-0.80419
   4   4   1   70.93    3.30   1-0.71061-0.75690-0.20665 0.04686 0.67254 0.65184
   4   4   1   68.97    3.57   1-0.44887-0.49179-0.13710 0.11703 0.88301 0.86280
  -4   4  -1   64.69    3.20   1-0.64533-0.42959 0.70681 0.82167-0.28976-0.37457
   4  -4   2   16.84    2.16   1-0.30790-0.55537 0.92584 0.81199-0.21910-0.17951
  -4  -4  -2   17.19    2.93   1-0.78825-0.71174-0.22601-0.48293-0.57233-0.51009
   4  -4   2   10.56    2.81   1 0.16986-0.07656-0.37376-0.48877-0.91183-0.86904
   4   4   2   14.82    2.07   1-0.70695-0.78551-0.20019 0.05623 0.67833 0.61628
   4   4   2   12.60    2.35   1-0.49620-0.57174-0.08590 0.17165 0.86394 0.80227
  -4   4  -2   13.95    2.22   1-0.54993-0.30191 0.71127 0.82290-0.43778-0.48133
   4  -4   3   43.51    3.16   1-0.21921-0.49845 0.96346 0.85275-0.15389-0.15603
  -4  -4  -3   39.38    2.95   1-0.75507-0.64665-0.36004-0.62015-0.54793-0.44413
   4  -4   3   45.40    3.38   1 0.27353-0.00511-0.28897-0.40109-0.91742-0.91602
   4   4   3   42.95    3.24   1-0.71464-0.82547-0.21385 0.04550 0.66599 0.56260
   4   4   3   39.58    2.82   1-0.52405-0.63182-0.05418 0.20671 0.84995 0.74703
  -4   4  -3   37.55    2.68   1-0.43364-0.15333 0.69257 0.80097-0.57644-0.57872
   4  -4   4    2.96    2.50   1-0.14873-0.45972 0.98359 0.87597-0.10206-0.14605
  -4  -4  -4    3.74    2.24   1-0.71828-0.57795-0.46124-0.72453-0.52088-0.37552
   4  -4   4   10.33    3.14   1 0.36550 0.05462-0.20536-0.31450-0.90787-0.94768
   4   4   4    5.58    1.42   1-0.76681-0.90992-0.32213-0.05985 0.55517 0.41042
   4  -4   4    8.16    2.20   1 0.31457 0.00192-0.66603-0.77002 0.67634 0.63801
   4   4   4    6.11    2.83   1-0.53980-0.67980-0.03565 0.22857 0.84103 0.69685
   4  -4   5   70.53    3.59   1-0.09027-0.43302 0.99416 0.88967-0.05907-0.14480
  -4  -4  -5   73.65    3.58   1-0.68396-0.51172-0.53528-0.80176-0.49564-0.30872
  -4   4  -5   68.21    3.35   1-0.44814-0.10459 0.13787 0.24338 0.88326 0.96427
   4  -4   5   68.04    3.24   1 0.20088-0.14404-0.61789-0.71843 0.76016 0.68051
   4   4   5   63.39    3.15   1-0.54757-0.71980-0.02635 0.24121 0.83633 0.65091
   4  -4   6   53.61    3.18   1-0.04012-0.41462 0.99894 0.89759-0.02219-0.14967
  -4  -4  -6   59.06    3.99   1-0.65478-0.45063-0.58856-0.85822-0.47418-0.24570
  -4   4  -6   57.12    3.27   1-0.51686-0.14104 0.06249 0.16508 0.85378 0.97614
   4  -4   6   57.40    3.17   1 0.10582-0.27139-0.56909-0.66622 0.81543 0.69461
   4   4   6   55.15    3.48   1-0.54976-0.75422-0.02370 0.24719 0.83498 0.60830
   4  -4   7   11.50    2.16   1 0.00418-0.40207 0.99993 0.90172 0.01039-0.15883
  -4  -4  -7   14.14    3.15   1-0.63143-0.39538-0.62643-0.89928-0.45701-0.18698
  -4   4  -7    9.30    2.95   1-0.57526-0.16717-0.00779 0.09188 0.81792 0.98163
   4  -4   7   14.96    2.31   1 0.03056-0.37870-0.52533-0.61916 0.85034 0.68790
   4   4   7    8.58    2.25   1-0.54784-0.78452-0.02603 0.24819 0.83617 0.56825
   4  -4   8   15.41    2.33   1 0.04426-0.39376 0.99822 0.90314 0.03986-0.17110
  -4  -4  -8   21.08    3.09   1-0.61367-0.34571-0.65292-0.92895-0.44395-0.13236
  -4   4  -8   13.95    2.17   1-0.62458-0.18421-0.07298 0.02376 0.77754 0.98259
   4  -4   8   13.45    2.41   1-0.02426-0.46576-0.49070-0.58113 0.87098 0.66734
   4   4   8   21.54    2.94   1-0.54272-0.81163-0.03218 0.24538 0.83929 0.53012
   4  -4   9   15.29    3.75   1 0.08119-0.38859 0.99444 0.90250 0.06701-0.18569
  -4  -4  -9   23.76    3.69   1-0.60086-0.30099-0.67092-0.95014-0.43453-0.08138
  -4   4  -9   25.61    2.94   1-0.66601-0.19337-0.13334-0.03951 0.73392 0.98032
   4  -4   9   22.34    2.49   1-0.06290-0.53663-0.46489-0.55192 0.88312 0.63827
   4   4   9   21.86    3.76   1-0.53501-0.83615-0.04134 0.23955 0.84383 0.49340
   4  -4  10   20.28    3.07   1 0.11571-0.38582 0.98897 0.90017 0.09240-0.20205
  -4  -4 -10   22.53    3.72   1-0.59231-0.26053-0.68247-0.96488-0.42824-0.03353
  -4   4 -10   18.86    3.17   1-0.70063-0.19571-0.18928-0.09836 0.68795 0.97571
   4  -4  10   17.91    2.45   1-0.08856-0.59452-0.44712-0.53075 0.89007 0.60401
   4   4  10   16.91    2.88   1-0.52511-0.85849-0.05294 0.23128 0.84938 0.45770
   4  -4  11    5.86    3.51   1 0.14877-0.38517 0.98195 0.89678 0.11671-0.21776
  -4  -4 -11    1.45    2.69   1-0.58735-0.22367-0.68900-0.97459-0.42460 0.01166
  -4   4 -11   -1.61    2.05   1-0.72933-0.19214-0.24120-0.15321 0.64022 0.96933
   4  -4  11    1.01    2.11   1-0.10388-0.64208-0.43627-0.51649 0.89379 0.56653
   4   4  11    2.18    3.94   1-0.51331-0.87891-0.06657 0.22099 0.85561 0.42269
   4  -4  12   37.00    4.00   1 0.17994-0.38586 0.97371 0.89174 0.13963-0.23645
  -4  -4 -12   35.66    3.38   1-0.58542-0.18982-0.69151-0.98029-0.42318 0.05464
  -4   4 -12   38.83    3.77   1-0.75284-0.18337-0.28954-0.20446 0.59108 0.96154
   4  -4  12   26.79    2.81   1-0.11090-0.68134-0.43122-0.50805 0.89539 0.52692
   4   4  12   38.32    4.19   1-0.49977-0.89760-0.08191 0.20899 0.86227 0.38809
   4  -4  13   11.16    3.18   1 0.20989-0.38775 0.96426 0.88549 0.16166-0.25602
  -4  -4 -13    2.07    2.81   1-0.58602-0.15852-0.69073-0.98270-0.42362 0.09576
  -4   4 -13    7.22    2.91   1-0.77175-0.17001-0.33466-0.25251 0.54073 0.95254
   4   4  13    9.09    3.03   1-0.48463-0.91469-0.09872 0.19551 0.86912 0.35370
   4  -4  14   59.08    3.93   1 0.23886-0.39064 0.95366 0.87808 0.18296-0.27633
  -4  -4 -14   56.69    3.96   1-0.58875-0.12934-0.68717-0.98232-0.42562 0.13531
  -4   4 -14   54.27    3.58   1-0.78649-0.15247-0.37690-0.29766 0.48925 0.94241
   4   4  14   62.37    4.92   1-0.46853-0.92994-0.11622 0.18198 0.87576 0.31951
   4  -4  15    0.08    3.34   1 0.26700-0.39435 0.94193 0.86955 0.20365-0.29724
  -4  -4 -15   -5.18    4.38   1-0.59327-0.10195-0.68119-0.97953-0.42895 0.17355
  -4   4 -15    6.77    3.93   1-0.79739-0.13109-0.41652-0.34020 0.43666 0.93116
   4   4  15    5.18    3.32   1-0.45043-0.94402-0.13547 0.16612 0.88247 0.28499
   4  -4  16   18.14    4.06   1 0.29445-0.39876 0.92908 0.85990 0.22383-0.31866
  -4  -4 -16   26.99    3.99   1-0.59929-0.07606-0.67307-0.97459-0.43338 0.21067
   4   4  16   11.79    5.59   1-0.43085-0.95664-0.15579 0.14920 0.88887 0.25015
  -4  -6  16    6.12    5.60   1 0.10977-0.42694 0.99005 0.69708 0.08803-0.57601
   4   6 -16    6.49    5.11   1-0.80904-0.26462-0.51494-0.21837 0.28332 0.93930
  -4   6  16   -4.17    3.47   1-0.64209-0.93096 0.09777 0.36142 0.76036-0.05173
  -4  -6  15   12.33    4.15   1 0.06802-0.43693 0.99603 0.69993 0.05733-0.56496
   4  -6 -15    2.34    3.26   1-0.64281-0.39103-0.60844-0.86734-0.46538 0.30790
   4   6 -15    2.94    4.70   1-0.80871-0.29656-0.49318-0.19369 0.32053 0.93516
  -4   6  15   11.71    5.63   1-0.66357-0.92021 0.12961 0.38993 0.73679-0.03405
  -4  -6  14    3.23    4.43   1 0.02439-0.44881 0.99938 0.70014 0.02524-0.55530
   4  -6 -14    0.82    3.69   1-0.64135-0.42148-0.61079-0.86650-0.46431 0.26741
   4   6 -14   -1.26    3.18   1-0.80693-0.32705-0.47084-0.16844 0.35659 0.92987
  -4   6  14    0.62    3.70   1-0.68353-0.90853 0.16089 0.41742 0.71196-0.01786
  -4  -6  13   21.22    3.84   1-0.02140-0.46284 0.99973 0.69735-0.00842-0.54723
   4  -6 -13   14.14    3.35   1-0.64222-0.45426-0.60940-0.86193-0.46494 0.22521
   4  -6 -13   13.12    3.50   1-0.46646-0.27089-0.69990-0.95108-0.54087 0.14849
   4   6 -13   27.64    3.75   1-0.80374-0.35614-0.44796-0.14263 0.39155 0.92347
  -4   6  13   17.15    4.75   1-0.70245-0.89520 0.19239 0.44564 0.68523-0.00334
  -4  -6  12   -0.30    2.69   1-0.06964-0.47932 0.99660 0.69109-0.04389-0.54096
   4  -6 -12    4.33    3.89   1-0.64584-0.48979-0.60350-0.85284-0.46761 0.18099
   4  -6 -12    3.13    2.96   1-0.46449-0.30119-0.69950-0.94777-0.54308 0.10494
   4   6 -12   -2.14    4.79   1-0.79922-0.38389-0.42454-0.11630 0.42544 0.91602
  -4   6  12   -2.94    4.10   1-0.72010-0.88059 0.22381 0.47377 0.65678 0.00946
  -4  -6  11    2.79    2.91   1-0.12064-0.49856 0.98935 0.68070-0.08140-0.53672
   4  -6 -11    4.54    2.72   1-0.65275-0.52860-0.59201-0.83816-0.47268 0.13436
   4  -6 -11    0.27    2.60   1-0.45775-0.32672-0.69810-0.94345-0.55055 0.05611
   4   6 -11   -0.26    3.06   1-0.79338-0.41032-0.40061-0.08945 0.45831 0.90754
  -4   6  11    3.88    2.44   1-0.73646-0.86470 0.25518 0.50186 0.62649 0.02043
  -4  -6  10    2.62    3.17   1-0.17475-0.52091 0.97712 0.66533-0.12119-0.53476
   4  -6 -10    0.88    3.25   1-0.66350-0.57127-0.57339-0.81635-0.48060 0.08489
   4  -6 -10    3.87    2.59   1-0.44572-0.34696-0.69544-0.93787-0.56364 0.00168
   4   6 -10    3.59    2.78   1-0.78626-0.43549-0.37618-0.06209 0.49017 0.89804
  -4   6  10    6.58    3.93   1-0.75150-0.84749 0.28659 0.52998 0.59421 0.02941
[truncated: 1,218,966 more chars]
