# Supplementary material
Source: MDPI journal article supplement (https://www.mdpi.com/2073-4352/12/10/1443)
Supplement: s1 [file s1 › 3.cif]

 
data_shelx
 
_audit_creation_method            'SHELXL-2018/3'
_shelx_SHELXL_version_number      '2018/3'
_chemical_name_systematic         ?
_chemical_name_common             ?
_chemical_melting_point           ?
_chemical_formula_moiety          ?
_chemical_formula_sum
 'C4 H14 F5 Fe N2 O' 
_chemical_formula_weight          257.02

loop_
 _atom_type_symbol
 _atom_type_description
 _atom_type_scat_dispersion_real
 _atom_type_scat_dispersion_imag
 _atom_type_scat_source
 'Fe'  'Fe'   0.3463   0.8444
 'International Tables Vol C Tables 4.2.6.8 and 6.1.1.4'
 'F'  'F'   0.0171   0.0103
 'International Tables Vol C Tables 4.2.6.8 and 6.1.1.4'
 'C'  'C'   0.0033   0.0016
 'International Tables Vol C Tables 4.2.6.8 and 6.1.1.4'
 'N'  'N'   0.0061   0.0033
 'International Tables Vol C Tables 4.2.6.8 and 6.1.1.4'
 'O'  'O'   0.0106   0.0060
 'International Tables Vol C Tables 4.2.6.8 and 6.1.1.4'
 'H'  'H'   0.0000   0.0000
 'International Tables Vol C Tables 4.2.6.8 and 6.1.1.4'
 
_space_group_crystal_system       monoclinic
_space_group_IT_number            14
_space_group_name_H-M_alt         'P 21/n'
_space_group_name_Hall            '-P 2yn'
 
_shelx_space_group_comment
;
The symmetry employed for this shelxl refinement is uniquely defined
by the following loop, which should always be used as a source of
symmetry information in preference to the above space-group names.
They are only intended as comments.
;
 
loop_
 _space_group_symop_operation_xyz
 'x, y, z'
 '-x+1/2, y+1/2, -z+1/2'
 '-x, -y, -z'
 'x-1/2, -y-1/2, z-1/2'
 
_cell_length_a                    11.4695(8)
_cell_length_b                    5.8774(4)
_cell_length_c                    13.6090(10)
_cell_angle_alpha                 90
_cell_angle_beta                  91.553(6)
_cell_angle_gamma                 90
_cell_volume                      917.06(11)
_cell_formula_units_Z             4
_cell_measurement_temperature     173(2)
_cell_measurement_reflns_used           986
_cell_measurement_theta_min             1.5
_cell_measurement_theta_max             27.5
 
_exptl_crystal_description              'chip'
_exptl_crystal_colour                   'colourless'
_exptl_crystal_density_meas       ?
_exptl_crystal_density_method           'not measured'
_exptl_crystal_density_diffrn     1.862          
_exptl_crystal_F_000              524
_exptl_transmission_factor_min    ?
_exptl_transmission_factor_max    ?
_exptl_crystal_size_max                 0.29
_exptl_crystal_size_mid                 0.11
_exptl_crystal_size_min                 0.10
_exptl_absorpt_coefficient_mu     1.690
_shelx_estimated_absorpt_T_min    ?
_shelx_estimated_absorpt_T_max    ?
_exptl_absorpt_correction_type          'Multi-scan'
_exptl_absorpt_correction_T_min   0.711
_exptl_absorpt_correction_T_max   1.000
_exptl_absorpt_process_details    'REQAB (Rigaku, 1998)'
_exptl_absorpt_special_details    ?
_diffrn_ambient_temperature       173(2)
_diffrn_radiation_wavelength      0.71075
_diffrn_radiation_type            MoK\a
_diffrn_source                    'Sealed Tube'
_diffrn_measurement_device
;
SCXMini: Fixed Chi 2 circle
;
_diffrn_measurement_device_type
;
Rigaku Mercury2 (2x2 bin mode)
;
_diffrn_measurement_method        'profile data from \w-scans'
_diffrn_detector_area_resol_mean  13.6612
_diffrn_reflns_number             7243
_diffrn_reflns_av_unetI/netI      0.0270
_diffrn_reflns_av_R_equivalents   0.0403
_diffrn_reflns_limit_h_min        -13
_diffrn_reflns_limit_h_max        13
_diffrn_reflns_limit_k_min        -6
_diffrn_reflns_limit_k_max        6
_diffrn_reflns_limit_l_min        -16
_diffrn_reflns_limit_l_max        16
_diffrn_reflns_theta_min          3.554
_diffrn_reflns_theta_max          24.999
_diffrn_reflns_theta_full         24.999
_diffrn_measured_fraction_theta_max   0.987
_diffrn_measured_fraction_theta_full  0.987
_diffrn_reflns_Laue_measured_fraction_max    0.987
_diffrn_reflns_Laue_measured_fraction_full   0.987
_diffrn_reflns_point_group_measured_fraction_max   0.987
_diffrn_reflns_point_group_measured_fraction_full  0.987
_reflns_number_total              1588
_reflns_number_gt                 1454
_reflns_threshold_expression      'I > 2\s(I)'
_reflns_Friedel_coverage          0.000
_reflns_Friedel_fraction_max      .
_reflns_Friedel_fraction_full     .
 
_reflns_special_details
;
 Reflections were merged by SHELXL according to the crystal
 class for the calculation of statistics and refinement.
 
 _reflns_Friedel_fraction is defined as the number of unique
 Friedel pairs measured divided by the number that would be
 possible theoretically, ignoring centric projections and
 systematic absences.
;
 
_computing_data_collection        
;
CrystalClear-SM Expert 2.1 b45 (Rigaku, 2015)
;
_computing_cell_refinement        
;
CrystalClear-SM Expert 2.1 b45 (Rigaku, 2015)
;
_computing_data_reduction         
;
CrystalClear-SM Expert 2.1 b45 (Rigaku, 2015)
;
_computing_structure_solution          'SHELXT 2018/2 (Sheldrick, 2018)'
_computing_structure_refinement 'SHELXL-2018/3 (Sheldrick, 2018)'
_computing_molecular_graphics          'Ortep for Windows (Farrugia, 2012)'
_computing_publication_material   'WinGX publication routines (Farrugia, 2012)'
_refine_special_details           ?
_refine_ls_structure_factor_coef  Fsqd
_refine_ls_matrix_type            full
_refine_ls_weighting_scheme       calc
_refine_ls_weighting_details
'w=1/[\s^2^(Fo^2^)+(0.0523P)^2^+0.4531P] where P=(Fo^2^+2Fc^2^)/3'
_atom_sites_solution_primary           'dual - dual-space method e.g. SHELXD'
_atom_sites_solution_secondary         'dual - dual-space method e.g. SHELXD'
_atom_sites_solution_hydrogens    mixed
_refine_ls_hydrogen_treatment     constr
_refine_ls_extinction_method      none
_refine_ls_extinction_coef        .
_refine_ls_number_reflns          1588
_refine_ls_number_parameters      118
_refine_ls_number_restraints      0
_refine_ls_R_factor_all           0.0275
_refine_ls_R_factor_gt            0.0250
_refine_ls_wR_factor_ref          0.0769
_refine_ls_wR_factor_gt           0.0756
_refine_ls_goodness_of_fit_ref    1.045
_refine_ls_restrained_S_all       1.045
_refine_ls_shift/su_max           0.001
_refine_ls_shift/su_mean          0.000
 
loop_
 _atom_site_label
 _atom_site_type_symbol
 _atom_site_fract_x
 _atom_site_fract_y
 _atom_site_fract_z
 _atom_site_U_iso_or_equiv
 _atom_site_adp_type
 _atom_site_occupancy
 _atom_site_site_symmetry_order  
 _atom_site_calc_flag
 _atom_site_refinement_flags_posn
 _atom_site_refinement_flags_adp
 _atom_site_refinement_flags_occupancy
 _atom_site_disorder_assembly
 _atom_site_disorder_group
Fe1 Fe 0.36336(2) 0.58180(4) 0.74671(2) 0.00912(14) Uani 1 1 d . . . . .
F1 F 0.34475(11) 0.5171(2) 0.60992(8) 0.0165(3) Uani 1 1 d . . . . .
F2 F 0.48784(10) 0.3658(2) 0.76017(9) 0.0182(3) Uani 1 1 d . . . . .
F3 F 0.36531(11) 0.6393(2) 0.88400(9) 0.0177(3) Uani 1 1 d . . . . .
F4 F 0.24067(11) 0.8165(2) 0.72895(9) 0.0208(3) Uani 1 1 d . . . . .
F5 F 0.47440(10) 0.8150(2) 0.72347(9) 0.0189(3) Uani 1 1 d . . . . .
N1 N 0.44098(17) 0.1154(3) 0.57677(13) 0.0178(4) Uani 1 1 d . . . . .
H1A H 0.407351 0.239700 0.600362 0.021 Uiso 1 1 calc R U . . .
H1B H 0.436771 0.006576 0.622010 0.021 Uiso 1 1 calc R U . . .
N2 N 0.45426(17) 1.0618(3) 0.90574(13) 0.0198(4) Uani 1 1 d . . . . .
H2A H 0.443664 1.162816 0.857601 0.024 Uiso 1 1 calc R U . . .
H2B H 0.419908 0.932542 0.886961 0.024 Uiso 1 1 calc R U . . .
C1 C 0.5653(2) 0.1646(4) 0.55782(16) 0.0209(5) Uani 1 1 d . . . . .
H1C H 0.605301 0.206314 0.618878 0.025 Uiso 1 1 calc R U . . .
H1D H 0.570390 0.291849 0.512767 0.025 Uiso 1 1 calc R U . . .
C2 C 0.3767(2) 0.0413(4) 0.48570(17) 0.0216(5) Uani 1 1 d . . . . .
H2C H 0.375383 0.164377 0.438180 0.026 Uiso 1 1 calc R U . . .
H2D H 0.296789 0.004626 0.501016 0.026 Uiso 1 1 calc R U . . .
C3 C 0.5810(2) 1.0212(4) 0.92178(17) 0.0236(5) Uani 1 1 d . . . . .
H3A H 0.619725 1.163557 0.937978 0.028 Uiso 1 1 calc R U . . .
H3B H 0.613888 0.962467 0.861962 0.028 Uiso 1 1 calc R U . . .
C4 C 0.3988(2) 1.1471(4) 0.99570(17) 0.0227(5) Uani 1 1 d . . . . .
H4A H 0.315765 1.167004 0.983311 0.027 Uiso 1 1 calc R U . . .
H4B H 0.431906 1.293419 1.014016 0.027 Uiso 1 1 calc R U . . .
O1S O 0.7135(2) 0.5306(6) 0.7692(2) 0.0815(9) Uani 1 1 d . . . . .
H1S H 0.644511 0.493630 0.768954 0.098 Uiso 1 1 d R U . . .
H1Q H 0.713549 0.692709 0.735728 0.098 Uiso 1 1 d R U . . .
 
loop_
 _atom_site_aniso_label
 _atom_site_aniso_U_11
 _atom_site_aniso_U_22
 _atom_site_aniso_U_33
 _atom_site_aniso_U_23
 _atom_site_aniso_U_13
 _atom_site_aniso_U_12
Fe1 0.0100(2) 0.0073(2) 0.0100(2) 0.00028(9) 0.00078(12) 0.00008(10)
F1 0.0230(7) 0.0157(6) 0.0108(6) -0.0004(5) -0.0002(5) 0.0039(5)
F2 0.0160(6) 0.0179(6) 0.0207(6) 0.0034(5) 0.0020(5) 0.0060(5)
F3 0.0244(7) 0.0169(6) 0.0116(6) -0.0011(5) 0.0001(5) -0.0041(5)
F4 0.0223(7) 0.0178(6) 0.0222(7) -0.0013(5) 0.0002(5) 0.0109(5)
F5 0.0198(6) 0.0172(7) 0.0197(6) 0.0035(5) 0.0009(5) -0.0082(5)
N1 0.0261(11) 0.0131(9) 0.0145(9) -0.0012(7) 0.0073(7) 0.0035(7)
N2 0.0297(11) 0.0150(9) 0.0143(9) 0.0017(7) -0.0083(8) -0.0026(7)
C1 0.0254(12) 0.0181(11) 0.0193(11) -0.0049(9) 0.0040(9) -0.0033(9)
C2 0.0191(11) 0.0234(11) 0.0224(12) -0.0024(9) 0.0022(9) 0.0025(9)
C3 0.0238(12) 0.0267(12) 0.0207(12) -0.0040(10) 0.0062(9) -0.0050(10)
C4 0.0203(12) 0.0201(11) 0.0274(13) -0.0065(10) -0.0054(9) 0.0045(9)
O1S 0.0213(12) 0.124(2) 0.099(2) -0.027(2) 0.0007(13) -0.0030(14)
 
_geom_special_details
;
 All esds (except the esd in the dihedral angle between two l.s. planes)
 are estimated using the full covariance matrix.  The cell esds are taken
 into account individually in the estimation of esds in distances, angles
 and torsion angles; correlations between esds in cell parameters are only
 used when they are defined by crystal symmetry.  An approximate (isotropic)
 treatment of cell esds is used for estimating esds involving l.s. planes.
;
 
loop_
 _geom_bond_atom_site_label_1
 _geom_bond_atom_site_label_2
 _geom_bond_distance
 _geom_bond_site_symmetry_2
 _geom_bond_publ_flag
Fe1 F3 1.8983(12) . ?
Fe1 F5 1.9033(12) . ?
Fe1 F1 1.9063(12) . ?
Fe1 F2 1.9156(12) . ?
Fe1 F4 1.9806(12) . ?
Fe1 F4 1.9966(12) 2_546 ?
N1 C1 1.484(3) . ?
N1 C2 1.490(3) . ?
N1 H1A 0.8900 . ?
N1 H1B 0.8900 . ?
N2 C4 1.482(3) . ?
N2 C3 1.483(3) . ?
N2 H2A 0.8900 . ?
N2 H2B 0.8900 . ?
C1 C2 1.510(3) 3_656 ?
C1 H1C 0.9700 . ?
C1 H1D 0.9700 . ?
C2 H2C 0.9700 . ?
C2 H2D 0.9700 . ?
C3 C4 1.510(3) 3_677 ?
C3 H3A 0.9700 . ?
C3 H3B 0.9700 . ?
C4 H4A 0.9700 . ?
C4 H4B 0.9700 . ?
O1S H1S 0.8207 . ?
O1S H1Q 1.0558 . ?
 
loop_
 _geom_angle_atom_site_label_1
 _geom_angle_atom_site_label_2
 _geom_angle_atom_site_label_3
 _geom_angle
 _geom_angle_site_symmetry_1
 _geom_angle_site_symmetry_3
 _geom_angle_publ_flag
F3 Fe1 F5 92.59(5) . . ?
F3 Fe1 F1 174.10(5) . . ?
F5 Fe1 F1 92.24(5) . . ?
F3 Fe1 F2 92.01(5) . . ?
F5 Fe1 F2 89.59(6) . . ?
F1 Fe1 F2 91.41(5) . . ?
F3 Fe1 F4 89.17(5) . . ?
F5 Fe1 F4 87.39(5) . . ?
F1 Fe1 F4 87.67(5) . . ?
F2 Fe1 F4 176.81(5) . . ?
F3 Fe1 F4 88.10(5) . 2_546 ?
F5 Fe1 F4 174.62(5) . 2_546 ?
F1 Fe1 F4 87.40(5) . 2_546 ?
F2 Fe1 F4 85.05(5) . 2_546 ?
F4 Fe1 F4 97.953(16) . 2_546 ?
Fe1 F4 Fe1 161.71(7) . 2_556 ?
C1 N1 C2 111.60(17) . . ?
C1 N1 H1A 109.3 . . ?
C2 N1 H1A 109.3 . . ?
C1 N1 H1B 109.3 . . ?
C2 N1 H1B 109.3 . . ?
H1A N1 H1B 108.0 . . ?
C4 N2 C3 111.93(17) . . ?
C4 N2 H2A 109.2 . . ?
C3 N2 H2A 109.2 . . ?
C4 N2 H2B 109.2 . . ?
C3 N2 H2B 109.2 . . ?
H2A N2 H2B 107.9 . . ?
N1 C1 C2 110.35(18) . 3_656 ?
N1 C1 H1C 109.6 . . ?
C2 C1 H1C 109.6 3_656 . ?
N1 C1 H1D 109.6 . . ?
C2 C1 H1D 109.6 3_656 . ?
H1C C1 H1D 108.1 . . ?
N1 C2 C1 110.32(19) . 3_656 ?
N1 C2 H2C 109.6 . . ?
C1 C2 H2C 109.6 3_656 . ?
N1 C2 H2D 109.6 . . ?
C1 C2 H2D 109.6 3_656 . ?
H2C C2 H2D 108.1 . . ?
N2 C3 C4 110.18(18) . 3_677 ?
N2 C3 H3A 109.6 . . ?
C4 C3 H3A 109.6 3_677 . ?
N2 C3 H3B 109.6 . . ?
C4 C3 H3B 109.6 3_677 . ?
H3A C3 H3B 108.1 . . ?
N2 C4 C3 109.41(18) . 3_677 ?
N2 C4 H4A 109.8 . . ?
C3 C4 H4A 109.8 3_677 . ?
N2 C4 H4B 109.8 . . ?
C3 C4 H4B 109.8 3_677 . ?
H4A C4 H4B 108.2 . . ?
H1S O1S H1Q 104.4 . . ?
 
_refine_diff_density_max    0.718
_refine_diff_density_min   -0.564
_refine_diff_density_rms    0.069

_shelx_res_file
;
TITL shelxt_a.res in P2(1)/n
    shelx.res
    created by SHELXL-2018/3 at 14:31:07 on 20-Oct-2020
CELL  0.71075  11.4695   5.8774  13.6090   90.000   91.553   90.000
ZERR     4.00   0.0008   0.0004   0.0010    0.000    0.006    0.000
LATT   1
SYMM  1/2 - X, 1/2 + Y, 1/2 - Z
SFAC  FE   F    C    N    O    H
UNIT  4 20 16 8 4 56
MERG   2
OMIT -3 50
FMAP   2
PLAN   50
ACTA
BOND   $H
LIST   6
L.S.  20
WGHT    0.052300    0.453100
FVAR       1.15360
FE1   1    0.363361    0.581798    0.746712    11.00000    0.01002    0.00735 =
         0.01000    0.00028    0.00078    0.00008
F1    2    0.344750    0.517102    0.609920    11.00000    0.02299    0.01567 =
         0.01084   -0.00043   -0.00017    0.00391
F2    2    0.487842    0.365787    0.760173    11.00000    0.01604    0.01790 =
         0.02068    0.00344    0.00203    0.00603
F3    2    0.365312    0.639297    0.884005    11.00000    0.02440    0.01695 =
         0.01161   -0.00105    0.00014   -0.00414
F4    2    0.240672    0.816493    0.728948    11.00000    0.02229    0.01784 =
         0.02224   -0.00126    0.00020    0.01088
F5    2    0.474397    0.815014    0.723474    11.00000    0.01984    0.01716 =
         0.01966    0.00346    0.00090   -0.00815
N1    4    0.440976    0.115413    0.576775    11.00000    0.02612    0.01308 =
         0.01449   -0.00124    0.00729    0.00350
AFIX  23
H1A   6    0.407351    0.239700    0.600362    11.00000   -1.20000
H1B   6    0.436771    0.006576    0.622010    11.00000   -1.20000
AFIX   0
N2    4    0.454257    1.061792    0.905735    11.00000    0.02974    0.01503 =
         0.01427    0.00168   -0.00831   -0.00263
AFIX  23
H2A   6    0.443664    1.162816    0.857601    11.00000   -1.20000
H2B   6    0.419908    0.932542    0.886961    11.00000   -1.20000
AFIX   0
C1    3    0.565252    0.164580    0.557821    11.00000    0.02541    0.01813 =
         0.01927   -0.00489    0.00404   -0.00330
AFIX  23
H1C   6    0.605301    0.206314    0.618878    11.00000   -1.20000
H1D   6    0.570390    0.291849    0.512767    11.00000   -1.20000
AFIX   0
C2    3    0.376724    0.041329    0.485697    11.00000    0.01907    0.02337 =
         0.02242   -0.00237    0.00217    0.00255
AFIX  23
H2C   6    0.375383    0.164377    0.438180    11.00000   -1.20000
H2D   6    0.296789    0.004626    0.501016    11.00000   -1.20000
AFIX   0
C3    3    0.580976    1.021197    0.921776    11.00000    0.02377    0.02669 =
         0.02067   -0.00395    0.00625   -0.00502
AFIX  23
H3A   6    0.619725    1.163557    0.937978    11.00000   -1.20000
H3B   6    0.613888    0.962467    0.861962    11.00000   -1.20000
AFIX   0
C4    3    0.398821    1.147068    0.995696    11.00000    0.02034    0.02014 =
         0.02737   -0.00655   -0.00538    0.00452
AFIX  23
H4A   6    0.315765    1.167004    0.983311    11.00000   -1.20000
H4B   6    0.431906    1.293419    1.014016    11.00000   -1.20000
AFIX   0
O1S   5    0.713514    0.530610    0.769154    11.00000    0.02128    0.12369 =
         0.09936   -0.02655    0.00071   -0.00303
AFIX   3  0.9800
H1S   6    0.644511    0.493630    0.768954    11.00000   -1.20000
H1Q   6    0.713549    0.692709    0.735728    11.00000   -1.20000

AFIX   0
HKLF    4


REM  shelxt_a.res in P2(1)/n
REM wR2 = 0.0769, GooF = S = 1.045, Restrained GooF = 1.045 for all data
REM R1 = 0.0250 for 1454 Fo > 4sig(Fo) and 0.0275 for all 1588 data
REM 118 parameters refined using 0 restraints

END

WGHT      0.0342      0.8305

REM Highest difference peak  0.718,  deepest hole -0.564,  1-sigma level  0.069
Q1    1   0.7105  0.7477  0.7194  11.00000  0.05    0.72
Q2    1   0.7182  0.3365  0.7916  11.00000  0.05    0.67
Q3    1   0.4164  1.0791  1.0410  11.00000  0.05    0.30
Q4    1   0.5936  0.0740  0.5395  11.00000  0.05    0.27
Q5    1   0.3364  0.5715  0.5800  11.00000  0.05    0.25
Q6    1   0.3217  0.5781  0.6387  11.00000  0.05    0.24
Q7    1   0.5143  0.4124  0.7968  11.00000  0.05    0.24
Q8    1   0.3776  0.5667  0.8373  11.00000  0.05    0.24
Q9    1   0.4143  0.0767  0.5228  11.00000  0.05    0.22
Q10   1   0.2382  0.5829  0.7265  11.00000  0.05    0.20
Q11   1   0.4415  0.8761  0.6851  11.00000  0.05    0.20
Q12   1   0.3984  0.4736  0.6472  11.00000  0.05    0.19
Q13   1   0.6981  0.5358  0.6949  11.00000  0.05    0.19
Q14   1   0.2024  0.9076  0.6984  11.00000  0.05    0.19
Q15   1   0.6140  0.9972  0.9007  11.00000  0.05    0.18
Q16   1   0.5145  1.0633  0.9185  11.00000  0.05    0.18
Q17   1   0.4781  0.9501  0.7662  11.00000  0.05    0.18
Q18   1   0.4521  0.8371  0.6640  11.00000  0.05    0.18
Q19   1   0.6871  0.5095  0.7631  11.00000  0.05    0.17
Q20   1   0.3408  0.6697  0.8695  11.00000  0.05    0.17
Q21   1   0.3427  1.0938  1.0053  11.00000  0.05    0.17
Q22   1   0.5865  1.1158  0.9445  11.00000  0.05    0.17
Q23   1   0.2187  0.8704  0.6850  11.00000  0.05    0.17
Q24   1   0.4418  0.4084  0.7816  11.00000  0.05    0.16
Q25   1   0.2885  0.8790  0.7231  11.00000  0.05    0.15
Q26   1   0.4383  1.1125  0.9594  11.00000  0.05    0.15
Q27   1   0.3295  0.6006  0.9265  11.00000  0.05    0.15
Q28   1   0.5796  0.1752  0.5988  11.00000  0.05    0.15
Q29   1   0.4101  1.4040  0.9772  11.00000  0.05    0.15
Q30   1   0.3640  0.0903  0.4676  11.00000  0.05    0.15
Q31   1   0.4314  1.3759  1.1055  11.00000  0.05    0.15
Q32   1   0.5121  0.1255  0.5648  11.00000  0.05    0.15
Q33   1   0.4083  1.2426  0.9961  11.00000  0.05    0.15
Q34   1   0.4385  0.3475  0.7750  11.00000  0.05    0.14
Q35   1   0.4535  0.4187  0.7212  11.00000  0.05    0.14
Q36   1   0.4807  1.3321  1.0048  11.00000  0.05    0.14
Q37   1   0.4495  1.4673  1.0697  11.00000  0.05    0.14
Q38   1   0.3114  1.0565  0.8790  11.00000  0.05    0.13
Q39   1   0.2387  0.7509  0.7064  11.00000  0.05    0.13
Q40   1   0.3160  1.0469  0.7044  11.00000  0.05    0.13
Q41   1   0.5442  0.2441  0.5032  11.00000  0.05    0.13
Q42   1   0.5531  0.5704  0.7246  11.00000  0.05    0.13
Q43   1   0.5197  0.3224  0.4784  11.00000  0.05    0.12
Q44   1   0.2164 -0.0203  0.5010  11.00000  0.05    0.12
Q45   1   0.2588  0.9123  0.7650  11.00000  0.05    0.12
Q46   1   0.6455  0.8714  0.8594  11.00000  0.05    0.12
Q47   1   0.3255  0.1984  0.3576  11.00000  0.05    0.12
Q48   1   0.6231  0.3784  0.4721  11.00000  0.05    0.12
Q49   1   0.4384  0.5001  0.5963  11.00000  0.05    0.12
Q50   1   0.3985  0.7805  0.9022  11.00000  0.05    0.11
;
_shelx_res_checksum   11401

_shelx_hkl_file
;
   0   0   1   -0.82    5.68   1-0.77976-0.79750-0.26655-0.21763-0.56648-0.56268
   0   0  -1    5.68    5.97   1-0.79029-0.77256-0.21413-0.26305-0.57408-0.57788
   0   0   1    3.47    4.09   1-0.77764-0.79542-0.35133-0.30247 0.52137 0.52517
   0   0  -1    1.32    3.67   1-0.75348-0.73571-0.29218-0.34104 0.58896 0.58516
   0   0  -1   -0.18    4.66   1-0.39341-0.37536-0.18752-0.23629 0.90003 0.89625
   0   0   1   -2.04    5.92   1-0.35121-0.36924-0.22744-0.17863 0.90824 0.91200
   0   0  -3   25.04    9.07   1-0.79852-0.74531-0.16100-0.30777-0.58002-0.59142
   0   0   3   19.51   12.40   1-0.79510-0.84844-0.40768-0.26109 0.44898 0.46039
   0   0   3   19.46    8.45   1-0.30700-0.36108-0.26727-0.12084 0.91340 0.92467
   0   0  -5   -1.30    8.17   1-0.80443-0.71574-0.10716-0.35178-0.58429-0.60328
   0   0   5   -7.04    7.95   1-0.80571-0.89459-0.46116-0.21683 0.37168 0.39075
   0   0   5   -3.55    8.77   1-0.26144-0.35156-0.30634-0.06229 0.91531 0.93408
   0   0  -7  -63.57   41.35   1-0.80798-0.68390-0.05257-0.39507-0.58685-0.61334
   0   0   7    2.94    7.85   1-0.80909-0.93351-0.51158-0.16953 0.28922 0.31592
   0   0  -9    8.73   12.20   1-0.80910-0.64957 0.00272-0.43763-0.58766-0.62172
   0   0   9    4.53    8.57   1-0.80460-0.96458-0.55870-0.11892 0.20113 0.23545
   0   0   9    5.59   11.80   1-0.16612-0.32834-0.38217 0.05711 0.90903 0.94282
   0   0 -10 1214.85   59.73   1-0.80872-0.63146 0.03066-0.45862-0.58738-0.62523
   0   0  10 1064.35   57.59   1-0.79912-0.97687-0.58090-0.09225 0.15476 0.19289
   0   0  10 1266.41   62.27   1-0.14137-0.32162-0.40062 0.08747 0.90526 0.94281
   0   0 -11    4.28    8.62   1-0.80770-0.61272 0.05880-0.47941-0.58665-0.62827
   0   0  11   -1.20    6.86   1-0.79157-0.98649-0.60137-0.06332 0.10841 0.15106
   0   0  11    8.15    9.64   1-0.11625-0.31452-0.41886 0.11804 0.90057 0.94188
   0   0 -12 3724.91  168.74   1-0.80602-0.59331 0.08713-0.50000-0.58543-0.63084
   0   0  12 3493.69  168.41   1-0.78122-0.99385-0.62149-0.03453 0.05861 0.10514
   0   0  12 3747.15  164.11   1-0.09075-0.30699-0.43685 0.14885 0.89494 0.93999
   0   0 -13    7.16   12.74   1-0.80366-0.57322 0.11568-0.52039-0.58373-0.63292
   0   0  13   10.04   11.48   1-0.06481-0.29907-0.45464 0.17987 0.88830 0.93712
   0   0 -14 1515.07   71.70   1-0.80060-0.55244 0.14444-0.54056-0.58152-0.63450
   0   0  14 1604.38   75.33   1-0.03844-0.29072-0.47220 0.21113 0.88065 0.93322
   0   0 -15   -1.20   17.39   1-0.79681-0.53093 0.17342-0.56051-0.57879-0.63555
   0   0  15  -12.14   17.17   1-0.01163-0.28193-0.48950 0.24263 0.87192 0.92824
   0   0 -16 1284.46   50.24   1-0.79228-0.50867 0.20263-0.58022-0.57552-0.63607
   0   0  16 1283.19   56.40   1 0.01564-0.27267-0.50655 0.27440 0.86206 0.92214
   0   0 -17    1.20   16.48   1-0.78696-0.48563 0.23208-0.59970-0.57168-0.63601
   0   0  17   -0.64   17.13   1 0.04341-0.26292-0.52332 0.30643 0.85102 0.91485
   0   1   0    8.98    8.02   1-0.09239-0.16954 0.99323 0.97228-0.07032-0.16095
   0  -1   0   -0.27    5.78   1-0.74566-0.66922-0.27539-0.25463 0.60674 0.69806
   0   1   0    4.44    9.39   1-0.72875-0.80558 0.24169 0.22029 0.64070 0.55000
   0  -1   0    2.50    6.42   1-0.78452-0.70771 0.37140 0.39278 0.49656 0.58724
   0   1   1   57.66    9.35   1 0.22772 0.13287 0.96036 0.98837 0.16074 0.07385
   0   1  -1   60.97   11.09   1-0.40381-0.46326 0.86593 0.79605-0.29511-0.38947
   0  -1   1   56.21    8.20   1-0.75363-0.69491-0.29250-0.22290 0.58862 0.68367
   0  -1  -1   47.97    9.74   1-0.74228-0.64805-0.26839-0.29649 0.61398 0.70151
   0   1   1   51.04    7.96   1-0.61312-0.70799 0.06046 0.08783 0.78766 0.70073
   0   1  -1   57.86    9.78   1-0.79963-0.85836 0.57921 0.50904 0.15842 0.06392
   0  -1   1   55.13    8.68   1-0.70760-0.64886 0.68770 0.75787-0.16235-0.06785
   0   1  -2  164.33   13.41   1-0.59641-0.63813 0.67514 0.55629-0.43413-0.53227
   0  -1  -2  151.30   11.59   1-0.44463-0.33212-0.83483-0.91179-0.32458-0.24150
   0  -1   2  171.34   12.39   1-0.76329-0.72235-0.31461-0.19615 0.56426 0.66312
   0  -1  -2  160.21   10.88   1-0.75394-0.64188-0.29318-0.37017 0.58788 0.67153
   0   1   2  129.83    9.75   1-0.46210-0.57413 0.11809 0.19505 0.87892 0.79519
   0   1  -2  149.52   13.40   1 0.18383 0.14305-0.59899-0.71801 0.77936 0.68117
   0   1   2  155.44   12.02   1-0.53446-0.64739-0.03781 0.03831 0.84434 0.76119
   0   1  -3   13.82    9.75   1-0.69065-0.71458 0.52041 0.35268-0.50216-0.60413
   0  -1  -3   11.19    8.14   1-0.57481-0.44455-0.70313-0.82900-0.41855-0.33929
   0  -1   3    9.66    6.40   1-0.77299-0.74983-0.33881-0.17148 0.53636 0.63901
   0  -1   3    8.66    6.91   1 0.20583 0.22859-0.60942-0.44159 0.76566 0.86760
   0   1   3   12.09    6.57   1-0.47719-0.60817-0.10200 0.02289 0.87285 0.79347
   0   1  -4 4258.20  152.21   1-0.73553-0.74174 0.41621 0.19955-0.53455-0.64030
   0  -1  -4 4540.18  157.11   1-0.65238-0.50436-0.59094-0.76572-0.47453-0.39910
   0  -1   4 4639.19  161.93   1-0.78206-0.77668-0.36399-0.14780 0.50584 0.61230
   0  -1   4 4628.60  164.38   1 0.07845 0.08320-0.54364-0.32702 0.83563 0.94134
   0   1   4 4498.26  158.99   1-0.43125-0.58028-0.15001 0.02366 0.88967 0.81406
   0   1  -5 3817.23  140.42   1-0.75786-0.74634 0.34985 0.08427-0.55067-0.66019
   0  -1  -5 3628.30  127.83   1-0.70131-0.53554-0.49820-0.72189-0.50985-0.43825
   0  -1   5 4005.01  148.67   1-0.79013-0.80253-0.38955-0.12450 0.47321 0.58347
   0  -1   5 3863.00  141.78   1 0.02026 0.00699-0.50938-0.24394 0.86029 0.96976
   0   1   5 3998.93  149.56   1-0.39177-0.55886-0.18912 0.03332 0.90041 0.82859
   0   1  -6 3892.94  138.30   1-0.76945-0.74021 0.30888-0.00563-0.55904-0.67234
   0  -1  -6 3905.14  135.63   1-0.73400-0.55048-0.42030-0.69289-0.53345-0.46567
   0  -1   6 4124.37  150.49   1-0.79696-0.82714-0.41515-0.10124 0.43873 0.55280
   0  -1   6 4106.61  151.89   1-0.00596-0.03725-0.49310-0.17885 0.86995 0.98316
   0   1   6 4014.59  144.47   1-0.35620-0.54134-0.22283 0.04838 0.90745 0.83940
   0   1  -7  225.52   16.06   1-0.77548-0.72847 0.28496-0.07843-0.56339-0.68057
   0  -1  -7  218.07   16.11   1-0.75687-0.55559-0.35311-0.67461-0.54996-0.48600
   0  -1   7  235.21   15.81   1-0.80239-0.85035-0.44056-0.07778 0.40257 0.52043
   0  -1   7  241.12   16.58   1-0.01535-0.06466-0.48713-0.12408 0.87318 0.99016
   0   1   7  213.06   16.29   1-0.32310-0.52630-0.25299 0.06698 0.91191 0.84765
   0   1  -8 1519.87   56.64   1-0.77838-0.71364 0.27266-0.13966-0.56548-0.68644
   0  -1  -8 1554.92   60.30   1-0.77336-0.55444-0.29362-0.66412-0.56186-0.50152
   0  -1   8 1585.77   59.66   1-0.80628-0.87194-0.46554-0.05390 0.36491 0.48662
   0  -1   8 1595.03   59.69   1-0.01485-0.08218-0.48746-0.07559 0.87301 0.99374
   0   1   8 1466.74   54.74   1-0.29211-0.51311-0.28025 0.08884 0.91439 0.85371
   0   1  -9    3.07    9.34   1-0.77929-0.69682 0.26865-0.19260-0.56614-0.69089
   0  -1  -9    0.55   10.27   1-0.78544-0.54878-0.23981-0.65923-0.57058-0.51404
   0  -1   9   -1.95    9.34   1-0.80855-0.89198-0.49014-0.02964 0.32557 0.45109
   0  -1   9    0.67    9.37   1-0.00800-0.09334-0.49181-0.03113 0.87066 0.99514
   0   1   9    9.17   11.26   1-0.26167-0.50069-0.30615 0.11175 0.91531 0.85837
   0   1 -10 1451.22   70.84   1-0.77882-0.67863 0.27071-0.23947-0.56580-0.69433
   0  -1 -10 1514.17   73.13   1-0.79430-0.53990-0.19019-0.65853-0.57698-0.52424
   0  -1  10 1462.83   70.45   1-0.80905-0.91026-0.51418-0.00481 0.28466 0.41400
   0  -1  10 1527.41   74.86   1 0.00321-0.10015-0.49885 0.01062 0.86667 0.99491
   0   1  10 1539.05   72.98   1-0.23191-0.48896-0.33066 0.13605 0.91480 0.86163
   0   1 -11  585.38   27.21   1-0.77729-0.65937 0.27735-0.28176-0.56470-0.69701
   0  -1 -11  579.98   26.31   1-0.80068-0.52854-0.14373-0.66100-0.58158-0.53264
   0  -1  11  606.06   23.77   1-0.80768-0.92666-0.53758 0.02065 0.24216 0.37531
   0  -1  11  576.39   26.13   1 0.01759-0.10378-0.50775 0.05054 0.86132 0.99331
   0   1  11  590.67   23.56   1-0.20258-0.47765-0.35407 0.16144 0.91301 0.86358
   0   1 -12  633.97   35.75   1-0.77486-0.63922 0.28753-0.32051-0.56294-0.69904
   0  -1 -12  596.39   33.06   1-0.80506-0.51519-0.09969-0.66588-0.58474-0.53960
   0  -1  12  712.46   39.26   1-0.80430-0.94106-0.56025 0.04684 0.19801 0.33498
   0  -1  12  599.46   33.52   1 0.03440-0.10500-0.51795 0.08915 0.85471 0.99046
   0   1  12  676.14   36.76   1-0.17348-0.46658-0.37658 0.18774 0.90999 0.86432
   0   1 -13   19.53   14.10   1-0.77162-0.61825 0.30051-0.35646-0.56061-0.70049
   0  -1 -13    0.37   16.67   1-0.80776-0.50026-0.05749-0.67267-0.58669-0.54520
   0  -1  13   11.98   13.04   1-0.79875-0.95327-0.58210 0.07385 0.15214 0.29291
   0  -1  13   15.37   12.97   1 0.05313-0.10429-0.52905 0.12685 0.84692 0.98642
   0   1  13    6.65   10.23   1-0.14448-0.45560-0.39833 0.21481 0.90578 0.86387
   0   1 -14 1203.66   57.36   1-0.76763-0.59661 0.31569-0.39027-0.55773-0.70124
   0  -1 -14 1169.06   58.95   1-0.80899-0.48376-0.01678-0.68088-0.58758-0.54987
   0  -1  14 1116.37   57.37   1-0.79106-0.96247-0.60253 0.10280 0.10567 0.25116
   0  -1  14 1211.58   60.40   1 0.07345-0.10198-0.54081 0.16391 0.83793 0.98118
   0   1  14 1253.01   59.53   1-0.11547-0.44461-0.41941 0.24253 0.90041 0.86226
   0   1 -15  148.34   17.63   1-0.76288-0.57413 0.33281-0.42208-0.55429-0.70158
   0  -1 -15  138.04   16.69   1-0.80889-0.46594 0.02278-0.69024-0.58751-0.55358
   0  -1  15  141.58   17.29   1 0.09515-0.09831-0.55300 0.20053 0.82772 0.97474
   0   1  15  152.34   16.48   1-0.08633-0.43346-0.43992 0.27083 0.89387 0.85950
   0   1 -16  119.73   16.71   1-0.75736-0.55089 0.35150-0.45232-0.55031-0.70137
   0  -1 -16  126.23   16.08   1-0.80757-0.44689 0.06147-0.70048-0.58655-0.55641
   0  -1  16   90.17   16.49   1 0.11805-0.09343-0.56547 0.23686 0.81627 0.96703
   0   1  16  107.94   19.58   1-0.05703-0.42219-0.45987 0.29968 0.88614 0.85553
   0   1 -17   12.87   16.72   1-0.75106-0.52686 0.37154-0.48121-0.54576-0.70060
   0  -1 -17    4.93   20.72   1-0.80508-0.42668 0.09946-0.71142-0.58476-0.55840
   0   1  17  -10.48   18.53   1-0.02749-0.41066-0.47933 0.32903 0.87720 0.85034
   0   2   0 6268.69  208.55   1-0.04195-0.19625 0.99854 0.95665-0.03392-0.21518
   0  -2   0 5956.64  213.17   1-0.76643-0.61343-0.32218-0.28072 0.55567 0.73817
   0   2   1 3795.77  130.91   1 0.12729-0.04471 0.98793 0.99500 0.08824-0.08924
   0   2  -1 3933.35  138.22   1-0.20903-0.34557 0.96562 0.87479-0.15452-0.33958
   0  -2   1 3913.73  138.29   1-0.76796-0.63274-0.32596-0.23563 0.55134 0.73764
   0  -2  -1 3845.87  142.73   1-0.76849-0.59771-0.32729-0.33468 0.54980 0.72850
   0   2   1 4068.92  155.79   1-0.62418-0.79586 0.07548 0.08144 0.77762 0.59996
   0   2   2    7.02    7.89   1 0.27903 0.08935 0.93969 0.99571 0.19778 0.02400
   0   2  -2    2.48    8.88   1-0.35387-0.47275 0.89869 0.75893-0.25906-0.44779
   0  -2  -2    6.65    5.35   1-0.77596-0.58740-0.34672-0.40298 0.52693 0.70182
   0  -2   2    3.40    7.57   1-0.77174-0.65430-0.33555-0.19636 0.54018 0.73029
   0   2   2   11.44    6.78   1-0.56952-0.75927 0.00433 0.05906 0.82195 0.64808
   0   2  -2    5.50    5.41   1-0.80876-0.92622 0.49428 0.35395 0.31871 0.12971
   0   2  -3 4320.31  150.08   1-0.46631-0.56751 0.81657 0.62779-0.34022-0.53272
   0  -2  -3 4376.92  156.23   1-0.79066-0.58432-0.39136-0.49648 0.47083 0.64192
   0  -2   3 4503.54  155.09   1-0.77683-0.67716-0.34909-0.16103 0.52408 0.71799
   0   2   3 4176.97  152.03   1-0.52278-0.73058-0.05135 0.05215 0.85091 0.68083
   0   2  -4  115.35   12.35   1-0.54729-0.63076 0.73588 0.49816-0.39867-0.59495
   0  -2  -4  121.05   12.01   1-0.49757-0.27254-0.78791-0.94183-0.36279-0.19663
   0  -2  -4  105.94   11.06   1-0.80836-0.58418-0.48717-0.64118 0.33045 0.49760
   0  -2   4  114.66   11.45   1-0.78252-0.70064-0.36535-0.12843 0.50415 0.70185
   0   2   4  125.30   11.72   1-0.48156-0.70740-0.09729 0.05496 0.87099 0.70467
   0   2  -4  109.54    9.46   1-0.60581-0.68710 0.71297 0.47507-0.35306-0.54971
   0   2  -5 1285.28   52.44   1-0.60343-0.66916 0.66555 0.37892-0.43920-0.63924
   0  -2  -5 1228.01   48.87   1-0.57210-0.32932-0.70650-0.90934-0.41659-0.25425
   0  -2   5 1287.91   52.81   1-0.78833-0.72422-0.38350-0.09772 0.48108 0.68259
   0   2   5 1249.83   50.88   1-0.44403-0.68793-0.13694 0.06409 0.88548 0.72293
   0   2  -5 1085.59   51.50   1-0.46073-0.52394 0.70185 0.41517-0.54324-0.74371
   0   2  -6 2395.84   85.89   1-0.64173-0.68974 0.60845 0.27289-0.46685-0.67065
   0  -2  -6 2347.33   84.87   1-0.62896-0.36843-0.62847-0.88021-0.45763-0.29912
   0  -2   6 2330.38   84.65   1-0.79388-0.74755-0.40298-0.06833 0.45536 0.66067
   0  -2   6 2350.26   90.32   1 0.36693 0.41247-0.67263-0.33692 0.64258 0.84636
   0   2   6 2495.39   88.88   1-0.40910-0.67105-0.17218 0.07762 0.89609 0.73733
   0   2  -7 3916.47  129.49   1-0.66771-0.69800 0.56421 0.17971-0.48560-0.69317
   0  -2  -7 3957.68  127.10   1-0.67259-0.39431-0.55530-0.85595-0.48912-0.33444
   0  -2   7 3792.92  129.96   1-0.79887-0.77032-0.42334-0.03984 0.42729 0.63640
   0  -2   7 3901.92  134.07   1 0.29841 0.32590-0.64871-0.26425 0.70008 0.90771
   0   2   7 4035.80  135.72   1-0.37598-0.65599-0.20425 0.09432 0.90383 0.74884
   0   2  -8 1568.84   63.96   1-0.68521-0.69763 0.53126 0.09795-0.49823-0.70972
   0  -2  -8 1562.19   62.20   1-0.70638-0.41035-0.48715-0.83671-0.51351-0.36265
   0  -2   8 1628.86   64.45   1-0.80307-0.79230-0.44428-0.01191 0.39709 0.61001
   0  -2   8 1630.15   63.67   1 0.25501 0.26448-0.63124-0.19797 0.73246 0.94385
   0   2   8 1613.84   64.27   1-0.34413-0.64220-0.23395 0.11339 0.90930 0.75809
   0   2  -9  502.51   29.64   1-0.69683-0.69153 0.50768 0.02544-0.50662-0.72189
   0  -2  -9  480.76   29.53   1-0.73275-0.41896-0.42362-0.82209-0.53255-0.38551
   0  -2   9  515.42   30.71   1-0.80627-0.81316-0.46543 0.01579 0.36509 0.58182
   0  -2   9  501.18   29.82   1 0.22901 0.22046-0.61996-0.13789 0.75046 0.96559
   0   2   9  483.34   30.01   1-0.31318-0.62931-0.26181 0.13429 0.91288 0.76545
   0   2 -10   34.18   12.51   1-0.70424-0.68122 0.49184-0.03932-0.51197-0.73102
   0  -2 -10   40.84   11.88   1-0.75343-0.42189-0.36414-0.81152-0.54747-0.40426
   0  -2  10   33.97    8.78   1-0.80834-0.83300-0.48682 0.04326 0.33102 0.55156
   0  -2  10   35.30   10.38   1 0.21509 0.18852-0.61368-0.08280 0.75968 0.97857
   0   2  10   30.59    9.46   1-0.28332-0.61716-0.28782 0.15750 0.91481 0.77090
   0   2 -11 1266.46   62.39   1-0.70854-0.66779 0.48234-0.09775-0.51507-0.73789
   0  -2 -11 1198.53   58.84   1-0.76966-0.42051-0.30807-0.80446-0.55919-0.41952
   0  -2  11 1222.83   60.53   1-0.80910-0.85154-0.50817 0.07078 0.29513 0.51949
   0  -2  11 1284.34   63.46   1 0.20980 0.16520-0.61125-0.03156 0.76311 0.98575
   0   2  11 1186.60   58.49   1-0.25339-0.60525-0.31305 0.18108 0.91530 0.77515
   0   2 -12 1195.97   40.14   1-0.71045-0.65197 0.47804-0.15098-0.51645-0.74305
   0  -2 -12 1151.16   59.71   1-0.78231-0.41541-0.25494-0.80025-0.56832-0.43245
   0  -2  12 1237.29   40.90   1-0.80839-0.86861-0.52935 0.09847 0.25744 0.48561
   0  -2  12 1234.53   46.22   1 0.21088 0.14826-0.61175 0.01674 0.76241 0.98880
   0   2  12 1244.97   44.25   1-0.22370-0.59359-0.33729 0.20566 0.91443 0.77803
   0   2 -13 1347.42   62.34   1-0.71045-0.63425 0.47804-0.19991-0.51645-0.74682
   0  -2 -13 1292.38   61.39   1-0.79201-0.40738-0.20424-0.79847-0.57532-0.44325
   0  -2  13 1218.34   62.37   1-0.80607-0.88406-0.55021 0.12647 0.21795 0.44993
   0  -2  13 1174.51   56.27   1 0.21683 0.13619-0.61448 0.06283 0.75854 0.98868
   0   2  13 1329.00   64.95   1-0.19414-0.58205-0.36068 0.23108 0.91226 0.77961
   0   2 -14  902.97   31.25   1-0.70886-0.61494 0.48163-0.24526-0.51530-0.74945
   0  -2 -14  915.98   33.47   1-0.79923-0.39686-0.15556-0.79872-0.58053-0.45226
   0  -2  14  868.27   29.80   1-0.80197-0.89772-0.57065 0.15489 0.17662 0.41241
   0  -2  14  855.74   34.50   1 0.22660 0.12794-0.61889 0.10723 0.75207 0.98596
   0   2  14  907.02   32.73   1-0.16459-0.57053-0.38332 0.25724 0.90882 0.77994
   0   2 -15 1487.88   56.90   1-0.70590-0.59425 0.48822-0.28760-0.51316-0.75109
   0  -2 -15 1528.82   56.68   1-0.80431-0.38420-0.10856-0.80064-0.58420-0.45972
   0  -2  15 1369.43   54.59   1-0.79589-0.90943-0.59055 0.18386 0.13338 0.37299
   0   2  15 1410.60   52.04   1-0.13498-0.55894-0.40531 0.28407 0.90415 0.77902
   0   2 -16  263.37   21.97   1-0.70169-0.57232 0.49737-0.32738-0.51013-0.75183
   0  -2 -16  262.95   19.41   1-0.80749-0.36965-0.06296-0.80396-0.58650-0.46582
   0   2  16  267.15   20.75   1-0.10522-0.54721-0.42670 0.31149 0.89824 0.77687
   0   2 -17  888.25   33.90   1-0.69634-0.54925 0.50872-0.36496-0.50626-0.75174
   0  -2 -17  903.71   36.19   1-0.80896-0.35350-0.01850-0.80848-0.58756-0.47052
   0   2  17  853.45   30.97   1-0.07520-0.53521-0.44758 0.33940 0.89107 0.77353
   0   3   0    2.35    7.81   1 0.00911-0.22229 0.99995 0.93714 0.00294-0.26897
   0  -3   0   -0.58    6.39   1-0.78351-0.55401-0.36832-0.30612 0.50043 0.77418
   0   3   0    3.83    7.32   1-0.64134-0.87178 0.09952 0.03531 0.76076 0.48861
   0   3   1 2850.93  101.93   1 0.12276-0.12638 0.98879 0.97492 0.08498-0.18315
   0   3  -1 3040.97  107.88   1-0.10358-0.31726 0.99152 0.87975-0.07840-0.35409
   0  -3  -1 3030.93  108.12   1-0.78614-0.53886-0.37642-0.36308 0.49018 0.76012
   0  -3   1 2832.86  101.74   1-0.78301-0.57129-0.36680-0.25573 0.50234 0.77988
   0   3   1 2886.59  112.54   1-0.59764-0.84614 0.04000 0.02457 0.80075 0.53238
   0   3  -1 2826.11  107.01   1-0.68978-0.90221 0.17326 0.06028 0.70297 0.42705
   0   3   2    9.14    6.99   1 0.23109-0.03571 0.95915 0.99422 0.16317-0.10125
   0   3  -2    6.28    9.71   1-0.20876-0.40469 0.96571 0.80499-0.15432-0.43382
   0  -3  -2    8.69    7.51   1-0.79125-0.52619-0.39344-0.42896 0.46809 0.73424
   0  -3   2    8.68    7.32   1-0.78415-0.59020-0.37024-0.21031 0.49802 0.77937
   0   3   2    4.04    8.48   1-0.55811-0.82467-0.00965 0.02367 0.82970 0.56511
   0   3  -2    7.31    5.73   1-0.74185-0.93620 0.26751 0.10577 0.61489 0.33516
   0   3   3 3059.79  109.44   1 0.32956 0.04504 0.91460 0.99863 0.23425-0.02640
   0   3  -3 3177.36  115.76   1-0.30167-0.48000 0.92734 0.71770-0.22139-0.50447
   0  -3  -3 3167.26  111.23   1-0.79876-0.51592-0.42288-0.50726 0.42795 0.69029
   0  -3   3 3197.51  109.60   1-0.78647-0.61031-0.37748-0.16868 0.48884 0.77399
   0   3   3 2957.80  108.54   1-0.52175-0.80637-0.05252 0.02957 0.85147 0.59066
   0   3  -3 3127.63  118.07   1-0.78886-0.96504 0.38527 0.17475 0.47879 0.19529
   0   3  -4   38.53   12.52   1-0.37980-0.54039 0.88237 0.62379-0.27778-0.56466
   0  -3  -4   22.89    8.10   1-0.41223-0.11020-0.85985-0.99292-0.30119-0.04430
   0  -3  -4   33.10    8.02   1-0.80680-0.50608-0.46989-0.60317 0.35812 0.61648
   0  -3   4   23.33    7.26   1-0.78957-0.63119-0.38765-0.13000 0.47569 0.76465
   0   3   4   29.48    9.22   1-0.48779-0.79044-0.09052 0.04033 0.86825 0.61120
   0   3  -4   24.55    6.03   1-0.80907-0.96716 0.51342 0.25413 0.28600-0.00131
   0   3  -5 1951.97   70.63   1-0.44325-0.58619 0.83595 0.52831-0.32358-0.61421
   0  -3  -5 1905.55   66.28   1-0.48595-0.16617-0.79889-0.98087-0.35440-0.10134
   0  -3  -5 1851.30   70.59   1-0.80679-0.48829-0.54520-0.72735 0.22766 0.48221
   0  -3   5 1936.44   69.71   1-0.79311-0.65250-0.40010-0.09359 0.45922 0.75198
   0   3   5 1920.77   70.71   1-0.45546-0.77617-0.12507 0.05456 0.88142 0.62815
   0   3  -5 1903.92   67.35   1-0.78205-0.92208 0.62008 0.31202 0.06225-0.22889
   0   3  -6   16.54    8.56   1-0.49328-0.61849 0.79201 0.43543-0.35969-0.65411
   0  -3  -6   11.02    9.52   1-0.54791-0.21038-0.73517-0.96605-0.39913-0.14989
   0  -3   6    9.13   11.60   1-0.79676-0.67394-0.41433-0.05895 0.43986 0.73642
   0   3   6    2.10   10.46   1-0.42435-0.76312-0.15697 0.07142 0.89178 0.64229
   0   3  -6    8.44    5.87   1-0.71640-0.83834 0.68313 0.32628-0.14173-0.43670
   0   3  -7 3079.02  139.78   1-0.53206-0.63954 0.75272 0.34720-0.38769-0.68587
   0  -3  -7 3190.81  142.60   1-0.59951-0.24423-0.67093-0.95072-0.43637-0.19096
   0  -3   7 3265.43  146.14   1-0.80029-0.69524-0.42993-0.02569 0.41794 0.71830
   0   3   7 3049.91  138.22   1-0.39412-0.75094-0.18684 0.09033 0.89986 0.65415
   0   3  -7 2775.45  134.66   1-0.63955-0.74341 0.70891 0.30328-0.29732-0.59612
   0   3  -8   73.27   16.57   1-0.56169-0.65143 0.71913 0.26468-0.40907-0.71103
   0  -3  -8   43.09    9.81   1-0.64230-0.26925-0.60755-0.93625-0.46726-0.22566
   0  -3   8   51.79   11.99   1-0.80347-0.71620-0.44657 0.00652 0.39369 0.69786
   0   3   8   42.66   14.34   1-0.36451-0.73938-0.21507 0.11086 0.90601 0.66409
   0   3  -8   29.13    7.12   1-0.57049-0.65626 0.71401 0.25959-0.40585-0.70847
   0   3  -9 1114.89   40.09   1-0.58403-0.65604 0.69145 0.18810-0.42520-0.73090
   0  -3  -9 1076.82   35.23   1-0.67769-0.28690-0.54577-0.92338-0.49281-0.25504
   0  -3   9 1106.18   37.64   1-0.80609-0.73660-0.46401 0.03795 0.36729 0.67525
   0   3   9 1084.02   34.22   1-0.33531-0.72824-0.24200 0.13271 0.91049 0.67234
   0   3 -10  100.36   18.55   1-0.60056-0.65486 0.66949 0.11721-0.43713-0.74660
   0  -3 -10   92.75   14.99   1-0.70693-0.29839-0.48593-0.91245-0.51391-0.27997
   0  -3  10   95.33   13.65   1-0.80797-0.75609-0.48187 0.06894 0.33907 0.65081
   0   3  10   95.51   12.68   1-0.30681-0.71745-0.26743 0.15651 0.91342 0.67878
   0   3 -11  514.62   32.41   1-0.61249-0.64907 0.65280 0.05158-0.44574-0.75897
   0  -3 -11  532.36   31.91   1-0.73103-0.30473-0.42812-0.90355-0.53131-0.30119
   0  -3  11  539.58   34.50   1-0.80898-0.77487-0.50025 0.09942 0.30868 0.62424
   0   3  11  564.61   35.38   1-0.27803-0.70669-0.29234 0.18041 0.91500 0.68412
   0   3 -12    6.09   16.97   1-0.62071-0.63957 0.64085-0.00930-0.45168-0.76867
   0  -3 -12   -9.01   14.64   1-0.75082-0.30677-0.37228-0.89662-0.54559-0.31929
   0  -3  12   -8.72   14.95   1-0.80894-0.79260-0.51885 0.12969 0.27640 0.59577
   0   3  12   -7.53   17.15   1-0.24928-0.69597-0.31645 0.20512 0.91526 0.68814
   0   3 -13    8.33   11.82   1-0.62590-0.62704 0.63310-0.06599-0.45542-0.77618
   0  -3 -13   17.42   13.80   1-0.76694-0.30529-0.31824-0.89160-0.55723-0.33442
   0  -3  13   21.07   15.12   1-0.80769-0.80913-0.53752 0.15988 0.24226 0.56545
   0   3  13   18.02   16.04   1-0.22050-0.68522-0.33986 0.23052 0.91425 0.69089
   0   3 -14  370.58   30.05   1-0.62856-0.61198 0.62907-0.11896-0.45734-0.78186
   0  -3 -14  337.02   24.89   1-0.77991-0.30052-0.26590-0.88818-0.56659-0.34758
   0  -3  14  354.98   26.14   1-0.80508-0.82430-0.55614 0.19013 0.20626 0.53326
   0   3  14  356.11   26.27   1-0.19162-0.67435-0.36264 0.25655 0.91201 0.69240
   0   3 -15  257.09   23.81   1-0.62907-0.59477 0.62830-0.16867-0.45771-0.78599
   0  -3 -15  269.49   18.06   1-0.79013-0.29300-0.21504-0.88624-0.57397-0.35876
   0  -3  15  235.92   21.46   1-0.80095-0.83794-0.57456 0.22057 0.16838 0.49919
   0   3  15  252.06   20.30   1-0.16256-0.66333-0.38485 0.28314 0.90854 0.69269
   0   3 -16  111.35   25.27   1-0.62769-0.57568 0.63040-0.21551-0.45671-0.78876
   0  -3 -16  126.43   16.22   1-0.79792-0.28305-0.16549-0.88561-0.57959-0.36818
   0   3  16  112.23   17.24   1-0.13329-0.65208-0.40654 0.31027 0.90385 0.69175
   0   4   0 3229.23  117.86   1 0.06071-0.24782 0.99734 0.91359 0.04019-0.32236
   0  -4   0 3432.47  128.13   1-0.79648-0.49048-0.41318-0.33024 0.44145 0.80644
   0   4   0 3227.85  118.47   1-0.58449-0.89174 0.02309-0.06251 0.81106 0.44818
   0   4   111312.43  379.02   1 0.14566-0.18061 0.98411 0.94931 0.10151-0.25726
   0   4  -111999.20  514.52   1-0.02364-0.31447 0.99950 0.86678-0.02070-0.38702
   0  -4  -112468.53  538.97   1-0.79868-0.47489-0.42249-0.38842 0.42849 0.78968
   0  -4   111305.52  372.95   1-0.79543-0.50721-0.40897-0.27717 0.44723 0.81603
   0   4   111594.73  405.09   1-0.55415-0.87946-0.01444-0.05129 0.83228 0.47319
   0   4   2 1509.18   59.53   1 0.22846-0.11547 0.96010 0.97422 0.16127-0.19379
   0   4  -2 1636.36   62.23   1-0.10452-0.37759 0.99137 0.80971-0.07908-0.44920
   0  -4  -2 1640.20   63.37   1-0.80194-0.46038-0.43815-0.45294 0.40608 0.76347
   0  -4   2 1524.56   58.43   1-0.79541-0.52497-0.40888-0.22822 0.44735 0.81995
   0   4   2 1537.05   59.32   1-0.52513-0.86850-0.04863-0.03671 0.84962 0.49431
   0   4  -2 1481.85   62.12   1-0.65140-0.92254 0.11405-0.06909 0.75011 0.37966
   0   4   3 7463.24  253.24   1 0.30689-0.05475 0.92646 0.98954 0.21788-0.13342
   0   4  -3 7143.39  246.70   1-0.17955-0.43487 0.97468 0.74408-0.13324-0.50717
   0  -4  -3 7720.49  265.62   1-0.80580-0.44646-0.46182-0.52546 0.37066 0.72425
   0  -4   3 7984.89  276.80   1-0.79624-0.54357-0.41217-0.18264 0.44284 0.81924
   0   4   3 7000.32  249.00   1-0.49711-0.85851-0.08027-0.01959 0.86396 0.51241
   0   4  -3 6776.08  274.08   1-0.68907-0.94218 0.17209-0.05980 0.70395 0.32972
   0   4   4 2166.92  100.47   1 0.37929-0.00007 0.88496 0.99699 0.27014-0.07740
   0   4  -4 1962.29   92.89   1-0.24713-0.48490 0.95173 0.67220-0.18202-0.55946
   0  -4  -4 2160.15  104.39   1-0.80881-0.43154-0.49535-0.60790 0.31693 0.66649
   0  -4   4 2035.50   93.46   1-0.79769-0.56281-0.41823-0.13983 0.43446 0.81467
   0   4   4 1992.13   91.32   1-0.46967-0.84912-0.11006-0.00061 0.87595 0.52818
   0   4  -5 6407.61  316.26   1-0.30621-0.52623 0.92507 0.59662-0.22466-0.60590
   0  -4  -5 6027.99  298.76   1-0.44114-0.04435-0.83765-0.99878-0.32205 0.02173
   0  -4  -5 5660.52  302.59   1-0.80712-0.41207-0.54261-0.70403 0.23262 0.57837
   0  -4   5 6205.96  311.15   1-0.79957-0.58247-0.42655-0.09930 0.42275 0.80676
   0   4   5 6277.71  319.61   1-0.44265-0.84016-0.13836 0.01985 0.88595 0.54196
   0   4  -6 1624.46   86.95   1-0.35672-0.55901 0.89697 0.51958-0.26112-0.64616
   0  -4  -6 1588.11   84.06   1-0.49948-0.08494-0.78606-0.99609-0.36417-0.02420
   0  -4   6 1610.84   85.34   1-0.80167-0.60234-0.43675-0.06064 0.40811 0.79592
   0   4   6 1626.26   86.78   1-0.41589-0.83146-0.16545 0.04154 0.89423 0.55403
   0   4  -7 6904.06   99.41   1-0.39910-0.58365 0.86926 0.44294-0.29171-0.68054
   0  -4  -7 6717.12  152.43   1-0.55079-0.11850-0.73188-0.99081-0.40121-0.06506
   0  -4   7 6874.22  113.29   1-0.80379-0.62224-0.44848-0.02351 0.39085 0.78246
   0   4   7 6933.37  128.04   1-0.38926-0.82288-0.19154 0.06421 0.90099 0.56456
   0   4  -8  891.22   46.26   1-0.43411-0.60106 0.84324 0.36780-0.31698-0.70953
   0  -4  -8  976.12   49.08   1-0.59553-0.14548-0.67632-0.98417-0.43350-0.10118
   0  -4   8  937.56   48.66   1-0.80576-0.64199-0.46147 0.01236 0.37120 0.76661
   0   4   8  988.72   49.40   1-0.36267-0.81435-0.21680 0.08773 0.90634 0.57369
   0   4  -9 1149.22   61.33   1-0.46251-0.61172 0.81986 0.29549-0.33748-0.73380
   0  -4  -9 1185.43   60.79   1-0.63427-0.16647-0.62028-0.97703-0.46146-0.13296
   0  -4   9 1185.48   59.26   1-0.80738-0.66118-0.47530 0.04737 0.34958 0.74872
   0   4   9 1184.74   60.48   1-0.33604-0.80578-0.24133 0.11196 0.91040 0.58153
   0   4 -10 1041.81   52.55   1-0.48522-0.61670 0.79958 0.22626-0.35387-0.75397
   0  -4 -10 1062.48   50.64   1-0.66763-0.18208-0.56436-0.97003-0.48554-0.16087
   0  -4  10 1050.24   52.76   1-0.80855-0.68012-0.49012 0.08142 0.32560 0.72855
   0   4  10 1195.74   56.91   1-0.30931-0.79710-0.26524 0.13683 0.91321 0.58813
   0   4 -11 1729.32   42.27   1-0.50304-0.61679 0.78258 0.16033-0.36674-0.77061
   0  -4 -11 1672.58   39.00   1-0.69621-0.19291-0.50897-0.96355-0.50618-0.18533
   0  -4  11 1761.28   40.28   1-0.80908-0.69843-0.50556 0.11484 0.29963 0.70639
   0   4  11 1766.31   44.52   1-0.28286-0.78832-0.28821 0.16316 0.91483 0.59322
   0   4 -12  554.68   36.23   1-0.51669-0.61270 0.76889 0.09770-0.37659-0.78424
   0  -4 -12  570.57   33.95   1-0.72058-0.19952-0.45434-0.95783-0.52376-0.20674
   0  -4  12  546.83   31.39   1-0.80884-0.71596-0.52147 0.14780 0.27173 0.68230
   0   4  12  546.63   31.99   1-0.25578-0.77926-0.31107 0.18912 0.91531 0.59747
   0   4 -13 1278.88   49.14   1-0.52674-0.60503 0.75841 0.03828-0.38385-0.79527
   0  -4 -13 1307.88   49.15   1-0.74119-0.20238-0.40060-0.95300-0.53864-0.22544
   0  -4  13 1305.31   50.08   1-0.80767-0.73257-0.53770 0.18043 0.24194 0.65633
   0   4  13 1226.43   48.26   1-0.22846-0.76997-0.33346 0.21554 0.91466 0.60056
   0   4 -14  148.92   21.05   1-0.53370-0.59425 0.75096-0.01810-0.38887-0.80407
   0  -4 -14  175.43   20.91   1-0.75848-0.20192-0.34779-0.94909-0.55112-0.24175
   0  -4  14  127.30   16.52   1-0.80544-0.74811-0.55411 0.21289 0.21028 0.62849
   0   4  14  148.38   16.25   1-0.20086-0.76040-0.35542 0.24238 0.91286 0.60252
   0   4 -15  317.36   24.30   1-0.53794-0.58076 0.74632-0.07167-0.39193-0.81091
   0  -4 -15  349.08   25.90   1-0.77280-0.19866-0.29585-0.94617-0.56146-0.25552
   0  -4  15  310.09   21.07   1-0.80198-0.76243-0.57059 0.24527 0.17675 0.59877
   0   4  15  361.71   24.38   1-0.17295-0.75051-0.37699 0.26963 0.90992 0.60334
   0   5   0    3.63   14.05   1 0.11293-0.27274 0.99054 0.88586 0.07788-0.37531
   0  -5   0   -5.23   10.99   1-0.80508-0.42258-0.45669-0.35302 0.37850 0.83474
   0   5   0   -1.31    7.21   1-0.51757-0.90161-0.05730-0.16434 0.85371 0.40011
   0   5   1   97.28   15.53   1 0.18023-0.22318 0.97546 0.91972 0.12646-0.32295
   0   5  -1  103.81   16.91   1 0.04610-0.32183 0.99849 0.84486 0.02964-0.42734
   0  -5   1   86.12   13.81   1-0.80419-0.43947-0.45093-0.29840 0.38719 0.84724
   0  -5  -1   62.10    9.87   1-0.80641-0.40613-0.46654-0.41173 0.36335 0.81580
   0   5   1   84.84   11.16   1-0.49777-0.89986-0.07954-0.13781 0.86365 0.41382
   0   5  -1   82.22   10.55   1-0.53660-0.90261-0.03531-0.19110 0.84309 0.38571
   0   5   2  847.63   30.47   1 0.24651-0.17454 0.95333 0.94650 0.17430-0.27141
   0   5  -2  873.26   31.50   1-0.01880-0.36900 0.99967 0.79709-0.01720-0.47798
   0  -5  -2  963.49   35.85   1-0.80789-0.38963-0.48091-0.47501 0.34062 0.78901
   0  -5   2  848.49   29.45   1-0.80382-0.45687-0.44863-0.24724 0.39063 0.85448
   0   5   2  914.73   34.29   1-0.47734-0.89748-0.10185-0.11135 0.87279 0.42675
   0   5   3    8.01    9.70   1 0.31060-0.12817 0.92459 0.96672 0.22056-0.22139
   0   5  -3   -7.93   14.01   1-0.08048-0.41294 0.99484 0.74329-0.06173-0.52629
   0  -5  -3   11.04   12.09   1-0.80901-0.37297-0.50135-0.54432 0.30681 0.75139
   0  -5   3    7.35   10.08   1-0.80392-0.47476-0.44928-0.19902 0.38966 0.85731
   0   5   3    1.67    9.80   1-0.45634-0.89455-0.12414-0.08487 0.88109 0.43883
   0   5   4  876.92   46.30   1 0.37139-0.08509 0.89001 0.98110 0.26444-0.17375
   0   5  -4  834.19   45.20   1-0.13779-0.45249 0.98508 0.68459-0.10309-0.57146
   0  -5  -4  885.58   46.56   1-0.80844-0.35462-0.52869-0.62052 0.25864 0.69941
   0  -5   4  837.14   43.81   1-0.80443-0.49305-0.45244-0.15332 0.38493 0.85638
   0   5   4  844.72   43.68   1-0.43483-0.89109-0.14636-0.05832 0.88853 0.45004
   0   5  -5 1253.83   42.40   1-0.19001-0.48696 0.97163 0.62220-0.14079-0.61296
   0  -5  -5 1223.14   39.58   1-0.42445 0.04934-0.85072-0.99098-0.31001 0.12451
   0  -5  -5 1001.61   55.64   1-0.80346-0.33187-0.56426-0.70496 0.18984 0.62680
   0  -5   5 1200.57   40.95   1-0.80523-0.51163-0.45774-0.10975 0.37691 0.85216
   0   5   5 1243.74   43.01   1-0.41284-0.88715-0.16848-0.03166 0.89508 0.46037
   0   5  -6  335.95   27.32   1-0.23682-0.51630 0.95573 0.55740-0.17458-0.65018
   0  -5  -6  304.15   24.36   1-0.47680 0.01474-0.80727-0.99644-0.34780 0.08289
   0  -5   6  314.01   25.15   1-0.80620-0.53037-0.46486-0.06801 0.36597 0.84503
   0   5   6  373.96   26.36   1-0.39038-0.88275-0.19046-0.00488 0.90073 0.46980
   0   5  -7  148.87   19.97   1-0.27789-0.53963 0.93865 0.49138-0.20422-0.68362
   0  -5  -7  168.32   14.82   1-0.52448-0.01518-0.76080-0.99888-0.38221 0.04465
   0  -5   7  165.13   16.85   1-0.80718-0.54889-0.47333-0.02765 0.35271 0.83543
   0   5   7  169.40   19.89   1-0.36747-0.87790-0.21230 0.02205 0.90548 0.47833
   0   5  -8   44.82   17.30   1-0.31345-0.55745 0.92135 0.42515-0.22989-0.71308
   0  -5  -8   54.42   13.02   1-0.56750-0.04044-0.71214-0.99913-0.41327 0.00978
   0  -5   8   64.88   17.85   1-0.80809-0.56757-0.48333 0.01121 0.33671 0.82324
   0   5   8   53.53   14.43   1-0.34412-0.87261-0.23397 0.04915 0.90930 0.48593
   0   5  -9  141.49   17.59   1-0.34378-0.57004 0.90466 0.35953-0.25178-0.73877
   0  -5  -9  153.76   16.53   1-0.60600-0.06119-0.66198-0.99788-0.44106-0.02183
   0  -5   9  132.70   16.72   1-0.80877-0.58603-0.49443 0.04897 0.31846 0.80880
   0   5   9  152.51   16.43   1-0.32033-0.86688-0.25546 0.07642 0.91220 0.49261
   0   5 -10   37.77   15.08   1-0.36926-0.57778 0.88918 0.29511-0.27017-0.76096
   0  -5 -10   19.60   13.77   1-0.64021-0.07765-0.61089-0.99570-0.46575-0.05035
   0  -5  10   29.98   14.37   1-0.80909-0.60412-0.50646 0.08581 0.29809 0.79225
   0   5  10   30.08   14.84   1-0.29655-0.86079-0.27640 0.10478 0.91414 0.49805
   0   5 -11  456.51   29.75   1-0.39031-0.58110 0.87533 0.23233-0.28537-0.77995
   0  -5 -11  466.37   28.91   1-0.67041-0.09010-0.55931-0.99303-0.48755-0.07597
   0  -5  11  433.25   27.52   1-0.80892-0.62173-0.51924 0.12189 0.27571 0.77368
   0   5  11  494.14   27.34   1-0.27191-0.85417-0.29754 0.13246 0.91516 0.50283
   0   5 -12  154.01   20.89   1-0.40736-0.58041 0.86338 0.17145-0.29768-0.79606
   0  -5 -12  140.29   16.79   1-0.69690-0.09884-0.50754-0.99017-0.50667-0.09892
   0  -5  12  157.09   20.84   1-0.80814-0.63872-0.53263 0.15736 0.25138 0.75317
   0   5  12  156.73   24.14   1-0.24682-0.84711-0.31848 0.16032 0.91522 0.50665
   0   5 -13  217.16   21.51   1-0.42081-0.57612 0.85348 0.11261-0.30738-0.80956
   0  -5 -13  226.44   22.02   1-0.71996-0.10414-0.45583-0.98736-0.52332-0.11939
   0  -5  13  226.25   20.86   1-0.80661-0.65497-0.54650 0.19235 0.22516 0.73075
   0   5  13  257.73   26.06   1-0.22129-0.83960-0.33923 0.18839 0.91430 0.50948
   0   6   0   85.63   14.18   1 0.16580-0.29700 0.97930 0.85368 0.11604-0.42779
   0  -6   0  100.98   14.78   1-0.80893-0.34967-0.49846-0.37411 0.31170 0.85893
   0   6   1    5.37   12.91   1 0.22097-0.25950 0.96274 0.88600 0.15586-0.38425
   0   6  -1    7.05   12.72   1 0.11096-0.33411 0.99087 0.81630 0.07646-0.47117
   0  -6  -1    2.43   12.87   1-0.80910-0.33207-0.50850-0.43301 0.29457 0.83799
   0  -6   1    6.48   17.57   1-0.80864-0.36715-0.49178-0.31856 0.32286 0.87390
   0   6   2 1248.23   60.74   1 0.27574-0.22244 0.94116 0.91338 0.19540-0.34096
   0   6  -2 1305.14   63.58   1 0.05735-0.36998 0.99764 0.77412 0.03776-0.51365
   0  -6  -2 1256.94   63.98   1-0.80880-0.31399-0.52237-0.49575 0.27011 0.80971
   0  -6   2 1377.54   66.56   1-0.80842-0.38471-0.48804-0.26596 0.32903 0.88388
   0   6   2 1240.86   62.41   1-0.41619-0.91314-0.16515-0.19605 0.89415 0.35738
   0   6   3   18.98   17.64   1 0.32925-0.18664 0.91477 0.93595 0.23403-0.29857
   0   6  -3   16.90   12.50   1 0.00578-0.40380 0.99998 0.72751 0.00054-0.55466
   0  -6  -3   20.20   12.29   1-0.80735-0.29477-0.54063-0.56287 0.23640 0.77219
   0  -6   3   16.00   11.33   1-0.80834-0.40241-0.48686-0.21591 0.33096 0.88963
   0   6   3   23.97   13.78   1-0.40191-0.91692-0.17925-0.16138 0.89796 0.36497
   0   6   4 1159.55   36.14   1 0.38083-0.15278 0.88396 0.95409 0.27125-0.25759
   0   6  -4 1150.66   36.82   1-0.04304-0.43489 0.99847 0.67703-0.03470-0.59370
   0  -6   4 1092.85   30.81   1-0.80841-0.42025-0.48793-0.16812 0.32921 0.89169
   0   6   4 1069.55   31.38   1-0.38610-0.91917-0.19458-0.12794 0.90169 0.37249
   0   6  -5   -0.42   13.45   1-0.08853-0.46263 0.99378 0.62340-0.06754-0.63034
   0  -6  -5   10.41   16.38   1-0.42614 0.12466-0.84943-0.96884-0.31123 0.21402
   0  -6   5    8.96   16.51   1-0.80860-0.43821-0.49096-0.12229 0.32421 0.89051
   0   6   5    8.86   15.51   1-0.36902-0.92014-0.21083-0.09543 0.90518 0.37976
   0   6  -6  863.51   43.41   1-0.13031-0.48664 0.98664 0.56733-0.09769-0.66430
   0  -6  -6  764.99   39.15   1-0.47239 0.09615-0.81121-0.97953-0.34462 0.17680
   0  -6   6  908.16   44.29   1-0.80882-0.45621-0.49571-0.07817 0.31631 0.88642
   0   6   6  866.68   44.24   1-0.35084-0.92002-0.22779-0.06361 0.90830 0.38665
   0   6  -7   86.67   20.58   1-0.16813-0.50671 0.97780 0.50955-0.12499-0.69540
   0  -6  -7   74.61   14.12   1-0.51549 0.07081-0.77012-0.98734-0.37573 0.14187
   0  -6   7   69.01   12.55   1-0.80902-0.47419-0.50196-0.03556 0.30578 0.87970
   0   6   7  105.58   15.46   1-0.33169-0.91893-0.24527-0.03232 0.91094 0.39307
   0   6  -8  614.48   31.60   1-0.20190-0.52272 0.96794 0.45076-0.14936-0.72358
   0  -6  -8  651.91   30.26   1-0.55529 0.04876-0.72667-0.99281-0.40446 0.10932
   0  -6   8  578.43   30.88   1-0.80910-0.49204-0.50951 0.00575 0.29281 0.87055
   0   6   8  645.97   31.57   1-0.31168-0.91698-0.26315-0.00143 0.91301 0.39892
   0   6  -9    2.53   15.49   1-0.23177-0.53521 0.95763 0.39155-0.17093-0.74848
   0  -6  -9    8.78   16.57   1-0.59175 0.03005-0.68136-0.99640-0.43077 0.07917
   0  -6   9  -12.28   17.74   1-0.80896-0.50967-0.51819 0.04594 0.27759 0.85913
   0   6   9  -12.52   22.55   1-0.29131-0.91431-0.28095 0.03005 0.91444 0.40387
   0   6 -10 1111.98   51.00   1-0.25758-0.54328 0.94748 0.33246-0.18956-0.77091
   0  -6 -10 1136.38   49.91   1-0.62490 0.01466-0.63461-0.99856-0.45470 0.05142
   0  -6  10 1092.77   50.24   1-0.80850-0.52699-0.52782 0.08516 0.26023 0.84559
   0   6  10 1202.33   53.72   1-0.26976-0.91079-0.29935 0.06045 0.91521 0.40840
   0   7   0    3.32   13.57   1 0.21930-0.32058 0.96332 0.81667 0.15466-0.47986
   0  -7   0   -5.30   13.46   1-0.80755-0.27174-0.53891-0.39383 0.23966 0.87809
   0   7   1   13.20   18.49   1 0.26566-0.29193 0.94553 0.84784 0.18812-0.44264
   0   7  -1    9.60   17.23   1 0.17336-0.34884 0.97733 0.78182 0.12150-0.51677
   0  -7  -1    2.03   15.19   1-0.80627-0.25269-0.54891-0.45270 0.22048 0.85510
   0  -7   1   15.48   15.56   1-0.80822-0.29019-0.53169-0.33774 0.25313 0.89538
   0   7   2  217.55   22.31   1 0.31180-0.26350 0.92398 0.87525 0.22143-0.40557
   0   7  -2  203.71   25.31   1 0.12823-0.37623 0.98774 0.74329 0.08892-0.55313
   0  -7   2  211.11   23.29   1-0.80855-0.30830-0.52697-0.28416 0.26179 0.90785
   0   7   3   62.13   20.92   1 0.35720-0.23581 0.89876 0.89899 0.25420-0.36904
   0   7  -3   44.99   19.83   1 0.08451-0.40221 0.99476 0.70136 0.05737-0.58847
   0  -7   3   43.21   19.43   1-0.80870-0.32622-0.52448-0.23281 0.26630 0.91617
   0   7   4   11.26   12.99   1 0.40137-0.20939 0.87008 0.91924 0.28608-0.33339
   0   7  -4   15.42   17.28   1 0.04269-0.42629 0.99871 0.65636 0.02718-0.62245
   0  -7   4   16.70   14.63   1-0.80872-0.34402-0.52400-0.18346 0.26717 0.92086
   0   7  -5   36.32   15.64   1 0.00318-0.44807 0.99999 0.60869-0.00133-0.65476
   0  -7  -5   52.16   18.57   1-0.44015 0.18765-0.83845-0.93700-0.32134 0.29463
   0  -7   5   31.22   17.04   1-0.80865-0.36172-0.52530-0.13590 0.26482 0.92232
   0   7  -6   -3.38   15.26   1-0.03370-0.46718 0.99904 0.55878-0.02796-0.68519
   0  -7  -6    9.76   17.07   1-0.48085 0.16471-0.80360-0.95106-0.35072 0.26143
   0  -7   6   -0.23   17.03   1-0.80847-0.37932-0.52819-0.08992 0.25957 0.92088
   0   7  -7  121.75   26.71   1-0.06768-0.48341 0.99632 0.50713-0.05249-0.71353
   0  -7  -7  128.36   24.69   1-0.51935 0.14396-0.76615-0.96252-0.37851 0.22981
   0  -7   7  125.44   19.46   1-0.80815-0.39678-0.53248-0.04535 0.25166 0.91679
   1   0 -17   17.64   16.93   1-0.78819-0.44465 0.22561-0.58597-0.57257-0.67742
  -1   0  17   16.85   13.90   1 0.09422-0.25415-0.55248 0.25669 0.82817 0.93247
   1   0 -16   -4.48   13.45   1-0.79353-0.46772 0.19501-0.56765-0.57642-0.67749
  -1   0  16   -0.43   15.92   1 0.07033-0.26001-0.53902 0.22134 0.83934 0.93989
   1   0 -15 1293.80   59.48   1-0.79805-0.48996 0.16452-0.54921-0.57968-0.67697
  -1   0  15 1274.13   60.14   1 0.04735-0.26497-0.52566 0.18589 0.84937 0.94616
   1   0 -14   -0.78   14.57   1-0.80178-0.51141 0.13410-0.53069-0.58237-0.67587
  -1   0  14    4.00   12.64   1 0.02534-0.26896-0.51248 0.15026 0.85832 0.95135
   1   0 -13  963.81   55.01   1-0.80473-0.53209 0.10372-0.51215-0.58450-0.67422
  -1   0  13 1040.89   55.08   1 0.00442-0.27187-0.49961 0.11432 0.86623 0.95551
   1   0 -12   -5.52   14.14   1-0.80692-0.55200 0.07331-0.49363-0.58608-0.67202
  -1   0  12    3.73    8.32   1-0.73981-0.99483-0.66785-0.10136-0.08146 0.00530
  -1   0  12   -0.57   11.60   1-0.01528-0.27356-0.48718 0.07794 0.87316 0.95869
   1   0 -11    1.93    9.87   1-0.80836-0.57117 0.04280-0.47521-0.58712-0.66927
  -1   0  11   16.87    7.29   1-0.75217-0.98947-0.65739-0.13981-0.04549 0.03739
  -1   0  11    3.43    7.84   1-0.03357-0.27383-0.47538 0.04093 0.87913 0.96090
   1   0 -10    0.81   10.49   1-0.80904-0.58958 0.01208-0.45700-0.58762-0.66598
  -1   0  10   -6.22    7.56   1-0.76216-0.98174-0.64724-0.17857-0.01349 0.06551
  -1   0  10    2.44    7.35   1-0.05015-0.27239-0.46447 0.00303 0.88416 0.96218
   1   0  -9 3396.51  125.01   1-0.80895-0.60722-0.01898-0.43915-0.58755-0.66213
  -1   0   9 3053.72  154.78   1-0.76997-0.97183-0.63791-0.21816 0.01393 0.08907
  -1   0   9 3367.87  122.83   1-0.06460-0.26881-0.45478-0.03608 0.88825 0.96251
   1   0  -8  -21.16   17.61   1-0.80806-0.62405-0.05063-0.42187-0.58691-0.65771
  -1   0   8    4.15    7.32   1-0.77572-0.95986-0.63005-0.25921 0.03584 0.10710
  -1   0   8   -2.13    6.72   1-0.07629-0.26248-0.44683-0.07694 0.89135 0.96186
   1   0  -7 7625.95  256.49   1-0.80628-0.63990-0.08334-0.40557-0.58562-0.65271
  -1   0   7 6916.69  277.24   1-0.77935-0.94577-0.62452-0.30260 0.05067 0.11805
  -1   0   7 7640.34  272.76   1-0.08424-0.25241-0.44137-0.12029 0.89336 0.96011
   1   0  -6   -4.58    8.59   1-0.80349-0.65484-0.11745-0.39076-0.58361-0.64690
  -1   0   6    4.15    6.39   1-0.78058-0.92928-0.62254-0.34953 0.05587 0.11938
  -1   0   6    3.26    7.05   1-0.08684-0.23700-0.43957-0.16730 0.89399 0.95699
   1   0  -5  580.91   28.13   1-0.79940-0.66850-0.15417-0.37855-0.58066-0.64015
  -1   0   5  428.24   27.09   1-0.77852-0.90950-0.62584-0.40174 0.04718 0.10681
  -1   0   5  579.60   28.88   1-0.08132-0.21346-0.44338-0.21992 0.89263 0.95187
   1   0  -4   -3.71    7.49   1-0.79341-0.68024-0.19575-0.37121-0.57634-0.63203
  -1   0   4    2.78    5.62   1-0.77081-0.88407-0.63683-0.46165 0.01701 0.07276
  -1   0   4    2.46    8.74   1-0.06245-0.17657-0.45623-0.28158 0.88766 0.94314
   1   0  -3 2772.03  101.80   1-0.78382-0.68839-0.24774-0.37428-0.56941-0.62131
  -1   0   3 2151.04  124.27   1-0.75116-0.84670-0.65833-0.53205-0.04858 0.00328
  -1   0   3 2847.37  117.59   1-0.01938-0.11548-0.48456-0.35872 0.87454 0.92627
   1   0  -2   -6.92   11.66   1-0.76415-0.68646-0.32832-0.40594-0.55521-0.60331
  -1   0   2   -3.13   11.51   1-0.70154-0.77950-0.69054-0.61324-0.17602-0.12770
  -1   0   2   -1.21    7.43   1 0.07326-0.00480-0.54070-0.46366 0.83801 0.88599
   1   0   0    1.55    3.21   1-0.74913-0.70694 0.37741 0.39759-0.54437-0.58492
   1   0   0    2.81    8.22   1-0.34481-0.30256-0.67072-0.65011-0.65667-0.69699
  -1   0   0    8.77    9.71   1-0.29854-0.34079-0.65422-0.67483-0.69488-0.65456
  -1   0   0   -1.31    5.18   1-0.62059-0.66267 0.71160 0.69097-0.32934-0.28884
   1   0   0    3.87    7.53   1-0.65380-0.61173 0.70612 0.72675-0.27191-0.31241
  -1   0  -2    2.37    7.42   1-0.80793-0.81468-0.05375-0.17180-0.58681-0.55386
  -1   0  -2    7.52   14.82   1 0.38695 0.38035-0.20122-0.31971-0.89987-0.86782
   1   0   2   -0.62    5.41   1-0.68635-0.68042 0.16769 0.28583 0.70766 0.67476
  -1   0  -3 1362.58   54.72   1-0.80716-0.79619-0.06904-0.23602-0.58626-0.55709
   1   0   3 1212.35   46.36   1-0.54741-0.55829 0.02253 0.18947 0.83656 0.80772
   1   0   3 1282.31   50.53   1-0.57749-0.58958 0.01425 0.18117 0.81627 0.78712
  -1   0  -4    4.07    9.12   1-0.80739-0.77869-0.06489-0.28081-0.58643-0.56104
   1   0   4    0.59    5.01   1-0.64864-0.67731-0.11003 0.10576 0.75309 0.72804
   1   0   4   -0.39    6.33   1-0.49788-0.52802-0.07942 0.13626 0.86360 0.83822
  -1   0  -5 5592.75  202.75   1-0.80800-0.76158-0.05212-0.31696-0.58686-0.56526
   1   0   5 5567.04  192.63   1-0.43660-0.48480-0.14456 0.11989 0.88796 0.86636
  -1   0  -6   -6.10    9.73   1-0.80861-0.74447-0.03471-0.34848-0.58731-0.56949
   1   0   6   -0.54    4.90   1-0.74984-0.81411-0.28425 0.02925 0.59743 0.57996
   1   0   6    1.90    7.95   1-0.38616-0.45242-0.19452 0.11870 0.90168 0.88386
  -1   0  -8   -8.54    9.03   1-0.80908-0.70948 0.00759-0.40403-0.58764-0.57739
   1   0   8    1.01    6.78   1-0.79285-0.89260-0.39916 0.01211 0.46049 0.45067
   1   0   8   -7.50    8.83   1-0.30321-0.40537-0.27059 0.14050 0.91369 0.90328
  -1   0  -9 2275.99   84.11   1-0.80871-0.69139 0.03100-0.42954-0.58738-0.58091
   1   0   9 2333.32   85.72   1-0.80321-0.92075-0.44510 0.01502 0.39588 0.38985
   1   0   9 2184.27   81.80   1-0.26649-0.38667-0.30211 0.15780 0.91526 0.90861
  -1   0 -10    1.08   12.73   1-0.80785-0.67281 0.05542-0.45406-0.58676-0.58408
   1   0  10    2.62    7.71   1-0.80828-0.94358-0.48595 0.02308 0.33245 0.33032
   1   0  10    7.26   10.52   1-0.23166-0.36987-0.33087 0.17785 0.91479 0.91190
  -1   0 -11 1629.40   87.82   1-0.80646-0.65369 0.08062-0.47778-0.58575-0.58686
   1   0  11 1560.08   88.68   1-0.80879-0.96186-0.52267 0.03522 0.26956 0.27125
   1   0  11 1692.15   90.81   1-0.19811-0.35435-0.35758 0.19995 0.91262 0.91348
  -1   0 -12   -7.27   13.24   1-0.80449-0.63399 0.10648-0.50086-0.58433-0.58922
   1   0  12   -0.84    7.46   1-0.80510-0.97595-0.55602 0.05073 0.20648 0.21198
   1   0  12   -3.23   13.50   1-0.16543-0.33969-0.38269 0.22365 0.90894 0.91355
  -1   0 -13 2186.11  104.39   1-0.80191-0.61368 0.13288-0.52338-0.58247-0.59114
   1   0  13 2337.14  110.59   1-0.13332-0.32560-0.40652 0.24863 0.90386 0.91222
  -1   0 -14   -2.28   17.24   1-0.79868-0.59273 0.15977-0.54542-0.58014-0.59260
   1   0  14   -5.92   15.23   1-0.10155-0.31186-0.42929 0.27466 0.89743 0.90956
  -1   0 -15 1667.27   74.61   1-0.79478-0.57110 0.18711-0.56702-0.57732-0.59356
   1   0  15 1619.93   73.24   1-0.07001-0.29828-0.45111 0.30161 0.88971 0.90556
  -1   0 -16    3.69   14.78   1-0.79017-0.54876 0.21484-0.58821-0.57399-0.59402
   1   0  16   -0.56   17.46   1-0.03844-0.28472-0.47220 0.32933 0.88064 0.90025
  -1   0 -17  353.67   29.06   1-0.78480-0.52567 0.24297-0.60901-0.57012-0.59393
   1   0  17  301.02   22.66   1-0.00677-0.27107-0.49259 0.35776 0.87023 0.89360
   1   1 -17   50.29   18.48   1-0.75172-0.48533 0.36950-0.46307-0.54624-0.74162
   1  -1 -17   69.68   18.64   1-0.80587-0.38527 0.08914-0.70154-0.58533-0.59950
  -1  -1  17   48.70   16.00   1 0.19051-0.08108-0.60220 0.22836 0.77528 0.97019
  -1   1  17   57.69   16.33   1 0.02311-0.40208-0.51112 0.27666 0.85919 0.87280
   1   1 -16 1232.19   77.08   1-0.75817-0.50951 0.34882-0.43482-0.55090-0.74251
   1  -1 -16 1249.04   80.23   1-0.80810-0.40522 0.04966-0.69209-0.58694-0.59732
  -1  -1  16 1232.64   80.40   1 0.17062-0.08294-0.59254 0.18921 0.78726 0.97842
  -1   1  16 1274.95   80.37   1-0.00299-0.41017-0.49497 0.24400 0.86890 0.87875
   1   1 -15  434.26   30.65   1-0.76383-0.53289 0.32945-0.40526-0.55498-0.74282
   1  -1 -15  478.30   32.21   1-0.80906-0.42391 0.00932-0.68350-0.58763-0.59423
  -1  -1  15  428.68   27.30   1 0.15227-0.08327-0.58334 0.14959 0.79782 0.98523
  -1   1  15  448.77   32.31   1-0.02852-0.41769-0.47867 0.21149 0.87752 0.88363
   1   1 -14 2909.32  126.65   1-0.76872-0.55551 0.31163-0.37415-0.55851-0.74257
   1  -1 -14 2963.98  131.03   1-0.80868-0.44125-0.03210-0.67600-0.58736-0.59017
  -1  -1  14 2764.97  130.62   1-0.76714-0.98093-0.64146 0.04340 0.00371 0.18943
  -1  -1  14 3010.48  130.61   1 0.13568-0.08184-0.57479 0.10933 0.80696 0.99062
  -1   1  14 2904.07  126.81   1-0.05348-0.42462-0.46225 0.17910 0.88513 0.88747
   1   1 -13  685.30   40.45   1-0.77284-0.57727 0.29569-0.34109-0.56149-0.74189
   1  -1 -13  684.03   39.99   1-0.80682-0.45699-0.07499-0.66987-0.58601-0.58516
  -1  -1  13  647.68   49.50   1-0.77790-0.97397-0.62679 0.00915 0.04464 0.22649
  -1  -1  13  689.22   38.88   1 0.12122-0.07823-0.56716 0.06815 0.81463 0.99460
  -1   1  13  655.98   37.89   1-0.07785-0.43097-0.44577 0.14677 0.89175 0.89034
   1   1 -12   23.40   10.41   1-0.77620-0.59835 0.28195-0.30589-0.56391-0.74053
   1  -1 -12   27.14   14.07   1-0.80328-0.47119-0.11958-0.66554-0.58346-0.57881
  -1  -1  12   26.08   10.89   1-0.78662-0.96497-0.61179-0.02475 0.08320 0.26118
  -1  -1  12   26.21   11.59   1 0.10911-0.07233-0.56065 0.02586 0.82083 0.99704
  -1   1  12   23.23   11.98   1-0.10167-0.43680-0.42921 0.11449 0.89746 0.89223
   1   1 -11   77.35   13.33   1-0.77875-0.61863 0.27102-0.26789-0.56575-0.73859
   1  -1 -11   58.43   10.98   1-0.79779-0.48344-0.16642-0.66346-0.57950-0.57105
  -1  -1  11   51.91   11.05   1-0.79331-0.95473-0.59726-0.05942 0.11803 0.29144
  -1  -1  11   59.47   12.94   1 0.09999-0.06342-0.55567-0.01796 0.82536 0.99782
  -1   1  11   49.35   13.75   1-0.12479-0.44189-0.41271 0.08218 0.90227 0.89329
   1   1 -10 3751.74  168.25   1-0.78041-0.63801 0.26365-0.22633-0.56695-0.73600
   1  -1 -10 3538.65  155.08   1-0.78993-0.49331-0.21616-0.66427-0.57382-0.56158
  -1  -1  10 3566.85  165.40   1-0.79869-0.94235-0.58228-0.09330 0.15175 0.32135
  -1  -1  10 3847.17  170.73   1 0.09466-0.05073-0.55273-0.06383 0.82796 0.99667
  -1   1  10 3689.66  163.76   1-0.14721-0.44629-0.39631 0.04977 0.90623 0.89350
   1   1  -9 1697.76   69.09   1-0.78101-0.65633 0.26095-0.18011-0.56738-0.73265
   1  -1  -9 1622.15   60.84   1-0.77906-0.50018-0.26967-0.66886-0.56597-0.54993
  -1  -1   9 1714.37   67.84   1-0.80268-0.92856-0.56770-0.12759 0.18276 0.34854
  -1  -1   9 1726.59   65.24   1 0.09426-0.03311-0.55251-0.11242 0.82815 0.99310
  -1   1   9 1760.11   69.22   1-0.16884-0.44990-0.38011 0.01716 0.90939 0.89291
   1   1  -8 6500.14  198.00   1-0.78022-0.67327 0.26453-0.12760-0.56681-0.72829
   1  -1  -8 6421.00  218.06   1-0.76420-0.50305-0.32816-0.67843-0.55525-0.53540
  -1   1   8 5095.69  231.97   1-0.55805-0.82001-0.71371-0.36366-0.42329-0.44196
  -1  -1   8 6748.75  221.25   1-0.80548-0.91358-0.55388-0.16263 0.21073 0.37270
  -1  -1   8 6392.08  219.12   1 0.10050-0.00885-0.55595-0.16467 0.82511 0.98630
  -1   1   8 6275.21  193.16   1-0.18957-0.45261-0.36422-0.01575 0.91181 0.89156
   1   1  -7 2130.77   84.95   1-0.77741-0.68819 0.27684-0.06636-0.56478-0.72248
   1  -1  -7 2156.35   78.03   1-0.74375-0.50026-0.39332-0.69456-0.54049-0.51702
  -1   1   7 1453.98  127.75   1-0.52563-0.76972-0.71152-0.41036-0.46630-0.48899
  -1  -1   7 2100.49   82.48   1-0.80728-0.89761-0.54126-0.19887 0.23520 0.39335
  -1  -1   7 2232.20   82.06   1 0.11603 0.02469-0.56439-0.22192 0.81731 0.97475
  -1   1   7 2196.10   82.64   1-0.20921-0.45422-0.34885-0.04919 0.91352 0.88953
   1   1  -6 2486.15   90.72   1-0.77130-0.69987 0.30177 0.00743-0.56037-0.71422
   1  -1  -6 2418.15   87.05   1-0.71511-0.48937-0.46733-0.71967-0.51981-0.49252
  -1   1   6 1950.32   76.34   1-0.46438-0.69063-0.70256-0.45030-0.53920-0.56590
  -1  -1   6 2454.42   88.26   1-0.80831-0.88087-0.53043-0.23691 0.25544 0.40979
  -1  -1   6 2573.62  100.40   1 0.14493 0.07159-0.57959-0.28592 0.80191 0.95557
  -1   1   6 2305.55   84.91   1-0.22745-0.45443-0.33427-0.08342 0.91461 0.88686
   1   1  -5 1609.10   61.31   1-0.75912-0.70542 0.34564 0.10024-0.55158-0.70166
   1  -1  -5 1603.49   61.86   1-0.67368-0.46569-0.55329-0.75672-0.48991-0.45879
  -1   1   5 1230.68   69.30   1-0.35578-0.56441-0.67432-0.47121-0.64706-0.67778
  -1  -1   5 1631.26   64.68   1-0.80881-0.86359-0.52222-0.27756 0.27038 0.42091
  -1  -1   5 1673.48   65.14   1 0.19418 0.13886-0.60395-0.35909 0.77300 0.92291
  -1   1   5 1605.15   62.92   1-0.24380-0.45276-0.32097-0.11892 0.91517 0.88366
   1   1  -4 2829.87  103.87   1-0.73450-0.69852 0.41896 0.22249-0.53381-0.68011
   1  -1  -4 2840.94   97.79   1-0.61116-0.42093-0.65469-0.80922-0.44479-0.40984
  -1   1   4 2391.38  185.49   1-0.19045-0.38117-0.60795-0.45372-0.77078-0.80550
  -1  -1   4 2885.89  104.32   1-0.80897-0.84598-0.51779-0.32200 0.27828 0.42500
  -1  -1   4 2947.51  111.71   1 0.27452 0.23722-0.63931-0.44326 0.71827 0.86443
  -1   1   4 2742.79  102.62   1-0.25739-0.44833-0.30972-0.15649 0.91532 0.88006
   1   1  -3 3344.00  124.27   1-0.68166-0.66349 0.53818 0.39056-0.49567-0.63814
   1  -1  -3 3271.21  113.79   1-0.51243-0.33995-0.77323-0.87884-0.37351-0.33475
  -1   1   3 2872.23  301.61   1 0.01878-0.15405-0.49129-0.38602-0.87079-0.90953
  -1  -1   3 3557.33  122.66   1-0.80894-0.82817-0.51888-0.37195 0.27635 0.41926
  -1   1   3 3114.54  119.13   1-0.26655-0.43946-0.30206-0.19763 0.91526 0.87624
  -1   1   1 1118.77   46.75   1 0.10795-0.02908 0.99137 0.99918 0.07429 0.02799
   1   1  -1 1123.59   45.34   1-0.30529-0.32259 0.92553 0.87583-0.22400-0.35894
  -1  -1   1 1148.68   49.15   1-0.80619-0.78987-0.54942-0.50022 0.21950 0.35478
  -1   1   1 1032.00   42.53   1-0.25033-0.38719-0.31559-0.30878 0.91527 0.86875
   1   1  -1 1226.25   46.87   1-0.74208-0.75874 0.66608 0.61656-0.07512-0.21013
   1   1   0   32.26    8.54   1 0.06911 0.03414 0.99653 0.99580 0.04625-0.08493
  -1   1   0   24.14    9.39   1-0.19628-0.31558 0.96971 0.92856-0.14531-0.19539
  -1  -1   0   28.48    8.16   1-0.79662-0.76252-0.58853-0.58819 0.13794 0.26940
   1  -1   0   24.32    6.45   1-0.48404-0.36510 0.09460 0.13572 0.86991 0.92102
  -1   1   0   41.14   11.35   1-0.17488-0.29371-0.37552-0.41753 0.91016 0.85988
   1  -1   0   24.75    8.80   1-0.39080-0.27191-0.19005-0.14803 0.90063 0.95086
   1   1   0   29.94    8.34   1-0.80902-0.84377 0.51594 0.51519 0.28157 0.15038
   1   1   1  735.68   33.02   1 0.37306 0.32039 0.88896 0.93714 0.26565 0.13821
  -1   1  -1  689.60   32.59   1-0.45355-0.55517 0.82747 0.73737-0.33102-0.38478
  -1  -1  -1  663.60   32.55   1-0.75923-0.70722-0.65040-0.69923-0.02319 0.10437
   1  -1   1  715.59   31.04   1-0.56068-0.45953 0.00652 0.09650 0.82800 0.88289
   1  -1   1  679.79   30.49   1-0.49363-0.39280-0.08411 0.00667 0.86559 0.91959
   1   1   1  707.93   31.50   1-0.77394-0.82677 0.34131 0.38933 0.53339 0.40602
  -1   1  -3 3986.95  148.33   1-0.68973-0.75585 0.52226 0.33436-0.50150-0.56292
  -1  -1  -3 4277.57  144.94   1-0.63739-0.54934-0.61537-0.76151-0.46371-0.34397
   1  -1   3 4689.99  157.24   1-0.66218-0.59662-0.13005 0.05763 0.73796 0.80044
   1   1   3 4530.06  151.51   1-0.63647-0.72537 0.09259 0.23811 0.76572 0.64585
  -1   1  -4 2618.11   95.04   1-0.73108-0.77948 0.42801 0.19117-0.53134-0.59654
  -1  -1  -4 2577.36   95.17   1-0.69330-0.58750-0.51501-0.71005-0.50407-0.38815
   1  -1   4 2558.32   98.03   1-0.69723-0.64947-0.18557 0.05097 0.69240 0.75867
   1  -1   4 2685.40  101.84   1-0.21960-0.17287-0.34058-0.10333 0.91420 0.97950
   1   1   4 2518.42   91.65   1-0.57492-0.68188 0.01103 0.20532 0.81813 0.70205
  -1   1  -5 2160.44   83.64   1-0.75292-0.78360 0.36573 0.07996-0.54711-0.61608
  -1  -1  -5 2222.25   81.83   1-0.72891-0.60536-0.43359-0.67754-0.52978-0.41769
   1  -1   5 2281.83   83.88   1-0.72545-0.69549-0.23546 0.04994 0.64673 0.71679
   1  -1   5 2230.29   83.05   1-0.20428-0.17557-0.35273-0.06668 0.91314 0.98220
   1   1   5 2126.72   80.55   1-0.52067-0.64569-0.05376 0.18929 0.85206 0.73976
  -1   1  -6 1616.49   64.96   1-0.76483-0.77779 0.32589-0.00880-0.55571-0.62846
  -1  -1  -6 1642.15   62.43   1-0.75311-0.61180-0.36516-0.65802-0.54724-0.43897
   1  -1   6 1675.54   64.21   1-0.74833-0.73616-0.28101 0.05325 0.60085 0.67470
   1  -1   6 1657.96   66.83   1-0.18499-0.17431-0.36776-0.03290 0.91132 0.98414
   1   1   6 1622.38   61.49   1-0.47227-0.61533-0.10729 0.18453 0.87489 0.76635
  -1   1  -7   60.77   12.37   1-0.77133-0.76655 0.30167-0.08195-0.56039-0.63692
  -1  -1  -7   56.62   11.77   1-0.77029-0.61133-0.30566-0.64748-0.55965-0.45501
   1   1   7   42.67    7.16   1-0.80910-0.96762-0.50892-0.16720 0.29384 0.18907
   1  -1   7   60.31    9.61   1-0.76670-0.77217-0.32285 0.06028 0.55491 0.63253
   1  -1   7   52.50    9.92   1-0.16368-0.17101-0.38401-0.00034 0.90870 0.98526
   1   1   7   60.72   10.54   1-0.42817-0.58929-0.15313 0.18746 0.89062 0.78587
  -1   1  -8 4231.19  145.81   1-0.77459-0.75206 0.28863-0.14390-0.56275-0.64319
  -1  -1  -8 4133.12  129.72   1-0.78284-0.60613-0.25245-0.64318-0.56870-0.46787
   1  -1   8 3945.65  142.74   1-0.78143-0.80469-0.36214 0.06986 0.50814 0.58956
   1  -1   8 4279.41  141.05   1-0.14109-0.16645-0.40083 0.03165 0.90522 0.98554
   1   1   8 4307.20  142.50   1-0.38728-0.56646-0.19344 0.19592 0.90143 0.80045
  -1   1  -9   66.43   10.53   1-0.77583-0.73557 0.28350-0.19795-0.56365-0.64787
  -1  -1  -9   64.01   12.12   1-0.79209-0.59765-0.20376-0.64342-0.57538-0.47835
   1  -1   9   75.34   10.94   1-0.79281-0.83385-0.39903 0.08183 0.46066 0.54588
   1  -1   9   72.81   10.91   1-0.11757-0.16096-0.41791 0.06338 0.90084 0.98492
   1   1   9   68.52   10.33   1-0.34878-0.54602-0.22968 0.20845 0.90862 0.81141
  -1   1 -10  794.15   41.15   1-0.77562-0.71764 0.28437-0.24602-0.56349-0.65150
  -1  -1 -10  789.14   42.49   1-0.79886-0.58668-0.15840-0.64698-0.58027-0.48704
   1  -1  10  760.49   41.95   1-0.80110-0.85991-0.43384 0.09588 0.41232 0.50135
   1  -1  10  774.09   41.21   1-0.09331-0.15472-0.43507 0.09503 0.89554 0.98337
   1   1  10  796.90   42.60   1-0.31205-0.52734-0.26282 0.22408 0.91298 0.81956
  -1   1 -11  590.62   27.37   1-0.77430-0.69859 0.28981-0.28950-0.56254-0.65433
  -1  -1 -11  601.89   24.73   1-0.80367-0.57375-0.11553-0.65303-0.58374-0.49430
   1  -1  11  688.02   26.09   1-0.80644-0.88297-0.46676 0.11185 0.36301 0.45590
   1  -1  11  609.72   26.67   1-0.06854-0.14789-0.45212 0.12676 0.88931 0.98084
   1   1  11  588.62   27.82   1-0.27696-0.50999-0.29325 0.24290 0.91503 0.82516
  -1   1 -12  297.30   17.72   1-0.77205-0.67861 0.29885-0.32939-0.56091-0.65649
  -1  -1 -12  314.43   19.37   1-0.80684-0.55919-0.07456-0.66098-0.58603-0.50039
   1  -1  12  258.89   16.89   1-0.80891-0.90322-0.49801 0.12947 0.31247 0.40918
   1  -1  12  314.65   18.92   1-0.04302-0.14039-0.46919 0.15849 0.88204 0.97732
   1   1  12  317.92   17.64   1-0.24249-0.49354-0.32204 0.26291 0.91514 0.82902
  -1   1 -13  193.40   20.46   1-0.76898-0.65787 0.31064-0.36657-0.55870-0.65789
  -1  -1 -13  187.01   19.95   1-0.80860-0.54331-0.03507-0.67044-0.58730-0.50528
   1  -1  13  200.67   16.37   1-0.80851-0.92059-0.52763 0.14871 0.26057 0.36109
   1  -1  13  197.59   14.89   1-0.01692-0.13232-0.48613 0.19036 0.87371 0.97275
   1   1  13  207.12   17.19   1-0.20870-0.47778-0.34925 0.28451 0.91348 0.83113
  -1   1 -14 1228.22   60.79   1-0.76512-0.63628 0.32487-0.40127-0.55591-0.65887
  -1  -1 -14 1341.88   64.43   1-0.80910-0.52608 0.00333-0.68096-0.58766-0.50943
   1  -1  14 1179.95   61.43   1-0.80516-0.93501-0.55570 0.16951 0.20712 0.31145
   1  -1  14 1277.31   60.58   1 0.00972-0.12368-0.50290 0.22240 0.86428 0.96707
   1   1  14 1349.39   63.02   1-0.17537-0.46248-0.37514 0.30743 0.91022 0.83161
  -1   1 -15    4.68   19.30   1-0.76049-0.61393 0.34103-0.43404-0.55257-0.65931
  -1  -1 -15    1.91   11.78   1-0.80842-0.50768 0.04086-0.69236-0.58717-0.51272
   1  -1  15   -1.12   11.28   1 0.03694-0.11448-0.51947 0.25465 0.85368 0.96023
   1   1  15   -3.89   12.72   1-0.14235-0.44748-0.39990 0.33148 0.90543 0.83058
  -1   1 -16  263.15   28.16   1-0.75510-0.59082 0.35883-0.46517-0.54868-0.65919
  -1  -1 -16  234.88   21.69   1-0.80665-0.48818 0.07773-0.70442-0.58589-0.51523
   1  -1  16  232.68   22.51   1 0.06474-0.10471-0.53580 0.28712 0.84185 0.95215
   1   1  16  247.64   26.48   1-0.10949-0.43264-0.42368 0.35652 0.89916 0.82807
  -1   1 -17   36.09   26.39   1-0.74893-0.56693 0.37802-0.49491-0.54423-0.65851
  -1  -1 -17   44.02   14.80   1-0.80381-0.46761 0.11409-0.71699-0.58384-0.51696
   1   1  17   39.67   14.81   1-0.07668-0.41782-0.44657 0.38239 0.89145 0.82413
   1   2 -17   15.28   18.99   1-0.69530-0.50602 0.51088-0.34262-0.50551-0.79154
   1  -2 -17   35.29   19.52   1-0.80869-0.31102-0.03164-0.80143-0.58737-0.51085
  -1   2  17   15.77   22.26   1-0.02595-0.52798-0.48033 0.28606 0.87669 0.79962
   1   2 -16  456.45   32.51   1-0.70076-0.52920 0.49938-0.30519-0.50945-0.79170
   1  -2 -16  461.21   27.83   1-0.80665-0.32658-0.07772-0.79849-0.58589-0.50571
  -1   2  16  408.86   28.59   1-0.05295-0.53697-0.46261 0.25497 0.88497 0.80414
   1   2 -15  490.62   26.30   1-0.70502-0.55119 0.49014-0.26550-0.51253-0.79101
   1  -2 -15  516.95   28.32   1-0.80274-0.34041-0.12503-0.79688-0.58306-0.49908
  -1  -2  15  402.00   24.19   1-0.77946-0.93430-0.62435 0.12997 0.05113 0.33194
  -1  -2  15  455.09   27.38   1 0.28903 0.13031-0.64509 0.10925 0.70732 0.98543
  -1   2  15  461.28   27.52   1-0.07949-0.54549-0.44464 0.22414 0.89217 0.80758
   1   2 -14  695.44   29.84   1-0.70800-0.57189 0.48355-0.22316-0.51468-0.78938
   1  -2 -14  707.11   29.05   1-0.79675-0.35216-0.17390-0.79682-0.57874-0.49096
  -1  -2  14  719.06   28.17   1-0.78805-0.92516-0.60896 0.09644 0.09017 0.36710
  -1  -2  14  644.68   27.68   1 0.28056 0.13986-0.64174 0.06379 0.71375 0.98811
  -1   2  14  687.21   27.73   1-0.10570-0.55368-0.42636 0.19358 0.89835 0.80991
   1   2 -13  719.87   38.80   1-0.70955-0.59116 0.48008-0.17770-0.51580-0.78672
   1  -2 -13  671.63   37.44   1-0.78838-0.36153-0.22462-0.79863-0.57270-0.48112
  -1  -2  13  605.15   36.65   1-0.79469-0.91512-0.59378 0.06251 0.12605 0.39829
  -1  -2  13  692.87   37.78   1 0.27557 0.15289-0.63973 0.01698 0.71749 0.98809
  -1   2  13  673.21   35.41   1-0.13140-0.56136-0.40792 0.16321 0.90351 0.81131
   1   2 -12   50.55   15.26   1-0.70943-0.60877 0.48034-0.12851-0.51572-0.78286
   1  -2 -12   58.54   15.94   1-0.77724-0.36813-0.27757-0.80265-0.56466-0.46928
  -1  -2  12   37.81   11.87   1-0.79997-0.90263-0.57803 0.02939 0.16096 0.42939
  -1  -2  12   42.15   11.98   1 0.27481 0.17015-0.63942-0.03151 0.71805 0.98491
  -1   2  12   31.26   13.97   1-0.15670-0.56863-0.38925 0.13307 0.90770 0.81175
   1   2 -11  179.24   17.11   1-0.70729-0.62435 0.48512-0.07479-0.51417-0.77754
   1  -2 -11  198.22   14.95   1-0.76278-0.37140-0.33315-0.80931-0.55422-0.45505
  -1  -2  11  228.77   14.85   1-0.80387-0.88876-0.56235-0.00379 0.19374 0.45835
  -1  -2  11  193.33   16.76   1 0.27928 0.19265-0.64122-0.08211 0.71472 0.97782
  -1   2  11  180.70   17.88   1-0.18162-0.57552-0.37036 0.10315 0.91095 0.81125
   1   2 -10  764.43   44.53   1-0.70260-0.63738 0.49541-0.01557-0.51079-0.77038
   1  -2 -10  774.82   45.67   1-0.74424-0.37049-0.39189-0.81901-0.54084-0.43812
  -1  -2  10  813.50   46.61   1-0.80655-0.87366-0.54695-0.03724 0.22429 0.48509
  -1  -2  10  794.60   46.92   1 0.29035 0.22174-0.64560-0.13530 0.70631 0.96567
  -1   2  10  730.98   43.59   1-0.20615-0.58203-0.35126 0.07344 0.91329 0.80983
   1   2  -9   18.34   11.07   1-0.69453-0.64704 0.51247 0.05040-0.50496-0.76078
   1  -2  -9   20.51   11.46   1-0.72063-0.36463-0.45422-0.83243-0.52380-0.41725
  -1  -2   9   18.76   11.04   1-0.80819-0.85753-0.53204-0.07120 0.25249 0.50948
  -1  -2   9   14.17    8.65   1 0.30990 0.25931-0.65305-0.19156 0.69100 0.94660
  -1   2   9   14.75    9.46   1-0.23033-0.58818-0.33195 0.04394 0.91474 0.80752
   1   2  -8 2956.04  104.89   1-0.68184-0.65224 0.53784 0.12455-0.49580-0.74770
   1  -2  -8 2764.65   98.75   1-0.69051-0.35226-0.52069-0.84999-0.50206-0.39168
  -1  -2   8 3006.52  112.86   1-0.80897-0.84053-0.51788-0.10591 0.27812 0.53130
  -1  -2   8 2813.70  101.60   1 0.34008 0.30755-0.66382-0.25106 0.66609 0.91780
  -1   2   8 2806.49  103.91   1-0.25415-0.59398-0.31242 0.01466 0.91531 0.80434
   1   2  -7 4567.51  150.07   1-0.66254-0.65065 0.57344 0.20910-0.48187-0.73001
   1  -2  -7 4352.75  141.48   1-0.65193-0.33143-0.59170-0.87208-0.47421-0.36001
  -1  -2   7 4572.61  147.15   1-0.80907-0.82286-0.50481-0.14170 0.30092 0.55028
  -1  -2   7 4383.05  147.68   1 0.38481 0.37031-0.67808-0.31413 0.62619 0.87418
  -1   2   7 4364.03  147.84   1-0.27763-0.59943-0.29268-0.01440 0.91501 0.80029
   1   2  -6  143.90   13.86   1-0.63360-0.63943 0.62132 0.30592-0.46098-0.70535
   1  -2  -6  135.57   13.69   1-0.60219-0.29945-0.66726-0.89874-0.43831-0.32028
  -1  -2   6  131.97   13.38   1-0.80871-0.80472-0.49322-0.17898 0.32046 0.56601
   1  -2  -6  124.56   10.88   1-0.63957-0.33741-0.09699-0.32825 0.76258 0.88227
  -1   2   6  145.95   14.96   1-0.30077-0.60455-0.27273-0.04326 0.91386 0.79538
   1   2  -6  139.27   11.54   1-0.43919-0.44224 0.69730 0.38246-0.56645-0.81125
   1   2  -5   25.91    9.60   1-0.59038-0.61393 0.68318 0.41671-0.42978-0.67039
   1  -2  -5   18.92    8.18   1-0.53775-0.25276-0.74653-0.92910-0.39179-0.26995
  -1  -2   5   22.14    9.35   1-0.80811-0.78635-0.48365-0.21826 0.33619 0.57793
   1  -2  -5   16.56    5.35   1-0.60383-0.31947-0.04811-0.23051 0.79565 0.91913
  -1   2   5   18.40    8.79   1-0.32295-0.60893-0.25313-0.07270 0.91193 0.78988
   1   2  -5   21.00    7.53   1-0.52187-0.54301 0.71114 0.44509-0.47108-0.71205
   1   2  -4  459.29   25.48   1-0.52613-0.56746 0.75906 0.54152-0.38341-0.62027
   1  -2  -4  479.18   23.67   1-0.45426-0.18702-0.82687-0.96054-0.33153-0.20585
  -1  -2   4  484.95   24.48   1-0.80752-0.76798-0.47675-0.26023 0.34729 0.58521
   1  -2  -4  457.83   22.85   1-0.60010-0.33353-0.04321-0.17676 0.79875 0.92601
  -1   2   4  487.20   24.89   1-0.34547-0.61339-0.23273-0.10107 0.90911 0.78328
   1   2  -4  477.23   23.89   1-0.62163-0.66085 0.71148 0.49422-0.32765-0.56480
  -1   2   3   31.85    9.85   1 0.35026 0.10068 0.90289 0.98768 0.24919 0.11972
   1   2  -3   22.18    7.93   1-0.43280-0.49185 0.84427 0.67567-0.31603-0.54913
  -1  -2   3   17.48    8.70   1-0.80719-0.74988-0.47343-0.30578 0.35255 0.58666
   1  -2  -3   18.19    6.02   1-0.60887-0.36010-0.05478-0.13947 0.79137 0.92242
  -1   2   3   14.95    7.03   1-0.36771-0.61758-0.21207-0.12918 0.90543 0.77582
   1   2  -3   40.41    7.45   1-0.72145-0.77877 0.68025 0.51177-0.12943-0.36276
  -1   2   2  243.76   16.11   1 0.21772-0.01413 0.96385 0.99969 0.15352 0.02030
   1   2  -2  225.82   14.67   1-0.30363-0.38037 0.92637 0.80679-0.22280-0.45210
  -1  -2   2  222.99   13.85   1-0.80734-0.73226-0.47493-0.35614 0.35018 0.58047
   1  -2  -2  205.18   11.82   1-0.62353-0.39256-0.07459-0.11042 0.77822 0.91307
  -1   2   2  218.81   13.47   1-0.38972-0.62153-0.19110-0.15698 0.90088 0.76749
   1   2  -2  205.87   13.02   1-0.79061-0.86600 0.60354 0.48383 0.10327-0.12623
  -1   2   1  218.66   16.24   1 0.06327-0.15090 0.99711 0.98398 0.04203-0.09490
   1   2  -1  204.83   14.11   1-0.14109-0.23547 0.98435 0.91374-0.10548-0.33110
  -1  -2   1  202.99   13.27   1-0.80806-0.71520-0.48293-0.41301 0.33735 0.56383
   1  -2  -1  196.76   12.59   1-0.64099-0.42781-0.09902-0.08599 0.76112 0.89976
  -1   2   1  191.34   12.93   1-0.41158-0.62533-0.16973-0.18438 0.89542 0.75825
   1   2  -1  203.29   12.20   1-0.80860-0.90209 0.49112 0.42020 0.32395 0.09827
   1   2   0 5886.31  208.43   1 0.03775-0.07434 0.99900 0.97733 0.02362-0.19821
  -1   2   0 6037.17  205.87   1-0.10057-0.29702 0.99200 0.92990-0.07622-0.21693
   1  -2   0 5914.29  209.83   1-0.65958-0.46420-0.12615-0.06426 0.74097 0.88339
   1   2   1   37.96    8.61   1 0.20791 0.07812 0.96712 0.99436 0.14644-0.07164
  -1   2  -1   33.53   11.51   1-0.25519-0.43395 0.94846 0.83745-0.18783-0.33217
  -1  -2  -1   31.73    8.31   1-0.80843-0.68001-0.52889-0.55669 0.25828 0.47713
   1  -2   1   32.74    8.07   1-0.67831-0.50073-0.15487-0.04413 0.71826 0.86447
  -1   2  -1   33.61    8.67   1-0.45616-0.63380-0.12433-0.23653 0.88116 0.73643
   1   2   1   36.18    7.80   1-0.73912-0.86878 0.26198 0.28855 0.62053 0.40241
   1   2   2   61.44   10.30   1 0.35163 0.20413 0.90208 0.97828 0.25018 0.03585
  -1   2  -2   71.95   12.02   1-0.38539-0.54642 0.87866 0.71872-0.28182-0.42996
  -1  -2  -2   61.95    8.19   1-0.80101-0.65483-0.57432-0.65099 0.16889 0.38393
   1  -2   2   62.94    9.21   1-0.69659-0.53680-0.18450-0.02491 0.69332 0.84333
   1   2   2   62.26    7.97   1-0.68797-0.83571 0.17030 0.24564 0.70547 0.49116
  -1   2  -3  757.82   35.26   1-0.48549-0.62884 0.79932 0.59037-0.35407-0.50597
  -1  -2  -3  777.04   32.89   1-0.46005-0.29499-0.82198-0.94725-0.33570-0.12523
  -1  -2  -3  752.61   34.42   1-0.76837-0.60425-0.63994-0.76606 0.00811 0.21912
   1  -2   3  849.80   36.95   1-0.71404-0.57205-0.21459-0.00614 0.66639 0.82019
   1   2   3  792.48   35.17   1-0.63769-0.80340 0.09432 0.21844 0.76449 0.55390
  -1   2  -3  619.52   43.11   1-0.76845-0.90999 0.32719 0.11745 0.54992 0.39762
  -1   2  -4   32.23   11.09   1-0.55792-0.68354 0.72359 0.46569-0.40635-0.56203
  -1  -2  -4   21.30    8.97   1-0.54535-0.36254-0.73807-0.91226-0.39728-0.19063
  -1  -2  -4   31.13    8.79   1-0.64528-0.46259-0.70787-0.88288-0.28725-0.08070
   1  -2   4   26.37    7.50   1-0.73040-0.60620-0.24484 0.01246 0.63762 0.79521
   1   2   4   30.89   10.40   1-0.59000-0.77378 0.03013 0.20302 0.80683 0.60003
  -1   2  -5   48.16   11.01   1-0.60871-0.71661 0.65817 0.35138-0.44302-0.60248
  -1  -2  -5   36.39    8.50   1-0.60941-0.40885-0.65719-0.88028-0.44352-0.24069
   1  -2   5   32.15    9.06   1-0.74549-0.63908-0.27502 0.03113 0.60712 0.76850
   1  -2   5   44.59    7.41   1 0.36731 0.47292-0.67275-0.36528 0.64224 0.80181
   1   2   5   36.22    8.43   1-0.54538-0.74721-0.02494 0.19671 0.83781 0.63479
  -1   2  -6 2727.84   99.29   1-0.64392-0.73410 0.60492 0.24920-0.46843-0.63165
  -1  -2  -6 2678.86   92.65   1-0.65784-0.43952-0.58164-0.85364-0.47847-0.27947
   1  -2   6 2737.74   97.29   1-0.75903-0.67023-0.30465 0.05036 0.57537 0.74044
   1  -2   6 2656.22   97.70   1 0.24273 0.33028-0.62598-0.26975 0.74109 0.90451
   1   2   6 2744.70   96.33   1-0.50355-0.72342-0.07311 0.19730 0.86086 0.66160
  -1   2  -7   11.76    9.98   1-0.66814-0.74061 0.56343 0.15877-0.48591-0.65290
  -1  -2  -7   10.09    9.19   1-0.69487-0.45880-0.51178-0.83269-0.50520-0.31003
   1  -2   7    8.88    6.77   1-0.77126-0.70024-0.33432 0.06955 0.54163 0.71050
   1  -2   7    8.07    7.28   1 0.17887 0.24840-0.59658-0.19154 0.78235 0.94952
   1   2   7    8.80    9.57   1-0.46395-0.70188-0.11613 0.20305 0.87821 0.68273
  -1   2  -8 2979.66  108.48   1-0.68465-0.73926 0.53235 0.07886-0.49783-0.66877
  -1  -2  -8 3058.04  106.96   1-0.72352-0.46970-0.44716-0.81698-0.52588-0.33454
   1  -2   8 2985.24  110.13   1-0.78193-0.72868-0.36358 0.08915 0.50634 0.67902
   1  -2   8 3056.78  113.01   1 0.14640 0.19790-0.58034-0.12649 0.80110 0.97202
   1   2   8 3111.17  114.35   1-0.42618-0.68217-0.15513 0.21282 0.89123 0.69953
  -1   2  -9  517.49   30.55   1-0.69576-0.73264 0.50993 0.00751-0.50584-0.68056
  -1  -2  -9  536.08   31.10   1-0.74589-0.47432-0.38708-0.80581-0.54203-0.35451
   1  -2   9  524.62   31.29   1-0.79094-0.75548-0.39236 0.10924 0.46952 0.64599
   1  -2   9  517.62   30.30   1 0.13172 0.16520-0.57272-0.07006 0.80909 0.98376
   1   2   9  546.46   32.53   1-0.38985-0.66389-0.19097 0.22575 0.90085 0.71293
  -1   2 -10    8.49   16.68   1-0.70290-0.72206 0.49476-0.05658-0.51100-0.68950
  -1  -2 -10    7.62   10.97   1-0.76345-0.47425-0.33082-0.79852-0.55470-0.37074
   1  -2  10   20.32   10.09   1-0.79824-0.78055-0.42059 0.12987 0.43116 0.61144
   1  -2  10   17.67    8.71   1 0.12819 0.14369-0.57086-0.01940 0.81097 0.98943
   1   2  10   24.28   12.10   1-0.35463-0.64673-0.22428 0.24122 0.90770 0.72356
  -1   2 -11  102.38   18.20   1-0.70709-0.70852 0.48559-0.11469-0.51402-0.69629
  -1  -2 -11  118.95   14.31   1-0.77719-0.47026-0.27775-0.79437-0.56463-0.38446
   1  -2  11  128.28   11.71   1-0.80375-0.80384-0.44822 0.15110 0.39124 0.57533
   1  -2  11  120.10   14.12   1 0.13178 0.12922-0.57275 0.02752 0.80905 0.99123
   1   2  11  108.26   12.61   1-0.32027-0.63043-0.25552 0.25874 0.91221 0.73184
  -1   2 -12 2838.20  137.30   1-0.70897-0.69269 0.48138-0.16783-0.51538-0.70143
  -1  -2 -12 2681.47  128.23   1-0.78787-0.46320-0.22733-0.79287-0.57234-0.39597
   1  -2  12 2792.46  134.25   1-0.80736-0.82512-0.47513 0.17308 0.34986 0.53777
   1  -2  12 2777.12  135.48   1 0.14069 0.12011-0.57740 0.07168 0.80424 0.99016
   1   2  12 2956.24  139.68   1-0.28687-0.61472-0.28477 0.27880 0.91466 0.73782
  -1   2 -13  102.33   15.83   1-0.70900-0.67500 0.48131-0.21683-0.51541-0.70523
  -1  -2 -13  106.82   17.28   1-0.79599-0.45358-0.17908-0.79355-0.57820-0.40563
   1  -2  13  113.49   15.23   1-0.80901-0.84455-0.50141 0.19566 0.30672 0.49844
   1  -2  13  107.22   14.17   1 0.15346 0.11485-0.58395 0.11394 0.79715 0.98682
   1   2  13  126.72   14.59   1-0.25361-0.59949-0.31287 0.29951 0.91530 0.74222
  -1   2 -14 1170.80   57.40   1-0.70748-0.65575 0.48470-0.26237-0.51431-0.70791
  -1  -2 -14 1303.19   60.00   1-0.80194-0.44179-0.13263-0.79602-0.58249-0.41372
   1  -2  14 1189.29   57.85   1-0.80855-0.86186-0.52693 0.21901 0.26186 0.45739
   1  -2  14 1001.46   58.15   1 0.16923 0.11260-0.59185 0.15485 0.78807 0.98149
   1   2  14 1223.69   58.46   1-0.22066-0.58457-0.33973 0.32146 0.91426 0.74493
  -1   2 -15  727.45   34.41   1-0.70461-0.63516 0.49103-0.30497-0.51224-0.70962
  -1  -2 -15  766.61   36.71   1-0.80598-0.42809-0.08766-0.79997-0.58541-0.42044
   1  -2  15  657.48   33.10   1-0.80585-0.87694-0.55162 0.24318 0.21518 0.41453
   1   2  15  738.82   33.37   1-0.18790-0.56983-0.36551 0.34449 0.91163 0.74606
  -1   2 -16 1067.78   50.35   1-0.70052-0.61335 0.49987-0.34506-0.50929-0.71044
  -1  -2 -16 1060.67   46.75   1-0.80832-0.41278-0.04394-0.80519-0.58709-0.42574
   1   2  16 1146.04   51.64   1-0.15522-0.55517-0.39035 0.36846 0.90748 0.74566
   1   3 -16  138.84   20.72   1-0.62396-0.52977 0.63603-0.18972-0.45402-0.82664
   1  -3 -16  131.91   20.24   1-0.79558-0.23850-0.18185-0.88174-0.57790-0.40699
  -1   3  16  151.00   24.29   1-0.08317-0.64402-0.44210 0.25409 0.89309 0.72157
   1   3 -15 1651.88   66.69   1-0.62517-0.54870 0.63420-0.14261-0.45490-0.82375
   1  -3 -15 1625.67   64.30   1-0.78680-0.24745-0.23292-0.88389-0.57156-0.39685
  -1  -3  15 1491.95   65.76   1-0.78925-0.86741-0.60648 0.16838 0.09621 0.46822
  -1   3  15 1612.94   66.01   1-0.10982-0.65262-0.42344 0.22393 0.89924 0.72382
   1   3 -14   23.16   14.17   1-0.62440-0.56565 0.63536-0.09251-0.45434-0.81943
   1  -3 -14   28.21   14.33   1-0.77538-0.25377-0.28537-0.88742-0.56332-0.38481
  -1  -3  14   22.71   11.36   1-0.79538-0.85705-0.59194 0.13394 0.13025 0.49751
  -1   3  14   17.68   12.46   1-0.13592-0.66070-0.40462 0.19394 0.90432 0.72515
   1   3 -13  878.94   31.97   1-0.62133-0.58030 0.63993-0.03900-0.45212-0.81346
   1  -3 -13  905.45   32.93   1-0.76097-0.25695-0.33941-0.89240-0.55292-0.37094
  -1  -3  13  910.87   31.13   1-0.80027-0.84417-0.57698 0.10003 0.16321 0.52665
  -1   3  13  858.60   29.30   1-0.16161-0.66836-0.38557 0.16418 0.90841 0.72549
   1   3 -12  113.49   14.56   1-0.61557-0.59226 0.64837 0.01837-0.44796-0.80553
   1  -3 -12  110.51   16.36   1-0.74313-0.25686-0.39510-0.89918-0.54004-0.35423
  -1  -3  12  130.18   15.12   1-0.80391-0.83003-0.56215 0.06600 0.19415 0.55379
  -1   3  12  126.55   15.18   1-0.18688-0.67561-0.36630 0.13463 0.91153 0.72485
   1   3 -11  462.70   29.53   1-0.60654-0.60095 0.66122 0.08016-0.44145-0.79525
   1  -3 -11  433.91   30.32   1-0.72128-0.25277-0.45263-0.90780-0.52427-0.33464
  -1  -3  11  476.80   29.45   1-0.80646-0.81480-0.54759 0.03169 0.22304 0.57886
  -1   3  11  439.25   28.87   1-0.21177-0.68247-0.34682 0.10531 0.91371 0.72327
   1   3 -11  360.61   24.99   1-0.48357-0.47301 0.70598 0.12584-0.51743-0.87202
   1   3 -10  821.00   45.18   1-0.59349-0.60561 0.67905 0.14692-0.43203-0.78207
   1  -3 -10  770.58   40.68   1-0.69472-0.24396-0.51208-0.91834-0.50510-0.31164
  -1  -3  10  821.94   43.12   1-0.80807-0.79864-0.53349-0.00306 0.24979 0.60179
  -1   3  10  831.06   45.95   1-0.23628-0.68896-0.32712 0.07620 0.91496 0.72078
   1   3 -10  766.70   40.47   1-0.50965-0.51717 0.70975 0.17839-0.48631-0.83708
   1   3  -9 3139.99   76.57   1-0.57535-0.60522 0.70246 0.21924-0.41893-0.76527
   1  -3  -9 2969.75   76.63   1-0.66256-0.22955-0.57339-0.93075-0.48188-0.28461
  -1  -3   9 3049.41   71.82   1-0.80890-0.78169-0.52004-0.03848 0.27428 0.62247
  -1   3   9 3202.17   84.64   1-0.26042-0.69507-0.30720 0.04731 0.91531 0.71737
   1   3  -9 2862.48   76.40   1-0.54459-0.57020 0.71304 0.23047-0.44156-0.78850
   1   3  -8  273.79   22.61   1-0.55090-0.59849 0.73176 0.29748-0.40128-0.74384
   1  -3  -8  280.06   20.50   1-0.62374-0.20848-0.63635-0.94479-0.45386-0.25276
  -1  -3   8  277.19   21.59   1-0.80910-0.76411-0.50747-0.07477 0.29634 0.64072
  -1   3   8  263.40   20.37   1-0.28420-0.70083-0.28707 0.01863 0.91477 0.71308
   1   3  -8  246.36   18.80   1-0.58895-0.63265 0.71384 0.28005-0.37890-0.72202
   1   3  -7 1298.59   64.77   1-0.51837-0.58370 0.76717 0.38182-0.37780-0.71658
   1  -3  -7 1279.12   60.84   1-0.57700-0.17950-0.70039-0.95993-0.42012-0.21520
  -1  -3   7 1339.78   64.01   1-0.80884-0.74608-0.49605-0.11221 0.31575 0.65632
  -1   3   7 1318.12   63.03   1-0.30763-0.70623-0.26672-0.00982 0.91335 0.70790
   1   3  -7 1218.02   62.21   1-0.64181-0.70360 0.70852 0.32352-0.29337-0.63267
   1   3  -6   67.42   12.93   1-0.47569-0.55875 0.80827 0.47186-0.34700-0.68200
   1  -3  -6   67.80   12.79   1-0.52096-0.14121-0.76448-0.97511-0.37967-0.17092
  -1  -3   6   64.70    9.80   1-0.80829-0.72776-0.48609-0.15112 0.33221 0.66896
   1  -3  -6   55.98    8.06   1-0.78779-0.40913-0.38171-0.59231 0.48340 0.69409
  -1   3   6   63.52   11.23   1-0.33013-0.71097-0.24668-0.03889 0.91113 0.70213
   1   3  -6   60.27    8.84   1-0.69939-0.77926 0.69150 0.35528-0.18077-0.51625
   1   3  -5  535.64   26.97   1-0.42046-0.52117 0.85374 0.56641-0.30713-0.63839
   1  -3  -5  528.02   25.40   1-0.45425-0.09225-0.82688-0.98860-0.33152-0.11894
  -1  -3   5  527.53   24.72   1-0.80764-0.70933-0.47799-0.19188 0.34531 0.67825
   1  -3  -5  484.82   23.32   1-0.75897-0.39810-0.30452-0.46625 0.57551 0.79001
  -1   3   5  527.98   26.49   1-0.35290-0.71568-0.22589-0.06687 0.90798 0.69521
   1   3  -5  533.24   26.12   1-0.75359-0.85155 0.65605 0.36862-0.04113-0.37278
  -1   3   4  394.96   22.32   1 0.37898 0.03456 0.88516 0.99796 0.26992 0.05356
   1   3  -4  377.74   22.68   1-0.35075-0.46919 0.90056 0.66217-0.25681-0.58427
  -1  -3   4  371.24   20.69   1-0.80706-0.69098-0.47220-0.23496 0.35449 0.68361
   1  -3  -4  367.99   19.35   1-0.74043-0.39743-0.26462-0.37741 0.61784 0.83642
  -1   3   4  348.69   20.20   1-0.37535-0.72008-0.20485-0.09460 0.90396 0.68740
   1   3  -4  377.60   20.44   1-0.79310-0.90912 0.59777 0.35912 0.11684-0.21098
  -1   3   3 2788.38  101.18   1 0.28861-0.03809 0.93531 0.99915 0.20469-0.01542
   1   3  -3 2788.79  101.23   1-0.26530-0.40149 0.94420 0.75475-0.19514-0.51880
  -1  -3   3 3004.95  108.31   1-0.80674-0.67289-0.46934-0.28096 0.35899 0.68430
   1  -3  -3 2852.74  104.27   1-0.72969-0.40448-0.24348-0.30741 0.63895 0.86133
  -1   3   3 2680.67  100.17   1-0.39750-0.72417-0.18355-0.12208 0.89905 0.67872
   1   3  -3 2747.06  101.23   1-0.80893-0.94305 0.51903 0.32916 0.27608-0.04792
  -1   3   2 1054.17   44.51   1 0.18744-0.12160 0.97341 0.98829 0.13166-0.09212
   1   3  -2 1137.03   47.41   1-0.16485-0.31861 0.97866 0.83816-0.12262-0.44268
  -1  -3   2 1163.37   47.33   1-0.80683-0.65520-0.47012-0.33061 0.35776 0.67926
   1  -3  -2 1159.85   46.36   1-0.72508-0.41767-0.23476-0.24983 0.64741 0.87357
  -1   3   2 1115.35   46.15   1-0.41938-0.72799-0.16197-0.14926 0.89324 0.66913
   1   3  -2 1150.92   47.15   1-0.80023-0.95242 0.42962 0.28850 0.41839 0.09820
  -1   3   1  458.38   24.06   1 0.07863-0.21267 0.99548 0.96142 0.05312-0.17445
   1   3  -1  460.68   25.26   1-0.05326-0.22478 0.99769 0.90612-0.04208-0.35833
  -1  -3   1  453.43   24.04   1-0.80740-0.63799-0.47549-0.38484 0.34928 0.66696
   1  -3  -1  457.13   22.72   1-0.72494-0.43533-0.23450-0.20072 0.64765 0.87760
  -1   3   1  430.84   22.45   1-0.44102-0.73158-0.14003-0.17610 0.88650 0.65861
   1   3  -1  474.14   23.52   1-0.77358-0.94386 0.34035 0.24802 0.53453 0.21816
   1   3   0  156.70   14.97   1 0.06336-0.12587 0.99710 0.95449 0.04210-0.27036
  -1   3   0  153.68   13.87   1-0.03290-0.30650 0.99908 0.91603-0.02738-0.25872
  -1  -3   0  158.29   13.15   1-0.80833-0.62115-0.48664-0.44486 0.33131 0.64518
   1  -3   0  147.88   12.85   1-0.72802-0.45620-0.24030-0.15766 0.64205 0.87579
  -1   3   0  138.06   11.70   1-0.46252-0.73502-0.11765-0.20248 0.87876 0.64709
   1   3   0  152.47   13.18   1-0.73718-0.92560 0.25810 0.21451 0.62445 0.31182
   1   3   1 1261.89   49.78   1 0.17773-0.02923 0.97614 0.98248 0.12466-0.18402
  -1   3  -1 1242.65   51.49   1-0.14096-0.39680 0.98438 0.85240-0.10538-0.34052
  -1  -3  -1 1271.15   50.33   1-0.80908-0.60412-0.50510-0.51217 0.30043 0.61049
   1  -3   1 1212.05   50.48   1-0.73335-0.47933-0.25056-0.11906 0.63198 0.86951
  -1   3  -1 1183.91   48.31   1-0.48405-0.73850-0.09459-0.22819 0.86991 0.63446
   1   3   1 1260.70   51.25   1-0.69704-0.90354 0.18524 0.19042 0.69268 0.38387
   1   3   2 1890.26   69.75   1 0.28368 0.05905 0.93758 0.99283 0.20113-0.10384
  -1   3  -2 1740.89   66.62   1-0.24011-0.47831 0.95448 0.77359-0.17695-0.41565
  -1  -3  -2 1946.52   71.70   1-0.80813-0.58540-0.53273-0.58867 0.25120 0.55745
   1  -3   2 1844.42   70.06   1-0.74020-0.50397-0.26416-0.08380 0.61831 0.85964
  -1   3  -2 1708.43   67.48   1-0.50612-0.74251-0.07024-0.25261 0.85959 0.62036
   1   3   2 1793.81   67.31   1-0.65652-0.88099 0.12160 0.17554 0.74443 0.43935
   1   3   3 1804.95   67.57   1 0.37756 0.13522 0.88607 0.99028 0.26890-0.03231
  -1   3  -3 1871.37   70.68   1-0.32653-0.54700 0.91438 0.68455-0.23933-0.48183
  -1  -3  -3 1607.51   62.23   1-0.80170-0.56119-0.57171-0.67651 0.17440 0.47684
   1  -3   3 1885.94   68.51   1-0.74799-0.52956-0.28029-0.05108 0.60161 0.84673
   1   3   3 1809.79   69.78   1-0.61672-0.85925 0.06532 0.16803 0.78446 0.48315
  -1   3  -4   -4.37    7.45   1-0.39879-0.60152 0.86948 0.59072-0.29148-0.53778
  -1  -3  -4   13.06    8.70   1-0.45408-0.19427-0.82702-0.98035-0.33140-0.03402
  -1  -3  -4    5.91    6.69   1-0.77938-0.52087-0.62447-0.77896 0.05079 0.34913
   1  -3   4   -3.00    9.03   1-0.75626-0.55563-0.29835-0.02028 0.58227 0.83118
   1   3   4    6.49    8.84   1-0.57827-0.83886 0.01524 0.16672 0.81569 0.51817
  -1   3  -5  262.13   17.09   1-0.45733-0.64242 0.82429 0.49647-0.33374-0.58378
  -1  -3  -5  274.19   18.30   1-0.52183-0.24426-0.76358-0.96582-0.38030-0.08675
  -1  -3  -5  220.39   15.37   1-0.71364-0.43628-0.68462-0.88798-0.14828 0.14538
   1  -3   5  257.63   16.74   1-0.76448-0.58140-0.31747 0.00941 0.56104 0.81356
   1   3   5  247.26   17.13   1-0.54122-0.81987-0.02987 0.17037 0.84034 0.54661
  -1   3  -6   33.46    9.66   1-0.50357-0.67093 0.78206 0.40531-0.36712-0.62094
  -1  -3  -6   32.07   10.38   1-0.57809-0.28277-0.69902-0.95017-0.42091-0.13118
   1  -3   6   28.83   10.45   1-0.77273-0.60743-0.33813 0.03761 0.53716 0.79347
   1   3   6   30.85   11.88   1-0.50548-0.80216-0.07095 0.17805 0.85991 0.56993
  -1   3  -7  583.34   34.77   1-0.53953-0.68915 0.74457 0.31887-0.39308-0.65067
  -1  -3  -7  555.37   30.88   1-0.62456-0.31149-0.63512-0.93517-0.45446-0.16855
   1  -3   7  536.47   30.85   1-0.78056-0.63304-0.35961 0.06499 0.51126 0.77138
   1   3   7  534.16   30.09   1-0.47078-0.78551-0.10888 0.18889 0.87550 0.58930
  -1   3  -8 2053.38  105.45   1-0.56711-0.69900 0.71261 0.23798-0.41298-0.67435
  -1  -3  -8 1975.22  103.76   1-0.66288-0.33206-0.57283-0.92180-0.48212-0.20004
   1  -3   8 1948.87  103.80   1-0.78777-0.65803-0.38168 0.09179 0.48345 0.74737
   1   3   8 2091.59  108.16   1-0.43695-0.76974-0.14420 0.20234 0.88784 0.60542
  -1   3  -9 1903.55   50.48   1-0.58795-0.70214 0.68635 0.16285-0.42803-0.69316
  -1  -3  -9 1950.80   51.91   1-0.69446-0.34589-0.51261-0.91048-0.50491-0.22666
   1  -3   9 1876.62   55.00   1-0.79418-0.68221-0.40413 0.11820 0.45380 0.72153
   1   3   9 1910.41   54.07   1-0.40383-0.75468-0.17737 0.21795 0.89747 0.61883
  -1   3 -10 1034.02   53.39   1-0.60346-0.69993 0.66551 0.09306-0.43923-0.70811
  -1  -3 -10  966.05   49.90   1-0.72048-0.35416-0.45456-0.90135-0.52370-0.24926
   1  -3  10  981.84   50.45   1-0.79963-0.70544-0.42682 0.14437 0.42237 0.69390
   1   3  10  978.49   49.06   1-0.37124-0.74015-0.20874 0.23535 0.90476 0.62990
  -1   3 -11   93.28   13.87   1-0.61467-0.69342 0.64967 0.02829-0.44732-0.71997
  -1  -3 -11   98.47   13.33   1-0.74188-0.35780-0.39865-0.89435-0.53914-0.26853
   1  -3  11  108.30   14.04   1-0.80398-0.72757-0.44960 0.17045 0.38918 0.66451
   1   3  11   96.43   16.90   1-0.33906-0.72603-0.23858 0.25427 0.91000 0.63892
  -1   3 -12   22.86   14.34   1-0.62240-0.68343 0.63835-0.03196-0.45289-0.72931
  -1  -3 -12   18.06   17.18   1-0.75940-0.35756-0.34473-0.88933-0.55178-0.28500
   1  -3  12   17.76   16.76   1-0.80706-0.74828-0.47224 0.19669 0.35442 0.63354
   1   3  12   12.64   12.11   1-0.30747-0.71212-0.26686 0.27534 0.91336 0.64580
  -1   3 -13  293.14   22.66   1-0.62726-0.67057 0.63106-0.08819-0.45640-0.73658
  -1  -3 -13  277.47   21.05   1-0.77362-0.35419-0.29258-0.88616-0.56205-0.29875
   1  -3  13  312.47   20.52   1-0.80879-0.76778-0.49486 0.22293 0.31774 0.60066
   1   3  13  328.39   23.46   1-0.27575-0.69843-0.29427 0.29673 0.91507 0.65126
  -1   3 -14  265.53   24.78   1-0.62971-0.65530 0.62733-0.14086-0.45817-0.74211
  -1  -3 -14  265.21   24.06   1-0.78499-0.34782-0.24204-0.88456-0.57025-0.31075
   1  -3  14  260.59   20.57   1-0.80899-0.78575-0.51724 0.24942 0.27927 0.56601
   1   3  14  254.99   18.65   1-0.24412-0.68482-0.32070 0.31911 0.91517 0.65512
  -1   3 -15  429.95   30.42   1-0.63009-0.63796 0.62674-0.19039-0.45844-0.74615
  -1  -3 -15  497.79   31.82   1-0.79387-0.33896-0.19292-0.88435-0.57666-0.32096
   1  -3  15  441.53   26.55   1-0.80751-0.80205-0.53927 0.27625 0.23896 0.52952
   1   3  15  418.45   25.82   1-0.21249-0.67121-0.34625 0.34237 0.91375 0.65745
  -1   3 -16  236.58   26.79   1-0.62866-0.61881 0.62893-0.23714-0.45741-0.74888
  -1  -3 -16  195.10   21.90   1-0.80053-0.32788-0.14500-0.88536-0.58147-0.32957
   1   3  16  220.35   23.62   1-0.18078-0.65753-0.37101 0.36643 0.91086 0.65831
   1   4 -15  119.60   26.36   1-0.53051-0.53118 0.75440-0.04342-0.38656-0.84614
   1  -4 -15  119.88   20.43   1-0.76808-0.15172-0.31402-0.94411-0.55805-0.29261
  -1  -4  15   97.94   18.08   1-0.79220-0.79509-0.59993 0.19554 0.11181 0.57409
  -1   4  15  139.84   22.50   1-0.12269-0.74229-0.41422 0.21177 0.90186 0.63572
   1   4 -14  342.14   22.04   1-0.52574-0.54414 0.75948 0.01058-0.38312-0.83892
   1  -4 -14  334.35   20.45   1-0.75246-0.15368-0.36719-0.94823-0.54677-0.27789
  -1  -4  14  320.95   22.03   1-0.79741-0.78254-0.58620 0.16040 0.14311 0.60157
  -1   4  14  327.10   20.73   1-0.14806-0.74963-0.39568 0.18149 0.90636 0.63647
   1   4 -13  -12.70   19.58   1-0.51809-0.55422 0.76746 0.06750-0.37760-0.82962
   1  -4 -13   -4.81   16.37   1-0.73367-0.15264-0.42119-0.95332-0.53321-0.26050
  -1  -4  13  -13.10   20.17   1-0.80146-0.76881-0.57263 0.12511 0.17246 0.62711
  -1   4  13   -1.45   13.39   1-0.17292-0.75647-0.37701 0.15135 0.90991 0.63627
   1   4 -12  267.44   23.49   1-0.50712-0.56099 0.77855 0.12754-0.36968-0.81793
   1  -4 -12  275.57   17.98   1-0.71133-0.14805-0.47605-0.95927-0.51708-0.24055
  -1  -4  12  297.91   21.27   1-0.80448-0.75405-0.55934 0.08953 0.19983 0.65067
  -1   4  12  266.88   19.93   1-0.19727-0.76280-0.35823 0.12133 0.91254 0.63514
   1   4 -11  312.07   20.45   1-0.49232-0.56392 0.79292 0.19085-0.35900-0.80347
   1  -4 -11  328.71   22.62   1-0.68500-0.13948-0.53167-0.96599-0.49808-0.21772
  -1  -4  11  315.42   19.02   1-0.80662-0.73842-0.54649 0.05352 0.22518 0.67221
  -1   4  11  282.54   23.10   1-0.22112-0.76862-0.33936 0.09139 0.91429 0.63313
   1   4 -10  118.84   17.92   1-0.47302-0.56236 0.81065 0.25751-0.34507-0.78576
   1  -4 -10  119.81   17.33   1-0.65419-0.12642-0.58787-0.97328-0.47584-0.19166
  -1  -4  10   97.87   17.24   1-0.80800-0.72203-0.53422 0.01692 0.24843 0.69164
  -1   4  10  102.50   14.15   1-0.24445-0.77393-0.32043 0.06151 0.91518 0.63027
   1   4  -9 1981.06   96.13   1-0.44848-0.55555 0.83168 0.32748-0.32736-0.76427
   1  -4  -9 2194.26  105.57   1-0.61835-0.10833-0.64433-0.98083-0.44997-0.16196
  -1  -4   9 2051.86   98.44   1-0.80878-0.70503-0.52272-0.02043 0.26947 0.70887
  -1   4   9 2052.84   98.74   1-0.26725-0.77870-0.30147 0.03166 0.91525 0.62658
   1   4  -8  808.84   43.66   1-0.41774-0.54242 0.85578 0.40070-0.30517-0.73838
   1  -4  -8  805.71   41.70   1-0.57688-0.08462-0.70054-0.98812-0.42004-0.12821
  -1  -4   8  788.55   40.55   1-0.80908-0.68756-0.51219-0.05876 0.28815 0.72374
  -1   4   8  820.22   44.53   1-0.28949-0.78292-0.28251 0.00181 0.91453 0.62211
   1   4  -7    0.91   12.96   1-0.38005-0.52246 0.88221 0.47607-0.27796-0.70737
   1  -4  -7    8.26   13.37   1-0.52924-0.05473-0.75575-0.99443-0.38565-0.08999
  -1  -4   7    7.70    9.44   1-0.80904-0.66974-0.50284-0.09828 0.30428 0.73605
  -1   4   7   10.30    8.46   1-0.31058-0.78628-0.26412-0.02897 0.91311 0.61717
   1   4  -6 1949.43  100.66   1-0.33445-0.49460 0.90999 0.55279-0.24504-0.67066
   1  -4  -6 2049.18  106.42   1-0.47492-0.01816-0.80896-0.99873-0.34644-0.04696
  -1  -4   6 1999.21  103.38   1-0.80879-0.65172-0.49494-0.13925 0.31760 0.74556
  -1   4   6 1993.69  105.09   1-0.33159-0.78924-0.24536-0.05898 0.91095 0.61124
   1   4  -5 1141.40   63.19   1-0.28026-0.45815 0.93757 0.62930-0.20593-0.62775
   1  -4  -5 1062.61   58.10   1-0.41364 0.02536-0.85881-0.99967-0.30221 0.00109
  -1  -4   5 1202.06   65.59   1-0.80847-0.63362-0.48879-0.18196 0.32779 0.75193
   1  -4  -5 1169.80   63.82   1-0.79466-0.35728-0.40595-0.54695 0.45134 0.75709
  -1   4   5 1125.23   62.36   1-0.35188-0.79147-0.22683-0.08921 0.90814 0.60465
   1   4  -5 1051.28   62.30   1-0.80768-0.98243 0.47843 0.16961 0.34459-0.07774
  -1   4   4 1004.30   50.40   1 0.34878-0.07275 0.90375 0.99561 0.24813-0.05887
   1   4  -4 1001.02   50.21   1-0.21712-0.41252 0.96288 0.70355-0.16035-0.57865
  -1  -4   4  997.64   49.75   1-0.80820-0.61557-0.48474-0.22677 0.33441 0.75474
   1  -4  -4  890.36   46.00   1-0.78372-0.36412-0.36893-0.46107 0.49966 0.80921
  -1   4   4  999.52   51.02   1-0.37135-0.79288-0.20864-0.11980 0.90474 0.59747
   1   4  -4 1000.87   51.49   1-0.79555-0.98838 0.40942 0.14934 0.44661 0.02811
  -1   4   3 1045.79   53.63   1 0.27425-0.12957 0.94181 0.98471 0.19433-0.11642
   1   4  -3 1151.59   56.43   1-0.14565-0.35881 0.98333 0.77294-0.10877-0.52326
  -1  -4   3 1144.50   57.05   1-0.80808-0.59768-0.48321-0.27411 0.33689 0.75341
   1  -4  -3 1155.69   55.82   1-0.77525-0.37343-0.34481-0.38809 0.52922 0.84257
  -1   4   3 1114.76   56.03   1-0.38983-0.79331-0.19099-0.15092 0.90086 0.58980
   1   4  -3 1143.75   56.35   1-0.77344-0.98436 0.33997 0.12868 0.53498 0.12029
  -1   4   2 2795.79  100.89   1 0.19454-0.19164 0.97130 0.96525 0.13679-0.17764
   1   4  -2 2893.86  105.23   1-0.06703-0.29794 0.99639 0.83494-0.05202-0.46270
  -1  -4   2 2975.45  107.87   1-0.80819-0.58002-0.48470-0.32446 0.33449 0.74719
   1  -4  -2 3073.67  111.83   1-0.76960-0.38556-0.33007-0.32449 0.54658 0.86373
  -1   4   2 2884.62  105.72   1-0.40708-0.79250-0.17417-0.18287 0.89663 0.58179
   1   4  -2 2885.74  104.75   1-0.74486-0.97396 0.27371 0.11120 0.60848 0.19754
  -1   4   1 1801.17   69.72   1 0.11148-0.25696 0.99079 0.93579 0.07683-0.24138
   1   4  -1 1806.43   70.55   1 0.01664-0.23199 0.99982 0.88733 0.00838-0.39852
  -1  -4   1 1870.94   73.73   1-0.80853-0.56258-0.48978-0.37841 0.32616 0.73505
   1  -4  -1 1840.41   70.12   1-0.76653-0.40028-0.32245-0.26800 0.55537 0.87632
  -1   4   1 1809.23   73.13   1-0.42269-0.79006-0.15865-0.21612 0.89227 0.57366
   1   4  -1 1867.67   73.13   1-0.71310-0.96028 0.21292 0.09916 0.66794 0.26080
   1   4   0 5155.43  176.90   1 0.10255-0.16381 0.99223 0.92868 0.07039-0.33272
  -1   4   0 4993.35  178.03   1 0.02747-0.32323 0.99949 0.89554 0.01619-0.30581
  -1  -4   0 5299.64  195.19   1-0.80895-0.54523-0.49918-0.43667 0.31048 0.71556
   1  -4   0 5163.28  189.70   1-0.76568-0.41720-0.32036-0.21705 0.55775 0.88251
  -1   4   0 4862.69  181.13   1-0.43597-0.78527-0.14521-0.25145 0.88816 0.56577
   1   4   0 4958.62  175.59   1-0.68007-0.94533 0.15765 0.09266 0.71598 0.31265
   1   4   1  707.15   34.22   1 0.18771-0.09639 0.97333 0.95873 0.13186-0.26746
  -1   4  -1  769.29   36.90   1-0.05488-0.38786 0.99755 0.84462-0.04324-0.36901
  -1  -4  -1  717.08   33.26   1-0.80906-0.52757-0.51373-0.50009 0.28545 0.68671
   1  -4   1  691.38   30.43   1-0.76662-0.43592-0.32266-0.17049 0.55512 0.88368
  -1   4  -1  668.00   33.09   1-0.44555-0.77680-0.13537-0.29038 0.88496 0.55879
   1   4   1  730.40   34.40   1-0.64707-0.93030 0.10776 0.09153 0.75476 0.35517
   1   4   2 3258.49  115.73   1 0.26934-0.03241 0.94395 0.97825 0.19078-0.20483
  -1   4  -2 2973.05  105.50   1-0.13288-0.44811 0.98611 0.78424-0.09955-0.42912
  -1  -4  -2 3410.38  129.38   1-0.80799-0.50872-0.53441-0.56963 0.24809 0.64554
   1  -4   2 3130.58  117.71   1-0.76897-0.45605-0.32850-0.12746 0.54841 0.88077
  -1   4  -2 2837.73  115.40   1-0.44838-0.76158-0.13244-0.33622 0.88397 0.55402
   1   4   2 3168.66  113.68   1-0.61431-0.91559 0.06206 0.09460 0.78662 0.39081
   1   4   3  361.57   25.01   1 0.34550 0.02603 0.90566 0.98892 0.24575-0.14610
  -1   4  -3  347.82   24.73   1-0.20456-0.50203 0.96709 0.71627-0.15129-0.48467
  -1  -4  -3  276.56   19.60   1-0.80389-0.48684-0.56228-0.64636 0.19389 0.58753
   1  -4   3  376.52   23.82   1-0.77237-0.47723-0.33719-0.08729 0.53826 0.87443
   1   4   3  368.74   24.24   1-0.58210-0.90145 0.02007 0.10138 0.81286 0.42084
  -1   4  -4 5856.66  254.60   1-0.26862-0.54852 0.94277 0.64307-0.19753-0.53439
  -1  -4  -4 5882.67  254.18   1-0.41079-0.07397-0.86090-0.99337-0.30015 0.08795
  -1  -4  -4 5992.84  274.50   1-0.79287-0.45805-0.59831-0.73126 0.11558 0.50540
   1  -4   4 5855.39  261.34   1-0.77651-0.49914-0.34821-0.04945 0.52514 0.86510
   1   4   4 5752.03  255.20   1-0.55049-0.88789-0.01883 0.11124 0.83462 0.44638
  -1   4  -5  591.50   36.36   1-0.32436-0.58653 0.91556 0.56692-0.23776-0.57842
  -1  -4  -5  565.76   34.45   1-0.47284-0.11827-0.81081-0.99220-0.34494 0.03933
   1  -4   5  546.66   34.16   1-0.78109-0.52151-0.36114-0.01352 0.50937 0.85313
   1   4   5  560.79   35.20   1-0.51942-0.87488-0.05519 0.12365 0.85272 0.46827
  -1   4  -6 3278.80  165.44   1-0.37188-0.61632 0.88751 0.48994-0.27206-0.61652
  -1  -4  -6 3301.89  166.93   1-0.52753-0.15520-0.75758-0.98787-0.38441-0.00395
   1  -4   6 3233.04  164.01   1-0.78588-0.54408-0.37562 0.02085 0.49120 0.83877
   1   4   6 3386.59  174.21   1-0.48886-0.86234-0.08935 0.13825 0.86777 0.48707
  -1   4  -7 1923.04   51.24   1-0.41169-0.63839 0.86024 0.41374-0.30080-0.64905
  -1  -4  -7 2037.39   51.13   1-0.57524-0.18516-0.70259-0.98179-0.41885-0.04222
   1  -4   7 2082.13   60.12   1-0.79066-0.56663-0.39137 0.05397 0.47082 0.82219
   1   4   7 2112.41   54.48   1-0.45860-0.85014-0.12177 0.15459 0.88025 0.50333
  -1   4  -8 2475.65   69.74   1-0.44456-0.65365 0.83489 0.33927-0.32452-0.67648
  -1  -4  -8 2612.75   71.05   1-0.61658-0.20875-0.64691-0.97501-0.44869-0.07588
   1  -4   8 2460.10   68.20   1-0.79522-0.58897-0.40813 0.08607 0.44838 0.80355
   1   4   8 2496.29   76.24   1-0.42861-0.83821-0.15268 0.17246 0.89049 0.51735
  -1   4  -9   44.01   12.86   1-0.47123-0.66259 0.81225 0.26770-0.34377-0.69950
  -1  -4  -9   45.95   14.96   1-0.65220-0.22661-0.59124-0.96826-0.47440-0.10542
   1  -4   9   43.78   15.79   1-0.79939-0.61092-0.42570 0.11737 0.42396 0.78294
   1   4   9   46.83   13.71   1-0.39880-0.82646-0.18228 0.19163 0.89873 0.52937
  -1   4 -10 2664.17  115.60   1-0.49256-0.66619 0.79269 0.19920-0.35917-0.71868
  -1  -4 -10 2603.08  110.36   1-0.68275-0.23941-0.53606-0.96199-0.49646-0.13130
   1  -4  10 2558.03  115.71   1-0.80300-0.63231-0.44390 0.14803 0.39765 0.76043
   1   4  10 2651.22  117.19   1-0.36910-0.81481-0.21076 0.21192 0.90517 0.53959
  -1   4 -11  229.98   21.30   1-0.50931-0.66520 0.77637 0.13395-0.37126-0.73454
  -1  -4 -11  238.47   21.78   1-0.70884-0.24775-0.48167-0.95651-0.51529-0.15395
   1  -4  11  247.76   20.78   1-0.80590-0.65299-0.46257 0.17822 0.36951 0.73609
   1   4  11  217.07   20.95   1-0.33943-0.80320-0.23825 0.23320 0.90995 0.54815
  -1   4 -12 1383.80   76.30   1-0.52211-0.66028 0.76328 0.07191-0.38051-0.74756
  -1  -4 -12 1332.46   71.72   1-0.73100-0.25216-0.42820-0.95195-0.53128-0.17377
   1  -4  12 1308.58   72.55   1-0.80794-0.67261-0.48144 0.20822 0.33977 0.71008
   1   4  12 1425.57   76.15   1-0.30974-0.79157-0.26486 0.25536 0.91318 0.55515
  -1   4 -13  643.53   35.84   1-0.53153-0.65196 0.75330 0.01299-0.38730-0.75813
  -1  -4 -13  666.72   33.97   1-0.74969-0.25310-0.37572-0.94837-0.54478-0.19109
   1  -4  13  665.28   35.13   1-0.80899-0.69144-0.50065 0.23787 0.30801 0.68214
   1   4  13  630.26   30.00   1-0.28027-0.77974-0.29043 0.27919 0.91492 0.56039
  -1   4 -14  688.17   35.06   1-0.53800-0.64070 0.74626-0.04298-0.39197-0.76658
  -1  -4 -14  718.97   36.57   1-0.76531-0.25112-0.32418-0.94581-0.55605-0.20582
   1  -4  14  707.41   34.66   1-0.80890-0.70912-0.51995 0.26743 0.27444 0.65239
   1   4  14  692.14   38.43   1-0.25036-0.76786-0.31556 0.30287 0.91527 0.56449
   1   5 -13   10.89   20.31   1-0.40850-0.52167 0.86256 0.14188-0.29850-0.84126
   1  -5 -13   21.43   17.18   1-0.71163-0.05360-0.47535-0.98663-0.51730-0.15386
  -1  -5  13   18.03   17.15   1-0.80024-0.69105-0.57709 0.14138 0.16298 0.70884
  -1   5  13   28.30   20.93   1-0.16848-0.82883-0.38038 0.12661 0.90935 0.54497
   1   5 -12  892.49   43.48   1-0.39406-0.52496 0.87277 0.20101-0.28807-0.82704
   1  -5 -12  990.00   45.35   1-0.68699-0.04671-0.52774-0.99011-0.49952-0.13225
  -1  -5  12  934.16   46.05   1-0.80318-0.67621-0.56552 0.10408 0.18726 0.72930
  -1   5  12  961.46   45.70   1-0.19141-0.83373-0.36280 0.09538 0.91199 0.54386
   1   5 -11  534.08   32.15   1-0.37581-0.52445 0.88498 0.26216-0.27490-0.81007
   1  -5 -11  550.84   28.69   1-0.65877-0.03624-0.58002-0.99348-0.47915-0.10806
  -1  -5  11  580.86   29.12   1-0.80537-0.66063-0.55448 0.06625 0.20954 0.74777
  -1   5  11  591.36   29.30   1-0.21366-0.83796-0.34532 0.06405 0.91383 0.54195
   1   5 -10 1230.85   71.08   1-0.35333-0.51971 0.89902 0.32513-0.25867-0.79005
   1  -5 -10 1140.33   63.12   1-0.62669-0.02192-0.63191-0.99646-0.45599-0.08108
  -1  -5  10 1173.54   65.17   1-0.80693-0.64441-0.54412 0.02776 0.22975 0.76416
  -1   5  10 1248.57   70.55   1-0.23521-0.84148-0.32799 0.03257 0.91492 0.53929
   1   5  -9 1023.89   35.34   1-0.32620-0.51031 0.91456 0.38961-0.23909-0.76666
   1  -5  -9  964.89   33.15   1-0.59048-0.00346-0.68304-0.99868-0.42985-0.05111
  -1  -5   9 1070.19   35.95   1-0.80797-0.62768-0.53458-0.01156 0.24777 0.77838
  -1   5   9  947.08   30.72   1-0.25601-0.84426-0.31087 0.00087 0.91531 0.53592
   1   5  -8 1211.36   58.40   1-0.29398-0.49583 0.93112 0.45510-0.21583-0.73961
   1  -5  -8 1220.28   59.27   1-0.54989 0.01937-0.73291-0.99965-0.40055-0.01799
  -1  -5   8 1192.53   59.19   1-0.80861-0.61054-0.52603-0.05188 0.26349 0.79027
  -1   5   8 1195.63   60.87   1-0.27599-0.84622-0.29407-0.03112 0.91506 0.53191
   1   5  -7  101.45   14.23   1-0.25631-0.47590 0.94800 0.52091-0.18864-0.70862
   1  -5  -7   98.30   13.93   1-0.50474 0.04676-0.78091-0.99873-0.36797 0.01841
  -1  -5   7  104.43   14.62   1-0.80894-0.59310-0.51868-0.09339 0.27671 0.79969
  -1   5   7  106.31   14.18   1-0.29508-0.84728-0.27768-0.06354 0.91422 0.52732
   1   5  -6 2150.36  104.73   1-0.21282-0.44986 0.96435 0.58619-0.15725-0.67379
   1  -5  -6 2094.02   99.27   1-0.45497 0.07878-0.82628-0.99519-0.33204 0.05816
  -1  -5   6 2092.34  100.86   1-0.80908-0.57546-0.51272-0.13630 0.28722 0.80638
  -1   5   6 2054.68  100.78   1-0.31260-0.84705-0.26234-0.09736 0.91293 0.52250
   1   5  -5  144.96   17.38   1-0.16374-0.41854 0.97895 0.64973-0.12183-0.63455
  -1  -5   5  139.88   17.02   1-0.80910-0.55771-0.50840-0.18084 0.29474 0.81009
   1  -5  -5  126.93   13.27   1-0.80718-0.29314-0.47329-0.59360 0.35277 0.74946
  -1   5   5  152.94   15.57   1-0.32949-0.84589-0.24725-0.13105 0.91120 0.51699
  -1   5   4 3479.84  158.13   1 0.34563-0.15303 0.90558 0.97649 0.24585-0.15179
   1   5  -4 3393.67  150.64   1-0.10918-0.38173 0.99059 0.71032-0.08244-0.59137
  -1  -5   4 3316.61  150.72   1-0.80909-0.53992-0.50598-0.22729 0.29890 0.81044
   1  -5  -4 3351.39  163.05   1-0.80259-0.30650-0.44165-0.51305 0.40097 0.80176
  -1   5   4 3469.54  158.62   1-0.34499-0.84333-0.23317-0.16574 0.90918 0.51118
  -1   5   3 1927.17   88.55   1 0.28350-0.19744 0.93766 0.95961 0.20100-0.20039
   1   5  -3 1889.23   87.02   1-0.04972-0.34002 0.99798 0.76664-0.03952-0.54464
  -1  -5   3 1928.80   89.99   1-0.80908-0.52214-0.50578-0.27595 0.29925 0.80697
   1  -5  -3 1901.10   88.49   1-0.79775-0.31943-0.41846-0.44100 0.43413 0.83873
  -1   5   3 1846.94   89.34   1-0.35876-0.83904-0.22045-0.20178 0.90702 0.50525
  -1   5   2 1464.03   42.19   1 0.21858-0.24465 0.96356 0.93655 0.15414-0.25102
   1   5  -2 1497.11   46.55   1 0.01374-0.29429 0.99988 0.81750 0.00628-0.49504
  -1  -5   2 1498.30   46.93   1-0.80910-0.50438-0.50815-0.32718 0.29517 0.79908
   1  -5  -2 1576.04   47.53   1-0.79370-0.33316-0.40232-0.37600 0.45625 0.86465
  -1   5   2 1400.38   43.84   1-0.37031-0.83254-0.20961-0.23972 0.90494 0.49939
   1   5  -2 1369.29   43.51   1-0.66541-0.97135 0.13493-0.04898 0.73417 0.23252
  -1   5   1  549.54   25.13   1 0.15202-0.29356 0.98266 0.90672 0.10609-0.30276
   1   5  -1  597.13   24.42   1 0.07992-0.24584 0.99533 0.86190 0.05405-0.44348
  -1  -5   1  589.76   24.16   1-0.80907-0.48658-0.51348-0.38138 0.28589 0.78599
   1  -5  -1  531.95   23.44   1-0.79080-0.34804-0.39187-0.31669 0.47016 0.88236
  -1   5   1  480.36   23.57   1-0.37890-0.82307-0.20147-0.28035 0.90323 0.49390
   1   5  -1  558.65   23.76   1-0.63968-0.96360 0.09715-0.03801 0.76247 0.26459
   1   5   0 1707.51   46.20   1 0.14737-0.19613 0.98372 0.89924 0.10274-0.39100
  -1   5   0 1596.45   47.40   1 0.08507-0.34276 0.99469 0.86981 0.05777-0.35487
  -1  -5   0 1604.46   45.50   1-0.80881-0.46854-0.52223-0.43899 0.27036 0.76664
   1  -5   0 1614.68   49.83   1-0.78912-0.36413-0.38611-0.26206 0.47771 0.89371
  -1   5   0 1566.92   49.13   1-0.38323-0.80935-0.19733-0.32498 0.90232 0.48921
   1   5   0 1687.89   51.75   1-0.61381-0.95579 0.06139-0.02500 0.78706 0.29296
   1   5   1  389.81   21.12   1 0.21449-0.14666 0.96495 0.92934 0.15119-0.33883
  -1   5  -1  385.84   21.43   1 0.01918-0.39092 0.99976 0.82593 0.01021-0.40622
  -1  -5  -1  446.69   22.69   1-0.80794-0.44990-0.53491-0.50054 0.24715 0.73962
   1  -5   1  449.12   23.90   1-0.78855-0.38135-0.38423-0.21133 0.48014 0.89994
   1   5   1  434.49   21.44   1-0.58795-0.94799 0.02750-0.01012 0.80842 0.31811
   1   5   2 2952.86  132.09   1 0.28004-0.09883 0.93923 0.95258 0.19851-0.28775
  -1   5  -2 3041.61   76.81   1-0.04433-0.43670 0.99838 0.77556-0.03563-0.45583
  -1  -5  -2 3076.26   88.85   1-0.80577-0.42996-0.55209-0.56658 0.21427 0.70293
   1  -5   2 2764.84   74.21   1-0.78897-0.39955-0.38562-0.16385 0.47833 0.90194
   1   5   2 3017.00   80.62   1-0.56211-0.94021-0.00477 0.00635 0.82704 0.34051
   1   5   3  167.74   17.13   1 0.34271-0.05388 0.90726 0.96958 0.24374-0.23876
  -1   5  -3  190.97   16.59   1-0.10416-0.47878 0.99143 0.71967-0.07882-0.50283
  -1  -5  -3  158.73   16.54   1-0.80101-0.40742-0.57432-0.63768 0.16889 0.65373
   1  -5   3  156.69   13.44   1-0.79019-0.41855-0.38976-0.11913 0.47293 0.90034
   1   5   3  159.55   12.73   1-0.53627-0.93242-0.03570 0.02420 0.84329 0.36054
   1   5   4 1170.50   40.81   1 0.40155-0.01277 0.86996 0.98120 0.28621-0.19253
  -1   5  -4 1163.62   39.92   1-0.15943-0.51629 0.98004 0.65934-0.11872-0.54653
  -1  -5  -4 1085.95   39.77   1-0.79126-0.37989-0.60209-0.71431 0.10670 0.58773
   1  -5   4 1090.67   37.70   1-0.79204-0.43817-0.39623-0.07674 0.46439 0.89560
   1   5   4 1156.67   41.08   1-0.51043-0.92461-0.06540 0.04325 0.85742 0.37844
  -1   5  -5 2682.48   78.49   1-0.20954-0.54864 0.96545 0.59581-0.15488-0.58650
  -1  -5  -5 2661.69   73.26   1-0.45210-0.02052-0.82868-0.98921-0.32997 0.14504
   1  -5   5 2646.23   81.48   1-0.79433-0.45824-0.40468-0.03632 0.45306 0.88808
   1   5   5 2827.04   83.15   1-0.48446-0.91670-0.09414 0.06328 0.86972 0.39453
  -1   5  -6  156.69   16.21   1-0.25426-0.57587 0.94885 0.53033-0.18716-0.62218
  -1  -5  -6  168.93   15.58   1-0.50199-0.05265-0.78362-0.99305-0.36598 0.10520
   1  -5   6  165.86   18.38   1-0.79688-0.47857-0.41479 0.00242 0.43922 0.87804
   1   5   6  178.03   15.18   1-0.45838-0.90867-0.12200 0.08419 0.88033 0.40891
  -1   5  -7   48.19   15.11   1-0.29339-0.59726 0.93140 0.46395-0.21541-0.65422
  -1  -5  -7   54.88   12.06   1-0.54712-0.08004-0.73607-0.99441-0.39856 0.06880
   1  -5   7   71.15   14.81   1-0.79953-0.49900-0.42633 0.03974 0.42306 0.86568
   1   5   7   57.14   14.96   1-0.43216-0.90051-0.14909 0.10587 0.88938 0.42174
  -1   5  -8  452.78   30.91   1-0.32719-0.61333 0.91402 0.39763-0.23981-0.68242
  -1  -5  -8  434.21   25.99   1-0.58761-0.10277-0.68680-0.99406-0.42778 0.03575
   1  -5   8  421.03   26.62   1-0.80211-0.51937-0.43906 0.07587 0.40475 0.85117
   1   5   8  421.62   27.97   1-0.40575-0.89216-0.17547 0.12826 0.89697 0.43311
  -1   5  -9  346.13   24.30   1-0.35598-0.62438 0.89742 0.33210-0.26058-0.70700
  -1  -5  -9  369.09   20.91   1-0.62367-0.12108-0.63646-0.99262-0.45381 0.00589
   1  -5   9  350.60   22.74   1-0.80449-0.53952-0.45280 0.11100 0.38439 0.83462
   1   5   9  362.32   24.00   1-0.37915-0.88361-0.20124 0.15127 0.90318 0.44310
  -1   5 -10  533.62   39.03   1-0.38013-0.63079 0.88215 0.26790-0.27802-0.72823
  -1  -5 -10  560.22   36.68   1-0.65557-0.13523-0.58552-0.99059-0.47684-0.02095
   1  -5  10  515.24   32.54   1-0.80651-0.55932-0.46736 0.14530 0.36208 0.81611
   1   5  10  531.15   35.78   1-0.35231-0.87483-0.22643 0.17484 0.90807 0.45177
  -1   5 -11  368.01   25.75   1-0.40006-0.63299 0.86859 0.20540-0.29240-0.74641
  -1  -5 -11  412.14   25.12   1-0.68364-0.14554-0.53434-0.98832-0.49710-0.04503
   1  -5  11  386.57   30.13   1-0.80802-0.57837-0.48243 0.17908 0.33815 0.79586
   1   5  11  403.01   28.88   1-0.32521-0.86578-0.25110 0.19894 0.91169 0.45916
  -1   5 -12   12.44   19.62   1-0.41617-0.63136 0.85694 0.14483-0.30403-0.76183
  -1  -5 -12    2.34   16.10   1-0.70816-0.15231-0.48319-0.98608-0.51480-0.06656
   1  -5  12    3.71   16.97   1-0.80892-0.59705-0.49822 0.21216 0.31211 0.77363
   1   5  12    7.91   19.27   1-0.29813-0.85638-0.27503 0.22441 0.91404 0.46502
  -1   5 -13  460.25   31.20   1-0.42889-0.62652 0.84731 0.08602-0.31321-0.77463
  -1  -5 -13  422.98   24.30   1-0.72944-0.15583-0.43225-0.98405-0.53016-0.08574
   1  -5  13  447.31   26.83   1-0.80905-0.61496-0.51442 0.24483 0.28424 0.74958
   1   5  13  464.99   26.07   1-0.27044-0.84671-0.29878 0.24946 0.91519 0.46993
   1   6 -10   14.22   16.78   1-0.23929-0.48285 0.95479 0.35996-0.17636-0.79829
   1  -6 -10   20.02   16.02   1-0.61190 0.06987-0.65365-0.99734-0.44531 0.02032
  -1  -6  10   19.67   16.89   1-0.80436-0.56530-0.55995 0.03265 0.19861 0.82423
  -1   6  10   12.87   17.63   1-0.21127-0.89434-0.34722-0.00803 0.91367 0.44730
   1   6  -9  295.37   23.92   1-0.21202-0.47293 0.96462 0.41870-0.15667-0.77525
   1  -6  -9  354.28   24.10   1-0.57714 0.08688-0.70021-0.99500-0.42023 0.04923
  -1  -6   9  304.11   21.21   1-0.80575-0.54892-0.55221-0.00847 0.21402 0.83583
  -1   6   9  358.92   26.21   1-0.22969-0.89474-0.33246-0.04208 0.91471 0.44459
   1   6  -8  113.30   22.32   1-0.18089-0.45955 0.97430 0.47732-0.13420-0.74897
   1  -6  -8   89.47   18.54   1-0.53906 0.10721-0.74509-0.99096-0.39274 0.08055
  -1  -6   8   91.29   14.63   1-0.80675-0.53214-0.54547-0.05059 0.22714 0.84513
  -1   6   8  114.28   19.13   1-0.24702-0.89404-0.31832-0.07675 0.91523 0.44135
   1   6  -7  644.89   39.94   1-0.14565-0.44207 0.98333 0.53530-0.10877-0.71973
   1  -6  -7  593.04   37.55   1-0.49765 0.13086-0.78782-0.98479-0.36285 0.11426
  -1  -6   7  580.93   35.19   1-0.80744-0.51505-0.53988-0.09387 0.23782 0.85200
  -1   6   7  582.06   40.16   1-0.26311-0.89210-0.30495-0.11219 0.91530 0.43766
   1   6  -6   99.02   15.70   1-0.10633-0.42051 0.99107 0.59197-0.08039-0.68755
   1  -6  -6   86.07   14.47   1-0.45302 0.15774-0.82791-0.97597-0.33063 0.15030
  -1  -6   6  106.82   18.63   1-0.80788-0.49772-0.53561-0.13846 0.24584 0.85621
  -1   6   6  117.34   19.02   1-0.27778-0.88875-0.29256-0.14861 0.91501 0.43362
   1   6  -5  850.21   42.31   1-0.06310-0.39503 0.99679 0.64663-0.04918-0.65253
  -1  -6   5  833.38   43.26   1-0.80812-0.48019-0.53286-0.18457 0.25097 0.85752
  -1   6   5  854.39   43.83   1-0.29078-0.88373-0.28141-0.18627 0.91446 0.42932
  -1   6   4   27.20   20.12   1 0.35859-0.21720 0.89793 0.94788 0.25520-0.23309
   1   6  -4   32.60   15.63   1-0.01625-0.36594 0.99975 0.69853-0.01536-0.61491
  -1  -6   4   39.70   14.15   1-0.80821-0.46250-0.53183-0.23241 0.25287 0.85561
   1  -6  -4   26.92   14.35   1-0.80898-0.23617-0.50024-0.55096 0.30869 0.80041
  -1   6   4   19.95   13.69   1-0.30177-0.87669-0.27186-0.22553 0.91379 0.42490
  -1   6   3 1128.75   58.50   1 0.30604-0.25203 0.92689 0.92788 0.21727-0.27477
   1   6  -3 1042.68   50.70   1 0.03371-0.33371 0.99921 0.74695 0.02070-0.57506
  -1  -6   3 1073.52   54.50   1-0.80813-0.44465-0.53276-0.28220 0.25115 0.85008
   1  -6  -3 1100.69   54.79   1-0.80769-0.25266-0.47862-0.48047 0.34429 0.83982
  -1   6   3 1136.70   54.54   1-0.31025-0.86715-0.26441-0.26689 0.91314 0.42049
  -1   6   2   -6.84   16.60   1 0.25186-0.28849 0.95121 0.90325 0.17817-0.31764
   1   6  -2   -6.68   16.15   1 0.08616-0.29900 0.99455 0.79124 0.05856-0.53341
  -1  -6   2    5.68   13.41   1-0.80785-0.42659-0.53590-0.33421 0.24531 0.84042
   1  -6  -2    0.80   12.50   1-0.80593-0.26889-0.46278-0.41573 0.36917 0.86882
  -1   6   1  637.04   36.01   1 0.19682-0.32589 0.97061 0.87374 0.13843-0.36106
   1   6  -1  637.79   36.49   1 0.14031-0.26259 0.98527 0.83091 0.09764-0.49053
  -1  -6   1  686.36   40.14   1-0.80725-0.40821-0.54153-0.38870 0.23469 0.82599
   1  -6  -1  679.09   35.97   1-0.80423-0.28497-0.45119-0.35527 0.38681 0.89026
   1   6   0   48.18   17.90   1 0.19530-0.22533 0.97107 0.86565 0.13734-0.44705
  -1   6   0   54.59   15.35   1 0.14163-0.36334 0.98499 0.83917 0.09860-0.40468
  -1  -6   0   60.32   14.98   1-0.80611-0.38930-0.54996-0.44600 0.21844 0.80593
   1  -6   0   57.60   15.35   1-0.80293-0.30145-0.44352-0.29874 0.39821 0.90547
   1   6   1  480.31   31.64   1 0.25018-0.18810 0.95188 0.89533 0.17695-0.40372
  -1   6  -1  462.68   30.87   1 0.08718-0.40005 0.99442 0.79965 0.05930-0.44778
  -1  -6  -1  369.45   31.02   1-0.80405-0.36946-0.56151-0.50642 0.19544 0.77912
   1  -6   1  514.72   30.04   1-0.80214-0.31844-0.43922-0.24558 0.40452 0.91557
   1   6   1  467.68   29.98   1-0.51843-0.95529-0.05631-0.11535 0.85325 0.27222
   1   6   2   90.24   17.78   1 0.30427-0.15172 0.92777 0.92017 0.21600-0.36091
  -1   6  -2  112.04   14.88   1 0.03429-0.43520 0.99918 0.75547 0.02112-0.48975
  -1  -6  -2   88.16   12.22   1-0.80040-0.34805-0.57652-0.57029 0.16420 0.74406
   1  -6   2   99.74   13.52   1-0.80188-0.33596-0.43784-0.19533 0.40654 0.92139
   1   6   2  107.62   16.28   1-0.49942-0.95429-0.07771-0.08800 0.86286 0.28560
   1   6   3  715.06   39.39   1 0.35674-0.11698 0.89904 0.94040 0.25387-0.31928
  -1   6  -3  705.29   39.99   1-0.01629-0.46805 0.99974 0.70708-0.01539-0.53005
  -1  -6  -3  712.73   40.56   1-0.79410-0.32396-0.59529-0.63792 0.12259 0.69864
   1  -6   3  714.73   37.84   1-0.80210-0.35395-0.43898-0.14761 0.40487 0.92354
   1   6   3  723.57   39.27   1-0.47957-0.95250-0.09944-0.06096 0.87184 0.29837
  -1   6  -4    6.66   13.88   1-0.06397-0.49797 0.99670 0.65506-0.04980-0.56825
   1  -6   4   -1.95   15.26   1-0.80272-0.37235-0.44231-0.10208 0.39999 0.92246
   1   6   4    7.46   10.14   1-0.45900-0.94999-0.12135-0.03410 0.88010 0.31040
  -1   6  -5 1266.12   57.85   1-0.10816-0.52441 0.99076 0.60018-0.08171-0.60395
  -1  -6  -5 1386.81   61.89   1-0.45040 0.05818-0.83009-0.96976-0.32874 0.23699
   1  -6   5 1356.48   61.68   1-0.80363-0.39105-0.44755-0.05846 0.39224 0.91851
   1   6   5 1531.76   69.47   1-0.43778-0.94682-0.14335-0.00733 0.88757 0.32165
  -1   6  -6  390.89   29.07   1-0.14859-0.54708 0.98266 0.54313-0.11089-0.63694
  -1  -6  -6  349.29   27.73   1-0.49488 0.03146-0.79049-0.97907-0.36085 0.20106
   1  -6   6  392.39   28.89   1-0.80475-0.40994-0.45445-0.01650 0.38189 0.91196
   1   6   6  359.51   27.71   1-0.41595-0.94305-0.16539 0.01940 0.89421 0.33207
  -1   6  -7  234.48   20.33   1-0.18506-0.56580 0.97309 0.48463-0.13722-0.66707
  -1  -6  -7  221.50   18.15   1-0.53609 0.00799-0.74835-0.98584-0.39060 0.16749
   1  -6   7  212.04   19.26   1-0.80593-0.42890-0.46280 0.02401 0.36916 0.90302
   1   6   7  224.96   20.92   1-0.39354-0.93869-0.18740 0.04615 0.90000 0.34164
  -1   6  -8   83.43   17.60   1-0.21754-0.58052 0.96273 0.42533-0.16066-0.69432
  -1  -6  -8   79.79   14.26   1-0.57397-0.01212-0.70419-0.99058-0.41793 0.13633
   1  -6   8   86.07   17.54   1-0.80706-0.44755-0.47218 0.06347 0.35452 0.89200
   1   6   8   98.68   18.03   1-0.37057-0.93378-0.20937 0.07295 0.90489 0.35031
  -1   6  -9  553.50   33.84   1-0.24618-0.59176 0.95210 0.36584-0.18133-0.71831
  -1  -6  -9  545.32   31.18   1-0.60850-0.02891-0.65847-0.99377-0.44286 0.10757
   1  -6   9  543.20   31.38   1-0.80805-0.46632-0.48286 0.10165 0.33746 0.87875
   1   6   9  586.58   31.71   1-0.34707-0.92834-0.23126 0.09983 0.90887 0.35807
  -1   6 -10   20.74   16.09   1-0.27089-0.59874 0.94177 0.30658-0.19917-0.73994
  -1  -6 -10    1.90   17.87   1-0.63978-0.04243-0.61158-0.99579-0.46544 0.08117
   1  -6  10    8.49   13.23   1-0.80877-0.48481-0.49446 0.13892 0.31841 0.86351
   1   6  10   15.78   13.90   1-0.32304-0.92236-0.25305 0.12682 0.91192 0.36490
   1   7  -6  138.03   20.13   1-0.01030-0.40165 0.99988 0.57984-0.01106-0.70884
   1  -7  -6  109.92   18.28   1-0.46355 0.22422-0.81896-0.94616-0.33824 0.23343
  -1  -7   6  105.28   19.75   1-0.80408-0.41737-0.56136-0.14349 0.19576 0.89733
   1   7  -5   73.04   20.05   1 0.02742-0.38166 0.99949 0.62839 0.01615-0.67782
   1  -7  -5   62.73   14.45   1-0.42177 0.24825-0.85275-0.93105-0.30807 0.26741
  -1  -7   5   84.00   18.42   1-0.80437-0.39989-0.55991-0.19090 0.19870 0.89646
  -1   7   4  700.39   38.61   1 0.38184-0.27107 0.88329 0.91230 0.27199-0.30695
   1   7  -4  721.14   37.09   1 0.06766-0.35916 0.99668 0.67453 0.04520-0.64498
  -1  -7   4  647.38   34.02   1-0.80435-0.38210-0.56001-0.23986 0.19850 0.89244
  -1   7   3    2.56   13.66   1 0.33686-0.29834 0.91057 0.89062 0.23952-0.34318
   1   7  -3   25.12   15.69   1 0.11006-0.33450 0.99102 0.71783 0.07581-0.61059
  -1  -7   3   16.62   15.72   1-0.80398-0.36395-0.56183-0.29055 0.19480 0.88493
  -1   7   2  223.77   23.93   1 0.29086-0.32662 0.93425 0.86533 0.20632-0.38013
   1   7  -2  195.83   24.30   1 0.15414-0.30815 0.98216 0.75791 0.10763-0.57498
  -1  -7   2  233.82   25.64   1-0.80317-0.34537-0.56558-0.34316 0.18715 0.87347
  -1   7   1   11.56   12.33   1 0.24436-0.35541 0.95417 0.83630 0.17275-0.41746
   1   7  -1    4.88   17.10   1 0.19941-0.28062 0.96981 0.79451 0.14031-0.53851
  -1  -7   1   16.67   13.96   1-0.80177-0.32619-0.57143-0.39788 0.17498 0.85748
   1  -7  -1    2.87   11.87   1-0.80906-0.21303-0.50377-0.38717 0.30269 0.89705
   1   7   0  132.06   16.19   1 0.24522-0.25247 0.95383 0.82737 0.17337-0.50170
  -1   7   0  115.46   19.00   1 0.19792-0.38419 0.97027 0.80351 0.13923-0.45470
  -1  -7   0  151.48   22.01   1-0.79951-0.30616-0.57961-0.45493 0.15755 0.83624
   1  -7   0  131.09   16.79   1-0.80880-0.23055-0.49509-0.32963 0.31735 0.91552
   1   7   1   28.12   19.03   1 0.29121-0.22420 0.93409 0.85658 0.20657-0.46475
  -1   7  -1   42.26   17.29   1 0.15199-0.41237 0.98267 0.76696 0.10608-0.49164
  -1  -7  -1   26.31   12.76   1-0.79598-0.28485-0.59032-0.51449 0.13391 0.80879
   1  -7   1   50.09   17.21   1-0.80850-0.24802-0.48933-0.27499 0.32691 0.92890
   1   7   2   71.64   15.37   1 0.33672-0.19641 0.91065 0.88211 0.23942-0.42814
  -1   7  -2   56.48   16.88   1 0.10717-0.43946 0.99150 0.72684 0.07372-0.52778
   1  -7   2   60.25   14.56   1-0.80829-0.26559-0.48613-0.22293 0.33215 0.93795
   1   7   3   73.84   20.43   1 0.38125-0.16959 0.88368 0.90409 0.27156-0.39223
  -1   7  -3   83.91   16.91   1 0.06394-0.46495 0.99704 0.68344 0.04252-0.56277
   1  -7   3   71.51   17.67   1-0.80823-0.28330-0.48521-0.17315 0.33365 0.94326
  -1   7  -4  623.54   34.09   1 0.02276-0.48839 0.99965 0.63710 0.01280-0.59629
  -1  -7  -4  617.35   29.89   1-0.42026 0.14757-0.85389-0.92379-0.30699 0.35330
   1  -7   4  591.69   30.00   1-0.80831-0.30115-0.48630-0.12538 0.33186 0.94529
  -1   7  -5   24.12   21.70   1-0.01598-0.50941 0.99975 0.58825-0.01517-0.62805
  -1  -7  -5   -2.89   18.14   1-0.46166 0.12393-0.82059-0.93941-0.33687 0.31959
   1  -7   5    9.74   15.58   1-0.80849-0.31911-0.48919-0.07940 0.32714 0.94438
  -1   7  -6  111.69   26.67   1-0.05205-0.52769 0.99779 0.53732-0.04120-0.65789
  -1  -7  -6  106.87   15.28   1-0.50098 0.10236-0.78460-0.95232-0.36525 0.28739
   1  -7   6   77.66   18.99   1-0.80873-0.33713-0.49366-0.03500 0.31975 0.94080
   2   0 -17    4.06   16.36   1-0.78851-0.40276 0.22394-0.56745-0.57279-0.71817
  -2   0  17    4.86   18.66   1 0.14494-0.24551-0.57959 0.20898 0.80191 0.94659
   2   0 -16    8.98   17.45   1-0.79395-0.42593 0.19238-0.55008-0.57673-0.71832
  -2   0  16    2.35   14.42   1 0.12487-0.24751-0.56911 0.17066 0.81272 0.95373
   2   0 -15   -3.56   15.43   1-0.79854-0.44825 0.16084-0.53269-0.58004-0.71785
  -2   0  15    0.44   11.17   1 0.10602-0.24834-0.55897 0.13199 0.82237 0.95963
   2   0 -14    1.17   10.83   1-0.80230-0.46973 0.12926-0.51534-0.58275-0.71677
  -2   0  14    2.16   13.18   1 0.08861-0.24773-0.54936 0.09279 0.83087 0.96437
   2   0 -13   -0.78   12.79   1-0.80523-0.49039 0.09755-0.49812-0.58487-0.71511
  -2   0  13  -16.34   15.29   1 0.07284-0.24548-0.54046 0.05288 0.83820 0.96795
   2   0 -12 1227.43   61.24   1-0.80735-0.51023 0.06561-0.48113-0.58640-0.71285
  -2   0  12 1105.89   66.88   1-0.68695-0.98544-0.69648-0.15065-0.20737-0.07873
  -2   0  12 1185.58   59.84   1 0.05899-0.24130-0.53248 0.01205 0.84438 0.97037
   2   0 -11   -4.47   11.22   1-0.80865-0.52925 0.03331-0.46450-0.58733-0.71001
  -2   0  11    1.77    8.63   1-0.69839-0.97906-0.69193-0.19500-0.18296-0.05832
  -2   0  11   -1.60   10.44   1 0.04745-0.23483-0.52571-0.02998 0.84933 0.97157
   2   0 -10   79.38   13.01   1-0.80910-0.54743 0.00045-0.44843-0.58766-0.70655
  -2   0  10   89.73   12.12   1-0.70696-0.96981-0.68801-0.23999-0.16381-0.04317
  -2   0  10   92.59   12.89   1 0.03871-0.22555-0.52053-0.07361 0.85296 0.97144
   2   0  -9    8.46   10.10   1-0.80865-0.56471-0.03324-0.43320-0.58734-0.70244
  -2   0   9   -3.81    7.36   1-0.71360-0.95785-0.68465-0.28536-0.14838-0.03300
  -2   0   9   -4.76   10.07   1 0.03352-0.21272-0.51742-0.11931 0.85507 0.96980
   2   0  -8  219.19   17.01   1-0.80720-0.58086-0.06842-0.41934-0.58629-0.69767
  -2   0   8  193.76   17.01   1-0.71585-0.94237-0.68344-0.33307-0.14305-0.03155
  -2   0   8  226.70   17.52   1 0.03292-0.19530-0.51706-0.16776 0.85531 0.96628
   2   0  -7    0.46    9.02   1-0.80459-0.59598-0.10537-0.40737-0.58440-0.69198
  -2   0   7   -1.05    7.36   1-0.71413-0.92294-0.68436-0.38291-0.14713-0.03951
  -2   0   7    2.55    8.56   1 0.03845-0.17174-0.52037-0.21988 0.85306 0.96028
   2   0  -6 1490.54   58.38   1-0.80047-0.60961-0.14548-0.39855-0.58143-0.68522
  -2   0   6 1466.63   57.12   1-0.70641-0.89797-0.68828-0.43587-0.16506-0.06042
  -2   0   6 1485.80   58.35   1 0.05248-0.13970-0.52867-0.27699 0.84719 0.95066
   2   0  -5    4.42    6.45   1-0.79417-0.62105-0.19099-0.39513-0.57688-0.67687
  -2   0   5    7.10    6.12   1-0.69212-0.86586-0.69451-0.49101-0.19649-0.09586
  -2   0   5   10.88    9.35   1 0.07869-0.09547-0.54378-0.34091 0.83552 0.93523
   2   0  -4   22.16    7.87   1-0.78403-0.62864-0.24674-0.40196-0.56956-0.66575
  -2   0   4    7.16    7.57   1-0.66642-0.82234-0.70301-0.54840-0.24830-0.15167
  -2   0   4   10.36    9.39   1 0.12302-0.03311-0.56813-0.41406 0.81368 0.90964
   2   0  -3    0.24    6.28   1-0.76504-0.62739-0.32515-0.43145-0.55586-0.64824
  -2   0   3    1.70    7.40   1-0.62261-0.76071-0.71137-0.60567-0.32602-0.23339
  -2   0   3    3.54    7.04   1 0.19497 0.05683-0.60432-0.49906 0.77251 0.86469
   2   0  -2 2000.25   79.63   1-0.71426-0.59432-0.46931-0.52661-0.51920-0.60782
  -2   0   2 2093.19   80.11   1-0.55001-0.67031-0.71336-0.65667-0.43428-0.34563
  -2   0   2 1883.38   70.57   1 0.30866 0.18854-0.65259-0.59614 0.69199 0.78042
   2   0  -1    6.64    6.61   1-0.01508 0.08699 0.99978 0.99123-0.01452-0.09941
  -2   0   1    3.10    7.32   1-0.43666-0.53911-0.69673-0.68894-0.56911-0.48447
   2   0  -1    3.71    5.99   1-0.47367-0.37144 0.70428 0.69677-0.52878-0.61361
  -2   0   0 3325.90  126.60   1-0.27493-0.35944-0.64500-0.68623-0.71300-0.63236
  -2   0  -1   -2.82   13.18   1-0.79325-0.85993 0.19678 0.10746-0.57621-0.49895
  -2   0  -1   -0.00    7.97   1-0.07627-0.14281-0.54850-0.63871-0.83266-0.75607
   2   0   1    5.14    6.85   1-0.79530-0.72925 0.59217 0.68222 0.12972 0.05253
  -2   0  -2 3635.34  128.06   1-0.80702-0.85598 0.07160-0.06665-0.58616-0.51268
  -2   0  -2 3946.47  149.53   1 0.12777 0.07918-0.41719-0.55628-0.89979-0.82721
   2   0   2 3910.77  133.62   1-0.79623-0.74826 0.41215 0.55096 0.44288 0.36950
  -2   0  -3   -0.16    8.82   1-0.80884-0.84008 0.02541-0.16176-0.58747-0.51778
  -2   0  -3   -1.31    8.48   1 0.30886 0.27814-0.27280-0.46083-0.91114-0.84276
   2   0   3    3.97    7.10   1-0.73013-0.70019 0.24432 0.43185 0.63813 0.56853
  -2   0  -4  958.23   42.55   1-0.80906-0.82257 0.00990-0.22620-0.58763-0.52172
   2   0   4  776.50   34.71   1-0.43773-0.42390 0.14341 0.37957 0.88759 0.82233
   2   0   4  854.01   36.43   1-0.65156-0.63962 0.11428 0.35059 0.74993 0.68408
  -2   0  -5    2.00    6.96   1-0.80906-0.80485 0.00928-0.27575-0.58763-0.52551
   2   0   5    1.28    5.07   1-0.54634-0.55031 0.02380 0.30882 0.83722 0.77575
   2   0   5    3.99    6.81   1-0.57869-0.58481 0.01576 0.30083 0.81539 0.75332
  -2   0  -6   82.37   11.69   1-0.80898-0.78704 0.01701-0.31695-0.58757-0.52923
   2   0   6   77.23    8.73   1-0.62721-0.64897-0.07965 0.25421 0.77476 0.71708
   2   0   6   83.86   10.78   1-0.51453-0.53871-0.06076 0.27308 0.85531 0.79700
  -2   0  -7   -7.37    9.45   1-0.80874-0.76907 0.02991-0.35298-0.58740-0.53284
   2   0   7    0.85    5.98   1-0.68696-0.72652-0.16867 0.21405 0.70684 0.65295
   2   0   7   -1.42    7.52   1-0.45785-0.50008-0.12256 0.26005 0.88053 0.82600
  -2   0  -8 3635.67  122.68   1-0.80823-0.75084 0.04627-0.38555-0.58703-0.53626
   2   0   8 3484.76  117.72   1-0.73085-0.78820-0.24571 0.18587 0.63677 0.58667
   2   0   8 3758.18  128.70   1-0.40697-0.46726-0.17428 0.25710 0.89665 0.84590
  -2   0  -9   -3.29   10.67   1-0.80738-0.73227 0.06507-0.41568-0.58642-0.53943
   2   0   9   -0.59    7.00   1-0.76259-0.83765-0.31295 0.16754 0.56612 0.51986
   2   0   9   -3.81    6.21   1-0.36044-0.43879-0.21887 0.26128 0.90673 0.85976
  -2   0 -10    1.61   12.35   1-0.80612-0.71328 0.08568-0.44399-0.58551-0.54230
   2   0  10    2.63    7.07   1-0.78486-0.87770-0.37244 0.15692 0.49524 0.45278
   2   0  10    1.87   10.69   1-0.31715-0.41356-0.25830 0.27063 0.91251 0.86932
  -2   0 -11   -2.68   13.42   1-0.80438-0.69382 0.10769-0.47091-0.58425-0.54483
   2   0  11    0.00    7.15   1-0.79935-0.90997-0.42554 0.15268 0.42419 0.38553
   2   0  11   -7.95   10.34   1-0.27647-0.39067-0.29366 0.28449 0.91505 0.87546
  -2   0 -12   96.07   12.87   1-0.80213-0.67384 0.13082-0.49671-0.58263-0.54699
   2   0  12   96.72   11.49   1-0.80719-0.93558-0.47339 0.15375 0.35261 0.31785
   2   0  12  112.76   14.62   1-0.23738-0.36960-0.32622 0.30075 0.91500 0.87916
  -2   0 -13    5.04   15.70   1-0.79932-0.65330 0.15487-0.52160-0.58060-0.54875
   2   0  13    1.75   11.15   1-0.19961-0.34986-0.35640 0.31937 0.91275 0.88068
  -2   0 -14  793.81   41.53   1-0.79590-0.63216 0.17969-0.54570-0.57813-0.55006
   2   0  14  834.48   43.79   1-0.16280-0.33107-0.38468 0.33991 0.90858 0.88025
  -2   0 -15   10.91   16.93   1-0.79185-0.61038 0.20519-0.56913-0.57520-0.55092
   2   0  15   13.88   14.79   1-0.12666-0.31295-0.41136 0.36203 0.90262 0.87805
  -2   0 -16  191.38   20.24   1-0.78711-0.58792 0.23129-0.59196-0.57179-0.55129
   2   0  16  167.14   18.08   1-0.09097-0.29528-0.43670 0.38550 0.89499 0.87418
  -2   0 -17   13.36   17.97   1-0.78166-0.56474 0.25793-0.61424-0.56785-0.55114
   2   0  17   10.59   18.02   1-0.05564-0.27791-0.46081 0.41013 0.88575 0.86865
   2   1 -17 1111.88   54.18   1-0.75080-0.44223 0.37232-0.44007-0.54558-0.78151
   2  -1 -17 1122.52   52.27   1-0.80627-0.34346 0.08344-0.68704-0.58562-0.64031
  -2  -1  17 1037.73   53.07   1 0.23813-0.07549-0.62398 0.18599 0.74426 0.97964
  -2   1  17 1184.76   54.36   1 0.07453-0.39270-0.54142 0.22577 0.83744 0.89151
   2   1 -16  286.56   25.48   1-0.75744-0.46659 0.35123-0.41223-0.55037-0.78253
   2  -1 -16  294.02   26.14   1-0.80836-0.36328 0.04264-0.67892-0.58713-0.63803
  -2  -1  16  234.72   25.37   1 0.22198-0.07361-0.61681 0.14435 0.75515 0.98678
  -2   1  16  259.03   23.97   1 0.05188-0.39733-0.52832 0.19006 0.84745 0.89777
   2   1 -15 1916.17   99.79   1-0.76326-0.49013 0.33146-0.38306-0.55457-0.78295
   2  -1 -15 1912.92  100.26   1-0.80910-0.38174 0.00083-0.67180-0.58766-0.63478
  -2  -1  15 1821.71   98.05   1 0.20773-0.06984-0.61030 0.10205 0.76444 0.99232
  -2   1  15 1926.86  101.82   1 0.03015-0.40104-0.51539 0.15418 0.85642 0.90298
   2   1 -14  451.04   20.71   1-0.76829-0.51288 0.31325-0.35235-0.55820-0.78281
   2  -1 -14  508.54   22.10   1-0.80838-0.39874-0.04225-0.66595-0.58714-0.63047
  -2  -1  14  431.31   25.08   1-0.73510-0.99127-0.67135-0.00696-0.09433 0.13163
  -2  -1  14  535.91   25.06   1 0.19565-0.06390-0.60464 0.05890 0.77208 0.99621
  -2   1  14  496.60   21.96   1 0.00941-0.40376-0.50271 0.11805 0.86440 0.90721
   2   1 -13 1584.08   78.27   1-0.77254-0.53476 0.29690-0.31968-0.56127-0.78219
   2  -1 -13 1830.14   90.71   1-0.80602-0.41397-0.08708-0.66173-0.58543-0.62508
  -2  -1  13 1871.50   94.60   1-0.74726-0.98571-0.66178-0.04630-0.06019 0.16190
  -2  -1  13 1903.97   94.69   1 0.18611-0.05542-0.60009 0.01464 0.77797 0.99835
  -2   1  13 1874.26   91.81   1-0.01023-0.40539-0.49039 0.08156 0.87143 0.91049
   2   1 -12   46.37   11.39   1-0.77599-0.55593 0.28284-0.28480-0.56376-0.78090
   2  -1 -12   52.56   11.60   1-0.80181-0.42749-0.13383-0.65955-0.58239-0.61824
  -2  -1  12   57.14   13.58   1-0.75745-0.97818-0.65224-0.08567-0.02896 0.18925
  -2  -1  12   44.54   13.22   1 0.17959-0.04392-0.59694-0.03100 0.78192 0.99855
  -2   1  12   54.60   13.00   1-0.02865-0.40579-0.47858 0.04456 0.87757 0.91287
   2   1 -11 1448.13   43.83   1-0.77861-0.57628 0.27166-0.24706-0.56565-0.77901
   2  -1 -11 1367.32   38.78   1-0.79538-0.43881-0.18318-0.65998-0.57776-0.60980
  -2  -1  11 1302.48   48.36   1-0.76585-0.96886-0.64301-0.12535-0.00083 0.21350
  -2  -1  11 1468.87   42.13   1 0.17675-0.02873-0.59555-0.07843 0.78362 0.99650
  -2   1  11 1415.31   43.18   1-0.04566-0.40478-0.46745 0.00689 0.88283 0.91438
   2   1 -10  362.85   24.86   1-0.78029-0.59569 0.26417-0.20562-0.56687-0.77644
   2  -1 -10  368.76   24.58   1-0.78622-0.44739-0.23586-0.66374-0.57115-0.59939
  -2   1  10  296.61   30.81   1-0.49367-0.83363-0.70757-0.28027-0.50559-0.47592
  -2  -1  10  368.27   25.03   1-0.77264-0.95793-0.63439-0.16564 0.02389 0.23435
  -2  -1  10  384.10   27.73   1 0.17848-0.00899-0.59639-0.12808 0.78259 0.99172
  -2   1  10  356.92   24.81   1-0.06099-0.40209-0.45722-0.03169 0.88725 0.91505
   2   1  -9 3783.56  139.97   1-0.78087-0.61399 0.26159-0.15927-0.56728-0.77307
   2  -1  -9 3883.43  138.64   1-0.77354-0.45245-0.29288-0.67183-0.56199-0.58644
  -2  -1   9 3626.13  146.52   1-0.77794-0.94551-0.62673-0.20690 0.04480 0.25138
  -2  -1   9 3995.57  146.33   1 0.18598 0.01653-0.60003-0.18052 0.77805 0.98343
  -2   1   9 4064.75  147.12   1-0.07428-0.39736-0.44821-0.07149 0.89083 0.91487
   2   1  -8  788.42   32.67   1-0.77995-0.63080 0.26570-0.10623-0.56662-0.76863
   2  -1  -8  794.31   33.68   1-0.75610-0.45264-0.35562-0.68551-0.54940-0.57024
  -2   1   8  584.21   54.57   1-0.46842-0.77266-0.70333-0.37382-0.53470-0.51306
  -2  -1   8  755.70   33.50   1-0.78183-0.93168-0.62046-0.24955 0.06127 0.26398
  -2  -1   8  781.87   34.63   1 0.20096 0.04954-0.60715-0.23645 0.76875 0.97038
  -2   1   8  737.38   32.83   1-0.08501-0.39006-0.44084-0.11292 0.89355 0.91383
   2   1  -7 7429.21  255.62   1-0.77683-0.64540 0.27932-0.04369-0.56436-0.76258
   2  -1  -7 6952.66  238.60   1-0.73194-0.44623-0.42575-0.70674-0.53196-0.54898
  -2   1   7 6889.03  272.62   1-0.43642-0.72281-0.69667-0.41607-0.56936-0.55174
  -2  -1   7 7483.60  262.95   1-0.78433-0.91646-0.61609-0.29408 0.07246 0.27129
  -2  -1   7 7402.28  259.70   1 0.22576 0.09236-0.61851-0.29662 0.75264 0.95051
  -2   1   7 7048.79  239.44   1-0.09253-0.37958-0.43561-0.15658 0.89536 0.91181
   2   1  -6 3480.38  127.86   1-0.76992-0.65630 0.30710 0.03294-0.55937-0.75377
   2  -1  -6 3399.86  118.90   1-0.69778-0.42982-0.50570-0.73778-0.50730-0.52050
  -2   1   6 3081.16  141.03   1-0.38678-0.65532-0.68379-0.45209-0.61872-0.60511
  -2  -1   6 2856.14  140.83   1-0.78535-0.89976-0.61421-0.34112 0.07717 0.27212
  -2  -1   6 3428.11  120.01   1 0.26360 0.14822-0.63483-0.36175 0.72628 0.92041
  -2   1   6 3544.55  127.04   1-0.09545-0.36447-0.43357-0.20335 0.89604 0.90873
   2   1  -5 3656.11  131.97   1-0.75576-0.65987 0.35669 0.13147-0.54916-0.73978
   2  -1  -5 3564.35  125.47   1-0.64797-0.39777-0.59829-0.78145-0.47135-0.48072
  -2   1   5 3645.51  134.33   1-0.31427-0.56515-0.66007-0.47756-0.68230-0.67269
  -2  -1   5 3761.96  134.81   1-0.78460-0.88129-0.61560-0.39142 0.07369 0.26476
  -2  -1   5 3593.80  132.79   1 0.31867 0.22131-0.65627-0.43200 0.68391 0.87429
  -2   1   5 3503.74  130.26   1-0.09186-0.34286-0.43608-0.25459 0.89520 0.90422
   2   1  -4  303.28   16.43   1-0.72570-0.64753 0.44173 0.26543-0.52746-0.71430
   2  -1  -4  304.28   15.11   1-0.57267-0.34022-0.70580-0.84006-0.41700-0.42254
  -2   1   4  314.87   17.97   1-0.21965-0.45261-0.62145-0.48783-0.75202-0.74642
  -2  -1   4  288.56   15.01   1-0.78144-0.86041-0.62112-0.44586 0.05956 0.24675
  -2  -1   4  308.34   17.51   1 0.39539 0.31607-0.68113-0.50560 0.61621 0.80278
  -2   1   4  305.98   17.05   1-0.07894-0.31192-0.44502-0.31234 0.89203 0.89729
   2   1  -3  491.57   25.06   1-0.65628-0.59594 0.58432 0.45685-0.47735-0.66040
   2  -1  -3  481.63   23.56   1-0.45533-0.24064-0.82597-0.91132-0.33230-0.33402
  -2   1   3  528.19   28.92   1-0.10342-0.31850-0.56357-0.47897-0.81956-0.81801
  -2  -1   3  471.39   23.84   1-0.77453-0.83579-0.63175-0.50540 0.03118 0.21450
  -2   1   3  495.97   25.67   1-0.05094-0.26590-0.46394-0.38008 0.88439 0.88590
   2   1  -3  504.15   24.87   1-0.49162-0.43004 0.70726 0.58080-0.50802-0.69118
  -2   1   2 4313.96  158.03   1 0.27487 0.07796 0.94154 0.97814 0.19477 0.19275
   2   1  -2 4488.33  149.42   1-0.48458-0.44202 0.80017 0.72166-0.35341-0.53274
  -2   1   2 4991.44  182.15   1 0.02428-0.17284-0.48777-0.45205-0.87263-0.87508
  -2  -1   2 4761.93  164.11   1-0.76122-0.80475-0.64827-0.57083-0.01663 0.16280
  -2   1   2 5233.80  175.51   1 0.00295-0.19398-0.49869-0.46364 0.86677 0.86452
   2   1  -2 4692.00  155.96   1-0.61090-0.56740 0.71257 0.63489-0.34501-0.52435
   2   1   0 2904.47  100.18   1 0.28904 0.29627 0.93510 0.95452 0.20500 0.03325
  -2   1   0 3054.15  109.53   1-0.25634-0.41780 0.94799 0.88668-0.18866-0.19806
  -2   1   0 3278.07  125.12   1 0.27006 0.10882-0.30614-0.36809-0.91287-0.92339
  -2  -1   0 2901.82  106.64   1-0.68984-0.69762-0.69540-0.71585-0.20131-0.02955
  -2   1   0 2525.76   93.32   1 0.30376 0.14286-0.65075-0.71332 0.69588 0.68611
   2   1   0 3136.71  109.57   1-0.79404-0.78673 0.59543 0.61531 0.12226-0.04942
  -2   1  -2 3348.72  119.35   1-0.60799-0.73405 0.65920 0.50003-0.44249-0.45947
  -2  -1  -2 3470.55  124.91   1-0.63459-0.60651-0.61976-0.73725-0.46170-0.29764
  -2  -1  -2 3374.33  123.01   1-0.44903-0.42108-0.69946-0.81779-0.55598-0.39230
   2  -1   2 3362.67  117.03   1-0.45425-0.32839 0.12633 0.28554 0.88186 0.90034
   2   1   2 3549.91  126.42   1-0.77882-0.80766 0.35463 0.47205 0.51737 0.35331
  -2   1  -3  584.13   29.33   1-0.68188-0.79023 0.53775 0.32965-0.49583-0.51658
  -2  -1  -3  566.01   26.64   1-0.69504-0.64921-0.51141-0.67781-0.50533-0.34510
  -2  -1  -3  640.97   31.27   1-0.20861-0.16257-0.61643-0.78362-0.75926-0.59958
   2  -1   3  623.14   28.52   1-0.52519-0.41713 0.04856 0.25663 0.84959 0.87185
   2  -1   3  558.33   27.76   1-0.66351-0.55671 0.13206 0.34099 0.73641 0.75749
   2   1   3  606.49   28.82   1-0.72970-0.77660 0.24351 0.40963 0.63893 0.47862
  -2   1  -4  691.20   31.30   1-0.72215-0.81274 0.45052 0.19351-0.52489-0.54954
  -2  -1  -4  705.86   31.49   1-0.73106-0.66748-0.42804-0.64334-0.53133-0.37492
  -2  -1  -4  719.98   33.26   1 0.09389 0.15793-0.44120-0.65734-0.89247-0.73685
   2  -1   4  722.73   33.12   1-0.58416-0.49389-0.02267 0.23424 0.81131 0.83737
   2  -1   4  702.50   31.64   1-0.52805-0.43931-0.04527 0.21244 0.84800 0.87285
   2   1   4  678.15   31.47   1-0.67432-0.73930 0.14862 0.36351 0.72332 0.56681
  -2   1  -6 2291.93   84.37   1-0.75756-0.81270 0.35084-0.00403-0.55045-0.58266
  -2  -1  -6 2361.37   84.75   1-0.77108-0.67207-0.30263-0.61575-0.56021-0.41129
   2  -1   6 2415.39   93.24   1-0.67385-0.61917-0.14789 0.20673 0.72390 0.75754
   2   1   6 2234.52   82.43   1-0.55346-0.65165 0.01528 0.32840 0.83273 0.68373
   2  -1   6 2284.98   81.98   1-0.36892-0.31629-0.21093 0.14432 0.90520 0.93761
   2   1   6 2199.01   78.08   1-0.56715-0.66814 0.00139 0.31383 0.82361 0.67460
  -2   1  -7 6258.72  202.64   1-0.76490-0.80233 0.32563-0.07817-0.55576-0.59174
  -2  -1  -7 6402.38  190.63   1-0.78302-0.66627-0.25158-0.61363-0.56883-0.42371
   2  -1   7 6399.21  201.21   1-0.70760-0.67072-0.20326 0.20022 0.67673 0.71416
   2   1   7 5435.01  291.48   1-0.68242-0.79841-0.16138 0.20059 0.71291 0.56770
   2  -1   7 6580.51  210.57   1-0.31538-0.28081-0.25987 0.14415 0.91268 0.94887
   2   1   7 6625.50  208.12   1-0.51789-0.63694-0.05694 0.30427 0.85354 0.70832
  -2   1  -8 1813.68   65.21   1-0.76888-0.78858 0.31104-0.14169-0.55863-0.59838
  -2  -1  -8 1851.95   65.98   1-0.79185-0.65737-0.20514-0.61611-0.57521-0.43388
   2   1   8 1436.67   87.12   1-0.75546-0.88924-0.29657 0.11433 0.58421 0.44290
   2  -1   8 1982.17   69.79   1-0.73543-0.71635-0.25464 0.19770 0.62792 0.66914
   2  -1   8 1992.22   70.57   1-0.26992-0.25324-0.29922 0.15388 0.91520 0.95508
   2   1   8 1957.84   70.03   1-0.47159-0.60868-0.10802 0.30195 0.87517 0.73370
  -2   1  -9 4477.99  162.77   1-0.77064-0.77261 0.30434-0.19733-0.55989-0.60342
  -2  -1  -9 4345.98  150.78   1-0.79839-0.64617-0.16199-0.62188-0.57993-0.44240
   2  -1   9 4399.02  157.73   1-0.75801-0.75657-0.30232 0.19891 0.57793 0.62291
   2  -1   9 4475.95  155.06   1-0.22905-0.23040-0.33298 0.16893 0.91468 0.95831
   2   1   9 4415.44  163.71   1-0.42773-0.58288-0.15357 0.30517 0.89076 0.75307
  -2   1 -10 1664.54   90.47   1-0.77082-0.75507 0.30362-0.24698-0.56003-0.60733
  -2  -1 -10 1671.84   90.56   1-0.80312-0.63316-0.12122-0.63003-0.58334-0.44961
   2  -1  10 1681.00   90.41   1-0.77613-0.79246-0.34718 0.20291 0.52637 0.57516
   2  -1  10 1616.68   86.17   1-0.19124-0.21061-0.36293 0.18779 0.91197 0.95936
   2   1  10 1720.91   88.89   1-0.38592-0.55913-0.19476 0.31276 0.90173 0.76782
  -2   1 -11  257.05   20.74   1-0.76980-0.73633 0.30755-0.29198-0.55929-0.61037
  -2  -1 -11  258.05   17.28   1-0.80636-0.61866-0.08222-0.63995-0.58568-0.45575
   2  -1  11  261.35   15.59   1-0.79007-0.82418-0.38933 0.20962 0.47350 0.52609
   2  -1  11  274.89   17.72   1-0.15541-0.19280-0.39022 0.20932 0.90750 0.95864
   2   1  11  243.71   16.02   1-0.34576-0.53702-0.23246 0.32382 0.90907 0.77893
  -2   1 -12   -0.73   14.90   1-0.76778-0.71658 0.31514-0.33331-0.55783-0.61269
  -2  -1 -12    2.76   13.34   1-0.80829-0.60293-0.04464-0.65128-0.58708-0.46075
   2  -1  12    5.99    7.79   1-0.80010-0.85200-0.42903 0.21879 0.41923 0.47562
   2  -1  12    3.84    9.81   1-0.12088-0.17631-0.41553 0.23282 0.90151 0.95640
   2   1  12   -1.69   10.13   1-0.30709-0.51611-0.26719 0.33839 0.91339 0.78684
  -2   1 -13 1721.59   80.24   1-0.76489-0.69597 0.32570-0.37169-0.55575-0.61438
  -2  -1 -13 1694.81   75.13   1-0.80907-0.58599-0.00797-0.66353-0.58764-0.46510
   2  -1  13 1836.63   83.57   1-0.80640-0.87603-0.46648 0.23026 0.36346 0.42372
   2  -1  13 1722.68   77.47   1-0.08739-0.16075-0.43918 0.25790 0.89413 0.95270
   2   1  13 1773.51   79.18   1-0.26926-0.49630-0.29977 0.35462 0.91522 0.79241
  -2   1 -14 1039.52   32.81   1-0.76118-0.67454 0.33868-0.40764-0.55307-0.61548
  -2  -1 -14 1103.94   30.83   1-0.80878-0.56797 0.02793-0.67656-0.58743-0.46868
   2  -1  14 1052.58   39.35   1-0.80902-0.89642-0.50181 0.24379 0.30603 0.37011
   2  -1  14 1050.37   35.85   1-0.05421-0.14559-0.46176 0.28413 0.88534 0.94766
   2   1  14  951.57   30.04   1-0.23220-0.47727-0.33043 0.37277 0.91481 0.79576
  -2   1 -15 1728.28   92.16   1-0.75669-0.65232 0.35368-0.44157-0.54983-0.61602
  -2  -1 -15 1743.63   90.41   1-0.80748-0.54894 0.06326-0.69016-0.58649-0.47152
   2  -1  15 1560.71   88.67   1-0.02129-0.13069-0.48333 0.31137 0.87517 0.94125
   2   1  15 1866.03  101.28   1-0.19571-0.45880-0.35945 0.39256 0.91240 0.79711
  -2   1 -16  426.69   33.39   1-0.75143-0.62934 0.37039-0.47379-0.54603-0.61599
  -2  -1 -16  425.37   32.71   1-0.80518-0.52892 0.09816-0.70419-0.58483-0.47365
   2   1  16  428.51   33.06   1-0.15962-0.44073-0.38707 0.41375 0.90812 0.79658
  -2   1 -17  291.42   26.92   1-0.74538-0.60557 0.38858-0.50453-0.54166-0.61540
  -2  -1 -17  324.01   22.01   1-0.80192-0.50794 0.13275-0.71853-0.58248-0.47508
   2   1  17  285.61   27.17   1-0.12376-0.42290-0.41345 0.43618 0.90207 0.79428
   2   2 -16   58.89   15.45   1-0.69747-0.48372 0.50635-0.27803-0.50708-0.82988
   2  -2 -16   62.11   17.51   1-0.80596-0.28367-0.08796-0.78849-0.58539-0.54570
  -2   2  16   69.83   20.19   1 0.00078-0.52526-0.49734 0.19965 0.86755 0.82718
   2   2 -15   -9.83   14.12   1-0.70173-0.50570 0.49730-0.23816-0.51015-0.82918
   2  -2 -15    1.75   18.89   1-0.80147-0.29693-0.13684-0.78845-0.58215-0.53867
  -2  -2  15   -4.83   13.36   1-0.75659-0.95381-0.65311 0.08074-0.03170 0.28934
  -2  -2  15    3.68   13.50   1 0.33583 0.13508-0.66236 0.07139 0.66968 0.98825
  -2   2  15    7.99   14.33   1-0.02238-0.53041-0.48263 0.16555 0.87553 0.83141
   2   2 -14   39.23   12.20   1-0.70462-0.52632 0.49101-0.19552-0.51225-0.82749
   2  -2 -14   15.11   15.38   1-0.79473-0.30792-0.18741-0.79010-0.57729-0.53000
  -2  -2  14   37.01   13.73   1-0.76691-0.94641-0.64174 0.04320 0.00288 0.32005
  -2  -2  14   29.89   15.55   1 0.33088 0.14815-0.66064 0.02430 0.67384 0.98866
  -2   2  14   33.18   14.28   1-0.04479-0.53480-0.46802 0.13135 0.88257 0.83470
   2   2 -13  119.26   18.81   1-0.70599-0.54541 0.48801-0.14959-0.51323-0.82470
   2  -2 -13  115.93   18.79   1-0.78540-0.31633-0.24000-0.79377-0.57055-0.51947
  -2  -2  13  123.49   14.58   1-0.77554-0.93731-0.63031 0.00571 0.03512 0.34842
  -2  -2  13  131.67   17.02   1 0.32955 0.16484-0.66017-0.02403 0.67495 0.98602
  -2   2  13  123.19   16.89   1-0.06638-0.53837-0.45358 0.09698 0.88873 0.83710
   2   2 -12   92.31   14.34   1-0.70556-0.56270 0.48896-0.09970-0.51292-0.82062
   2  -2 -12  114.01   16.41   1-0.77302-0.32169-0.29498-0.79983-0.56162-0.50673
  -2  -2  12  121.32   14.22   1-0.78266-0.92672-0.61903-0.03192 0.06495 0.37437
  -2  -2  12  124.81   15.56   1 0.33251 0.18582-0.66121-0.07387 0.67247 0.97980
  -2   2  12  115.97   16.99   1-0.08708-0.54105-0.43940 0.06235 0.89405 0.83867
   2   2 -11    7.54   12.58   1-0.70292-0.57779 0.49472-0.04501-0.51102-0.81493
   2  -2 -11    8.25   11.24   1-0.75695-0.32323-0.35283-0.80860-0.55002-0.49160
  -2  -2  11    2.90   11.28   1-0.78846-0.91480-0.60811-0.06991 0.09224 0.39778
  -2  -2  11    8.48   11.45   1 0.34033 0.21172-0.66391-0.12528 0.66587 0.96926
  -2   2  11   -0.27    9.03   1-0.10693-0.54288-0.42549 0.02740 0.89862 0.83936
   2   2 -10    3.92    9.71   1-0.69745-0.59004 0.50638 0.01557-0.50707-0.80721
   2  -2 -10    1.75    8.52   1-0.73638-0.32041-0.41391-0.82077-0.53517-0.47293
  -2  -2  10    8.43    9.06   1-0.79290-0.90245-0.59826-0.10895 0.11570 0.41676
  -2  -2  10   -6.35   11.54   1 0.35472 0.24412-0.66872-0.17890 0.65343 0.95309
  -2   2  10    7.18   13.12   1-0.12553-0.54345-0.41217-0.00809 0.90241 0.83939
   2   2  -9 1637.23   78.19   1-0.68819-0.59851 0.52535 0.08347-0.50038-0.79675
   2  -2  -9 1537.67   71.16   1-0.71014-0.31193-0.47873-0.83668-0.51623-0.45017
  -2  -2   9 1634.92   79.94   1-0.79653-0.88831-0.58878-0.14833 0.13736 0.43461
  -2  -2   9 1548.05   73.77   1 0.37670 0.28412-0.67565-0.23465 0.63370 0.92962
  -2   2   9 1526.24   74.47   1-0.14282-0.54272-0.39955-0.04428 0.90551 0.83874
   2   2  -8   87.73   12.07   1-0.67362-0.60185 0.55339 0.16027-0.48987-0.78235
   2  -2  -8  103.63   12.32   1-0.67666-0.29620-0.54771-0.85675-0.49206-0.42218
  -2  -2   8   78.05   13.05   1-0.79925-0.87326-0.58047-0.18888 0.15570 0.44914
  -2   2   8   77.99   11.10   1-0.15854-0.54041-0.38787-0.08141 0.90797 0.83744
   2   2  -7    5.79    9.15   1-0.65139-0.59734 0.59259 0.24841-0.47382-0.76254
   2  -2  -7   -4.39    7.57   1-0.63379-0.27108-0.62102-0.88114-0.46112-0.38741
  -2   2   7   -1.59    6.40   1 0.21379-0.14969-0.35209-0.09238-0.91122-0.98440
  -2  -2   7   -7.48    8.53   1-0.80118-0.85742-0.57368-0.23096 0.17024 0.45987
  -2   2   7    1.08    9.15   1-0.17231-0.53616-0.37747-0.11982 0.90984 0.83556
   2   2  -7    0.61    6.81   1-0.44324-0.38614 0.69820 0.35522-0.56217-0.85130
   2   2  -6  144.03   13.93   1-0.61774-0.58141 0.64521 0.34996-0.44953-0.73449
   2  -2  -6  135.63   13.17   1-0.57870-0.23374-0.69826-0.90947-0.42135-0.34381
  -2   2   6   77.90   19.48   1 0.25569-0.08985-0.31814-0.10732-0.91290-0.99015
  -2  -2   6  152.09   14.00   1-0.80241-0.84087-0.56886-0.27501 0.18035 0.46615
  -2   2   6  145.39   13.54   1-0.18358-0.52940-0.36885-0.16001 0.91117 0.83314
   2   2  -6  140.90   11.62   1-0.49736-0.45834 0.70811 0.41391-0.50120-0.78650
   2   2  -5   10.78   10.78   1-0.56678-0.54823 0.71301 0.46670-0.41275-0.69399
   2  -2  -5   11.80    8.31   1-0.50780-0.18059-0.77788-0.94019-0.37017-0.28881
  -2   2   5    1.17    7.73   1 0.30259-0.02502-0.27829-0.11636-0.91158-0.99289
  -2  -2   5    8.71    8.66   1-0.80295-0.82363-0.56655-0.32156 0.18513 0.46713
  -2   2   5   13.11    9.01   1-0.19148-0.51928-0.36274-0.20271 0.91200 0.83021
   2   2  -5   11.00    7.45   1-0.56344-0.54251 0.71388 0.46847-0.41580-0.69728
   2   2  -4 1242.03   49.29   1-0.49057-0.48974 0.79458 0.59721-0.35773-0.63520
   2  -2  -4 1232.66   48.24   1-0.41712-0.10767-0.85624-0.96964-0.30472-0.21953
  -2   2   4 1275.76  120.19   1 0.35145 0.04176-0.23454-0.12150-0.90634-0.99171
  -2  -2   4 1274.74   51.05   1-0.80275-0.80567-0.56740-0.37127 0.18339 0.46157
  -2   2   4 1324.30   53.34   1-0.19463-0.50440-0.36029-0.24907 0.91230 0.82676
   2   2  -4 1316.68   51.55   1-0.63784-0.63500 0.70920 0.51258-0.30029-0.57795
  -2   2   3 5999.32  214.40   1 0.30573 0.01397 0.92704 0.99165 0.21705 0.12813
   2   2  -3 6190.47  207.89   1-0.37935-0.39621 0.88266 0.73433-0.27746-0.55114
  -2  -2   3 6382.73  226.90   1-0.80158-0.78671-0.57217-0.42491 0.17342 0.44779
  -2   2   3 5823.75  206.96   1-0.19065-0.48239-0.36339-0.30098 0.91191 0.82262
   2   2  -3 6336.46  222.47   1-0.71148-0.72672 0.68575 0.53792-0.15336-0.42720
  -2   2   2  607.33   29.72   1 0.16891-0.10516 0.97850 0.99412 0.11829 0.02569
   2   2  -2  634.05   30.95   1-0.22811-0.26258 0.95897 0.85963-0.16829-0.43827
  -2  -2   2  609.14   29.10   1-0.79884-0.76621-0.58179-0.48339 0.15282 0.42337
   2  -2  -2  624.09   27.52   1-0.45173-0.17825 0.12896 0.11350 0.88278 0.97741
  -2   2   2  609.69   30.57   1-0.17506-0.44878-0.37538-0.36177 0.91018 0.81713
   2   2  -2  643.17   30.41   1-0.77073-0.80406 0.63693 0.53788 0.01671-0.25329
  -2   2   1 2799.33  100.93   1 0.01559-0.24074 0.99984 0.96652 0.00762-0.08876
   2   2  -1 2785.00   99.99   1-0.04621-0.09843 0.99824 0.94783-0.03699-0.30316
  -2  -2   1 2561.36   93.90   1-0.79332-0.74291-0.59723-0.54769 0.11810 0.38484
   2  -2  -1 2504.28   93.30   1-0.49327-0.23758 0.08451 0.11790 0.86576 0.96418
  -2   2   1 2792.48  102.09   1-0.13850-0.39420-0.40273-0.43793 0.90477 0.80796
   2   2  -1 2788.93  102.19   1-0.80365-0.85506 0.56341 0.51312 0.19159-0.07459
   2   2   0  510.99   25.59   1 0.14025 0.07032 0.98529 0.98382 0.09760-0.16477
  -2   2   0  497.78   26.13   1-0.14087-0.37948 0.98440 0.90209-0.10532-0.20547
  -2  -2   0  479.32   23.43   1-0.78247-0.71389-0.61937-0.61922 0.06408 0.32697
   2  -2   0  494.33   23.75   1-0.53236-0.29447 0.04027 0.12252 0.84556 0.94777
  -2   2   0  471.56   25.92   1-0.05712-0.29485-0.45982-0.54378 0.88617 0.78572
   2   2   0  494.86   23.71   1-0.80726-0.87676 0.47407 0.47257 0.35154 0.08917
   2   2   1   88.66    9.70   1 0.30389 0.21628 0.92796 0.97538 0.21572-0.04291
  -2   2  -1   96.29   12.21   1-0.28400-0.50491 0.93584 0.80465-0.20863-0.31239
  -2  -2  -1   82.67    8.71   1-0.76113-0.67483-0.64837-0.69713-0.01693 0.24207
   2  -2   1   82.43    8.83   1-0.56875-0.34866-0.00337 0.12773 0.82249 0.92850
  -2   2  -1   78.35   11.30   1 0.14419-0.07550-0.57921-0.71199 0.80232 0.69811
   2   2   1   92.00    9.68   1-0.78747-0.87504 0.38069 0.42794 0.48472 0.22616
  -2   2  -2 4179.09  146.30   1-0.40270-0.60587 0.86672 0.68659-0.29431-0.40187
  -2  -2  -2 4007.66  138.13   1-0.42792-0.32283-0.84806-0.94469-0.31251-0.05773
  -2  -2  -2 3853.16  144.21   1-0.71908-0.61506-0.68163-0.77930-0.13525 0.11987
   2  -2   2 4116.66  142.28   1-0.60238-0.40008-0.04620 0.13376 0.79686 0.90666
   2   2   2 4134.42  150.16   1-0.75324-0.85890 0.29164 0.38760 0.58954 0.33472
  -2   2  -3 4206.94  146.38   1-0.49387-0.67937 0.79145 0.56232-0.36012-0.47143
  -2  -2  -3 4069.25  142.83   1-0.52448-0.40164-0.76080-0.90633-0.38222-0.13125
  -2  -2  -3 3625.07  135.36   1-0.63715-0.51460-0.70932-0.85592-0.30149-0.05061
   2  -2   3 4250.83  146.80   1-0.63325-0.44875-0.08806 0.14075 0.76891 0.88250
   2   2   3 4198.11  143.49   1-0.71180-0.83554 0.21062 0.35534 0.67004 0.41903
  -2   2  -4  188.52   16.88   1-0.56049-0.72825 0.72056 0.44249-0.40821-0.52329
  -2  -2  -4  174.92   13.62   1-0.59548-0.45489-0.67638-0.87083-0.43346-0.18633
  -2  -2  -4  169.49   14.43   1-0.47287-0.33239-0.70414-0.89970-0.52968-0.28292
   2  -2   4  170.49   12.99   1-0.66142-0.49471-0.12891 0.14876 0.73885 0.85622
   2   2   4  180.13   14.34   1-0.66772-0.80954 0.13845 0.33194 0.73141 0.48420
  -2   2  -5  753.81   35.33   1-0.60784-0.75792 0.65940 0.33245-0.44239-0.56127
  -2  -2  -5  741.10   32.65   1-0.64804-0.48970-0.59816-0.84152-0.47141-0.22809
  -2  -2  -5  739.87   34.75   1-0.16150-0.00283-0.59386-0.83813-0.78818-0.54545
   2  -2   5  756.08   33.65   1-0.68697-0.53806-0.16869 0.15783 0.70682 0.82799
   2  -2   5  667.00   31.46   1 0.12975 0.27736-0.57169-0.24367 0.81014 0.92934
   2   2   5  783.65   33.58   1-0.62363-0.78338 0.07473 0.31700 0.77813 0.53462
  -2   2  -6  156.34   13.24   1-0.64124-0.77359 0.60925 0.23337-0.46649-0.58914
  -2  -2  -6  158.91   14.38   1-0.68756-0.51146-0.52662-0.81888-0.49992-0.26044
   2  -2   6  150.37   11.82   1-0.70998-0.57887-0.20742 0.16797 0.67297 0.79792
   2  -2   6  146.73   12.43   1 0.04368 0.17329-0.52348-0.14667 0.85091 0.97388
   2   2   6  164.01   14.73   1-0.58021-0.75801 0.01767 0.30871 0.81427 0.57454
  -2   2  -7 2144.56   76.16   1-0.66457-0.77921 0.56984 0.14501-0.48334-0.60975
  -2  -2  -7 2133.43   71.57   1-0.71774-0.52389-0.46113-0.80231-0.52171-0.28605
   2  -2   7 2236.26   76.41   1-0.73053-0.61721-0.24509 0.17915 0.63738 0.76612
   2  -2   7 2140.15   76.21   1 0.01678 0.12838-0.50725-0.08163 0.86163 0.98835
   2   2   7 2182.60   75.96   1-0.53806-0.73392-0.03359 0.30620 0.84223 0.60629
  -2   2  -8 1178.22   49.14   1-0.68074-0.77766 0.53995 0.06619-0.49501-0.62518
  -2  -2  -8 1137.60   45.06   1-0.74112-0.52952-0.40080-0.79088-0.53859-0.30675
   2  -2   8 1071.64   44.52   1-0.74866-0.65313-0.28171 0.19138 0.60011 0.73265
   2  -2   8 1105.98   45.75   1 0.01183 0.10541-0.50421-0.02977 0.86349 0.99398
   2   2   8 1089.79   47.15   1-0.49729-0.71119-0.08007 0.30849 0.86387 0.63168
  -2   2  -9  569.52   33.97   1-0.69170-0.77077 0.51828-0.00431-0.50291-0.63709
  -2  -2  -9  567.70   32.56   1-0.75940-0.53004-0.34473-0.78372-0.55178-0.32377
   2  -2   9  532.98   31.27   1-0.76430-0.68635-0.31702 0.20495 0.56155 0.69778
   2  -2   9  550.14   31.68   1 0.01769 0.09324-0.50781 0.01542 0.86128 0.99552
   2   2   9  549.91   31.14   1-0.45772-0.68968-0.12269 0.31464 0.88058 0.65217
  -2   2 -10  214.23   19.29   1-0.69888-0.76024 0.50337-0.06816-0.50810-0.64605
  -2  -2 -10  215.25   18.58   1-0.77373-0.52675-0.29213-0.78007-0.56213-0.33767
   2  -2  10  197.96   15.86   1-0.77774-0.71757-0.35161 0.21922 0.52103 0.66107
   2  -2  10  204.37   15.13   1 0.02980 0.08734-0.51518 0.05686 0.85655 0.99455
   2   2  10  212.72   16.08   1-0.41925-0.66927-0.16209 0.32401 0.89328 0.66864
  -2   2 -11  100.79   13.11   1-0.70318-0.74681 0.49416-0.12630-0.51120-0.65293
  -2  -2 -11  105.59   15.21   1-0.78492-0.52021-0.24237-0.77922-0.57021-0.34955
   2  -2  11   98.10   12.37   1-0.78884-0.74645-0.38519 0.23450 0.47890 0.62274
   2  -2  11   98.57   13.14   1 0.04597 0.08549-0.52484 0.09601 0.84995 0.99170
   2   2  11  111.01   15.29   1-0.38170-0.64977-0.19880 0.33607 0.90265 0.68179
  -2   2 -12    3.52   12.33   1-0.70521-0.73111 0.48973-0.17966-0.51267-0.65817
  -2  -2 -12  -13.34   14.34   1-0.79355-0.51109-0.19491-0.78069-0.57643-0.35957
   2  -2  12    0.07    8.72   1-0.79759-0.77298-0.41776 0.25079 0.43510 0.58275
   2  -2  12   -2.85   10.73   1 0.06500 0.08650-0.53596 0.13371 0.84173 0.98723
   2   2  12   -4.54   14.06   1-0.34489-0.63102-0.23326 0.35039 0.90919 0.69211
  -2   2 -13  744.29   39.11   1-0.70540-0.71358 0.48932-0.22900-0.51280-0.66208
  -2  -2 -13  742.83   39.20   1-0.80001-0.49981-0.14934-0.78404-0.58109-0.36803
   2  -2  13  763.42   39.32   1-0.80393-0.79710-0.44932 0.26810 0.38961 0.54105
   2  -2  13  702.21   44.70   1 0.08619 0.08967-0.54801 0.17046 0.83201 0.98127
   2   2  13  823.33   42.28   1-0.30868-0.61287-0.26579 0.36663 0.91327 0.69997
  -2   2 -14    5.76   15.10   1-0.70404-0.69450 0.49229-0.27496-0.51182-0.66487
  -2  -2 -14   -0.01   16.80   1-0.80459-0.48666-0.10531-0.78893-0.58440-0.37514
   2  -2  14    3.52   11.21   1-0.80780-0.81866-0.47980 0.28653 0.34240 0.49768
   2   2  14    9.42   17.45   1-0.27311-0.59497-0.29652 0.38530 0.91514 0.70536
  -2   2 -15  539.96   31.42   1-0.70133-0.67406 0.49816-0.31803-0.50987-0.66669
  -2  -2 -15  497.05   25.69   1-0.80751-0.47184-0.06253-0.79508-0.58651-0.38105
   2  -2  15  503.91   30.33   1-0.80910-0.83774-0.50927 0.30592 0.29323 0.45232
   2   2  15  561.93   30.71   1-0.23768-0.57756-0.32598 0.40465 0.91500 0.70898
  -2   2 -16  316.18   21.59   1-0.69740-0.65241 0.50650-0.35862-0.50703-0.66763
  -2  -2 -16  336.07   21.44   1-0.80892-0.45560-0.02085-0.80230-0.58753-0.38566
   2   2  16  323.92   20.42   1-0.20245-0.56036-0.35418 0.42526 0.91299 0.71073
   2   3 -16  702.70   30.89   1-0.61708-0.48072 0.64618-0.15941-0.44905-0.86225
   2  -3 -16  859.36   33.64   1-0.79370-0.19440-0.19393-0.87359-0.57655-0.44613
  -2   3  16  792.76   31.82   1-0.03118-0.63406-0.47694 0.19866 0.87837 0.74732
   2   3 -15  124.84   23.60   1-0.61799-0.49935 0.64485-0.11180-0.44971-0.85915
   2  -3 -15  144.95   19.55   1-0.78410-0.20253-0.24642-0.87715-0.56961-0.43539
  -2  -3  15  123.89   17.16   1-0.77219-0.89274-0.63499 0.11940 0.02220 0.43445
  -2   3  15  135.18   20.41   1-0.05475-0.63962-0.46140 0.16539 0.88549 0.75068
   2   3 -14 1351.09   52.31   1-0.61676-0.51584 0.64664-0.06107-0.44883-0.85450
   2  -3 -14 1510.60   54.76   1-0.77167-0.20784-0.30033-0.88214-0.56064-0.42262
  -2  -3  14 1480.57   54.36   1-0.78011-0.88294-0.62331 0.08217 0.05386 0.46223
  -2   3  14 1399.20   53.78   1-0.07763-0.64447-0.44592 0.13207 0.89169 0.75313
   2   3 -13    1.93   13.45   1-0.61305-0.52985 0.65200-0.00677-0.44615-0.84806
   2  -3 -13   11.99   16.39   1-0.75601-0.20978-0.35589-0.88862-0.54934-0.40785
  -2  -3  13   -4.88   13.17   1-0.78665-0.87176-0.61173 0.04484 0.08336 0.48786
  -2   3  13   -9.89   14.98   1-0.09993-0.64872-0.43043 0.09869 0.89707 0.75459
   2   3 -12 1130.26   55.45   1-0.60640-0.54091 0.66143 0.05158-0.44134-0.83949
   2  -3 -12 1113.96   53.45   1-0.73667-0.20819-0.41312-0.89694-0.53538-0.39006
  -2  -3  12 1121.56   56.01   1-0.79181-0.86038-0.60082 0.00694 0.10970 0.50960
  -2   3  12 1086.61   52.59   1-0.12130-0.65206-0.41523 0.06508 0.90159 0.75536
   2   3 -12 1013.31   50.64   1-0.49910-0.42838 0.70836 0.10006-0.49912-0.89803
   2   3 -11   57.07   12.89   1-0.59615-0.54838 0.67548 0.11458-0.43395-0.82833
   2  -3 -11   57.18   15.63   1-0.71302-0.20230-0.47216-0.90707-0.51831-0.36917
  -2  -3  11   54.71   12.18   1-0.79611-0.84690-0.58995-0.03104 0.13475 0.53083
  -2   3  11   46.15   15.69   1-0.14182-0.65456-0.40029 0.03121 0.90534 0.75535
   2   3 -11   48.43   10.68   1-0.51649-0.46386 0.71056 0.15105-0.47783-0.87293
   2   3 -10 2160.08   68.40   1-0.58145-0.55141 0.69475 0.18278-0.42334-0.81396
   2  -3 -10 2062.06   60.89   1-0.68431-0.19133-0.53303-0.91903-0.49758-0.34461
  -2  -3  10 2065.61   65.72   1-0.79948-0.83250-0.57970-0.06966 0.15735 0.54962
  -2   3  10 1998.43   62.11   1-0.16141-0.65612-0.38572-0.00302 0.90838 0.75464
   2   3 -10 1861.84   66.21   1-0.54009-0.50555 0.71274 0.20202-0.44753-0.83881
   2   3  -9   26.50   15.14   1-0.56104-0.54876 0.71990 0.25686-0.40860-0.79553
   2  -3  -9   -7.45    9.19   1-0.64960-0.17437-0.59559-0.93268-0.47253-0.31573
  -2  -3   9    7.15    8.95   1-0.80205-0.81729-0.57031-0.10914 0.17733 0.56578
  -2   3   9   -0.70   14.94   1-0.17993-0.65662-0.37165-0.03776 0.91076 0.75326
   2   3  -9   -2.02    7.26   1-0.57034-0.55389 0.71401 0.25207-0.40606-0.79351
   2   3  -8 3249.76  166.70   1-0.53358-0.53903 0.75108 0.33698-0.38878-0.77193
   2  -3  -8 3119.96  158.57   1-0.60781-0.15033-0.65945-0.94763-0.44236-0.28174
  -2  -3   8 3145.26  159.33   1-0.80394-0.80141-0.56202-0.14971 0.19443 0.57907
  -2   3   8 2923.07  150.39   1-0.19722-0.65589-0.35827-0.07319 0.91254 0.75129
   2   3  -8 2954.25  154.69   1-0.60721-0.60884 0.71287 0.29972-0.35085-0.73448
   2   3  -7  750.21   41.75   1-0.49702-0.52020 0.78843 0.42327-0.36239-0.74177
   2  -3  -7  769.20   39.83   1-0.55769-0.11797-0.72386-0.96313-0.40619-0.24175
  -2  -3   7  797.60   41.48   1-0.80527-0.78496-0.55510-0.19165 0.20832 0.58915
  -2   3   7  709.12   38.90   1-0.21304-0.65369-0.34581-0.10953 0.91379 0.74879
   2   3  -7  745.32   39.08   1-0.64971-0.66943 0.70699 0.34263-0.27933-0.65913
   2   3  -6 5053.15  177.98   1-0.44904-0.48996 0.83121 0.51499-0.32776-0.70336
   2  -3  -6 4851.93  171.89   1-0.49797-0.07600-0.78752-0.97789-0.36307-0.19481
  -2  -3   6 5031.04  186.34   1-0.80612-0.76804-0.54989-0.23531 0.21858 0.59559
   2  -3  -6 4677.69  167.89   1-0.64166-0.22056-0.09998-0.29011 0.76043 0.93122
  -2   3   6 4795.70  167.62   1-0.22705-0.64967-0.33459-0.14713 0.91459 0.74583
   2   3  -6 5165.73  178.80   1-0.69534-0.73314 0.69321 0.37764-0.18959-0.56558
   2   3  -5    2.93    9.85   1-0.38704-0.44561 0.87755 0.61040-0.28301-0.65485
   2  -3  -5    9.97    8.91   1-0.42747-0.02326-0.84840-0.98986-0.31219-0.14010
  -2  -3   5    4.16    8.48   1-0.80658-0.75072-0.54677-0.28105 0.22464 0.59784
   2  -3  -5    2.54    5.12   1-0.62748-0.22417-0.08003-0.22130 0.77450 0.94908
  -2   3   5    4.82    9.29   1-0.23874-0.64334-0.32511-0.18645 0.91504 0.74252
   2   3  -5    4.95    6.70   1-0.73967-0.79556 0.66796 0.40117-0.08185-0.45401
  -2   3   4 2265.69   78.88   1 0.34828-0.03831 0.90405 0.99667 0.24776 0.07196
   2   3  -4 2293.49   77.51   1-0.30922-0.38552 0.92354 0.70533-0.22683-0.59487
  -2  -3   4 2289.20   78.31   1-0.80666-0.73303-0.54619-0.32934 0.22576 0.59514
   2  -3  -4 2149.61   76.31   1-0.62310-0.23759-0.07400-0.16641 0.77863 0.95700
  -2   3   4 2038.09   73.15   1-0.24734-0.63391-0.31805-0.22821 0.91523 0.73896
   2   3  -4 2220.73   78.06   1-0.77680-0.85078 0.62845 0.41045 0.04017-0.32816
  -2   3   3    8.92   11.46   1 0.25524-0.11363 0.94985 0.99352 0.18060 0.00104
   2   3  -3    9.84    8.14   1-0.21474-0.30859 0.96370 0.79446-0.15864-0.52305
  -2  -3   3   13.31    9.35   1-0.80630-0.71490-0.54868-0.38070 0.22093 0.58650
   2  -3  -3   10.83    5.78   1-0.62536-0.25765-0.07711-0.12067 0.77651 0.95867
  -2   3   3   11.02    6.88   1-0.25159-0.62013-0.31454-0.27351 0.91529 0.73526
   2   3  -3   10.53    7.64   1-0.80100-0.89305 0.57438 0.40514 0.16876-0.19574
  -2   3   2 6955.80  232.32   1 0.15289-0.19832 0.98246 0.97714 0.10672-0.07651
   2   3  -2 7133.70  235.52   1-0.10602-0.21763 0.99112 0.87083-0.08016-0.44077
  -2  -3   2 7231.06  241.13   1-0.80531-0.69613-0.55486-0.43574 0.20879 0.57055
   2  -3  -2 6915.69  231.67   1-0.63223-0.28232-0.08665-0.08135 0.76991 0.95586
  -2   3   2 6232.95  221.54   1-0.24933-0.59985-0.31641-0.32418 0.91526 0.73148
   2   3  -2 6956.84  238.05   1-0.80910-0.91924 0.50853 0.38807 0.29452-0.06616
  -2   3   1  179.44   16.80   1 0.04494-0.28853 0.99857 0.94430 0.02881-0.15821
   2   3  -1  173.82   14.83   1 0.01166-0.11766 0.99992 0.92856 0.00478-0.35202
  -2  -3   1  166.39   14.09   1-0.80321-0.67625-0.56541-0.49516 0.18748 0.54542
   2  -3  -1  159.02   12.63   1-0.64229-0.31017-0.10087-0.04672 0.75978 0.94953
  -2   3   1  176.47   13.97   1-0.23647-0.56896-0.32696-0.38355 0.91497 0.72743
   2   3  -1  164.24   12.77   1-0.80155-0.92976 0.43614 0.36443 0.40900 0.05213
   2   3   0 4913.73  168.03   1 0.13073-0.01634 0.98725 0.96485 0.09073-0.26229
  -2   3   0 4638.02  157.64   1-0.06362-0.37937 0.99674 0.89348-0.04956-0.24033
  -2  -3   0 4952.16  184.18   1-0.79907-0.65434-0.58107-0.55967 0.15439 0.50852
   2  -3   0 4772.80  171.27   1-0.65450-0.34017-0.11860-0.01559 0.74670 0.94023
  -2   3   0 4723.51  175.91   1-0.20410-0.51857-0.35288-0.45827 0.91313 0.72184
   2   3   0 4759.54  161.70   1-0.78150-0.92780 0.36233 0.33941 0.50790 0.15484
   2   3   1  241.16   17.14   1 0.24339 0.07865 0.95454 0.98102 0.17205-0.17723
  -2   3  -1  235.46   19.20   1-0.16705-0.46504 0.97809 0.82589-0.12421-0.31880
  -2  -3  -1  251.95   17.42   1-0.79109-0.62858-0.60247-0.62994 0.10580 0.45612
   2  -3   1  260.52   16.14   1-0.66806-0.37153-0.13897 0.01288 0.73100 0.92832
  -2   3  -1  214.08   17.90   1-0.12814-0.42458-0.41029-0.56449 0.90290 0.70786
   2   3   1  252.71   17.05   1-0.75297-0.91738 0.29103 0.31682 0.59019 0.24086
   2   3   2 8616.16  292.17   1 0.34455 0.16210 0.90621 0.98164 0.24507-0.10045
  -2   3  -2 8385.35  281.63   1-0.26074-0.54108 0.94615 0.74508-0.19184-0.38996
  -2  -3  -2 8660.19  297.28   1-0.77561-0.59492-0.63021-0.70734 0.03540 0.38174
   2  -3   2 8692.01  291.71   1-0.68240-0.40366-0.16135 0.03936 0.71294 0.91405
   2   3   2 8262.39  293.00   1-0.71941-0.90191 0.22429 0.29884 0.65736 0.31184
  -2   3  -3   47.90   12.46   1-0.34185-0.60446 0.90578 0.65577-0.25038-0.45230
  -2  -3  -3   54.77    9.58   1-0.42709-0.22724-0.84870-0.97338-0.31192 0.02976
  -2  -3  -3   41.39    7.89   1-0.74611-0.54771-0.66277-0.78881-0.06356 0.27889
   2  -3   3   55.84    8.93   1-0.69703-0.43609-0.18524 0.06433 0.69269 0.89759
   2   3   3   60.29   10.49   1-0.68329-0.88386 0.16277 0.28608 0.71177 0.37005
  -2   3  -4 2557.34   85.03   1-0.40947-0.65434 0.86186 0.56292-0.29920-0.50491
  -2  -3  -4 2601.54   87.86   1-0.50034-0.28274-0.78522-0.95881-0.36479-0.02692
  -2  -3  -4 2621.29   99.53   1-0.69033-0.47311-0.69521-0.87017-0.20027 0.13771
   2  -3   4 2682.19   93.68   1-0.71160-0.46845-0.21026 0.08817 0.67038 0.87907
   2   3   4 2488.57   89.18   1-0.64633-0.86483 0.10668 0.27877 0.75556 0.41754
  -2   3  -5   82.21   14.26   1-0.46431-0.69155 0.81831 0.47031-0.33878-0.54823
  -2  -3  -5   82.28   12.09   1-0.56088-0.32553-0.72009-0.94259-0.40849-0.07445
  -2  -3  -5   70.88    9.38   1-0.57599-0.34094-0.71404-0.93790-0.39796-0.06397
   2  -3   5   89.91   11.53   1-0.72580-0.50045-0.23611 0.11117 0.64610 0.85859
   2   3   5   78.04   12.97   1-0.60904-0.84560 0.05501 0.27587 0.79122 0.45699
  -2   3  -6 4753.86  166.92   1-0.50779-0.71730 0.77789 0.38095-0.37017-0.58339
  -2  -3  -6 4958.57  173.97   1-0.61060-0.35750-0.65549-0.92690-0.44438-0.11416
   2  -3   6 4726.28  171.08   1-0.73940-0.53185-0.26255 0.13359 0.61995 0.83623
   2   3   6 4721.40  170.98   1-0.57204-0.82666 0.00745 0.27709 0.82018 0.48974
  -2   3  -7  659.18   38.59   1-0.54177-0.73354 0.74209 0.29622-0.39469-0.61169
  -2  -3  -7  651.96   35.47   1-0.65137-0.38051-0.59263-0.91294-0.47381-0.14742
   2  -3   7  616.50   32.71   1-0.75220-0.56245-0.28937 0.15563 0.59198 0.81204
   2   3   7  686.59   36.35   1-0.53554-0.80821-0.03655 0.28184 0.84371 0.51705
  -2   3  -8 4591.05  227.82   1-0.56796-0.74200 0.71157 0.21677-0.41360-0.63437
  -2  -3  -8 4743.31  236.77   1-0.68482-0.39621-0.53202-0.90124-0.49795-0.17539
   2  -3   8 4633.43  237.20   1-0.76389-0.59167-0.31605 0.17779 0.56264 0.78632
   2   3   8 4527.72  230.52   1-0.49963-0.79034-0.07748 0.28968 0.86276 0.53985
  -2   3  -9   75.69   12.52   1-0.58784-0.74420 0.68650 0.14284-0.42795-0.65250
  -2  -3  -9   70.84   13.49   1-0.71230-0.40594-0.47382-0.89195-0.51779-0.19905
   2  -3   9   55.78   12.59   1-0.77465-0.62020-0.34319 0.19951 0.53115 0.75864
   2   3   9   87.84   15.89   1-0.46421-0.77298-0.11586 0.30007 0.87811 0.55897
  -2   3 -10 3068.82   89.94   1-0.60273-0.74137 0.66652 0.07392-0.43869-0.66701
  -2  -3 -10 2887.73   74.90   1-0.73488-0.41077-0.41795-0.88500-0.53409-0.21917
   2  -3  10 3020.60   87.32   1-0.78417-0.64750-0.37030 0.22126 0.49794 0.72923
   2   3  10 2946.08   88.12   1-0.42927-0.75609-0.15202 0.31268 0.89029 0.57493
  -2   3 -11    8.22   12.73   1-0.61354-0.73446 0.65130 0.00976-0.44650-0.67857
  -2  -3 -11    6.86   11.12   1-0.75339-0.41153-0.36425-0.88021-0.54745-0.23636
   2  -3  11   -2.37   11.43   1-0.79233-0.67344-0.39727 0.24315 0.46301 0.69810
   2   3  11    1.00   11.86   1-0.39472-0.73960-0.18626 0.32721 0.89972 0.58814
  -2   3 -12  865.40   47.25   1-0.62102-0.72422 0.64040-0.05007-0.45190-0.68774
  -2  -3 -12  861.73   44.41   1-0.76849-0.40902-0.31249-0.87739-0.55835-0.25075
   2  -3  12  846.81   45.06   1-0.79902-0.69791-0.42401 0.26528 0.42634 0.66523
   2   3  12  833.24   43.61   1-0.36049-0.72342-0.21883 0.34341 0.90672 0.59893
  -2   3 -13  471.22   30.09   1-0.62574-0.71122 0.63335-0.10606-0.45530-0.69491
  -2  -3 -13  531.02   30.95   1-0.78068-0.40346-0.26245-0.87627-0.56714-0.26335
   2  -3  13  550.26   31.73   1-0.80411-0.72079-0.45044 0.28771 0.38792 0.63062
   2   3  13  523.51   32.84   1-0.32649-0.70748-0.24995 0.36106 0.91154 0.60753
  -2   3 -14 2357.01   64.33   1-0.62813-0.69590 0.62973-0.15862-0.45703-0.70039
  -2  -3 -14 2425.88   48.96   1-0.79033-0.39538-0.21391-0.87665-0.57411-0.27412
   2  -3  14 2373.62   53.27   1-0.80749-0.74181-0.47640 0.31064 0.34783 0.59431
   2   3  14 2251.48   77.58   1-0.29283-0.69149-0.27963 0.38080 0.91435 0.61385
  -2   3 -15  145.58   24.54   1-0.62851-0.67856 0.62915-0.20813-0.45730-0.70443
  -2  -3 -15  126.43   17.30   1-0.79776-0.38507-0.16666-0.87833-0.57947-0.28328
   2  -3  15  142.12   18.63   1-0.80902-0.76112-0.50198 0.33393 0.30574 0.55604
   2   3  15  120.00   15.96   1-0.25905-0.67574-0.30834 0.40091 0.91532 0.61857
  -2   3 -16 1360.95   45.02   1-0.62711-0.65944 0.63127-0.25495-0.45630-0.70719
  -2  -3 -16 1358.84   46.06   1-0.80319-0.37276-0.12052-0.88111-0.58339-0.29100
   2   3  16 1372.92   41.87   1-0.22528-0.65999-0.33602 0.42204 0.91451 0.62151
   2   4 -14  137.54   18.50   1-0.51357-0.48983 0.77207 0.04336-0.37434-0.87073
   2  -4 -14  161.26   20.43   1-0.74748-0.10648-0.38238-0.94317-0.54318-0.31478
  -2  -4  14  119.04   20.96   1-0.78485-0.81100-0.61514 0.11089 0.07485 0.57442
  -2   4  14  130.58   18.83   1-0.09254-0.73615-0.43561 0.12095 0.89536 0.66591
   2   4 -13   93.74   19.49   1-0.50495-0.49894 0.78070 0.10093-0.36812-0.86073
   2  -4 -13   91.86   21.53   1-0.72739-0.10415-0.43747-0.94934-0.52868-0.29646
  -2  -4  13   77.96   17.33   1-0.79029-0.79872-0.60425 0.07286 0.10156 0.59726
  -2   4  13   89.01   16.47   1-0.11432-0.73991-0.42023 0.08751 0.90018 0.66698
   2   4 -12  347.47   26.88   1-0.49275-0.50447 0.79251 0.16167-0.35931-0.84815
   2  -4 -12  330.01   26.21   1-0.70356-0.09807-0.49334-0.95630-0.51148-0.27543
  -2  -4  12  303.15   22.00   1-0.79457-0.78660-0.59406 0.03442 0.12540 0.61649
  -2   4  12  333.77   26.25   1-0.13531-0.74287-0.40507 0.05386 0.90421 0.66725
   2   4 -11    5.57   18.91   1-0.47638-0.50584 0.80765 0.22574-0.34750-0.83256
   2  -4 -11    4.09   14.93   1-0.67553-0.08779-0.54984-0.96389-0.49124-0.25137
  -2  -4  11   11.36   11.02   1-0.79812-0.77237-0.58405-0.00442 0.14786 0.63514
  -2   4  11   19.24   15.75   1-0.15543-0.74497-0.39020 0.01992 0.90751 0.66680
   2   4 -10   19.27   16.49   1-0.45514-0.50233 0.82613 0.29317-0.33216-0.81345
   2  -4 -10   19.89   12.32   1-0.64280-0.07282-0.60673-0.97188-0.46762-0.22392
  -2  -4  10   16.30   13.71   1-0.80090-0.75738-0.57473-0.04396 0.16802 0.65149
  -2   4  10   13.54   12.26   1-0.17460-0.74611-0.37573-0.01441 0.91012 0.66566
   2   4  -9   14.92   14.10   1-0.42820-0.49312 0.84785 0.36382-0.31271-0.79022
   2  -4  -9   29.43   13.05   1-0.60483-0.05260-0.66361-0.97984-0.44021-0.19269
  -2  -4   9   12.73   16.14   1-0.80301-0.74171-0.56627-0.08437 0.18572 0.66538
  -2   4   9    7.30   13.93   1-0.19270-0.74619-0.36179-0.04928 0.91212 0.66389
   2   4  -8    8.90   12.89   1-0.39452-0.47705 0.87245 0.43755-0.28841-0.76220
   2  -4  -8    7.34   13.30   1-0.56107-0.02660-0.71986-0.98719-0.40863-0.15728
  -2  -4   8   11.15   14.37   1-0.80457-0.72549-0.55888-0.12584 0.20077 0.67661
  -2   4   8    2.95   13.20   1-0.20959-0.74506-0.34854-0.08484 0.91355 0.66157
   2   4  -7   14.59   15.52   1-0.35336-0.45363 0.89900 0.51304-0.25869-0.72869
   2  -4  -7   11.06   12.11   1-0.51102 0.00570-0.77465-0.99307-0.37250-0.11733
  -2  -4   7   22.14    9.52   1-0.80566-0.70881-0.55278-0.16861 0.21291 0.68494
  -2   4   7   18.12   11.84   1-0.22505-0.74250-0.33620-0.12131 0.91450 0.65876
   2   4  -7   14.20    8.53   1-0.77954-0.87607 0.62423 0.23849 0.05143-0.41905
   2   4  -6 1543.44   46.98   1-0.30376-0.42177 0.92630 0.58928-0.22289-0.68909
   2  -4  -6 1476.57   41.79   1-0.45429 0.04467-0.82685-0.99636-0.33155-0.07255
  -2  -4   6 1569.19   48.44   1-0.80637-0.69174-0.54823-0.21292 0.22181 0.69003
   2  -4  -6 1307.22   46.61   1-0.75540-0.25786-0.29642-0.46580 0.58437 0.84648
  -2   4   6 1517.77   47.46   1-0.23880-0.73822-0.32506-0.15898 0.91504 0.65555
   2   4  -6 1507.51   45.75   1-0.79705-0.91164 0.58728 0.25031 0.14071-0.32594
  -2   4   5   -1.17   12.89   1 0.39371-0.08773 0.87537 0.99598 0.28055 0.01787
   2   4  -5   -0.35   12.41   1-0.24516-0.38091 0.95251 0.66442-0.18060-0.64300
  -2  -4   5   -5.09    8.93   1-0.80675-0.67435-0.54552-0.25907 0.22706 0.69146
   2  -4  -5   -0.51    6.25   1-0.73870-0.25896-0.26113-0.38165 0.62138 0.88728
  -2   4   5    2.85   11.36   1-0.25041-0.73180-0.31552-0.19824 0.91527 0.65203
   2   4  -5   14.21    9.67   1-0.80722-0.93991 0.54177 0.25358 0.23424-0.22859
  -2   4   4  479.92   29.01   1 0.32365-0.14006 0.91779 0.98947 0.22998-0.03646
   2   4  -4  458.34   29.88   1-0.17739-0.33063 0.97529 0.73617-0.13168-0.59052
  -2  -4   4  426.23   25.46   1-0.80682-0.65665-0.54497-0.30739 0.22811 0.68870
   2  -4  -4  457.87   27.25   1-0.72765-0.26571-0.23960-0.31127 0.64273 0.91241
  -2   4   4  418.84   26.17   1-0.25928-0.72264-0.30815-0.23969 0.91532 0.64832
   2   4  -4  479.51   27.88   1-0.80849-0.95927 0.48919 0.24979 0.32713-0.13187
  -2   4   3  242.83   20.23   1 0.24779-0.19821 0.95283 0.97554 0.17523-0.09498
   2   4  -3  248.84   19.92   1-0.10158-0.27258 0.99184 0.80166-0.07695-0.53200
  -2  -4   3  249.12   18.04   1-0.80655-0.63860-0.54696-0.35824 0.22428 0.68105
   2  -4  -3  215.56   16.67   1-0.72130-0.27715-0.22774-0.25055 0.65410 0.92758
  -2   4   3  198.29   16.88   1-0.26446-0.70980-0.30382-0.28416 0.91528 0.64453
   2   4  -3  224.42   16.94   1-0.80074-0.96958 0.43206 0.24140 0.41488-0.04030
  -2   4   2  516.50   27.78   1 0.16754-0.26081 0.97886 0.95260 0.11730-0.15658
   2   4  -2  574.43   28.04   1-0.01935-0.20808 0.99965 0.85841-0.01760-0.46884
  -2  -4   2  581.15   30.15   1-0.80580-0.62008-0.55190-0.41205 0.21464 0.66761
   2  -4  -2  572.40   27.63   1-0.71874-0.29239-0.22307-0.19701 0.65851 0.93578
  -2   4   2  531.02   28.61   1-0.26442-0.69173-0.30385-0.33301 0.91528 0.64078
   2   4  -2  550.33   26.93   1-0.78503-0.97197 0.37296 0.23108 0.49458 0.04321
  -2   4   1  381.80   23.14   1 0.08490-0.32570 0.99471 0.91951 0.05765-0.22001
   2   4  -1  412.14   23.43   1 0.06669-0.13977 0.99677 0.90448 0.04450-0.40294
  -2  -4   1  409.37   23.36   1-0.80430-0.60080-0.56025-0.46926 0.19801 0.64716
   2  -4  -1  411.04   22.07   1-0.71921-0.31066-0.22393-0.14902 0.65770 0.93876
  -2   4   1  383.52   22.88   1-0.25648-0.66577-0.31048-0.38845 0.91532 0.63705
   2   4  -1  425.16   22.85   1-0.76310-0.96820 0.31416 0.22103 0.56476 0.11712
   2   4   0  784.97   36.05   1 0.15341-0.07079 0.98234 0.93899 0.10710-0.33656
  -2   4   0  796.54   38.14   1 0.00229-0.39058 0.99999 0.87584-0.00197-0.28344
  -2  -4   0  848.76   37.97   1-0.80150-0.58022-0.57249-0.53037 0.17275 0.61809
   2  -4   0  765.17   34.77   1-0.72206-0.33130-0.22915-0.10538 0.65276 0.93761
  -2   4   0  745.95   35.39   1-0.23544-0.62671-0.32780-0.45458 0.91493 0.63292
   2   4   0  779.96   34.66   1-0.73689-0.96007 0.25752 0.21315 0.62503 0.18119
   2   4   1  974.01   43.10   1 0.23760-0.00425 0.95674 0.96227 0.16787-0.27205
  -2   4  -1  939.63   40.47   1-0.07787-0.45301 0.99516 0.82201-0.05984-0.34505
  -2  -4  -1 1034.59   45.84   1-0.79642-0.55737-0.58909-0.59583 0.13667 0.57819
   2  -4   1  974.56   42.49   1-0.72673-0.35377-0.23787-0.06524 0.64441 0.93305
  -2   4  -1  872.41   40.17   1-0.18935-0.56260-0.36439-0.53998 0.91178 0.62601
   2   4   1  970.43   41.21   1-0.70788-0.94913 0.20374 0.20812 0.67630 0.23627
   2   4   2 1573.10   75.26   1 0.31698 0.05740 0.92131 0.97579 0.22517-0.21100
  -2   4  -2 1424.80   70.03   1-0.15310-0.51049 0.98159 0.75950-0.11415-0.40316
  -2  -4  -2 1497.21   72.57   1-0.78718-0.52983-0.61069-0.66728 0.08592 0.52346
   2  -4   2 1404.13   70.23   1-0.73277-0.37759-0.24942-0.02794 0.63311 0.92554
   2   4   2 1480.25   72.44   1-0.67720-0.93653 0.15313 0.20628 0.71968 0.28345
   2   4   3  238.71   18.43   1 0.38965 0.11234 0.87811 0.98154 0.27762-0.15478
  -2   4  -3  241.02   21.36   1-0.22176-0.56138 0.96126 0.69023-0.16370-0.45652
  -2  -4  -3  192.34   18.52   1-0.77084-0.49577-0.63679-0.74228 0.01714 0.45080
   2  -4   3  228.11   18.80   1-0.73976-0.40239-0.26327 0.00706 0.61922 0.91544
   2   4   3  221.16   18.83   1-0.64582-0.92308 0.10595 0.20787 0.75609 0.32357
  -2   4  -4    2.86   10.24   1-0.28279-0.60484 0.93640 0.61652-0.20776-0.50404
  -2  -4  -4    0.65   10.54   1-0.45054-0.15593-0.82998-0.98271-0.32884 0.09975
  -2  -4  -4    1.72    7.33   1-0.74154-0.44874-0.66651-0.82091-0.07663 0.35314
   2  -4   4    1.25    8.59   1-0.74738-0.42780-0.27901 0.04018 0.60296 0.90297
   2   4   4    1.09    8.53   1-0.61387-0.90919 0.06147 0.21216 0.78700 0.35827
  -2   4  -5  227.70   19.69   1-0.33578-0.64009 0.90924 0.54042-0.24601-0.54608
  -2  -4  -5  226.82   19.41   1-0.50820-0.19584-0.77748-0.97913-0.37046 0.05430
  -2  -4  -5  198.06   17.05   1-0.68924-0.37734-0.69563-0.89893-0.20257 0.22253
   2  -4   5  228.06   19.42   1-0.75533-0.45355-0.29628 0.07176 0.58453 0.88833
   2   4   5  204.61   18.44   1-0.58179-0.89516 0.01966 0.21913 0.81309 0.38815
  -2   4  -6   79.01   16.13   1-0.38091-0.66749 0.88164 0.46389-0.27858-0.58245
  -2  -4  -6   94.54   12.14   1-0.55850-0.22839-0.72291-0.97346-0.40677 0.01417
   2  -4   6   73.85   11.40   1-0.76319-0.47891-0.31437 0.10248 0.56453 0.87186
   2   4   6   88.84   15.62   1-0.54973-0.88116-0.01975 0.22847 0.83510 0.41394
  -2   4  -7   10.58   13.82   1-0.41871-0.68755 0.85505 0.38837-0.30587-0.61354
  -2  -4  -7   76.73   16.81   1-0.60205-0.25418-0.66746-0.96692-0.43820-0.02108
   2  -4   7   17.35    9.82   1-0.77111-0.50461-0.33392 0.13179 0.54210 0.85322
   2   4   7   21.80   13.85   1-0.51777-0.86726-0.05708 0.23992 0.85361 0.43623
  -2   4  -8  180.72   17.97   1-0.44994-0.70118 0.83047 0.31468-0.32841-0.63977
  -2  -4  -8  198.67   15.15   1-0.63953-0.27392-0.61197-0.96034-0.46526-0.05197
   2  -4   8  179.71   13.72   1-0.77869-0.52997-0.35428 0.16029 0.51779 0.83272
   2   4   8  177.08   17.67   1-0.48597-0.85349-0.09250 0.25325 0.86906 0.45543
  -2   4  -9 1101.29   60.33   1-0.47533-0.70883 0.80860 0.24387-0.34673-0.66187
  -2  -4  -9 1075.17   56.33   1-0.67168-0.28831-0.55699-0.95427-0.48846-0.07899
   2  -4   9 1050.61   55.03   1-0.78577-0.55482-0.37526 0.18818 0.49167 0.81040
   2   4   9 1051.24   56.76   1-0.45423-0.83980-0.12635 0.26817 0.88187 0.47202
  -2   4 -10  122.04   19.30   1-0.49566-0.71144 0.78974 0.17607-0.36141-0.68032
  -2  -4 -10  114.73   15.86   1-0.69914-0.29801-0.50283-0.94902-0.50828-0.10264
   2  -4  10  100.61   12.95   1-0.79217-0.57900-0.39671 0.21559 0.46376 0.78629
   2   4  10   99.24   13.02   1-0.42257-0.82620-0.15876 0.28453 0.89231 0.48623
  -2   4 -11  255.30   24.41   1-0.51165-0.70969 0.77402 0.11142-0.37295-0.69564
  -2  -4 -11  244.27   19.02   1-0.72250-0.30362-0.44967-0.94477-0.52515-0.12332
   2  -4  11  246.29   17.59   1-0.79776-0.60237-0.41849 0.24267 0.43409 0.76043
   2   4  11  238.99   23.89   1-0.39095-0.81264-0.18991 0.30215 0.90060 0.49830
  -2   4 -12   58.19   17.37   1-0.52388-0.70419 0.76143 0.04989-0.38178-0.70824
  -2  -4 -12   75.26   14.46   1-0.74226-0.30563-0.39758-0.94158-0.53941-0.14141
   2  -4  12   56.31   13.81   1-0.80238-0.62477-0.44049 0.26953 0.40266 0.73280
   2   4  12   67.61   13.90   1-0.35933-0.79908-0.21991 0.32092 0.90692 0.50840
  -2   4 -13   56.12   17.87   1-0.53287-0.69545 0.75185-0.00862-0.38827-0.71851
  -2  -4 -13   69.45   14.83   1-0.75886-0.30448-0.34653-0.93945-0.55139-0.15722
   2  -4  13   74.69   20.06   1-0.80591-0.64608-0.46260 0.29629 0.36946 0.70341
   2   4  13   67.65   21.02   1-0.32766-0.78546-0.24890 0.34070 0.91141 0.51667
  -2   4 -14  145.79   25.57   1-0.53904-0.68389 0.74511-0.06430-0.39272-0.72674
  -2  -4 -14  159.71   17.90   1-0.77265-0.30067-0.29647-0.93833-0.56134-0.17062
   2  -4  14  128.12   16.14   1-0.80818-0.66596-0.48459 0.32318 0.33465 0.67234
   2   4  14  167.36   18.31   1-0.29609-0.77155-0.27680 0.36226 0.91416 0.52293
   2   5 -13 1230.27   49.62   1-0.39130-0.46233 0.87466 0.17415-0.28608-0.86943
   2  -5 -13 1276.35   38.27   1-0.70468-0.00444-0.49088-0.98190-0.51229-0.18934
  -2  -5  13 1188.77   36.25   1-0.78983-0.72160-0.60523 0.09242 0.09920 0.68611
  -2   5  13 1195.56   42.14   1-0.11256-0.81494-0.42149 0.06487 0.89981 0.57588
   2   5 -12  624.49   34.29   1-0.37559-0.46436 0.88512 0.23355-0.27474-0.85429
   2  -5 -12  771.49   39.63   1-0.67869 0.00380-0.54388-0.98599-0.49352-0.16675
  -2  -5  12  758.84   39.79   1-0.79376-0.70924-0.59613 0.05308 0.12065 0.70295
  -2   5  12  736.89   35.90   1-0.13250-0.81686-0.40712 0.03043 0.90371 0.57602
   2   5 -11  942.21   64.61   1-0.35583-0.46234 0.89751 0.29487-0.26048-0.83623
   2  -5 -11  916.28   59.30   1-0.64898 0.01575-0.59661-0.98981-0.47208-0.14148
  -2  -5  11  900.11   60.52   1-0.79704-0.69474-0.58731 0.01303 0.14064 0.71913
  -2   5  11  958.21   63.45   1-0.15147-0.81781-0.39315-0.00440 0.90690 0.57546
   2   5 -10 1045.52   59.44   1-0.33159-0.45583 0.91159 0.35788-0.24298-0.81494
   2  -5 -10 1012.91   55.80   1-0.61530 0.03168-0.64876-0.99304-0.44777-0.11335
  -2  -5  10 1046.33   59.09   1-0.79963-0.67956-0.57921-0.02772 0.15841 0.73309
  -2   5  10 1092.03   62.29   1-0.16938-0.81769-0.37970-0.03976 0.90946 0.57427
   2   5  -9 1797.82   82.43   1-0.30243-0.44440 0.92697 0.42220-0.22193-0.79009
   2  -5  -9 1842.50   78.14   1-0.57740 0.05182-0.69989-0.99527-0.42041-0.08216
  -2  -5   9 1814.08   80.12   1-0.80163-0.66378-0.57198-0.06935 0.17383 0.74469
  -2   5   9 1825.01   80.31   1-0.18610-0.81639-0.36691-0.07577 0.91144 0.57249
   2   5  -8  316.98   21.03   1-0.26793-0.42764 0.94307 0.48723-0.19703-0.76139
   2  -5  -8  301.88   19.00   1-0.53508 0.07640-0.74945-0.99593-0.38986-0.04779
  -2  -5   8  335.65   24.36   1-0.80312-0.64751-0.56578-0.11202 0.18672 0.75377
  -2   5   8  297.67   19.68   1-0.20147-0.81373-0.35494-0.11262 0.91291 0.57021
   2   5  -7 1651.79   74.55   1-0.22760-0.40472 0.95916 0.55228-0.16792-0.72881
   2  -5  -7 1577.51   70.67   1-0.48820 0.10552-0.79680-0.99436-0.35603-0.01013
  -2  -5   7 1476.96   67.26   1-0.80419-0.63080-0.56081-0.15591 0.19688 0.76011
  -2   5   7 1499.34   68.72   1-0.21526-0.80950-0.34404-0.15053 0.91394 0.56748
   2   5  -6  439.65   31.79   1-0.18161-0.37649 0.97409 0.61615-0.13472-0.69181
   2  -5  -6  447.29   28.37   1-0.43678 0.13919-0.84113-0.98978-0.31891 0.03080
  -2  -5   6  452.25   30.28   1-0.80488-0.61371-0.55725-0.20122 0.20403 0.76345
  -2   5   6  477.07   29.01   1-0.22718-0.80339-0.33449-0.18979 0.91460 0.56439
  -2   5   5 1744.80   55.65   1 0.38417-0.17439 0.88176 0.98144 0.27367-0.07966
   2   5  -5 1702.01   53.76   1-0.12987-0.34250 0.98673 0.67773-0.09737-0.65066
  -2  -5   5 1738.48   51.67   1-0.80522-0.59628-0.55534-0.24818 0.20783 0.76344
   2  -5  -5 1588.55   60.00   1-0.78523-0.22888-0.37359-0.47349 0.49378 0.85054
  -2   5   5 1677.55   54.65   1-0.23678-0.79497-0.32670-0.23081 0.91498 0.56101
  -2   5   4 1965.86   58.69   1 0.32447-0.21637 0.91735 0.96807 0.23058-0.12651
   2   5  -4 2109.06   60.35   1-0.07279-0.30318 0.99576 0.73570-0.05617-0.60565
  -2  -5   4 2024.59   58.47   1-0.80523-0.57851-0.55532-0.29702 0.20787 0.75967
   2  -5  -4 2092.16   66.53   1-0.77666-0.23808-0.34862-0.39965 0.52465 0.88520
  -2   5   4 1982.85   57.07   1-0.24348-0.78364-0.32123-0.27415 0.91516 0.55743
  -2   5   3 3973.44  176.14   1 0.26151-0.26161 0.94727 0.94904 0.18513-0.17572
   2   5  -3 4134.54  184.01   1-0.01115-0.25928 0.99986 0.78874-0.01168-0.55736
  -2  -5   3 4204.54  189.95   1-0.80484-0.56035-0.55747-0.34803 0.20360 0.75158
   2  -5  -3 4106.75  185.81   1-0.77026-0.24947-0.33176-0.33393 0.54462 0.90898
  -2   5   3 3670.74  169.23   1-0.24635-0.76849-0.31887-0.32060 0.91522 0.55374
   2   5  -3 3583.82  170.08   1-0.75026-0.99604 0.28515 0.07308 0.59648 0.05051
  -2   5   2  443.48   29.88   1 0.19622-0.30926 0.97079 0.92360 0.13800-0.22651
   2   5  -2  457.99   28.40   1 0.05394-0.21192 0.99791 0.83574 0.03530-0.50657
  -2  -5   2  473.32   27.55   1-0.80393-0.54167-0.56206-0.40148 0.19434 0.73851
   2  -5  -2  473.67   28.10   1-0.76605-0.26303-0.32126-0.27457 0.55673 0.92488
  -2   5   2  464.46   28.08   1-0.24398-0.74810-0.32081-0.37135 0.91517 0.54994
   2   5  -2  461.09   28.64   1-0.72816-0.99201 0.24056 0.07726 0.64180 0.09964
   2   5  -1 1551.64   72.54   1 0.12106-0.16253 0.98910 0.87587 0.08375-0.45433
  -2   5   1 1522.00   73.30   1 0.12978-0.35797 0.98744 0.89130 0.09004-0.27826
  -2  -5   1 1595.48   75.85   1-0.80227-0.52223-0.56941-0.45770 0.17921 0.71956
   2  -5  -1 1511.06   73.62   1-0.76382-0.27858-0.31588-0.22033 0.56283 0.93479
  -2   5   1 1463.01   73.68   1-0.23400-0.72009-0.32897-0.42832 0.91488 0.54589
   2   5  -1 1608.33   76.16   1-0.70422-0.98615 0.19741 0.08287 0.68198 0.14363
   2   5   0  351.40   17.85   1 0.18864-0.11269 0.97306 0.90877 0.13253-0.40177
  -2   5   0  376.99   24.23   1 0.06349-0.40651 0.99708 0.85200 0.04219-0.32990
  -2  -5   0  397.91   26.23   1-0.79944-0.50162-0.57984-0.51699 0.15705 0.69360
   2  -5   0  391.72   24.84   1-0.76333-0.29587-0.31470-0.17028 0.56416 0.93992
   2   5   0  410.96   26.12   1-0.67898-0.97899 0.15593 0.09015 0.71739 0.18285
   2   5   1 1543.18   72.58   1 0.25503-0.06394 0.94994 0.93451 0.18045-0.35012
  -2   5  -1 1477.03   72.06   1-0.00127-0.45354 0.99998 0.80595-0.00455-0.38044
  -2  -5  -1 1629.21   78.64   1-0.79474-0.47915-0.59364-0.57966 0.12636 0.65909
   2  -5   1 1594.36   76.92   1-0.76430-0.31462-0.31702-0.12374 0.56155 0.94111
   2   5   1 1604.58   79.33   1-0.65302-0.97097 0.11643 0.09941 0.74833 0.21753
   2   5   2 1352.34   66.90   1 0.31910-0.01759 0.92020 0.95374 0.22670-0.30011
  -2   5  -2 1245.20   60.45   1-0.06331-0.49784 0.99677 0.75374-0.04933-0.42898
   2  -5   2 1108.37   59.43   1-0.76646-0.33456-0.32225-0.08011 0.55559 0.93896
   2   5   2 1305.47   64.46   1-0.62630-0.96232 0.07840 0.11016 0.77562 0.24860
   2   5   3 4837.04  211.78   1 0.37964 0.02522 0.88473 0.96722 0.27040-0.25265
  -2   5  -3 4124.84  178.49   1-0.12140-0.53817 0.98839 0.69643-0.09126-0.47471
  -2  -5  -3 4373.50  198.32   1-0.77402-0.42227-0.63248-0.71743 0.02918 0.55405
   2  -5   3 4365.76  197.61   1-0.76955-0.35543-0.32996-0.03896 0.54671 0.93388
   2   5   3 4402.46  195.93   1-0.59916-0.95323 0.04198 0.12250 0.79952 0.27628
  -2   5  -4  416.94   23.51   1-0.17481-0.57383 0.97600 0.63509-0.12982-0.51707
  -2  -5  -4  418.65   20.30   1-0.43159-0.05997-0.84522-0.97709-0.31516 0.20415
   2  -5   4  410.38   22.28   1-0.77335-0.37701-0.33976 0.00010 0.53523 0.92620
   2   5   4  432.94   23.44   1-0.57170-0.94383 0.00703 0.13632 0.82042 0.30097
  -2   5  -5 1121.70   41.25   1-0.22306-0.60432 0.96079 0.57095-0.16464-0.55570
  -2  -5  -5 1108.51   37.19   1-0.48330-0.09393-0.80135-0.98214-0.35249 0.16301
   2  -5   5 1060.86   38.65   1-0.77764-0.39907-0.35133 0.03739 0.52138 0.91615
   2   5   5 1202.52   41.83   1-0.54401-0.93420-0.02657 0.15148 0.83865 0.32298
  -2   5  -6  650.71   38.71   1-0.26598-0.62974 0.94391 0.50522-0.19562-0.59006
  -2  -5  -6  624.28   36.53   1-0.53018-0.12306-0.75475-0.98445-0.38633 0.12534
   2  -5   6  637.47   36.88   1-0.78220-0.42142-0.36440 0.07318 0.50533 0.90390
   2   5   6  647.88   37.28   1-0.51611-0.92436-0.05896 0.16786 0.85448 0.34259
  -2   5  -7  669.03   38.61   1-0.30350-0.64952 0.92643 0.43880-0.22270-0.62094
  -2  -5  -7  666.56   36.41   1-0.57230-0.14742-0.70626-0.98486-0.41673 0.09111
   2  -5   7  622.72   33.54   1-0.78687-0.44386-0.37874 0.10770 0.48721 0.88959
   2   5   7  680.18   37.38   1-0.48808-0.91435-0.09019 0.18538 0.86812 0.35998
  -2   5  -8  521.70   32.96   1-0.33587-0.66415 0.90919 0.37263-0.24607-0.64810
  -2  -5  -8  620.34   35.53   1-0.60985-0.16723-0.65656-0.98407-0.44384 0.06018
   2  -5   8  543.70   33.72   1-0.79146-0.46623-0.39416 0.14115 0.46714 0.87332
   2   5   8  562.36   32.30   1-0.45982-0.90414-0.12049 0.20385 0.87979 0.37544
  -2   5  -9 1737.54   76.32   1-0.36342-0.67396 0.89285 0.30735-0.26596-0.67178
  -2  -5  -9 1930.75   82.95   1-0.64313-0.18275-0.60620-0.98262-0.46786 0.03233
   2  -5   9 1773.72   75.61   1-0.79581-0.48836-0.41046 0.17371 0.44519 0.85517
   2   5   9 1866.98   82.62   1-0.43137-0.89375-0.14988 0.22323 0.88963 0.38905
  -2   5 -10   71.51   17.22   1-0.38652-0.67933 0.87790 0.24347-0.28263-0.69226
  -2  -5 -10   71.27   14.24   1-0.67245-0.19432-0.55557-0.98091-0.48902 0.00735
   2  -5  10   65.03   13.27   1-0.79978-0.51011-0.42750 0.20553 0.42140 0.83518
   2   5  10   82.40   17.97   1-0.40272-0.88316-0.17846 0.24343 0.89775 0.40096
  -2   5 -11  645.51   47.05   1-0.40558-0.68065 0.86466 0.18130-0.29639-0.70981
  -2  -5 -11  714.64   48.57   1-0.69812-0.20224-0.50497-0.97921-0.50755-0.01500
   2  -5  11  671.85   49.52   1-0.80322-0.53133-0.44514 0.23675 0.39581 0.81340
   2   5  11  666.72   47.17   1-0.37384-0.87234-0.20628 0.26438 0.90425 0.41124
  -2   5 -12  684.71   38.14   1-0.42098-0.67831 0.85335 0.12105-0.30750-0.72472
  -2  -5 -12  708.00   39.32   1-0.72047-0.20684-0.45459-0.97774-0.52369-0.03496
   2  -5  12  647.21   36.97   1-0.80599-0.55188-0.46325 0.26751 0.36845 0.78984
   2   5  12  702.99   37.65   1-0.34473-0.86128-0.23341 0.28602 0.90921 0.41998
  -2   5 -13  151.91   21.15   1-0.43311-0.67289 0.84403 0.06256-0.31626-0.73708
  -2  -5 -13  152.26   24.01   1-0.73978-0.20840-0.40456-0.97662-0.53762-0.05272
   2  -5  13  196.38   24.69   1-0.80795-0.57141-0.48158 0.29806 0.33954 0.76462
   2   5  13  147.45   29.81   1-0.31534-0.84995-0.25990 0.30829 0.91268 0.42723
   2   6 -10   21.35   16.55   1-0.21520-0.41620 0.96354 0.38890-0.15897-0.82190
   2  -6 -10   26.12   20.96   1-0.60100 0.12299-0.66889-0.99233-0.43745-0.01229
  -2  -6  10   21.39   15.18   1-0.79605-0.59943-0.59013-0.01791 0.13434 0.80022
  -2   6  10   21.84   15.25   1-0.14850-0.87361-0.39536-0.07680 0.90644 0.48052
   2   6  -9  385.53   26.13   1-0.18659-0.40534 0.97265 0.44694-0.13832-0.79745
   2  -6  -9  405.54   25.93   1-0.56490 0.14133-0.71528-0.98980-0.41139 0.01758
  -2  -6   9  369.61   23.16   1-0.79809-0.58370-0.58417-0.06081 0.14761 0.80968
  -2   6   9  368.38   22.98   1-0.16323-0.87032-0.38435-0.11460 0.90864 0.47896
   2   6  -8    9.83   21.46   1-0.15386-0.39037 0.98141 0.50464-0.11469-0.77002
   2  -6  -8    2.72   11.70   1-0.52548 0.16300-0.75975-0.98536-0.38294 0.04986
  -2  -6   8   21.64   15.55   1-0.79963-0.56747-0.57920-0.10471 0.15845 0.81670
  -2   6   8   19.90   13.47   1-0.17639-0.86545-0.37437-0.15343 0.91034 0.47691
   2   6  -7    6.08   11.74   1-0.11698-0.37125 0.98922 0.56139-0.08807-0.73960
   2  -6  -7    5.78   12.78   1-0.48278 0.18795-0.80182-0.97853-0.35211 0.08451
  -2  -6   7    5.38   11.72   1-0.80072-0.55079-0.57537-0.14975 0.16665 0.82109
  -2   6   7    8.26   13.11   1-0.18771-0.85875-0.36566-0.19353 0.91161 0.47443
   2   6  -6   20.57   11.92   1-0.07604-0.34806 0.99538 0.61649-0.05852-0.70624
   2  -6  -6   27.84   13.05   1-0.43694 0.21604-0.84100-0.96880-0.31903 0.12142
  -2  -6   6   27.44   19.16   1-0.80140-0.53369-0.57285-0.19609 0.17200 0.82262
  -2   6   6   12.98   13.64   1-0.19686-0.84987-0.35856-0.23524 0.91251 0.47157
  -2   6   5   11.93   16.54   1 0.39149-0.24420 0.87687 0.95557 0.27895-0.16501
   2   6  -5   11.88   13.40   1-0.03127-0.32105 0.99916 0.66921-0.02621-0.67012
  -2  -6   5   15.97   14.70   1-0.80167-0.51619-0.57181-0.24392 0.17419 0.82100
  -2   6   5   19.14   10.28   1-0.20334-0.83833-0.35348-0.27897 0.91307 0.46837
  -2   6   4  157.64   21.63   1 0.34032-0.27764 0.90862 0.93839 0.24202-0.20572
   2   6  -4  134.62   18.59   1 0.01689-0.29062 0.99982 0.71881 0.00856-0.63154
  -2  -6   4  179.47   18.73   1-0.80151-0.49825-0.57244-0.29341 0.17287 0.81587
   2  -6  -4  124.25   14.50   1-0.80065-0.18558-0.43167-0.46196 0.41545 0.86726
  -2   6   4  128.60   16.05   1-0.20648-0.82345-0.35100-0.32530 0.91332 0.46487
  -2   6   3    6.91   14.96   1 0.28715-0.31310 0.93598 0.91680 0.20363-0.24786
   2   6  -3   20.57   13.36   1 0.06793-0.25732 0.99665 0.76459 0.04540-0.59091
  -2  -6   3   23.95   14.88   1-0.80085-0.47981-0.57493-0.34476 0.16760 0.80679
   2  -6  -3   22.27   11.59   1-0.79650-0.19921-0.41326-0.39469 0.44135 0.89695
  -2   6   3   16.68   12.07   1-0.20529-0.80423-0.35194-0.37505 0.91322 0.46102
  -2   6   2   52.65   14.07   1 0.23262-0.34991 0.95858 0.89044 0.16428-0.29098
   2   6  -2   60.68   12.94   1 0.12108-0.22191 0.98910 0.80598 0.08376-0.54875
  -2  -6   2   75.43   15.57   1-0.79955-0.46074-0.57949-0.39819 0.15782 0.79319
   2  -6  -2   56.00   12.67   1-0.79313-0.21362-0.40022-0.33279 0.45907 0.91848
   2   6  -1  405.78   26.05   1 0.17550-0.18523 0.97676 0.84259 0.12304-0.50568
  -2   6   1  427.64   26.69   1 0.17753-0.38735 0.97620 0.85913 0.12451-0.33444
  -2  -6   1  441.56   29.58   1-0.79737-0.44079-0.58633-0.45390 0.14282 0.77438
   2  -6  -1  400.71   25.51   1-0.79074-0.22900-0.39165-0.27536 0.47045 0.93366
   2   6   0   23.51   10.97   1 0.23017-0.14822 0.95948 0.87415 0.16250-0.46247
  -2   6   0   21.46   14.17   1 0.12261-0.42453 0.98881 0.82279 0.08487-0.37786
  -2  -6   0   20.27   15.77   1-0.79395-0.41959-0.59567-0.51209 0.12171 0.74946
   2  -6   0   32.43   12.19   1-0.78934-0.24538-0.38687-0.22172 0.47671 0.94372
   2   6   0   21.08   11.76   1-0.60887-0.98558 0.05478-0.03241 0.79137 0.16606
   2   6   1   86.16   13.56   1 0.28447-0.11164 0.93722 0.90085 0.20170-0.41952
  -2   6  -1   85.41   17.88   1 0.06872-0.46068 0.99657 0.78160 0.04597-0.42055
  -2  -6  -1  101.73   15.87   1-0.78856-0.39559-0.60791-0.57448 0.09274 0.71656
   2  -6   1   75.19   14.71   1-0.78888-0.26270-0.38532-0.17130 0.47873 0.94954
   2   6   1   88.84   12.15   1-0.58747-0.98224 0.02688-0.01153 0.80879 0.18727
   2   6   2   20.62   12.36   1 0.33744-0.07638 0.91025 0.92284 0.23993-0.37753
  -2   6  -2   27.34   19.03   1 0.01664-0.49502 0.99982 0.73590 0.00838-0.46194
  -2  -6  -2   26.22   12.24   1-0.78044-0.36974-0.62278-0.63827 0.05525 0.67520
   2  -6   2   23.61   10.47   1-0.78925-0.28084-0.38655-0.12367 0.47713 0.95174
   2   6   2   34.60   12.06   1-0.56545-0.97828-0.00068 0.00966 0.82477 0.20703
   2   6   3   49.41   13.08   1 0.38838-0.04316 0.87897 0.94051 0.27671-0.33699
  -2   6  -3   52.94   14.01   1-0.03299-0.52691 0.99907 0.68616-0.02745-0.50153
  -2  -6  -3   30.52   13.06   1-0.76800-0.33958-0.64041-0.70481 0.00676 0.62282
   2  -6   3   60.24   11.68   1-0.79031-0.29969-0.39018-0.07844 0.47238 0.95080
   2   6   3   52.10   13.55   1-0.54288-0.97377-0.02791 0.03120 0.83934 0.22538
  -2   6  -4  229.87   19.25   1-0.07949-0.55565 0.99496 0.63311-0.06101-0.53890
  -2  -6  -4  258.92   16.72   1-0.43243 0.01618-0.84456-0.95558-0.31577 0.29427
   2  -6   4  275.59   20.30   1-0.79194-0.31910-0.39590-0.03529 0.46484 0.94706
   2   6   4  285.24   20.56   1-0.51978-0.96873-0.05477 0.05310 0.85253 0.24236
  -2   6  -5   25.53   17.13   1-0.12248-0.58089 0.98819 0.57739-0.09204-0.57373
  -2  -6  -5   23.61   12.45   1-0.47793-0.01156-0.80624-0.96618-0.34862 0.25760
   2  -6   5    5.42   16.72   1-0.79399-0.33893-0.40342 0.00604 0.45476 0.94079
   2   6   5    5.65   13.86   1-0.49625-0.96320-0.08123 0.07540 0.86437 0.25795
  -2   6  -6  131.29   17.35   1-0.16169-0.60234 0.97947 0.51974-0.12035-0.60584
  -2  -6  -6  136.81   16.77   1-0.52022-0.03610-0.76525-0.97408-0.37914 0.22325
   2  -6   6  141.50   16.84   1-0.79632-0.35903-0.41251 0.04580 0.44237 0.93219
   2   6   6  141.98   19.56   1-0.47219-0.95720-0.10738 0.09802 0.87493 0.27229
  -2   6  -7  321.86   26.02   1-0.19699-0.61988 0.96950 0.46082-0.14582-0.63512
  -2  -6  -7  327.39   22.77   1-0.55918-0.05731-0.72210-0.97985-0.40727 0.19131
   2  -6   7  305.43   22.82   1-0.79878-0.37928-0.42297 0.08421 0.42781 0.92144
   2   6   7  306.15   21.16   1-0.44767-0.95074-0.13317 0.12099 0.88422 0.28536
  -2   6  -8    2.73   16.09   1-0.22844-0.63390 0.95885 0.40134-0.16853-0.66112
  -2  -6  -8   -4.08   15.87   1-0.59480-0.07517-0.67730-0.98395-0.43297 0.16177
   2  -6   8    2.16   17.29   1-0.80125-0.39952-0.43461 0.12143 0.41121 0.90864
   2   6   8    0.89   12.88   1-0.42271-0.94384-0.15862 0.14431 0.89227 0.29719
  -2   6  -9   64.56   18.14   1-0.25595-0.64367 0.94815 0.34171-0.18838-0.68477
  -2  -6  -9   68.63   22.60   1-0.62713-0.08974-0.63125-0.98682-0.45631 0.13462
   2  -6   9   60.80   15.29   1-0.80359-0.41964-0.44727 0.15764 0.39266 0.89389
   2   6   9   52.76   16.25   1-0.39731-0.93650-0.18373 0.16797 0.89909 0.30780
  -2   6 -10  367.05   27.83   1-0.27974-0.64973 0.93781 0.28243-0.20556-0.70574
  -2  -6 -10  316.07   21.69   1-0.65627-0.10114-0.58432-0.98879-0.47735 0.10975
   2  -6  10  330.15   21.09   1-0.80566-0.43950-0.46080 0.19297 0.37223 0.87726
   2   6  10  330.81   21.06   1-0.37148-0.92872-0.20852 0.19196 0.90472 0.31720
   2   7  -6   22.03   20.88   1 0.01858-0.33060 0.99978 0.59994 0.00977-0.72854
   2  -7  -6    0.44   16.06   1-0.44923 0.28075-0.83106-0.93800-0.32790 0.20328
  -2  -7   6    3.68   15.88   1-0.79520-0.45095-0.59241-0.19493 0.12916 0.87099
   2   7  -5 1543.52   69.05   1 0.05712-0.30979 0.99765 0.64676 0.03759-0.69693
   2  -7  -5 1413.72   59.01   1-0.40661 0.30562-0.86392-0.92196-0.29713 0.23787
  -2  -7   5 1637.20   68.07   1-0.79529-0.43326-0.59217-0.24355 0.12971 0.86773
  -2   7   4  434.99   27.13   1 0.36577-0.32933 0.89353 0.90236 0.26038-0.27800
   2   7  -4  369.10   25.84   1 0.09802-0.28663 0.99291 0.69097 0.06712-0.66362
  -2  -7   4  417.98   26.96   1-0.79483-0.41502-0.59340-0.29365 0.12691 0.86111
  -2   7   3 1844.08   74.68   1 0.32024-0.35713 0.91960 0.87946 0.22752-0.31462
   2   7  -3 1861.96   78.90   1 0.14086-0.26153 0.98516 0.73216 0.09804-0.62891
  -2  -7   3 1963.40   81.12   1-0.79371-0.39614-0.59625-0.34536 0.12037 0.85076
  -2   7   2  360.71   24.17   1 0.27390-0.38576 0.94197 0.85287 0.19407-0.35183
   2   7  -2  378.66   28.78   1 0.18514-0.23499 0.97407 0.77002 0.13000-0.59316
  -2  -7   2  357.60   27.43   1-0.79179-0.37644-0.60086-0.39883 0.10961 0.83619
  -2   7   1  357.87   31.67   1 0.22724-0.41471 0.96053 0.82248 0.16039-0.38927
   2   7  -1  362.50   30.32   1 0.23019-0.20761 0.95947 0.80423 0.16252-0.55686
  -2  -7   1  345.42   30.51   1-0.78875-0.35454-0.60752-0.45573 0.09368 0.81646
   2  -7  -1  250.54   23.27   1-0.80511-0.16687-0.45690-0.31987 0.37818 0.93264
   2   7   0   89.01   18.82   1 0.27573-0.17979 0.94116 0.83488 0.19539-0.52023
  -2   7   0   76.84   17.57   1 0.18083-0.44344 0.97529 0.78833 0.12689-0.42648
  -2  -7   0   93.94   19.05   1-0.78431-0.33238-0.61613-0.51325 0.07236 0.79126
   2  -7   0   88.06   17.10   1-0.80404-0.18358-0.45000-0.26411 0.38859 0.94685
   2   7   1  892.56   60.19   1 0.32104-0.15219 0.91918 0.86186 0.22810-0.48376
  -2   7  -1  778.20   51.40   1 0.13514-0.47139 0.98636 0.75045 0.09392-0.46325
  -2  -7  -1  786.84   56.51   1-0.77785-0.30820-0.62686-0.57290 0.04444 0.75946
   2  -7   1  767.00   54.34   1-0.80337-0.20069-0.44601-0.21126 0.39454 0.95660
   2   7   2  208.53   20.58   1 0.36560-0.12535 0.89364 0.88527 0.26026-0.44784
  -2   7  -2  169.50   17.53   1 0.09073-0.49807 0.99395 0.70909 0.06185-0.49910
   2  -7   2  176.48   20.75   1-0.80312-0.21822-0.44457-0.16096 0.39666 0.96253
  -2   7  -3 2104.15   80.60   1 0.04806-0.52300 0.99836 0.66455 0.03105-0.53369
   2  -7   3 2282.13   93.61   1-0.80326-0.23614-0.44538-0.11290 0.39546 0.96513
  -2   7  -4  661.06   33.86   1 0.00755-0.54577 0.99997 0.61721 0.00182-0.56672
  -2  -7  -4  598.46   29.57   1-0.44631 0.07931-0.83346-0.92362-0.32579 0.37499
   2  -7   4  606.30   30.13   1-0.80374-0.25440-0.44818-0.06684 0.39131 0.96478
  -2   7  -5  756.79   39.27   1-0.03049-0.56605 0.99920 0.56746-0.02564-0.59797
  -2  -7  -5  683.22   36.70   1-0.48614 0.05723-0.79872-0.93780-0.35454 0.34241
   2  -7   5  734.26   38.55   1-0.80448-0.27291-0.45273-0.02253 0.38450 0.96177
  -2   7  -6   15.58   16.80   1-0.06573-0.58353 0.99652 0.51585-0.05108-0.62720
  -2  -7  -6   19.80   17.25   1-0.52377 0.03735-0.76155-0.94953-0.38170 0.31143
   2  -7   6   -0.88   16.70   1-0.80539-0.29160-0.45883 0.02023 0.37525 0.95632
   3   0 -17  343.59   27.41   1-0.78784-0.35988 0.22751-0.54368-0.57231-0.75821
  -3   0  17  393.04   26.80   1 0.19515-0.23733-0.60440 0.16358 0.77240 0.95755
   3   0 -16    2.58   14.80   1-0.79350-0.38327 0.19524-0.52702-0.57639-0.75851
  -3   0  16   -3.86   16.89   1 0.17851-0.23595-0.59641 0.12277 0.78257 0.96397
   3   0 -15 1741.49   91.05   1-0.79827-0.40576 0.16292-0.51041-0.57984-0.75817
  -3   0  15 1761.97   92.79   1 0.16348-0.23295-0.58899 0.08137 0.79142 0.96907
   3   0 -14    3.81   11.93   1-0.80217-0.42739 0.13047-0.49393-0.58266-0.75720
  -3   0  14   -3.83   11.78   1 0.15028-0.22813-0.58233 0.03923 0.79893 0.97283
   3   0 -13 1337.81   61.68   1-0.80521-0.44816 0.09779-0.47768-0.58485-0.75562
  -3   0  13 1299.23   71.39   1-0.61901-0.97765-0.71178-0.13755-0.33193-0.15897
  -3   0  13 1256.06   59.41   1 0.13919-0.22121-0.57662-0.00386 0.80506 0.97521
   3   0 -12   -9.32   11.91   1-0.80740-0.46807 0.06474-0.46181-0.58643-0.75341
  -3   0  12    0.94    9.47   1-0.63164-0.97245-0.71017-0.18485-0.31091-0.14196
  -3   0  12    6.01   13.39   1 0.13062-0.21171-0.57214-0.04819 0.80968 0.97614
   3   0 -11   55.37   12.63   1-0.80871-0.48711 0.03112-0.44649-0.58737-0.75057
  -3   0  11   67.22   10.59   1-0.64094-0.96393-0.70867-0.23225-0.29489-0.12994
  -3   0  11   63.10   13.17   1 0.12492-0.19939-0.56913-0.09399 0.81269 0.97540
   3   0 -10   -1.78   12.21   1-0.80910-0.50522-0.00331-0.43200-0.58766-0.74707
  -3   0  10   -4.65    8.60   1-0.64683-0.95199-0.70757-0.28005-0.28449-0.12354
  -3   0  10    2.84    9.41   1 0.12280-0.18349-0.56801-0.14167 0.81380 0.97275
   3   0  -9 1359.66   54.72   1-0.80848-0.52233-0.03897-0.41873-0.58721-0.74284
  -3   0   9 1316.84   53.73   1-0.64902-0.93637-0.70713-0.32852-0.28056-0.12361
  -3   0   9 1272.84   54.10   1 0.12511-0.16316-0.56923-0.19171 0.81259 0.96779
   3   0  -8    0.67    7.27   1-0.80671-0.53815-0.07677-0.40746-0.58593-0.73781
  -3   0   8   -0.96    6.59   1-0.64700-0.91652-0.70754-0.37783-0.28419-0.13124
  -3   0   8   -0.45    9.79   1 0.13302-0.13723-0.57340-0.24469 0.80839 0.95983
   3   0  -7 5202.45  179.18   1-0.80352-0.55270-0.11713-0.39889-0.58363-0.73171
  -3   0   7 4721.50  180.99   1-0.63988-0.89158-0.70886-0.42805-0.29674-0.14779
  -3   0   7 5207.52  174.93   1 0.14808-0.10418-0.58120-0.30130 0.80017 0.94782
   3   0  -6    2.10   10.12   1-0.79838-0.56529-0.16209-0.39492-0.57992-0.72420
  -3   0   6   10.81    9.15   1-0.62633-0.86020-0.71091-0.47900-0.31986-0.17491
  -3   0   6    0.10    8.74   1 0.17264-0.06159-0.59354-0.36244 0.78606 0.92996
   3   0  -5   60.95    8.90   1-0.79013-0.57478-0.21506-0.39898-0.57396-0.71444
  -3   0   5   61.82    8.95   1-0.60433-0.82038-0.71308-0.53007-0.35538-0.21443
  -3   0   5   59.78   10.19   1 0.20973-0.00648-0.61122-0.42893 0.76316 0.90331
   3   0  -4    0.97    5.16   1-0.77579-0.57819-0.28365-0.41865-0.56362-0.70030
  -3   0   4    1.98    7.67   1-0.57106-0.76929-0.71402-0.57992-0.40504-0.26809
  -3   0   4    5.56    6.74   1 0.26341 0.06521-0.63476-0.50128 0.72642 0.86282
   3   0  -3 1003.51   40.27   1-0.74544-0.56553-0.38841-0.47435-0.54171-0.67464
  -3   0   3 1000.80   42.63   1-0.52247-0.70291-0.71121-0.62618-0.47032-0.33734
  -3   0   3 1153.06   49.88   1 0.33832 0.15815-0.66322-0.57849 0.66758 0.80020
   3   0  -2   -0.70    7.02   1-0.64884-0.48669-0.59684-0.63388-0.47198-0.60109
  -3   0   2   -5.25    9.44   1-0.45506-0.61765-0.70071-0.66458-0.54945-0.42050
   3   0  -2    8.48    6.50   1-0.43639-0.27401 0.69666 0.66101-0.56939-0.69855
  -3   0   0    6.74   10.18   1-0.60532-0.73176 0.66292 0.60240-0.44057-0.31878
  -3   0   0    0.15    7.69   1-0.25101-0.37777-0.63514-0.69698-0.73046-0.60950
   3   0   0    0.64    8.54   1-0.68416-0.55795 0.69748 0.75940-0.21312-0.33464
  -3   0  -2   -2.31    6.50   1-0.79458-0.88575 0.18838 0.02993-0.57718-0.46318
  -3   0  -2    4.52    9.84   1 0.02633-0.06449-0.48645-0.64620-0.87331-0.76043
   3   0   2   -2.17    7.86   1-0.80905-0.71903 0.51419 0.67365 0.28465 0.17078
  -3   0  -3 2410.45   88.53   1-0.80320-0.87665 0.12037-0.08700-0.58340-0.47319
  -3   0  -3 2515.08   98.16   1 0.16997 0.09699-0.38601-0.59472-0.90670-0.79805
   3   0   3 2576.30   90.66   1-0.78786-0.71591 0.38196 0.59018 0.48308 0.37302
  -3   0  -4   -4.00    6.89   1-0.80592-0.86164 0.08843-0.16787-0.58537-0.47893
  -3   0  -4   -2.32    6.93   1 0.30207 0.24702-0.27874-0.53635-0.91162-0.80703
   3   0   4   -0.48    7.01   1-0.73678-0.68284 0.25730 0.51421 0.62525 0.51894
  -3   0  -5 2006.78   75.87   1-0.80678-0.84477 0.07560-0.22963-0.58598-0.48334
   3   0   5 1806.91   71.22   1-0.67481-0.63895 0.14939 0.45506 0.72270 0.62020
  -3   0  -6    0.62    9.02   1-0.80688-0.82714 0.07404-0.28012-0.58605-0.48719
   3   0   6    1.43    6.14   1-0.50065-0.47990 0.07634 0.43059 0.86227 0.76438
   3   0   6   -0.32    6.85   1-0.61219-0.59429 0.05922 0.41368 0.78848 0.68969
  -3   0  -7 7557.79  229.99   1-0.80652-0.80906 0.07967-0.32341-0.58580-0.49072
   3   0   7 7377.16  242.26   1-0.58069-0.57774-0.01829 0.38481 0.81391 0.71981
   3   0   7 7389.42  234.88   1-0.55232-0.55247-0.01664 0.38657 0.83346 0.73846
  -3   0  -8    4.91   11.78   1-0.80579-0.79061 0.09021-0.36181-0.58527-0.49398
   3   0   8    1.60    5.86   1-0.64534-0.66018-0.10525 0.34670 0.75660 0.66629
   3   0   8    3.31    9.17   1-0.49637-0.51458-0.08109 0.37090 0.86431 0.77306
  -3   0  -9  168.28   17.20   1-0.80468-0.77177 0.10423-0.39671-0.58447-0.49696
   3   0   9  178.96   14.03   1-0.69664-0.72927-0.18457 0.31623 0.69327 0.60675
   3   0   9  181.33   14.89   1-0.44412-0.48039-0.13684 0.36392 0.88545 0.79798
  -3   0 -10    2.23   14.19   1-0.80316-0.75252 0.12086-0.42902-0.58337-0.49964
   3   0  10    3.84    6.22   1-0.73651-0.78694-0.25676 0.29290 0.62579 0.54306
   3   0  10   -5.21   11.27   1-0.39511-0.44943-0.18588 0.36365 0.89963 0.81594
  -3   0 -11  439.87   24.04   1-0.80117-0.73281 0.13948-0.45932-0.58194-0.50199
   3   0  11  445.06   20.32   1-0.76652-0.83466-0.32242 0.27617 0.55540 0.47650
   3   0  11  464.56   21.18   1-0.34876-0.42114-0.22970 0.36860 0.90862 0.82871
  -3   0 -12  -12.20   21.49   1-0.79869-0.71261 0.15970-0.48803-0.58015-0.50399
   3   0  12    1.95    7.17   1-0.78799-0.87391-0.38238 0.26508 0.48254 0.40744
   3   0  12   -0.70   11.93   1-0.30460-0.39478-0.26938 0.37821 0.91359 0.83731
  -3   0 -13  710.27   37.20   1-0.79567-0.69186 0.18121-0.51545-0.57797-0.50559
   3   0  13  724.57   38.46   1-0.26210-0.37031-0.30579 0.39061 0.91530 0.84278
  -3   0 -14   11.14   15.96   1-0.79208-0.67054 0.20381-0.54178-0.57537-0.50678
   3   0  14    4.13   13.74   1-0.22092-0.34715-0.33952 0.40569 0.91428 0.84551
  -3   0 -15   -2.23   15.28   1-0.78787-0.64861 0.22733-0.56719-0.57234-0.50753
   3   0  15    1.02   14.57   1-0.18074-0.32500-0.37103 0.42298 0.91085 0.84584
  -3   0 -16    4.06   14.16   1-0.78301-0.62602 0.25165-0.59180-0.56882-0.50780
   3   0  16    0.33   18.97   1-0.14130-0.30358-0.40068 0.44215 0.90525 0.84399
  -3   0 -17   22.82   21.09   1-0.77744-0.60273 0.27669-0.61569-0.56481-0.50757
   3   0  17   26.20   17.34   1-0.10237-0.28267-0.42872 0.46292 0.89761 0.84011
   3   1 -17  197.03   18.84   1-0.74811-0.39735 0.38049-0.41171-0.54364-0.82012
   3  -1 -17  210.11   22.92   1-0.80632-0.30130 0.08273-0.66755-0.58565-0.68087
  -3  -1  17  212.83   20.75   1 0.28441-0.07125-0.64327 0.14612 0.71085 0.98669
  -3   1  17  214.28   21.64   1 0.12613-0.38314-0.56977 0.17683 0.81206 0.90660
   3   1 -16   71.91   19.64   1-0.75496-0.42192 0.35927-0.38400-0.54858-0.82129
   3  -1 -16   66.46   15.58   1-0.80843-0.32113 0.04078-0.66057-0.58717-0.67860
  -3  -1  16   81.11   14.86   1 0.27158-0.06605-0.63812 0.10246 0.72044 0.99254
  -3   1  16   72.31   16.23   1 0.10687-0.38438-0.55943 0.13836 0.82195 0.91274
   3   1 -15  790.25   48.80   1-0.76096-0.44564 0.33943-0.35492-0.55291-0.82184
   3  -1 -15  811.17   48.69   1-0.80910-0.33953-0.00229-0.65473-0.58766-0.67530
  -3  -1  15  846.00   50.57   1 0.26090-0.05871-0.63371 0.05805 0.72824 0.99658
  -3   1  15  813.35   49.16   1 0.08884-0.38438-0.54949 0.09949 0.83076 0.91779
   3   1 -14  876.20   29.52   1-0.76613-0.46854 0.32121-0.32420-0.55664-0.82180
   3  -1 -14  802.45   32.21   1-0.80821-0.35637-0.04681-0.65031-0.58702-0.67088
  -3  -1  14  836.92   31.24   1-0.69598-0.99558-0.69295-0.04926-0.18820 0.07987
  -3  -1  14  920.00   36.31   1 0.25267-0.04892-0.63025 0.01271 0.73412 0.99872
  -3   1  14  842.27   29.73   1 0.07219-0.38301-0.54009 0.06009 0.83850 0.92178
   3   1 -13  634.42   36.41   1-0.77048-0.49061 0.30495-0.29153-0.55978-0.82116
   3  -1 -13  614.97   34.59   1-0.80556-0.37129-0.09333-0.64775-0.58510-0.66525
  -3  -1  13  560.87   34.84   1-0.70947-0.99030-0.68678-0.09176-0.15805 0.10428
  -3  -1  13  641.14   36.84   1 0.24727-0.03629-0.62794-0.03379 0.73792 0.99877
  -3   1  13  620.94   35.77   1 0.05710-0.38009-0.53137 0.01999 0.84520 0.92473
   3   1 -12  737.95   32.19   1-0.77399-0.51173 0.29105-0.25639-0.56232-0.81998
   3  -1 -12  686.89   29.56   1-0.80089-0.38436-0.14196-0.64745-0.58173-0.65807
  -3  -1  12  730.07   32.61   1-0.71980-0.98291-0.68121-0.13511-0.13349 0.12495
  -3  -1  12  678.91   27.98   1 0.24523-0.02031-0.62707-0.08172 0.73935 0.99644
  -3   1  12  677.07   30.66   1 0.04379-0.37537-0.52355-0.02099 0.85086 0.92663
   3   1 -11  626.48   27.17   1-0.77660-0.53206 0.28027-0.21825-0.56420-0.81808
   3  -1 -11  634.85   27.13   1-0.79378-0.39498-0.19350-0.65007-0.57660-0.64914
  -3  -1  11  564.56   27.13   1-0.72816-0.97356-0.67609-0.17890-0.11255 0.14202
  -3  -1  11  657.76   28.00   1 0.24718-0.00034-0.62791-0.13136 0.73798 0.99133
  -3   1  11  638.50   27.25   1 0.03259-0.36855-0.51686-0.06311 0.85544 0.92746
   3   1 -10   37.59   13.45   1-0.77819-0.55138 0.27347-0.17612-0.56535-0.81545
   3  -1 -10   23.97   10.21   1-0.78361-0.40255-0.24877-0.65642-0.56926-0.63800
  -3   1  10   19.63    7.98   1-0.43132-0.81357-0.69549-0.28874-0.57467-0.50469
  -3  -1  10   26.88   10.16   1-0.73462-0.96230-0.67169-0.22342-0.09560 0.15509
  -3  -1  10   35.09   13.03   1 0.25397 0.02446-0.63080-0.18307 0.73320 0.98279
  -3   1  10   32.02   10.37   1 0.02392-0.35921-0.51161-0.10667 0.85887 0.92714
   3   1  -9 1367.63   67.23   1-0.77852-0.56944 0.27203-0.12863-0.56559-0.81190
   3  -1  -9 1329.82   65.53   1-0.76945-0.40614-0.30887-0.66759-0.55904-0.62399
  -3   1   9 1202.14   71.06   1-0.42270-0.78709-0.69341-0.33556-0.58352-0.51756
  -3  -1   9 1245.23   67.82   1-0.73919-0.94914-0.66833-0.26897-0.08319 0.16362
  -3  -1   9 1371.39   68.06   1 0.26667 0.05519-0.63610-0.23718 0.72405 0.96989
  -3   1   9 1357.14   66.03   1 0.01834-0.34676-0.50821-0.15208 0.86103 0.92553
   3   1  -8 3998.55  144.35   1-0.77713-0.58577 0.27803-0.07370-0.56458-0.80711
   3  -1  -8 3970.75  141.54   1-0.74982-0.40415-0.37532-0.68496-0.54487-0.60620
  -3   1   8 3439.87  208.18   1-0.40508-0.75162-0.68888-0.37993-0.60111-0.53916
  -3  -1   8 4005.56  152.62   1-0.74176-0.93399-0.66633-0.31589-0.07602 0.16691
  -3  -1   8 4100.75  144.23   1 0.28666 0.09319-0.64415-0.29404 0.70914 0.95123
  -3   1   8 3975.78  144.25   1 0.01666-0.33042-0.50718-0.19985 0.86167 0.92242
   3   1  -7 3932.19  128.26   1-0.77302-0.59949 0.29498-0.00791-0.56161-0.80034
   3  -1  -7 3942.09  128.44   1-0.72242-0.39450-0.44986-0.71059-0.52509-0.58260
  -3   1   7 3819.14  131.48   1-0.37707-0.70576-0.68094-0.42089-0.62779-0.56986
  -3  -1   7 3917.09  123.58   1-0.74211-0.91663-0.66605-0.36452-0.07502 0.16403
  -3  -1   7 3985.79  134.60   1 0.31563 0.14019-0.65516-0.35386 0.68638 0.92473
  -3   1   7 3798.52  128.87   1 0.01999-0.30907-0.50922-0.25071 0.86040 0.91739
   3   1  -6 8884.73  294.40   1-0.76416-0.60836 0.32827 0.07430-0.55522-0.79017
   3  -1  -6 8677.88  285.24   1-0.68335-0.37318-0.53491-0.74673-0.49689-0.55057
  -3  -1   6 7763.85  317.25   1-0.73983-0.89662-0.66784-0.41522-0.08142 0.15377
  -3  -1   6 8251.96  284.36   1 0.35535 0.19795-0.66892-0.41635 0.65288 0.88739
  -3   1   6 9039.89  317.77   1 0.02997-0.28107-0.51528-0.30558 0.85649 0.90973
   3   1  -5  199.73   20.06   1-0.74556-0.60747 0.38806 0.18302-0.54179-0.77296
   3  -1  -5  203.22   13.69   1-0.62607-0.33366-0.63285-0.79576-0.45554-0.50540
  -3   1   5  215.78   17.31   1-0.28284-0.57598-0.64815-0.48626-0.70703-0.65710
  -3  -1   5  203.22   15.17   1-0.73418-0.87326-0.67201-0.46830-0.09678 0.13453
  -3   1   5  219.05   17.09   1 0.04902-0.24401-0.52664-0.36575 0.84867 0.89815
   3   1  -4   12.25    6.56   1-0.70384-0.58348 0.49272 0.33660-0.51168-0.73907
   3  -1  -4   11.66    5.11   1-0.53970-0.26503-0.74438-0.85838-0.39320-0.43923
  -3   1   4   13.99    8.24   1-0.21571-0.49093-0.61967-0.50667-0.75463-0.70870
  -3  -1   4    5.72    7.56   1-0.72399-0.84534-0.67872-0.52393-0.12313 0.10429
  -3   1   4   16.20    8.58   1 0.08080-0.19420-0.54498-0.43289 0.83454 0.88027
   3   1  -4   18.33    6.43   1-0.47115-0.34941 0.70383 0.54922-0.53162-0.75911
   3   1  -3  620.34   29.89   1-0.59877-0.49626 0.67194 0.56464-0.43584-0.65947
  -3   1   3  690.18   34.02   1-0.13543-0.39273-0.58059-0.51647-0.80284-0.76092
  -3  -1   3  638.13   30.50   1-0.70725-0.81081-0.68787-0.58212-0.16313 0.06093
  -3   1   3  716.55   33.79   1 0.13096-0.12603-0.57232-0.50905 0.80949 0.85145
   3   1  -3  628.52   28.70   1-0.55151-0.44786 0.71343 0.60761-0.43224-0.65591
  -3   1   1 3329.85  119.01   1-0.03613-0.25750 0.99890 0.96626-0.02971 0.00512
  -3   1   1 3596.83  136.02   1 0.05282-0.16859-0.46912-0.50295-0.88154-0.84771
  -3  -1   1 3148.54  115.69   1-0.64126-0.70917-0.70862-0.70067-0.29434-0.07828
  -3   1   1 2997.00  112.52   1 0.32411 0.10315-0.65823-0.69258 0.67946 0.71392
   3   1  -1 3403.38  118.45   1-0.72030-0.65282 0.68093 0.67268-0.13228-0.34830
  -3   1  -1 4933.35  168.83   1-0.47693-0.66284 0.80715 0.67670-0.34789-0.32047
  -3  -1  -1 4844.02  176.90   1-0.65455-0.68643-0.58727-0.67610-0.47610-0.26773
  -3   1  -1 5385.92  190.88   1 0.24596 0.06039-0.32616-0.45767-0.91275-0.88706
  -3  -1  -1 4820.54  170.71   1-0.49160-0.52380-0.70726-0.79725-0.50804-0.30002
   3   1   1 5263.88  175.87   1-0.80734-0.77605 0.54075 0.63005 0.23617 0.02780
  -3   1  -2 4577.00  160.58   1-0.59758-0.76582 0.67355 0.49423-0.43498-0.41139
  -3  -1  -2 4574.46  166.20   1-0.71214-0.72628-0.47418-0.61193-0.51767-0.31313
  -3   1  -2 5655.90  207.88   1 0.33428 0.16664-0.25018-0.43059-0.90865-0.88702
  -3  -1  -2 4738.37  166.36   1-0.36692-0.38127-0.67785-0.81673-0.63708-0.43309
   3   1   2 4471.60  151.00   1-0.80306-0.78983 0.44424 0.58228 0.39716 0.19260
  -3   1  -3  282.82   16.25   1-0.66832-0.81884 0.56310 0.33485-0.48604-0.46621
  -3  -1  -3  314.78   15.53   1-0.74347-0.73985-0.39412-0.58078-0.54028-0.33956
  -3  -1  -3  316.27   18.48   1-0.20500-0.20121-0.61477-0.80257-0.76159-0.56159
   3   1   3  310.66   15.82   1-0.77562-0.78049 0.34581 0.53265 0.52802 0.32728
   3  -1   3  321.78   15.25   1-0.78965-0.64089 0.38793 0.61754 0.47534 0.45596
  -3   1  -4    9.59    7.12   1-0.70915-0.84193 0.48097 0.20377-0.51551-0.49961
  -3  -1  -4   14.15    6.96   1-0.76316-0.74185-0.33181-0.56732-0.55450-0.35748
  -3  -1  -4   10.39    6.80   1-0.01369 0.00810-0.51161-0.74840-0.85910-0.66318
   3  -1   4   14.44    6.90   1-0.47703-0.34425 0.10218 0.37947 0.87292 0.85877
   3  -1   4   11.01    5.75   1-0.70526-0.57450 0.19921 0.47752 0.68037 0.66476
   3   1   4   10.38    6.96   1-0.73486-0.75776 0.25351 0.48901 0.62905 0.43203
  -3   1  -5 3317.40  121.14   1-0.73320-0.84825 0.42244 0.09631-0.53287-0.52075
  -3  -1  -5 3360.40  118.75   1-0.77679-0.73773-0.27949-0.56392-0.56433-0.37112
  -3  -1  -5 1212.88  533.23   1 0.18675 0.22636-0.37320-0.65912-0.90875-0.71715
   3  -1   5 3097.78  106.81   1-0.53849-0.42351 0.03309 0.35923 0.84197 0.83161
   3  -1   5 3152.98  110.69   1-0.60947-0.49670 0.05558 0.38267 0.79085 0.77900
   3   1   5 3316.55  118.64   1-0.68769-0.72867 0.16986 0.45413 0.70584 0.51263
  -3   1  -6 9916.17  318.73   1-0.74755-0.84489 0.38216 0.00710-0.54323-0.53489
  -3  -1  -610162.82  342.42   1-0.78670-0.72991-0.23342-0.56678-0.57149-0.38207
   3   1   6 9660.81  325.42   1-0.63871-0.69762 0.09577 0.42883 0.76345 0.57395
  -3   1  -7 1861.08   68.02   1-0.75612-0.83573 0.35554-0.06844-0.54942-0.54484
  -3  -1  -7 1877.15   68.66   1-0.79410-0.71957-0.19144-0.57371-0.57683-0.39121
   3  -1   7 1811.74   65.60   1-0.63806-0.55867-0.09484 0.32901 0.76412 0.76133
   3   1   7 1722.02   62.94   1-0.49715-0.57064 0.08022 0.46257 0.86394 0.67852
   3  -1   7 1802.38   65.08   1-0.45196-0.37530-0.12872 0.29591 0.88270 0.87839
   3   1   7 1910.67   69.14   1-0.58976-0.66673 0.02982 0.41164 0.80702 0.62130
  -3   1  -8 2398.18   89.19   1-0.76104-0.82292 0.33917-0.13375-0.55297-0.55217
  -3  -1  -8 2414.03   89.77   1-0.79965-0.70739-0.15222-0.58342-0.58084-0.39902
   3  -1   8 2390.66   88.63   1-0.67752-0.61592-0.15362 0.31909 0.71928 0.72028
   3   1   8 2206.78   99.33   1-0.61451-0.70579-0.06234 0.36885 0.78643 0.60480
   3  -1   8 2381.29   88.85   1-0.38973-0.33113-0.19109 0.28231 0.90088 0.90035
   3   1   8 2426.63   92.04   1-0.54200-0.63702-0.02895 0.40163 0.83987 0.65794
  -3   1  -9  785.62   40.50   1-0.76351-0.80767 0.33058-0.19126-0.55475-0.55773
  -3  -1  -9  834.66   42.59   1-0.80373-0.69372-0.11493-0.59506-0.58378-0.40576
   3  -1   9  768.51   39.62   1-0.71095-0.66715-0.20912 0.31244 0.67142 0.67622
   3   1   9  659.74   42.35   1-0.69911-0.80818-0.18872 0.29133 0.68965 0.51181
   3  -1   9  791.51   40.83   1-0.33493-0.29438-0.24234 0.27983 0.91054 0.91379
   3   1   9  767.32   41.88   1-0.49581-0.60888-0.08171 0.39765 0.86457 0.68638
  -3   1 -10 1139.94   71.93   1-0.76424-0.79068 0.32801-0.24276-0.55528-0.56203
  -3  -1 -10 1049.56   57.76   1-0.80656-0.67882-0.07904-0.60808-0.58583-0.41160
   3  -1  10  989.28   57.74   1-0.73890-0.71290-0.26154 0.30888 0.62098 0.62957
   3  -1  10 1057.35   59.09   1-0.28550-0.26283-0.28595 0.28540 0.91472 0.92166
   3   1  10 1114.23   62.04   1-0.45115-0.58228-0.12956 0.39856 0.88299 0.70858
  -3   1 -11  484.05   28.89   1-0.76363-0.77234 0.33017-0.28953-0.55484-0.56537
  -3  -1 -11  516.21   29.93   1-0.80830-0.66288-0.04430-0.62221-0.58708-0.41646
   3  -1  11  516.57   30.43   1-0.76172-0.75336-0.31089 0.30844 0.56843 0.58078
   3  -1  11  520.88   30.01   1-0.23988-0.23524-0.32417 0.29598 0.91507 0.92576
   3   1  11  544.63   31.09   1-0.40793-0.55711-0.17333 0.40356 0.89640 0.72577
  -3   1 -12  276.14   20.78   1-0.76192-0.75292 0.33612-0.33252-0.55361-0.56792
  -3  -1 -12  287.63   19.09   1-0.80906-0.64591-0.01013-0.63697-0.58763-0.42078
   3  -1  12  265.59   16.26   1-0.77992-0.78934-0.35776 0.31043 0.51353 0.52968
   3  -1  12  277.13   16.09   1-0.19702-0.21041-0.35843 0.31054 0.91252 0.92697
   3   1  12  302.68   20.52   1-0.36596-0.53320-0.21371 0.41195 0.90575 0.73890
  -3   1 -13  870.60   44.92   1-0.75928-0.73255 0.34513-0.37244-0.55170-0.56978
  -3  -1 -13  862.04   42.49   1-0.80888-0.62800 0.02349-0.65227-0.58750-0.42444
   3  -1  13  806.81   45.51   1-0.79365-0.82084-0.40212 0.31493 0.45651 0.47646
   3  -1  13  843.71   43.33   1-0.15615-0.18756-0.38966 0.32812 0.90762 0.92582
   3   1  13  885.02   45.16   1-0.32504-0.51034-0.25125 0.42318 0.91171 0.74864
  -3   1 -14 2078.68   55.83   1-0.75577-0.71131 0.35668-0.40982-0.54916-0.57102
  -3  -1 -14 1996.57   52.27   1-0.80779-0.60919 0.05673-0.66795-0.58672-0.42744
   3  -1  14 2039.35   52.10   1-0.11670-0.16614-0.41853 0.34806 0.90067 0.92263
   3   1  14 1954.27   64.21   1-0.28503-0.48806-0.28635 0.43748 0.91474 0.75524
  -3   1 -15  607.59   32.42   1-0.75144-0.68926 0.37036-0.44507-0.54604-0.57168
  -3  -1 -15  610.15   32.52   1-0.80583-0.58950 0.08970-0.68391-0.58530-0.42981
   3  -1  15  473.58   26.41   1-0.07848-0.14584-0.44533 0.36996 0.89191 0.91752
   3   1  15  629.23   32.93   1-0.24565-0.46671-0.31944 0.45319 0.91520 0.75946
  -3   1 -16  801.60   39.63   1-0.74631-0.66641 0.38584-0.47852-0.54234-0.57175
  -3  -1 -16  781.56   40.24   1-0.80299-0.56894 0.12250-0.70005-0.58325-0.43154
   3   1  16  782.49   39.84   1-0.20678-0.44585-0.35077 0.47068 0.91334 0.76135
  -3   1 -17  390.31   25.35   1-0.74038-0.64276 0.40288-0.51041-0.53806-0.57125
  -3  -1 -17  406.53   25.58   1-0.79927-0.54750 0.15520-0.71628-0.58057-0.43264
   3   1  17  362.91   26.84   1-0.16825-0.42535-0.38056 0.48970 0.90932 0.76109
   3   2 -16  353.83   27.91   1-0.69144-0.43550 0.51880-0.24541-0.50273-0.86608
   3  -2 -16  355.81   26.28   1-0.80556-0.24105-0.09338-0.77368-0.58510-0.58591
  -3  -2  16  323.80   27.42   1 0.38484 0.12410-0.67808 0.08402 0.62616 0.98870
  -3   2  16  366.52   24.95   1 0.05538-0.51270-0.53037 0.14603 0.84595 0.84605
   3   2 -15  862.21   39.80   1-0.69560-0.45738 0.51026-0.20502-0.50573-0.86530
   3  -2 -15  840.28   37.16   1-0.80069-0.25392-0.14369-0.77507-0.58159-0.57859
  -3  -2  15  676.61   40.03   1-0.72821-0.96781-0.67606 0.03732-0.11242 0.24886
  -3  -2  15  774.70   37.14   1 0.37952 0.13679-0.67650 0.03679 0.63111 0.98991
  -3   2  15  792.80   35.44   1 0.03561-0.51445-0.51867 0.10892 0.85422 0.85057
   3   2 -14  728.40   38.27   1-0.69827-0.47778 0.50465-0.16170-0.50766-0.86346
   3  -2 -14  772.17   39.46   1-0.79340-0.26437-0.19582-0.77828-0.57633-0.56954
  -3  -2  14  726.01   47.80   1-0.73952-0.96140-0.66808-0.00360-0.08228 0.27512
  -3  -2  14  789.13   43.67   1 0.37730 0.15259-0.67583-0.01134 0.63315 0.98822
  -3   2  14  814.98   42.12   1 0.01695-0.51508-0.50736 0.07143 0.86156 0.85415
   3   2 -13  106.91   17.75   1-0.69927-0.49650 0.50256-0.11486-0.50838-0.86040
   3  -2 -13  117.31   14.18   1-0.78333-0.27204-0.25010-0.78364-0.56906-0.55847
  -3  -2  13  129.58   17.60   1-0.74911-0.95327-0.66017-0.04461-0.05474 0.29879
  -3  -2  13  121.06   15.49   1 0.37866 0.17197-0.67624-0.06056 0.63190 0.98323
  -3   2  13  125.92   20.25   1-0.00047-0.51449-0.49655 0.03342 0.86800 0.85684
   3   2 -12 1338.57   67.67   1-0.69825-0.51320 0.50471-0.06377-0.50764-0.85589
   3  -2 -12 1439.32   72.10   1-0.76996-0.27641-0.30693-0.79154-0.55941-0.54502
  -3  -2  12 1480.02   74.69   1-0.75715-0.94360-0.65254-0.08589-0.02990 0.31974
  -3  -2  12 1483.86   76.70   1 0.38417 0.19549-0.67789-0.11102 0.62679 0.97439
  -3   2  12 1487.94   75.39   1-0.01651-0.51251-0.48640-0.00522 0.87357 0.85865
   3   2 -11  305.66   20.05   1-0.69473-0.52741 0.51206-0.00749-0.50510-0.84957
   3  -2 -11  296.19   16.29   1-0.75259-0.27665-0.36678-0.80229-0.54687-0.52894
  -3  -2  11  276.68   18.80   1-0.76379-0.93251-0.64541-0.12767-0.00797 0.33780
  -3  -2  11  283.32   19.38   1 0.39450 0.22385-0.68088-0.16282 0.61706 0.96092
  -3   2  11  276.71   18.64   1-0.03096-0.50894-0.47709-0.04472 0.87830 0.85963
   3   2 -10  115.39   14.12   1-0.68795-0.53835 0.52583 0.05520-0.50021-0.84090
   3  -2 -10  100.10   11.73   1-0.73031-0.27213-0.42999-0.81658-0.53079-0.50904
  -3  -2  10  128.57   16.84   1-0.76912-0.92012-0.63901-0.17018 0.01080 0.35271
  -3   2  10  132.02   15.74   1-0.04353-0.50350-0.46885-0.08530 0.88220 0.85977
   3   2  -9 2714.22  140.53   1-0.67671-0.54505 0.54762 0.12572-0.49210-0.82892
   3  -2  -9 2658.03  135.17   1-0.70186-0.26142-0.49702-0.83471-0.51025-0.48467
  -3  -2   9 2596.00  136.79   1-0.77322-0.90650-0.63360-0.21369 0.02609 0.36412
  -3   2   9 2434.68  127.70   1-0.05386-0.49580-0.46200-0.12725 0.88524 0.85905
   3   2  -9 2745.90  143.29   1-0.42721-0.29186 0.69450 0.27458-0.57891-0.91619
   3   2  -8 3826.13  166.30   1-0.65916-0.54521 0.57935 0.20638-0.47943-0.81249
   3  -2  -8 3739.32  161.83   1-0.66551-0.24283-0.56816-0.85694-0.48401-0.45462
  -3   2   8 2541.43  310.66   1 0.05280-0.37102-0.46914-0.18152-0.88154-0.91070
  -3  -2   8 3814.26  165.67   1-0.77612-0.89168-0.62946-0.25847 0.03744 0.37159
  -3   2   8 3526.74  157.18   1-0.06141-0.48534-0.45693-0.17100 0.88737 0.85743
   3   2  -8 3918.52  172.56   1-0.45711-0.33985 0.70113 0.33000-0.54722-0.88068
   3   2  -7 1678.92   64.74   1-0.63228-0.53605 0.62336 0.29934-0.46002-0.78932
   3  -2  -7 1608.16   61.24   1-0.61901-0.21409-0.64335-0.88322-0.45045-0.41723
  -3   2   7 1031.96  133.13   1 0.08348-0.32238-0.44840-0.20966-0.88992-0.92309
  -3  -2   7 1537.94   62.79   1-0.77781-0.87566-0.62693-0.30485 0.04427 0.37454
  -3   2   7 1603.03   63.82   1-0.06547-0.47138-0.45420-0.21707 0.88849 0.85479
   3   2  -7 1639.16   63.58   1-0.49519-0.39601 0.70779 0.38545-0.50379-0.83342
   3   2  -6 2835.96  102.54   1-0.59128-0.51278 0.68198 0.40689-0.43043-0.75597
   3  -2  -6 2840.79   93.19   1-0.55945-0.17228-0.72178-0.91274-0.40746-0.37041
  -3   2   6 2495.34  168.01   1 0.12218-0.26572-0.42121-0.23135-0.89869-0.93587
  -3  -2   6 2688.24   96.12   1-0.77819-0.85831-0.62635-0.35318 0.04583 0.37222
  -3   2   6 2673.80   95.52   1-0.06497-0.45286-0.45453-0.26622 0.88835 0.85090
   3   2  -6 2748.49   91.78   1-0.54164-0.46055 0.71285 0.43929-0.44549-0.77130
   3   2  -5  439.07   23.88   1-0.52854-0.46784 0.75650 0.53037-0.38515-0.70698
   3  -2  -5  394.14   21.16   1-0.48338-0.11396-0.80127-0.94332-0.35255-0.31167
  -3   2   5  329.94   30.63   1 0.16621-0.20366-0.38884-0.24759-0.90618-0.94721
  -3  -2   5  418.00   23.68   1-0.77704-0.83944-0.62810-0.40385 0.04112 0.36364
  -3   2   5  440.76   24.10   1-0.05834-0.42821-0.45900-0.31949 0.88651 0.84531
   3   2  -5  406.70   21.75   1-0.59548-0.53248 0.71358 0.48881-0.36904-0.69103
  -3   2   4 2810.33  102.89   1 0.38915 0.03750 0.87845 0.97183 0.27726 0.23266
   3   2  -4 2958.05  105.56   1-0.43426-0.39129 0.84312 0.66593-0.31709-0.63515
  -3   2   4 3022.21  122.81   1 0.21574-0.13620-0.35054-0.25818-0.91135-0.95644
  -3  -2   4 2856.33  107.22   1-0.77394-0.81862-0.63259-0.45725 0.02887 0.34751
  -3   2   4 3000.70  112.50   1-0.04315-0.39499-0.46911-0.37841 0.88208 0.83712
   3   2  -4 3041.59  106.50   1-0.65378-0.60887 0.70612 0.53013-0.27194-0.59010
  -3   2   3 1843.93   71.25   1 0.27109-0.06283 0.94319 0.98762 0.19205 0.14368
   3   2  -3 1739.67   66.60   1-0.29782-0.27254 0.92925 0.80110-0.21860-0.53287
  -3   2   3 1978.34   80.98   1 0.26767-0.06633-0.30815-0.26468-0.91290-0.96205
  -3  -2   3 1745.97   66.11   1-0.76817-0.79514-0.64019-0.51376 0.00739 0.32216
  -3   2   3 1782.06   70.96   1-0.01544-0.34926-0.48708-0.44519 0.87321 0.82450
   3   2  -3 1835.89   68.30   1-0.71112-0.68430 0.68594 0.55874-0.15420-0.46854
  -3   2   2  196.06   15.27   1 0.13294-0.18330 0.98681 0.98223 0.09232 0.04027
   3   2  -2  180.34   13.89   1-0.11895-0.11126 0.98885 0.90972-0.08949-0.40002
  -3   2   2  212.42   16.28   1 0.32028 0.00419-0.26272-0.26814-0.91016-0.96336
  -3  -2   2  162.75   13.32   1-0.75853-0.76778-0.65112-0.57361-0.02545 0.28542
  -3   2   2  180.20   13.53   1 0.03145-0.28435-0.51617-0.52310 0.85590 0.80343
   3   2  -2  182.09   13.16   1-0.76018-0.75144 0.64940 0.57098-0.02009-0.33061
  -3  -2   1 8332.56  285.30   1-0.74302-0.73454-0.66533-0.63673-0.07246 0.23453
  -3   2   0 8593.37  292.70   1-0.16571-0.44647 0.97844 0.87591-0.12325-0.18284
  -3   2  -1    8.33    9.38   1-0.29902-0.56207 0.92866 0.77728-0.21947-0.28265
  -3  -2  -1    7.78    6.38   1-0.68006-0.63547-0.69889-0.76820-0.22149 0.07769
   3  -2   1    5.08    7.29   1-0.46763-0.20503 0.11223 0.26370 0.87676 0.94255
   3   2   1    5.40    7.62   1-0.80436-0.84986 0.45196 0.51984 0.38565 0.08659
   3  -2   1    6.04    5.41   1-0.46430-0.20253 0.70255 0.85600-0.53929-0.47563
  -3   2  -2 1767.99   68.38   1-0.40891-0.65422 0.86226 0.66196-0.29879-0.36577
  -3  -2  -2 1536.90   60.02   1-0.51313-0.45025-0.77253-0.88941-0.37402-0.07874
  -3  -2  -2 1632.12   64.25   1-0.61895-0.55654-0.71179-0.82999-0.33203-0.03685
   3  -2   2 1637.18   62.11   1-0.51094-0.26614 0.06481 0.26515 0.85716 0.92674
   3   2   2 1722.81   64.76   1-0.78515-0.84873 0.37332 0.48998 0.49413 0.19889
   3  -2   2 1699.73   65.23   1-0.74773-0.50405 0.66138 0.86363-0.05882 0.00865
  -3   2  -3  491.61   26.69   1-0.49374-0.72139 0.79157 0.54226-0.36002-0.43074
  -3  -2  -3  444.98   23.45   1-0.59013-0.50951-0.68350-0.84929-0.42960-0.13815
  -3  -2  -3  441.45   24.38   1-0.52371-0.44337-0.71133-0.87854-0.46875-0.17766
   3  -2   3  462.28   23.28   1-0.55132-0.32431 0.01785 0.26704 0.83410 0.90747
   3  -2   3  392.06   21.51   1-0.71674-0.49106 0.21944 0.47039 0.66190 0.73319
   3   2   3  464.14   23.63   1-0.75555-0.83720 0.29675 0.46209 0.58402 0.29249
  -3   2  -4  139.90   12.93   1-0.55652-0.76644 0.72523 0.42699-0.40534-0.47983
  -3  -2  -4  128.45   12.02   1-0.64552-0.54715-0.60230-0.81701-0.46959-0.18196
  -3  -2  -4   91.29   10.28   1-0.38012-0.28193-0.68185-0.89796-0.62497-0.33790
   3  -2   4  132.87   11.75   1-0.58865-0.37943-0.02839 0.26964 0.80788 0.88505
   3  -2   4  107.88   10.57   1-0.40879-0.20116-0.17248 0.12725 0.89617 0.97125
   3   2   4  143.76   12.76   1-0.71950-0.81923 0.22444 0.43854 0.65722 0.36950
  -3   2  -5 1670.37   64.29   1-0.60182-0.79407 0.66777 0.32066-0.43804-0.51635
  -3  -2  -5 1623.98   62.27   1-0.68620-0.57007-0.52930-0.79291-0.49895-0.21515
  -3  -2  -5 1266.00  135.13   1-0.17628-0.05986-0.60114-0.86602-0.77945-0.49640
   3  -2   5 1710.55   63.61   1-0.62291-0.43149-0.07373 0.27316 0.77881 0.85976
   3  -2   5 1530.51   56.82   1-0.28359-0.09400-0.28759 0.06109 0.91480 0.99369
   3   2   5 1669.54   62.75   1-0.67999-0.79780 0.15752 0.42038 0.71609 0.43218
  -3   2  -6  710.16   32.19   1-0.63435-0.80887 0.62015 0.22411-0.46152-0.54359
  -3  -2  -6  749.80   30.91   1-0.71676-0.58288-0.46345-0.77598-0.52101-0.24103
  -3  -2  -6  614.30   44.57   1 0.08936 0.22379-0.44435-0.75819-0.89138-0.61241
   3  -2   6  741.72   31.23   1-0.65412-0.48050-0.11805 0.27770 0.74711 0.83186
   3  -2   6  728.37   32.69   1-0.22202-0.05046-0.33864 0.05885 0.91434 0.99699
   3   2   6  713.83   31.26   1-0.63914-0.77486 0.09638 0.40803 0.76302 0.48280
  -3   2  -7  640.38   31.43   1-0.65744-0.81425 0.58231 0.13733-0.47819-0.56402
  -3  -2  -7  666.56   31.62   1-0.74017-0.58853-0.40349-0.76492-0.53790-0.26175
   3  -2   7  663.49   29.33   1-0.68234-0.52652-0.16126 0.28335 0.71301 0.80155
   3  -2   7  620.69   29.91   1-0.17839-0.02486-0.37283 0.07347 0.91058 0.99698
   3   2   7  658.65   29.97   1-0.59770-0.75148 0.04008 0.40050 0.80071 0.52427
  -3   2  -8 1379.86   65.76   1-0.67370-0.81279 0.55325 0.05934-0.48992-0.57952
  -3  -2  -8 1392.62   66.30   1-0.75835-0.58896-0.34823-0.75858-0.55102-0.27870
   3  -2   8 1421.24   67.73   1-0.70765-0.56962-0.20333 0.29013 0.67667 0.76899
   3  -2   8 1418.97   69.22   1-0.14171-0.00620-0.40037 0.09474 0.90532 0.99548
   3   2   8 1496.92   70.41   1-0.55648-0.72831-0.01163 0.39755 0.83077 0.55812
  -3   2  -9  269.71   23.56   1-0.68487-0.80614 0.53192-0.01086-0.49799-0.59161
  -3  -2  -9  259.83   21.29   1-0.77257-0.58555-0.29676-0.75600-0.56129-0.29254
   3  -2   9  259.01   18.92   1-0.73009-0.60986-0.24425 0.29807 0.63820 0.73431
   3  -2   9  241.32   19.15   1-0.10821 0.00926-0.42458 0.11934 0.89889 0.99280
   3   2   9  261.63   19.62   1-0.51576-0.70566-0.05936 0.39859 0.85466 0.58579
  -3   2 -10   10.15   17.37   1-0.69235-0.79590 0.51694-0.07476-0.50339-0.60079
  -3  -2 -10   15.64    9.80   1-0.78372-0.57896-0.24823-0.75640-0.56934-0.30438
   3  -2  10    5.46    9.45   1-0.74973-0.64729-0.28400 0.30717 0.59769 0.69760
   3  -2  10   10.38    8.40   1-0.07676 0.02280-0.44651 0.14612 0.89147 0.98900
   3   2  10    0.00   13.98   1-0.47573-0.68366-0.10358 0.40314 0.87347 0.60834
  -3   2 -11  136.66   15.87   1-0.69695-0.78277 0.50744-0.13320-0.50670-0.60788
  -3  -2 -11  138.38   14.39   1-0.79237-0.56987-0.20210-0.75919-0.57558-0.31443
   3  -2  11  156.22   12.80   1-0.76649-0.68162-0.32233 0.31773 0.55551 0.65911
   3  -2  11  135.61   12.49   1-0.04558 0.03595-0.46750 0.17395 0.88281 0.98409
   3   2  11  144.49   13.78   1-0.43629-0.66228-0.14488 0.41061 0.88806 0.62671
  -3   2 -12  432.99   28.59   1-0.69926-0.76736 0.50256-0.18701-0.50838-0.61333
  -3  -2 -12  420.16   28.84   1-0.79893-0.55869-0.15789-0.76390-0.58032-0.32296
   3  -2  12  412.17   26.48   1-0.78062-0.71353-0.35976 0.32916 0.51107 0.61847
   3  -2  12  342.86   25.69   1-0.01474 0.04877-0.48752 0.20273 0.87298 0.97801
   3   2  12  409.56   25.89   1-0.39745-0.64150-0.18360 0.42066 0.89906 0.64149
  -3   2 -13   85.34   19.28   1-0.69972-0.75009 0.50159-0.23691-0.50871-0.61743
  -3  -2 -13   93.03   16.04   1-0.80370-0.54572-0.11522-0.77015-0.58376-0.33020
   3  -2  13   85.96   13.90   1-0.79198-0.74268-0.39603 0.34176 0.46466 0.57586
   3   2  13  103.51   13.87   1-0.35913-0.62123-0.22010 0.43293 0.90696 0.65316
  -3   2 -14   17.65   14.71   1-0.69860-0.73125 0.50396-0.28347-0.50790-0.62040
  -3  -2 -14   15.99   15.90   1-0.80689-0.53118-0.07379-0.77765-0.58606-0.33630
   3  -2  14   17.81   11.72   1-0.80054-0.76902-0.43113 0.35552 0.41622 0.53123
   3   2  14   20.62   14.89   1-0.32123-0.60140-0.25466 0.44714 0.91211 0.66210
  -3   2 -15   10.12   14.84   1-0.69611-0.71104 0.50918-0.32718-0.50610-0.62238
  -3  -2 -15   -5.65   17.17   1-0.80865-0.51525-0.03348-0.78620-0.58733-0.34115
   3   2  15   15.25   14.86   1-0.28372-0.58157-0.28747 0.46378 0.91479 0.66833
  -3   2 -16   61.27   20.80   1-0.69239-0.68959 0.51687-0.36842-0.50341-0.62347
  -3  -2 -16   73.43   16.57   1-0.80909-0.49797 0.00614-0.79550-0.58765-0.34525
   3   2  16   65.89   17.87   1-0.24639-0.56226-0.31884 0.48123 0.91522 0.67251
   3   3 -15  206.24   20.72   1-0.60694-0.44612 0.66067-0.07582-0.44173-0.89175
   3  -3 -15  205.14   20.57   1-0.78222-0.15843-0.25535-0.86585-0.56826-0.47453
  -3  -3  15  198.34   25.34   1-0.75015-0.91308-0.65924 0.07469-0.05162 0.40087
  -3   3  15  204.56   20.73   1 0.00167-0.62522-0.49789 0.10831 0.86723 0.77289
   3   3 -14  202.78   18.16   1-0.60500-0.46191 0.66337-0.02419-0.44034-0.88659
   3  -3 -14  204.03   21.12   1-0.76899-0.16294-0.31063-0.87221-0.55870-0.46118
  -3  -3  14  199.72   20.93   1-0.75919-0.90440-0.65044 0.03457-0.02333 0.42527
  -3   3  14  235.26   18.40   1-0.01784-0.62671-0.48555 0.07185 0.87402 0.77592
   3   3 -13 1364.19   64.85   1-0.60033-0.47495 0.66981 0.03119-0.43696-0.87945
   3  -3 -13 1232.77   55.84   1-0.75233-0.16388-0.36759-0.88006-0.54668-0.44568
  -3  -3  13 1274.80   58.26   1-0.76684-0.89433-0.64183-0.00572 0.00262 0.44736
  -3   3  13 1254.28   57.04   1-0.03627-0.62713-0.47362 0.03496 0.87997 0.77812
   3   3 -12  697.85   39.92   1-0.59236-0.48471 0.68055 0.09086-0.43121-0.86994
   3  -3 -12  688.76   37.40   1-0.73176-0.16106-0.42622-0.88978-0.53183-0.42700
  -3  -3  12  658.77   37.14   1-0.77324-0.88301-0.63356-0.04637 0.02618 0.46704
  -3   3  12  637.35   38.15   1-0.05351-0.62635-0.46223-0.00244 0.88514 0.77953
   3   3 -12  640.20   42.00   1-0.52982-0.41703 0.71191 0.12426-0.46093-0.90035
   3   3 -11  769.43   43.46   1-0.58036-0.49042 0.69614 0.15540-0.42255-0.85751
   3  -3 -11  722.18   39.35   1-0.70661-0.15366-0.48664-0.90129-0.51368-0.40502
  -3  -3  11  716.61   38.60   1-0.77852-0.87057-0.62583-0.08755 0.04719 0.48418
  -3   3  11  744.98   40.20   1-0.06941-0.62423-0.45153-0.04055 0.88955 0.78018
   3   3 -11  749.81   38.21   1-0.54611-0.45141 0.71314 0.17427-0.43952-0.87513
   3   3 -10    3.87   13.93   1-0.56317-0.49101 0.71736 0.22555-0.41014-0.84144
   3  -3 -10   11.44   13.51   1-0.67609-0.14090-0.54879-0.91453-0.49165-0.37917
  -3  -3  10    2.43   12.01   1-0.78278-0.85711-0.61883-0.12946 0.06547 0.49858
  -3   3  10    6.61   13.93   1-0.08375-0.62054-0.44171-0.07954 0.89323 0.78012
   3   3 -10    6.83    9.68   1-0.56740-0.49078 0.71397 0.22388-0.41024-0.84202
   3   3  -9 1599.70   77.80   1-0.53970-0.48527 0.74438 0.30151-0.39320-0.82072
   3  -3  -9 1546.21   72.70   1-0.63925-0.12181-0.61243-0.92926-0.46506-0.34875
  -3  -3   9 1530.73   71.87   1-0.78611-0.84272-0.61277-0.17232 0.08078 0.51001
  -3   3   9 1674.60   79.46   1-0.09648-0.61521-0.43285-0.11958 0.89628 0.77923
   3   3  -9 1547.75   72.94   1-0.59379-0.53526 0.71366 0.27236-0.37160-0.79956
   3   3  -8  102.40   16.47   1-0.50804-0.47135 0.77764 0.38371-0.37035-0.79409
   3  -3  -8  102.11   13.37   1-0.59500-0.09531-0.67703-0.94496-0.43311-0.31299
  -3  -3   8  107.03   15.33   1-0.78858-0.82747-0.60789-0.21635 0.09280 0.51815
  -3   3   8  103.38   12.90   1-0.10681-0.60752-0.42557-0.16112 0.89859 0.77779
   3   3  -8  101.77   12.31   1-0.62502-0.58458 0.71107 0.31856-0.32203-0.74617
   3   3  -7 5530.39  244.96   1-0.46595-0.44699 0.81688 0.47189-0.33997-0.75994
   3  -3  -7 5489.52  239.39   1-0.54214-0.06020-0.74167-0.96069-0.39496-0.27101
  -3  -3   7 5476.56  236.53   1-0.79020-0.81138-0.60443-0.26181 0.10113 0.52260
   3  -3  -7 4753.45  223.32   1-0.49874-0.01734 0.07846-0.14015 0.86318 0.98997
  -3   3   7 4987.45  230.41   1-0.11443-0.59711-0.42015-0.20451 0.90020 0.77564
   3   3  -7 5620.74  250.75   1-0.66022-0.63787 0.70461 0.36089-0.26003-0.68035
   3   3  -6 1026.07   50.86   1-0.41069-0.40938 0.86097 0.56507-0.30008-0.71630
   3  -3  -6 1006.75   49.01   1-0.47950-0.01532-0.80482-0.97493-0.34975-0.22197
  -3  -3   6 1000.13   51.83   1-0.79084-0.79521-0.60302-0.30883 0.10450 0.52177
   3  -3  -6  834.00   42.76   1-0.49451-0.03090 0.08314-0.08662 0.86518 0.99576
  -3   3   6 1145.62   55.74   1-0.11861-0.58327-0.41716-0.25032 0.90105 0.77274
   3   3  -6 1100.83   54.28   1-0.69760-0.69334 0.69226 0.39733-0.18467-0.60116
   3   3  -5 4740.61  171.32   1-0.33996-0.35638 0.90687 0.65990-0.24902-0.66144
  -3  -3   5 4619.97  161.74   1-0.79073-0.77732-0.60328-0.35796 0.10387 0.51733
   3  -3  -5 4618.27  162.43   1-0.49838-0.05256 0.07887-0.04203 0.86336 0.99773
  -3   3   5 4796.38  164.92   1-0.11829-0.56492-0.41739-0.29937 0.90099 0.76892
   3   3  -5 4935.00  170.38   1-0.73441-0.74823 0.67184 0.42570-0.09617-0.50884
  -3   3   4    3.15    8.22   1 0.32417-0.10459 0.91751 0.98995 0.23036 0.09511
   3   3  -4   -3.31    7.19   1-0.25196-0.28612 0.94979 0.75176-0.18550-0.59412
  -3  -3   4   -0.59    8.77   1-0.78962-0.75764-0.60568-0.40979 0.09813 0.50797
   3  -3  -4    0.20    5.21   1-0.50806-0.08005 0.06805-0.00399 0.85862 0.99678
  -3   3   4   -0.59    8.95   1-0.11184-0.54044-0.42200-0.35279 0.89966 0.76384
   3   3  -4    0.44    6.73   1-0.76708-0.79898 0.64153 0.44417 0.00347-0.40536
  -3   3   3 2396.41   80.81   1 0.22968-0.18137 0.95966 0.98314 0.16215 0.02314
   3   3  -3 2620.79   89.34   1-0.14702-0.19872 0.98302 0.83400-0.10975-0.51472
  -3  -3   3 2444.65   81.17   1-0.78698-0.73728-0.61109-0.46411 0.08496 0.49092
   3  -3  -3 2556.94   87.60   1-0.52196-0.11174 0.05228 0.02908 0.85136 0.99331
  -3   3   3 2621.40   92.58   1-0.09669-0.50727-0.43270-0.41229 0.89633 0.75675
   3   3  -3 2554.71   85.41   1-0.79190-0.84189 0.60061 0.45200 0.11021-0.29480
  -3   3   2    3.78   10.59   1 0.12729-0.26608 0.98793 0.96240 0.08825-0.05443
   3   3  -2   -0.52    6.69   1-0.02969-0.09914 0.99924 0.89916-0.02506-0.42623
  -3  -3   2   -7.49    9.44   1-0.78236-0.71494-0.61955-0.52149 0.06363 0.46571
   3  -3  -2   -2.88    6.44   1-0.53886-0.14644 0.03265 0.05831 0.84175 0.98749
  -3   3   2   -0.43    6.89   1-0.06815-0.46079-0.45238-0.48070 0.88921 0.74605
   3   3  -2    3.06    7.79   1-0.80614-0.87421 0.54979 0.44997 0.21878-0.18241
   3   3   0   22.93    8.93   1 0.21125 0.10640 0.96603 0.96373 0.14885-0.24474
  -3   3   0   31.15   11.95   1-0.08421-0.44212 0.99436 0.87089-0.06442-0.21464
  -3  -3   0   22.70    7.05   1-0.76284-0.65997-0.64648-0.64625-0.01121 0.38311
   3  -3   0   22.17    7.57   1-0.57805-0.22122-0.01496 0.10841 0.81585 0.96917
  -3   3   0   26.62    7.74   1 0.06663-0.28996-0.53690-0.66283 0.84100 0.69034
   3   3   0   18.08    7.99   1-0.80000-0.90422 0.42853 0.42623 0.41994 0.02638
   3   3   1 9473.88  289.08   1 0.31918 0.19662 0.92016 0.96682 0.22676-0.16307
  -3   3  -1 9679.82  303.25   1-0.18329-0.52344 0.97361 0.80120-0.13593-0.28996
  -3  -3  -1 9560.03  331.81   1-0.74387-0.62329-0.66463-0.71331-0.07001 0.32043
   3  -3   1 9646.90  306.14   1-0.59900-0.25996-0.04178 0.13045 0.79965 0.95676
   3   3   1 9261.93  289.20   1-0.78210-0.90441 0.36409 0.41058 0.50571 0.11597
  -3   3  -2   67.34   14.57   1-0.27229-0.59478 0.94116 0.71990-0.20018-0.35772
  -3  -3  -2   66.34   10.00   1-0.71386-0.57556-0.68451-0.78210-0.14776 0.23881
   3  -3   2   71.82   11.03   1-0.62017-0.29892-0.06999 0.15109 0.78133 0.94223
   3   3   2   67.17    9.68   1-0.75725-0.89766 0.30059 0.39576 0.57983 0.19379
  -3   3  -3 3742.23  117.77   1-0.34910-0.65385 0.90154 0.63135-0.25562-0.41696
  -3  -3  -3 3711.98  118.78   1-0.48543-0.32780-0.79938-0.94432-0.35402 0.02814
  -3  -3  -3 3747.24  140.02   1-0.66722-0.51013-0.70279-0.84934-0.24677 0.13552
   3  -3   3 3720.83  118.27   1-0.64117-0.33772-0.09927 0.17067 0.76094 0.92564
   3   3   3 3642.59  121.23   1-0.72755-0.88604 0.23942 0.38335 0.64291 0.26068
  -3   3  -4    9.80   11.40   1-0.41317-0.70018 0.85916 0.54004-0.30186-0.46700
  -3  -3  -4   -6.01    7.78   1-0.54963-0.37424-0.73321-0.92706-0.40037-0.02201
  -3  -3  -4    7.03    7.11   1-0.59120-0.41629-0.71376-0.90922-0.37552 0.00278
   3  -3   4    8.70    9.40   1-0.66169-0.37604-0.12931 0.18948 0.73853 0.90701
   3   3   4    7.74    9.07   1-0.69474-0.87130 0.18141 0.37411 0.69600 0.31758
  -3   3  -5 6104.28  215.51   1-0.46527-0.73465 0.81748 0.44931-0.33947-0.50832
  -3  -3  -5 6496.04  224.14   1-0.60190-0.40877-0.66766-0.91042-0.43810-0.06357
  -3  -3  -5 5643.04  208.10   1-0.46847-0.27560-0.70333-0.94777-0.53464-0.16049
   3  -3   5 6033.36  210.61   1-0.68148-0.41363-0.15989 0.20776 0.71414 0.88642
   3   3   5 6002.75  208.00   1-0.66006-0.85470 0.12686 0.36832 0.74042 0.36580
  -3   3  -6   77.11   15.86   1-0.50681-0.75846 0.77886 0.36176-0.36946-0.54209
  -3  -3  -6   83.08   12.16   1-0.64442-0.43353-0.60411-0.89578-0.46879-0.09808
  -3  -3  -6   35.39    9.36   1-0.27041-0.05929-0.64318-0.93625-0.71637-0.34627
   3  -3   6   73.66   12.57   1-0.70035-0.45029-0.19081 0.22570 0.68782 0.86388
   3   3   6   75.39   10.97   1-0.62457-0.83711 0.07602 0.36627 0.77725 0.40631
  -3   3  -7 6211.06  314.32   1-0.53946-0.77338 0.74464 0.27860-0.39303-0.56943
  -3  -3  -7 6477.77  322.07   1-0.67906-0.45042-0.54317-0.88374-0.49379-0.12691
   3  -3   7 6452.60  315.95   1-0.71811-0.48584-0.22191 0.24345 0.65959 0.83945
   3   3   7 6303.79  309.52   1-0.58844-0.81903 0.02812 0.36714 0.80804 0.44088
  -3   3  -8  169.76   17.17   1-0.56480-0.78099 0.71540 0.20042-0.41132-0.59150
  -3  -3  -8  177.68   14.92   1-0.70738-0.46098-0.48494-0.87443-0.51423-0.15118
   3  -3   8  181.57   14.68   1-0.73462-0.52016-0.25305 0.26117 0.62950 0.81315
   3   3   8  172.06   16.61   1-0.55217-0.80082-0.01683 0.37095 0.83355 0.47018
  -3   3  -9 3083.85  141.29   1-0.58413-0.78266 0.69132 0.12749-0.42527-0.60924
  -3  -3  -9 2963.25  129.75   1-0.73057-0.46642-0.42933-0.86772-0.53097-0.17174
   3  -3   9 2898.13  130.92   1-0.74978-0.55311-0.28411 0.27896 0.59757 0.78501
   3   3   9 3083.06  136.00   1-0.51595-0.78266-0.05915 0.37740 0.85457 0.49498
  -3   3 -10   26.18   16.59   1-0.59872-0.77954 0.67200 0.05924-0.43580-0.62354
  -3  -3 -10   32.14   15.75   1-0.74957-0.46767-0.37608-0.86339-0.54469-0.18928
   3  -3  10   23.58   12.35   1-0.76332-0.58418-0.31468 0.29725 0.56418 0.75522
   3   3  10   32.86   11.83   1-0.47992-0.76466-0.09907 0.38624 0.87169 0.51585
  -3   3 -11 1479.82   69.44   1-0.60939-0.77249 0.65721-0.00448-0.44351-0.63500
  -3  -3 -11 1421.85   67.30   1-0.76509-0.46557-0.32495-0.86116-0.55589-0.20401
   3  -3  11 1499.62   68.17   1-0.77545-0.61408-0.34533 0.31547 0.52860 0.72344
   3   3  11 1579.34   71.36   1-0.44402-0.74682-0.13695 0.39714 0.88548 0.53341
  -3   3 -12    5.38   16.99   1-0.61683-0.76221 0.64653-0.06409-0.44888-0.64414
  -3  -3 -12   17.03   16.90   1-0.77769-0.46043-0.27565-0.86078-0.56498-0.21690
   3  -3  12   10.28   12.88   1-0.78589-0.64230-0.37564 0.33402 0.49118 0.68983
   3   3  12   18.27   14.81   1-0.40830-0.72915-0.17297 0.40988 0.89630 0.54801
  -3   3 -13 2026.65  106.68   1-0.62158-0.74924 0.63956-0.12000-0.45230-0.65133
  -3  -3 -13 1999.22  105.41   1-0.78776-0.45276-0.22793-0.86199-0.57225-0.22796
   3  -3  13 2053.09  108.18   1-0.79455-0.66874-0.40554 0.35298 0.45189 0.65434
   3   3  13 1955.54  102.69   1-0.37271-0.71162-0.20735 0.42428 0.90448 0.55997
  -3   3 -14  160.44   19.94   1-0.62404-0.73398 0.63590-0.17260-0.45408-0.65687
  -3  -3 -14  146.29   18.59   1-0.79562-0.44289-0.18158-0.86456-0.57793-0.23744
   3  -3  14  131.34   18.92   1-0.80132-0.69329-0.43497 0.37242 0.41070 0.61695
   3   3  14  143.71   18.00   1-0.33723-0.69420-0.24025 0.44014 0.91024 0.56951
  -3   3 -15 1406.45   61.47   1-0.62451-0.71673 0.63519-0.22225-0.45442-0.66097
  -3  -3 -15 1412.11   61.46   1-0.80152-0.43105-0.13638-0.86828-0.58219-0.24550
   3  -3  15 1388.85   63.70   1-0.80607-0.71582-0.46385 0.39240 0.36753 0.57759
   3   3  15 1443.16   65.93   1-0.30186-0.67651-0.27177 0.45810 0.91378 0.57659
   3   4 -14  311.40   27.30   1-0.49645-0.43055 0.78899 0.08044-0.36198-0.89896
   3  -4 -14  321.09   27.44   1-0.74376-0.06055-0.39329-0.93381-0.54049-0.35258
  -3  -4  14  313.92   22.86   1-0.76751-0.83605-0.64101 0.06455 0.00501 0.54483
  -3   4  14  313.65   25.01   1-0.03479-0.72050-0.47459 0.06141 0.87951 0.69072
   3   4 -13  855.66   60.26   1-0.48651-0.43835 0.79838 0.13877-0.35481-0.88802
   3  -4 -13  849.59   57.97   1-0.72261-0.05715-0.44940-0.94101-0.52523-0.33349
  -3  -4  13  797.72   56.20   1-0.77397-0.82479-0.63255 0.02409 0.02898 0.56492
  -3   4  13  822.30   55.72   1-0.05327-0.72096-0.46239 0.02480 0.88507 0.69252
   3   4 -12  188.48   21.18   1-0.47265-0.44223 0.81098 0.20032-0.34480-0.87424
   3  -4 -12  220.76   18.30   1-0.69754-0.04983-0.50621-0.94891-0.50713-0.31157
  -3  -4  12  194.18   17.19   1-0.77936-0.81246-0.62451-0.01677 0.05070 0.58276
  -3   4  12  216.61   26.03   1-0.07061-0.72028-0.45071-0.01232 0.88986 0.69357
   3   4 -11  702.49   28.22   1-0.45422-0.44153 0.82691 0.26518-0.33150-0.85716
   3  -4 -11  695.81   26.89   1-0.66809-0.03814-0.56352-0.95732-0.48588-0.28649
  -3  -4  11  674.15   24.70   1-0.78380-0.79918-0.61703-0.05821 0.07006 0.59825
  -3   4  11  655.26   27.18   1-0.08667-0.71832-0.43969-0.05010 0.89395 0.69390
   3   4 -10  339.81   21.27   1-0.43043-0.43547 0.84612 0.33333-0.31433-0.83621
   3  -4 -10  309.67   18.13   1-0.63378-0.02158-0.62104-0.96592-0.46111-0.25790
  -3  -4  10  321.33   17.73   1-0.78739-0.78505-0.61028-0.10037 0.08693 0.61123
  -3   4  10  306.79   22.02   1-0.10152-0.71507-0.42931-0.08862 0.89743 0.69340
   3   4  -9   -3.66   14.69   1-0.40025-0.42291 0.86845 0.40480-0.29255-0.81072
   3  -4  -9    1.18   10.71   1-0.59406 0.00037-0.67828-0.97426-0.43244-0.22541
  -3  -4   9   -4.43    9.98   1-0.79005-0.77120-0.60476-0.14325 0.10034 0.62025
  -3   4   9   -3.60   10.91   1-0.11446-0.70999-0.42013-0.12825 0.90021 0.69243
   3   4  -9   -2.44    9.25   1-0.72873-0.74702 0.67572 0.21305-0.11109-0.62972
   3   4  -8  521.93   25.87   1-0.36296-0.40335 0.89314 0.47843-0.26562-0.78000
   3  -4  -8  520.02   23.99   1-0.54844 0.02824-0.73457-0.98163-0.39951-0.18865
  -3  -4   8  496.97   25.46   1-0.79216-0.75554-0.60000-0.18736 0.11163 0.62773
  -3   4   8  486.98   25.55   1-0.12541-0.70291-0.41226-0.16919 0.90238 0.69085
   3   4  -8  434.16   26.28   1-0.75001-0.78640 0.65936 0.24548-0.05203-0.56684
   3   4  -7 1049.83   52.96   1-0.31746-0.37559 0.91925 0.55347-0.23278-0.74336
   3  -4  -7 1123.19   56.30   1-0.49648 0.06245-0.78895-0.98711-0.36200-0.14732
  -3  -4   7 1031.47   53.01   1-0.79360-0.73920-0.59654-0.23276 0.11969 0.63198
  -3   4   7 1062.24   52.54   1-0.13395-0.69343-0.40606-0.21179 0.90397 0.68868
   3   4  -7 1092.17   54.87   1-0.77042-0.82489 0.63734 0.27224 0.01557-0.49541
   3   4  -6  215.43   16.99   1-0.26298-0.33884 0.94520 0.62836-0.19346-0.70024
   3  -4  -6  215.77   17.28   1-0.43791 0.10327-0.84024-0.98948-0.31972-0.10122
  -3  -4   6  186.80   17.12   1-0.79436-0.72219-0.59461-0.27970 0.12414 0.63261
   3  -4  -6  201.40   13.33   1-0.67437-0.13432-0.14870-0.29771 0.72326 0.94515
  -3   4   6  213.83   16.44   1-0.13951-0.68096-0.40199-0.25653 0.90495 0.68590
   3   4  -6  204.40   14.55   1-0.78810-0.86065 0.60886 0.29255 0.09042-0.41674
  -3   4   5 2230.73  115.75   1 0.37539-0.14822 0.88747 0.98792 0.26733 0.04519
   3   4  -5 2250.57  115.89   1-0.19897-0.29230 0.96887 0.70103-0.14725-0.65046
  -3  -4   5 2170.38  113.52   1-0.79442-0.70447-0.59445-0.32840 0.12451 0.62917
   3  -4  -5 2140.24  113.59   1-0.66313-0.14088-0.13148-0.23163 0.73685 0.96254
  -3   4   5 1985.16  106.86   1-0.14125-0.66468-0.40071-0.30407 0.90524 0.68245
   3   4  -5 2073.22  110.33   1-0.80118-0.89180 0.57369 0.30613 0.17023-0.33311
  -3   4   4   87.44   16.53   1 0.30406-0.20184 0.92787 0.97936 0.21584-0.01005
   3   4  -4   83.95   14.92   1-0.12620-0.23729 0.98746 0.76856-0.09473-0.59413
  -3  -4   4   77.66   13.42   1-0.79369-0.68596-0.59632-0.37914 0.12020 0.62105
   3  -4  -4   70.96    9.59   1-0.65763-0.15318-0.12325-0.17454 0.74318 0.97266
  -3   4   4   79.48   12.59   1-0.13794-0.64334-0.40314-0.35530 0.90467 0.67812
   3   4  -4   87.31   12.86   1-0.80818-0.91689 0.53212 0.31335 0.25233-0.24719
  -3   4   3    2.46   14.05   1 0.22753-0.26064 0.96043 0.96296 0.16060-0.06905
   3   4  -3   -0.31   10.72   1-0.04586-0.17471 0.99827 0.82830-0.03673-0.53233
  -3  -4   3    1.58   10.39   1-0.79195-0.66645-0.60050-0.43217 0.11046 0.60750
   3  -4  -3    6.03    7.92   1-0.65662-0.16996-0.12174-0.12418 0.74432 0.97759
  -3   4   3    2.66    9.25   1-0.12769-0.61507-0.41061-0.41159 0.90282 0.67251
   3   4  -3   -3.40    8.55   1-0.80823-0.93504 0.48527 0.31528 0.33355-0.16214
  -3   4   2 1083.55   53.44   1 0.14733-0.32318 0.98373 0.93728 0.10271-0.13061
   3   4  -2 1147.89   57.01   1 0.03963-0.10692 0.99890 0.87786 0.02497-0.46681
  -3  -4   2 1079.41   54.12   1-0.78891-0.64482-0.60719-0.48858 0.09449 0.58778
   3  -4  -2 1097.79   54.37   1-0.65913-0.19026-0.12547-0.07905 0.74148 0.97854
  -3   4   2 1175.56   59.79   1-0.10740-0.57676-0.42515-0.47494 0.89872 0.66466
   3   4  -2 1044.60   51.95   1-0.80128-0.94614 0.43474 0.31348 0.41102-0.08084
   3   4  -1   34.48   11.30   1 0.12723-0.03706 0.98794 0.91585 0.08820-0.39979
  -3   4   1   21.43   10.36   1 0.06558-0.38719 0.99688 0.90148 0.04371-0.19341
  -3  -4   1   23.96   10.82   1-0.78392-0.62211-0.61682-0.54713 0.07060 0.56001
   3  -4  -1   16.87    9.26   1-0.66438-0.21332-0.13337-0.03810 0.73539 0.97623
  -3   4   1   23.26    9.21   1-0.07114-0.52259-0.45035-0.54886 0.89001 0.65240
   3   4  -1   27.34    9.61   1-0.78789-0.95085 0.38207 0.30960 0.48294-0.00511
   3   4   0 1605.22   77.13   1 0.21333 0.03136 0.96534 0.94209 0.15035-0.33388
  -3   4   0 1572.90   75.62   1-0.01539-0.45043 0.99977 0.85541-0.01474-0.25565
  -3  -4   0 1299.43   62.33   1-0.77614-0.59660-0.62943-0.60866 0.03752 0.52305
   3  -4   0 1659.67   78.96   1-0.67176-0.23849-0.14465-0.00052 0.72650 0.97114
  -3   4   0 1542.53   79.26   1-0.00920-0.44263-0.49105-0.63837 0.87108 0.62972
   3   4   0 1546.32   73.42   1-0.76911-0.95016 0.32885 0.30516 0.54800 0.06376
   3   4   1 3140.16  141.39   1 0.29534 0.09566 0.93212 0.95783 0.20955-0.27092
  -3   4  -1 3067.97  138.17   1-0.09335-0.51065 0.99309 0.79974-0.07101-0.31567
  -3  -4  -1 3136.53  143.87   1-0.76414-0.56688-0.64501-0.67315-0.00678 0.47487
   3  -4   1 2540.68  113.63   1-0.68073-0.26525-0.15869 0.03429 0.71513 0.96356
   3   4   1 3007.89  136.92   1-0.74609-0.94526 0.27629 0.30129 0.60581 0.12526
   3   4   2   20.91   11.57   1 0.37090 0.15350 0.89033 0.96499 0.26409-0.21263
  -3   4  -2   12.61   13.42   1-0.16603-0.56557 0.97835 0.73606-0.12347-0.37194
  -3  -4  -2   18.24    9.27   1-0.74565-0.53067-0.66316-0.74021-0.06491 0.41286
   3  -4   2   12.50    8.44   1-0.69084-0.29316-0.17499 0.06684 0.70150 0.95372
   3   4   2   21.84   12.47   1-0.71992-0.93717 0.22521 0.29898 0.65649 0.17975
  -3   4  -3    3.63   12.66   1-0.23203-0.61396 0.95753 0.66640-0.17112-0.42302
  -3  -4  -3   -1.97    6.56   1-0.43398-0.19935-0.84334-0.96743-0.31689 0.15601
  -3  -4  -3    8.12    6.89   1-0.71702-0.48433-0.68279-0.80875-0.14023 0.33366
   3  -4   3    0.46   11.32   1-0.70174-0.32185-0.19317 0.09752 0.68574 0.94175
   3   4   3    0.82    8.77   1-0.69150-0.92682 0.17607 0.29860 0.70058 0.22765
  -3   4  -4 1517.79   82.30   1-0.29055-0.65474 0.93276 0.59270-0.21336-0.46905
  -3  -4  -4 1431.55   75.87   1-0.49410-0.24171-0.79123-0.96423-0.36028 0.10879
  -3  -4  -4 1038.06   59.40   1-0.67334-0.42157-0.70102-0.87593-0.23488 0.23454
   3  -4   4 1457.53   78.89   1-0.71308-0.35100-0.21289 0.12666 0.66796 0.92776
   3   4   4 1398.04   75.16   1-0.66152-0.91492 0.12906 0.30036 0.73873 0.26960
  -3   4  -5   78.05   18.32   1-0.34131-0.68777 0.90609 0.51709-0.25000-0.50949
  -3  -4  -5   66.42   10.26   1-0.54647-0.27633-0.73680-0.95871-0.39809 0.06716
  -3  -4  -5   50.01   10.04   1-0.60214-0.33256-0.71322-0.93703-0.35879 0.10663
   3  -4   5   68.93   10.45   1-0.72460-0.38031-0.23387 0.15454 0.64826 0.91185
   3   4   5   78.10   14.07   1-0.63071-0.90200 0.08452 0.30459 0.77139 0.30595
  -3   4  -6 2237.81   57.23   1-0.38456-0.71328 0.87921 0.44128-0.28122-0.54451
  -3  -4  -6 2155.72   57.36   1-0.59170-0.30381-0.68142-0.95223-0.43074 0.03069
   3  -4   6 2120.74   58.22   1-0.73606-0.40957-0.25588 0.18139 0.62668 0.89406
   3   4   6 2200.47   58.84   1-0.59905-0.88840 0.04184 0.31068 0.79961 0.33794
  -3   4  -7   39.60   11.38   1-0.42084-0.73182 0.85346 0.36659-0.30740-0.57449
  -3  -4  -7   40.60   14.04   1-0.63056-0.32491-0.62602-0.94574-0.45878-0.00117
   3  -4   7   43.34   11.23   1-0.74724-0.43854-0.27871 0.20741 0.60327 0.87444
   3   4   7   41.08   10.70   1-0.56696-0.87436 0.00116 0.31878 0.82374 0.36586
  -3   4  -8  123.53   20.29   1-0.45085-0.74424 0.82972 0.29375-0.32907-0.59983
  -3  -4  -8   99.32   15.06   1-0.66381-0.34041-0.57119-0.93982-0.48278-0.02900
   3  -4   8  113.31   12.70   1-0.75779-0.46658-0.30180 0.23314 0.57850 0.85319
   3   4   8  110.97   13.71   1-0.53459-0.86006-0.03766 0.32872 0.84426 0.39017
  -3   4  -9  277.90   22.47   1-0.47532-0.75098 0.80860 0.22369-0.34673-0.62127
  -3  -4  -9  303.66   19.97   1-0.69218-0.35102-0.51730-0.93484-0.50326-0.05330
   3  -4   9  302.86   18.68   1-0.76789-0.49447-0.32580 0.25800 0.55152 0.83001
   3   4   9  278.42   16.49   1-0.50209-0.84558-0.07474 0.34040 0.86157 0.41122
  -3   4 -10  380.78   27.13   1-0.49498-0.75290 0.79039 0.15655-0.36092-0.63923
  -3  -4 -10  435.31   25.94   1-0.71631-0.35740-0.46451-0.93096-0.52068-0.07455
   3  -4  10  406.21   27.08   1-0.77722-0.52157-0.35017 0.28250 0.52278 0.80507
   3   4  10  400.89   26.26   1-0.46943-0.83097-0.11032 0.35358 0.87605 0.42948
  -3   4 -11   13.44   19.62   1-0.51046-0.75065 0.77521 0.09243-0.37210-0.65419
  -3  -4 -11    5.73   15.78   1-0.73676-0.36010-0.41289-0.92825-0.53544-0.09313
   3  -4  11    7.46   14.75   1-0.78562-0.54775-0.37478 0.30675 0.49227 0.77837
   3   4  11   14.47   13.14   1-0.43665-0.81626-0.14451 0.36817 0.88794 0.44515
  -3   4 -12  495.81   33.91   1-0.52234-0.74480 0.76304 0.03132-0.38067-0.66654
  -3  -4 -12  484.17   33.18   1-0.75398-0.35956-0.36241-0.92668-0.54787-0.10938
   3  -4  12  456.34   30.42   1-0.79295-0.57286-0.39953 0.33087 0.45999 0.74989
   3   4  12  459.99   33.84   1-0.40378-0.80144-0.17741 0.38403 0.89748 0.45847
  -3   4 -13   -1.76   17.32   1-0.53109-0.73582 0.75376-0.02688-0.38699-0.67663
  -3  -4 -13   13.90   16.38   1-0.76835-0.35634-0.31301-0.92619-0.55825-0.12323
   3  -4  13   -0.54   18.30   1-0.79908-0.59678-0.42431 0.35495 0.42592 0.71962
   3   4  13   -3.18   17.34   1-0.37079-0.78651-0.20916 0.40105 0.90485 0.46962
  -3   4 -14  249.56   21.91   1-0.53711-0.72410 0.74724-0.08235-0.39133-0.68475
  -3  -4 -14  297.31   27.56   1-0.78020-0.35044-0.26461-0.92671-0.56680-0.13557
   3  -4  14  263.67   21.71   1-0.80388-0.61936-0.44905 0.37908 0.39002 0.68752
   3   4  14  264.77   20.93   1-0.33767-0.77144-0.23985 0.41913 0.91018 0.47873
   3   5 -12  733.01   40.96   1-0.35110-0.39772 0.90035 0.26897-0.25706-0.87719
   3  -5 -12  841.71   44.15   1-0.67221 0.05249-0.55601-0.97786-0.48885-0.20256
  -3  -5  12  796.01   39.68   1-0.77997-0.73640-0.62354 0.00474 0.05326 0.67652
  -3   5  12  789.43   40.98   1-0.07061-0.79711-0.45071-0.03370 0.88986 0.60288
   3   5 -11   21.56   23.06   1-0.32946-0.39382 0.91277 0.33031-0.24145-0.85778
   3  -5 -11   28.31   15.67   1-0.64128 0.06567-0.60918-0.98212-0.46652-0.17641
  -3  -5  11   21.66   12.78   1-0.78396-0.72267-0.61675-0.03738 0.07078 0.69017
  -3   5  11   22.41   18.30   1-0.08596-0.79445-0.44017-0.07197 0.89378 0.60304
   3   5 -10  738.90   36.04   1-0.30306-0.38515 0.92666 0.39313-0.22238-0.83492
   3  -5 -10  759.41   34.08   1-0.60629 0.08291-0.66157-0.98560-0.44127-0.14733
  -3  -5  10  734.35   33.58   1-0.78719-0.70818-0.61069-0.08023 0.08594 0.70145
  -3   5  10  669.86   33.55   1-0.10011-0.79046-0.43030-0.11099 0.89711 0.60236
   3   5  -9   34.07   12.33   1-0.27144-0.37127 0.94153 0.45694-0.19956-0.80830
   3  -5  -9   35.01   15.10   1-0.56702 0.10442-0.71272-0.98784-0.41292-0.11516
  -3  -5   9   26.35   11.31   1-0.78971-0.69298-0.60549-0.12395 0.09858 0.71021
  -3   5   9   42.85   16.42   1-0.11229-0.78462-0.42168-0.15117 0.89976 0.60125
   3   5  -8  354.32   22.92   1-0.23422-0.35179 0.95671 0.52106-0.17270-0.77764
   3  -5  -8  363.95   20.94   1-0.52331 0.13039-0.76203-0.98824-0.38137-0.07978
  -3  -5   8  377.57   24.39   1-0.79149-0.67832-0.60157-0.16820 0.10794 0.71525
  -3   5   8  375.18   23.29   1-0.12248-0.77678-0.41438-0.19268 0.90182 0.59956
   3   5  -7   96.60   16.94   1-0.19095-0.32591 0.97135 0.58468-0.14146-0.74291
   3  -5  -7  100.01   17.92   1-0.47508 0.16086-0.80881-0.98611-0.34656-0.04114
  -3  -5   7   95.86   13.85   1-0.79276-0.66182-0.59859-0.21408 0.11494 0.71844
  -3   5   7   97.00   14.34   1-0.13028-0.76656-0.40873-0.23585 0.90330 0.59729
   3   5  -6  541.42   33.49   1-0.14197-0.29469 0.98416 0.64643-0.10611-0.70375
   3  -5  -6  518.53   28.41   1-0.42243 0.19576-0.85225-0.98065-0.30855 0.00068
  -3  -5   6  449.15   27.54   1-0.79342-0.64470-0.59698-0.26133 0.11868 0.71836
  -3   5   6  494.26   28.49   1-0.13517-0.75342-0.40517-0.28110 0.90419 0.59442
  -3   5   5 1328.58   68.78   1 0.36848-0.23225 0.89184 0.97134 0.26234-0.05044
   3   5  -5 1290.22   66.54   1-0.08734-0.25782 0.99394 0.70515-0.06668-0.66051
  -3  -5   5 1177.34   69.53   1-0.79344-0.62695-0.59693-0.31016 0.11878 0.71465
   3  -5  -5 1115.91   60.89   1-0.74601-0.14733-0.27613-0.35552 0.60597 0.92298
  -3   5   5 1284.35   68.33   1-0.13638-0.73661-0.40428-0.32901 0.90440 0.59088
   3   5  -5 1221.86   63.65   1-0.80237-0.96978 0.44044 0.15143 0.40274-0.19126
  -3   5   4  434.43   25.26   1 0.30800-0.27501 0.92590 0.95644 0.21869-0.09785
   3   5  -4  457.30   24.16   1-0.02767-0.21591 0.99933 0.75948-0.02361-0.61364
  -3  -5   4  441.46   21.15   1-0.79273-0.60846-0.59865-0.36074 0.11479 0.70684
   3  -5  -4  442.35   21.53   1-0.73771-0.15682-0.25916-0.28969 0.62338 0.94418
  -3   5   4  461.74   22.38   1-0.13285-0.71506-0.40686-0.38040 0.90377 0.58649
   3   5  -4  427.63   21.07   1-0.79302-0.97852 0.39978 0.15955 0.45966-0.13052
  -3   5   3   12.72   11.69   1 0.24462-0.32068 0.95407 0.93565 0.17294-0.14736
   3   5  -3   10.82    9.73   1 0.03599-0.16996 0.99910 0.80817 0.02234-0.56387
  -3  -5   3    4.30   15.14   1-0.79115-0.58910-0.60234-0.41329 0.10612 0.69436
   3  -5  -3    8.13    9.41   1-0.73252-0.16942-0.24893-0.23061 0.63359 0.95818
  -3   5   3    9.89   11.06   1-0.12293-0.68711-0.41405-0.43641 0.90191 0.58087
   3   5  -3   13.93    8.46   1-0.77984-0.98343 0.35753 0.16610 0.51381-0.07255
  -3   5   2  566.29   33.24   1 0.17931-0.36834 0.97571 0.90832 0.12579-0.19817
   3   5  -2  578.15   34.83   1 0.10239-0.12130 0.99225 0.85028 0.07027-0.51215
  -3  -5   2  552.40   32.85   1-0.78843-0.56767-0.60818-0.46903 0.09208 0.67657
   3  -5  -2  501.89   30.75   1-0.73000-0.18470-0.24409-0.17691 0.63836 0.96673
  -3   5   2  492.83   29.62   1-0.10401-0.65017-0.42755-0.49871 0.89798 0.57319
   3   5  -2  561.42   31.56   1-0.76320-0.98497 0.31439 0.17171 0.56451-0.01815
   3   5  -1  637.15   36.93   1 0.16990-0.07153 0.97824 0.88522 0.11900-0.45963
  -3   5   1  617.37   37.02   1 0.11330-0.41661 0.99048 0.87414 0.07814-0.24961
  -3  -5   1  609.07   35.05   1-0.78414-0.54565-0.61643-0.52620 0.07158 0.65220
   3  -5  -1  523.54   32.53   1-0.72976-0.20226-0.24362-0.12759 0.63881 0.97098
  -3   5   1  571.54   32.98   1-0.07109-0.59938-0.45038-0.57028 0.88999 0.56170
   3   5  -1  606.00   34.26   1-0.74374-0.98360 0.27140 0.17748 0.61088 0.03201
   3   5   0  335.50   20.90   1 0.23674-0.02235 0.95706 0.91286 0.16725-0.40763
  -3   5   0  275.54   17.15   1 0.04786-0.46431 0.99837 0.83308 0.03091-0.30063
  -3  -5   0  343.93   20.48   1-0.77765-0.52145-0.62717-0.58584 0.04364 0.62037
   3  -5   0  327.17   17.79   1-0.73141-0.22170-0.24679-0.08190 0.63571 0.97166
   3   5   0  304.04   18.46   1-0.72194-0.97987 0.22892 0.18377 0.65298 0.07792
   3   5   1  281.07   18.64   1 0.30173 0.02492 0.92902 0.93378 0.21416-0.35696
  -3   5  -1  255.73   18.43   1-0.01569-0.51013 0.99976 0.78552-0.01495-0.35030
   3  -5   1  274.71   16.56   1-0.73460-0.24269-0.25300-0.03925 0.62956 0.96930
   3   5   1  275.01   15.11   1-0.69827-0.97428 0.18732 0.19092 0.69087 0.11962
   3   5   2  173.55   14.36   1 0.36347 0.06894 0.89495 0.94867 0.25872-0.30864
  -3   5  -2  189.64   16.14   1-0.07628-0.55296 0.99535 0.73211-0.05869-0.39778
  -3  -5  -2  185.67   15.87   1-0.75367-0.46203-0.65597-0.71247-0.04087 0.52811
   3  -5   2  175.92   16.45   1-0.73902-0.26490-0.26178 0.00082 0.62073 0.96427
   3   5   2  185.59   13.99   1-0.67316-0.96724 0.14682 0.19919 0.72476 0.15732
  -3   5  -3 1247.62   42.73   1-0.13275-0.59168 0.98614 0.67396-0.09946-0.44235
  -3  -5  -3 1265.58   42.08   1-0.41633-0.10469-0.85682-0.96005-0.30415 0.25948
  -3  -5  -3 1323.74   47.83   1-0.73230-0.42294-0.67332-0.77874-0.10177 0.46333
   3  -5   3 1255.35   43.50   1-0.74439-0.28807-0.27274 0.03871 0.60949 0.95682
   3   5   3 1276.57   43.25   1-0.64710-0.95909 0.10780 0.20893 0.75473 0.19100
  -3   5  -4  982.36   38.56   1-0.18452-0.62569 0.97325 0.61213-0.13682-0.48352
  -3  -5  -4  927.26   32.32   1-0.46941-0.14001-0.81386-0.96600-0.34246 0.21734
  -3  -5  -4  898.36   41.83   1-0.70107-0.37245-0.69075-0.84510-0.17705 0.38349
   3  -5   4  943.30   37.93   1-0.75045-0.31193-0.28556 0.07474 0.59604 0.94715
   3   5   4  944.90   35.96   1-0.62003-0.95008 0.06981 0.21971 0.78145 0.22150
  -3   5  -5   35.79   12.17   1-0.23119-0.65483 0.95784 0.54790-0.17051-0.52057
  -3  -5  -5   27.67   12.33   1-0.51759-0.17044-0.76797-0.96902-0.37724 0.17874
   3  -5   5   23.66    9.95   1-0.75698-0.33625-0.29997 0.10920 0.58051 0.93541
   3   5   5   34.61   16.88   1-0.59229-0.94040 0.03307 0.23175 0.80504 0.24887
  -3   5  -6  465.14   28.06   1-0.27258-0.67848 0.94103 0.48215-0.20039-0.55424
  -3  -5  -6  519.03   30.28   1-0.56091-0.19600-0.72006-0.97002-0.40851 0.14365
   3  -5   6  497.69   28.72   1-0.76357-0.36031-0.31527 0.14268 0.56352 0.92185
   3   5   6  502.82   29.29   1-0.56402-0.93018-0.00244 0.24499 0.82575 0.27337
  -3   5  -7  457.45   29.20   1-0.30878-0.69694 0.92376 0.41595-0.22651-0.58417
  -3  -5  -7  511.89   32.18   1-0.59954-0.21689-0.67089-0.96975-0.43640 0.11193
   3  -5   7  439.17   26.77   1-0.77043-0.38495-0.33219 0.17463 0.54412 0.90626
   3   5   7  440.32   26.95   1-0.53531-0.91953-0.03682 0.25939 0.84384 0.29525
  -3   5  -8  477.10   28.17   1-0.34000-0.71043 0.90684 0.35009-0.24905-0.61050
  -3  -5  -8  517.28   21.98   1-0.63379-0.23338-0.62102-0.96880-0.46112 0.08339
   3  -5   8  466.76   22.58   1-0.77718-0.40948-0.35007 0.20561 0.52290 0.88884
   3   5   8  518.08   24.99   1-0.50628-0.90852-0.07006 0.27489 0.85951 0.31466
  -3   5  -9  400.31   31.19   1-0.36658-0.71927 0.89087 0.28519-0.26824-0.63349
  -3  -5  -9  400.17   25.94   1-0.66397-0.24581-0.57090-0.96759-0.48290 0.05778
   3  -5   9  367.89   23.33   1-0.78366-0.43373-0.36875 0.23580 0.49989 0.86963
   3   5   9  336.95   21.70   1-0.47687-0.89717-0.10235 0.29138 0.87299 0.33192
  -3   5 -10  540.47   28.34   1-0.38888-0.72383 0.87630 0.22169-0.28433-0.65338
  -3  -5 -10  657.02   31.14   1-0.69044-0.25452-0.52084-0.96643-0.50200 0.03485
   3  -5  10  652.70   29.97   1-0.78970-0.45756-0.38809 0.26532 0.47512 0.84867
   3   5  10  695.91   33.37   1-0.44717-0.88552-0.13370 0.30880 0.88439 0.34711
  -3   5 -11  124.00   18.54   1-0.40729-0.72450 0.86344 0.15989-0.29762-0.67046
  -3  -5 -11  123.54   25.21   1-0.71351-0.25985-0.47104-0.96554-0.51866 0.01437
   3  -5  11  124.68   18.93   1-0.79518-0.48081-0.40796 0.29431 0.44860 0.82595
   3   5  11  115.68   20.68   1-0.41716-0.87358-0.16417 0.32709 0.89387 0.36036
  -3   5 -12  803.20   41.35   1-0.42218-0.72184 0.85244 0.09974-0.30837-0.68483
  -3  -5 -12  870.01   44.46   1-0.73351-0.26209-0.42162-0.96503-0.53309-0.00388
   3  -5  12  856.77   40.20   1-0.79994-0.50335-0.42825 0.32288 0.42033 0.80148
   3   5  12  881.73   42.25   1-0.38687-0.86134-0.19384 0.34620 0.90152 0.37179
   3   6 -10  115.29   21.77   1-0.18485-0.34369 0.97316 0.41872-0.13706-0.84055
   3  -6 -10  106.23   20.14   1-0.59240 0.17381-0.68050-0.98367-0.43124-0.04657
  -3  -6  10  128.15   17.84   1-0.78352-0.62784-0.61754-0.06654 0.06877 0.77549
  -3   6  10  122.26   23.09   1-0.08200-0.84930-0.44291-0.14491 0.89280 0.50761
   3   6  -9  330.76   28.20   1-0.15453-0.33113 0.98125 0.47575-0.11517-0.81486
   3  -6  -9  339.25   22.34   1-0.55522 0.19323-0.72676-0.98102-0.40440-0.01591
  -3  -6   9  341.01   23.62   1-0.78590-0.61250-0.61317-0.11108 0.07978 0.78262
  -3   6   9  306.75   23.62   1-0.09293-0.84205-0.43533-0.18621 0.89545 0.50622
   3   6  -8  605.81   43.15   1-0.12002-0.31437 0.98865 0.53210-0.09026-0.78614
   3  -6  -8  650.36   43.98   1-0.51473 0.21596-0.77089-0.97624-0.37518 0.01713
  -3  -6   8  640.05   45.36   1-0.78765-0.59653-0.60977-0.15659 0.08820 0.78716
  -3   6   8  588.10   43.45   1-0.10141-0.83251-0.42939-0.22907 0.89740 0.50441
   3   6  -7  881.98   40.46   1-0.08135-0.29346 0.99473 0.58711-0.06235-0.75443
   3  -6  -7  852.94   35.06   1-0.47103 0.24192-0.81243-0.96887-0.34363 0.05250
  -3  -6   7  915.00   40.15   1-0.78878-0.57994-0.60746-0.20320 0.09382 0.78890
  -3   6   7  864.40   40.79   1-0.10736-0.82043-0.42519-0.27368 0.89871 0.50197
   3   6  -6    3.88   17.74   1-0.03870-0.26856 0.99875 0.64007-0.03156-0.71984
   3  -6  -6   24.55   13.92   1-0.42429 0.27090-0.85084-0.95838-0.30989 0.09006
  -3  -6   6   12.48   16.39   1-0.78928-0.56273-0.60640-0.25106 0.09638 0.78759
  -3   6   6    4.70   14.65   1-0.11022-0.80527-0.42315-0.32046 0.89932 0.49883
  -3   6   5 1731.85   75.27   1 0.37786-0.30000 0.88588 0.94443 0.26911-0.13432
   3   6  -5 1732.26   75.41   1 0.00755-0.24006 0.99997 0.69021 0.00182-0.68262
  -3  -6   5 1716.35   76.48   1-0.78913-0.54485-0.60674-0.30030 0.09558 0.78291
  -3   6   5 1581.05   73.81   1-0.10925-0.78627-0.42385-0.36996 0.89911 0.49486
  -3   6   4   76.99   14.86   1 0.32609-0.33405 0.91649 0.92607 0.23174-0.17544
   3   6  -4   66.49   18.00   1 0.05700-0.20834 0.99766 0.73686 0.03751-0.64313
  -3  -6   4   71.15   17.57   1-0.78822-0.52622-0.60861-0.35109 0.09102 0.77447
   3  -6  -4   70.35   15.58   1-0.78135-0.12379-0.36188-0.37181 0.50845 0.92001
  -3   6   4   63.40   13.09   1-0.10334-0.76234-0.42803-0.42295 0.89783 0.48982
  -3   6   3  329.90   20.60   1 0.27257-0.36986 0.94255 0.90318 0.19311-0.21783
   3   6  -3  326.20   21.56   1 0.10891-0.17417 0.99121 0.77936 0.07498-0.60188
  -3  -6   3  328.35   18.25   1-0.78642-0.50670-0.61218-0.40357 0.08225 0.76182
   3  -6  -3  321.84   17.40   1-0.77625-0.13647-0.34751-0.30857 0.52599 0.94135
  -3   6   2  845.45   28.86   1 0.21796-0.40676 0.96377 0.87545 0.15369-0.26101
   3   6  -2  792.20   27.77   1 0.16246-0.13837 0.98014 0.81723 0.11363-0.55944
  -3  -6   2  797.75   30.62   1-0.78349-0.48606-0.61758-0.45789 0.06866 0.74436
   3  -6  -2  775.95   27.47   1-0.77272-0.15073-0.33810-0.25030 0.53719 0.95636
   3   6  -1 1037.52   31.21   1 0.21658-0.10192 0.96424 0.85014 0.15269-0.51659
  -3   6   1 1008.70   31.57   1 0.16302-0.44403 0.98000 0.84273 0.11403-0.30436
  -3  -6   1  996.05   32.59   1-0.77909-0.46393-0.62494-0.51416 0.04956 0.72138
   3  -6  -1 1071.92   33.56   1-0.77069-0.16647-0.33284-0.19618 0.54336 0.96633
   3   6  -1  996.20   32.94   1-0.68132-0.99801 0.15963 0.04431 0.71436 0.04479
   3   6   0  -10.21   10.19   1 0.27071-0.06550 0.94336 0.87821 0.19177-0.47376
  -3   6   0   15.73   15.79   1 0.10853-0.48077 0.99128 0.80505 0.07471-0.34747
  -3  -6   0   -9.05   12.91   1-0.77268-0.43980-0.63433-0.57246 0.02404 0.69199
   3  -6   0    1.11   15.29   1-0.77000-0.18357-0.33110-0.14558 0.54539 0.97216
   3   6   0   -0.04   12.28   1-0.66061-0.99538 0.12769 0.06113 0.73978 0.07402
   3   6   1  668.45   25.68   1 0.32381-0.03012 0.91771 0.90152 0.23010-0.43167
  -3   6  -1  624.03   28.77   1 0.05531-0.51626 0.99780 0.76263 0.03629-0.38968
  -3  -6  -1  623.09   26.77   1-0.76348-0.41288-0.64576-0.63280-0.00902 0.65504
   3   6   1  569.61   24.09   1-0.63909-0.99177 0.09631 0.07850 0.76307 0.10105
   3   6   2   56.41   12.94   1 0.37510 0.00345 0.88766 0.92042 0.26712-0.39089
  -3   6  -2   53.35   19.37   1 0.00407-0.54975 0.99999 0.71587-0.00068-0.43045
  -3  -6  -2   68.03   14.73   1-0.75032-0.38200-0.65909-0.69505-0.05110 0.60907
   3  -6   2   70.66   12.52   1-0.77199-0.22111-0.33620-0.05295 0.53943 0.97380
   3   6   2   53.73   14.85   1-0.61657-0.98732 0.06511 0.09607 0.78459 0.12635
  -3   6  -3  183.86   18.58   1-0.04459-0.58066 0.99836 0.66523-0.03582-0.46934
  -3  -6  -3  151.11   13.95   1-0.41932-0.03067-0.85459-0.93697-0.30631 0.34805
  -3  -6  -3  150.15   18.46   1-0.73141-0.34538-0.67393-0.75880-0.10411 0.55219
   3  -6   3  147.89   15.85   1-0.77431-0.24121-0.34228-0.01017 0.53224 0.97041
   3   6   3  139.51   15.45   1-0.59331-0.98211 0.03438 0.11411 0.80423 0.14978
  -3   6  -4  108.46   15.20   1-0.09002-0.60834 0.99357 0.61150-0.06861-0.50594
  -3  -6  -4  123.11   15.87   1-0.46546-0.05905-0.81731-0.94859-0.33961 0.31092
   3  -6   4  103.34   18.54   1-0.77727-0.26195-0.35031 0.03066 0.52261 0.96459
   3   6   4  109.63   15.32   1-0.56937-0.97623 0.00413 0.13264 0.82206 0.17139
  -3   6  -5  502.79   33.89   1-0.13192-0.63248 0.98631 0.55531-0.09885-0.53999
  -3  -6  -5  518.07   34.14   1-0.50844-0.08428-0.77724-0.95743-0.37064 0.27607
   3  -6   5  490.63   33.05   1-0.78071-0.28317-0.36003 0.06980 0.51074 0.95652
   3   6   5  534.32   35.19   1-0.54483-0.96974-0.02560 0.15166 0.83815 0.19126
  -3   6  -6    7.25   18.87   1-0.17005-0.65286 0.97729 0.49735-0.12638-0.57132
  -3  -6  -6   24.94   14.27   1-0.54812-0.10621-0.73493-0.96403-0.39928 0.24361
   3  -6   6   29.31   15.22   1-0.78447-0.30471-0.37123 0.10746 0.49677 0.94636
   3   6   6   16.59   16.39   1-0.51973-0.96271-0.05483 0.17120 0.85256 0.20946
  -3   6  -7  125.05   17.06   1-0.20432-0.66937 0.96716 0.43828-0.15112-0.59986
  -3  -6  -7  118.53   16.20   1-0.58445-0.12478-0.69091-0.96892-0.42550 0.21356
   3  -6   7  100.45   19.70   1-0.78839-0.32641-0.38370 0.14385 0.48083 0.93421
   3   6   7  112.68   14.80   1-0.49417-0.95516-0.08351 0.19126 0.86534 0.22599
  -3   6  -8  154.83   23.83   1-0.23482-0.68242 0.95649 0.37880-0.17313-0.62514
  -3  -6  -8  154.54   16.18   1-0.61747-0.14005-0.64561-0.97253-0.44933 0.18590
   3  -6   8  152.69   15.47   1-0.79233-0.34813-0.39729 0.17912 0.46298 0.92017
   3   6   8  164.39   20.30   1-0.46808-0.94712-0.11176 0.21179 0.87658 0.24102
  -3   6  -9    3.73   17.26   1-0.26147-0.69134 0.94584 0.31921-0.19237-0.64818
  -3  -6  -9   12.52   18.04   1-0.64729-0.15213-0.59940-0.97523-0.47086 0.16055
   3  -6   9   14.59   15.12   1-0.79615-0.36973-0.41184 0.21344 0.44329 0.90429
   3   6   9    6.86   17.10   1-0.44151-0.93862-0.13953 0.23279 0.88633 0.25454
  -3   6 -10   25.96   16.08   1-0.28452-0.69665 0.93560 0.26004-0.20901-0.66861
  -3  -6 -10   23.25   16.24   1-0.67406-0.16114-0.55258-0.97731-0.49019 0.13740
   3  -6  10   11.78   13.85   1-0.79972-0.39107-0.42721 0.24693 0.42182 0.88661
   3   6  10   16.24   20.42   1-0.41449-0.92966-0.16683 0.25426 0.89462 0.26661
   3   7  -6  765.39   33.09   1 0.05347-0.25354 0.99795 0.61831 0.03496-0.74390
   3  -7  -6  779.56   28.80   1-0.43798 0.33422-0.84018-0.92686-0.31977 0.17091
  -3  -7   6  878.78   34.22   1-0.78174-0.47851-0.62062-0.24472 0.06087 0.84328
  -3   7   5   98.70   16.40   1 0.39792-0.35708 0.87248 0.91005 0.28359-0.21046
   3   7  -5   83.87   17.39   1 0.09274-0.23201 0.99367 0.66298 0.06331-0.71177
  -3  -7   5   73.82   18.75   1-0.78130-0.46035-0.62135-0.29437 0.05897 0.83750
  -3   7   4 2010.96   82.85   1 0.35321-0.38406 0.90115 0.88979 0.25132-0.24651
   3   7  -4 1800.80   76.95   1 0.13415-0.20834 0.98656 0.70482 0.09319-0.67809
  -3  -7   4 1744.23   78.44   1-0.78004-0.44137-0.62343-0.34536 0.05354 0.82819
  -3   7   3  574.57   34.60   1 0.30736-0.41219 0.92622 0.86590 0.21823-0.28336
   3   7  -3  537.32   29.67   1 0.17722-0.18300 0.97628 0.74349 0.12429-0.64321
  -3  -7   3  545.75   33.20   1-0.77779-0.42140-0.62696-0.39781 0.04418 0.81496
  -3   7   2  793.33   38.42   1 0.26086-0.44097 0.94754 0.83826 0.18466-0.32069
   3   7  -2  772.97   38.46   1 0.22126-0.15664 0.96264 0.77862 0.15608-0.60761
  -3  -7   2  764.03   40.94   1-0.77433-0.40022-0.63204-0.45180 0.03040 0.79730
   3   7  -1  553.87   34.11   1 0.26607-0.12955 0.94535 0.81029 0.18842-0.57151
  -3   7   1  562.87   32.15   1 0.21422-0.46990 0.96504 0.80680 0.15099-0.35811
  -3  -7   1  526.00   34.54   1-0.76933-0.37750-0.63873-0.50741 0.01158 0.77460
   3  -7  -1  477.38   27.28   1-0.79554-0.11482-0.40938-0.25198 0.44667 0.96089
   3   7   0  774.98   37.51   1 0.31088-0.10246 0.92445 0.83835 0.22077-0.53541
  -3   7   0  785.64   38.20   1 0.16798-0.49846 0.97874 0.77158 0.11762-0.39521
  -3  -7   0  796.25   39.15   1-0.76230-0.35275-0.64708-0.56467-0.01301 0.74612
   3  -7   0  833.84   44.35   1-0.79428-0.13134-0.40451-0.19825 0.45328 0.97130
   3   7   1  163.96   21.19   1 0.35514-0.07591 0.90000 0.86286 0.25272-0.49970
  -3   7  -1  174.38   17.47   1 0.12263-0.52607 0.98881 0.73270 0.08489-0.43173
  -3  -7  -1  151.92   18.67   1-0.75254-0.32527-0.65704-0.62354-0.04436 0.71090
   3  -7   1  159.81   20.27   1-0.79374-0.14859-0.40248-0.14736 0.45603 0.97785
   3   7   2 2098.39   81.99   1 0.39831-0.05048 0.87221 0.88398 0.28388-0.46477
  -3   7  -2 1958.88   76.65   1 0.07869-0.55227 0.99547 0.69042 0.05317-0.46723
   3  -7   2 1958.90   83.00   1-0.79386-0.16648-0.40292-0.09893 0.45544 0.98106
  -3   7  -3  643.73   35.43   1 0.03661-0.57661 0.99906 0.64506 0.02279-0.50140
  -3  -7  -3  619.93   32.64   1-0.43547 0.03018-0.84217-0.90368-0.31797 0.42712
   3  -7   3  607.82   34.60   1-0.79455-0.18495-0.40553-0.05269 0.45190 0.98133
  -3   7  -4 1609.49   68.49   1-0.00321-0.59871 0.99997 0.59702-0.00595-0.53394
  -3  -7  -4 1607.99   67.06   1-0.47547 0.00793-0.80846-0.91889-0.34684 0.39442
   3  -7   4 1664.80   68.50   1-0.79571-0.20389-0.41007-0.00836 0.44572 0.97895
  -3   7  -5  686.74   32.56   1-0.04057-0.61827 0.99863 0.54668-0.03291-0.56468
  -3  -7  -5  684.54   26.68   1-0.51337-0.01221-0.77227-0.93161-0.37420 0.36324
   3  -7   5  717.95   30.59   1-0.79724-0.22320-0.41630 0.03426 0.43713 0.97417
  -3   7  -6  734.50   32.22   1-0.07506-0.63501 0.99550 0.49461-0.05781-0.59338
  -3  -7  -6  658.55   28.97   1-0.54899-0.03007-0.73395-0.94219-0.39990 0.33371
   3  -7   6  696.59   32.62   1-0.79902-0.24276-0.42403 0.07539 0.42631 0.96715
   3   7   6  658.77   32.06   1-0.46575-0.98549-0.11423 0.09037 0.87751 0.14366
   4   0 -17    0.29   16.30   1-0.78602-0.31586 0.23687-0.51413-0.57100-0.79743
  -4   0  17  -12.58   15.63   1 0.24430-0.23022-0.62667 0.12073 0.73999 0.96561
   4   0 -16 3574.16  138.57   1-0.79202-0.33959 0.20416-0.49790-0.57533-0.79797
  -4   0  16 3913.98   71.98   1 0.23085-0.22565-0.62078 0.07781 0.74922 0.97109
   4   0 -15    7.24   17.44   1-0.79710-0.36239 0.17138-0.48175-0.57900-0.79786
  -4   0  15   -7.14   13.15   1 0.21925-0.21922-0.61558 0.03420 0.75695 0.97507
   4   0 -14 1753.94   45.60   1-0.80129-0.38431 0.13844-0.46576-0.58202-0.79709
  -4   0  14 1800.53   48.82   1 0.20977-0.21068-0.61124-0.01026 0.76313 0.97750
   4   0 -13    1.98   15.36   1-0.80460-0.40534 0.10522-0.45006-0.58441-0.79570
  -4   0  13    5.93   11.04   1-0.56582-0.96677-0.71394-0.16021-0.41246-0.19919
  -4   0  13   -1.80   12.72   1 0.20271-0.19971-0.60796-0.05579 0.76764 0.97826
   4   0 -12  632.11   29.87   1-0.80702-0.42549 0.07155-0.43479-0.58616-0.79366
  -4   0  12  622.14   28.58   1-0.57651-0.95963-0.71404-0.20922-0.39721-0.18794
  -4   0  12  620.76   30.34   1 0.19847-0.18593-0.60597-0.10261 0.77032 0.97718
   4   0 -11   -3.10   11.19   1-0.80854-0.44473 0.03722-0.42019-0.58725-0.79097
  -4   0  11   -3.19    8.30   1-0.58361-0.94891-0.71397-0.25805-0.38683-0.18156
  -4   0  11  -18.29   13.06   1 0.19756-0.16882-0.60554-0.15099 0.77089 0.97401
   4   0 -10 1099.37   62.00   1-0.80910-0.46302 0.00192-0.40657-0.58766-0.78759
  -4   0  10 1012.14   56.79   1-0.58697-0.93445-0.71389-0.30688-0.38184-0.18058
  -4   0  10 1063.47   60.23   1 0.20062-0.14774-0.60698-0.20124 0.76896 0.96833
   4   0  -9   -2.39   10.03   1-0.80861-0.48025-0.03482-0.39439-0.58730-0.78345
  -4   0   9    5.63    9.54   1-0.58628-0.91594-0.71391-0.35580-0.38288-0.18561
  -4   0   9    5.60   10.74   1 0.20849-0.12184-0.61065-0.25371 0.76395 0.95957
   4   0  -8 4692.31  170.01   1-0.80686-0.49609-0.07419-0.38464-0.58605-0.77842
  -4   0   8 4728.61  174.79   1-0.58100-0.89284-0.71401-0.40480-0.39066-0.19740
  -4   0   8 4378.96  153.46   1 0.22224-0.09007-0.61693-0.30880 0.75498 0.94685
   4   0  -7   -1.87    6.72   1-0.80357-0.51053-0.11662-0.37815-0.58367-0.77224
  -4   0   7   -6.15    8.09   1-0.57037-0.86438-0.71401-0.45370-0.40603-0.21676
  -4   0   7    1.87   10.23   1 0.24323-0.05107-0.62620-0.36688 0.74074 0.92886
   4   0  -6  104.52   12.87   1-0.79802-0.52272-0.16474-0.37734-0.57966-0.76444
  -4   0   6   95.83   11.73   1-0.55331-0.82950-0.71352-0.50212-0.42980-0.24454
  -4   0   6  119.02   13.22   1 0.27315-0.00312-0.63875-0.42824 0.71929 0.90365
   4   0  -5   15.12    8.62   1-0.78867-0.53111-0.22306-0.38674-0.57291-0.75389
  -4   0   5    0.11    8.95   1-0.52806-0.78651-0.71175-0.54948-0.46318-0.28187
  -4   0   5    5.44    8.16   1 0.31401 0.05575-0.65457-0.49287 0.68769 0.86831
   4   0  -4  415.21   21.59   1-0.77125-0.53143-0.30194-0.41670-0.56034-0.73752
  -4   0   4  386.39   19.60   1-0.49367-0.73426-0.70757-0.59420-0.50559-0.32830
  -4   0   4  374.22   18.57   1 0.36776 0.12753-0.67289-0.55993 0.64183 0.81866
   4   0  -3    2.25    4.98   1-0.73010-0.50798-0.43054-0.49623-0.53063-0.70406
  -4   0   3    4.70    7.64   1-0.44783-0.67057-0.69920-0.63472-0.55728-0.38399
   4   0  -3    4.64    6.36   1-0.43416-0.21162 0.69615 0.63234-0.57172-0.74522
   4   0  -2 1548.27   59.16   1-0.58173-0.37737-0.69440-0.71117-0.42354-0.59314
  -4   0   2 1676.31   65.44   1-0.38872-0.59360-0.68435-0.66877-0.61689-0.44762
   4   0  -2 1646.43   60.67   1-0.51699-0.31254 0.71062 0.69560-0.47720-0.64688
  -4   0   1    4.01    7.64   1-0.01199-0.19840 0.99985 0.96799-0.01229 0.15369
  -4   0   1    3.82    8.78   1-0.31479-0.50172-0.66026-0.69383-0.68187-0.51659
   4   0  -1    5.21    6.76   1-0.60895-0.42258 0.71273 0.74650-0.34811-0.51396
  -4   0   0 7284.46  255.28   1-0.22677-0.39578-0.62464-0.70709-0.74725-0.58597
  -4   0  -1    4.45    6.02   1-0.72253-0.87357 0.44959 0.31993-0.52517-0.36675
  -4   0  -1    3.81    9.73   1-0.12605-0.27714-0.57569-0.70703-0.80789-0.65061
   4   0   1   -0.18    6.61   1-0.76812-0.61793 0.64025 0.77159 0.00721-0.15098
  -4   0  -2 3896.05  139.09   1-0.77259-0.90591 0.29668 0.11810-0.56131-0.40666
  -4   0  -2 4333.84  155.02   1-0.01569-0.14877-0.51283-0.69325-0.85834-0.70516
   4   0   2 4394.33  150.24   1-0.80466-0.67257 0.55841 0.73851 0.20171 0.04733
  -4   0  -3    1.54    7.02   1-0.79024-0.90589 0.21445-0.01312-0.57404-0.42330
  -4   0  -3    1.47    7.65   1 0.09799-0.01713-0.43834-0.66764-0.89344-0.74428
   4   0   3   11.81    6.12   1-0.80517-0.69114 0.45728 0.68612 0.37761 0.22705
  -4   0  -4  100.99   12.03   1-0.79741-0.89533 0.16920-0.10730-0.57922-0.43226
  -4   0  -4  110.17   11.76   1 0.21114 0.11383-0.35419-0.63248-0.91102-0.76616
   4   0   4  109.68   11.19   1-0.77735-0.68141 0.35054 0.62817 0.52234 0.37559
  -4   0  -5  -12.01   10.53   1-0.80046-0.88066 0.14556-0.17987-0.58143-0.43825
  -4   0  -5   -3.27   10.00   1 0.31739 0.23801-0.26528-0.59246-0.91043-0.76963
   4   0   5    1.72    8.17   1-0.73250-0.65456 0.24889 0.57518 0.63363 0.49061
  -4   0  -6 1256.54   53.74   1-0.80164-0.86412 0.13532-0.23904-0.58227-0.44289
   4   0   6 1192.58   48.63   1-0.67929-0.61942 0.15641 0.53146 0.71700 0.57779
  -4   0  -7   10.33    9.97   1-0.80180-0.84654 0.13392-0.28937-0.58239-0.44678
   4   0   7    2.07    6.03   1-0.48613-0.44067 0.09233 0.51580 0.86899 0.73468
   4   0   7   -0.37    7.07   1-0.62368-0.58175 0.07479 0.49863 0.77809 0.64259
  -4   0  -8 5146.35  181.86   1-0.80127-0.82829 0.13867-0.33355-0.58200-0.45019
   4   0   8 5120.27  181.57   1-0.56058-0.53291 0.00665 0.47898 0.82807 0.69755
   4   0   8 5075.10  177.69   1-0.56826-0.54438 0.00276 0.47537 0.82284 0.69112
  -4   0  -9    2.47   10.88   1-0.80019-0.80948 0.14786-0.37328-0.58122-0.45319
   4   0   9   -0.92    6.43   1-0.62392-0.61405-0.07513 0.44604 0.77786 0.65113
   4   0   9    6.30    8.08   1-0.51452-0.50870-0.06077 0.46061 0.85531 0.72736
  -4   0 -10   60.32   25.70   1-0.79860-0.79017 0.16040-0.40967-0.58008-0.45583
   4   0  10   87.11   10.19   1-0.67674-0.68466-0.15240 0.41763 0.72027 0.59733
   4   0  10  103.30   14.12   1-0.46285-0.47509-0.11729 0.45285 0.87863 0.75445
  -4   0 -11   -9.24   14.21   1-0.79651-0.77036 0.17552-0.44348-0.57857-0.45811
   4   0  11    4.53    7.84   1-0.71976-0.74548-0.22492 0.39397 0.65676 0.53762
   4   0  11   -7.60   11.10   1-0.41328-0.44357-0.16804 0.45087 0.89496 0.77456
  -4   0 -12 2196.96  107.43   1-0.79390-0.75002 0.19270-0.47523-0.57669-0.46001
   4   0  12 1961.99  105.29   1-0.75372-0.79716-0.29269 0.37514 0.58841 0.47307
   4   0  12 2273.47  111.87   1-0.36561-0.41396-0.21404 0.45364 0.90582 0.78920
  -4   0 -13   -0.23   17.03   1-0.79075-0.72914 0.21155-0.50531-0.57441-0.46151
   4   0  13   -1.63   11.84   1-0.31958-0.38599-0.25613 0.46033 0.91228 0.79943
  -4   0 -14 2031.02   86.82   1-0.78702-0.70769 0.23179-0.53400-0.57172-0.46261
   4   0  14 2132.48   97.20   1-0.27484-0.35903-0.29505 0.47078 0.91509 0.80588
  -4   0 -15   -6.44   12.07   1-0.78268-0.68562 0.25320-0.56152-0.56859-0.46326
   4   0  15   -4.27   12.26   1-0.23130-0.33351-0.33116 0.48348 0.91478 0.80932
  -4   0 -16  923.11   46.51   1-0.77769-0.66291 0.27563-0.58801-0.56499-0.46344
   4   0  16  826.92   41.02   1-0.18861-0.30885-0.36497 0.49849 0.91171 0.81000
   4   1 -17  142.20   23.25   1-0.74330-0.35035 0.39460-0.37743-0.54017-0.85720
   4  -1 -17  145.09   23.32   1-0.80599-0.25876 0.08746-0.64262-0.58542-0.72115
  -4  -1  17  133.33   21.39   1 0.32905-0.06865-0.65999 0.10881 0.67537 0.99168
  -4   1  17  168.41   18.67   1 0.17730-0.37404-0.59582 0.13018 0.78329 0.91822
   4   1 -16  280.35   23.87   1-0.75039-0.37516 0.37359-0.34951-0.54528-0.85854
   4  -1 -16  279.32   19.56   1-0.80830-0.27879 0.04456-0.63660-0.58708-0.71903
  -4  -1  16  232.11   22.94   1 0.31909-0.06058-0.65643 0.06356 0.68357 0.99613
  -4   1  16  237.73   19.49   1 0.16124-0.37208-0.58787 0.08932 0.79271 0.92389
   4   1 -15   45.88   14.33   1-0.75657-0.39906 0.35406-0.32010-0.54974-0.85922
   4  -1 -15   59.55   21.11   1-0.80910-0.29732 0.00043-0.63180-0.58766-0.71583
  -4  -1  15   52.05   14.05   1 0.31143-0.05022-0.65362 0.01756 0.68977 0.99858
  -4   1  15   45.43   13.71   1 0.14671-0.36859-0.58050 0.04788 0.80093 0.92835
   4   1 -14  122.09   15.26   1-0.76187-0.42209 0.33630-0.28893-0.55357-0.85927
   4  -1 -14  125.11   14.64   1-0.80827-0.31422-0.04526-0.62857-0.58706-0.71144
  -4  -1  14  100.77   19.71   1-0.65396-0.99587-0.70608-0.08290-0.27161 0.03677
  -4  -1  14  131.66   18.55   1 0.30637-0.03726-0.65173-0.02935 0.69381 0.99887
  -4   1  14  133.80   17.23   1 0.13394-0.36330-0.57388 0.00570 0.80790 0.93165
   4   1 -13   14.00   13.21   1-0.76628-0.44421 0.32069-0.25562-0.55675-0.85867
   4  -1 -13   11.67   14.61   1-0.80557-0.32908-0.09320-0.62738-0.58511-0.70575
  -4  -1  13   11.99   11.47   1-0.66602-0.99012-0.70311-0.12884-0.24906 0.05533
  -4  -1  13   11.67   16.39   1 0.30429-0.02132-0.65095-0.07738 0.69546 0.99677
  -4   1  13   10.89   11.87   1 0.12304-0.35617-0.56814-0.03735 0.81367 0.93367
   4   1 -12  797.65   47.10   1-0.76975-0.46541 0.30774-0.21963-0.55925-0.85740
   4  -1 -12  769.47   42.37   1-0.80072-0.34197-0.14340-0.62866-0.58161-0.69845
  -4  -1  12  852.56   47.89   1-0.67579-0.98206-0.70027-0.17489-0.23002 0.07036
  -4  -1  12  826.92   48.63   1 0.30566-0.00192-0.65146-0.12670 0.69437 0.99193
  -4   1  12  751.88   44.15   1 0.11439-0.34680-0.56351-0.08153 0.81814 0.93438
   4   1 -11  615.09   33.96   1-0.77220-0.48559 0.29822-0.18022-0.56103-0.85540
   4  -1 -11  658.05   35.70   1-0.79324-0.35223-0.19679-0.63313-0.57621-0.68925
  -4   1  11  487.37   45.54   1-0.38224-0.82464-0.68247-0.24739-0.62298-0.50868
  -4  -1  11  714.13   38.69   1-0.68333-0.97178-0.69778-0.22130-0.21482 0.08156
  -4  -1  11  629.56   34.94   1 0.31106 0.02149-0.65348-0.17753 0.69007 0.98388
  -4   1  11  652.23   35.40   1 0.10838-0.33480-0.56025-0.12709 0.82119 0.93367
   4   1 -10  602.49   27.17   1-0.77350-0.50448 0.29306-0.13634-0.56196-0.85258
   4  -1 -10  607.09   25.15   1-0.78245-0.35918-0.25426-0.64168-0.56842-0.67766
  -4   1  10  485.42   48.92   1-0.38036-0.80490-0.68192-0.29573-0.62474-0.51445
  -4  -1  10  600.59   25.66   1-0.68863-0.95926-0.69586-0.26829-0.20385 0.08853
  -4  -1  10  596.49   26.50   1 0.32120 0.04966-0.65719-0.23004 0.68185 0.97191
  -4   1  10  576.77   24.64   1 0.10551-0.31964-0.55869-0.17434 0.82263 0.93135
   4   1  -9  382.87   25.12   1-0.77323-0.52193 0.29416-0.08631-0.56176-0.84860
   4  -1  -9  370.80   22.85   1-0.76728-0.36174-0.31700-0.65549-0.55747-0.66291
  -4   1   9  339.55   24.08   1-0.37164-0.77833-0.67930-0.34201-0.63279-0.52652
  -4  -1   9  397.38   25.90   1-0.69158-0.94438-0.69473-0.31606-0.19764 0.09074
  -4  -1   9  367.56   23.50   1 0.33670 0.08321-0.66266-0.28422 0.66895 0.95513
  -4   1   9  337.36   22.54   1 0.10647-0.30067-0.55921-0.22367 0.82215 0.92712
   4   1  -8 2681.23   97.65   1-0.77068-0.53724 0.30416-0.02749-0.55993-0.84297
   4  -1  -8 2525.95   92.83   1-0.74603-0.35814-0.38668-0.67606-0.54213-0.64395
  -4   1   8 2317.04  140.83   1-0.35549-0.74432-0.67423-0.38583-0.64733-0.54507
  -4  -1   8 2614.31   99.30   1-0.69197-0.92695-0.69457-0.36481-0.19681 0.08756
  -4  -1   8 2710.64  101.14   1 0.35902 0.12355-0.67012-0.34048 0.64964 0.93209
  -4   1   8 2464.04   93.81   1 0.11214-0.27698-0.56229-0.27555 0.81929 0.92051
   4   1  -7   20.76    7.92   1-0.76454-0.54882 0.32694 0.04422-0.55549-0.83476
   4  -1  -7   21.23    7.97   1-0.71608-0.34595-0.46505-0.70551-0.52052-0.61851
  -4   1   7   14.66    7.67   1-0.33022-0.70144-0.66575-0.42670-0.66912-0.57087
  -4  -1   7   27.57    9.81   1-0.68943-0.90659-0.69556-0.41470-0.20218 0.07820
  -4  -1   7   25.48    8.09   1 0.38899 0.17154-0.67930-0.39848 0.62227 0.90099
  -4   1   7   16.60   10.64   1 0.12373-0.24737-0.56850-0.33058 0.81331 0.91078
   4   1  -6  253.84   17.77   1-0.75152-0.55353 0.37009 0.13630-0.54610-0.82159
   4  -1  -6  254.01   15.69   1-0.67304-0.32066-0.55447-0.74602-0.48945-0.58362
  -4   1   6  253.46   18.34   1-0.29710-0.65040-0.65367-0.46351-0.69602-0.60177
  -4  -1   6  266.55   17.77   1-0.68339-0.88273-0.69775-0.46580-0.21470 0.06168
  -4   1   6  221.59   17.75   1 0.14283-0.21027-0.57850-0.38939 0.80307 0.89674
   4   1  -6  257.86   16.23   1-0.42371-0.22373 0.69366 0.46211-0.58249-0.85813
   4   1  -5  391.73   22.47   1-0.72342-0.54314 0.44741 0.26255-0.52581-0.79753
   4  -1  -5  393.42   20.80   1-0.60969-0.27506-0.65679-0.79944-0.44372-0.53406
  -4   1   5  434.54   24.58   1-0.25445-0.58984-0.63659-0.49532-0.72800-0.63776
  -4  -1   5  412.12   23.07   1-0.67302-0.85454-0.70112-0.51806-0.23549 0.03688
  -4   1   5  434.47   24.41   1 0.17173-0.16334-0.59309-0.45278 0.78660 0.87652
   4   1  -5  417.38   21.66   1-0.47184-0.28994 0.70396 0.52120-0.53085-0.80266
   4   1  -4  138.44   11.99   1-0.65563-0.49323 0.58542 0.44933-0.47688-0.74485
   4  -1  -4  151.65   12.45   1-0.51460-0.19773-0.77102-0.86476-0.37509-0.46161
  -4   1   4  149.85   15.50   1-0.20202-0.51949-0.61339-0.52099-0.76350-0.67726
  -4  -1   4  139.15   13.09   1-0.65710-0.82079-0.70536-0.57121-0.26584 0.00254
  -4   1   4  158.82   15.73   1 0.21335-0.10370-0.61289-0.52139 0.76081 0.84698
   4   1  -4  139.71   11.84   1-0.52917-0.36537 0.71185 0.57788-0.46176-0.72975
  -4   1   3 2312.29   87.13   1 0.37227 0.07328 0.88946 0.93465 0.26508 0.34791
   4   1  -3 2185.42   78.56   1-0.46181-0.31722 0.82047 0.73337-0.33697-0.60126
  -4   1   3 2473.04  100.07   1-0.14015-0.43971-0.58304-0.53953-0.80025-0.71801
  -4  -1   3 2377.32   89.89   1-0.63391-0.77978-0.70983-0.62458-0.30705-0.04267
  -4   1   3 2460.75   95.77   1 0.27144-0.02759-0.63806-0.59537 0.72055 0.80297
   4   1  -3 2306.83   82.78   1-0.59377-0.44804 0.71366 0.62848-0.37164-0.63581
  -4   1   2  631.12   30.53   1 0.17242-0.10886 0.97758 0.97373 0.12082 0.19996
   4   1  -2  559.77   28.27   1 0.09645 0.22346 0.99314 0.95512 0.06598-0.19443
  -4   1   2  651.40   32.42   1-0.06936-0.35099-0.54458-0.55018-0.83583-0.75769
  -4  -1   2  652.03   31.09   1-0.60117-0.72922-0.71328-0.67694-0.36029-0.09990
  -4   1   2  585.86   30.30   1 0.35007 0.06905-0.66719-0.67326 0.65749 0.73616
   4   1  -2  623.23   28.13   1-0.66102-0.53339 0.70441 0.66802-0.25853-0.51888
  -4   1   1  706.36   33.92   1-0.06683-0.33036 0.99641 0.94356-0.05187 0.02352
  -4   1   1  780.63   37.84   1 0.00721-0.25645-0.49862-0.55310-0.86679-0.79265
  -4  -1   1  758.40   33.92   1-0.55596-0.66619-0.71363-0.72619-0.42617-0.16979
   4   1  -1  747.33   34.76   1-0.72355-0.61400 0.67899 0.69138-0.12423-0.38076
   4  -1  -1  742.65   32.57   1-0.45252-0.18933 0.70019 0.75533-0.55221-0.62738
  -4   1   0  101.37   11.68   1-0.29387-0.53962 0.93117 0.82949-0.21576-0.14399
  -4  -1   0  106.78    9.53   1-0.71692-0.80877-0.46308-0.52327-0.52112-0.26844
  -4   1   0  110.07   13.08   1 0.08773-0.15798-0.44548-0.54884-0.89098-0.82085
  -4  -1   0  114.28   12.21   1-0.49459-0.58694-0.70770-0.76935-0.50450-0.25216
   4   1   0  116.11   11.35   1-0.77272-0.68126 0.63428 0.69545 0.02419-0.22851
   4  -1   0  111.48   10.29   1-0.57429-0.32919 0.71404 0.81797-0.40040-0.47175
  -4   1  -1 1571.28   62.38   1-0.46673-0.69478 0.81621 0.66558-0.34053-0.27251
  -4  -1  -1 1571.75   60.64   1-0.75113-0.82523-0.37131-0.48041-0.54582-0.29696
  -4   1  -1 1613.90   67.26   1 0.16976-0.05806-0.38616-0.53836-0.90667-0.84070
  -4  -1  -1 1485.63   60.02   1-0.41431-0.48881-0.69130-0.80184-0.59197-0.34365
   4   1   1 1567.22   59.71   1-0.80183-0.72847 0.57120 0.68113 0.17547-0.07339
   4  -1   1 1575.29   61.06   1-0.69654-0.46952 0.69272 0.84543-0.18700-0.25452
  -4   1  -2 2292.05   86.64   1-0.58015-0.79047 0.69642 0.49685-0.42240-0.35816
  -4  -1  -2 2315.47   90.23   1-0.76836-0.82474-0.31298-0.47088-0.55825-0.31314
  -4   1  -2 2557.14   99.44   1 0.25026 0.04037-0.32262-0.52371-0.91284-0.85093
  -4  -1  -2 2454.56   98.81   1-0.31274-0.36912-0.65951-0.81904-0.68354-0.43922
   4   1   2 2430.70   86.62   1-0.80878-0.75351 0.49464 0.65335 0.31811 0.07306
   4  -1   2 2427.66   88.55   1-0.78412-0.57519 0.61647 0.81798 0.07148 0.00778
  -4   1  -3    1.61    6.80   1-0.64974-0.84244 0.59535 0.34693-0.47263-0.41222
  -4  -1  -3    5.71    7.22   1-0.77959-0.81823-0.26735-0.47417-0.56635-0.32504
  -4   1  -3   10.93   10.22   1 0.32733 0.13537-0.25643-0.50640-0.90944-0.85160
  -4  -1  -3   11.28    8.81   1-0.19000-0.22846-0.60773-0.81615-0.77107-0.53074
   4   1   3    4.29    8.62   1-0.79607-0.75886 0.41150 0.61896 0.44376 0.20252
   4  -1   3    9.07    6.12   1-0.80851-0.61769 0.48955 0.73981 0.32655 0.26667
  -4   1  -4 1493.83   59.39   1-0.69220-0.86717 0.51726 0.21988-0.50328-0.44683
  -4  -1  -4 1456.17   57.14   1-0.78774-0.80864-0.22804-0.48378-0.57224-0.33472
  -4  -1  -4 1638.48   69.97   1-0.04949-0.06994-0.53308-0.79054-0.84461-0.60839
   4   1   4 1472.77   57.18   1-0.76862-0.74950 0.32762 0.58386 0.54943 0.31200
   4  -1   4 1549.26   57.24   1-0.77438-0.60162 0.34246 0.64148 0.53202 0.47596
  -4   1  -5  397.36   23.29   1-0.71838-0.87562 0.45963 0.11331-0.52217-0.46950
  -4  -1  -5  469.19   24.89   1-0.79398-0.79715-0.19219-0.49685-0.57675-0.34303
  -4  -1  -5  288.72   47.89   1 0.09969 0.09719-0.43716-0.74350-0.89384-0.66163
   4  -1   5  416.03   20.42   1-0.45695-0.29946 0.12351 0.47002 0.88087 0.83029
   4  -1   5  443.72   22.23   1-0.70846-0.55368 0.20475 0.55244 0.67539 0.62308
   4   1   5  439.58   23.29   1-0.73175-0.73064 0.24744 0.55233 0.63506 0.40134
  -4   1  -6    6.16   10.21   1-0.73466-0.87418 0.41855 0.02331-0.53392-0.48503
  -4  -1  -6    0.91    8.20   1-0.79887-0.78429-0.15839-0.51198-0.58027-0.35036
  -4  -1  -6    1.50    6.89   1 0.24959 0.26487-0.32318-0.67867-0.91282-0.68501
   4  -1   6    9.86    7.58   1-0.51655-0.37686 0.05846 0.45383 0.85425 0.80747
   4  -1   6    2.30    6.66   1-0.63308-0.49628 0.08783 0.48430 0.76908 0.72052
   4   1   6    2.40    8.45   1-0.68927-0.70624 0.17242 0.52607 0.70368 0.47376
  -4   1  -7 5581.99  186.24   1-0.74478-0.86658 0.39032-0.05384-0.54123-0.49611
  -4  -1  -7 5650.27  185.62   1-0.80265-0.77034-0.12587-0.52838-0.58300-0.35689
  -4  -1  -7 3753.48 1395.13   1 0.38806 0.42056-0.20014-0.60485-0.89963-0.67622
   4  -1   7 5459.29  180.64   1-0.57005-0.44815-0.00497 0.43924 0.82159 0.77860
   4  -1   7 5678.26  177.97   1-0.55933-0.44059-0.00817 0.43707 0.82890 0.78412
   4   1   7 5532.37  181.25   1-0.64430-0.67918 0.10375 0.50619 0.75769 0.53148
  -4   1  -8  266.67   19.09   1-0.75091-0.85498 0.37200-0.12109-0.54565-0.50431
  -4  -1  -8  289.06   19.03   1-0.80549-0.75545-0.09419-0.54562-0.58506-0.36274
   4  -1   8  283.18   17.77   1-0.61752-0.51342-0.06640 0.42668 0.78374 0.74453
   4   1   8  277.92   16.72   1-0.48723-0.53600 0.09113 0.54269 0.86850 0.64666
   4  -1   8  289.88   17.46   1-0.49107-0.39039-0.08692 0.40709 0.86676 0.82575
   4   1   8  291.30   19.77   1-0.59824-0.65118 0.04078 0.49199 0.80027 0.57784
  -4   1  -9  902.76   52.75   1-0.75430-0.84066 0.36137-0.18065-0.54811-0.51054
  -4  -1  -9  918.81   50.93   1-0.80749-0.73970-0.06304-0.56340-0.58649-0.36798
   4  -1   9  905.58   50.75   1-0.65919-0.57288-0.12557 0.41636 0.74141 0.70599
   4   1   9  795.70   49.65   1-0.58869-0.65526-0.02845 0.47197 0.80785 0.58980
   4  -1   9  894.46   50.73   1-0.42868-0.34605-0.15261 0.39017 0.89047 0.85323
   4   1   9  970.43   55.21   1-0.55224-0.62324-0.01674 0.48322 0.83351 0.61486
  -4   1 -10  887.46   33.31   1-0.75573-0.82436 0.35679-0.23416-0.54914-0.51534
  -4  -1 -10  865.44   34.19   1-0.80867-0.72318-0.03246-0.58164-0.58735-0.37241
   4  -1  10  829.18   29.39   1-0.69532-0.62681-0.18237 0.40842 0.69517 0.66355
   4  -1  10  841.93   28.69   1-0.37146-0.30689-0.20853 0.38302 0.90472 0.87126
   4   1  10  924.43   34.23   1-0.50684-0.59589-0.06943 0.47931 0.85923 0.64433
  -4   1 -11  310.59   21.33   1-0.75566-0.80656 0.35703-0.28286-0.54908-0.51907
  -4  -1 -11  308.73   19.74   1-0.80910-0.70588-0.00186-0.59997-0.58766-0.37651
   4  -1  11  302.70   18.31   1-0.72616-0.67544-0.23678 0.40286 0.64546 0.61763
   4  -1  11  307.14   17.33   1-0.31848-0.27197-0.25712 0.38321 0.91239 0.88271
   4   1  11  310.85   19.49   1-0.46222-0.56932-0.11797 0.47954 0.87888 0.66776
  -4   1 -12   51.03   15.85   1-0.75437-0.78755 0.36117-0.32765-0.54815-0.52191
  -4  -1 -12   59.85   13.15   1-0.80877-0.68782 0.02860-0.61842-0.58742-0.38005
   4  -1  12   44.64   12.73   1-0.75195-0.71903-0.28881 0.39969 0.59257 0.56853
   4  -1  12   54.72   10.93   1-0.26874-0.24008-0.30022 0.38938 0.91522 0.88923
   4   1  12   57.01   15.46   1-0.41844-0.54360-0.16290 0.48338 0.89351 0.68617
  -4   1 -13 1730.92   78.17   1-0.75204-0.76750 0.36850-0.36925-0.54647-0.52401
  -4  -1 -13 1801.94   80.92   1-0.80769-0.66902 0.05903-0.63692-0.58664-0.38306
   4  -1  13 1500.29   73.86   1-0.77282-0.75754-0.33836 0.39906 0.53688 0.51659
   4  -1  13 1682.49   80.10   1-0.22172-0.21109-0.33888 0.39952 0.91432 0.89208
   4   1  13 1550.88   71.26   1-0.37548-0.51870-0.20472 0.49033 0.90393 0.70037
  -4   1 -14   47.50   13.87   1-0.74878-0.74651 0.37848-0.40820-0.54412-0.52543
  -4  -1 -14   55.55   19.51   1-0.80585-0.64945 0.08946-0.65542-0.58531-0.38551
   4  -1  14   30.36   13.90   1-0.17668-0.18408-0.37414 0.41307 0.91038 0.89189
   4   1  14   36.93   13.78   1-0.33325-0.49452-0.24386 0.49996 0.91075 0.71096
  -4   1 -15  591.13   33.48   1-0.74465-0.72466 0.39071-0.44490-0.54114-0.52622
  -4  -1 -15  589.01   31.63   1-0.80325-0.62912 0.11995-0.67387-0.58343-0.38742
   4   1  15  574.01   32.07   1-0.29155-0.47057-0.28074 0.51253 0.91442 0.71824
  -4   1 -16    5.14   19.51   1-0.73968-0.70197 0.40484-0.47970-0.53755-0.52641
  -4  -1 -16   12.93   16.38   1-0.79986-0.60801 0.15052-0.69222-0.58099-0.38876
   4   1  16   -0.69   19.59   1-0.25041-0.44745-0.31551 0.52656 0.91527 0.72285
   4   2 -16  552.51   32.68   1-0.68210-0.38423 0.53733-0.20697-0.49599-0.89973
   4  -2 -16  583.00   33.90   1-0.80554-0.19881-0.09365-0.75372-0.58509-0.62639
  -4   2  16  589.91   32.49   1 0.11016-0.49995-0.56122 0.09460 0.82029 0.86086
   4   2 -15 1889.73  119.19   1-0.68602-0.40562 0.52966-0.16544-0.49882-0.89894
   4  -2 -15 1746.09  108.46   1-0.80050-0.21152-0.14525-0.75640-0.58145-0.61896
  -4  -2  15 1679.60  112.99   1-0.69440-0.97728-0.69360-0.00096-0.19160 0.21190
  -4   2  15 1768.97  108.40   1 0.09372-0.49837-0.55221 0.05480 0.82841 0.86523
   4   2 -15 1749.01  122.53   1-0.41543-0.12949 0.69159-0.00041-0.59086-0.99158
   4   2 -14  553.13   37.19   1-0.68827-0.42559 0.52519-0.12098-0.50044-0.89679
   4  -2 -14  513.64   32.50   1-0.79292-0.22167-0.19878-0.76101-0.57598-0.60968
  -4  -2  14  583.42   40.68   1-0.70699-0.97126-0.68800-0.04399-0.16373 0.23391
  -4   2  14  488.50   32.58   1 0.07872-0.49535-0.54380 0.01440 0.83551 0.86857
   4   2 -14  495.33   36.12   1-0.41530-0.14744 0.69155 0.04834-0.59099-0.98788
   4   2 -13 1184.92   36.85   1-0.68860-0.44364 0.52454-0.07270-0.50068-0.89324
   4  -2 -13 1093.92   31.72   1-0.78238-0.22887-0.25459-0.76790-0.56837-0.59828
  -4  -2  13 1127.12   34.52   1-0.71688-0.96342-0.68287-0.08778-0.14058 0.25319
  -4   2  13 1046.29   31.52   1 0.06532-0.49073-0.53614-0.02674 0.84159 0.87089
   4   2 -13 1201.16   36.81   1-0.41858-0.16881 0.69238 0.09795-0.58769-0.98076
   4   2 -12  235.13   19.40   1-0.68659-0.45936 0.52853-0.01978-0.49923-0.88802
   4  -2 -12  200.83   18.19   1-0.76834-0.23257-0.31308-0.77746-0.55823-0.58434
  -4  -2  12  200.44   15.05   1-0.72509-0.95392-0.67804-0.13186-0.12036 0.26953
  -4   2  12  195.96   17.54   1 0.05375-0.48428-0.52942-0.06883 0.84665 0.87220
   4   2 -12  201.56   17.33   1-0.42573-0.19405 0.69415 0.14851-0.58043-0.96968
   4   2 -11 2003.80   59.25   1-0.68161-0.47234 0.53827 0.03865-0.49563-0.88056
   4  -2 -11 1936.05   58.57   1-0.75001-0.23186-0.37475-0.79000-0.54501-0.56757
  -4  -2  11 2000.96   64.82   1-0.73172-0.94283-0.67372-0.17645-0.10330 0.28271
  -4   2  11 1877.64   62.54   1 0.04432-0.47569-0.52386-0.11209 0.85064 0.87243
   4   2 -11 1958.84   62.12   1-0.43725-0.22366 0.69686 0.20000-0.56849-0.95392
   4   2 -10 1914.23   89.93   1-0.67272-0.48117 0.55506 0.10438-0.48922-0.87038
   4  -2 -10 1875.16   88.12   1-0.72644-0.22604-0.43987-0.80621-0.52799-0.54673
  -4  -2  10 1814.08   83.04   1-0.73682-0.93021-0.67010-0.22175-0.08968 0.29245
  -4   2  10 1647.17   77.61   1 0.03740-0.46459-0.51975-0.15678 0.85349 0.87153
   4   2 -10 1787.85   83.49   1-0.45370-0.25819 0.70043 0.25237-0.55093-0.93254
   4   2  -9 5769.37  283.76   1-0.65837-0.48454 0.58071 0.17896-0.47886-0.85626
   4  -2  -9 5378.52  264.40   1-0.69626-0.21361-0.50888-0.82631-0.50621-0.52112
  -4   2   9 4091.09  390.18   1-0.01649-0.50052-0.51333-0.19749-0.85803-0.84289
  -4  -2   9 5129.26  260.25   1-0.74038-0.91605-0.66741-0.26797-0.07988 0.29838
  -4   2   9 5156.80  262.04   1 0.03352-0.45045-0.51742-0.20327 0.85507 0.86935
   4   2  -9 5430.56  272.99   1-0.47563-0.29821 0.70463 0.30535-0.52655-0.90433
   4   2  -8 4647.89  208.47   1-0.63609-0.47997 0.61742 0.26462-0.46278-0.83641
   4  -2  -8 4429.35  191.65   1-0.65766-0.19276-0.58194-0.85046-0.47834-0.48943
  -4   2   8 4051.15  341.46   1 0.00122-0.46485-0.50238-0.23541-0.86464-0.85351
  -4  -2   8 4681.21  204.74   1-0.74235-0.90030-0.66587-0.31534-0.07436 0.30002
  -4   2   8 4476.86  199.50   1 0.03337-0.43258-0.51733-0.25198 0.85513 0.86566
   4   2  -8 4736.80  204.38   1-0.50349-0.34416 0.70896 0.35846-0.49382-0.86778
   4   2  -7 9660.43  326.16   1-0.60189-0.46349 0.66767 0.36381-0.43809-0.80796
   4  -2  -7 9419.27  320.76   1-0.60829-0.16115-0.65876-0.87837-0.44271-0.44997
  -4   2   7 9159.65  463.53   1 0.02667-0.42144-0.48623-0.26815-0.87342-0.86630
  -4  -2   7 9558.85  315.85   1-0.74258-0.88281-0.66568-0.36407-0.07370 0.29680
  -4   2   7 9265.83  314.47   1 0.03787-0.41006-0.52003-0.30349 0.85330 0.86008
   4   2  -7 9748.79  332.44   1-0.53750-0.39625 0.71255 0.41084-0.45094-0.82108
   4   2  -6 1854.07   65.61   1-0.54904-0.42846 0.73389 0.47900-0.39994-0.76614
   4  -2  -6 1808.24   61.13   1-0.54527-0.11588-0.73816-0.90886-0.39722-0.40066
  -4   2   6 2021.63   82.74   1 0.05909-0.37106-0.46495-0.29574-0.88336-0.88024
  -4  -2   6 1795.85   66.96   1-0.74083-0.86333-0.66707-0.41437-0.07864 0.28799
  -4   2   6 1961.07   70.53   1 0.04834-0.38157-0.52624-0.35851 0.84895 0.85197
   4   2  -6 1880.55   64.27   1-0.57738-0.45422 0.71403 0.46111-0.39594-0.76226
   4  -2  -5 9678.78  299.54   1-0.46536-0.05372-0.81740-0.93919-0.33954-0.33915
  -4   2   5 8366.87  660.15   1 0.09756-0.31463-0.43864-0.31832-0.89334-0.89424
  -4  -2   5 9974.34  299.68   1-0.73668-0.84147-0.67021-0.46642-0.09005 0.27270
  -4   2   5 9925.55  312.68   1 0.06661-0.34528-0.53688-0.41797 0.84101 0.84028
   4   2  -5 9860.30  314.03   1-0.62203-0.51696 0.71144 0.50730-0.32698-0.68948
  -4   2   4 4756.95  169.73   1 0.36699-0.02683 0.89277 0.96598 0.26127 0.25721
   4   2  -4 4823.94  171.76   1-0.34631-0.26115 0.90318 0.74628-0.25360-0.61225
  -4   2   4 4381.14  292.64   1 0.14099-0.25325-0.40757-0.33613-0.90222-0.90712
  -4  -2   4 4813.17  164.81   1-0.72952-0.81659-0.67520-0.52033-0.10903 0.24984
  -4   2   4 5436.20  188.23   1 0.09532-0.29855-0.55309-0.48298 0.82764 0.82315
   4   2  -4 4825.23  163.65   1-0.66922-0.58223 0.70223 0.54688-0.24292-0.60159
  -4   2   3 9891.12  326.44   1 0.24674-0.12936 0.95324 0.97749 0.17447 0.16665
  -4   2   310017.01  346.08   1 0.18781-0.18845-0.37239-0.34960-0.90887-0.91774
  -4  -2   3 9567.22  323.99   1-0.71841-0.78776-0.68201-0.57605-0.13687 0.21813
  -4   2   3 9820.49  332.59   1 0.13827-0.23759-0.57614-0.55486 0.80556 0.79729
   4   2  -3 9711.21  327.21   1-0.71541-0.64651 0.68368 0.57711-0.14409-0.49894
  -4   2   2 6064.05  205.40   1 0.10929-0.24912 0.99115 0.96637 0.07525 0.06375
   4   2  -2 6137.26  209.76   1 0.03422 0.08410 0.99919 0.94023 0.02107-0.32999
  -4   2   2 4770.70  302.45   1 0.23755-0.12079-0.33303-0.35913-0.91250-0.92543
  -4  -2   2 5788.30  201.65   1-0.70217-0.75336-0.69026-0.63336-0.17461 0.17688
  -4   2   2 6007.93  204.70   1 0.20106-0.15678-0.60719-0.63471 0.76869 0.75667
   4   2  -2 6038.14  201.87   1-0.75616-0.70535 0.65354 0.59577-0.03306-0.38409
  -4   2   0 7722.20  259.65   1-0.17756-0.50048 0.97524 0.85250-0.13180-0.15084
  -4  -2   0 7902.51  273.18   1-0.64484-0.66039-0.70796-0.74887-0.28803 0.05546
   4   2   0 7932.66  269.03   1-0.80492-0.79029 0.55702 0.59678 0.20450-0.13887
   4  -2   0 7736.28  265.29   1-0.42043-0.09851 0.69285 0.81815-0.58582-0.56649
  -4   2  -2 1270.67   52.60   1-0.40616-0.69361 0.86425 0.64376-0.29681-0.32320
  -4  -2  -2 1291.29   49.67   1-0.59751-0.57685-0.67365-0.81080-0.43493-0.09917
  -4  -2  -2 1359.07   56.02   1-0.53061-0.51042-0.71198-0.85085-0.45991-0.12450
   4  -2   2 1195.32   47.52   1-0.43393-0.14661 0.14728 0.36798 0.88882 0.91819
   4   2   2 1339.88   51.53   1-0.79963-0.82115 0.42681 0.56409 0.42239 0.08664
   4  -2   2 1342.03   52.27   1-0.74313-0.45738 0.66524 0.88812-0.07214-0.04516
  -4   2  -3 7792.30  265.50   1-0.48660-0.75639 0.79830 0.52881-0.35487-0.38499
  -4  -2  -3 7772.73  285.62   1-0.65324-0.61483-0.58948-0.77553-0.47516-0.14322
  -4  -2  -3 8612.42  292.50   1-0.43985-0.40181-0.69745-0.88521-0.56576-0.23437
   4  -2   3 8309.30  293.11   1-0.47899-0.20947 0.10007 0.36963 0.87209 0.90525
   4   2   3 8575.61  277.33   1-0.77982-0.81942 0.35746 0.54353 0.51390 0.18197
  -4   2  -4 1499.82   53.78   1-0.54700-0.79906 0.73620 0.41778-0.39847-0.43237
  -4  -2  -4 1454.74   54.28   1-0.69290-0.63674-0.51583-0.75079-0.50378-0.17567
   4  -2   4 1548.39   54.96   1-0.52161-0.26989 0.05268 0.37110 0.85155 0.88850
   4  -2   4 1372.88   49.45   1-0.72636-0.47668 0.23717 0.55750 0.64509 0.67967
   4   2   4 1511.69   53.34   1-0.75216-0.80981 0.28927 0.52399 0.59208 0.26385
  -4   2  -5 4402.23  150.62   1-0.59127-0.82569 0.68199 0.31473-0.43043-0.46815
  -4  -2  -5 4705.37  157.12   1-0.72205-0.64814-0.45076-0.73463-0.52482-0.20054
  -4  -2  -5 3228.38  380.13   1-0.16743-0.09327-0.59680-0.88230-0.78472-0.46135
   4  -2   5 4517.94  148.94   1-0.56154-0.32761 0.00547 0.37275 0.82742 0.86817
   4  -2   5 4065.13  140.75   1-0.58483-0.35316 0.02353 0.39263 0.81080 0.84918
   4   2   5 4616.07  147.18   1-0.71900-0.79473 0.22354 0.50702 0.65807 0.33364
  -4   2  -6 2591.13   92.08   1-0.62363-0.84033 0.63652 0.22032-0.45378-0.49527
  -4  -2  -6 2569.61   94.68   1-0.74408-0.65241-0.39235-0.72514-0.54073-0.22026
   4  -2   6 2589.38   93.85   1-0.59861-0.38248-0.04127 0.37485 0.79996 0.84450
   4  -2   6 2350.08   91.56   1-0.46209-0.24849-0.11810 0.29978 0.87892 0.92107
   4   2   6 2727.00   94.67   1-0.68237-0.77618 0.16130 0.49355 0.71298 0.39236
  -4   2  -7 7252.95  261.31   1-0.64699-0.84597 0.59990 0.13476-0.47065-0.51590
  -4  -2  -7 7856.57  268.23   1-0.76107-0.65165-0.33905-0.72074-0.55299-0.23635
  -4  -2  -7 1282.49 1200.85   1 0.21847 0.32841-0.34837-0.73217-0.91153-0.59671
   4  -2   7 7703.30  252.74   1-0.63275-0.43441-0.08736 0.37761 0.76940 0.81773
   4  -2   7 6653.78  237.72   1-0.36869-0.17314-0.21115 0.25550 0.90525 0.95117
   4   2   7 7482.89  254.62   1-0.64388-0.75558 0.10315 0.48418 0.75813 0.44119
  -4   2  -8  330.31   25.95   1-0.66370-0.84497 0.57138 0.05730-0.48271-0.53173
  -4  -2  -8  349.50   26.16   1-0.77433-0.64726-0.28971-0.72027-0.56256-0.24951
   4  -2   8  342.02   23.75   1-0.66391-0.48337-0.13265 0.38118 0.73595 0.78806
   4  -2   8  301.68   22.30   1-0.29570-0.11815-0.27714 0.23859 0.91419 0.96390
   4   2   8  345.71   24.30   1-0.60416-0.73391 0.04854 0.47835 0.79537 0.48222
  -4   2  -9 2681.84   66.49   1-0.67545-0.83899 0.54998-0.01302-0.49119-0.54397
  -4  -2  -9 2766.20   78.42   1-0.78473-0.63992-0.24334-0.72281-0.57007-0.26082
   4  -2   9 2751.63   70.08   1-0.69208-0.52933-0.17702 0.38567 0.69977 0.75568
   4  -2   9 2396.93   67.55   1-0.23607-0.07654-0.32729 0.23726 0.91495 0.96842
   4   2   9 2729.85   72.22   1-0.56399-0.71180-0.00248 0.47608 0.82577 0.51640
  -4   2 -10    3.50   10.17   1-0.68337-0.82910 0.53486-0.07703-0.49690-0.55375
  -4  -2 -10    4.01   10.29   1-0.79283-0.63029-0.19932-0.72772-0.57591-0.27046
   4  -2  10    4.80    8.82   1-0.71727-0.57232-0.22038 0.39116 0.66102 0.72071
   4  -2  10    1.50    7.07   1-0.18454-0.04304-0.36811 0.24525 0.91128 0.96850
   4   2  10   -0.62   10.08   1-0.52374-0.68961-0.05024 0.47709 0.85039 0.54480
  -4   2 -11  685.84   40.37   1-0.68843-0.81644 0.52487-0.13595-0.50056-0.56118
  -4  -2 -11  719.55   42.69   1-0.79903-0.61874-0.15715-0.73447-0.58039-0.27874
   4  -2  11  685.50   39.92   1-0.73948-0.61233-0.26270 0.39770 0.61979 0.68328
   4   2  11  752.29   42.71   1-0.48366-0.66757-0.09501 0.48109 0.87008 0.56823
  -4   2 -12  692.12   37.06   1-0.69116-0.80145 0.51936-0.19039-0.50253-0.56693
  -4  -2 -12  670.79   35.63   1-0.80359-0.60557-0.11644-0.74268-0.58368-0.28583
   4  -2  12  667.50   35.53   1-0.75861-0.64905-0.30369 0.40561 0.57642 0.64358
   4   2  12  739.18   39.79   1-0.44378-0.64575-0.13719 0.48768 0.88556 0.58750
  -4   2 -13  798.41   31.68   1-0.69199-0.78455 0.51769-0.24099-0.50313-0.57130
  -4  -2 -13  761.64   26.91   1-0.80670-0.59094-0.07688-0.75205-0.58593-0.29187
   4  -2  13  821.24   29.31   1-0.77487-0.68309-0.34380 0.41436 0.53043 0.60139
   4   2  13  856.68   32.07   1-0.40418-0.62420-0.17702 0.49662 0.89738 0.60310
  -4   2 -14   97.85   15.93   1-0.69119-0.76603 0.51930-0.28831-0.50255-0.57450
  -4  -2 -14  106.27   17.75   1-0.80850-0.57504-0.03841-0.76240-0.58723-0.29674
   4  -2  14   91.46   15.71   1-0.78810-0.71410-0.38276 0.42427 0.48205 0.55681
   4   2  14  103.26   21.86   1-0.36483-0.60291-0.21477 0.50764 0.90596 0.61545
  -4   2 -15  839.23   39.29   1-0.68899-0.74610 0.52376-0.33278-0.50096-0.57669
  -4  -2 -15  869.78   42.55   1-0.80910-0.55791-0.00048-0.77340-0.58766-0.30096
   4   2  15  954.85   44.37   1-0.32570-0.58183-0.25066 0.52052 0.91163 0.62491
  -4   2 -16   -1.83   17.27   1-0.68551-0.72490 0.53067-0.37480-0.49845-0.57795
  -4  -2 -16   -5.45   21.06   1-0.80855-0.53964 0.03688-0.78495-0.58726-0.30434
   4   2  16  -10.47   21.14   1-0.28666-0.56050-0.28495 0.53574 0.91466 0.63151
   4   3 -15  378.04   30.31   1-0.59117-0.38818 0.68213-0.03420-0.43035-0.92094
   4  -3 -15  416.75   28.86   1-0.78132-0.11532-0.25950-0.84976-0.56761-0.51438
  -4  -3  15  402.61   27.79   1-0.72361-0.92892-0.67896 0.03450-0.12408 0.36865
  -4   3  15  414.95   31.47   1 0.05886-0.61006-0.53240 0.05321 0.84443 0.79056
   4   3 -14    3.23   13.20   1-0.58820-0.40293 0.68604 0.01863-0.42821-0.91503
   4  -3 -14   17.00   15.77   1-0.76754-0.11927-0.31605-0.85740-0.55766-0.50063
  -4  -3  14    6.33   19.93   1-0.73330-0.92089-0.67263-0.00808-0.09913 0.38971
  -4   3  14    2.01   16.69   1 0.04273-0.60818-0.52292 0.01389 0.85130 0.79367
   4   3 -13  982.25   57.94   1-0.58211-0.41457 0.69391 0.07544-0.42381-0.90688
   4  -3 -13  994.91   57.74   1-0.75015-0.11948-0.37433-0.86654-0.54511-0.48459
  -4  -3  13  915.54   52.00   1-0.74154-0.91141-0.66651-0.05087-0.07664 0.40833
  -4   3  13  904.90   53.56   1 0.02800-0.60488-0.51409-0.02609 0.85727 0.79588
   4   3 -13  933.98   54.43   1-0.54680-0.37385 0.71318 0.09737-0.43860-0.92236
   4   3 -12   20.72   17.42   1-0.57209-0.42232 0.70651 0.13700-0.41658-0.89603
   4  -3 -12   28.68   12.47   1-0.72865-0.11573-0.43428-0.87758-0.52959-0.46524
  -4  -3  12   34.60   12.54   1-0.74844-0.90059-0.66077-0.09404-0.05673 0.42436
  -4   3  12   47.16   19.01   1 0.01488-0.59998-0.50609-0.06689 0.86235 0.79720
   4   3 -12   44.10   12.84   1-0.55800-0.40314 0.71371 0.14669-0.42337-0.90330
   4   3 -11   71.74   12.59   1-0.55758-0.42554 0.72400 0.20343-0.40610-0.88177
   4  -3 -11   64.56   11.35   1-0.70234-0.10718-0.49598-0.89037-0.51060-0.44243
  -4  -3  11   49.55   13.29   1-0.75409-0.88852-0.65557-0.13776-0.03957 0.43765
  -4   3  11   85.60   14.92   1 0.00359-0.59325-0.49909-0.10871 0.86653 0.79764
   4   3 -11   76.40   13.87   1-0.57311-0.43634 0.71403 0.19580-0.40210-0.87821
   4   3 -10   40.28   12.26   1-0.53719-0.42288 0.74715 0.27552-0.39139-0.86328
   4  -3 -10   29.82   14.39   1-0.67041-0.09300-0.55931-0.90479-0.48755-0.41556
  -4  -3  10   30.43   10.82   1-0.75856-0.87528-0.65110-0.18220-0.02537 0.44797
  -4   3  10   34.32   13.12   1-0.00555-0.58438-0.49336-0.15178 0.86980 0.79715
   4   3 -10   33.30   12.46   1-0.59227-0.47359 0.71372 0.24428-0.37390-0.84619
   4   3  -9  271.77   18.96   1-0.50930-0.41273 0.77638 0.35369-0.37126-0.83937
   4  -3  -9  263.27   15.60   1-0.63190-0.07224-0.62395-0.92052-0.45975-0.38394
  -4  -3   9  249.71   17.51   1-0.76189-0.86088-0.64754-0.22755-0.01440 0.45506
  -4   3   9  234.65   19.18   1-0.01215-0.57297-0.48917-0.19641 0.87210 0.79569
   4   3  -9  246.60   17.09   1-0.61544-0.51484 0.71215 0.29149-0.33774-0.80620
   4   3  -8  103.43   14.30   1-0.47182-0.39297 0.81173 0.43797-0.34420-0.80854
   4  -3  -8   98.50   11.34   1-0.58573-0.04383-0.68925-0.93691-0.42642-0.34678
  -4  -3   8   93.89   15.44   1-0.76407-0.84535-0.64509-0.27401-0.00701 0.45857
  -4   3   8  106.65   15.17   1-0.01568-0.55847-0.48693-0.24297 0.87329 0.79313
   4   3  -8   88.20   11.77   1-0.64226-0.55975 0.70844 0.33656-0.29258-0.75722
   4   3  -7  360.16   24.32   1-0.42198-0.36079 0.85259 0.52795-0.30823-0.76882
   4  -3  -7  355.41   25.04   1-0.53077-0.00662-0.75412-0.95287-0.38675-0.30329
  -4   3   7  232.82   55.29   1 0.36779-0.15693-0.21937-0.02160-0.90366-0.98737
  -4  -3   7  343.91   24.95   1-0.76505-0.82861-0.64395-0.32179-0.00362 0.45809
  -4   3   7  365.83   26.97   1-0.01539-0.54016-0.48711-0.29196 0.87320 0.78928
   4   3  -7  357.24   24.34   1-0.67197-0.60755 0.70143 0.37834-0.23755-0.69837
   4   3  -6  164.04   15.63   1-0.35725-0.31379 0.89665 0.62093-0.26150-0.71830
   4  -3  -6  178.91   15.96   1-0.46599 0.04040-0.81685-0.96669-0.33999-0.25270
  -4   3   6  180.34   23.50   1 0.37722-0.12956-0.21048-0.06160-0.90188-0.98965
  -4  -3   6  181.74   17.25   1-0.76472-0.81056-0.64433-0.37109-0.00476 0.45307
  -4   3   6  174.25   17.22   1-0.01028-0.51703-0.49036-0.34402 0.87145 0.78378
   4   3  -6  177.41   14.24   1-0.70327-0.65694 0.68975 0.41545-0.17214-0.62914
  -4   3   5 2294.65   87.08   1 0.39264-0.09602 0.87609 0.97729 0.27979 0.18885
   4   3  -5 2178.17   81.53   1-0.27504-0.24932 0.93993 0.71315-0.20216-0.65516
  -4   3   5 2635.42  168.79   1 0.39160-0.09701-0.19675-0.09581-0.89885-0.99066
  -4  -3   5 2053.18   73.77   1-0.76288-0.79099-0.64644-0.42211-0.01108 0.44287
  -4   3   5 2368.47   90.11   1 0.00109-0.48763-0.49753-0.40000 0.86744 0.77601
   4   3  -5 2269.12   85.38   1-0.73426-0.70601 0.67195 0.44644-0.09657-0.54975
  -4   3   4   13.99   11.96   1 0.30688-0.16407 0.92647 0.97872 0.21788 0.12317
   4   3  -4   24.23    9.27   1-0.17428-0.16607 0.97615 0.79840-0.12943-0.57876
  -4  -3   4   15.07   11.44   1-0.75918-0.76958-0.65045-0.47504-0.02337 0.42671
   4  -3  -4   20.97    8.24   1-0.41629 0.05422 0.16504 0.11336 0.89412 0.99207
  -4   3   4   19.44   11.15   1 0.02083-0.44988-0.50973-0.46101 0.86008 0.76490
   4   3  -4   12.82    9.89   1-0.76258-0.75242 0.64677 0.47004-0.01206-0.46142
  -4   3   3  899.57   38.93   1 0.21190-0.24132 0.96581 0.96911 0.14932 0.05086
   4   3  -3 1039.44   41.28   1-0.05813-0.06767 0.99726 0.86845-0.04559-0.49112
  -4  -3   3  985.78   37.76   1-0.75311-0.74579-0.65650-0.53000-0.04261 0.40359
   4  -3  -3  954.67   37.31   1-0.43646 0.01627 0.14471 0.14188 0.88800 0.98974
  -4   3   3 1047.45   44.46   1 0.05207-0.40062-0.52843-0.52852 0.84737 0.74843
   4   3  -3 1012.54   41.69   1-0.78574-0.79366 0.61348 0.48554 0.07901-0.36651
  -4   3   2  264.95   18.30   1 0.11030-0.32524 0.99098 0.94526 0.07598-0.02615
   4   3  -2  251.23   16.47   1 0.06668 0.03942 0.99678 0.91688 0.04449-0.39720
  -4  -3   2  236.17   17.40   1-0.74389-0.71885-0.66462-0.58703-0.06998 0.37234
   4  -3  -2  249.13   15.16   1-0.45907-0.02414 0.12128 0.16731 0.88007 0.98560
  -4   3   2  256.53   17.86   1 0.09968-0.33498-0.55550-0.60440 0.82551 0.72282
   4   3  -2  254.51   17.19   1-0.80157-0.82757 0.57222 0.49304 0.17331-0.26838
   4   3  -1  286.05   17.97   1 0.19072 0.14572 0.97245 0.94149 0.13403-0.30388
  -4   3   1  275.03   19.45   1 0.00625-0.41155 0.99997 0.90531 0.00088-0.10504
  -4  -3   1  277.46   16.87   1-0.73035-0.68759-0.67465-0.64597-0.10689 0.33155
   4  -3  -1  280.15   17.28   1-0.48341-0.06627 0.09528 0.19017 0.87019 0.97951
  -4   3   1  294.14   18.86   1 0.17142-0.24522-0.59293-0.69066 0.78679 0.68032
   4   3  -1  282.05   17.88   1-0.80872-0.85282 0.52394 0.49354 0.26728-0.17059
   4   3   0 2701.39   94.04   1 0.30457 0.24190 0.92762 0.94550 0.21621-0.21793
  -4   3   0 2803.96   96.78   1-0.09574-0.49580 0.99274 0.84906-0.07274-0.18240
  -4  -3   0 2599.51   89.91   1-0.71078-0.65030-0.68611-0.70635-0.15499 0.27957
   4  -3   0 2664.32   92.69   1-0.50883-0.10949 0.06719 0.21094 0.85823 0.97134
  -4   3   0 2609.12   94.20   1 0.27976-0.11885-0.64142-0.78796 0.71435 0.60414
   4   3   0 2674.50   88.52   1-0.80686-0.86905 0.47036 0.48874 0.35739-0.07666
  -4   3  -1   15.63   13.20   1-0.19091-0.57322 0.97136 0.77873-0.14144-0.25491
  -4  -3  -1   16.73    8.66   1-0.68334-0.60422-0.69777-0.76703-0.21480 0.21581
   4  -3   1   18.46    7.01   1-0.53481-0.15326 0.03741 0.23001 0.84414 0.96104
   4   3   1   16.57    9.02   1-0.79658-0.87682 0.41357 0.48068 0.44091 0.01066
   4  -3   1   13.73    5.92   1-0.45152-0.07085 0.69998 0.89545-0.55330-0.43947
  -4   3  -2  218.31   18.04   1-0.27600-0.64063 0.93950 0.69806-0.20286-0.31981
  -4  -3  -2  204.18   14.60   1-0.47965-0.38199-0.80469-0.92098-0.34986 0.07662
  -4  -3  -2  230.12   16.03   1-0.64337-0.54642-0.70823-0.82639-0.29063 0.13598
   4  -3   2  199.96   14.91   1-0.56088-0.19713 0.00627 0.24773 0.82786 0.94855
   4   3   2  215.02   15.15   1-0.77907-0.87740 0.35532 0.47122 0.51651 0.09008
   4  -3   2  191.68   13.69   1-0.68277-0.32020 0.69797 0.94223-0.21597-0.09831
  -4   3  -3   22.22   10.03   1-0.34942-0.69631 0.90135 0.61098-0.25585-0.37661
  -4  -3  -3   10.43    8.07   1-0.54650-0.43109-0.73677-0.90197-0.39811 0.02455
  -4  -3  -3    6.41    6.71   1-0.58626-0.47149-0.71391-0.88097-0.38291 0.03971
   4  -3   3   16.14    7.13   1-0.58669-0.24073-0.02589 0.26442 0.80939 0.93387
   4   3   3    8.52    9.48   1-0.75583-0.87224 0.29739 0.46195 0.58332 0.16058
  -4   3  -4  442.33   23.89   1-0.41081-0.73997 0.86088 0.52158-0.30016-0.42471
  -4  -3  -4  436.44   23.55   1-0.60026-0.46709-0.66990-0.88401-0.43692-0.01807
  -4  -3  -4  398.00   23.70   1-0.50487-0.37215-0.70914-0.92524-0.49215-0.07367
   4  -3   4  443.36   23.85   1-0.61191-0.28375-0.05884 0.28033 0.78873 0.91700
   4   3   4  415.06   22.42   1-0.72822-0.86270 0.24067 0.45399 0.64169 0.22275
  -4   3  -5 4077.85  182.86   1-0.46097-0.77250 0.82119 0.43284-0.33637-0.46463
  -4  -3  -5 4271.67  190.36   1-0.64348-0.49256-0.60563-0.86865-0.46811-0.05309
  -4  -3  -5 3303.46  218.96   1-0.39037-0.23979-0.68482-0.94981-0.61532-0.20086
   4  -3   5 4068.38  190.00   1-0.63629-0.32592-0.09234 0.29568 0.76590 0.89796
   4   3   5 4018.03  175.14   1-0.69747-0.85003 0.18596 0.44804 0.69206 0.27693
  -4   3  -6 2864.12  128.96   1-0.50122-0.79502 0.78436 0.34708-0.36542-0.49746
  -4  -3  -6 2646.36  121.69   1-0.67836-0.50969-0.54450-0.85643-0.49329-0.08210
  -4  -3  -6 1803.14  200.87   1-0.23226-0.06339-0.62706-0.94075-0.74353-0.33311
   4  -3   6 2679.52  123.06   1-0.65961-0.36704-0.12620 0.31068 0.74093 0.87678
   4   3   6 2657.72  122.94   1-0.66455-0.83519 0.13362 0.44447 0.73519 0.32387
  -4   3  -7  229.14   21.53   1-0.53309-0.80915 0.75162 0.26539-0.38843-0.52424
  -4  -3  -7  247.79   20.63   1-0.70666-0.52023-0.48653-0.84737-0.51371-0.10635
   4  -3   7  239.74   18.20   1-0.68171-0.40694-0.16025 0.32548 0.71385 0.85349
   4   3   7  227.51   19.32   1-0.63038-0.81889 0.08406 0.44369 0.77171 0.36405
  -4   3  -8  577.25   25.27   1-0.55800-0.81633 0.72350 0.18834-0.40641-0.54600
  -4  -3  -8  613.50   24.10   1-0.72973-0.52555-0.43150-0.84125-0.53037-0.12682
   4  -3   8  612.91   22.97   1-0.70243-0.44545-0.19435 0.34024 0.68469 0.82813
   4   3   8  616.35   24.77   1-0.59512-0.80169 0.03673 0.44513 0.80278 0.39891
  -4   3  -9   69.58   13.01   1-0.57711-0.81782 0.70025 0.11627-0.42021-0.56360
  -4  -3  -9   68.13   14.39   1-0.74858-0.52665-0.37909-0.83775-0.54397-0.14425
   4  -3   9   70.31   14.39   1-0.72165-0.48247-0.22838 0.35506 0.65349 0.80071
   4   3   9   68.78   15.31   1-0.55930-0.78392-0.00821 0.44895 0.82892 0.42883
  -4   3 -10  271.33   22.08   1-0.59169-0.81467 0.68145 0.04853-0.43072-0.57788
  -4  -3 -10  285.13   22.48   1-0.76396-0.52440-0.32898-0.83650-0.55508-0.15890
   4  -3  10  284.83   19.06   1-0.73925-0.51787-0.26225 0.37006 0.62025 0.77127
   4   3  10  305.12   23.38   1-0.52313-0.76581-0.05094 0.45499 0.85072 0.45442
  -4   3 -11  219.27   23.58   1-0.60243-0.80769 0.66693-0.01492-0.43848-0.58940
  -4  -3 -11  194.91   17.33   1-0.77648-0.51918-0.28078-0.83722-0.56411-0.17173
   4  -3  11  203.31   19.44   1-0.75514-0.55155-0.29585 0.38531 0.58500 0.73980
   4   3  11  201.62   19.68   1-0.48682-0.74754-0.09157 0.46312 0.86868 0.47612
  -4   3 -12  767.57   32.65   1-0.61000-0.79755 0.65635-0.07444-0.44395-0.59863
  -4  -3 -12  746.86   26.65   1-0.78654-0.51150-0.23424-0.83960-0.57138-0.18279
   4  -3  12  734.67   28.71   1-0.76910-0.58304-0.32881 0.40122 0.54804 0.70645
   4   3  12  776.30   29.44   1-0.45037-0.72915-0.13037 0.47310 0.88326 0.49448
  -4   3 -13  605.90   38.48   1-0.61491-0.78474 0.64932-0.13041-0.44749-0.60594
  -4  -3 -13  604.32   40.84   1-0.79447-0.50169-0.18910-0.84339-0.57710-0.19232
   4  -3  13  574.56   38.28   1-0.78127-0.61299-0.36166 0.41723 0.50872 0.67093
   4   3  13  644.44   40.52   1-0.41387-0.71069-0.16746 0.48478 0.89480 0.50979
  -4   3 -14  553.46   41.32   1-0.61755-0.76966 0.64550-0.18317-0.44939-0.61160
  -4  -3 -14  596.63   42.26   1-0.80051-0.49000-0.14514-0.84835-0.58146-0.20048
   4  -3  14  516.06   42.70   1-0.79142-0.64091-0.39403 0.43372 0.46731 0.63332
   4   3  14  626.97   45.03   1-0.37731-0.69219-0.20299 0.49802 0.90356 0.52234
  -4   3 -15   80.31   19.43   1-0.61821-0.75260 0.64454-0.23307-0.44987-0.61584
  -4  -3 -15   63.54   24.60   1-0.80486-0.47661-0.10216-0.85429-0.58460-0.20741
   4  -3  15   84.29   20.91   1-0.79942-0.66670-0.42585 0.45076 0.42374 0.59356
   4   3  15   77.91   26.44   1-0.34068-0.67363-0.23711 0.51267 0.90978 0.53234
   4  -4 -14  165.96   18.68   1-0.74147-0.01605-0.39980-0.92006-0.53885-0.39142
  -4  -4  14  146.10   20.31   1-0.74574-0.85666-0.66309 0.02200-0.06465 0.51540
  -4   4  14  160.41   21.02   1 0.02406-0.70368-0.51170 0.00372 0.85882 0.71050
   4   4 -13  394.61   29.32   1-0.46162-0.37132 0.82063 0.18120-0.33684-0.91065
   4  -4 -13  446.88   28.78   1-0.71951-0.01184-0.45690-0.92825-0.52299-0.37175
  -4  -4  13  392.75   25.85   1-0.75283-0.84604-0.65676-0.02058-0.04346 0.53272
  -4   4  13  435.56   27.85   1 0.00896-0.70076-0.50243-0.03581 0.86457 0.71249
   4   4 -12  271.90   19.80   1-0.44557-0.37300 0.83406 0.24358-0.32525-0.89528
   4  -4 -12  240.24   22.78   1-0.69349-0.00357-0.51462-0.93706-0.50421-0.34914
  -4  -4  12  239.73   17.82   1-0.75879-0.83427-0.65086-0.06359-0.02463 0.54766
  -4   4  12  230.85   19.61   1-0.00464-0.69634-0.49393-0.07612 0.86948 0.71365
   4   4 -11  963.05   49.54   1-0.42442-0.36958 0.85074 0.30919-0.30999-0.87624
   4  -4 -11  995.85   48.65   1-0.66294 0.00922-0.57273-0.94626-0.48216-0.32326
  -4  -4  11  964.28   45.86   1-0.76369-0.82145-0.64552-0.10716-0.00831 0.56011
  -4   4  11  967.15   48.53   1-0.01654-0.69023-0.48638-0.11738 0.87358 0.71400
   4   4 -10  103.81   13.89   1-0.39716-0.35994 0.87061 0.37822-0.29031-0.85287
   4  -4 -10   85.62   17.25   1-0.62738 0.02702-0.63086-0.95549-0.45649-0.29377
  -4  -4  10   93.94   14.04   1-0.76760-0.80764-0.64090-0.15146 0.00533 0.56988
  -4   4  10  108.03   20.49   1-0.02648-0.68215-0.47999-0.15980 0.87687 0.71353
   4   4 -10  101.81   13.46   1-0.71127-0.66941 0.68586 0.19504-0.15386-0.71683
   4   4  -9 1234.42   59.43   1-0.36311-0.34362 0.89304 0.44958-0.26573-0.82449
   4  -4  -9 1305.45   59.91   1-0.58631 0.05034-0.68849-0.96421-0.42685-0.26030
  -4  -4   9 1222.72   59.12   1-0.77056-0.79289-0.63715-0.19662 0.01609 0.57677
  -4   4   9 1168.47   56.03   1-0.03412-0.67177-0.47502-0.20365 0.87930 0.71221
   4   4  -9 1213.74   57.91   1-0.72907-0.70529 0.67550 0.23346-0.11022-0.66936
   4   4  -8  141.52   13.57   1-0.32111-0.31936 0.91731 0.52278-0.23542-0.79038
   4  -4  -8  153.34   16.98   1-0.53927 0.07963-0.74486-0.97166-0.39289-0.22252
  -4  -4   8  134.67   15.22   1-0.77259-0.77720-0.63445-0.24283 0.02371 0.58050
  -4   4   8  142.10   18.33   1-0.03901-0.65863-0.47183-0.24926 0.88082 0.70997
   4   4  -8  148.89   13.69   1-0.74762-0.74193 0.66148 0.26823-0.05915-0.61447
   4   4  -7  552.91   24.62   1-0.27024-0.28623 0.94206 0.59647-0.19870-0.74986
   4  -4  -7  565.20   26.23   1-0.48588 0.11526-0.79896-0.97685-0.35435-0.18016
  -4  -4   7  526.21   26.61   1-0.77367-0.76056-0.63296-0.29026 0.02784 0.58076
   4  -4  -7  479.26   24.09   1-0.60259-0.00223-0.04647-0.22396 0.79669 0.97459
  -4   4   7  495.24   25.57   1-0.04053-0.64213-0.47083-0.29707 0.88129 0.70668
   4   4  -7  542.40   25.85   1-0.76581-0.77821 0.64305 0.29859-0.00096-0.55246
   4   4  -6  382.71   26.21   1-0.20965-0.24307 0.96541 0.66884-0.15497-0.70253
   4  -4  -6  372.75   20.31   1-0.42600 0.15739-0.84953-0.97852-0.31113-0.13311
  -4  -4   6  380.81   24.93   1-0.77374-0.74291-0.63287-0.33908 0.02811 0.57715
   4  -4  -6  363.24   17.99   1-0.59218-0.00963-0.03293-0.16157 0.80512 0.98681
  -4   4   6  347.30   19.51   1-0.03785-0.62144-0.47259-0.34764 0.88046 0.70210
   4   4  -6  406.70   25.76   1-0.78235-0.81283 0.61958 0.32391 0.06355-0.48412
  -4   4   5  205.77   16.18   1 0.36209-0.20370 0.89580 0.97606 0.25773 0.07614
   4   4  -5  232.27   18.73   1-0.13983-0.19101 0.98463 0.73700-0.10457-0.64833
  -4  -4   5  197.58   16.65   1-0.77267-0.72412-0.63434-0.38947 0.02401 0.56917
   4  -4  -5  196.06   13.72   1-0.58786-0.02310-0.02739-0.10717 0.80849 0.99397
  -4   4   5  197.75   15.77   1-0.02980-0.59536-0.47784-0.40170 0.87794 0.69582
   4   4  -5  221.85   15.52   1-0.79583-0.84438 0.59073 0.34380 0.13298-0.41087
  -4   4   4  302.29   24.47   1 0.29007-0.25800 0.93462 0.96592 0.20575 0.02040
   4   4  -4  329.16   24.36   1-0.06154-0.13047 0.99694 0.79825-0.04805-0.58802
  -4  -4   4  328.31   24.11   1-0.77025-0.70398-0.63756-0.44159 0.01495 0.55623
   4  -4  -4  320.54   22.29   1-0.58832-0.04136-0.02798-0.05890 0.80813 0.99740
  -4   4   4  296.81   23.12   1-0.01466-0.56221-0.48758-0.46024 0.87295 0.68708
   4   4  -4  309.48   23.56   1-0.80503-0.87167 0.55644 0.35830 0.20565-0.33437
  -4   4   3 1058.43   60.13   1 0.21342-0.31693 0.96530 0.94765 0.15042-0.03868
   4   4  -3 1141.86   61.79   1 0.02303-0.06362 0.99965 0.84986 0.01299-0.52314
  -4  -4   3 1112.59   61.58   1-0.76615-0.68216-0.64265-0.49560 0.00020 0.53761
   4  -4  -3 1145.22   63.33   1-0.59259-0.06342-0.03345-0.01552 0.80480 0.99786
  -4   4   3 1165.06   64.75   1 0.01010-0.51941-0.50314-0.52462 0.86414 0.67451
   4   4  -3 1113.60   62.36   1-0.80899-0.89372 0.51718 0.36782 0.27938-0.25681
   4   4  -2   15.40   10.17   1 0.11101 0.00661 0.99087 0.89003 0.07649-0.45584
  -4   4   2   10.28    9.87   1 0.13371-0.37897 0.98665 0.91999 0.09288-0.09989
  -4  -4   2    9.30   13.09   1-0.75987-0.65815-0.64973-0.55159-0.02111 0.51241
   4  -4  -2    7.56   10.85   1-0.59987-0.08850-0.04291 0.02387 0.79894 0.99579
  -4   4   2    4.67    9.16   1 0.04854-0.46296-0.52636-0.59665 0.84887 0.65549
   4   4  -2   11.84    9.89   1-0.80722-0.91005 0.47376 0.37319 0.35203-0.18034
   4   4  -1  261.97   20.56   1 0.19870 0.07656 0.97003 0.91815 0.13979-0.38876
  -4   4   1  251.92   21.39   1 0.05312-0.44182 0.99798 0.88237 0.03471-0.16185
  -4  -4   1  261.40   19.32   1-0.75066-0.63123-0.65878-0.60956-0.05009 0.47956
   4  -4  -1  267.68   20.30   1-0.60953-0.11595-0.05566 0.05998 0.79080 0.99144
  -4   4   1  260.61   20.05   1 0.10729-0.38618-0.55966-0.67876 0.82174 0.62460
   4   4  -1  250.54   18.58   1-0.79975-0.92063 0.42735 0.37550 0.42162-0.10694
   4   4   0  277.46   20.51   1 0.28251 0.14272 0.93812 0.93505 0.20028-0.32450
  -4   4   0  234.82   22.47   1-0.02625-0.50346 0.99940 0.83477-0.02258-0.22288
  -4  -4   0  256.57   20.55   1-0.73743-0.60028-0.66965-0.66934-0.08802 0.43775
   4  -4   0  264.69   19.50   1-0.62102-0.14524-0.07115 0.09334 0.78055 0.98498
  -4   4   0  231.73   17.83   1 0.19828-0.27716-0.60588-0.77382 0.77044 0.56953
   4   4   0  262.11   18.10   1-0.78693-0.92589 0.37894 0.37587 0.48697-0.03777
   4   4   1  428.87   29.16   1 0.36028 0.20278 0.89690 0.94279 0.25643-0.26460
  -4   4  -1  374.99   25.86   1-0.10199-0.56144 0.99178 0.77821-0.07725-0.28135
  -4  -4  -1  391.70   27.45   1-0.71858-0.56371-0.68191-0.73052-0.13646 0.38543
   4  -4   1  407.00   25.00   1-0.63388-0.17589-0.08895 0.12440 0.76829 0.97651
   4   4   1  378.75   24.76   1-0.76944-0.92649 0.32966 0.37538 0.54706 0.02613
  -4   4  -2  567.88   35.41   1-0.17238-0.61408 0.97666 0.71416-0.12806-0.33597
  -4  -4  -2  580.46   35.02   1-0.42489-0.25022-0.85038-0.94582-0.31033 0.20689
  -4  -4  -2  613.93   38.12   1-0.69250-0.51870-0.69436-0.79196-0.19567 0.32207
   4  -4   2  599.32   36.17   1-0.64771-0.20752-0.10867 0.15353 0.75409 0.96610
   4   4   2  591.19   34.64   1-0.74808-0.92324 0.28048 0.37487 0.60141 0.08416
  -4   4  -3  617.98   39.50   1-0.23611-0.66018 0.95600 0.64469-0.17406-0.38538
  -4  -4  -3  591.32   36.00   1-0.48678-0.29435-0.79813-0.94247-0.35500 0.15839
  -4  -4  -3  598.75   37.45   1-0.65445-0.46283-0.70597-0.85248-0.27071 0.24302
   4  -4   3  572.23   34.91   1-0.66215-0.23976-0.13001 0.18105 0.73799 0.95379
   4   4   3  582.19   34.77   1-0.72359-0.91684 0.23199 0.37514 0.65006 0.13662
  -4   4  -4   83.86   15.41   1-0.29258-0.69891 0.93179 0.57155-0.21482-0.42993
  -4  -4  -4  105.63   13.91   1-0.54052-0.33034-0.74347-0.93673-0.39379 0.11577
  -4  -4  -4   91.81   12.50   1-0.59984-0.39039-0.71336-0.90877-0.36235 0.14738
   4  -4   4  107.19   14.00   1-0.67693-0.27233-0.15270 0.20722 0.72003 0.93962
   4   4   4   96.40   11.86   1-0.69669-0.90801 0.18466 0.37658 0.69319 0.18355
  -4   4  -5 1331.51   44.76   1-0.34158-0.73018 0.90593 0.49675-0.25019-0.46911
  -4  -4  -5 1419.34   39.09   1-0.58675-0.35882-0.68792-0.93009-0.42716 0.07857
  -4  -4  -5  970.84   79.27   1-0.52070-0.29330-0.71102-0.95544-0.47255 0.03301
   4  -4   5 1314.63   42.93   1-0.69176-0.30496-0.17649 0.23228 0.70022 0.92360
   4   4   5 1346.23   39.19   1-0.66794-0.89734 0.13879 0.37947 0.73114 0.22531
  -4   4  -6   -0.30   12.66   1-0.38340-0.75426 0.87999 0.42187-0.28038-0.50309
  -4  -4  -6   14.36   11.46   1-0.62631-0.38062-0.63249-0.92357-0.45571 0.04620
   4  -4   6    9.94   10.54   1-0.70642-0.33742-0.20121 0.25642 0.67858 0.90575
   4   4   6   14.36   12.64   1-0.63801-0.88527 0.09477 0.38423 0.76417 0.26201
  -4   4  -7 1497.63   48.92   1-0.41856-0.77168 0.85517 0.34812-0.30576-0.53226
  -4  -4  -7 1629.77   48.96   1-0.66003-0.39660-0.57783-0.91781-0.48006 0.01803
   4  -4   7 1546.33   49.44   1-0.72071-0.36950-0.22666 0.27983 0.65513 0.88609
   4   4   7 1390.36   42.67   1-0.60689-0.87221 0.05215 0.39038 0.79307 0.29469
  -4   4  -8  709.00   40.73   1-0.44773-0.78326 0.83230 0.27616-0.32681-0.55698
  -4  -4  -8  699.27   38.55   1-0.68874-0.40755-0.52426-0.91315-0.50078-0.00650
   4  -4   8  689.81   39.07   1-0.73444-0.40103-0.25269 0.30266 0.62986 0.86461
   4   4   8  713.33   40.05   1-0.57501-0.85839 0.01115 0.39814 0.81806 0.32347
  -4   4  -9  466.96   29.49   1-0.47159-0.78939 0.81193 0.20685-0.34404-0.57798
  -4  -4  -9  457.42   29.42   1-0.71311-0.41417-0.47196-0.90976-0.51837-0.02792
   4  -4   9  455.17   26.36   1-0.74746-0.43184-0.27916 0.32504 0.60280 0.84134
   4   4   9  453.18   28.67   1-0.54256-0.84400-0.02828 0.40748 0.83953 0.34872
  -4   4 -10  227.43   20.19   1-0.49082-0.79089 0.79434 0.14032-0.35792-0.59564
  -4  -4 -10  207.68   19.57   1-0.73375-0.41706-0.42096-0.90767-0.53327-0.04665
   4  -4  10  198.06   16.98   1-0.75945-0.46132-0.30560 0.34744 0.57431 0.81637
   4   4  10  206.83   21.78   1-0.50972-0.82919-0.06619 0.41833 0.85778 0.37072
  -4   4 -11 1931.40  100.02   1-0.50603-0.78837 0.77964 0.07668-0.36890-0.61040
  -4  -4 -11 1851.91   95.27   1-0.75116-0.41672-0.37122-0.90684-0.54584-0.06304
   4  -4  11 2007.59  102.69   1-0.77060-0.49026-0.33263 0.36928 0.54361 0.78947
   4   4  11 2003.11  106.43   1-0.47650-0.81402-0.10275 0.43054 0.87314 0.38986
  -4   4 -12    2.15   18.75   1-0.51774-0.78235 0.76781 0.01591-0.37735-0.62263
  -4  -4 -12    2.15   18.39   1-0.76573-0.41367-0.32267-0.90715-0.55635-0.07704
   4  -4  12   -6.58   17.06   1-0.78061-0.51805-0.35976 0.39101 0.51108 0.76073
   4   4  12   -4.41   16.70   1-0.44299-0.79856-0.13801 0.44404 0.88583 0.40633
  -4   4 -13 1098.90   49.50   1-0.52641-0.77328 0.75876-0.04206-0.38361-0.63266
  -4  -4 -13 1097.28   52.61   1-0.77780-0.40800-0.27516-0.90857-0.56506-0.08955
   4  -4  13 1053.88   45.80   1-0.78935-0.54457-0.38690 0.41273 0.47667 0.73013
   4   4  13 1111.35   48.66   1-0.40921-0.78284-0.17207 0.45876 0.89606 0.42034
  -4   4 -14   82.31   21.69   1-0.53239-0.76153 0.75237-0.09740-0.38793-0.64075
  -4  -4 -14   78.04   18.71   1-0.78763-0.40009-0.22861-0.91095-0.57216-0.10044
   4  -4  14   65.58   22.13   1-0.79668-0.56967-0.41398 0.43451 0.44035 0.69761
   4   4  14   60.88   15.93   1-0.37518-0.76687-0.20501 0.47459 0.90399 0.43204
   4  -5 -12   52.37   17.73   1-0.66775 0.09917-0.56414-0.96573-0.48563-0.23983
  -4  -5  12   35.20   16.93   1-0.76161-0.76043-0.64784-0.04002-0.01532 0.64818
  -4   5  12   31.42   15.63   1-0.00710-0.77564-0.49237-0.09595 0.87035 0.62383
   4   5 -11  373.65   25.23   1-0.29546-0.31767 0.93040 0.36813-0.21690-0.87381
   4  -5 -11  459.23   29.87   1-0.63586 0.11330-0.61778-0.97046-0.46261-0.21299
  -4  -5  11  400.57   26.41   1-0.76602-0.74711-0.64281-0.08391-0.00025 0.65937
  -4   5  11  447.12   27.70   1-0.01870-0.76921-0.48500-0.13739 0.87431 0.62403
   4   5 -10  321.70   23.61   1-0.26642-0.30637 0.94373 0.43038-0.19594-0.84905
   4  -5 -10  331.22   25.55   1-0.59985 0.13156-0.67047-0.97423-0.43662-0.18317
  -4  -5  10  308.53   24.57   1-0.76953-0.73291-0.63848-0.12849 0.01232 0.66807
  -4   5  10  301.65   22.38   1-0.02836-0.76086-0.47877-0.17997 0.87748 0.62345
   4   5  -9   78.78   17.99   1-0.23186-0.28955 0.95760 0.49319-0.17099-0.82031
   4  -5  -9   72.92   17.68   1-0.55953 0.15413-0.72170-0.97656-0.40751-0.15024
  -4  -5   9   75.95   12.59   1-0.77220-0.71786-0.63498-0.17390 0.02224 0.67411
  -4   5   9   81.15   14.36   1-0.03579-0.75027-0.47394-0.22395 0.87982 0.62204
   4   5  -8  182.39   21.21   1-0.19121-0.26626 0.97127 0.55587-0.14165-0.78746
   4  -5  -8  151.48   15.23   1-0.51476 0.18114-0.77086-0.97681-0.37520-0.11410
  -4  -5   8  141.17   19.56   1-0.77404-0.70197-0.63245-0.22029 0.02927 0.67727
  -4   5   8  155.83   22.08   1-0.04056-0.73701-0.47081-0.26963 0.88129 0.61975
   4   5  -7  118.87   15.93   1-0.14481-0.23762 0.98352 0.61707-0.10816-0.75017
   4  -5  -7  135.37   15.57   1-0.46555 0.21260-0.81723-0.97427-0.33968-0.07475
  -4  -5   7  129.87   18.67   1-0.77504-0.68525-0.63103-0.26778 0.03316 0.67728
  -4   5   7  142.23   16.20   1-0.04211-0.72055-0.46979-0.31742 0.88177 0.61647
   4   5  -6   46.55   15.42   1-0.09256-0.20312 0.99321 0.67569-0.07044-0.70864
   4  -5  -6   42.88   12.04   1-0.41203 0.24837-0.85999-0.96812-0.30105-0.03230
  -4  -5   6   55.31   11.49   1-0.77515-0.66764-0.63088-0.31654 0.03358 0.67382
  -4   5   6   38.83   16.62   1-0.03971-0.70012-0.47137-0.36781 0.88103 0.61198
   4   5  -6   54.56   10.40   1-0.80909-0.91636 0.51192 0.19483 0.28863-0.34972
  -4   5   5  125.74   19.22   1 0.35713-0.28578 0.89880 0.95812 0.25415-0.01808
   4   5  -5  116.35   15.05   1-0.03491-0.16323 0.99897 0.73039-0.02883-0.66323
  -4  -5   5  125.02   17.10   1-0.77427-0.64905-0.63213-0.36670 0.03016 0.66652
   4  -5  -5  120.20   12.66   1-0.69845-0.05726-0.18762-0.24665 0.69061 0.96741
  -4   5   5  120.80   13.24   1-0.03229-0.67469-0.47622-0.42147 0.87873 0.60592
   4   5  -5  104.85   13.43   1-0.80775-0.93312 0.47922 0.21091 0.34333-0.29119
  -4   5   4   27.44   13.46   1 0.29624-0.32895 0.93169 0.94204 0.21020-0.06579
   4   5  -4   29.51   13.34   1 0.02716-0.11889 0.99950 0.77983 0.01597-0.61459
  -4  -5   4   37.27   12.05   1-0.77225-0.62931-0.63491-0.41841 0.02241 0.65490
   4  -5  -4   31.86   11.02   1-0.69251-0.06911-0.17773-0.18790 0.69916 0.97975
  -4   5   4   24.80   12.19   1-0.01836-0.64274-0.48521-0.47927 0.87420 0.59764
   4   5  -4   31.28   13.28   1-0.80296-0.94638 0.44366 0.22406 0.39801-0.23268
  -4   5   3   54.18   13.77   1 0.23277-0.37471 0.95853 0.91993 0.16438-0.11536
   4   5  -3   57.47   12.45   1 0.09257-0.07122 0.99369 0.82297 0.06318-0.56358
  -4  -5   3   57.86   13.94   1-0.76884-0.60817-0.63936-0.47176 0.00978 0.63839
   4  -5  -3   57.95    9.94   1-0.68981-0.08420-0.17330-0.13461 0.70293 0.98731
  -4   5   3   46.59   12.73   1 0.00433-0.60202-0.49956-0.54242 0.86626 0.58595
   4   5  -3   52.10   12.74   1-0.79459-0.95611 0.40568 0.23487 0.45170-0.17517
  -4   5   2  114.82   17.10   1 0.16771-0.42210 0.97881 0.89121 0.11742-0.16599
   4   5  -2  134.12   16.03   1 0.15964-0.02188 0.98084 0.85907 0.11160-0.51138
  -4  -5   2   87.06   13.08   1-0.76366-0.58528-0.64556-0.52687-0.00841 0.61631
   4  -5  -2  121.33   12.31   1-0.68983-0.10202-0.17333-0.08579 0.70290 0.99107
  -4   5   2  115.27   12.56   1 0.03934-0.54898-0.52091-0.61259 0.85270 0.56863
   4   5  -2  132.22   13.40   1-0.78275-0.96235 0.36601 0.24399 0.50332-0.11974
   4   5  -1  280.56   19.94   1 0.22648 0.02728 0.96081 0.88783 0.15984-0.45935
  -4   5   1  284.44   19.88   1 0.10234-0.46974 0.99226 0.85572 0.07023-0.21697
  -4  -5   1  348.97   20.88   1-0.75617-0.56007-0.65353-0.58376-0.03303 0.58782
   4  -5  -1  308.40   19.21   1-0.69211-0.12210-0.17707-0.04067 0.69972 0.99168
   4   5  -1  304.01   15.44   1-0.76768-0.96538 0.32528 0.25204 0.55212-0.06712
   4   5   0   91.96   16.38   1 0.29192 0.07501 0.93375 0.90973 0.20708-0.40835
  -4   5   0   74.92   12.74   1 0.03786-0.51647 0.99900 0.81351 0.02370-0.26730
  -4  -5   0   93.49   14.66   1-0.74559-0.53177-0.66321-0.64235-0.06508 0.55189
   4  -5   0   82.61   12.16   1-0.69625-0.14404-0.18393 0.00132 0.69382 0.98957
   4   5   0   88.23   12.59   1-0.74973-0.96558 0.28401 0.25947 0.59768-0.01787
   4   5   1   -3.05   12.33   1 0.35435 0.11972 0.90047 0.92541 0.25214-0.35953
  -4   5  -1   -5.92   15.73   1-0.02457-0.56117 0.99946 0.76495-0.02137-0.31610
  -4  -5  -1    0.25    9.90   1-0.73077-0.49923-0.67436-0.70242-0.10579 0.50730
   4  -5   1   -4.25   11.64   1-0.70190-0.16748-0.19345 0.04066 0.68549 0.98503
   4   5   1   -0.51    9.32   1-0.72935-0.96327 0.24283 0.26705 0.63959 0.02782
  -4   5  -2  540.13   29.28   1-0.08369-0.60253 0.99443 0.71097-0.06404-0.36258
  -4  -5  -2  513.73   22.43   1-0.40756-0.15588-0.86324-0.93782-0.29782 0.31012
  -4  -5  -2  468.51   26.76   1-0.71006-0.46080-0.68648-0.76345-0.15668 0.45254
   4  -5   2  538.08   24.42   1-0.70873-0.19211-0.20523 0.07774 0.67496 0.97828
   4   5   2  515.47   25.16   1-0.70689-0.95889 0.20202 0.27501 0.67785 0.06989
  -4   5  -3  175.93   22.84   1-0.13871-0.63979 0.98488 0.65249-0.10375-0.40610
  -4  -5  -3  204.24   15.49   1-0.46146-0.19203-0.82076-0.94425-0.33673 0.26739
  -4  -5  -3  148.20   16.76   1-0.68183-0.41335-0.69829-0.82425-0.21789 0.38697
   4  -5   3  175.67   14.13   1-0.71647-0.21764-0.21895 0.11287 0.66236 0.96947
   4   5   3  184.21   13.63   1-0.68271-0.95279 0.16185 0.28360 0.71253 0.10838
  -4   5  -4   54.97   12.33   1-0.18903-0.67236 0.97192 0.59059-0.14008-0.44623
  -4  -5  -4   53.10   13.42   1-0.51041-0.22323-0.77526-0.94766-0.37206 0.22823
  -4  -5  -4   34.98   11.13   1-0.64093-0.35463-0.70867-0.88353-0.29491 0.30594
   4  -5   4   34.09   14.68   1-0.72486-0.24383-0.23435 0.14633 0.64780 0.95871
   4   5   4   48.72   15.37   1-0.65729-0.94525 0.12274 0.29326 0.74356 0.14312
  -4   5  -5  555.32   34.81   1-0.23434-0.70012 0.95667 0.52654-0.17278-0.48226
  -4  -5  -5  601.53   32.74   1-0.55440-0.24946-0.72771-0.94902-0.40381 0.19266
   4  -5   5  557.92   31.37   1-0.73367-0.27043-0.25117 0.17836 0.63137 0.94607
   4   5   5  565.27   31.56   1-0.63058-0.93660 0.08434 0.30362 0.77152 0.17485
  -4   5  -6  215.20   22.27   1-0.27451-0.72255 0.94017 0.46111-0.20178-0.51506
  -4  -5  -6  223.88   16.36   1-0.59360-0.27091-0.67890-0.94912-0.43211 0.16053
   4  -5   6  245.44   16.73   1-0.74269-0.29725-0.26923 0.20916 0.61311 0.93160
   4   5   6  252.80   17.70   1-0.60293-0.92701 0.04693 0.31498 0.79640 0.20352
  -4   5  -7   -7.39   15.95   1-0.30965-0.73996 0.92331 0.39532-0.22715-0.54422
  -4  -5  -7   10.27   14.23   1-0.62832-0.28788-0.62944-0.94857-0.45717 0.13165
   4  -5   7    1.11   13.32   1-0.75173-0.32409-0.28834 0.23891 0.59308 0.91536
   4   5   7   -1.71   15.20   1-0.57451-0.91665 0.01052 0.32735 0.81842 0.22933
  -4   5  -8  289.47   22.59   1-0.33999-0.75256 0.90685 0.32992-0.24904-0.56991
  -4  -5  -8  278.56   18.05   1-0.65890-0.30071-0.57979-0.94783-0.47924 0.10575
   4  -5   8  253.47   19.86   1-0.76045-0.35027-0.30792 0.26813 0.57174 0.89744
   4   5   8  302.46   18.00   1-0.54544-0.90563-0.02487 0.34071 0.83778 0.25246
  -4   5  -9   91.33   20.59   1-0.36583-0.76066 0.89134 0.26548-0.26770-0.59236
  -4  -5  -9   84.27   19.34   1-0.68571-0.30977-0.53027-0.94721-0.49860 0.08257
   4  -5   9   82.07   18.12   1-0.76904-0.37664-0.32867 0.29624 0.54821 0.87771
   4   5   9   86.96   16.89   1-0.51581-0.89406-0.05931 0.35505 0.85464 0.27311
  -4   5 -10  680.81   47.09   1-0.38755-0.76464 0.87721 0.20241-0.28337-0.61183
  -4  -5 -10  735.76   48.91   1-0.70910-0.31540-0.48108-0.94693-0.51548 0.06186
   4  -5  10  695.46   47.80   1-0.77717-0.40255-0.35004 0.32373 0.52293 0.85623
   4   5  10  720.87   51.53   1-0.48573-0.88200-0.09276 0.37035 0.86917 0.29138
  -4   5 -11  403.82   31.36   1-0.40549-0.76484 0.86473 0.14100-0.29632-0.62858
  -4  -5 -11  355.51   22.56   1-0.72940-0.31795-0.43235-0.94711-0.53013 0.04339
   4  -5  11  343.50   26.54   1-0.78469-0.42785-0.37191 0.35073 0.49591 0.83302
   4   5  11  343.09   21.82   1-0.45517-0.86950-0.12537 0.38651 0.88153 0.30752
  -4   5 -12   17.96   19.98   1-0.42001-0.76163 0.85407 0.08141-0.30681-0.64286
  -4  -5 -12   33.98   17.32   1-0.74689-0.31769-0.38414-0.94781-0.54275 0.02694
   4  -5  12   33.35   21.75   1-0.79146-0.45239-0.39416 0.37734 0.46714 0.80805
   4   5  12   28.57   20.07   1-0.42420-0.85658-0.15713 0.40352 0.89183 0.32160
   4  -6  -9    0.74   19.08   1-0.54824 0.24243-0.73480-0.96880-0.39936-0.05136
  -4  -6   9   -2.09   15.39   1-0.76907-0.63805-0.63906-0.15744 0.01063 0.75371
  -4   6   9   13.07   12.46   1-0.01969-0.81100-0.48436-0.25576 0.87464 0.52617
   4   6  -8 1330.68   62.46   1-0.07836-0.23055 0.99510 0.55876-0.06019-0.79663
   4  -6  -8 1516.85   62.31   1-0.50695 0.26596-0.77872-0.96381-0.36956-0.01773
  -4  -6   8 1601.35   64.11   1-0.77073-0.62199-0.63694-0.20423 0.01671 0.75591
  -4   6   8 1480.61   67.78   1-0.02324-0.79654-0.48208-0.30228 0.87581 0.52358
   4   6  -7   62.95   17.17   1-0.03780-0.20776 0.99880 0.61140-0.03092-0.76355
   4  -6  -7   71.85   18.96   1-0.46252 0.29265-0.81986-0.95604-0.33749 0.01816
  -4  -6   7   71.31   13.30   1-0.77157-0.60512-0.63582-0.25203 0.01986 0.75518
  -4   6   7   58.98   17.72   1-0.02353-0.77880-0.48189-0.35091 0.87591 0.51992
   4   6  -6 1772.22   71.07   1 0.00648-0.18122 0.99997 0.66147 0.00104-0.72773
   4  -6  -6 1698.33   61.36   1-0.41515 0.32226-0.85770-0.94498-0.30329 0.05618
  -4  -6   6 1874.57   66.32   1-0.77156-0.58738-0.63584-0.30096 0.01981 0.75126
  -4   6   6 1702.05   64.91   1-0.01980-0.75705-0.48429-0.40212 0.87467 0.51494
  -4   6   5   16.02   20.90   1 0.36798-0.35205 0.89215 0.93052 0.26198-0.10089
   4   6  -5    6.63   13.90   1 0.05423-0.15121 0.99789 0.70834 0.03551-0.68948
  -4  -6   5   19.75   16.06   1-0.77060-0.56871-0.63710-0.35113 0.01625 0.74382
  -4   6   4 4179.46   83.25   1 0.31590-0.38643 0.92187 0.91128 0.22439-0.14225
   4   6  -4 3657.63  148.15   1 0.10471-0.11847 0.99189 0.75129 0.07195-0.64925
  -4  -6   4 4023.27   79.41   1-0.76856-0.54894-0.63971-0.40265 0.00878 0.73247
   4  -6  -4 3933.02  185.86   1-0.75517-0.05533-0.29592-0.28532 0.58492 0.95683
  -4   6   3  158.97   20.22   1 0.26226-0.42234 0.94696 0.88741 0.18567-0.18472
   4   6  -3  149.47   18.01   1 0.15714-0.08378 0.98145 0.78979 0.10979-0.60762
  -4  -6   3  168.06   18.61   1-0.76521-0.52788-0.64376-0.45562-0.00305 0.71676
   4  -6  -3  179.41   17.46   1-0.75048-0.06843-0.28562-0.22617 0.59598 0.97167
   4   6  -2 3541.87  149.35   1 0.21039-0.04821 0.96631 0.82342 0.14823-0.56536
  -4   6   2 3415.10  141.19   1 0.20776-0.45913 0.96717 0.85865 0.14633-0.22782
  -4  -6   2 3526.07  152.35   1-0.76026-0.50520-0.64931-0.51008-0.01982 0.69611
   4  -6  -2 3213.26  138.58   1-0.74774-0.08350-0.27977-0.17147 0.60215 0.98164
   4   6  -2 3288.51  143.88   1-0.73407-0.99060 0.25195 0.10849 0.63059-0.08328
   4   6  -1   73.14   15.52   1 0.26402-0.01230 0.94622 0.85230 0.18694-0.52290
  -4   6   1   72.77   19.41   1 0.15314-0.49607 0.98240 0.82492 0.10691-0.27094
  -4  -6   1   53.82   14.22   1-0.75324-0.48047-0.65638-0.56607-0.04220 0.66985
   4  -6  -1   33.70   10.77   1-0.74675-0.10030-0.27768-0.12052 0.60435 0.98763
   4   6  -1   58.03   13.26   1-0.71649-0.99109 0.21898 0.12427 0.66233-0.04774
   4   6   0 1776.51   44.97   1 0.31685 0.02280 0.92138 0.87641 0.22507-0.48101
  -4   6   0 1646.17   46.09   1 0.09920-0.53227 0.99274 0.78631 0.06797-0.31366
  -4  -6   0 1673.02   46.72   1-0.74352-0.45303-0.66492-0.62352-0.07101 0.63716
   4  -6   0 1600.93   42.74   1-0.74727-0.11862-0.27878-0.07276 0.60320 0.99026
   4   6   0 1573.39   38.23   1-0.69738-0.99006 0.18582 0.13988 0.69218-0.01408
   4   6   1   78.05   17.93   1 0.36807 0.05632 0.89210 0.89609 0.26205-0.44027
  -4   6  -1   57.87   18.88   1 0.04669-0.56705 0.99845 0.74308 0.03006-0.35536
  -4  -6  -1   48.36   14.67   1-0.73020-0.42199-0.67475-0.68226-0.10728 0.59702
   4  -6   1   67.66   14.84   1-0.74908-0.13823-0.28262-0.02775 0.59915 0.99001
   4   6   1   49.43   14.36   1-0.67691-0.98767 0.15267 0.15549 0.72004 0.01758
   4  -6   2 3303.28  170.91   1-0.75197-0.15891-0.28885 0.01487 0.59253 0.98718
  -4   6  -3    1.50   14.07   1-0.05144-0.62967 0.99784 0.64450-0.04076-0.43373
  -4  -6  -3   11.04   13.02   1-0.45834-0.11190-0.82343-0.92606-0.33447 0.36037
  -4  -6  -3    2.56   16.52   1-0.68767-0.34233-0.69622-0.80162-0.20587 0.49011
   4  -6   3   -5.52   15.82   1-0.75573-0.18046-0.29715 0.05543 0.58358 0.98201
   4   6   3   -0.30    9.55   1-0.63269-0.97940 0.08728 0.18762 0.76946 0.07451
  -4   6  -4 2602.90  133.40   1-0.09589-0.65637 0.99272 0.59044-0.07285-0.46963
  -4  -6  -4 2593.52  130.33   1-0.50158-0.13739-0.78401-0.93556-0.36568 0.32534
   4  -6   4 2480.58  129.93   1-0.75994-0.20215-0.30676 0.09458 0.57303 0.97477
   4   6   4 2577.58  134.92   1-0.60904-0.97381 0.05501 0.20412 0.79122 0.10006
  -4   6  -5   63.84   18.98   1-0.13682-0.67954 0.98528 0.53407-0.10239-0.50297
  -4  -6  -5   44.94   16.03   1-0.54154-0.15959-0.74234-0.94279-0.39453 0.29267
   4  -6   5   60.43   17.80   1-0.76490-0.22488-0.31848 0.13172 0.55989 0.96543
   4   6   5   62.81   14.50   1-0.58455-0.96739 0.02317 0.22105 0.81102 0.12363
  -4   6  -6 1648.54   60.44   1-0.17403-0.69899 0.97622 0.47606-0.12925-0.53363
  -4  -6  -6 1690.41   60.61   1-0.57815-0.17846-0.69894-0.94830-0.42096 0.26242
   4  -6   6 1625.66   60.55   1-0.77019-0.24795-0.33158 0.16748 0.54483 0.95418
   4   6   6 1641.96   60.17   1-0.55932-0.96021-0.00818 0.23847 0.82890 0.14530
  -4   6  -7   88.91   22.02   1-0.20744-0.71464 0.96614 0.41705-0.15336-0.56155
  -4  -6  -7  101.49   20.65   1-0.61146-0.19402-0.65427-0.95254-0.44500 0.23455
   4  -6   7  102.26   15.79   1-0.77565-0.27119-0.34589 0.20204 0.52793 0.94108
   4   6   7  124.33   18.15   1-0.53341-0.95236-0.03904 0.25638 0.84495 0.16513
  -4   6  -8  666.16   37.71   1-0.23713-0.72687 0.95562 0.35774-0.17480-0.58623
  -4  -6  -8  636.06   32.44   1-0.64157-0.20637-0.60871-0.95589-0.46673 0.20899
   4  -6   8  645.49   34.92   1-0.78113-0.29445-0.36125 0.23554 0.50923 0.92618
   4   6   8  645.68   35.91   1-0.50692-0.94389-0.06934 0.27482 0.85919 0.18313
  -4   6  -9  199.98   24.65   1-0.26310-0.73510 0.94515 0.29834-0.19354-0.60877
  -4  -6  -9  165.92   18.97   1-0.66862-0.21567-0.56256-0.95865-0.48626 0.18564
   4  -6   9  181.34   19.03   1-0.78649-0.31758-0.37752 0.26813 0.48878 0.90952
   4   6   9  175.03   20.54   1-0.47981-0.93483-0.09918 0.29375 0.87174 0.19946
  -4   7   5  214.66   24.71   1 0.38918-0.40799 0.87843 0.89581 0.27729-0.17621
   4   7  -5  181.76   21.00   1 0.13478-0.14779 0.98643 0.67594 0.09366-0.72197
  -4  -7   5  235.87   21.19   1-0.76244-0.48387-0.64693-0.34042-0.01256 0.80621
  -4   7   4    7.73   22.87   1 0.34419-0.43525 0.90641 0.87487 0.24481-0.21247
   4   7  -4    9.10   14.89   1 0.17645-0.12386 0.97649 0.71495 0.12373-0.68810
  -4  -7   4   -1.69   19.11   1-0.76010-0.46381-0.64948-0.39188-0.02035 0.79454
  -4   7   3    5.27   15.27   1 0.29820-0.46353 0.93074 0.85024 0.21161-0.24943
   4   7  -3    6.31   14.07   1 0.21924-0.09877 0.96334 0.75054 0.15462-0.65338
  -4  -7   3    6.82   15.03   1-0.75644-0.44244-0.65326-0.44457-0.03217 0.77884
   4   7  -2   53.93   17.11   1 0.26304-0.07268 0.94663 0.78280 0.18624-0.61800
  -4   7   2   50.63   19.12   1 0.25170-0.49232 0.95128 0.82182 0.17805-0.28675
  -4  -7   2   37.06   18.65   1-0.75118-0.41945-0.65830-0.49853-0.04851 0.75862
   4   7  -1  235.38   24.05   1 0.30705-0.04639 0.92638 0.81151 0.21800-0.58248
  -4   7   1  247.77   20.64   1 0.20521-0.52114 0.96799 0.78957 0.14449-0.32400
  -4  -7   1  241.24   24.28   1-0.74390-0.39445-0.66461-0.55375-0.06994 0.73331
   4  -7  -1  233.04   21.77   1-0.78176-0.05857-0.36309-0.18533 0.50695 0.98092
   4   7   0  239.30   20.48   1 0.35068-0.02047 0.90264 0.83672 0.24950-0.54723
  -4   7   0  228.71   22.29   1 0.15924-0.54937 0.98094 0.75357 0.11131-0.36097
  -4  -7   0  224.47   24.86   1-0.73404-0.36687-0.67211-0.61017-0.09717 0.70220
   4  -7   0  206.00   21.20   1-0.78082-0.07540-0.36033-0.13370 0.51036 0.98814
   4   7   1   83.33   19.77   1 0.39339 0.00448 0.87559 0.85859 0.28032-0.51263
  -4   7  -1   91.08   20.56   1 0.11430-0.57657 0.99031 0.71399 0.07887-0.39719
   4  -7   1   51.99   18.52   1-0.78079-0.09315-0.36026-0.08477 0.51045 0.99203
  -4   7  -2   12.11   22.09   1 0.07087-0.60226 0.99635 0.67109 0.04752-0.43233
  -4  -7  -2    5.31   17.20   1-0.42990-0.02421-0.84653-0.87940-0.31394 0.47546
   4  -7   2   11.01   17.23   1-0.78158-0.11172-0.36256-0.03820 0.50762 0.99300
  -4   7  -3  306.22   27.97   1 0.02938-0.62601 0.99941 0.62520 0.01757-0.46607
  -4  -7  -3  353.76   23.49   1-0.46971-0.04626-0.81359-0.89537-0.34268 0.44290
   4  -7   3  343.04   24.65   1-0.78305-0.13097-0.36693 0.00628 0.50217 0.99136
  -4   7  -4  317.32   24.44   1-0.00980-0.64747 0.99989 0.57674-0.01071-0.49814
  -4  -7  -4  330.01   25.18   1-0.50751-0.06631-0.77817-0.90886-0.36996 0.41179
   4  -7   4  354.87   25.21   1-0.78509-0.15079-0.37313 0.04894 0.49436 0.98735
  -4   7  -5  262.46   21.60   1-0.04650-0.66636 0.99822 0.52606-0.03719-0.52840
  -4  -7  -5  226.80   22.64   1-0.54309-0.08414-0.74061-0.92020-0.39565 0.38228
   4  -7   5  254.48   21.06   1-0.78756-0.17104-0.38097 0.08996 0.48435 0.98114
   4   7   5  226.28   23.67   1-0.52911-0.98876-0.04403 0.13244 0.84740 0.06930
   5   0 -16   -3.09   16.34   1-0.78926-0.29462 0.21986-0.46201-0.57334-0.83650
  -5   0  16    1.40   16.40   1 0.28138-0.21715-0.64206 0.03594 0.71314 0.97547
   5   0 -15 2177.38   78.20   1-0.79479-0.31788 0.18701-0.44593-0.57733-0.83671
  -5   0  15 2406.24   51.73   1 0.27279-0.20772-0.63861-0.00940 0.71955 0.97814
   5   0 -14    4.55   16.65   1-0.79942-0.34023 0.15403-0.42998-0.58067-0.83627
  -5   0  14   -4.39   16.42   1 0.26648-0.19600-0.63603-0.05563 0.72418 0.97902
   5   0 -13  493.80   29.83   1-0.80316-0.36170 0.12079-0.41428-0.58337-0.83518
  -5   0  13  511.79   32.07   1-0.51397-0.95755-0.71027-0.17738-0.48097-0.22722
  -5   0  13  526.50   32.55   1 0.26279-0.18167-0.63450-0.10291 0.72687 0.97795
   5   0 -12   -5.64   10.93   1-0.80602-0.38227 0.08715-0.39900-0.58543-0.83346
  -5   0  12    8.87   13.73   1-0.52293-0.94865-0.71125-0.22725-0.46973-0.22000
  -5   0  12   -6.80   13.29   1 0.26210-0.16434-0.63421-0.15143 0.72737 0.97470
   5   0 -11  153.18   15.26   1-0.80797-0.40195 0.05287-0.38435-0.58684-0.83108
  -5   0  11  165.40   17.97   1-0.52820-0.93607-0.71177-0.27666-0.46300-0.21729
  -5   0  11  154.55   16.33   1 0.26489-0.14353-0.63537-0.20140 0.72535 0.96893
   5   0 -10   -0.06   11.07   1-0.80897-0.42068 0.01764-0.37065-0.58757-0.82802
  -5   0  10    8.44   12.68   1-0.52963-0.91964-0.71190-0.32569-0.46117-0.21947
  -5   0  10    4.02   10.91   1 0.27175-0.11865-0.63818-0.25302 0.72032 0.96015
   5   0  -9 3376.04  175.13   1-0.80895-0.43839-0.01903-0.35840-0.58755-0.82423
  -5   0   9 3280.67  169.75   1-0.52692-0.89908-0.71165-0.37434-0.46465-0.22697
  -5   0   9 3230.02  162.56   1 0.28340-0.08897-0.64287-0.30652 0.71161 0.94769
   5   0  -8   -6.21    7.50   1-0.80774-0.45490-0.05793-0.34837-0.58668-0.81956
  -5   0   8   -0.84   10.82   1-0.51964-0.87394-0.71091-0.42250-0.47389-0.24022
  -5   0   8    7.72   10.01   1 0.30071-0.05364-0.64959-0.36205 0.69827 0.93061
   5   0  -7 2046.64   76.65   1-0.80495-0.46969-0.10109-0.34238-0.58466-0.81373
  -5   0   7 2040.63   87.05   1-0.50718-0.84364-0.70944-0.46993-0.48932-0.25967
  -5   0   7 2063.41   75.57   1 0.32467-0.01166-0.65843-0.41970 0.67900 0.90758
   5   0  -6   -2.66    6.33   1-0.79995-0.48243-0.14982-0.34219-0.58105-0.80632
  -5   0   6    3.58    8.63   1-0.48880-0.80740-0.70682-0.51621-0.51133-0.28569
  -5   0   6    5.21   10.24   1 0.35621 0.03791-0.66921-0.47918 0.65212 0.87689
   5   0  -5   50.88    8.31   1-0.79101-0.49123-0.21003-0.35347-0.57460-0.79607
  -5   0   5   55.49   11.12   1-0.46358-0.76432-0.70241-0.56069-0.54010-0.31847
  -5   0   5   50.14   13.25   1 0.39679 0.09651-0.68152-0.54031 0.61487 0.83590
   5   0  -4   -0.42    4.91   1-0.77309-0.49104-0.29470-0.38922-0.56167-0.77934
  -5   0   4   -4.37    8.82   1-0.43048-0.71337-0.69529-0.60247-0.57554-0.35793
   5   0  -4    1.95    6.19   1-0.44484-0.16214 0.69855 0.60660-0.56047-0.77829
   5   0  -3  229.39   14.33   1-0.72532-0.46099-0.44268-0.48811-0.52719-0.74110
  -5   0   3  251.14   18.82   1-0.38849-0.65353-0.68428-0.64036-0.61710-0.40351
   5   0  -3  273.10   16.61   1-0.50478-0.24016 0.70913 0.66596-0.49226-0.70626
   5   0  -2    0.07    5.64   1-0.53320-0.28661-0.75150-0.74801-0.38851-0.59859
  -5   0   2    2.40   10.86   1-0.33636-0.58346-0.66787-0.67317-0.66393-0.45432
   5   0  -2   -1.84    8.54   1-0.57261-0.32609 0.71403 0.71965-0.40281-0.61299
  -5   0   1 3907.51  139.64   1-0.27437-0.50355-0.64477-0.69896-0.71342-0.50782
   5   0  -1 3685.55  125.87   1-0.64403-0.41559 0.70811 0.76252-0.28947-0.49582
  -5   0   0   -1.82    5.56   1-0.49987-0.71060 0.78568 0.68480-0.36445-0.16148
  -5   0   0    1.09    9.54   1-0.20221-0.41347-0.61347-0.71654-0.76338-0.56178
   5   0   0    3.83    6.90   1-0.71165-0.50130 0.68567 0.78886-0.15298-0.35551
  -5   0  -1 1388.30   55.36   1-0.67549-0.86863 0.54991 0.40018-0.49122-0.29209
  -5   0  -1 1561.87   62.37   1-0.12084-0.31418-0.57293-0.72488-0.81064-0.61304
   5   0   1 1467.88   56.39   1-0.76624-0.57398 0.64254 0.79452 0.00053-0.19817
  -5   0  -2   -8.01    9.86   1-0.74199-0.91750 0.39833 0.19957-0.53922-0.34403
  -5   0  -2   -2.31    8.30   1-0.03146-0.20679-0.52239-0.72346-0.85212-0.65865
   5   0   2  -13.49   12.03   1-0.79982-0.62566 0.57857 0.77930 0.15980-0.03507
  -5   0  -3  229.58   26.14   1-0.77015-0.92793 0.30623 0.05853-0.55954-0.36812
  -5   0  -3  240.98   19.13   1 0.06207-0.09530-0.46295-0.71291-0.88420-0.69474
   5   0   3  305.66   28.64   1-0.80892-0.65285 0.49823 0.74774 0.31210 0.12104
  -5   0  -4   -0.62    9.50   1-0.78313-0.92326 0.25106-0.04564-0.56891-0.38144
  -5   0  -4    4.62    9.33   1 0.15816 0.01860-0.39487-0.69384-0.90501-0.71988
   5   0   4    1.03    7.60   1-0.79544-0.65743 0.40900 0.70725 0.44719 0.25994
  -5   0  -5 1650.18   61.39   1-0.78958-0.91199 0.21809-0.12753-0.57357-0.38988
  -5   0  -5 1847.26   73.00   1 0.25219 0.13056-0.32104-0.66890-0.91286-0.73179
   5   0   5 1671.76   60.42   1-0.76464-0.64472 0.31783 0.66487 0.56062 0.37719
  -5   0  -6   -4.03    9.45   1-0.79273-0.89741 0.19993-0.19463-0.57584-0.39593
  -5   0  -6    1.27    9.48   1 0.34222 0.23851-0.24299-0.63974-0.90765-0.73064
   5   0   6    8.31    7.74   1-0.72273-0.62079 0.23039 0.62606 0.65159 0.47187
  -5   0  -7 6152.72  213.65   1-0.79404-0.88099 0.19186-0.25162-0.57678-0.40066
   5   0   7 5974.67  219.99   1-0.41251-0.32454 0.16880 0.61264 0.89517 0.72065
   5   0   7 5957.50  205.52   1-0.67431-0.59044 0.14860 0.59304 0.72333 0.54742
  -5   0  -8   -6.67   12.06   1-0.79417-0.86340 0.19098-0.30143-0.57689-0.40454
   5   0   8   -1.24    8.44   1-0.48881-0.41863 0.08940 0.58210 0.86779 0.69706
   5   0   8    2.23    8.96   1-0.62316-0.55721 0.07409 0.56731 0.77857 0.60636
  -5   0  -9 2533.83  135.90   1-0.79347-0.84498 0.19539-0.34595-0.57638-0.40782
   5   0   9 2438.85  124.45   1-0.55716-0.50478 0.01081 0.55236 0.83033 0.66339
   5   0   9 2419.67  125.29   1-0.57109-0.52319 0.00627 0.54826 0.82085 0.65243
  -5   0 -10    1.32   14.87   1-0.79208-0.82586 0.20381-0.38646-0.57537-0.41060
   5   0  10   -0.62    6.92   1-0.61719-0.58260-0.06594 0.52445 0.78404 0.62089
   5   0  10    1.18   10.78   1-0.51943-0.48958-0.05518 0.53557 0.85272 0.68808
  -5   0 -11 1719.72   52.63   1-0.79007-0.80612 0.21537-0.42383-0.57392-0.41294
   5   0  11 1414.55   58.95   1-0.66883-0.65205-0.14015 0.49911 0.73007 0.57071
   5   0  11 1682.76   49.68   1-0.46878-0.45699-0.11101 0.52852 0.87630 0.71541
  -5   0 -12   -4.82   12.53   1-0.78747-0.78580 0.22942-0.45871-0.57205-0.41484
   5   0  12   -1.46    8.90   1-0.71222-0.71323-0.21135 0.47676 0.66937 0.51380
   5   0  12   -8.46   12.63   1-0.41931-0.42558-0.16203 0.52627 0.89326 0.73615
  -5   0 -13 1358.81   35.54   1-0.78428-0.76488 0.24552-0.49154-0.56974-0.41633
   5   0  13 1502.44   38.01   1-0.37106-0.39539-0.20891 0.52816 0.90480 0.75146
  -5   0 -14   -5.09   12.85   1-0.78049-0.74336 0.26330-0.52268-0.56701-0.41737
   5   0  14    0.43   11.83   1-0.32395-0.36633-0.25223 0.53360 0.91182 0.76227
  -5   0 -15 4387.73   72.10   1-0.77607-0.72122 0.28252-0.55239-0.56381-0.41796
   5   0  15 4315.05  261.93   1-0.27759-0.33777-0.29271 0.54256 0.91501 0.76911
  -5   0 -16   -5.77   16.75   1-0.77104-0.69842 0.30276-0.58102-0.56019-0.41786
   5  -1 -16  141.39   19.54   1-0.80789-0.23618 0.05456-0.60640-0.58679-0.75926
  -5  -1  16  128.44   17.94   1 0.36406-0.05757-0.67173 0.02782 0.64516 0.99795
  -5   1  16  172.94   26.78   1 0.21459-0.36077-0.61345 0.04315 0.76001 0.93165
   5   1 -15   89.96   18.54   1-0.74952-0.34983 0.37623-0.27776-0.54465-0.89468
   5  -1 -15   88.71   14.76   1-0.80906-0.25508 0.00962-0.60241-0.58763-0.75632
  -5  -1  15   98.79   20.04   1 0.35890-0.04472-0.67008-0.01933 0.64975 0.99881
  -5   1  15   92.72   16.37   1 0.20324-0.35410-0.60821-0.00040 0.76731 0.93520
   5   1 -14 1454.18   81.17   1-0.75489-0.37291 0.35951-0.24555-0.54853-0.89478
   5  -1 -14 1450.72   79.45   1-0.80855-0.27229-0.03696-0.60007-0.58726-0.75217
  -5  -1  14 1443.31   82.84   1-0.60970-0.99392-0.71267-0.10999-0.34693 0.00177
  -5  -1  14 1446.50   78.98   1 0.35638-0.02922-0.66926-0.06733 0.65197 0.99730
  -5   1  14 1434.74   78.60   1 0.19384-0.34547-0.60378-0.04479 0.77321 0.93735
   5   1 -13  307.40   20.08   1-0.75924-0.39499 0.34525-0.21088-0.55167-0.89415
   5  -1 -13  325.24   20.17   1-0.80610-0.28739-0.08601-0.59996-0.58549-0.74662
  -5  -1  13  293.81   21.65   1-0.62093-0.98734-0.71157-0.15779-0.32879 0.01591
  -5  -1  13  333.02   22.52   1 0.35685-0.01074-0.66941-0.11629 0.65156 0.99315
  -5   1  13  333.17   21.90   1 0.18667-0.33462-0.60036-0.09017 0.77763 0.93802
   5   1 -12  189.83   15.59   1-0.76251-0.41599 0.33407-0.17312-0.55403-0.89273
   5  -1 -12  192.33   20.37   1-0.80141-0.30044-0.13743-0.60246-0.58210-0.73944
  -5  -1  12  205.87   19.89   1-0.62969-0.97828-0.71045-0.20558-0.31422 0.02648
  -5  -1  12  185.79   15.29   1 0.36071 0.01113-0.67066-0.16635 0.64814 0.98600
  -5   1  12  166.16   16.85   1 0.18206-0.32121-0.59813-0.13675 0.78043 0.93708
   5   1 -11   56.77   13.27   1-0.76455-0.43575 0.32690-0.13136-0.55550-0.89042
   5  -1 -11   71.01   13.82   1-0.79397-0.31074-0.19228-0.60838-0.57674-0.73027
  -5   1  11   52.95   11.68   1-0.33765-0.82279-0.66831-0.25434-0.66283-0.50825
  -5  -1  11   65.07   12.77   1-0.63599-0.96675-0.70951-0.25354-0.30349 0.03320
  -5  -1  11   75.55   16.41   1 0.36845 0.03689-0.67311-0.21761 0.64121 0.97533
  -5   1  11   60.67   15.08   1 0.18043-0.30482-0.59734-0.18477 0.78142 0.93431
   5   1 -10  986.38   33.99   1-0.76506-0.45398 0.32509-0.08424-0.55587-0.88701
   5  -1 -10  899.95   30.67   1-0.78303-0.31754-0.25153-0.61871-0.56884-0.71858
  -5   1  10  957.36   36.93   1-0.33533-0.80256-0.66752-0.30243-0.66480-0.51422
  -5  -1  10  910.81   36.73   1-0.63975-0.95269-0.70888-0.30182-0.29697 0.03572
  -5  -1  10 1018.34   37.52   1 0.38062 0.06708-0.67683-0.27015 0.63009 0.96047
  -5   1  10  925.79   34.84   1 0.18231-0.28491-0.59825-0.23449 0.78028 0.92942
   5   1  -9    3.60    8.80   1-0.76348-0.47012 0.33071-0.02969-0.55473-0.88210
   5  -1  -9   -0.27    9.29   1-0.76743-0.31967-0.31646-0.63471-0.55758-0.70351
  -5   1   9   -2.29    9.79   1-0.32706-0.77637-0.66464-0.34845-0.67176-0.52518
  -5  -1   9    9.50   11.04   1-0.64082-0.93594-0.70869-0.35053-0.29510 0.03359
  -5  -1   9    5.78   13.82   1 0.39784 0.10232-0.68182-0.32394 0.61387 0.94052
  -5   1   9   -4.61    8.74   1 0.18838-0.26082-0.60118-0.28623 0.77658 0.92197
   5   1  -8 1275.87   62.47   1-0.75868-0.48305 0.34712 0.03564-0.55127-0.87486
   5  -1  -8 1197.77   59.14   1-0.74528-0.31518-0.38886-0.65797-0.54159-0.68390
  -5   1   8 1244.01   63.92   1-0.31251-0.74390-0.65942-0.39211-0.68373-0.54115
  -5  -1   8 1218.47   64.01   1-0.63894-0.91623-0.70902-0.39976-0.29839 0.02631
  -5   1   8 1264.62   63.31   1 0.19949-0.23168-0.60645-0.34031 0.76968 0.91132
   5   1  -8 1274.86   63.01   1-0.41703-0.13881 0.69199 0.38351-0.58925-0.91304
   5   1  -7  179.49   15.12   1-0.74826-0.49035 0.38005 0.11750-0.54374-0.86356
   5  -1  -7  176.64   13.92   1-0.71373-0.30138-0.47053-0.69073-0.51882-0.65730
  -5   1   7  163.62   16.40   1-0.29127-0.70474-0.65143-0.43301-0.70056-0.56199
  -5  -1   7  188.20   14.90   1-0.63370-0.89317-0.70986-0.44951-0.30742 0.01327
  -5   1   7  190.80   14.94   1 0.21672-0.19643-0.61443-0.39709 0.75861 0.89650
   5   1  -7  176.68   13.42   1-0.44628-0.18614 0.69887 0.43917-0.55893-0.87890
   5   1  -6  665.56   29.88   1-0.72639-0.48621 0.43999 0.22638-0.52796-0.84400
   5  -1  -6  636.89   27.54   1-0.66796-0.27336-0.56377-0.73506-0.48578-0.62044
  -5   1   6  651.43   34.47   1-0.26295-0.65850-0.64013-0.47058-0.72186-0.58729
  -5  -1   6  694.04   30.39   1-0.62453-0.86618-0.71113-0.49968-0.32286-0.00616
  -5   1   6  611.37   30.70   1 0.24142-0.15371-0.62542-0.45689 0.74199 0.87613
   5   1  -6  663.86   28.77   1-0.48224-0.24019 0.70576 0.49486-0.51897-0.83511
   5   1  -5    4.56    5.67   1-0.67657-0.45428 0.54788 0.38302-0.49200-0.80431
   5  -1  -5    2.82    5.64   1-0.60025-0.22341-0.66992-0.79230-0.43691-0.56774
  -5   1   5   -0.23    8.05   1-0.22723-0.60487-0.62484-0.50418-0.74695-0.61638
  -5  -1   5    0.36   10.42   1-0.61066-0.83449-0.71259-0.55004-0.34539-0.03269
  -5   1   5   -2.20    9.03   1 0.27522-0.10189-0.63959-0.51987 0.71775 0.84814
   5   1  -5    1.50    6.81   1-0.52493-0.30097 0.71145 0.54933-0.46719-0.77951
   5   1  -4    4.54    5.14   1-0.53954-0.33507 0.74456 0.62870-0.39308-0.70174
   5  -1  -4    9.35    7.04   1-0.49915-0.14005-0.78638-0.85986-0.36393-0.49093
  -5   1   4   14.83    9.82   1-0.18399-0.54372-0.60487-0.53309-0.77477-0.64821
  -5  -1   4   10.14   10.26   1-0.59109-0.79709-0.71376-0.60012-0.37569-0.06699
  -5   1   4    2.26    9.93   1 0.32000-0.03909-0.65675-0.58585 0.68283 0.80947
   5   1  -4    2.22    8.81   1-0.57363-0.36775 0.71403 0.60070-0.40136-0.70986
  -5   1   3   65.94   10.84   1 0.35009 0.00892 0.90299 0.92800 0.24907 0.37245
   5   1  -3   31.25    6.40   1 0.01467 0.20159 0.99986 0.93309 0.00695-0.29781
  -5   1   3   63.92   11.73   1-0.13343-0.47524-0.57956-0.55666-0.80392-0.68137
  -5  -1   3   54.06    9.98   1-0.56452-0.75270-0.71391-0.64916-0.41429-0.10960
  -5   1   3   51.33   10.30   1 0.37750 0.03642-0.67589-0.65372 0.63297 0.75585
   5   1  -3   58.22    9.85   1-0.62645-0.43866 0.71089 0.64634-0.31966-0.62434
  -5   1   2 1835.43   71.88   1 0.15053-0.17291 0.98300 0.95895 0.10503 0.22472
  -5   1   2 1980.16   76.27   1-0.07551-0.39938-0.54807-0.57434-0.83301-0.71457
  -5  -1   2 1870.81   73.38   1-0.52910-0.69946-0.71185-0.69625-0.46185-0.16117
   5   1  -2 1786.66   67.15   1-0.68005-0.51035 0.69889 0.68313-0.22150-0.52235
   5  -1  -2 1906.09   69.24   1-0.44882-0.12548 0.69941 0.72641-0.55620-0.67570
  -5   1   1   41.16   10.07   1-0.07671-0.38240 0.99530 0.92224-0.05900 0.05694
  -5   1   1   35.59   12.52   1-0.01244-0.31836-0.51084-0.58599-0.85957-0.74515
  -5  -1   1   30.80   11.48   1-0.48369-0.63619-0.70600-0.73931-0.51729-0.22063
   5   1  -1   25.32   13.09   1-0.72977-0.57816 0.67503 0.70806-0.10839-0.40542
   5  -1  -1   39.23    8.19   1-0.53359-0.22832 0.71224 0.78802-0.45606-0.57173
  -5   1   0 1226.33   51.39   1-0.28605-0.57394 0.93489 0.81303-0.21011-0.09776
  -5  -1   0 1179.18   47.59   1-0.80476-0.93884-0.10329-0.18357-0.58453-0.29132
  -5   1   0 1215.92   52.02   1 0.05501-0.23294-0.46767-0.59170-0.88218-0.77176
  -5  -1   0 1214.09   52.10   1-0.42620-0.56085-0.69426-0.77646-0.57994-0.28730
   5   1   0 1177.18   51.59   1-0.77038-0.63685 0.63739 0.71920 0.01544-0.27777
   5  -1   0 1199.50   46.87   1-0.62575-0.33858 0.71098 0.83555-0.32082-0.43268
  -5   1  -1 2285.64   86.42   1-0.44678-0.71698 0.83308 0.66228-0.32613-0.21752
  -5  -1  -1 2416.47   91.81   1-0.80101-0.91735-0.14088-0.27009-0.58182-0.29242
  -5   1  -1 2389.97   90.21   1 0.12524-0.14476-0.41901-0.59192-0.89929-0.79288
  -5  -1  -1 2347.07   88.99   1-0.35516-0.47195-0.67412-0.80522-0.64762-0.35899
   5   1   1 2372.70   89.25   1-0.79747-0.68204 0.58604 0.71660 0.14347-0.14590
   5  -1   1 2259.56   80.32   1-0.71321-0.44413 0.68485 0.85821-0.14930-0.25733
  -5   1  -2  116.99   13.79   1-0.55616-0.80863 0.72566 0.50592-0.40508-0.30024
  -5  -1  -2  101.01   12.85   1-0.80066-0.89925-0.14395-0.32208-0.58156-0.29596
  -5   1  -2   94.58   13.06   1 0.19693-0.05521-0.36533-0.58709-0.90980-0.80763
  -5  -1  -2   90.06   13.20   1-0.26981-0.36845-0.64293-0.82308-0.71681-0.43216
   5   1   2  125.58   21.47   1-0.80876-0.71142 0.52320 0.70255 0.26861-0.01694
   5  -1   2  117.88   13.13   1-0.77881-0.52781 0.62538 0.84752 0.04840-0.05580
  -5   1  -3 1599.20   62.07   1-0.62639-0.86126 0.63236 0.36378-0.45578-0.35479
  -5  -1  -3 1773.30   68.60   1-0.80174-0.88260-0.13444-0.36149-0.58235-0.30054
  -5   1  -3 1797.72   75.52   1 0.26769 0.03347-0.30814-0.57879-0.91290-0.81478
  -5  -1  -3 1737.20   68.23   1-0.17066-0.25138-0.59839-0.82742-0.78281-0.50216
   5   1   3 1674.55   64.00   1-0.80448-0.72520 0.45275 0.68083 0.38446 0.10271
   5  -1   3 1717.96   65.55   1-0.80809-0.57520 0.53327 0.80417 0.25021 0.14983
  -5   1  -4   67.28   10.94   1-0.67137-0.88852 0.55754 0.24003-0.48824-0.39102
  -5  -1  -4   75.33   12.27   1-0.80336-0.86648-0.11882-0.39480-0.58351-0.30550
  -5   1  -4   86.81   15.64   1 0.33640 0.12011-0.24827-0.56782-0.90840-0.81434
  -5  -1  -4   48.15   11.84   1-0.05908-0.12178-0.53867-0.81679-0.84044-0.56392
   5   1   4   68.52    9.45   1-0.78681-0.72561 0.37855 0.65542 0.48746 0.20953
   5  -1   4   69.90   11.56   1-0.79816-0.58334 0.42024 0.73988 0.43164 0.33508
  -5   1  -5  562.28   27.66   1-0.70006-0.89950 0.50086 0.13437-0.50895-0.41573
  -5  -1  -5  588.97   28.16   1-0.80506-0.85044-0.09972-0.42462-0.58474-0.31053
  -5  -1  -5  560.51   28.94   1 0.05989 0.01514-0.46441-0.79142-0.88358-0.61108
   5   1   5  600.86   27.73   1-0.75895-0.71576 0.30446 0.62997 0.57557 0.30134
   5  -1   5  549.12   25.16   1-0.75802-0.56116 0.30233 0.67064 0.57792 0.48510
  -5   1  -6   72.55   11.88   1-0.71866-0.90037 0.45896 0.04354-0.52237-0.43293
  -5  -1  -6   79.34    9.96   1-0.80660-0.83425-0.07839-0.45222-0.58586-0.31545
  -5  -1  -6   40.81   14.47   1 0.18322 0.15624-0.37592-0.75209-0.90835-0.64026
   5  -1   6   87.37   11.09   1-0.45398-0.27178 0.12661 0.54235 0.88196 0.79497
   5  -1   6   79.43    9.78   1-0.70024-0.52146 0.19063 0.60771 0.68797 0.59896
   5   1   6   89.28   10.16   1-0.72378-0.69867 0.23234 0.60661 0.64973 0.37930
  -5   1  -7 1503.02   58.23   1-0.73066-0.89465 0.42910-0.03525-0.53104-0.44537
  -5  -1  -7 1499.76   59.47   1-0.80783-0.81772-0.05591-0.47850-0.58674-0.31993
   5  -1   7 1500.38   59.46   1-0.51047-0.34606 0.06535 0.52995 0.85740 0.77420
   5  -1   7 1533.00   59.28   1-0.63551-0.47468 0.09124 0.55710 0.76667 0.68140
   5   1   7 1618.80   61.80   1-0.68395-0.67691 0.16382 0.58685 0.71089 0.44427
  -5   1  -8   41.65   13.33   1-0.73826-0.88452 0.40878-0.10449-0.53652-0.45463
  -5  -1  -8   35.70   13.13   1-0.80869-0.80085-0.03190-0.50342-0.58736-0.32433
   5  -1   8   46.32   11.03   1-0.56222-0.41561 0.00464 0.51809 0.82696 0.74755
   5  -1   8   38.12    8.88   1-0.56976-0.42699 0.00463 0.51925 0.82179 0.74030
   5   1   8   54.10   10.21   1-0.64153-0.65239 0.09978 0.57160 0.76057 0.49764
  -5   1  -9 1964.31  101.49   1-0.74280-0.87134 0.39605-0.16615-0.53980-0.46168
  -5  -1  -9 2110.33  108.83   1-0.80908-0.78352-0.00703-0.52748-0.58764-0.32840
   5  -1   9 2008.33  105.82   1-0.60907-0.48026-0.05505 0.50724 0.79119 0.71557
   5   1   9 1812.39  111.41   1-0.49686-0.52092 0.08055 0.60134 0.86408 0.60582
   5  -1   9 1914.40  101.15   1-0.50612-0.38141-0.07024 0.49316 0.85959 0.78186
   5   1   9 2137.60  110.31   1-0.59754-0.62645 0.03987 0.56045 0.80084 0.54170
  -5   1 -10    3.13   16.12   1-0.74510-0.85592 0.38938-0.22175-0.54146-0.46712
  -5  -1 -10    3.15   16.58   1-0.80896-0.76567 0.01851-0.55085-0.58756-0.33210
   5  -1  10   -0.05    8.49   1-0.65096-0.53994-0.11341 0.49774 0.75058 0.67875
   5   1  10    8.86    7.47   1-0.58535-0.62720-0.02418 0.54546 0.81041 0.55594
   5  -1  10    1.85    8.75   1-0.44561-0.33896-0.13530 0.47686 0.88493 0.81098
   5   1  10   11.77   11.18   1-0.55296-0.59994-0.01587 0.55348 0.83305 0.57768
  -5   1 -11  698.63   36.15   1-0.74571-0.83881 0.38761-0.27245-0.54190-0.47134
  -5  -1 -11  703.40   30.52   1-0.80829-0.74728 0.04465-0.57364-0.58708-0.33540
   5  -1  11  698.68   28.09   1-0.68790-0.59468-0.17020 0.48981 0.70556 0.63751
   5  -1  11  692.13   27.94   1-0.38837-0.29978-0.19239 0.46854 0.90119 0.83101
   5   1  11  757.20   32.53   1-0.50836-0.57338-0.06772 0.55040 0.85847 0.60685
  -5   1 -12  127.48   17.37   1-0.74494-0.82032 0.38985-0.31915-0.54135-0.47456
  -5  -1 -12  115.50   17.46   1-0.80704-0.72830 0.07129-0.59593-0.58617-0.33828
   5  -1  12   99.34   13.03   1-0.71994-0.64452-0.22525 0.48361 0.65645 0.59220
   5  -1  12  108.04   12.84   1-0.33413-0.26359-0.24307 0.46664 0.91064 0.84425
   5   1  12  113.23   17.15   1-0.46397-0.54705-0.11611 0.55078 0.87820 0.63036
  -5   1 -13  197.74   18.10   1-0.74302-0.80067 0.39540-0.36253-0.53996-0.47695
  -5  -1 -13  217.30   17.83   1-0.80517-0.70870 0.09838-0.61777-0.58482-0.34071
   5  -1  13  191.56   14.84   1-0.74713-0.68950-0.27849 0.47924 0.60351 0.54304
   5  -1  13  171.51   14.36   1-0.28218-0.22951-0.28880 0.47024 0.91485 0.85217
   5   1  13  216.53   17.28   1-0.41996-0.52109-0.16138 0.55428 0.89307 0.64902
  -5   1 -14   -0.38   17.01   1-0.74008-0.78001 0.40373-0.40313-0.53784-0.47860
  -5  -1 -14   -3.56   13.85   1-0.80265-0.68846 0.12588-0.63920-0.58300-0.34268
   5  -1  14    2.21   12.73   1-0.23260-0.19796-0.33010 0.47774 0.91483 0.85590
   5   1  14    4.47   13.88   1-0.37636-0.49555-0.20389 0.56055 0.90375 0.66348
  -5   1 -15  372.34   29.88   1-0.73620-0.75840 0.41441-0.44139-0.53504-0.47957
  -5  -1 -15  371.28   31.69   1-0.79946-0.66754 0.15376-0.66025-0.58070-0.34416
   5   1  15  374.09   32.54   1-0.33317-0.47041-0.24393 0.56927 0.91076 0.67426
  -5   1 -16   -6.38   14.88   1-0.73142-0.73590 0.42710-0.47762-0.53159-0.47990
  -5  -1 -16   -6.40   20.89   1-0.79556-0.64591 0.18201-0.68093-0.57788-0.34513
   5   1  16   12.38   20.19   1-0.29012-0.44512-0.28198 0.58073 0.91450 0.68162
   5  -2 -16  683.37   31.79   1-0.80593-0.15699-0.08833-0.72816-0.58537-0.66717
  -5   2  16  797.44   29.88   1 0.16447-0.48771-0.58949 0.04572 0.79085 0.87180
   5  -2 -15  197.65   20.83   1-0.80099-0.16979-0.14108-0.73199-0.58181-0.65980
  -5  -2  15  177.71   19.39   1-0.65798-0.98318-0.70516-0.03302-0.26420 0.17962
  -5   2  15  222.34   18.86   1 0.15119-0.48297-0.58279 0.00360 0.79842 0.87562
   5   2 -15  224.63   21.10   1-0.45425-0.12623 0.70055 0.02918-0.55034-0.99157
   5   2 -14 1177.95   49.68   1-0.67354-0.36894 0.55356-0.07271-0.48980-0.92660
   5  -2 -14 1146.37   46.90   1-0.79339-0.17993-0.19586-0.73786-0.57632-0.65052
  -5  -2  14 1251.40   52.41   1-0.66968-0.97706-0.70210-0.07886-0.24201 0.19781
  -5   2  14 1145.71   46.24   1 0.13961-0.47652-0.57684-0.03924 0.80483 0.87828
   5   2 -14 1225.39   46.55   1-0.45565-0.14572 0.70083 0.07826-0.54882-0.98622
   5   2 -13  151.93   16.08   1-0.67276-0.38587 0.55500-0.02233-0.48924-0.92227
   5  -2 -13  131.52   15.07   1-0.78271-0.18698-0.25305-0.74612-0.56861-0.63901
  -5  -2  13  155.47   18.31   1-0.67947-0.96902-0.69909-0.12476-0.22268 0.21314
  -5   2  13  147.78   18.67   1 0.13001-0.46808-0.57182-0.08301 0.81000 0.87977
   5   2 -13  132.96   14.61   1-0.46023-0.16839 0.70175 0.12796-0.54379-0.97737
   5   2 -12  108.44   15.11   1-0.66915-0.39999 0.56160 0.03320-0.48664-0.91591
   5  -2 -12  122.58   15.77   1-0.76835-0.19036-0.31303-0.75718-0.55824-0.62484
  -5  -2  12  111.01   18.47   1-0.68742-0.95915-0.69631-0.17088-0.20638 0.22543
  -5   2  12  101.15   15.72   1 0.12255-0.45752-0.56787-0.12787 0.81393 0.87995
   5   2 -12  130.05   12.83   1-0.46835-0.19460 0.70331 0.17831-0.53478-0.96453
   5   2 -11  175.58   17.30   1-0.66189-0.41045 0.57458 0.09512-0.48140-0.90690
   5  -2 -11  170.37   16.24   1-0.74949-0.18912-0.37634-0.77133-0.54463-0.60768
  -5  -2  11  187.08   20.32   1-0.69359-0.94750-0.69393-0.21741-0.19335 0.23446
  -5   2  11  155.80   16.24   1 0.11763-0.44441-0.56525-0.17406 0.81648 0.87874
   5   2 -11  178.69   13.71   1-0.48035-0.22469 0.70545 0.22923-0.52114-0.94708
   5   2 -10 2669.30   72.59   1-0.64965-0.41592 0.59551 0.16498-0.47256-0.89430
   5  -2 -10 2582.33   72.36   1-0.72511-0.18249-0.44322-0.78929-0.52703-0.58626
  -5  -2  10 2747.21   74.17   1-0.69797-0.93406-0.69211-0.26449-0.18388 0.23994
  -5   2  10 2464.27   72.03   1 0.11572-0.42831-0.56422-0.22184 0.81747 0.87597
   5   2 -10 2725.43   78.53   1-0.49660-0.25903 0.70800 0.28057-0.50210-0.92421
   5   2  -9  160.97   14.38   1-0.63032-0.41431 0.62639 0.24480-0.45861-0.87659
   5  -2  -9  159.19   14.69   1-0.69376-0.16890-0.51405-0.81122-0.50441-0.55981
  -5   2   9  117.04   15.43   1-0.03493-0.56121-0.52447-0.22929-0.85070-0.79527
  -5  -2   9  138.31   15.45   1-0.70050-0.91877-0.69100-0.31229-0.17830 0.24151
  -5   2   9  158.62   17.59   1 0.11738-0.40863-0.56511-0.27154 0.81661 0.87136
   5   2  -9  156.41   14.67   1-0.51740-0.29791 0.71066 0.33202-0.47669-0.89498
   5   2  -8 4967.49  251.55   1-0.60048-0.40219 0.66961 0.33697-0.43707-0.85128
   5  -2  -8 4845.53  244.71   1-0.65359-0.14648-0.58889-0.83715-0.47541-0.52698
  -5   2   8 4427.77  268.59   1-0.01999-0.52831-0.51546-0.26916-0.85667-0.80525
  -5  -2   8 4969.64  258.46   1-0.70106-0.90150-0.69076-0.36094-0.17707 0.23874
  -5   2   8 4627.01  235.57   1 0.12336-0.38462-0.56831-0.32355 0.81351 0.86450
   5   2  -8 5013.95  249.03   1-0.54292-0.34152 0.71293 0.38308-0.44379-0.85826
   5   2  -7 2695.87  123.12   1-0.55412-0.37366 0.72804 0.44438-0.40361-0.81418
   5  -2  -7 2775.35  125.21   1-0.60220-0.11284-0.66725-0.86660-0.43831-0.48606
  -5   2   7 2675.05  219.18   1 0.00138-0.48897-0.50227-0.30486-0.86470-0.81728
  -5  -2   7 2791.53  130.98   1-0.69942-0.88204-0.69148-0.41057-0.18069 0.23113
  -5   2   7 2652.97  120.37   1 0.13464-0.35532-0.57425-0.37830 0.80752 0.85476
   5   2  -7 2822.52  127.70   1-0.57309-0.38978 0.71403 0.43296-0.40213-0.81277
   5   2  -6 3095.26  114.20   1-0.48277-0.32004 0.80183 0.56712-0.35211-0.75890
   5  -2  -6 3158.85  110.53   1-0.53675-0.06515-0.74763-0.89806-0.39107-0.43500
  -5   2   6 3195.78  170.34   1 0.02877-0.44363-0.48487-0.33634-0.87410-0.83069
  -5  -2   6 3207.36  123.50   1-0.69526-0.86006-0.69325-0.46124-0.18976 0.21805
  -5   2   6 3047.24  114.70   1 0.15246-0.31949-0.58344-0.43631 0.79771 0.84115
   5   2  -6 3254.16  117.33   1-0.60747-0.44224 0.71285 0.48056-0.35045-0.75728
   5   2  -5  268.65   17.91   1-0.37223-0.22719 0.88729 0.70163-0.27231-0.67534
   5  -2  -5  242.08   16.31   1-0.45432-0.00046-0.82683-0.92836-0.33157-0.37167
  -5   2   5  270.53   20.61   1 0.06162-0.39282-0.46325-0.36359-0.88408-0.84468
  -5  -2   5  279.17   19.52   1-0.68809-0.83506-0.69606-0.51296-0.20499 0.19882
  -5   2   5  237.45   17.87   1 0.17860-0.27534-0.59645-0.49813 0.78252 0.82222
   5   2  -5  260.98   17.76   1-0.64502-0.49788 0.70792 0.52443-0.28770-0.69071
  -5   2   4 6176.00  196.90   1 0.35337-0.08262 0.90105 0.95407 0.25144 0.28793
   5   2  -4 6161.02  194.29   1-0.20755-0.08004 0.96611 0.82952-0.15345-0.55270
  -5   2   4 6307.08  250.16   1 0.09928-0.33721-0.43744-0.38666-0.89374-0.85835
  -5  -2   4 6216.65  196.06   1-0.67723-0.80639-0.69981-0.56561-0.22716 0.17265
  -5   2   4 6729.00  226.29   1 0.21518-0.22073-0.61373-0.56422 0.75962 0.79557
   5   2  -4 6363.27  197.19   1-0.68405-0.55499 0.69753 0.56282-0.21336-0.61254
  -5   2   3 3042.41  102.09   1 0.23261-0.18567 0.95859 0.96265 0.16427 0.19700
   5   2  -3 3215.10  108.70   1 0.01012 0.11990 0.99994 0.91223 0.00367-0.39173
  -5   2   3 2884.61  144.02   1 0.14095-0.27759-0.40760-0.40570-0.90221-0.87082
  -5  -2   3 3281.93  113.73   1-0.66177-0.77310-0.70423-0.61893-0.25713 0.13868
  -5   2   3 3185.94  110.92   1 0.26500-0.15289-0.63541-0.63471 0.72527 0.75746
   5   2  -3 3298.73  111.44   1-0.72210-0.61113 0.67987 0.59394-0.12784-0.52320
  -5   2   2 9137.96  318.71   1 0.09717-0.30341 0.99304 0.94805 0.06650 0.09556
  -5   2   2 9174.93  330.68   1 0.18563-0.21496-0.37406-0.42085-0.90863-0.88129
  -5  -2   2 9363.51  321.25   1-0.64044-0.73395-0.70876-0.67236-0.29576 0.09605
  -5   2   2 8591.71  309.26   1 0.33125-0.06862-0.66076-0.70887 0.67354 0.70198
   5   2  -2 9622.36  319.13   1-0.75624-0.66336 0.65346 0.61633-0.03283-0.42436
  -5   2   1 5191.23  183.74   1-0.04371-0.42654 0.99842 0.90441-0.03518-0.00986
  -5  -2   1 4922.66  179.08   1-0.41818-0.49300-0.85545-0.86613-0.30548 0.08223
  -5   2   1 5523.48  197.11   1 0.23273-0.14993-0.33693-0.43260-0.91231-0.88902
  -5  -2   1 5188.18  184.55   1-0.61163-0.68732-0.71250-0.72501-0.34384 0.04397
   5   2  -1 5220.74  176.63   1-0.78349-0.70870 0.61759 0.62924 0.06866-0.31905
   5  -2  -1 5242.28  177.64   1-0.41872-0.03664 0.69242 0.78958-0.58755-0.61255
  -5   2   014925.47  484.83   1 0.28107-0.08366-0.29682-0.44139-0.91262-0.89340
  -5   2  -1 4844.56  168.64   1-0.29734-0.64468 0.92948 0.73774-0.21826-0.20028
  -5  -2  -1 4741.28  166.75   1-0.62361-0.66292-0.63654-0.74504-0.45377-0.07370
  -5  -2  -1 4741.71  164.10   1-0.52266-0.56263-0.71122-0.82175-0.47007-0.09034
   5   2   1 4952.14  168.16   1-0.80891-0.77030 0.51975 0.62893 0.27480-0.10524
   5  -2   1 4729.88  160.30   1-0.64179-0.29588 0.70852 0.90325-0.29341-0.31077
  -5   2  -2 7372.35  229.86   1-0.39586-0.72546 0.87152 0.63085-0.28938-0.27519
  -5  -2  -2 7639.63  242.95   1-0.67495-0.69651-0.55092-0.70833-0.49083-0.11458
   5   2   2 7755.14  244.01   1-0.80574-0.78518 0.46134 0.61924 0.37140-0.00484
  -5   2  -3 3053.33  103.86   1-0.47340-0.78534 0.81032 0.52065-0.34534-0.33487
  -5  -2  -3 3047.47  104.74   1-0.70995-0.71376-0.47917-0.68549-0.51609-0.14366
  -5  -2  -3 3015.04  111.27   1-0.37488-0.37914-0.68028-0.88860-0.62981-0.25811
   5  -2   3 2911.72  102.13   1-0.42028-0.10825 0.16107 0.45099 0.89298 0.88593
   5   2   3 3243.82  100.89   1-0.79294-0.79047 0.39950 0.60619 0.46003 0.08760
   5  -2   3 3279.59  104.83   1-0.80597-0.49626 0.55084 0.84312 0.21672 0.20702
  -5   2  -4 5787.10  188.49   1-0.53253-0.82674 0.75222 0.41362-0.38802-0.38133
  -5  -2  -4 6308.53  202.21   1-0.73505-0.72110-0.41751-0.67274-0.53421-0.16561
  -5  -2  -4 6374.44  225.61   1-0.27307-0.25909-0.64425-0.90148-0.71439-0.34669
   5  -2   4 6042.88  188.59   1-0.46495-0.17072 0.11507 0.45386 0.87782 0.87456
   5   2   4 6320.17  189.06   1-0.77210-0.78772 0.33648 0.59196 0.53909 0.17048
   5  -2   4 6223.41  194.11   1-0.78977-0.49813 0.38833 0.72935 0.47481 0.46893
  -5   2  -5 3894.71  136.48   1-0.57675-0.85323 0.70070 0.31316-0.41995-0.41703
  -5  -2  -5 4349.58  150.71   1-0.75378-0.72208-0.36303-0.66716-0.54773-0.18295
  -5  -2  -5 4852.52  184.51   1-0.15098-0.11908-0.58858-0.89468-0.79421-0.43052
   5  -2   5 4237.10  150.10   1-0.50769-0.23126 0.06848 0.45612 0.85881 0.85934
   5  -2   5 4172.67  146.00   1-0.71359-0.43990 0.21380 0.60351 0.66713 0.66501
   5   2   5 4384.49  154.22   1-0.74511-0.77876 0.27423 0.57833 0.60794 0.24301
  -5   2  -6 4734.52  168.05   1-0.60929-0.86816 0.65736 0.22100-0.44343-0.44435
  -5  -2  -6 4846.87  171.39   1-0.76814-0.71877-0.31382-0.66676-0.55809-0.19695
  -5  -2  -6 4265.47  316.28   1-0.01012 0.03980-0.50941-0.86458-0.86045-0.50090
   5  -2   6 5022.05  180.54   1-0.54816-0.28952 0.02163 0.45812 0.83609 0.84041
   5  -2   6 4497.34  159.49   1-0.61350-0.35780 0.06097 0.49946 0.78733 0.78899
   5   2   6 4962.33  172.46   1-0.71341-0.76513 0.21347 0.56633 0.66743 0.30630
  -5   2  -7 2642.68  119.26   1-0.63333-0.87448 0.62174 0.13644-0.46078-0.46546
  -5  -2  -7 2427.11  109.09   1-0.77939-0.71228-0.26822-0.67009-0.56621-0.20887
  -5  -2  -7  755.79  373.72   1 0.14499 0.21267-0.40463-0.80912-0.90290-0.54780
   5  -2   7 2562.03  112.92   1-0.58613-0.34529-0.02518 0.46016 0.80982 0.81793
   5  -2   7 2140.93  104.19   1-0.51538-0.27775-0.05979 0.42747 0.85487 0.86030
   5   2   7 2559.98  117.48   1-0.67846-0.74826 0.15511 0.55673 0.71807 0.36074
  -5   2  -8 5428.89  269.86   1-0.65081-0.87424 0.59357 0.05934-0.47340-0.48184
  -5  -2  -8 5264.68  266.16   1-0.78823-0.70338-0.22542-0.67620-0.57259-0.21905
   5  -2   8 5456.36  273.89   1-0.62143-0.39838-0.07172 0.46248 0.78017 0.79207
   5  -2   8 4608.55  236.36   1-0.42841-0.20884-0.15288 0.38315 0.89055 0.89976
   5   2   8 5346.00  262.90   1-0.64151-0.72917 0.09975 0.55017 0.76060 0.40695
  -5   2  -9 1592.25   78.13   1-0.66331-0.86903 0.57208-0.01109-0.48242-0.49463
  -5  -2  -9 1578.37   73.24   1-0.79515-0.69256-0.18471-0.68442-0.57759-0.22784
   5  -2   9 1699.51   79.36   1-0.65394-0.44869-0.11778 0.46528 0.74731 0.76301
   5  -2   9 1365.33   67.33   1-0.35299-0.15148-0.22580 0.35901 0.90796 0.92095
   5   2   9 1698.56   79.66   1-0.60300-0.70873 0.04702 0.54621 0.79634 0.44648
  -5   2 -10 1317.31   45.93   1-0.67199-0.85999 0.55641-0.07569-0.48869-0.50466
  -5  -2 -10 1343.64   42.98   1-0.80046-0.68014-0.14559-0.69423-0.58142-0.23548
   5  -2  10 1334.48   44.08   1-0.68357-0.49612-0.16322 0.46869 0.71139 0.73088
   5   2  10 1288.60   43.97   1-0.56366-0.68744-0.00289 0.54506 0.82600 0.47992
  -5   2 -11  561.12   34.21   1-0.67767-0.84795 0.54581-0.13524-0.49279-0.51252
  -5  -2 -11  540.60   33.63   1-0.80438-0.66632-0.10770-0.70525-0.58425-0.24211
   5  -2  11  562.44   30.20   1-0.71026-0.54060-0.20791 0.47286 0.67252 0.69580
[truncated: 385,311 more chars]
